# Supplementary material for: Evolutionary transcriptomics implicates HAND2 in the origins of implantation and regulation of gestation length
Source: eLife. 2021 Feb 1;10:e61257. doi: 10.7554/eLife.61257 (PMC7943190; doi:10.7554/eLife.61257)
Supplement: Figure 1—figure supplement 1—source data 1. — HAND2 expression numbers used to generate Figure 1—figure supplement 1 are highlighted in yellow. [file elife-61257-fig1-figsupp1-data1.xlsx]

## Sheet: Figure 1—suppl1—source data 1
Figure 1—figure supplement 1—source data 1. Uterine gene expression data (in TPM) from four gravid (orange - Wal38, Wal40, Wal57, and Wal59) and four non-Gravid (blue - Wal39, Wal41, Wal58, and Wal60) tammar wallabies. HAND2 expression numbers used to generate Figure 1 - figure supplement 1 are highlighted in yellow.
Transcript stable ID	Gene name		Wal38	Wal40	Wal57	Wal59	AvgGravidWal		Wal39	Wal41	Wal58	Wal60	AvgNonGravidWal
ENSMEUT00000015958	A1CF		0.016101	0.0151091	0	0.0567607	0.0219927		0.0798681	0.0146747	0	0.175859	0.0676004
ENSMEUT00000015618	A4GNT		0	0	0	0	0		0	0.0283191	0	0	0.00707977
ENSMEUT00000012174	AAAS		52.0078	46.959	43.8948	37.7573	45.1547		60.965	46.746	45.0108	38.1096	47.7079
ENSMEUT00000011165	AACS		16.602	27.411	63.1455	74.5505	45.4273		24.0639	25.3607	62.2298	69.2828	45.2343
ENSMEUT00000001081	AADAC		0.318793	0.34531	0.522463	0.517264	0.425957		3.16185	0.40186	0.701767	0.804371	1.26746
ENSMEUT00000002155	AADACL2		0	0	0	0	0		0	0	0	0.108815	0.0272037
ENSMEUT00000014844	AADAT		22.5352	18.9672	36.1631	35.2683	28.2334		25.8625	21.0339	44.2156	33.906	31.2545
ENSMEUT00000010899	AAED1		1.57352	2.28664	3.74641	3.91098	2.87939		3.16123	3.85984	8.39965	7.65829	5.76975
ENSMEUT00000016727	AAGAB		14.9236	16.4114	57.8637	59.2837	37.1206		18.5929	16.1047	55.4296	59.6985	37.4564
ENSMEUT00000010731	AAK1		1.05248	1.52368	16.4811	13.8956	8.23822		1.01316	0.585079	18.7037	15.1098	8.85293
ENSMEUT00000004970	AAMDC		106.849	65.2037	53.277	44.4682	67.4495		95.9989	79.2223	61.7723	45.8584	70.713
ENSMEUT00000011291	AAMP		67.6328	76.7734	36.7973	39.9962	55.2999		72.3189	84.9525	33.3104	49.0609	59.9107
ENSMEUT00000012413	AANAT		3.11981	2.9272	3.53797	3.03329	3.15457		2.60936	2.27737	1.78961	2.18962	2.21649
ENSMEUT00000014090	AARS2		6.49358	7.1235	8.37859	8.87342	7.71727		6.81355	8.17255	7.49217	9.67487	8.03829
ENSMEUT00000016084	AASDH		24.6729	17.2564	44.7366	39.4349	31.5252		20.6269	16.5842	41.8327	39.2276	29.5678
ENSMEUT00000003512	AASDHPPT		5.29902	5.64618	21.1502	19.2318	12.8318		6.42012	4.51651	23.0785	20.8093	13.7061
ENSMEUT00000006257	AASS		4.00886	10.962	75.8139	117.765	52.1374		6.21724	9.5958	69.0949	106.256	47.791
ENSMEUT00000007318	AATF		6.51584	9.78778	46.1483	35.5385	24.4976		11.1302	8.87646	44.7192	43.5926	27.0796
ENSMEUT00000004383	AATK		0.146898	0.286418	0.781902	0.472538	0.421939		0.455225	0.216615	1.07906	1.1258	0.719175
ENSMEUT00000000434	ABAT		0.343794	1.37846	3.5522	4.79063	2.51627		1.16835	2.14654	4.36538	7.77461	3.86372
ENSMEUT00000004723	ABCA1		2.94998	1.93961	95.4367	51.044	37.8426		3.12339	1.12019	108.684	63.5111	44.1097
ENSMEUT00000008357	ABCA12		0	0.00642479	0.0257739	0.0253591	0.0143894		0	0.00312762	0.0260197	0.0398448	0.017248
ENSMEUT00000007942	ABCA2		9.54134	13.0802	27.8758	22.6651	18.2906		12.8422	9.81179	24.8265	27.7397	18.805
ENSMEUT00000007169	ABCA4		0.0787081	0.0638443	0.115084	0.114428	0.0930161		0.0496547	0.0650496	0.231501	0.249962	0.149042
ENSMEUT00000013253	ABCA5		0.461963	0.526331	9.40133	11.4716	5.46531		0.921717	0.909674	19.121	22.5355	10.872
ENSMEUT00000000370	ABCA7		1.2725	1.00075	0.863976	0.607429	0.936164		1.72015	1.60741	1.18103	1.18612	1.42368
ENSMEUT00000009498	ABCB1		21.2443	17.7054	31.2712	29.8462	25.0168		26.4287	22.2806	45.3738	39.2612	33.3361
ENSMEUT00000006638	ABCB11		0.399976	0.344047	2.39685	1.79047	1.23284		0.47043	0.216818	1.85791	1.71506	1.06505
ENSMEUT00000008122	ABCB4		0.639249	1.01102	2.6679	2.38023	1.6746		1.75006	1.40391	5.09341	3.53664	2.946
ENSMEUT00000006333	ABCB6		48.3798	29.5669	35.2479	24.2583	34.3632		33.3255	28.6819	24.6548	23.1766	27.4597
ENSMEUT00000005622	ABCB7		15.5909	14.3262	60.7471	57.3556	37.005		16.8264	12.1896	56.7074	57.4256	35.7873
ENSMEUT00000008341	ABCB8		12.3649	28.0931	21.9735	39.9118	25.5858		15.2266	27.516	18.4257	38.7176	24.9715
ENSMEUT00000007713	ABCB9		0.99687	1.16147	1.40245	1.23144	1.19806		1.78112	1.98276	1.91573	1.81579	1.87385
ENSMEUT00000001235	ABCC1		53.4344	67.2764	290.812	258.195	167.429		58.2759	43.9157	215.612	220.53	134.583
ENSMEUT00000014117	ABCC10		4.80756	3.63945	9.20499	4.78125	5.60831		6.2981	3.74908	6.85328	5.76059	5.66526
ENSMEUT00000000621	ABCC11		0.639233	31.0178	2.40683	124.326	39.5975		0.535519	17.6048	1.48937	72.396	23.0064
ENSMEUT00000011678	ABCC12		0	0.00626626	0.049299	0.0485121	0.0260193		0	0	0.0248669	0.0507534	0.0189051
ENSMEUT00000002619	ABCC5		13.347	12.886	20.3623	17.2496	15.9612		16.753	13.3425	23.841	25.0638	19.7501
ENSMEUT00000008905	ABCC9		5.32658	5.392	38.5451	32.5369	20.4501		5.57971	6.11652	48.7615	50.4921	27.7375
ENSMEUT00000015242	ABCD1		4.05606	6.83941	7.30236	7.40459	6.4006		5.23452	6.2974	6.74221	9.42858	6.92568
ENSMEUT00000007588	ABCD2		0.501075	0.414473	2.11441	2.01685	1.2617		0.572157	0.250151	2.93662	2.93849	1.67435
ENSMEUT00000006848	ABCD3		22.3288	28.5006	87.6245	111.45	62.476		29.4409	28.4408	91.7586	97.6596	61.825
ENSMEUT00000001759	ABCD4		8.9095	9.1733	24.4836	21.2908	15.9643		11.8727	10.7157	28.2191	25.9898	19.1993
ENSMEUT00000006989	ABCE1		31.2372	38.162	92.8331	111.347	68.3948		37.9326	40.196	91.6092	99.2313	67.2423
ENSMEUT00000010656	ABCF1		20.53	30.3103	37.0078	45.6528	33.3752		25.6445	31.6566	36.6613	49.0976	35.765
ENSMEUT00000003062	ABCF2		8.13702	20.8602	14.7828	38.1684	20.4871		10.7167	24.8667	17.2955	37.2167	22.5239
ENSMEUT00000002583	ABCF3		11.5287	16.563	21.7349	25.2551	18.7704		14.8796	18.2242	22.5591	30.8055	21.6171
ENSMEUT00000012324	ABCG1		0.962071	1.14379	18.0767	15.4223	8.90122		2.78385	1.73843	33.9604	23.0913	15.3935
ENSMEUT00000010221	ABCG2		8.30008	7.70241	11.2314	11.0665	9.5751		11.0906	9.49273	17.8569	16.4412	13.7204
ENSMEUT00000000344	ABCG4		5.00841	11.9311	4.32611	6.89733	7.04074		5.13854	12.4264	3.19873	8.14256	7.22656
ENSMEUT00000000893	ABCG5		0.114171	0.134622	1.49431	2.0334	0.944126		0.254777	0.0522884	1.14538	2.02184	0.868571
ENSMEUT00000004427	ABCG8		0.0138209	0.0129816	0.0994531	0.246471	0.0931817		0.0819766	0.0377895	0.200433	0.306986	0.156796
ENSMEUT00000011322	ABHD1		55.1627	61.5453	56.9843	58.5977	58.0725		51.4709	49.8943	47.3674	56.3826	51.2788
ENSMEUT00000013356	ABHD10		19.908	23.0661	46.8102	48.0423	34.4566		23.5879	23.4439	47.4742	45.6912	35.0493
ENSMEUT00000003652	ABHD12		3.31511	5.17264	12.0951	13.3528	8.48391		5.89199	6.39533	15.7252	13.2411	10.3134
ENSMEUT00000007678	ABHD14A		109.12	105.305	61.5002	49.8748	81.45		100.126	101.74	52.2796	55.646	77.4479
ENSMEUT00000006946	ABHD14B		107.877	109.754	59.8287	53.8514	82.8278		121.114	109.069	49.5242	60.0051	84.9281
ENSMEUT00000003524	ABHD15		0.393771	0.574235	1.27519	1.11724	0.840109		0.814183	0.602173	1.94596	1.70312	1.26636
ENSMEUT00000014173	ABHD16A		104.691	87.7816	109.26	84.7341	96.6167		120.673	90.2397	106.796	95.3874	103.274
ENSMEUT00000013633	ABHD16B		0.066497	0.227244	0.303243	0.153323	0.187577		0.0656255	0.140135	0.0761879	0.46641	0.18709
ENSMEUT00000003264	ABHD18		21.7534	21.838	104.529	110.662	64.6956		22.8081	19.4369	89.7291	98.7328	57.6767
ENSMEUT00000010986	ABHD2		1.44965	1.95435	24.6849	28.4082	14.1243		2.30913	1.54856	31.0936	32.3739	16.8313
ENSMEUT00000012429	ABHD3		6.27416	8.83589	15.2178	18.9971	12.3312		10.2938	10.1628	13.226	19.0136	13.1741
ENSMEUT00000012341	ABHD6		24.1946	48.5373	36.0899	81.8517	47.6684		21.7882	36.1591	27.5925	59.2902	36.2075
ENSMEUT00000001977	ABHD8		1.00389	1.36869	1.46791	1.14109	1.2454		2.49924	3.23275	2.40961	2.404	2.6364
ENSMEUT00000002599	ABI1		14.5101	19.2308	73.5	71.0985	44.5849		21.359	20.1014	76.4468	65.7735	45.9202
ENSMEUT00000000119	ABI2		1.29763	1.84439	13.6672	12.6962	7.37636		2.01113	1.49028	20.7237	18.1248	10.5875
ENSMEUT00000008494	ABI3		2.6639	3.15071	1.18622	2.56281	2.39091		5.14463	5.03977	3.15603	3.06015	4.10014
ENSMEUT00000015467	ABI3BP		0.86112	3.73861	3.36494	6.34331	3.577		1.59189	3.95829	5.75388	8.13779	4.86046
ENSMEUT00000000801	ABL1		5.37009	7.13237	34.9397	29.513	19.2388		10.1804	6.09863	38.5972	33.0793	21.9889
ENSMEUT00000006690	ABL2		1.59246	1.72904	2.53866e-06	1.37885	1.17509		1.4126	0.826126	0.000271843	0.00118242	0.560045
ENSMEUT00000006699	ABL2		0.860889	1.05716	23.7292	23.3476	12.2487		0.506698	0.644103	23.1239	29.1123	13.3468
ENSMEUT00000013579	ABLIM1		1.17971	0.649804	27.0743	26.8967	13.9501		0.881181	0.207116	27.8131	27.1616	14.0157
ENSMEUT00000007627	ABLIM2		2.65708	4.66222	6.39506	13.447	6.79034		2.33166	4.25193	7.31892	11.1318	6.25858
ENSMEUT00000004663	ABLIM3		2.03633	1.68263	5.63754	2.67662	3.00828		2.52286	1.65079	4.5791	3.34117	3.02348
ENSMEUT00000014035	ABR		7.0626	9.05705	21.3943	18.7551	14.0673		12.7062	10.9667	26.7271	26.9569	19.3392
ENSMEUT00000009901	ABRA		0.143963	0.157751	0.337215	0.247339	0.221567		0.332902	0.328257	0.338901	0.604602	0.401165
ENSMEUT00000005168	ABTB1		77.8747	42.8751	79.7146	39.6777	60.0355		77.9502	42.4218	69.5191	45.2449	58.784
ENSMEUT00000009086	ABTB2		0.76615	0.796088	0.629487	0.96709	0.789704		1.31246	0.890068	1.93309	1.39448	1.38252
ENSMEUT00000014543	ACAA1		159.504	134.458	93.0855	69.4895	114.134		166.822	137.496	75.3611	84.5342	116.053
ENSMEUT00000003231	ACAA2		100.981	76.051	151.347	108.471	109.213		140.928	92.3089	181.883	123.477	134.649
ENSMEUT00000005015	ACACA		1.78153	3.31903	18.8883	24.004	11.9982		2.48359	1.82047	19.3019	26.3702	12.494
ENSMEUT00000016004	ACACB		1.73866	1.76715	8.06966	5.29955	4.21875		2.64897	1.79271	8.24131	6.36941	4.7631
ENSMEUT00000008409	ACAD10		16.73	12.9074	28.499	22.456	20.1481		17.5919	13.3608	26.972	22.5906	20.1288
ENSMEUT00000008333	ACAD8		39.6252	83.7068	61.5217	111.491	74.0862		42.2236	75.0649	62.8967	104.3	71.1213
ENSMEUT00000012199	ACAD9		15.0001	16.2763	25.3607	28.4287	21.2664		15.5718	18.7264	22.8366	32.7539	22.4722
ENSMEUT00000002837	ACADL		16.0562	22.4941	26.2706	50.3134	28.7836		15.2394	23.7342	30.1866	46.9081	29.0171
ENSMEUT00000006252	ACADS		90.8657	112.105	82.3989	87.6589	93.2571		84.1373	102.282	56.373	82.4127	81.3012
ENSMEUT00000010689	ACADSB		123.366	108.145	258.982	245.023	183.879		133.135	100.821	249.474	182.508	166.484
ENSMEUT00000012759	ACADVL		53.1241	39.1596	51.9941	31.7538	44.0079		60.5707	43.4497	51.0145	42.0002	49.2588
ENSMEUT00000013782	ACAN		0.00741574	0.00694606	0.0130855	0.0260707	0.0133795		0.00731453	0.0235396	0.0395495	0.0404839	0.0277219
ENSMEUT00000003627	ACAP1		37.3401	20.3677	18.5984	11.6948	22.0003		29.5705	26.0308	18.5679	17.0707	22.81
ENSMEUT00000005612	ACAP2		13.8282	20.1449	80.1255	91.4179	51.3791		18.2347	15.453	71.4425	92.3703	49.3751
ENSMEUT00000010135	ACAP3		5.31457	5.32356	13.9897	10.0442	8.66801		7.62289	5.72098	14.1284	13.3989	10.2178
ENSMEUT00000008040	ACAT1		35.4444	63.9646	54.4108	116.485	67.5762		41.2376	70.9404	56.8367	96.9652	66.495
ENSMEUT00000005975	ACAT2		75.004	126.911	113.438	174.889	122.561		90.0239	125.152	114.645	157.889	121.927
ENSMEUT00000011607	ACBD3		11.8797	18.2674	75.0744	76.1106	45.333		18.8622	17.4337	80.9166	79.0569	49.0674
ENSMEUT00000012744	ACBD4		30.584	32.7791	42.5682	36.0788	35.5025		35.0113	32.9954	36.4943	38.3963	35.7243
ENSMEUT00000016073	ACBD5		16.6659	23.0082	84.5478	95.5164	54.9346		20.685	20.9964	76.3276	85.7675	50.9441
ENSMEUT00000007010	ACBD6		8.3252	11.5853	89.7604	94.2586	50.9824		12.543	10.4045	103.678	97.6123	56.0594
ENSMEUT00000009002	ACBD7		0.750965	0.233717	0	1.66349	0.662043		0.497571	0.911219	0.862539	0	0.567832
ENSMEUT00000014747	ACCS		3.06848	3.15541	3.06551	2.49766	2.94677		4.24878	4.07261	3.9419	4.02936	4.07316
ENSMEUT00000006694	ACE2		0.499918	0.843392	1.12404	1.84608	1.07836		1.03709	0.654944	2.53858	2.37139	1.6505
ENSMEUT00000008335	ACER1		0	0	0	0	0		0	0	0	0	0
ENSMEUT00000015178	ACER3		1.95734	3.7143	10.2724	17.2377	8.29543		2.88617	4.83167	19.5441	20.3328	11.8987
ENSMEUT00000005506	ACHE		0.108187	0.318385	1.19374	0.783705	0.601004		0.351916	0.364245	1.87382	1.60086	1.04771
ENSMEUT00000015267	ACIN1		79.8073	66.1742	114.895	85.666	86.6356		80.2625	68.6078	103.887	103.154	88.9778
ENSMEUT00000008252	ACKR3		19.415	24.0533	28.506	27.4398	24.8535		34.8004	29.0243	50.3428	36.1676	37.5838
ENSMEUT00000003569	ACKR4		0.0293468	0.0276305	14.7178	8.40535	5.79503		0.145097	0.134302	11.7332	8.32095	5.08339
ENSMEUT00000010822	ACLY		29.5413	45.2831	85.1304	110.987	67.7354		35.8893	43.5132	73.0947	98.4355	62.7332
ENSMEUT00000009444	ACMSD		0	0	0.114957	0.114247	0.057301		0.637301	0	0	0.118499	0.18895
ENSMEUT00000014807	ACO1		10.9807	11.0971	37.6092	31.0602	22.6868		18.8692	12.6984	41.4331	33.1765	26.5443
ENSMEUT00000002034	ACO2		104.964	105.36	137.521	108.994	114.21		114.173	108.502	117.51	117.894	114.52
ENSMEUT00000011652	ACOD1		0.0391061	0.0548642	2.56493	1.52075	1.04491		0.135396	0.0532546	2.72352	3.14732	1.51487
ENSMEUT00000002834	ACOT11		1.53071	3.12256	1.70569	3.26097	2.40498		3.20728	3.61002	3.69973	6.41082	4.23196
ENSMEUT00000014500	ACOT12		0.0203533	0.190876	0.217128	0.646851	0.268802		0.202098	0.0739946	0.291628	0.446408	0.253532
ENSMEUT00000007220	ACOT8		34.3111	33.6844	32.2441	26.5322	31.6929		36.1747	38.9745	26.926	31.9237	33.4997
ENSMEUT00000013927	ACOT9		34.5085	26.2568	59.9883	46.3133	41.7667		36.4934	27.9449	57.0883	37.0167	39.6358
ENSMEUT00000001772	ACOX1		19.683	22.331	84.5474	69.4104	48.9929		26.1018	21.2109	78.3184	72.5812	49.5531
ENSMEUT00000001666	ACOX2		5.81347	7.12207	22.5214	23.0857	14.6357		7.61822	6.14724	18.8161	19.6249	13.0516
ENSMEUT00000001093	ACOX3		6.47968	12.8363	43.5149	76.9292	34.94		7.27649	11.5836	39.9767	73.092	32.9822
ENSMEUT00000008133	ACOXL		0.411883	0.434468	5.31346	5.67376	2.95839		0.289588	0.39122	4.21474	3.938	2.20839
ENSMEUT00000010762	ACP1		48.1663	60.0395	129.86	181.195	104.815		55.7025	67.4357	161.996	152.238	109.343
ENSMEUT00000009166	ACP2		49.169	54.3371	43.0378	44.3649	47.7272		54.6993	52.801	49.3856	55.3497	53.0589
ENSMEUT00000012129	ACP5		14.0193	10.3971	18.5698	10.3533	13.3349		22.1204	10.4776	23.663	11.9428	17.051
ENSMEUT00000015078	ACP6		38.8155	43.6873	42.8317	46.7091	43.0109		34.4938	37.2927	37.5878	45.4077	38.6955
ENSMEUT00000005705	ACP7		0.545444	0.717687	0.594413	1.2785	0.784011		0.466112	1.03067	0.513169	0.348821	0.589693
ENSMEUT00000014207	ACPP		17.9857	18.0253	115.822	86.6831	59.629		23.9632	15.7676	103.737	80.1209	55.8972
ENSMEUT00000008554	ACPT		54.0527	57.5592	24.0378	23.0836	39.6833		46.8457	67.2058	19.7894	32.0968	41.4844
ENSMEUT00000010782	ACRBP		9.5343	8.72261	7.43725	4.9172	7.65284		11.9295	8.98685	5.14867	5.76779	7.9582
ENSMEUT00000009704	ACSBG1		1.70178	4.36527	4.76231	11.287	5.52909		3.48337	5.84821	10.1259	13.7378	8.29882
ENSMEUT00000004128	ACSBG2		16.4988	12.691	75.5664	46.3012	37.7644		22.9564	13.4459	79.2002	48.186	40.9471
ENSMEUT00000006146	ACSF2		111.687	101.282	130.147	123.985	116.775		109.723	94.2846	121.692	109.177	108.719
ENSMEUT00000011570	ACSF3		7.70352	8.71449	19.9906	17.2697	13.4196		9.03862	8.0724	19.9484	18.3479	13.8518
ENSMEUT00000003468	ACSL1		25.9268	38.9464	89.3878	131.085	71.3365		25.9958	30.4836	72.2318	100.108	57.2048
ENSMEUT00000010489	ACSL3		7.64487	10.553	100.919	116.332	58.8622		8.59738	6.57984	91.467	100.483	51.7818
ENSMEUT00000010381	ACSL4		3.67014	5.2728	27.4446	30.0295	16.6043		5.64407	5.12871	34.386	35.5094	20.167
ENSMEUT00000005116	ACSL5		4.06905	4.47824	8.91724	10.3371	6.95041		6.24276	6.07576	10.912	11.9169	8.78685
ENSMEUT00000001949	ACSM1		0.123562	0.086952	0.32585	0.109101	0.161366		0.888618	0.0840155	0.109161	0	0.270449
ENSMEUT00000011154	ACSM3		1.17901	1.84717	2.17669	1.72621	1.73227		1.79667	1.13925	2.13648	1.49464	1.64176
ENSMEUT00000008079	ACSM4		0.108663	0.0203254	0.228164	0.150354	0.126877		0	0.0791894	0.306121	0.390546	0.193964
ENSMEUT00000001269	ACSS1		7.90623	7.6616	34.3413	31.8052	20.4286		10.3146	6.69478	40.2647	26.1436	20.8544
ENSMEUT00000011551	ACSS2		29.2175	30.1016	30.5525	28.4764	29.587		31.4304	29.5934	28.4392	27.8593	29.3306
ENSMEUT00000002546	ACSS3		7.50352	6.66452	42.0827	24.8645	20.2788		13.9081	6.63366	48.5167	33.613	25.6679
ENSMEUT00000010863	ACTA2		108.642	280.792	87.0671	222.602	174.776		298.951	637.472	250.96	414.053	400.359
ENSMEUT00000005786	ACTC1		1.16877	2.22051	0.790778	1.23502	1.35377		0.91206	1.19683	0.88431	0.996578	0.997445
ENSMEUT00000016287	ACTG1		885.23	1100.16	2195.89	1995.05	1544.08		1352.32	1297.85	2405.8	2281.46	1834.36
ENSMEUT00000007068	ACTL10		0	0	0.145237	0.147299	0.073134		0	0	0.437817	0.449006	0.221706
ENSMEUT00000012670	ACTL6A		40.1403	47.2273	58.4531	58.9172	51.1845		51.2006	52.3738	59.4541	62.0782	56.2767
ENSMEUT00000016440	ACTL6B		0.0219703	0.102418	0	0	0.0310971		0.0651146	0.0989997	0.0740599	0.1516	0.0974436
ENSMEUT00000013682	ACTN1		35.7976	57.8743	114.757	124.664	83.2732		53.3033	74.6978	110.69	141.906	95.1493
ENSMEUT00000002462	ACTN2		1.15104	0.436242	4.30843	2.6113	2.12675		0.907042	0.521255	2.77606	2.64897	1.71333
ENSMEUT00000007209	ACTN4		31.2623	50.2504	81.3516	78.2403	60.2762		51.0117	58.9496	65.0978	82.3712	64.3576
ENSMEUT00000009396	ACTR1A		37.2942	50.4978	87.9751	96.4456	68.0532		54.4513	55.2965	84.5163	94.5872	72.2128
ENSMEUT00000005873	ACTR1B		6.51572	14.7259	12.0418	19.2983	13.1454		9.81708	15.8138	14.2225	21.3	15.2883
ENSMEUT00000015254	ACTR2		24.6018	35.9927	111.772	133.064	76.3576		35.9564	33.4801	117.438	116.861	75.9339
ENSMEUT00000016040	ACTR3		41.5015	53.4898	105.167	126.781	81.7348		55.9125	54.7257	126.958	109.347	86.7358
ENSMEUT00000006119	ACTR5		13.5155	13.56	26.1299	29.6046	20.7025		13.9207	14.2792	26.7255	30.2418	21.2918
ENSMEUT00000001847	ACTR6		7.7274	7.0213	17.3825	15.8209	11.988		8.91253	8.575	23.2424	18.8816	14.9029
ENSMEUT00000008231	ACTR8		11.2613	14.2357	17.1133	18.325	15.2338		13.3614	16.2537	15.7578	21.3823	16.6888
ENSMEUT00000007097	ACVR1		5.13702	7.12062	17.0818	16.1457	11.3713		8.56731	7.74262	18.6815	18.0836	13.2688
ENSMEUT00000015365	ACVR1B		10.0068	17.7664	38.4806	37.4673	25.9303		16.1702	15.893	34.5463	45.9863	28.1489
ENSMEUT00000000730	ACVR1C		0.0419578	0	5.48148	3.4526	2.24401		0.0415057	0.0384655	5.65174	3.78176	2.37837
ENSMEUT00000008979	ACVR2A		6.55635	6.55405	20.5652	16.0912	12.4417		9.1673	6.39292	18.3225	17.3235	12.8016
ENSMEUT00000016809	ACVR2B		0.90423	1.12415	13.9261	9.88016	6.45866		0.92871	1.0714	12.6703	12.0028	6.6683
ENSMEUT00000000143	ACVRL1		6.43582	13.3325	10.397	11.6891	10.4636		11.2848	17.6915	16.8638	17.9341	15.9436
ENSMEUT00000003043	ACYP1		98.8153	107.302	70.7784	75.2076	88.0258		86.7874	118.238	74.7051	95.8588	93.8973
ENSMEUT00000009126	ADA		3.00142	6.18407	4.55703	6.91639	5.16473		6.92978	9.36677	8.21573	8.70605	8.30458
ENSMEUT00000008891	ADA2		0.336748	0.281246	1.53165	1.12313	0.818194		0.742649	0.749522	3.21009	1.71647	1.60468
ENSMEUT00000009397	ADAD1		0.210099	0.182301	0.970933	1.14155	0.626221		0.224516	0.132875	1.4109	1.18755	0.73896
ENSMEUT00000014477	ADAM10		13.4557	17.1845	86.374	76.1807	48.2987		18.6961	12.9601	83.4264	74.9787	47.5153
ENSMEUT00000008753	ADAM11		0.757845	0.163824	1.53267	0.988615	0.860739		0.588397	0.285045	0.629557	1.04825	0.637812
ENSMEUT00000010664	ADAM12		0.29508	0.668437	6.20842	6.59392	3.44146		0.665472	0.424765	11.6472	8.42737	5.2912
ENSMEUT00000004372	ADAM15		26.2898	32.0089	20.2606	19.5332	24.5231		34.6153	41.1592	20.8181	25.2564	30.4622
ENSMEUT00000006188	ADAM17		7.67292	12.0435	28.2694	32.0654	20.0128		11.1895	12.4713	29.4318	33.7373	21.7075
ENSMEUT00000006360	ADAM19		0.0379351	0.0532617	0.0644304	0.0968734	0.0631251		0.0562711	0.068559	0.194002	0.430394	0.187307
ENSMEUT00000000949	ADAM22		0.696031	0.703916	8.32422	7.17043	4.22365		1.80393	1.16134	17.8885	11.7434	8.14929
ENSMEUT00000002229	ADAM23		0.0531237	0.0498974	0.855966	0.425767	0.346189		0.304792	0.203416	0.823827	0.801795	0.533457
ENSMEUT00000015590	ADAM33		3.53883	4.71639	2.7187	2.24583	3.30494		11.7843	9.80424	6.06498	5.65302	8.32663
ENSMEUT00000008208	ADAM7		0	0.0110984	0	0.0419004	0.0132497		0	0.0107315	0	0.0433763	0.0135269
ENSMEUT00000008612	ADAM8		1.30546	0.509497	1.44852	0.583437	0.961728		2.0539	0.623298	2.71321	1.24351	1.65848
ENSMEUT00000004676	ADAM9		16.8218	20.8852	88.6629	83.6699	52.51		21.0389	18.1548	81.0306	74.6901	48.7286
ENSMEUT00000014641	ADAMDEC1		9.27232	9.38656	9.05373	8.41684	9.03236		19.8682	14.0213	22.3889	12.8984	17.2942
ENSMEUT00000002401	ADAMTS1		1.93983	3.769	7.12954	8.00258	5.21024		4.07177	4.02795	13.4625	12.2227	8.44623
ENSMEUT00000007421	ADAMTS10		20.9038	36.4138	22.7385	30.8979	27.7385		35.7584	47.9482	34.0003	49.438	41.7862
ENSMEUT00000002306	ADAMTS12		0.0209021	0.0588202	0.423689	0.732022	0.308858		0.077609	0.0900604	0.74186	1.13554	0.511267
ENSMEUT00000002917	ADAMTS13		0.23737	0.416284	0.458334	0.644824	0.439203		0.668631	0.63386	1.25535	1.17953	0.934343
ENSMEUT00000008228	ADAMTS14		0.248683	0.0872068	1.79924	0.422283	0.639353		0.107608	0.0280373	0.836486	0.751922	0.431013
ENSMEUT00000015346	ADAMTS15		1.54504	2.74772	7.27974	7.74264	4.82878		5.77925	3.34917	15.1604	10.1016	8.5976
ENSMEUT00000003854	ADAMTS16		1.49925	0.58405	7.59064	1.89794	2.89297		1.08473	0.430682	6.62637	1.71819	2.46499
ENSMEUT00000014355	ADAMTS17		0.0160006	0.0150252	0.142721	0.312335	0.12152		0.00792345	0.00727537	0.229458	0.382296	0.156738
ENSMEUT00000012063	ADAMTS18		0.68622	2.39968	9.92331	26.0617	9.76773		1.03558	1.14376	10.795	28.9535	10.482
ENSMEUT00000004745	ADAMTS2		1.14484	2.42189	4.77615	6.73777	3.77016		2.57897	2.85238	9.90716	10.885	6.55588
ENSMEUT00000000776	ADAMTS3		0.242132	0.124129	1.85795	1.0233	0.811878		0.53763	0.219839	4.40858	2.37227	1.88458
ENSMEUT00000001628	ADAMTS4		0.279592	0.989924	0.526028	0.609716	0.601315		0.450014	0.881255	0.716688	0.617632	0.666397
ENSMEUT00000011806	ADAMTS5		0.598194	1.79785	14.0661	18.5815	8.76091		1.05557	1.20716	19.2074	17.774	9.81103
ENSMEUT00000007172	ADAMTS6		0.643664	1.7325	1.9288	7.53102	2.959		0.474701	0.502128	2.19856	3.84019	1.75389
ENSMEUT00000004572	ADAMTS7		0.32881	0.388195	0.66776	0.275942	0.415177		0.797776	0.725063	1.20136	0.463906	0.797026
ENSMEUT00000012688	ADAMTS8		7.19333	28.023	11.0102	31.8248	19.5128		16.3551	51.3259	19.715	51.1692	34.6413
ENSMEUT00000001426	ADAMTS9		2.24436	5.32866	12.6149	20.3527	10.1352		3.87897	4.18232	21.5625	27.0432	14.1667
ENSMEUT00000003121	ADAMTSL1		0.35955	0.225648	1.22541	1.13292	0.735882		0.761035	0.353893	2.93657	1.84134	1.47321
ENSMEUT00000010582	ADAMTSL3		0.135355	0.31312	1.00794	2.81241	1.06721		0.485183	0.973847	4.09094	8.36792	3.47947
ENSMEUT00000001090	ADAMTSL4		6.57788	6.01777	15.7171	14.4347	10.6869		9.68243	7.62116	17.613	21.0704	13.9967
ENSMEUT00000001213	ADAMTSL5		3.81624	3.60731	2.18849	2.40944	3.00537		7.67135	6.28927	3.3393	3.73008	5.2575
ENSMEUT00000009786	ADAP1		5.42228	7.81646	51.3115	41.8153	26.5914		10.0633	5.86198	48.9172	41.6255	26.617
ENSMEUT00000009537	ADAP2		1.24711	2.15239	3.53096	3.40172	2.58305		2.62381	2.04541	6.12864	4.98607	3.94598
ENSMEUT00000009426	ADARB1		0.209651	0.950922	1.61925	2.07868	1.21463		0.622991	0.761127	2.61211	4.20862	2.05121
ENSMEUT00000008841	ADARB2		0.0231069	0.0108514	0.124017	0.0819634	0.0599847		0.0229139	0.0210394	0.290681	0.424832	0.189867
ENSMEUT00000004835	ADAT1		11.0234	16.777	16.3871	24.5677	17.1888		9.74296	18.5072	15.2977	28.7773	18.0813
ENSMEUT00000003991	ADAT2		3.15728	4.18011	12.824	12.6131	8.19362		3.7304	4.37924	15.2645	14.8299	9.55101
ENSMEUT00000013445	ADCK1		1.30147	2.48969	3.85718	4.71013	3.08962		3.02178	2.80178	3.30986	4.2726	3.35151
ENSMEUT00000014535	ADCK2		9.24693	16.3602	18.6139	28.2833	18.1261		10.3804	16.7833	14.6717	32.2297	18.5163
ENSMEUT00000014955	ADCK5		34.5892	31.739	35.8672	33.2392	33.8586		33.1577	30.7129	36.1111	38.4738	34.6139
ENSMEUT00000008381	ADCY1		0	0	0.198816	0.140369	0.0847962		0	0.00710337	0.200171	0.321411	0.132171
ENSMEUT00000012105	ADCY10		0.017191	0.0323802	0.254432	0.523159	0.206791		0.0397098	0.0104688	0.299367	0.414995	0.191135
ENSMEUT00000016241	ADCY2		0.165403	0.155859	1.86801	1.02771	0.804245		0.516897	0.392524	3.36883	2.81719	1.77386
ENSMEUT00000010550	ADCY3		1.04429	1.5134	2.08312	2.02527	1.66652		3.09281	2.81369	5.54347	4.68636	4.03408
ENSMEUT00000014099	ADCY4		1.38282	2.00521	1.07322	1.12735	1.39715		2.10487	3.60023	1.53999	2.15748	2.35064
ENSMEUT00000008908	ADCY5		0.824018	3.10482	5.55078	8.65945	4.53477		2.59137	6.03788	9.81165	20.0138	9.61368
ENSMEUT00000013756	ADCY6		13.2703	18.148	54.0108	52.3062	34.4338		17.0985	11.163	44.8425	52.0852	31.2973
ENSMEUT00000002759	ADCY7		0.682709	1.47295	2.1007	3.96937	2.05643		0.853223	1.22077	2.28939	4.05856	2.10549
ENSMEUT00000000757	ADCY8		0.124036	0.180944	0.317801	0.462516	0.271324		0.266277	0.388487	1.13281	1.005	0.698144
ENSMEUT00000013501	ADCY9		0.350378	0.603799	6.92987	9.31634	4.3001		0.501071	0.533024	12.2894	13.5938	6.72932
ENSMEUT00000002310	ADCYAP1		0.0788776	0	0.566052	0	0.161232		0.15666	0.21645	0.286727	0.294484	0.23858
ENSMEUT00000008372	ADCYAP1R1		0.115987	0.794683	0.466529	1.40033	0.694382		0.363194	0.786848	0.673428	1.30466	0.782032
ENSMEUT00000008499	ADD1		18.805	29.2596	97.3247	111.583	64.2431		32.3577	31.1322	111.831	115.394	72.6787
ENSMEUT00000008344	ADD2		0	0	0	0.0551368	0.0137842		0.0155602	0.0142846	0.112068	0.171849	0.0784404
ENSMEUT00000001422	ADD3		29.7711	33.3467	175.714	136.056	93.7219		47.1477	31.5305	187.01	138.325	101.003
ENSMEUT00000012289	ADGRA2		7.99414	25.8939	15.5096	22.7674	18.0413		20.1658	35.8445	26.4911	38.0287	30.1325
ENSMEUT00000005287	ADGRA3		26.4333	28.4674	79.8332	82.5616	54.3239		28.6294	26.2754	82.8754	84.5942	55.5936
ENSMEUT00000016300	ADGRB1		0.129378	0.274373	0.134043	0.270057	0.201963		0.546064	0.657589	0.48896	0.688666	0.59532
ENSMEUT00000005194	ADGRB2		1.36416	2.41381	0.892496	1.188	1.46462		3.41204	3.80323	1.98793	2.40523	2.90211
ENSMEUT00000009301	ADGRB3		0.0293078	0	0.377215	0.132651	0.134793		0.0724663	0.0200392	0.678978	0.166347	0.234458
ENSMEUT00000012027	ADGRD1		1.8479	2.90036	16.7163	14.6352	9.02494		3.39212	3.89789	28.1147	26.3083	15.4283
ENSMEUT00000012446	ADGRD2		0	0.018271	0	0	0.00456775		0.019345	0.0353988	0.165045	0.101381	0.0802925
ENSMEUT00000012976	ADGRE1		0.18771	0.446157	0.92364	1.19852	0.689007		0.481901	0.412342	1.49493	1.15394	0.885778
ENSMEUT00000005446	ADGRE5		4.80039	8.35042	7.29789	8.63711	7.27145		9.68807	14.2756	12.11	16.8285	13.2255
ENSMEUT00000004941	ADGRF1		14.4002	43.3281	35.3127	106.728	49.9423		6.68629	30.3208	14.2065	70.0849	30.3246
ENSMEUT00000011785	ADGRF2		0	0	0.0960203	0.0473399	0.03584		0	0	0.145226	0.049416	0.0486605
ENSMEUT00000004901	ADGRF3		0.00809204	0	0.082909	0.110368	0.0503423		0.0239969	0.0146265	0.0276958	0.0853541	0.0379183
ENSMEUT00000016309	ADGRF4		0	0	0	0	0		0	0.0128398	0	0	0.00320995
ENSMEUT00000010770	ADGRG1		9.06365	10.9302	37.5477	25.9364	20.8695		16.3448	10.3408	38.7557	30.562	24.0008
ENSMEUT00000009981	ADGRG2		0.416822	0.566476	3.05294	1.81548	1.46293		0.796933	0.47592	4.00071	1.82414	1.77443
ENSMEUT00000000360	ADGRG5		0.0658504	0.0411186	0.15397	0.0765763	0.0843788		0.196106	0.0400215	0	0.238341	0.118617
ENSMEUT00000004492	ADGRG6		0.218208	0.0962218	1.86128	1.36662	0.885582		0.194892	0.187067	3.02875	2.40552	1.45406
ENSMEUT00000004569	ADGRG7		0.0365377	0.103349	0	0.323649	0.115884		0.0361361	0.055959	0.0475339	0.0484824	0.0470279
ENSMEUT00000013795	ADGRL1		5.14936	7.50605	8.06805	5.40282	6.53157		8.9345	9.24638	8.10294	8.93649	8.80508
ENSMEUT00000009739	ADGRL2		7.04002	5.19415	38.1719	22.8622	18.3171		11.4726	5.26525	52.3489	34.0487	25.7839
ENSMEUT00000006579	ADGRL3		3.99421	1.64444	39.1979	12.4643	14.3252		5.58732	1.97544	48.8191	18.5581	18.735
ENSMEUT00000001441	ADGRL4		3.23111	4.67077	10.3722	12.6303	7.72609		4.18216	4.81634	15.2864	14.8376	9.78063
ENSMEUT00000011410	ADGRV1		0.0479492	0.166421	1.47569	4.25997	1.48751		0.0827586	0.148913	1.88884	5.05368	1.79355
ENSMEUT00000002642	ADH5		50.7386	51.9161	74.9077	72.8825	62.6112		72.3899	57.0755	85.105	67.6204	70.5477
ENSMEUT00000000413	ADH7		0.663491	0.547234	1.01107	0.911095	0.783223		9.94495	0.79768	1.85334	1.1336	3.43239
ENSMEUT00000012405	ADHFE1		1.20193	0.765181	9.31779	4.52341	3.95208		1.87723	0.614544	10.2563	4.68831	4.3591
ENSMEUT00000008195	ADIPOQ		0.0944106	0.0440562	0.316178	0.317619	0.193066		0.0469161	0	0.158632	0.651398	0.214237
ENSMEUT00000015482	ADIPOR1		28.6692	38.1956	50.912	47.7107	41.3719		38.2634	42.3835	48.449	56.8023	46.4745
ENSMEUT00000014951	ADIPOR2		5.40223	12.5247	24.8545	37.3869	20.0421		8.72297	11.122	21.5701	34.8216	19.0592
ENSMEUT00000004746	ADK		5.19301	12.0566	12.5404	30.7653	15.1388		7.52184	12.6249	14.785	24.8918	14.9559
ENSMEUT00000013943	ADM		5.69055	21.7564	4.64393	14.6101	11.6752		11.4156	40.0139	9.45853	35.6733	24.1403
ENSMEUT00000007871	ADNP		16.9429	18.0725	84.6155	78.5373	49.5421		20.757	15.3433	80.1174	79.7368	48.9886
ENSMEUT00000007389	ADNP2		4.90705	5.8159	18.0861	19.7462	12.1388		6.66424	4.50686	16.539	19.1287	11.7097
ENSMEUT00000009175	ADORA1		2.13079	1.9147	1.50373	1.7102	1.81486		2.69446	2.645	1.81968	1.5548	2.17848
ENSMEUT00000012219	ADORA2A		0.493024	1.24535	0.321158	0.326607	0.596535		1.11603	1.8462	0.242737	0.741861	0.986707
ENSMEUT00000003500	ADORA2B		5.12031	5.10718	8.48486	9.66313	7.09387		7.45491	9.53419	9.06937	14.6942	10.1882
ENSMEUT00000014803	ADPGK		12.1826	19.0243	29.0716	34.0356	23.5785		18.2861	19.1455	32.5055	36.638	26.6438
ENSMEUT00000011527	ADPRH		80.1555	91.567	87.6068	98.2664	89.3989		96.9426	91.309	102.913	91.0216	95.5465
ENSMEUT00000014433	ADPRHL1		0.162858	0.178702	0	0.473723	0.203821		0.10747	0.123976	0.289632	0	0.130269
ENSMEUT00000000049	ADPRHL2		50.7097	51.2311	45.7499	35.5653	45.814		53.836	51.2567	40.3798	41.2603	46.6832
ENSMEUT00000003309	ADPRM		8.00289	14.7468	27.6868	37.9339	22.0926		8.94838	13.448	30.6323	34.91	21.9847
ENSMEUT00000002697	ADRA2C		16.7226	14.9459	13.5821	8.25141	13.3755		16.3804	9.81112	9.62094	9.03208	11.2111
ENSMEUT00000007651	ADRB2		1.35206	2.02947	6.0695	7.73624	4.29682		1.45418	2.23398	5.95381	8.86021	4.62555
ENSMEUT00000009152	ADRM1		48.2866	69.3131	54.0004	80.3597	62.99		49.9475	74.8711	59.8069	88.8641	68.3724
ENSMEUT00000006935	ADSS		26.6008	30.642	59.941	62.0019	44.7964		37.9615	33.487	75.4661	71.5529	54.6169
ENSMEUT00000002422	ADSSL1		0.0250107	0.0471312	0	0	0.0180355		0.0248373	0.114204	0.284138	0.0969212	0.130025
ENSMEUT00000013723	ADTRP		0.104799	0.247558	0.192603	0.376166	0.230282		0.313793	0.240426	0.773947	0.593992	0.48054
ENSMEUT00000012749	AEBP1		12.3889	22.7887	27.8375	25.3309	22.0865		30.0245	36.9307	37.195	36.405	35.1388
ENSMEUT00000010601	AEBP2		7.04473	10.3342	35.3346	36.1715	22.2213		10.8151	10.9853	35.262	37.635	23.6743
ENSMEUT00000005317	AEN		4.88655	8.94169	19.6975	26.2374	14.9408		5.80143	9.95139	16.0125	31.9288	15.9235
ENSMEUT00000005849	AFAP1		1.0559	0.763987	24.3585	21.1905	11.8422		0.781229	0.543027	33.0365	28.2083	15.6423
ENSMEUT00000009888	AFAP1L1		3.91846	3.97268	8.1478	5.14599	5.29623		5.97559	4.29492	12.9295	8.4638	7.91595
ENSMEUT00000009252	AFAP1L2		9.62571	12.7727	22.8813	26.1328	17.8531		12.1359	12.5622	24.8478	26.7388	19.0712
ENSMEUT00000015176	AFDN		12.4759	7.63717	134.499	84.4126	59.7562		12.9265	5.17845	124.564	76.0174	54.6716
ENSMEUT00000003092	AFF1		1.25045	0.948786	35.3275	29.143	16.6674		0.84382	0.419458	37.9044	31.5984	17.6915
ENSMEUT00000014664	AFF2		0	0.00652982	0.603467	1.02115	0.407787		0.0137326	0.0063322	1.11548	1.37245	0.626999
ENSMEUT00000013984	AFF3		1.99838	1.14819	49.8615	16.6265	17.4086		2.89946	1.21692	57.7388	24.0525	21.4769
ENSMEUT00000006646	AFF4		1.01939	0.736962	76.9139	81.6706	40.0852		0.701993	0.27084	71.8867	78.0026	37.7155
ENSMEUT00000014048	AFG1L		11.1908	8.30027	29.4098	23.3118	18.0532		9.73935	8.81627	26.7967	26.1732	17.8814
ENSMEUT00000012470	AFG3L2		17.7009	32.104	52.1891	103.74	51.4335		20.7248	29.3925	51.2312	93.0111	48.5899
ENSMEUT00000002785	AFMID		13.0077	9.73141	16.436	15.893	13.767		10.4075	8.46748	10.1393	12.0869	10.2753
ENSMEUT00000010054	AFP		0.029799	1.66551	0	2.77001	1.11633		0.0736346	1.06245	0.165319	0.616313	0.479429
ENSMEUT00000005588	AGA		16.7107	20.083	58.2974	64.0137	39.7762		22.6485	19.6453	65.3115	55.1604	40.6914
ENSMEUT00000011772	AGAP1		10.8144	12.3717	96.1617	69.0152	47.0907		13.6056	10.7879	94.5015	83.7525	50.6619
ENSMEUT00000014042	AGAP2		0.0525054	0.0489917	0.371681	0.0884994	0.140419		0.220559	0.10062	0.285992	0.112218	0.179847
ENSMEUT00000006970	AGBL1		0	0	0	0.035147	0.00878675		0.00971004	0.00895095	0	0.0366361	0.0138243
ENSMEUT00000004879	AGBL2		6.54044	10.9345	28.0437	42.3318	21.9626		7.82771	10.5935	30.7122	55.978	26.2779
ENSMEUT00000006571	AGBL4		0.957242	1.66733	2.40216	2.62497	1.91293		1.42513	1.94673	2.35212	3.70465	2.35716
ENSMEUT00000011270	AGBL5		40.077	36.6294	34.3674	26.3447	34.3546		41.5692	40.6615	28.9812	34.7145	36.4816
ENSMEUT00000015936	AGER		5.17975	5.46699	5.37729	5.15942	5.29586		5.31483	6.43159	5.53809	5.95925	5.81094
ENSMEUT00000006089	AGFG1		1.3244	2.00983	12.417	14.0539	7.45128		2.21719	2.05011	14.8768	15.3976	8.63543
ENSMEUT00000006382	AGFG2		7.34469	9.88648	25.2534	15.7292	14.5534		9.93027	9.45151	15.3389	17.7466	13.1168
ENSMEUT00000003707	AGGF1		21.0731	22.0281	69.5265	66.9829	44.9027		20.9826	20.5731	67.6881	63.8442	43.272
ENSMEUT00000009262	AGL		1.18222	1.42606	19.7888	29.2905	12.9219		0.979366	1.11821	16.8382	22.7481	10.421
ENSMEUT00000005467	AGMAT		0.0900666	0.0279809	0.304647	0.813723	0.309104		2.13216	0.0270723	0.510209	1.14978	0.954805
ENSMEUT00000000799	AGMO		0	0	0.235837	0.543405	0.19481		0.131493	0.0602982	0.475405	0	0.166799
ENSMEUT00000013471	AGO1		5.65692	10.9473	38.0717	42.1463	24.2056		9.45875	8.86182	35.2259	43.2947	24.2103
ENSMEUT00000001402	AGO2		0.190845	0.498423	32.0631	33.8719	16.6561		0.399485	0.523899	29.3157	40.9025	17.7854
ENSMEUT00000009232	AGO3		1.69797	1.88199	40.1901	48.2011	22.9928		1.92964	1.38734	41.2933	52.946	24.3891
ENSMEUT00000001029	AGO4		9.57218	9.11757	88.1933	57.7024	41.1464		11.7485	5.21711	71.9062	62.966	37.9595
ENSMEUT00000014001	AGPAT1		28.5845	41.7653	33.8818	25.951	32.5457		42.9744	50.4263	24.9768	35.5825	38.49
ENSMEUT00000011530	AGPAT3		8.90123	10.9188	32.8872	31.3647	21.018		11.2667	9.43819	34.8037	32.994	22.1256
ENSMEUT00000004336	AGPAT4		6.44878	15.9534	71.7388	92.9466	46.7719		6.08084	12.0125	55.3275	81.4724	38.7233
ENSMEUT00000013606	AGPAT5		2.7414	3.62157	24.7995	28.6838	14.9616		3.78727	3.53193	30.8017	33.4049	17.8815
ENSMEUT00000000623	AGPS		6.62866	9.27223	92.4719	113.283	55.4139		7.73762	6.98067	90.5945	98.7075	51.0051
ENSMEUT00000008399	AGRN		1.90162	2.96043	5.01026	2.85196	3.18107		4.74767	3.91095	7.28515	6.12727	5.51776
ENSMEUT00000014408	AGRP		1.37934	2.14746	1.53008	0.929352	1.49656		5.66718	38.8443	3.44647	14.6114	15.6423
ENSMEUT00000009042	AGTPBP1		5.40014	8.02261	30.8377	44.146	22.1016		5.8584	6.16941	32.7892	37.4344	20.5629
ENSMEUT00000009033	AGTR2		0.133708	1.68574	0	2.15357	0.993255		0.159065	0.537466	0.378373	0.775343	0.462562
ENSMEUT00000013979	AGXT		0.219295	0.205126	0.169061	0.335062	0.232136		2.84764	0.110342	0.508501	0.693108	1.0399
ENSMEUT00000009838	AGXT2		0.0212531	0.0399602	0.616972	1.06584	0.436006		0.968221	0	0.155026	0.556441	0.419922
ENSMEUT00000012555	AHCYL1		26.242	41.4167	86.9105	93.4256	61.9987		43.3211	40.6966	91.5509	95.9632	67.8829
ENSMEUT00000000054	AHCYL2		2.69658	5.64795	14.1078	19.8291	10.5704		4.61777	6.05269	10.9418	21.3728	10.7463
ENSMEUT00000000181	AHI1		1.85296	2.04034	21.9832	21.7509	11.9069		2.00709	2.1974	21.5852	22.8	12.1474
ENSMEUT00000009647	AHRR		0.0794594	0.0149453	0.471818	0.291261	0.214371		0.0945298	0.029043	0.834698	0.425613	0.345971
ENSMEUT00000010853	AHSA1		127.81	168.08	117.471	146.269	139.907		139.019	170.878	102.359	146.1	139.589
ENSMEUT00000009346	AHSG		0.700986	0.39363	0.286017	0.3851	0.441433		85.799	0.610201	0.573896	0.587598	21.8927
ENSMEUT00000006714	AHSP		0.337106	0	0.587269	0.579359	0.375934		0.837645	0.153603	0	0	0.247812
ENSMEUT00000006577	AICDA		0	0	0.212066	0.212303	0.106092		0.175356	0.0536336	0.214811	0.440893	0.221173
ENSMEUT00000010865	AIDA		5.95776	10.5505	40.5762	51.3688	27.1133		9.35224	7.90961	40.0564	49.5058	26.706
ENSMEUT00000016824	AIF1		11.5398	12.8908	16.0644	13.0804	13.3938		30.1521	19.9586	34.6725	17.1089	25.473
ENSMEUT00000013921	AIF1L		11.9128	16.5189	22.3979	25.7066	19.1341		14.8242	18.7321	36.4952	39.3144	27.3415
ENSMEUT00000006921	AIFM1		27.7558	28.8832	32.6568	28.5837	29.4699		35.3914	32.0806	33.4807	30.4474	32.85
ENSMEUT00000004758	AIFM2		6.18389	5.89864	19.8343	13.8034	11.4301		7.76417	5.82376	19.801	17.1902	12.6448
ENSMEUT00000005235	AIFM3		0.149022	0.516326	0.102799	0.461118	0.307316		0.309249	0.702876	0.362713	0.741974	0.529203
ENSMEUT00000002995	AIG1		34.4149	30.3541	37.1566	32.4334	33.5898		35.9502	29.0379	34.6003	28.4629	32.0128
ENSMEUT00000007118	AIMP1		101.122	75.8666	99.0221	93.8766	92.4718		96.4649	77.9218	93.796	85.1144	88.3243
ENSMEUT00000007093	AIMP2		47.5612	60.5266	60.3628	87.7238	64.0436		51.4675	61.9474	68.0547	83.3025	66.193
ENSMEUT00000003959	AIP		91.9193	90.393	47.2944	52.1884	70.4488		88.2399	106.226	49.8977	57.0347	75.3496
ENSMEUT00000000133	AIPL1		0.0293083	0.0274777	0	0	0.0141965		0	0.0531202	0	0	0.01328
ENSMEUT00000006308	AJAP1		0	0.022344	0.411778	0.164311	0.149608		0.0709744	0.19506	0.664333	0.595254	0.381405
ENSMEUT00000005343	AJUBA		3.77059	8.31429	4.63267	5.83446	5.638		6.77223	10.7074	6.63378	9.79272	8.47653
ENSMEUT00000008191	AK1		119.235	79.7949	57.1628	48.8216	76.2536		145.584	129.439	80.6033	66.7244	105.588
ENSMEUT00000014302	AK3		32.5256	49.946	219.752	226.654	132.219		55.6321	47.3127	224.794	243.557	142.824
ENSMEUT00000016686	AK4		1.84866	4.29413	1.96586	7.79768	3.97658		4.05858	3.3101	3.71936	6.83235	4.4801
ENSMEUT00000000461	AK5		0.107492	0.259911	0.645866	1.06778	0.520262		0.3803	0.335111	0.488463	1.71681	0.730171
ENSMEUT00000013832	AK7		9.10167	11.7315	18.974	30.3855	17.5482		10.4426	15.1127	23.5714	35.9636	21.2726
ENSMEUT00000004146	AK8		11.0968	16.9776	17.2135	26.8015	18.0223		13.0395	24.9365	19.2623	35.2332	23.1179
ENSMEUT00000003858	AKAP1		10.2564	18.753	38.6939	40.2591	26.9906		13.1004	17.4058	32.8229	42.1291	26.3646
ENSMEUT00000006953	AKAP13		4.35459	4.85614	190.767	262.577	115.639		2.40467	1.50992	189.981	283.801	119.424
ENSMEUT00000006895	AKAP17A		2.02022	2.59631	8.23817	8.01356	5.21706		3.61838	3.15282	9.45724	9.07009	6.32463
ENSMEUT00000006099	AKAP4		20.8736	39.875	21.7595	32.2402	28.6871		11.6077	32.6306	9.94201	28.6099	20.6976
ENSMEUT00000000470	AKAP6		0.278278	0.43626	1.64148	2.35098	1.17675		0.406928	0.739752	2.63842	4.84108	2.15654
ENSMEUT00000001171	AKAP7		4.76557	4.50121	20.3583	13.3494	10.7436		9.12686	6.03439	24.8364	15.5819	13.8949
ENSMEUT00000008622	AKAP8		42.9105	29.7201	54.2476	48.2679	43.7865		36.3005	30.1946	54.0187	46.17	41.671
ENSMEUT00000014221	AKAP8L		42.3301	35.1585	80.1434	60.0081	54.41		44.6822	33.1521	74.4357	57.435	52.4262
ENSMEUT00000005995	AKIRIN2		9.69732	15.471	16.1305	14.9273	14.0565		14.4502	18.1744	14.2321	22.8867	17.4359
ENSMEUT00000003445	AKR1B1		86.1196	112.836	92.2566	100.059	97.8178		129.551	145.272	111.743	119.928	126.623
ENSMEUT00000004154	AKR1E2		8.56658	4.68756	10.0804	9.9233	8.31446		9.83899	6.35436	14.6017	7.23244	9.50687
ENSMEUT00000009736	AKT1		57.5858	127.26	202.693	284.431	167.992		52.0116	114.182	91.3452	256.503	128.51
ENSMEUT00000005837	AKT1S1		91.9712	89.5034	45.7891	34.9429	65.5516		95.4777	92.0723	35.9487	44.4975	66.9991
ENSMEUT00000006336	AKT2		12.4906	19.192	40.1334	37.3051	27.2803		20.4264	20.2609	36.6652	43.6717	30.256
ENSMEUT00000011008	AKTIP		52.5556	45.7232	81.7849	75.7711	63.9587		58.0992	45.9237	88.5129	65.8353	64.5928
ENSMEUT00000008007	ALAD		4.31954	6.44907	6.00683	6.71455	5.8725		7.12474	6.27914	5.84238	6.95939	6.55141
ENSMEUT00000015260	ALAS1		95.6497	102.882	118.192	114.319	107.761		97.7492	105.752	93.0301	101.739	99.5676
ENSMEUT00000000334	ALAS2		0.244329	0.213434	0.741414	0.319661	0.37971		0.241703	0.146971	0.533495	0.272468	0.298659
ENSMEUT00000012244	ALCAM		20.691	58.5031	149.928	251.116	120.06		20.0268	50.1863	125.177	238.112	108.376
ENSMEUT00000003462	ALDH18A1		10.2925	11.9442	22.2821	19.4854	16.001		15.1861	13.0258	24.6642	20.6069	18.3708
ENSMEUT00000008870	ALDH1A1		28.5496	41.3011	30.554	45.545	36.4874		39.2763	41.3194	34.704	40.3447	38.9111
ENSMEUT00000002562	ALDH1A3		5.17889	8.8745	32.0362	30.6569	19.1866		10.199	9.79918	37.1748	40.8373	24.5026
ENSMEUT00000009317	ALDH1L1		6.40934	8.68912	36.8747	46.2784	24.5629		9.48961	5.89151	38.0673	35.0877	22.134
ENSMEUT00000003490	ALDH1L2		0.244143	0.803759	0.446761	2.96612	1.1152		0.54945	1.18643	1.24362	3.0022	1.49543
ENSMEUT00000007992	ALDH3A1		0.024518	0	0	0.0832403	0.0269396		0	0.0223219	0	0	0.00558047
ENSMEUT00000005745	ALDH3A2		10.9797	12.7972	36.3875	32.2018	23.0915		17.6519	13.9982	41.6788	35.6155	27.2361
ENSMEUT00000012087	ALDH4A1		33.136	33.9761	69.7003	54.7631	47.8939		50.2757	37.5392	66.8906	60.8237	53.8823
ENSMEUT00000014973	ALDH5A1		2.25437	2.16117	10.0322	9.08628	5.8835		2.36133	2.14321	8.30504	9.80976	5.65484
ENSMEUT00000016609	ALDH8A1		1.28049	0.656317	1.74236	1.2338	1.22824		2.52819	0.424155	2.11123	1.07724	1.5352
ENSMEUT00000010315	ALDH9A1		14.6751	20.9907	49.6113	53.9382	34.8038		21.1208	22.224	43.905	45.7956	33.2614
ENSMEUT00000006886	ALDOB		0.636829	1.04927	0.862673	0.771451	0.830056		15.5487	1.27018	1.12419	1.15181	4.77372
ENSMEUT00000000286	ALG11		18.1913	20.7904	29.0998	33.5672	25.4122		19.5472	21.7284	27.32	32.5642	25.2899
ENSMEUT00000000676	ALG12		62.1389	71.1035	35.821	40.0118	52.2688		66.9202	76.8002	35.3288	42.81	55.4648
ENSMEUT00000012593	ALG13		2.62431	2.80213	1.73627	2.42867	2.39784		2.70689	2.53312	1.9178	2.13271	2.32263
ENSMEUT00000001548	ALG14		8.52462	9.20123	16.4602	12.9661	11.788		11.3353	8.56433	15.0259	12.1925	11.7795
ENSMEUT00000015686	ALG3		37.1165	52.6164	16.0404	21.2328	31.7515		39.4782	57.118	16.5545	24.9558	34.5266
ENSMEUT00000008056	ALG5		55.4177	47.06	74.0892	71.4956	62.0156		55.4013	45.3589	72.9111	64.0558	59.4318
ENSMEUT00000014189	ALG6		18.0154	12.4767	29.1217	22.3625	20.4941		18.2122	11.3729	28.9269	23.781	20.5733
ENSMEUT00000001888	ALG8		21.1861	19.2802	47.1859	44.6729	33.0813		22.2753	18.4697	49.8849	40.3712	32.7503
ENSMEUT00000000894	ALK		0.153154	0.0835366	0.55156	0.372889	0.290285		0.214413	0.190311	0.755648	0.612287	0.443165
ENSMEUT00000002743	ALKAL2		1.23641	0.41809	6.13323	8.40632	4.04851		1.31118	0.324364	6.82744	8.93207	4.34876
ENSMEUT00000015045	ALKBH1		7.9544	9.43196	11.0065	15.321	10.9285		8.74496	9.85886	11.5848	15.0386	11.3068
ENSMEUT00000015826	ALKBH2		20.7715	9.86529	31.5185	13.863	19.0046		17.0317	10.1532	30.1482	16.9837	18.5792
ENSMEUT00000007621	ALKBH3		54.1683	41.2754	66.0506	59.9803	55.3687		49.0441	50.1652	74.8508	63.2169	59.3193
ENSMEUT00000012416	ALKBH4		19.3	22.5077	19.6724	24.2846	21.4412		18.4381	21.4677	17.989	27.208	21.2757
ENSMEUT00000010638	ALKBH5		14.9505	25.2429	68.8173	62.6863	42.9243		25.1522	26.8511	65.2114	75.3307	48.1363
ENSMEUT00000007270	ALKBH6		153.943	134.641	70.5748	58.2142	104.343		150.889	133.24	67.3315	58.9179	102.595
ENSMEUT00000006495	ALKBH7		38.8405	48.6673	17.5401	25.7981	32.7115		38.2835	53.1192	17.8555	27.6238	34.2205
ENSMEUT00000015301	ALKBH8		9.70831	9.25648	22.479	25.6251	16.7672		9.20663	9.45018	24.8462	23.9145	16.8544
ENSMEUT00000000343	ALOX12		7.24912	13.4904	8.92529	15.2071	11.218		8.01349	14.2986	8.29091	15.719	11.5805
ENSMEUT00000008343	ALOX12B		0.0385226	0.0721114	0.180497	0.270589	0.14043		0.114407	0.0930807	0.409969	0.325233	0.235672
ENSMEUT00000013140	ALOX15		6.46783	5.2869	8.96626	5.71853	6.60988		7.55847	6.02523	8.61854	8.87903	7.77032
ENSMEUT00000003667	ALOX5		0.388207	0.48934	0.712509	0.998337	0.647098		0.835351	0.912045	1.91115	1.86298	1.38038
ENSMEUT00000015419	ALOX5AP		2.62686	1.87105	4.77675	3.31213	3.1467		4.28588	2.29068	6.58667	2.04329	3.80163
ENSMEUT00000009222	ALOXE3		2.87397	1.59646	4.03459	2.16538	2.6676		3.39148	2.19576	4.93507	3.80004	3.58059
ENSMEUT00000004784	ALPK1		1.40902	0.673502	23.1812	9.28229	8.6365		1.30674	0.512043	24.4144	9.58312	8.95408
ENSMEUT00000012683	ALPK2		0.00407422	0.0077012	0.0616861	0.136087	0.0523871		0.0242407	0.0149247	0.140161	0.127064	0.0765976
ENSMEUT00000009857	ALPK3		1.41022	3.81862	3.21141	6.13723	3.64437		0.492518	1.83376	1.43552	4.18559	1.98685
ENSMEUT00000001841	ALPL		117.952	146.7	245.505	198.199	177.089		128.63	122.724	162.911	229.865	161.032
ENSMEUT00000003495	ALS2		2.81952	3.44772	9.72992	12.0966	7.02344		3.18944	3.0235	11.7254	15.1616	8.27499
ENSMEUT00000006724	ALS2CL		12.3937	13.4731	19.6026	21.0758	16.6363		16.3711	16.3456	22.9617	28.8424	21.1302
ENSMEUT00000010304	ALX1		0.274278	0.191827	0.485319	0.359176	0.32765		0.237198	0.187252	0.244925	0.374782	0.261039
ENSMEUT00000002213	ALYREF		95.5813	113.6	83.5953	101.868	98.6611		107.635	123.907	94.5874	98.7981	106.232
ENSMEUT00000002857	AMBN		0	0	0.147221	0	0.0368052		0	0	0	0	0
ENSMEUT00000004587	AMBP		0.649261	0.344585	0.14214	0.282099	0.354521		45.8801	0.558455	0	0.438426	11.7192
ENSMEUT00000006321	AMBRA1		39.6969	81.6913	64.7839	86.5735	68.1864		36.6845	67.8164	43.4677	90.2376	59.5516
ENSMEUT00000010659	AMD1		36.1275	76.9199	211.151	343.252	166.863		49.4131	70.481	184.91	281.742	146.637
ENSMEUT00000009784	AMDHD1		0	0	0	0	0		0.562805	0	0	0	0.140701
ENSMEUT00000013159	AMER2		0.0934775	0.122817	0.323633	0.0639219	0.150962		0.0741246	0.0679139	0.521794	0.19983	0.215916
ENSMEUT00000011452	AMER3		0	0	0.0813438	0	0.0203359		0	0	0.0408579	0	0.0102145
ENSMEUT00000000972	AMFR		16.5201	31.0559	48.2507	69.6387	41.3663		24.5641	31.1584	48.5528	65.4345	42.4274
ENSMEUT00000010859	AMH		0.679918	0.736107	1.02725	1.09492	0.884549		0.870941	0.819089	0.886333	0.605805	0.795542
ENSMEUT00000011666	AMHR2		0.0572231	0.173166	0.459154	0.0461834	0.183932		0.226381	0.179874	0.138292	0.611952	0.289125
ENSMEUT00000002312	AMIGO1		2.72787	2.16295	10.1841	3.91027	4.7463		4.27512	2.27282	8.34717	5.6363	5.13285
ENSMEUT00000009140	AMMECR1L		3.08191	5.66569	18.0671	17.8435	11.1646		4.40645	4.96561	19.7193	21.3396	12.6077
ENSMEUT00000016271	AMN1		3.57867	7.89518	9.94781	18.7929	10.0536		5.66753	8.19033	16.8599	18.0169	12.1837
ENSMEUT00000016214	AMOT		10.2082	10.6145	44.8328	21.0599	21.6788		20.7318	10.5945	36.183	32.283	24.9481
ENSMEUT00000003192	AMOTL1		0.538841	0.505034	6.64004	6.2132	3.47428		0.507863	0.154651	9.07653	9.93164	4.91767
ENSMEUT00000000664	AMPD1		0	0	0	0.1253	0.031325		0.0115708	0.0106475	0	0.0436093	0.0164569
ENSMEUT00000007811	AMPD2		18.5453	34.3406	20.2694	28.3209	25.3691		20.6576	34.8313	16.8157	33.1283	26.3582
ENSMEUT00000014585	AMPD3		6.57579	4.92293	28.3186	14.7695	13.6467		9.03976	5.09601	22.138	17.0911	13.3412
ENSMEUT00000006890	AMPH		2.76201	12.1288	3.0896	6.98829	6.24217		3.567	13.0996	2.38801	7.18434	6.55974
ENSMEUT00000012025	AMT		31.5637	41.7149	43.9965	42.3132	39.8971		36.5927	34.0666	35.0311	38.6733	36.0909
ENSMEUT00000003096	AMTN		0	0	0	0	0		0	0	0	0	0
ENSMEUT00000007596	AMZ1		0.220012	0.0685036	0.811713	0.558354	0.414646		0.2895	0.332163	1.06744	0.642216	0.58283
ENSMEUT00000016542	ANAPC10		13.4166	18.2612	138.193	129.136	74.7517		11.8103	17.8171	156.929	133.367	79.9809
ENSMEUT00000005794	ANAPC13		95.4692	116.832	161.251	144.693	129.561		117.957	111.067	152.221	155.6	134.211
ENSMEUT00000015355	ANAPC16		290.022	373.729	320.806	429.405	353.49		323.083	347.161	284.718	390.465	336.357
ENSMEUT00000010780	ANAPC2		14.1251	17.6255	32.2041	27.5831	22.8845		17.6389	16.2154	27.0836	30.9007	22.9596
ENSMEUT00000010434	ANAPC4		7.42965	4.6979	40.9955	38.2683	22.8478		7.9478	4.66816	42.9539	35.137	22.6767
ENSMEUT00000013646	ANAPC5		25.2502	28.7772	29.5339	29.749	28.3276		26.0841	30.72	29.2659	33.5899	29.915
ENSMEUT00000008440	ANAPC7		17.3753	18.0623	60.5798	52.8395	37.2142		20.0672	16.9559	61.2684	55.8535	38.5362
ENSMEUT00000000677	ANG		14.9926	11.2211	14.2448	6.88296	11.8354		70.8112	11.3423	15.4177	14.0066	27.8944
ENSMEUT00000015266	ANGEL1		12.3002	18.3627	32.8153	29.068	23.1365		20.7419	18.9737	30.8096	34.6341	26.2898
ENSMEUT00000008885	ANGEL2		11.0627	10.9349	25.5641	30.5974	19.5398		10.578	10.7537	27.6063	25.8479	18.6965
ENSMEUT00000002121	ANGPT1		0.134344	0.126558	0.146791	0.215103	0.155699		0.19059	0.193779	0.667979	0.227552	0.319975
ENSMEUT00000003897	ANGPT2		3.02087	5.27575	8.39765	8.63775	6.33301		4.73534	6.49267	9.49499	12.061	8.196
ENSMEUT00000003375	ANGPT4		0.255863	0.426247	1.58816	0.892354	0.790656		0.866051	0.643557	3.26287	3.53156	2.07601
ENSMEUT00000016046	ANGPTL1		0.735512	1.32425	6.27441	8.26714	4.15033		1.59129	2.13771	9.89795	11.6051	6.30801
ENSMEUT00000015671	ANGPTL2		2.49826	5.07116	13.1719	11.8038	8.13628		7.50539	5.25953	19.2789	16.9113	12.2388
ENSMEUT00000006734	ANGPTL3		0.143396	0.112384	8.88484	10.0145	4.78878		2.46717	0.152898	6.16271	10.8397	4.90562
ENSMEUT00000013178	ANGPTL4		2.20672	2.11232	2.34831	2.35372	2.25527		6.38205	2.68548	8.02031	3.44563	5.13337
ENSMEUT00000004423	ANGPTL5		0.991022	0.117138	3.53842	0.791161	1.35944		0.534595	0.152543	1.78792	0.832476	0.826883
ENSMEUT00000007972	ANGPTL6		16.9118	13.1241	9.12466	7.20346	11.591		13.8424	12.6672	7.50887	7.78764	10.4515
ENSMEUT00000010418	ANGPTL7		0.137615	0	3.66283	4.65485	2.11382		0.204986	0.628106	3.70602	5.0807	2.40495
ENSMEUT00000007507	ANGPTL8		0	0.516537	3.27112	2.75251	1.63504		0.0781698	0.360312	4.94108	1.69533	1.76872
ENSMEUT00000015867	ANK1		0.28638	0.345175	1.12718	1.36472	0.780864		0.420172	0.215995	1.26925	1.45382	0.839809
ENSMEUT00000008631	ANK2		2.30346	1.30587	39.8947	23.8177	16.8304		1.36999	0.68169	23.3433	17.9067	10.8254
ENSMEUT00000016627	ANK3		7.09085	8.03564	62.8608	52.6118	32.6498		7.57083	5.80644	47.4849	48.5601	27.3556
ENSMEUT00000012848	ANKAR		0.140628	0.0419705	0.799176	0.587278	0.392263		0.117502	0.115526	1.21039	1.02993	0.618337
ENSMEUT00000002365	ANKDD1A		3.41479	2.537	12.2273	4.72847	5.72689		4.00104	2.76142	9.5724	3.404	4.93471
ENSMEUT00000002378	ANKDD1B		0.237004	0.260022	1.77496	1.44943	0.930354		0.684638	0.506469	2.9869	2.66987	1.71197
ENSMEUT00000005096	ANKFN1		0.117831	0.110873	4.18864	8.61404	3.25785		0.0816482	0.0967752	4.91903	10.7463	3.96094
ENSMEUT00000002573	ANKFY1		8.23096	11.8532	36.5814	30.9477	21.9033		11.6699	11.4989	32.5923	36.3665	23.0319
ENSMEUT00000003767	ANKH		2.97281	2.62056	18.3651	10.6011	8.63989		4.94928	3.73555	24.3884	13.893	11.7416
ENSMEUT00000000700	ANKK1		0.683785	0.361148	2.42843	0.71022	1.0459		0.937708	0.248979	2.06351	0.654412	0.976152
ENSMEUT00000014785	ANKLE2		8.65919	10.4455	49.6385	55.4707	31.0535		10.3815	8.20591	49.7375	52.4451	30.1925
ENSMEUT00000000275	ANKMY1		1.89515	1.86586	5.10166	5.27584	3.53463		2.09131	2.11527	5.62458	7.18046	4.25291
ENSMEUT00000002323	ANKMY2		9.2023	16.5969	50.395	50.5236	31.6794		15.2397	16.0612	45.6087	57.4927	33.6006
ENSMEUT00000009096	ANKRA2		5.06497	5.32768	21.3333	15.5825	11.8271		5.65269	4.84097	23.4354	17.1542	12.7708
ENSMEUT00000001808	ANKRD10		59.6847	44.1159	101.91	92.2607	74.4928		53.8827	41.2691	102.968	102.001	75.0302
ENSMEUT00000002638	ANKRD12		1.58318	1.44967	48.2848	37.2781	22.1489		1.6723	1.09401	49.1822	40.0399	22.9971
ENSMEUT00000004802	ANKRD13A		26.304	27.2598	125.548	91.5839	67.6739		37.1482	21.0465	132.517	103.579	73.5727
ENSMEUT00000001663	ANKRD13B		0.642099	0.749376	0.715588	0.543553	0.662654		1.11193	0.832223	0.539673	0.689517	0.793336
ENSMEUT00000008000	ANKRD13C		18.8471	29.166	101.007	142.828	72.962		19.9691	24.7528	96.2256	130.043	67.7476
ENSMEUT00000002201	ANKRD13D		22.4859	23.1748	17.6627	17.6343	20.2394		20.3017	23.01	12.6466	20.4128	19.0928
ENSMEUT00000005209	ANKRD16		2.0966	3.48541	5.86628	9.96414	5.35311		2.23259	2.61165	6.41474	6.55811	4.45427
ENSMEUT00000015337	ANKRD17		7.30052	12.2304	41.2992	43.4282	26.0646		10.9829	10.4995	33.9385	46.5347	25.4889
ENSMEUT00000011846	ANKRD2		0.146943	0.0917475	0.752281	0.92038	0.477838		0.289978	0.487474	0.672882	1.55175	0.750521
ENSMEUT00000013433	ANKRD22		7.17631	13.9986	30.7633	45.9461	24.4711		8.08695	10.1603	18.0846	29.786	16.5295
ENSMEUT00000006094	ANKRD23		15.9579	11.8314	42.0014	30.5793	25.0925		16.1483	9.8996	34.7629	33.4128	23.5559
ENSMEUT00000002781	ANKRD27		12.1064	14.4315	56.2092	70.0843	38.2079		11.5346	10.9457	53.4389	59.7222	33.9103
ENSMEUT00000016420	ANKRD28		19.4401	20.538	95.2603	95.5867	57.7063		19.3757	15.8059	83.6783	82.5952	50.3638
ENSMEUT00000005877	ANKRD29		0.982707	0.881323	2.5497	1.57129	1.49626		1.90779	1.09996	3.43276	1.49731	1.98445
ENSMEUT00000013534	ANKRD33B		0.154747	0.273875	1.60265	3.69738	1.43216		0.290039	0.249075	2.9329	4.02181	1.87346
ENSMEUT00000015758	ANKRD34A		0.159999	0.193659	0	0.104793	0.114613		0.142252	0.258501	0.311786	0.212084	0.231156
ENSMEUT00000013487	ANKRD34B		1.16143	0.742451	6.87515	3.03742	2.95411		2.3843	0.168622	6.81124	1.91623	2.8201
ENSMEUT00000012632	ANKRD35		0.87329	1.15766	0.395703	0.693069	0.77993		1.15618	1.97039	0.610652	1.19254	1.23244
ENSMEUT00000010486	ANKRD37		42.798	33.654	31.3244	25.6481	33.3561		39.4649	28.906	36.779	22.1027	31.8132
ENSMEUT00000000785	ANKRD39		25.6411	36.6882	60.8466	64.3428	46.8797		31.8953	30.7869	53.8465	63.3934	44.9805
ENSMEUT00000012284	ANKRD42		11.9543	14.1294	21.2548	20.7492	17.0219		12.9847	16.5395	18.4977	27.7038	18.9314
ENSMEUT00000011069	ANKRD44		0.573384	0.174176	12.9656	7.45936	5.29313		0.433976	0.159685	15.8184	9.94546	6.58938
ENSMEUT00000003910	ANKRD45		1.47693	1.39641	2.61505	3.67309	2.29037		0.833892	1.03939	1.50971	2.32514	1.42703
ENSMEUT00000006444	ANKRD46		10.9825	17.3416	42.3211	45.527	29.0431		20.8556	20.0615	44.7488	48.8455	33.6278
ENSMEUT00000015125	ANKRD49		120.049	92.2764	129.268	121.602	115.799		83.2528	89.3596	104.439	113.347	97.5996
ENSMEUT00000008475	ANKRD50		0.395267	0.721157	6.56596	8.04663	3.93225		0.696829	0.602758	11.7809	13.066	6.53662
ENSMEUT00000004541	ANKRD52		2.2305	4.66863	13.6353	16.4374	9.24296		4.53028	4.86637	12.3957	20.4803	10.5682
ENSMEUT00000001648	ANKRD55		0	0	0	0	0		0.0426746	0.0130526	0.0524384	0	0.0270414
ENSMEUT00000014743	ANKRD6		16.6017	36.7275	82.6169	131.934	66.97		13.9546	25.0038	60.9923	116.629	54.1449
ENSMEUT00000007098	ANKRD61		0.663461	0.410175	19.8885	17.8489	9.70276		0.531522	0.374054	23.5162	17.8128	10.5586
ENSMEUT00000010462	ANKRD7		0.318466	0.357958	1.6395	0.229834	0.636439		0.252856	0.0587092	1.90459	0.242971	0.614782
ENSMEUT00000005296	ANKRD9		2.00126	2.58557	1.80363	1.44122	1.95792		2.82889	3.03229	2.56698	2.14895	2.64428
ENSMEUT00000006954	ANKS1A		6.53713	11.3202	48.0831	49.8659	28.9516		10.0503	9.30157	43.3742	56.1641	29.7225
ENSMEUT00000004529	ANKS1B		0	0	0.0260852	0.0259288	0.0130035		0	0.0197948	0.078861	0.0537306	0.0380966
ENSMEUT00000011198	ANKS3		19.661	26.1945	28.0764	39.5294	28.3653		19.6666	27.0276	30.9102	42.8654	30.1174
ENSMEUT00000016339	ANKS4B		0	0.0213387	0	0.242621	0.0659899		0.0224895	0	0.0833987	0	0.0264721
ENSMEUT00000014190	ANKS6		1.64237	1.41357	5.59393	4.29753	3.23685		2.8216	1.87597	8.9518	6.38213	5.00788
ENSMEUT00000006397	ANKZF1		44.8889	35.594	45.8389	37.8204	41.0356		40.2415	37.5169	40.3349	46.5914	41.1712
ENSMEUT00000008049	ANLN		0.177138	0.771346	0.379336	1.42528	0.688275		0.526192	1.13957	0.711572	1.92191	1.07481
ENSMEUT00000009485	ANO1		49.5602	19.8671	187.397	38.5289	73.8383		79.783	21.4334	185.597	52.179	84.7481
ENSMEUT00000001018	ANO10		5.02158	8.27155	12.3086	18.7097	11.0779		7.73374	10.0698	15.671	21.5025	13.7443
ENSMEUT00000003153	ANO2		0.0394478	0.046228	0.460566	0.523937	0.267545		0.117015	0.1617	0.356806	0.36462	0.250035
ENSMEUT00000010868	ANO3		0.0189047	0	0.0347025	0.0345024	0.0220274		0.00936504	0.00862925	0	0.178679	0.0491683
ENSMEUT00000012353	ANO4		31.8868	15.8339	132.829	68.4482	62.2495		29.583	12.9118	121.83	66.6609	57.7464
ENSMEUT00000006693	ANO5		3.93127	5.55073	67.8692	75.4692	38.2051		6.05049	3.11243	65.8103	76.7247	37.9245
ENSMEUT00000004170	ANO7		0.0501707	0.0825939	0.22663	0.361005	0.1801		0.0745194	0.0228906	0.228157	0.466238	0.197951
ENSMEUT00000010592	ANO8		5.13803	17.0067	5.74948	13.9046	10.4497		7.1813	14.3639	5.58686	13.2055	10.0844
ENSMEUT00000003851	ANO9		33.8055	15.0489	26.5112	10.9466	21.5781		33.1463	14.3148	21.0153	12.6326	20.2772
ENSMEUT00000005284	ANOS1		0	0.0794552	0.880375	2.49902	0.864713		0.05573	0.0385955	1.93234	3.52316	1.38746
ENSMEUT00000005385	ANP32B		104.443	118.11	133.627	169.157	131.334		117.403	124.399	150.954	156.399	137.289
ENSMEUT00000011144	ANP32E		18.1369	28.742	52.4195	62.0289	40.3318		31.1421	33.1989	63.5833	72.7711	50.1739
ENSMEUT00000013396	ANPEP		41.9689	54.1238	39.3961	53.0301	47.1297		39.1466	43.7358	38.9498	41.725	40.8893
ENSMEUT00000005942	ANTXR1		3.74124	6.55486	21.2021	22.7679	13.5665		9.52745	7.31251	41.3593	35.404	23.4008
ENSMEUT00000002493	ANTXR2		15.6892	12.4055	50.9422	30.4368	27.3684		29.1079	15.0098	79.3993	46.2376	42.4386
ENSMEUT00000005081	ANXA10		0	0	0	0	0		0	0	0	0	0
ENSMEUT00000008462	ANXA11		142.59	229.23	256.087	327.22	238.782		172.53	237.139	213.87	312.103	233.911
ENSMEUT00000012944	ANXA13		0.0318737	0.149082	0.111879	0	0.0732087		0.0945405	0.814929	0.562952	0.343595	0.454004
ENSMEUT00000009012	ANXA2		238.213	397.175	335.464	581.091	387.986		275.347	399.32	332.627	473.335	370.157
ENSMEUT00000005516	ANXA3		45.5333	56.5859	56.9029	56.3598	53.8455		67.4836	68.9247	84.1739	74.6314	73.8034
ENSMEUT00000000962	ANXA4		40.5731	54.4476	148.184	153.434	99.1597		58.3451	56.6105	138.937	138.199	98.0229
ENSMEUT00000010063	ANXA6		33.4106	42.6307	60.4944	70.6335	51.7923		55.4245	60.8506	77.5031	79.2985	68.2692
ENSMEUT00000006458	ANXA7		68.8269	55.4491	84.105	61.7215	67.5256		73.7739	67.3265	84.3195	74.9752	75.0988
ENSMEUT00000006615	ANXA9		22.1946	21.1258	31.5295	24.4344	24.8211		20.6384	23.4793	27.3852	25.1708	24.1684
ENSMEUT00000004379	AOAH		0.226965	0.195394	0.800234	0.397307	0.404975		1.03026	0.155002	1.00777	0.068777	0.565452
ENSMEUT00000006484	AOC1		0.116652	0.0109242	0.243823	0.0805946	0.112998		7.96663	0.0951574	0.163653	0.166864	2.09808
ENSMEUT00000011768	AOC2		0.987833	1.36608	3.78351	4.26942	2.60171		1.36909	1.09502	4.50694	6.11566	3.27168
ENSMEUT00000011782	AOC3		5.28133	8.4884	6.5429	7.43731	6.93748		9.56581	11.6778	10.518	12.0603	10.9555
ENSMEUT00000005558	AOX1		8.98743	15.5308	78.2143	103.255	51.4969		18.5105	16.6764	117.224	124.698	69.2772
ENSMEUT00000006353	AP1AR		10.6056	20.3789	56.4392	65.2221	38.1615		17.4438	19.7567	50.973	70.5387	39.678
ENSMEUT00000008467	AP1B1		17.4393	21.8941	45.6692	39.7799	31.1956		25.0702	25.5896	35.5466	41.0317	31.8095
ENSMEUT00000002522	AP1G1		12.4054	17.5407	81.3172	83.8707	48.7835		17.2753	15.5871	77.4648	80.2203	47.6369
ENSMEUT00000005348	AP1G2		91.34	87.1695	81.6616	71.9383	83.0274		82.9443	82.9998	65.8533	79.2101	77.7519
ENSMEUT00000000655	AP1M1		11.9356	16.0767	26.7806	31.4971	21.5725		15.4651	18.2371	26.8313	30.5095	22.7608
ENSMEUT00000003654	AP1M2		80.9209	111.664	135.953	194.465	130.751		91.5748	110.263	120.569	158.355	120.19
ENSMEUT00000016283	AP1S1		71.8573	87.0296	99.128	92.5288	87.6359		107.169	84.8094	108.156	90.6339	97.6921
ENSMEUT00000010542	AP1S2		15.9061	16.1117	44.1057	34.7079	27.7079		19.8505	19.4609	53.521	41.048	33.4701
ENSMEUT00000016620	AP1S3		33.446	71.3044	146.715	260.917	128.096		33.5724	53.3468	124.952	179.019	97.7225
ENSMEUT00000013613	AP2A1		93.8906	76.7044	58.4557	42.1005	67.7878		94.8988	83.8603	51.2363	52.5126	70.627
ENSMEUT00000015660	AP2A2		17.9826	22.1085	43.8946	39.2276	30.8033		27.9461	28.0297	47.2256	48.8882	38.0224
ENSMEUT00000015865	AP2B1		24.888	59.42	100.252	167.946	88.1265		38.9777	51.6085	85.0108	138.296	78.4732
ENSMEUT00000002567	AP2M1		205.2	242.038	260.345	216.447	231.008		257.3	256.84	240.64	230.62	246.35
ENSMEUT00000004230	AP3B1		17.5091	19.6703	79.6053	78.2927	48.7694		26.364	21.4581	90.5646	81.1173	54.876
ENSMEUT00000006399	AP3B2		0.0736596	0.145546	0.056966	0.170316	0.111622		0.16209	0.148391	0.0573141	0.234075	0.150468
ENSMEUT00000001930	AP3D1		13.3393	19.7091	76.1322	93.555	50.6839		17.465	15.8816	65.115	78.0129	44.1186
ENSMEUT00000013539	AP3M2		2.3588	1.87137	9.66002	9.80589	5.92402		2.29992	2.05629	10.3291	9.84986	6.13379
ENSMEUT00000010649	AP3S1		56.0292	57.9751	69.1974	74.1516	64.3383		60.7705	57.3836	81.2741	64.7129	66.0353
ENSMEUT00000003429	AP3S2		53.5894	69.3778	122.55	121.699	91.8041		71.902	67.764	134.531	107.116	95.3282
ENSMEUT00000001404	AP4E1		4.0709	4.62876	28.949	25.7804	15.8573		4.04187	3.80141	29.2131	27.7819	16.2096
ENSMEUT00000011053	AP4M1		40.0275	37.0008	30.6577	28.2394	33.9813		36.0524	36.1302	28.7976	30.6195	32.8999
ENSMEUT00000009276	AP5M1		6.63847	7.94301	22.1359	24.7239	15.3603		6.88675	6.88724	22.1061	23.835	14.9288
ENSMEUT00000001022	AP5S1		12.6262	13.1797	21.6467	13.4042	15.2142		21.8265	12.7211	18.4919	22.9583	18.9995
ENSMEUT00000002732	AP5Z1		13.4228	12.2252	30.2227	25.7952	20.4165		16.6384	14.0046	31.8819	29.5529	23.0194
ENSMEUT00000005416	APAF1		2.02802	2.38871	22.2176	17.177	10.9528		2.74342	1.19326	23.2418	20.9024	12.0202
ENSMEUT00000012068	APBA1		0.435334	0.626217	2.72741	2.3563	1.53632		0.802341	0.367074	4.64414	4.56595	2.59488
ENSMEUT00000016286	APBA2		0.694172	0.540248	2.74812	2.04782	1.50759		1.21084	0.697191	4.27016	3.57547	2.43842
ENSMEUT00000013058	APBA3		20.2496	26.8632	31.1373	28.4202	26.6676		24.0597	28.5425	27.6304	34.5098	28.6856
ENSMEUT00000012950	APBB1		15.8156	15.4247	12.1427	11.1048	13.6219		22.7122	24.5601	17.9966	19.4894	21.1896
ENSMEUT00000011878	APBB1IP		0.291852	0.216238	1.17695	0.882063	0.641776		0.471924	0.280468	2.487	1.20735	1.11169
ENSMEUT00000004779	APBB2		3.40466	4.54402	31.2465	20.312	14.8768		5.21493	2.74846	34.7989	25.3144	17.0192
ENSMEUT00000013691	APBB3		19.3848	24.3098	20.2063	18.8731	20.6935		24.2605	28.3024	19.591	24.7246	24.2196
ENSMEUT00000010892	APC		3.96672	4.28387	43.1378	46.4702	24.4646		3.86252	3.49154	43.7183	44.0558	23.782
ENSMEUT00000008157	APC2		0.103298	0.233586	0.209786	0.288878	0.208887		0.23045	0.240148	0.266131	0.43126	0.291997
ENSMEUT00000006881	APCDD1		5.88167	6.35828	112.3	105.469	57.5022		16.0642	7.69097	258.128	137.968	104.963
ENSMEUT00000006912	APCDD1L		0.0450358	0.0422431	0.301947	0.303287	0.173128		0.13403	0.162523	0.988014	0.387655	0.418056
ENSMEUT00000005268	APEH		68.5095	93.5476	74.7849	114.167	87.7523		51.7648	85.7634	57.2283	109.78	76.1341
ENSMEUT00000014563	APEX1		70.7702	98.9016	61.5009	73.365	76.1344		80.3248	108.253	65.981	84.7319	84.8227
ENSMEUT00000006837	APH1A		86.6682	96.2984	86.1639	66.2779	83.8521		118.355	97.9863	83.2326	77.1844	94.1896
ENSMEUT00000006666	APIP		45.67	39.3411	44.8029	48.5793	44.5983		48.3394	43.9629	54.9459	43.8279	47.769
ENSMEUT00000004972	APITD1-CORT		58.484	63.9802	42.1866	40.0861	51.1842		59.9348	59.196	35.9159	37.9055	48.2381
ENSMEUT00000001524	APLP1		23.999	27.2767	15.5521	11.7622	19.6475		22.0034	24.0372	11.1819	14.8031	18.0064
ENSMEUT00000005936	APLP2		196.609	191.193	438.124	333.613	289.885		308.922	213.417	468.353	348.785	334.869
ENSMEUT00000012081	APMAP		9.42695	10.8472	55.224	52.9251	32.1058		14.4986	10.2605	60.4172	44.4371	32.4034
ENSMEUT00000010046	APOA1		1.41549	1.00126	0.464601	0.46031	0.835415		5.01397	1.3677	0.625966	0.639649	1.91182
ENSMEUT00000011308	APOA2		1.02914	0.960896	0.864465	0	0.713625		93.5718	1.8726	0	0.895174	24.0849
ENSMEUT00000007066	APOA4		0.749431	2.41731	0.96918	1.92975	1.51642		0.968519	1.88817	0.801123	1.72562	1.34586
ENSMEUT00000007052	APOA5		0	0.045309	0.0804912	0	0.0314501		1.89006	0.0440062	0.162365	0.165596	0.565507
ENSMEUT00000004198	APOB		0.0359564	0.0675058	0.102346	0.171787	0.0943988		1.70023	0.0620158	0.173775	0.348877	0.571224
ENSMEUT00000013446	APOBEC1		0	0	0.171215	0	0.0428038		0	0	0	0	0
ENSMEUT00000011647	APOBEC2		0.187607	0.26329	0.161698	0.322372	0.233742		0.139261	0.722296	0.490432	0.332119	0.421027
ENSMEUT00000007072	APOC3		3.86134	3.7794	1.12471	1.67563	2.61027		268.901	2.71995	0.622543	1.89195	68.5339
ENSMEUT00000011853	APOD		28.1213	37.845	16.0974	23.5	26.3909		33.6942	46.0193	21.181	26.9055	31.95
ENSMEUT00000015668	APOH		0.32078	0.121291	0.123159	0.362168	0.231849		17.0144	0.0885778	0	0.628959	4.43298
ENSMEUT00000015391	APOM		40.133	36.3685	26.5927	30.0794	33.2934		47.4795	33.9308	27.7878	27.7451	34.2358
ENSMEUT00000014260	APOO		55.3556	64.5774	62.7113	96.4708	69.7788		50.4819	64.1793	64.5254	78.3261	64.3782
ENSMEUT00000001283	APOPT1		47.5788	48.4939	176.423	175.668	112.041		47.2438	50.2654	195.057	167.085	114.913
ENSMEUT00000004191	APP		71.0252	95.2566	170.921	148.1	121.326		137.354	126.387	239.115	202.074	176.233
ENSMEUT00000012375	APPBP2		15.2739	14.6954	134.819	133.627	74.6038		14.4062	11.3089	135.561	128.519	72.4488
ENSMEUT00000002609	APPL1		5.48532	9.20692	52.1486	64.7143	32.8888		6.79479	6.58382	53.583	71.9765	34.7345
ENSMEUT00000012519	APPL2		27.645	27.4139	100.386	76.1046	57.8874		35.3253	30.1728	78.0245	78.0107	55.3833
ENSMEUT00000010399	APRT		96.5064	150.165	64.1617	94.0582	101.223		108.009	185.049	65.2464	89.3615	111.916
ENSMEUT00000004163	APTX		18.2284	18.4087	50.0839	56.9621	35.9208		20.2363	19.3018	54.0933	56.1181	37.4374
ENSMEUT00000001153	AQP10		0.0328779	0.0613874	1.92975	0.968711	0.748182		0.0324957	0.119063	2.36504	1.43108	0.98692
ENSMEUT00000004856	AQP11		3.39256	4.43422	3.47422	3.06658	3.59189		3.15703	4.68168	2.69571	3.59314	3.53189
ENSMEUT00000004701	AQP2		0.487109	0.162901	0.478609	0.362978	0.372899		0.276019	0.0632994	0	0.248688	0.147002
ENSMEUT00000014595	AQP3		0.204719	0.793581	0.34736	0	0.336415		0.37164	0.12368	0.348317	0.118474	0.240528
ENSMEUT00000013907	AQP4		0.162026	0.0916186	2.1288	1.65232	1.00869		0.516652	0	4.63688	1.58283	1.68409
ENSMEUT00000004712	AQP5		58.6101	24.7936	70.8157	22.2146	44.1085		33.4855	15.2443	31.5672	12.35	23.1617
ENSMEUT00000010858	AQP6		0.423178	0.724151	0.58736	1.3075	0.760547		0.104983	0.414793	0.118831	0.853956	0.373141
ENSMEUT00000009436	AQP8		0.0443073	0.041491	0	0	0.0214496		0	0	0.155375	0.159656	0.0787578
ENSMEUT00000013707	AQP9		0.0696964	0.0328205	0	0.126144	0.0571652		0.694153	0.0637997	0.124764	0.132139	0.253714
ENSMEUT00000011776	AQR		14.176	12.8964	45.6452	43.5267	29.0611		14.5395	13.1685	45.1918	43.5598	29.1149
ENSMEUT00000016176	AR		0.881367	1.61189	18.4309	9.78577	7.67748		2.84876	1.34318	15.7674	18.0849	9.51106
ENSMEUT00000007043	ARAF		69.0856	76.3522	53.8799	54.1904	63.377		64.44	77.4176	48.0336	64.8339	63.6813
ENSMEUT00000005807	ARAP1		39.0181	28.8171	51.0658	32.7991	37.925		43.1378	30.1639	44.2673	41.8538	39.8557
ENSMEUT00000003224	ARAP2		1.89953	0.979607	63.9182	43.3301	27.5319		1.43979	0.680065	63.6372	36.236	25.4983
ENSMEUT00000008455	ARAP3		12.9125	15.8707	11.0918	11.1424	12.7544		13.8798	17.706	8.82057	13.7877	13.5485
ENSMEUT00000001683	ARCN1		40.5086	58.6421	225.462	234.541	139.788		58.3999	58.0035	210.644	212.345	134.848
ENSMEUT00000003890	AREG		0.0468005	0.087227	0	0	0.0335069		0	0	0	0	0
ENSMEUT00000002614	AREL1		8.66605	10.3554	36.1538	35.1257	22.5752		9.38717	6.69585	35.9824	38.972	22.7594
ENSMEUT00000004281	ARF3		2.06785	3.4475	8.14448	5.43512	4.77374		3.12076	3.24887	4.86207	6.50215	4.43346
ENSMEUT00000001013	ARF4		136.307	202.81	197.692	242.612	194.855		183.879	219.718	176.762	212.672	198.258
ENSMEUT00000011474	ARF6		77.1107	101.681	124.148	112.195	103.784		104.811	101.549	112.679	133.26	113.075
ENSMEUT00000004998	ARFGAP2		68.2692	77.8997	69.4532	64.0402	69.9156		83.2149	78.9454	66.7785	78.0479	76.7467
ENSMEUT00000006920	ARFGAP3		71.8439	73.126	153.455	129.353	106.944		80.4156	69.244	121.145	116.496	96.8251
ENSMEUT00000016600	ARFGEF1		1.6528	1.34643	72.9278	67.0951	35.7555		1.28104	0.752261	68.2922	63.7095	33.5088
ENSMEUT00000008299	ARFGEF3		2.38877	0.945934	159.648	80.6604	60.9108		1.83694	0.617829	131.34	79.243	53.2594
ENSMEUT00000000053	ARFIP1		7.90661	16.6893	63.4012	94.9539	45.7378		11.1081	15.582	67.3108	90.1543	46.0388
ENSMEUT00000007890	ARFIP2		63.7002	83.9332	108.234	104.519	90.0966		71.9549	73.3874	98.0864	114.469	89.4744
ENSMEUT00000011959	ARFRP1		13.6623	19.5501	83.9441	71.8092	47.2414		18.9503	18.27	75.4597	75.2941	46.9935
ENSMEUT00000010016	ARG1		0.129811	0.548569	2.32618	1.71371	1.17957		5.47375	0.0591604	3.39787	2.50896	2.85994
ENSMEUT00000004903	ARG2		29.0296	22.5955	73.282	63.5339	47.1103		26.1029	22.7468	62.9081	67.3513	44.7773
ENSMEUT00000007804	ARGLU1		84.1475	83.5961	257.346	198.455	155.886		113.118	82.2371	246.79	236.736	169.72
ENSMEUT00000012331	ARHGAP1		39.808	74.4203	57.7653	54.7624	56.689		64.2822	90.8554	46.7758	70.5683	68.1204
ENSMEUT00000001133	ARHGAP10		3.3547	6.13729	16.027	18.171	10.9225		7.95898	10.1737	27.5977	29.3426	18.7682
ENSMEUT00000005415	ARHGAP12		5.20755	5.663	52.4806	44.83	27.0453		7.27515	5.0995	53.2913	45.9213	27.8968
ENSMEUT00000006548	ARHGAP15		0.0730079	0.092151	1.04183	0.828419	0.508852		0.144948	0.0672639	1.82933	1.07761	0.779788
ENSMEUT00000003501	ARHGAP17		11.0249	12.2516	25.6065	20.3652	17.312		11.4161	10.224	20.9635	22.3713	16.2437
ENSMEUT00000009978	ARHGAP18		35.3013	39.0985	232.865	209.755	129.255		41.2586	37.4688	210.767	183.948	118.361
ENSMEUT00000006542	ARHGAP20		0.455633	0.988799	4.95825	8.51416	3.72921		0.884745	0.845219	5.2568	10.1674	4.28854
ENSMEUT00000002900	ARHGAP22		0.495938	0.767468	1.29508	1.58159	1.03502		1.20287	0.528992	2.08325	1.19852	1.25341
ENSMEUT00000010388	ARHGAP24		0	0.0263837	0.0507431	0.0497414	0.031717		0.111249	0.0384556	0.102226	0.156936	0.102217
ENSMEUT00000012055	ARHGAP25		1.09564	0.449008	1.00593	0.299625	0.712551		1.10271	0.66386	1.62158	0.827557	1.05393
ENSMEUT00000014920	ARHGAP26		4.07448	2.36966	140.38	64.0038	52.707		2.83735	0.771847	114.028	62.7448	45.0955
ENSMEUT00000005135	ARHGAP29		4.92558	4.04918	20.1614	16.0563	11.2981		5.27239	4.20684	23.0998	17.7694	12.5871
ENSMEUT00000009756	ARHGAP30		2.31398	3.33373	2.39523	3.63094	2.91847		3.79914	4.81785	4.03156	4.54047	4.29725
ENSMEUT00000013389	ARHGAP32		3.22328	3.59917	30.2601	46.1251	20.8019		1.74981	1.16064	22.2041	42.4968	16.9028
ENSMEUT00000000982	ARHGAP33		5.93261	7.47589	2.17655	1.40233	4.24685		8.08353	7.7932	2.02512	2.95908	5.21523
ENSMEUT00000013663	ARHGAP35		4.77381	7.34253	87.8237	67.304	41.811		8.35602	4.79923	76.8047	75.4327	41.3482
ENSMEUT00000012884	ARHGAP39		1.25907	2.53013	10.1762	10.3715	6.08422		2.31304	2.7496	11.3501	13.8865	7.57481
ENSMEUT00000008876	ARHGAP4		6.96909	8.12253	7.39819	10.3642	8.2135		2.62863	8.70006	2.85641	9.64288	5.957
ENSMEUT00000011310	ARHGAP42		2.00794	3.19665	19.6945	17.8804	10.6949		2.44404	3.0824	28.3758	22.7488	14.1628
ENSMEUT00000000010	ARHGAP44		0.241199	0.175167	1.29362	0.892668	0.650664		0.368873	0.329748	2.84223	1.89714	1.3595
ENSMEUT00000014029	ARHGAP45		1.08713	1.08431	3.85261	1.9871	2.00279		2.44567	1.29014	5.59764	3.73912	3.26814
ENSMEUT00000001089	ARHGAP6		1.72256	3.32252	7.81037	11.0349	5.97259		3.28943	3.66665	11.8708	13.1061	7.98325
ENSMEUT00000006531	ARHGAP9		0.148993	0.0535416	0.348874	0.0778847	0.157323		0.328373	0.310969	0.507026	0.119653	0.316505
ENSMEUT00000008609	ARHGDIA		156.172	230.489	151.231	165.917	175.952		233.21	245.48	148.666	159.961	196.829
ENSMEUT00000007343	ARHGDIB		4.87143	1.97889	4.9072	3.56665	3.83104		9.59729	3.8442	10.1282	2.06521	6.40872
ENSMEUT00000008777	ARHGDIG		37.6354	38.2894	30.3312	27.02	33.319		54.7833	46.1914	31.3336	28.5521	40.2151
ENSMEUT00000012717	ARHGEF1		55.0512	48.5655	31.4214	23.9795	39.7544		53.7195	50.5586	25.7894	29.8756	39.9858
ENSMEUT00000015839	ARHGEF10		4.74641	5.49409	20.1049	27.5495	14.4737		6.55868	4.87834	27.7289	28.0518	16.8044
ENSMEUT00000003117	ARHGEF10L		14.3228	18.532	28.4093	25.0599	21.581		15.2437	18.842	22.6705	30.8967	21.9132
ENSMEUT00000015130	ARHGEF11		27.0185	23.0112	42.3849	29.8917	30.5766		30.1073	21.6793	41.9592	37.2659	32.7529
ENSMEUT00000016476	ARHGEF12		5.95091	5.69067	79.6889	80.7866	43.0293		4.2237	3.50959	79.8706	87.3896	43.7484
ENSMEUT00000005545	ARHGEF15		0.987608	1.71219	1.08932	0.847109	1.15906		1.49381	1.70835	1.26583	1.25749	1.43137
ENSMEUT00000005122	ARHGEF16		37.9188	37.2927	72.3231	56.7821	51.0792		40.0049	32.2996	58.0246	61.3067	47.9089
ENSMEUT00000008376	ARHGEF17		1.25885	2.9691	3.29386	2.28378	2.4514		3.95926	4.38546	5.37335	5.47429	4.79809
ENSMEUT00000006283	ARHGEF19		68.4163	45.6974	68.3903	42.3772	56.2203		53.131	43.3021	50.0339	44.3876	47.7136
ENSMEUT00000005145	ARHGEF2		11.1707	22.9701	28.5977	49.6659	28.1011		13.4495	24.0454	23.1193	46.7213	26.8339
ENSMEUT00000009892	ARHGEF25		14.5083	13.3673	11.631	12.661	13.0419		18.9259	26.1974	16.4785	24.0208	21.4057
ENSMEUT00000016360	ARHGEF26		2.35057	5.13244	5.29988	7.79718	5.14502		2.34021	4.32206	4.31232	6.70762	4.42055
ENSMEUT00000015822	ARHGEF3		14.4248	26.72	41.7322	58.7204	35.3993		17.494	23.449	36.19	57.481	33.6535
ENSMEUT00000013546	ARHGEF37		2.05882	2.36299	16.4136	12.3589	8.29858		1.95964	1.13276	11.9238	9.87077	6.22174
ENSMEUT00000009308	ARHGEF39		2.8821	2.37719	8.35032	12.3996	6.5023		4.71472	2.55061	7.94101	11.6884	6.72368
ENSMEUT00000007392	ARHGEF4		1.23209	1.71096	3.02473	3.79247	2.44006		2.06576	2.02807	3.28586	5.16099	3.13517
ENSMEUT00000006980	ARHGEF40		1.96131	2.74019	2.46236	2.54681	2.42767		5.06172	4.41123	5.02285	4.8339	4.83243
ENSMEUT00000003766	ARHGEF5		17.2828	15.5413	33.7746	21.8378	22.1091		20.2067	15.778	27.496	25.5718	22.2631
ENSMEUT00000015682	ARHGEF6		1.4757	1.83679	2.96355	2.70926	2.24633		2.53786	1.91453	4.59518	4.17301	3.30514
ENSMEUT00000006983	ARHGEF7		3.71786	4.4159	69.3855	60.5342	34.5134		5.83755	2.70638	80.5267	62.4426	37.8783
ENSMEUT00000006478	ARHGEF9		0.691647	1.5224	1.22317	3.76686	1.80102		1.04325	1.71394	1.85064	2.70582	1.82841
ENSMEUT00000000665	ARID1B		3.81262	7.64513	34.653	39.7955	21.4766		5.35233	5.98015	31.9163	44.2506	21.8748
ENSMEUT00000013610	ARID2		5.2773	4.03095	42.5502	34.738	21.6491		5.47381	2.69674	41.7875	36.6	21.6395
ENSMEUT00000015808	ARID3A		0.885959	1.7044	7.68113	6.42902	4.17513		1.78508	1.71683	6.11867	7.76265	4.34581
ENSMEUT00000002631	ARID3B		11.0945	14.0122	16.5029	15.6321	14.3104		14.2194	11.6686	14.5993	17.9736	14.6152
ENSMEUT00000002431	ARID3C		1.41554	0.949624	0.742111	0.299351	0.851657		1.42478	0.729568	0.372642	0.456981	0.745993
ENSMEUT00000003689	ARID4A		7.00745	7.19944	39.1795	39.3324	23.1797		7.37374	6.11907	39.9448	38.7349	23.0431
ENSMEUT00000011344	ARID4B		3.24891	3.02584	32.5252	30.5874	17.3468		3.65105	2.52118	34.7474	32.2323	18.288
ENSMEUT00000005368	ARID5B		5.82407	5.01227	78.8391	66.7485	39.106		6.05091	2.64636	71.6467	63.471	35.9537
ENSMEUT00000007440	ARIH1		19.0158	25.3315	65.9845	61.7695	43.0253		24.3531	23.204	57.2833	66.985	42.9564
ENSMEUT00000000389	ARIH2		38.2416	44.9748	72.8845	67.5985	55.9248		37.8406	40.7876	63.0225	77.6338	54.8211
ENSMEUT00000015570	ARL1		218.821	281.585	286.565	324.262	277.808		252.208	254.184	290.624	305.643	275.665
ENSMEUT00000008061	ARL13B		6.62613	8.09214	30.8665	36.0368	20.4054		8.31772	8.87238	37.8564	36.0963	22.7857
ENSMEUT00000001330	ARL14		0	0	0	0	0		0	0	0	0	0
ENSMEUT00000001875	ARL14EP		48.9603	71.9575	167.563	203.425	122.976		71.5464	74.8245	172.215	195.696	128.57
ENSMEUT00000016130	ARL15		29.1315	46.3331	244.394	271.739	147.899		37.4748	43.0427	198.946	227.129	126.648
ENSMEUT00000011107	ARL16		15.4835	18.9974	20.0482	17.9575	18.1216		17.4341	17.1716	19.1948	19.9968	18.4493
ENSMEUT00000001563	ARL2BP		46.5534	62.6428	121.686	200.25	107.783		55.4848	60.7744	140.963	160.441	104.416
ENSMEUT00000006558	ARL4C		9.9968	11.3575	12.4758	5.54626	9.84409		20.5468	14.6571	12.7452	9.41538	14.3411
ENSMEUT00000013667	ARL5A		19.3514	26.7376	119.809	144.381	77.5697		26.0919	28.3548	139.693	137.72	82.9649
ENSMEUT00000007948	ARL5B		0.656797	1.09229	27.5301	43.2305	18.1274		0.649122	0.734073	24.4981	44.6817	17.6407
ENSMEUT00000014959	ARL8B		43.227	59	171.067	142.932	104.056		67.1431	62.4736	150.717	147.321	106.914
ENSMEUT00000011798	ARMC1		11.5951	13.0264	58.2173	56.3355	34.7936		14.1692	14.4399	65.3622	58.8878	38.2148
ENSMEUT00000016578	ARMC12		3.80192	5.39869	7.18514	5.48291	5.46717		2.89133	5.03529	4.53725	6.64239	4.77656
ENSMEUT00000004987	ARMC2		1.95962	1.89485	8.92187	11.5311	6.07686		1.82221	1.56261	9.96906	12.2758	6.40742
ENSMEUT00000002713	ARMC3		5.35554	7.91137	14.6372	21.1365	12.2602		7.08446	9.51281	16.8715	23.5968	14.2664
ENSMEUT00000008949	ARMC5		0.975973	1.56756	2.19571	1.0486	1.44696		1.64856	1.41316	1.34426	3.12235	1.88208
ENSMEUT00000008961	ARMC5		6.81457	7.58472	4.20269	3.48358	5.52139		8.93426	8.34881	3.97714	3.94505	6.30132
ENSMEUT00000009419	ARMC6		5.09609	8.77048	10.5866	14.0447	9.62447		7.44004	8.48793	9.37411	16.722	10.506
ENSMEUT00000014964	ARMC8		4.90717	5.15029	35.7913	32.8669	19.6789		5.71781	4.24743	34.9553	31.1141	19.0087
ENSMEUT00000005778	ARMC9		2.77556	5.66818	6.68551	13.021	7.03756		3.33336	6.6509	7.15696	15.7428	8.221
ENSMEUT00000003066	ARNT		14.3167	20.023	44.9027	41.9573	30.2999		24.8008	21.9741	48.2141	51.6018	36.6477
ENSMEUT00000008380	ARNT2		0.905758	2.05152	7.47023	9.90183	5.08233		1.15696	1.10008	10.7372	18.5618	7.88901
ENSMEUT00000014970	ARNTL		7.17697	10.5695	17.229	22.2423	14.3044		8.70779	10.3684	15.4138	23.0034	14.3733
ENSMEUT00000007064	ARNTL2		0	0.0829641	0.0656314	0.257639	0.101559		0.0174484	0.0645359	0.19882	0.135308	0.104028
ENSMEUT00000007897	ARPC1B		13.3511	15.5366	12.3315	10.66	12.9698		25.8694	28.7298	19.0736	17.0505	22.6808
ENSMEUT00000011273	ARPC2		88.8002	165.297	121.853	170.604	136.639		114.92	166.224	111.352	169.121	140.404
ENSMEUT00000004021	ARPC3		380.184	397.067	285.076	354.948	354.319		394.717	415.166	324.502	286.807	355.298
ENSMEUT00000000476	ARPP19		68.9909	93.1212	189.764	237.873	147.437		82.1757	97.9047	222.252	275.862	169.549
ENSMEUT00000003296	ARPP21		7.51405	19.9883	23.8894	48.6388	25.0076		7.95942	17.3008	16.3171	50.0494	22.9067
ENSMEUT00000005275	ARR3		0	0.0249406	0.271541	0.363276	0.164939		0.0263671	0	0	0.0931685	0.0298839
ENSMEUT00000008624	ARRB1		4.77334	9.02858	28.4179	31.5674	18.4468		6.4056	5.59965	31.0599	34.8541	19.4798
ENSMEUT00000001982	ARRB2		21.4674	13.552	22.3231	13.2945	17.6593		28.1893	17.1423	23.854	18.1548	21.8351
ENSMEUT00000007109	ARRDC1		129.645	175.345	131.664	113.556	137.553		137.856	151.131	85.7446	116.01	122.685
ENSMEUT00000007111	ARRDC2		2.88485	4.34864	2.34345	3.06566	3.16065		4.31951	4.7909	3.57987	4.58511	4.31885
ENSMEUT00000014569	ARRDC3		7.37429	9.54994	62.0069	62.9459	35.4693		11.3421	9.31442	80.7319	59.6673	40.2639
ENSMEUT00000010752	ARRDC4		1.29563	5.22993	3.85226	30.7376	10.2789		1.40247	3.94867	9.20994	20.6557	8.80419
ENSMEUT00000012180	ARSA		28.3761	22.6204	26.5053	17.5281	23.7575		29.7145	26.08	26.0607	20.9431	25.6996
ENSMEUT00000010987	ARSB		1.0134	1.72105	4.54388	4.86794	3.03657		1.85747	1.85291	6.1455	6.95704	4.20323
ENSMEUT00000000430	ARSE		3.29397	2.27714	9.99082	5.43329	5.2488		6.59072	2.45632	17.7292	5.67467	8.11273
ENSMEUT00000001678	ARSG		12.5194	6.24437	19.8251	9.43534	12.0061		12.5105	7.21699	19.6738	11.8359	12.8093
ENSMEUT00000004359	ARSH		0	0	0.0632781	0	0.0158195		0	0	0	0	0
ENSMEUT00000000331	ARSI		0.300176	1.55227	0.698126	1.11348	0.916013		1.51569	2.60717	1.49952	2.30197	1.98109
ENSMEUT00000001882	ARSJ		0.0887898	0.180212	0.943893	1.05295	0.566461		0.482386	0.403353	2.75155	1.67815	1.32886
ENSMEUT00000014159	ARSK		5.06702	7.22529	19.9507	23.7145	13.9894		6.73633	7.54107	22.5885	24.8527	15.4296
ENSMEUT00000011552	ART1		0	0.0286255	0.100615	0.201104	0.0825861		0.0300778	0.0550477	0.403924	0.309662	0.199678
ENSMEUT00000010282	ART3		12.1694	19.5349	17.4278	24.575	18.4268		9.19984	13.6564	12.38	15.9022	12.7846
ENSMEUT00000013514	ART5		0.261527	0	0.221766	0	0.120823		0.291823	0.118243	0.44491	0	0.213744
ENSMEUT00000012810	ARV1		12.2958	14.1087	28.922	23.4589	19.6963		13.7203	14.1235	24.1363	23.1154	18.7739
ENSMEUT00000007822	ARVCF		10.8137	12.5563	28.4746	20.7003	18.1362		14.3467	13.4795	25.7519	28.8757	20.6135
ENSMEUT00000004744	ARX		0.0281988	0.0262902	0	0	0.0136222		0.0279877	0.0127478	0.0486835	0	0.0223547
ENSMEUT00000013171	AS3MT		0	0	0	0	0		0	0	0.156283	0.318073	0.118589
ENSMEUT00000016054	ASAH1		63.4314	61.5954	65.3298	53.5486	60.9763		83.5559	70.2074	69.9097	59.247	70.73
ENSMEUT00000009514	ASAP1		1.8675	1.74981	16.9754	9.86715	7.61496		2.87427	1.52251	18.6113	14.6505	9.41465
ENSMEUT00000013875	ASAP2		3.55565	2.68474	21.8444	14.4616	10.6366		4.25051	2.32295	24.9813	19.7208	12.8189
ENSMEUT00000005191	ASAP3		6.02207	5.56436	7.86766	5.2952	6.18732		11.3856	8.02813	12.7567	11.6775	10.962
ENSMEUT00000008110	ASB1		1.70096	2.45363	6.91593	6.39578	4.36658		3.08631	2.78363	6.0942	7.90726	4.96785
ENSMEUT00000004143	ASB11		0.0632366	0.148176	0.113488	0.22229	0.136798		0.0625083	0.028695	0.342996	0.349259	0.195865
ENSMEUT00000004211	ASB12		0.0780344	0.182105	0.129692	0	0.0974579		0.308184	0.212476	0	0	0.130165
ENSMEUT00000002616	ASB14		0.124198	0.40881	0.167526	0.496452	0.299246		0.215062	0.241091	0.448885	0.747111	0.413037
ENSMEUT00000009844	ASB15		0.0524769	0.115418	0.529488	0.129831	0.206803		0.190996	0.080015	0.534064	0.40834	0.303354
ENSMEUT00000006539	ASB16		0.963813	0.830977	2.15673	1.6286	1.39503		0.786938	0.887999	2.35769	1.64826	1.42022
ENSMEUT00000011114	ASB17		0.337597	0.239215	4.01704	4.39109	2.24624		0.251375	0.154255	3.59482	3.3669	1.84184
ENSMEUT00000005964	ASB2		0.136525	0.455552	0.897532	1.74282	0.808107		0.360821	1.28095	3.02724	4.51151	2.29513
ENSMEUT00000000196	ASB4		0.22065	0.124121	0	0.223645	0.142104		0.152769	0.119835	0.225514	0	0.124529
ENSMEUT00000002811	ASB5		3.43655	1.49336	3.19334	1.70214	2.45635		3.87993	1.71966	3.65044	2.19324	2.86082
ENSMEUT00000007773	ASB6		6.1209	9.59251	11.1704	13.1252	10.0023		7.90549	8.11407	12.2895	17.3646	11.4184
ENSMEUT00000008722	ASB8		13.1004	15.5617	27.4981	35.3085	22.8672		15.3514	16.1978	41.3271	39.4977	28.0935
ENSMEUT00000002954	ASB9		0.346422	0.097481	0.245862	0.121062	0.202707		0.547907	0.409129	0.740509	0.75759	0.613784
ENSMEUT00000014892	ASCC2		12.303	16.0597	16.0436	17.7601	15.5416		12.0409	16.4272	13.1402	21.4475	15.764
ENSMEUT00000003084	ASCC3		1.30917	1.69745	28.5314	30.6636	15.5504		1.89938	1.21516	32.267	29.8761	16.3144
ENSMEUT00000010409	ASCL2		0.300856	0.561011	0	0.170391	0.258065		0.550544	0.319626	0.164437	0	0.258652
ENSMEUT00000016336	ASCL3		0.333954	0.188907	0.709596	0.465036	0.424373		0.132868	0.123406	0.481328	0.48921	0.306703
ENSMEUT00000013442	ASF1A		48.2999	45.1303	78.8275	85.9712	64.5572		48.1197	41.6293	87.6227	76.1291	63.3752
ENSMEUT00000004318	ASF1B		2.14768	2.27487	3.34008	1.66881	2.35786		2.8433	2.26513	2.77244	3.26989	2.78769
ENSMEUT00000008439	ASH1L		3.67842	4.95025	31.207	27.7727	16.9021		5.10758	3.60406	29.6155	33.3005	17.9069
ENSMEUT00000002579	ASH2L		14.276	14.9686	20.3285	21.3473	17.7301		18.9604	16.6487	25.0203	22.3191	20.7371
ENSMEUT00000002030	ASIC1		2.80595	2.23785	4.40299	3.29105	3.18446		5.43685	2.87936	5.80824	4.35553	4.61999
ENSMEUT00000010008	ASIC2		1.00718	0.360801	1.2641	0.424713	0.764199		1.13114	0.417455	1.43404	0.270632	0.813317
ENSMEUT00000002047	ASIC3		1.04611	2.42069	0.408851	1.99403	1.46742		0.637265	2.00847	0.23475	1.86485	1.18633
ENSMEUT00000004103	ASIC4		3.43083	1.01056	1.07101	0.705402	1.55445		4.38335	0.873977	1.65064	0.507509	1.85387
ENSMEUT00000014751	ASIP		0	0	0	0	0		0.198456	0	0	0	0.049614
ENSMEUT00000007712	ASMT		0.14298	0	0.208451	0.104248	0.11392		0.0564982	0	0	0.107483	0.0409953
ENSMEUT00000013642	ASMTL		6.89048	6.91021	32.8506	29.7036	19.0887		9.72798	7.82775	30.1407	30.0944	19.4477
ENSMEUT00000014065	ASNA1		60.8195	71.1428	57.375	54.2614	60.8997		65.4163	72.6168	54.6424	62.8713	63.8867
ENSMEUT00000015630	ASNS		3.02275	17.3562	2.02537	13.8479	9.06305		3.08438	10.0972	1.5479	5.39973	5.0323
ENSMEUT00000006720	ASNSD1		25.5537	27.8106	38.0904	49.9571	35.3529		24.2871	26.1864	42.6695	48.217	35.34
ENSMEUT00000011529	ASPA		0.273696	0.486007	0	0.415498	0.2938		0.602576	1.02291	0.417736	0.64238	0.671401
ENSMEUT00000000335	ASPDH		0.034094	0.0318724	0.1078	0	0.0434416		2.16261	0.0612989	0	0.220996	0.611226
ENSMEUT00000009740	ASPH		4.26481	6.55878	26.3664	30.5273	16.9293		5.53134	5.69149	32.9826	33.7501	19.4889
ENSMEUT00000012959	ASPHD2		0.422362	0.615606	2.21131	2.49334	1.43565		0.759798	0.454414	1.48406	1.89595	1.14856
ENSMEUT00000010286	ASPN		2.13715	2.47091	4.3244	3.8833	3.20394		4.65797	3.84866	10.1605	8.4154	6.77063
ENSMEUT00000005568	ASPSCR1		46.8011	47.9112	56.1018	60.0551	52.7173		42.447	47.1557	49.8171	55.0232	48.6108
ENSMEUT00000008259	ASRGL1		5.97441	8.95847	6.89018	9.33578	7.78971		10.6328	13.978	11.1491	15.7678	12.8819
ENSMEUT00000016122	ASS1		0.691728	0.695444	3.06171	2.85629	1.82629		20.9701	0.79131	2.90919	3.14192	6.95313
ENSMEUT00000011605	ASTE1		11.6699	11.6269	22.7685	26.427	18.1231		13.5834	11.4141	27.6669	25.8735	19.6345
ENSMEUT00000015007	ASTN1		0.214967	0.465148	0.903012	0.723124	0.576563		0.623242	0.416807	1.73997	1.00855	0.947142
ENSMEUT00000005417	ASTN2		1.18017	0.321686	2.72857	0.728957	1.23985		2.13259	0.558942	2.98957	0.85107	1.63304
ENSMEUT00000012003	ASZ1		0	0	0	0.116383	0.0290958		0	0.0575418	0.119515	0.244047	0.105276
ENSMEUT00000010709	ATAD2		1.10526	1.21472	11.8563	15.0787	7.31374		1.29196	1.3083	10.7458	13.9018	6.81196
ENSMEUT00000001928	ATAD2B		5.75233	7.0158	24.5796	21.2868	14.6586		8.20221	6.46768	20.8904	26.929	15.6223
ENSMEUT00000003604	ATAD5		0.381077	0.18882	2.0363	1.0062	0.903099		0.557501	0.33201	2.29643	1.46667	1.16315
ENSMEUT00000012521	ATAT1		45.9503	47.2283	35.8753	33.7209	40.6937		46.0653	50.7011	33.3214	38.3658	42.1134
ENSMEUT00000003351	ATCAY		0	0	0	0.0909206	0.0227302		0	0	0	0	0
ENSMEUT00000009259	ATE1		5.54315	8.97062	97.4153	100.144	53.0183		8.77497	8.08188	100.413	110.094	56.841
ENSMEUT00000016630	ATF2		8.85367	10.4538	70.8231	64.6199	38.6876		12.3465	9.78661	68.7486	67.0022	39.471
ENSMEUT00000007732	ATF3		1.68842	5.68597	5.08177	8.38162	5.20945		2.88419	5.25311	5.41078	7.77824	5.33158
ENSMEUT00000011238	ATF4		637.3	832.673	260.671	342.149	518.198		522.164	802.677	224.415	362.445	477.925
ENSMEUT00000012719	ATF5		392.17	333.205	86.6697	60.6901	218.184		305.348	303.824	60.618	77.4923	186.821
ENSMEUT00000008145	ATF6		12.1155	19.3074	98.8842	102.616	58.2308		15.9483	15.4203	89.7551	96.8439	54.4919
ENSMEUT00000014217	ATF6B		49.3621	55.8023	39.9389	31.7194	44.2057		66.75	65.5381	33.9279	39.3957	51.4029
ENSMEUT00000005199	ATF7IP2		57.6406	32.9508	273.838	163.454	131.971		47.6799	25.4833	226.759	128.708	107.158
ENSMEUT00000003425	ATG10		11.8535	12.3194	23.471	24.4058	18.0124		13.6144	11.5876	25.6775	22.6397	18.3798
ENSMEUT00000003601	ATG101		0	0	0	0	0		0.0522923	0	0	0	0.0130731
ENSMEUT00000001460	ATG12		18.362	28.0667	19.2595	32.4727	24.5402		26.8144	28.6477	30.0793	28.8423	28.5959
ENSMEUT00000012314	ATG13		64.4069	65.9082	178.633	116.839	106.447		81.6238	60.4472	138.507	122.957	100.884
ENSMEUT00000004888	ATG14		4.83671	3.06329	21.487	15.8819	11.3172		5.19782	2.40715	21.2928	16.2405	11.2846
ENSMEUT00000008023	ATG16L1		11.9615	19.5951	32.4087	35.8936	24.9647		16.3227	18.9309	33.4188	42.4912	27.7909
ENSMEUT00000002987	ATG16L2		15.8344	11.8076	12.5817	9.12049	12.336		13.731	12.6263	11.6635	10.5138	12.1336
ENSMEUT00000010877	ATG2A		14.3043	13.6761	11.1633	8.22547	11.8423		14.9076	14.6413	10.1813	11.1504	12.7201
ENSMEUT00000013812	ATG2B		0.749572	0.672828	22.5338	25.5598	12.379		0.55622	0.443756	23.5964	26.4621	12.7646
ENSMEUT00000002304	ATG3		90.0719	89.4741	114.541	136.573	107.665		89.8072	94.0551	126.192	131.437	110.373
ENSMEUT00000005667	ATG4A		31.3788	50.5381	85.3874	94.6872	65.4979		40.425	48.6165	93.9865	94.8082	69.4591
ENSMEUT00000003753	ATG4B		3.86624	4.94009	26.4369	19.4393	13.6706		4.88917	5.35139	18.907	28.3162	14.3659
ENSMEUT00000003165	ATG4C		8.11187	8.09315	22.1367	21.135	14.8692		10.5582	8.47866	23.3414	19.6943	15.5181
ENSMEUT00000003621	ATG4D		18.5169	23.1343	15.6996	18.066	18.8542		18.6643	22.4039	12.6684	19.7107	18.3618
ENSMEUT00000004806	ATG7		6.17006	9.25923	31.1277	36.2933	20.7126		8.63064	9.41387	32.692	36.3909	21.7819
ENSMEUT00000006364	ATG9A		22.9094	26.2524	25.2161	20.7707	23.7872		26.5109	26.1712	20.0145	27.0016	24.9245
ENSMEUT00000008320	ATG9B		1.07968	1.4562	0.685602	0.719842	0.985331		1.20097	1.73841	0.286947	0.94073	1.04176
ENSMEUT00000000854	ATIC		9.76542	18.3322	32.5068	48.4558	27.2651		12.5066	19.91	30.8901	44.1846	26.8728
ENSMEUT00000006391	ATL1		0.785713	1.33962	4.39546	6.02784	3.13716		1.69917	1.9395	7.45691	6.95195	4.51188
ENSMEUT00000012970	ATL2		30.3372	28.3666	80.7794	74.674	53.5393		33.0637	26.2387	78.4944	63.2721	50.2672
ENSMEUT00000016085	ATL3		16.5083	25.2206	63.2344	68.1911	43.2886		21.299	22.7557	52.6439	67.4335	41.033
ENSMEUT00000002012	ATM		2.0145	1.40758	45.8882	39.2474	22.1394		2.05527	1.07003	48.7687	38.8496	22.6859
ENSMEUT00000014166	ATMIN		11.2805	10.4413	43.8369	46.8626	28.1053		10.2886	9.09295	38.9064	43.0579	25.3365
ENSMEUT00000015368	ATN1		43.1845	62.6913	12.5926	11.0055	32.3685		48.0361	68.0898	9.99093	19.1612	36.3195
ENSMEUT00000009686	ATOH1		0	0	0	0	0		0	0	0	0	0
ENSMEUT00000015087	ATOX1		2103.7	2967.01	820.428	1219.54	1777.67		1316.83	2761.2	562.868	1107.24	1437.03
ENSMEUT00000013369	ATP10A		2.80914	2.34208	8.82921	6.22032	5.05019		4.03662	2.65367	13.0508	9.82524	7.39158
ENSMEUT00000008637	ATP10B		4.38666	18.3877	25.4064	66.2306	28.6028		6.0374	10.2142	26.3024	65.9239	27.1195
ENSMEUT00000001630	ATP10D		1.50821	1.37584	4.67664	5.24452	3.2013		2.6537	1.81156	10.763	6.89645	5.53118
ENSMEUT00000004816	ATP11A		4.45654	7.48338	75.8961	138.406	56.5605		3.56382	5.45445	70.0054	127.111	51.5337
ENSMEUT00000009210	ATP11B		3.49627	3.54771	60.8253	55.8941	30.9408		3.92062	2.65491	58.8313	51.8941	29.3252
ENSMEUT00000000465	ATP11C		1.25951	6.51319	24.9208	84.5165	29.3025		1.13958	2.69831	12.8353	48.2315	16.2262
ENSMEUT00000016136	ATP13A1		62.8659	67.0633	61.3045	67.7539	64.7469		57.251	63.1769	54.2712	74.1406	62.2099
ENSMEUT00000001513	ATP13A2		4.26466	7.06884	9.10516	9.34384	7.44562		5.28302	5.70436	6.74921	11.3272	7.26595
ENSMEUT00000007518	ATP13A3		7.55988	14.7673	65.4127	69.4118	39.2879		10.6036	9.90947	56.6316	75.0691	38.0534
ENSMEUT00000006061	ATP13A4		42.2473	58.2445	59.5919	97.5966	64.4201		32.1412	50.9003	40.7543	87.9113	52.9268
ENSMEUT00000009263	ATP13A5		0.0424982	0.0265307	0.0506558	0.0503837	0.0425171		0.0420939	0.0193373	0	0.182345	0.060944
ENSMEUT00000011773	ATP1A2		3.99565	6.11825	6.56479	8.34254	6.25531		8.00123	11.1902	11.7539	15.8937	11.7098
ENSMEUT00000016692	ATP1A3		0.0245594	0.0383747	0.0278948	0.139016	0.0574612		0.113508	0.0593552	0.0838511	0.0859925	0.0856767
ENSMEUT00000006251	ATP1B1		60.1358	85.9255	61.2959	101.599	77.2391		74.5916	89.8792	71.9718	82.7661	79.8022
ENSMEUT00000007361	ATP1B2		1.05721	4.97563	1.43927	2.04112	2.37831		5.17763	8.74321	2.78153	2.83928	4.88541
ENSMEUT00000008262	ATP1B3		88.3833	225.682	77.1912	198.589	147.461		72.3953	218.405	52.5388	176.9	130.06
ENSMEUT00000005075	ATP1B4		1.22843	1.99362	0.901246	0.790441	1.22843		2.63527	4.21947	1.92452	2.37073	2.7875
ENSMEUT00000003312	ATP23		21.5548	19.2226	16.8042	19.2635	19.2113		22.8338	21.7583	22.3648	20.3024	21.8148
ENSMEUT00000008141	ATP2A1		2.32956	3.36219	3.00186	3.29289	2.99662		2.77841	4.10112	2.56286	4.29081	3.4333
ENSMEUT00000016622	ATP2A2		17.8642	34.2344	77.1226	92.6435	55.4662		33.5015	37.0942	77.3431	115.629	65.892
ENSMEUT00000013123	ATP2A3		0.155081	0.38406	0.425506	0.696699	0.415336		0.268246	0.658954	1.0151	1.20243	0.786183
ENSMEUT00000014346	ATP2B1		7.92908	9.51216	39.8938	40.6409	24.494		13.2919	13.575	62.7589	65.7816	38.8518
ENSMEUT00000009687	ATP2B2		4.86687	9.31476	16.1498	21.4573	12.9472		4.99323	7.51851	13.213	20.3707	11.5239
ENSMEUT00000004285	ATP2B3		0.0758393	0.142539	0	0.266751	0.121282		0.102468	0.156774	0.0489572	0.175346	0.120886
ENSMEUT00000013761	ATP2B4		1.43485	2.22642	8.50495	6.13102	4.57431		2.82941	1.8927	15.1697	14.8928	8.69615
ENSMEUT00000002786	ATP2C1		40.3257	44.676	121.24	93.0533	74.8237		56.592	38.3887	121.289	95.3978	77.9169
ENSMEUT00000010551	ATP2C2		7.00998	16.2384	29.2141	61.8401	28.5756		5.3467	12.7911	18.0139	45.5886	20.4351
ENSMEUT00000008615	ATP4A		0	0	0	0.0275552	0.0068888		0.0158424	0	0	0.0282194	0.0110154
ENSMEUT00000009800	ATP5A1		254.406	271.741	331.379	386.983	311.127		300.951	287.795	343.344	346.301	319.598
ENSMEUT00000002886	ATP5B		577.314	630.795	602.959	641.494	613.14		629.767	638.764	598.073	611.627	619.558
ENSMEUT00000014772	ATP5C1		216.079	205.588	181.576	213.697	204.235		208.514	213.544	191.635	202.316	204.002
ENSMEUT00000008143	ATP5D		231.127	208.642	69.116	51.4095	140.074		196.814	212.915	51.5205	60.407	130.414
ENSMEUT00000011297	ATP5F1		399.296	363.509	318.559	383.163	366.132		382.292	397.456	341.895	347.324	367.242
ENSMEUT00000005755	ATP5G1		357.268	549.076	179.982	298.752	346.269		339.404	519.353	193.727	267.56	330.011
ENSMEUT00000004671	ATP5G2		959.769	947.213	429.02	388.684	681.172		936.262	913.206	370.225	391.878	652.893
ENSMEUT00000011953	ATP5G3		574.769	739.57	277.668	374.129	491.534		673.884	727.202	278.972	334.556	503.654
ENSMEUT00000009369	ATP5H		363.723	339.972	258.476	311.354	318.381		336.178	367.983	290.092	256.749	312.75
ENSMEUT00000008459	ATP5S		15.1352	11.7725	26.1495	21.506	18.6408		14.9911	12.7103	23.8895	17.7487	17.3349
ENSMEUT00000010937	ATP6AP1		50.2096	69.053	69.399	68.9739	64.4089		71.0692	77.812	65.6291	73.4801	71.9976
ENSMEUT00000011346	ATP6AP1L		0.531649	0.373445	0.949323	0.70372	0.639534		0.590076	0.362934	1.42937	0.73559	0.779492
ENSMEUT00000003542	ATP6AP2		35.9292	51.8473	48.0369	66.5162	50.5824		48.9625	66.9583	62.6128	68.2795	61.7033
ENSMEUT00000016736	ATP6V0A1		17.3256	22.4618	61.203	65.0116	41.5005		20.5352	22.149	54.1672	60.231	39.2706
ENSMEUT00000003983	ATP6V0A2		12.4712	15.353	66.9648	74.3445	42.2834		13.0119	12.7847	61.3642	71.2891	39.6125
ENSMEUT00000012228	ATP6V0A4		14.9466	11.9494	31.9223	28.7504	21.8922		11.7171	9.5086	20.4559	16.754	14.6089
ENSMEUT00000004606	ATP6V0C		378.354	470.75	75.527	56.4095	245.26		438.991	476.882	51.4833	68.1569	258.878
ENSMEUT00000014391	ATP6V0D1		51.8766	57.2733	72.9817	57.3232	59.8637		72.2153	78.1205	70.6238	80.4953	75.3637
ENSMEUT00000008053	ATP6V0D2		69.9774	0.165092	132.84	49.1006	63.0208		59.4554	0.161582	115.289	36.2337	52.7849
ENSMEUT00000008599	ATP6V0E1		182.037	267.989	201.722	247.399	224.787		221.867	261.189	216.695	230.386	232.534
ENSMEUT00000002426	ATP6V1A		14.9576	20.6495	75.8186	94.6097	51.5089		19.7964	19.3668	66.0946	70.2649	43.8807
ENSMEUT00000002625	ATP6V1B1		0.103275	0.0967068	0.352922	0.295349	0.212063		0.170458	0.218479	0.236224	0.120889	0.186512
ENSMEUT00000008371	ATP6V1C1		2.54767	2.36887	4.37171	3.92404	3.30307		2.72086	2.85648	4.43951	4.2934	3.57756
ENSMEUT00000008245	ATP6V1E2		78.2466	97.7118	194.539	205.112	143.902		100.228	95.1532	200.75	205.835	150.492
ENSMEUT00000015009	ATP6V1F		254.31	339.43	224.645	259.947	269.583		278.35	307.897	225.824	248.976	265.262
ENSMEUT00000000116	ATP6V1H		23.2582	20.6506	48.6019	40.7251	33.3089		28.8148	23.3118	46.8012	38.4141	34.3355
ENSMEUT00000012306	ATP7B		0.365811	0.687325	1.368	1.77484	1.04899		0.76064	0.519181	2.32262	2.49184	1.52357
ENSMEUT00000003198	ATP8A1		16.9482	4.94471	613.542	250.671	221.526		20.5292	3.94041	747.51	253.802	256.445
ENSMEUT00000011496	ATP8A2		1.12305	1.48563	22.1527	14.0968	9.71454		1.4409	1.37765	25.1215	16.6151	11.1388
ENSMEUT00000001430	ATP8B1		3.31339	3.90949	28.2828	25.9983	15.376		4.23654	2.65655	27.2033	23.4273	14.3809
ENSMEUT00000008582	ATP8B2		7.08298	9.46619	28.1451	19.5652	16.0649		12.2502	11.1248	29.0652	27.2737	19.9285
ENSMEUT00000016341	ATP8B3		0.0157218	0.022076	0.0272971	0	0.0162737		0.0389072	0.0499333	0.0273904	0.112108	0.0570847
ENSMEUT00000000543	ATP8B4		0.280683	0.178395	5.0716	5.2523	2.69574		0.458092	0.402411	10.8624	12.578	6.07523
ENSMEUT00000009526	ATP9A		13.5989	18.445	189.863	230.576	113.121		9.19104	12.4784	157.959	196.185	93.9534
ENSMEUT00000011835	ATP9B		4.97894	5.35341	43.3842	33.9477	21.9161		5.72781	4.77752	40.4203	35.6982	21.656
ENSMEUT00000004458	ATPAF1		22.2559	22.7275	18.4865	15.7531	19.8057		23.0447	21.0988	17.0665	23.2354	21.1114
ENSMEUT00000003342	ATPAF2		59.4247	82.2023	53.4341	83.4058	69.6167		46.3939	86.0021	45.4877	81.811	64.9237
ENSMEUT00000010449	ATR		10.7757	8.79421	38.1545	40.2524	24.4942		8.95403	8.46547	41.6381	42.2818	25.3348
ENSMEUT00000006880	ATRN		1.96773	2.0802	36.4445	35.2955	18.947		2.13636	1.3922	48.1525	44.1162	23.9493
ENSMEUT00000012940	ATRNL1		0.241604	0.409999	14.1845	17.8345	8.16765		0.491499	0.447237	28.4527	32.2009	15.3981
ENSMEUT00000000226	ATRX		1.55101	1.49426	52.6452	54.6857	27.594		1.71825	1.08783	60.5231	57.1615	30.1227
ENSMEUT00000014724	ATXN1		1.29063	2.69592	14.3385	17.4155	8.93514		1.74189	2.10321	16.862	21.9026	10.6524
ENSMEUT00000010139	ATXN10		19.9264	19.5864	27.1636	27.3058	23.4956		22.7152	21.329	25.7529	27.054	24.2128
ENSMEUT00000012300	ATXN2		13.3884	17.351	37.4557	33.7193	25.4786		16.3323	16.7755	30.828	40.659	26.1487
ENSMEUT00000011151	ATXN2L		20.0124	27.5907	24.1162	25.9115	24.4077		24.1141	29.8079	19.0902	29.2474	25.5649
ENSMEUT00000011747	ATXN7		2.07549	2.98608	15.9671	13.4106	8.60982		2.20948	2.09803	12.5886	15.2635	8.0399
ENSMEUT00000004129	ATXN7L1		1.42719	1.90788	12.6593	12.3708	7.09129		1.93495	1.05557	11.5014	12.2473	6.6848
ENSMEUT00000002299	ATXN7L2		4.77233	5.38671	4.25142	4.71761	4.78202		6.59178	7.16218	4.87537	5.79764	6.10674
ENSMEUT00000006569	ATXN7L3		42.745	54.0599	107.843	106.094	77.6855		53.2353	51.7816	102.528	117.965	81.3775
ENSMEUT00000004597	AUH		14.681	12.56	29.2603	25.0741	20.3939		16.1756	13.7295	33.9222	30.4079	23.5588
ENSMEUT00000016230	AUNIP		0.974463	0.82715	1.02264	2.01246	1.20918		1.36002	1.51634	2.65126	2.59068	2.02958
ENSMEUT00000014021	AUP1		143.286	158.138	72.1619	61.7168	108.826		142.423	156.909	63.6796	78.1578	110.292
ENSMEUT00000001517	AURKAIP1		190.157	191.49	101.073	122.025	151.186		167.391	188.621	106.485	116.766	144.816
ENSMEUT00000016021	AUTS2		3.31874	7.00958	10.0848	15.9228	9.08398		3.44294	6.09019	8.27554	16.2577	8.51659
ENSMEUT00000005392	AVEN		16.0047	11.8686	15.7337	12.9725	14.1449		16.5632	14.0641	17.0927	15.8054	15.8813
ENSMEUT00000004080	AVIL		7.20528	6.68101	12.2796	12.5297	9.6739		6.82885	7.48398	11.5325	14.0164	9.96543
ENSMEUT00000000355	AVL9		9.82451	13.1293	34.1612	35.0483	23.0408		12.1994	12.2756	30.4044	36.13	22.7523
ENSMEUT00000004756	AVPR1A		0.0419355	0.726786	0.969751	3.48611	1.30615		0.124118	0.935006	0.752098	4.20249	1.50343
ENSMEUT00000009237	AVPR1B		0	0	0	0	0		0	0	0	0	0
ENSMEUT00000008838	AVPR2		0.51638	0.119691	0	0.0878823	0.180988		1.37626	0.53654	0.527381	0.45111	0.722823
ENSMEUT00000006102	AWAT1		0	0.0291883	0	0	0.00729708		0	0	0	0	0
ENSMEUT00000015156	AWAT2		0.0386096	0.0360897	0.127542	0.127657	0.0824746		0	0	0.127868	0.262229	0.0975243
ENSMEUT00000008824	AXIN1		8.42569	9.63661	29.412	25.0741	18.1371		11.9046	10.158	31.1122	29.6683	20.7108
ENSMEUT00000011651	AXIN2		7.42035	8.22256	39.287	27.4128	20.5857		14.5647	8.27125	55.6285	33.1913	27.9139
ENSMEUT00000015098	AXL		11.2766	19.3775	17.4875	13.6996	15.4603		29.5075	33.4216	21.4029	23.9379	27.0675
ENSMEUT00000003817	AZI2		42.2491	48.9838	154.92	135.824	95.4942		45.6064	40.7212	144.193	143.119	93.4099
ENSMEUT00000014873	AZIN2		0.115649	0.198883	2.57711	1.46104	1.08817		0.247806	0.192041	2.53541	1.90897	1.22106
ENSMEUT00000001345	B3GALNT1		22.2015	14.4795	50.0605	32.6121	29.8384		19.0742	13.3575	45.1237	31.538	27.2733
ENSMEUT00000016823	B3GALT4		0.608406	0.43248	0.976732	1.14497	0.790647		1.30271	0.791674	0.735739	2.00194	1.20802
ENSMEUT00000006498	B3GAT1		0.213944	0.249518	1.5965	1.80662	0.966646		0.344233	0.724951	2.23001	3.00465	1.57596
ENSMEUT00000010130	B3GAT2		0.81981	1.78514	0.892575	2.11298	1.40263		1.15281	2.13961	0.64834	2.77583	1.67915
ENSMEUT00000008820	B3GAT3		29.9474	24.3641	12.3097	8.27755	18.7247		29.3882	26.3	11.6326	10.3738	19.4237
ENSMEUT00000014417	B3GLCT		4.58418	5.33139	17.6833	15.7319	10.8327		7.38261	5.90924	23.4613	18.3176	13.7677
ENSMEUT00000005060	B3GNT2		2.57556	5.63604	11.076	15.6759	8.74088		5.52981	7.95901	19.5221	24.1679	14.2947
ENSMEUT00000009683	B3GNT3		0.0299095	0.0560776	0	0.19439	0.0700943		0.0296249	0.108459	0.0979344	0.300392	0.134103
ENSMEUT00000000735	B3GNT5		1.8256	1.26504	6.78542	8.607	4.62076		2.53778	1.4227	14.8474	10.6949	7.3757
ENSMEUT00000009907	B4GALNT1		4.04228	2.28861	5.56128	2.31091	3.55077		5.99926	2.99767	4.0348	2.37056	3.85057
ENSMEUT00000012462	B4GALNT2		1.6579	0.768285	2.31603	0.861077	1.40082		0.930811	0.29122	1.4525	0.296271	0.7427
ENSMEUT00000010774	B4GALNT3		31.626	36.1622	106.492	69.1594	60.8599		21.7003	26.898	40.7197	64.3611	38.4198
ENSMEUT00000013312	B4GALNT4		4.80916	4.93761	2.93674	2.98709	3.91765		5.67724	6.41104	3.3858	4.94768	5.10544
ENSMEUT00000014264	B4GALT2		89.8058	102.305	66.4947	53.4224	78.007		102.305	99.1567	56.7608	63.6307	80.4633
ENSMEUT00000004474	B4GALT3		30.5571	51.3633	38.2417	41.3487	40.3777		35.0329	48.7601	27.4519	52.2781	40.8807
ENSMEUT00000005984	B4GALT4		11.5185	20.1683	39.9267	66.9836	34.6493		14.0406	17.2653	39.0245	60.6525	32.7457
ENSMEUT00000015095	B4GALT5		6.30749	10.932	23.2969	32.806	18.3356		7.11422	9.37626	25.157	31.6784	18.3315
ENSMEUT00000002659	B4GALT6		0	0.0754345	0	0	0.0188586		0.053146	0.0244762	0.501523	0.102541	0.170422
ENSMEUT00000004482	B4GALT7		11.6058	11.8135	14.2344	12.2912	12.4862		13.8897	10.6307	16.9879	9.57062	12.7697
ENSMEUT00000000638	B9D1		111.242	119.671	185.648	188.68	151.31		138.987	119.996	200.286	163.376	155.661
ENSMEUT00000001204	B9D2		59.3808	72.5964	23.1402	18.79	43.4768		64.3661	75.4891	22.7137	28.9085	47.8693
ENSMEUT00000005367	BAAT		1.20391	1.35189	2.94182	3.46336	2.24024		1.44503	0.885335	1.81406	2.1128	1.56431
ENSMEUT00000010468	BABAM2		14.7992	15.5464	37.3466	41.4291	27.2803		20.8842	19.6957	42.4426	44.4528	31.8688
ENSMEUT00000005375	BACE1		13.4086	16.4095	30.1146	26.138	21.5177		17.7276	13.9052	26.9692	32.5672	22.7923
ENSMEUT00000003746	BACE2		1.55829	1.80326	10.8635	9.6388	5.96596		2.217	1.79089	14.1972	10.9731	7.29455
ENSMEUT00000000130	BACH1		0.959078	1.17358	23.4613	17.0656	10.6649		1.18081	0.736375	32.7191	19.6058	13.5605
ENSMEUT00000016367	BACH2		6.57641	11.1438	11.3078	8.90783	9.48396		8.60861	8.64265	8.71607	10.846	9.20333
ENSMEUT00000005046	BAD		134.306	135.17	70.9268	59.8168	100.055		142.838	143.856	81.0128	74.6152	110.58
ENSMEUT00000010095	BAG2		12.3093	16.677	31.2337	43.4356	25.9139		13.1581	17.7519	31.5943	34.3344	24.2097
ENSMEUT00000008729	BAG3		25.6213	24.4375	41.2776	31.9459	30.8206		27.7514	25.7825	34.0074	31.4989	29.76
ENSMEUT00000015387	BAG6		35.4577	34.5814	47.0401	37.6028	38.6705		43.9144	42.3432	38.3439	44.033	42.1586
ENSMEUT00000001474	BAHD1		2.69119	3.97278	5.40751	5.50069	4.39304		4.13227	4.44876	4.80862	7.08469	5.11858
ENSMEUT00000005804	BAIAP2		27.0625	29.0514	114.039	85.247	63.85		40.3866	30.9877	107.866	98.618	69.4646
ENSMEUT00000007819	BAIAP2L1		13.8219	18.1592	49.7377	48.5191	32.5595		13.8638	16.5117	29.9953	38.9583	24.8323
ENSMEUT00000011445	BAIAP2L2		0.136698	0.222732	0.056576	0.0573776	0.118346		0.134901	0.153817	0.11379	0.0581042	0.115153
ENSMEUT00000007504	BAIAP3		0.543691	0.701378	1.16145	0.910178	0.829174		0.935858	0.877054	1.31989	1.19459	1.08185
ENSMEUT00000004422	BAK1		9.88805	15.4301	17.2646	23.028	16.4027		15.8494	14.5775	14.7682	16.8228	15.5045
ENSMEUT00000012393	BAMBI		46.6173	21.4766	48.9564	20.5605	34.4027		52.5478	25.873	53.8438	27.3811	39.9114
ENSMEUT00000004964	BANF1		1008.21	1036.17	511.916	423.543	744.96		1115.14	1043.99	433.459	502.432	773.755
ENSMEUT00000001966	BANK1		0	0	0.137131	0.0447448	0.045469		0.0840529	0.011091	0.277052	0.0471295	0.104831
ENSMEUT00000006502	BANP		11.9248	4.95061	25.8771	13.0401	13.9482		13.5526	3.69249	24.4392	13.4488	13.7833
ENSMEUT00000001499	BAP1		13.0102	16.2385	22.9375	19.3023	17.8721		17.7016	17.6051	23.8503	25.5554	21.1781
ENSMEUT00000008764	BARHL1		0.222771	0.668154	0.154416	0	0.261335		0.221588	0.529226	0.157219	0.318831	0.306716
ENSMEUT00000008602	BARHL2		0.0217066	0	0	0	0.00542665		0	0	0	0	0
ENSMEUT00000011937	BARX1		0.0377536	0	0	0	0.0094384		0	0	0	0	0
ENSMEUT00000014918	BARX2		0.306623	0.891729	0.839096	0.827153	0.71615		0.57314	1.48386	0.362801	1.10869	0.882123
ENSMEUT00000002850	BATF		0.954452	0.893359	0	0.479964	0.581944		1.42201	0.724737	3.01755	1.03723	1.55038
ENSMEUT00000008019	BATF3		0	0.111398	1.32419	0.442045	0.469408		0.473876	0.330401	2.27566	0.452684	0.883155
ENSMEUT00000011187	BAZ1A		10.4716	9.7986	40.784	40.6243	25.4196		9.07306	7.76187	36.4004	36.5395	22.4437
ENSMEUT00000006284	BAZ1B		18.3245	24.4586	80.8702	80.622	51.0688		21.9678	23.203	74.0133	89.2711	52.1138
ENSMEUT00000002882	BAZ2A		10.7992	16.296	42.8016	34.1455	26.0106		17.3304	14.4145	32.9664	37.5953	25.5767
ENSMEUT00000011333	BAZ2B		4.9205	3.61405	69.7807	59.3887	34.426		4.75737	2.81661	70.9403	60.3498	34.716
ENSMEUT00000003553	BBOF1		7.54307	8.39379	55.0809	54.5115	31.3823		8.20167	8.84264	56.3663	52.9163	31.5817
ENSMEUT00000000351	BBOX1		24.2596	36.1309	65.0477	92.7346	54.5432		26.5702	30.1546	57.2936	68.5485	45.6417
ENSMEUT00000016619	BBS2		8.08573	10.735	22.5382	26.3389	16.9245		11.7199	12.9942	26.5553	26.9884	19.5645
ENSMEUT00000003588	BBS4		36.7155	32.4451	45.1089	50.715	41.2461		38.2702	35.6225	48.3697	47.3721	42.4086
ENSMEUT00000001496	BBS7		14.2985	8.15605	37.0649	19.5303	19.7624		16.465	9.99022	39.2106	24.3232	22.4973
ENSMEUT00000011815	BBS9		2.59316	4.46049	19.8119	17.8496	11.1788		4.54112	4.71856	20.4382	24.1973	13.4738
ENSMEUT00000010667	BBX		1.31237	0.993956	42.5454	32.4265	19.3196		1.15415	0.616855	44.2789	31.2633	19.3283
ENSMEUT00000008159	BCAM		147.912	136.964	148.985	91.3492	131.303		221.744	195.242	178.779	142.53	184.574
ENSMEUT00000009238	BCAN		0.275084	0.436745	0.57602	0.181671	0.36738		1.06928	0.635375	1.09363	0.496922	0.823802
ENSMEUT00000007360	BCAP31		210.868	222.848	227.815	220.666	220.549		252.519	231.725	236.385	218.975	234.901
ENSMEUT00000014041	BCAR1		15.8756	19.1761	10.3974	11.062	14.1278		16.5214	21.8085	9.44828	14.2725	15.5127
ENSMEUT00000004891	BCAR3		2.67754	3.35331	6.84452	6.12494	4.75008		3.00982	3.74597	7.23962	5.91164	4.97676
ENSMEUT00000012990	BCAS3		2.27344	2.0341	11.7482	6.77905	5.7087		3.53612	2.66948	11.2722	8.15999	6.40945
ENSMEUT00000012994	BCAS3		1.48154	1.4616	13.6577	8.51042	6.27782		2.0265	1.10015	13.5527	9.8195	6.62471
ENSMEUT00000011974	BCAT1		0	0	0.279532	0.275528	0.138765		0	0	0.564645	0.14356	0.177051
ENSMEUT00000002183	BCHE		0.115804	0.291769	0.514865	0.216658	0.284774		0.344378	0.319045	0.446806	0.607474	0.429426
ENSMEUT00000013184	BCKDHB		15.25	20.5105	32.4788	38.0595	26.5747		18.5215	24.273	28.9437	37.6662	27.3511
ENSMEUT00000014358	BCKDK		17.4714	27.7901	31.6094	33.6878	27.6397		23.9834	27.2373	28.4654	32.7181	28.1011
ENSMEUT00000001829	BCL11A		1.01291	1.79737	2.68321	4.45249	2.48649		0.786082	1.65616	0.954132	4.27577	1.91804
ENSMEUT00000008192	BCL2		2.37056	2.32408	12.9137	13.7047	7.82826		3.45822	2.76649	17.4081	22.5344	11.5418
ENSMEUT00000014219	BCL2L1		31.789	59.6867	76.8861	84.0838	63.1114		47.0235	57.4735	69.2927	96.3946	67.5461
ENSMEUT00000000959	BCL2L13		4.18301	6.12606	47.0546	47.843	26.3017		6.78133	5.76777	42.6902	42.845	24.5211
ENSMEUT00000005310	BCL2L15		1.28948	1.67633	1.30455	1.94657	1.55423		1.58257	1.90402	4.34786	3.39311	2.80689
ENSMEUT00000003056	BCL2L2		24.6105	31.6045	24.0064	20.2374	25.1147		31.0364	30.2308	24.9992	22.7233	27.2474
ENSMEUT00000004602	BCL3		22.9182	23.0778	5.92351	3.22697	13.7866		30.1852	27.8085	6.62298	6.95983	17.8941
ENSMEUT00000004424	BCL6		11.6542	17.7692	20.1315	24.6614	18.5541		15.1171	19.3522	20.4825	25.2379	20.0474
ENSMEUT00000000375	BCL6B		13.1982	32.472	13.6424	29.3287	22.1603		17.377	33.4384	13.8931	30.2016	23.7275
ENSMEUT00000013726	BCL7A		71.6877	74.5087	100.051	85.1065	82.8385		70.2932	70.8445	85.3988	104.49	82.7566
ENSMEUT00000005744	BCL7B		31.0146	75.7489	30.9399	75.9314	53.4087		35.7058	67.2511	28.7328	76.2863	51.994
ENSMEUT00000014481	BCL9		6.65841	7.74388	12.1046	9.08491	8.89795		8.83272	7.46904	9.91123	11.1121	9.33127
ENSMEUT00000000366	BCL9L		4.58489	10.1773	13.5465	10.8251	9.78345		8.83534	12.9079	11.3467	16.4026	12.3731
ENSMEUT00000013267	BCLAF1		19.2664	19.5008	143.962	136.898	79.9068		23.5468	17.8179	152.263	132.324	81.4879
ENSMEUT00000014381	BCO1		0.0854741	0.200743	0.857456	1.83467	0.744586		0.253584	0.214552	0.863647	0.882195	0.553495
ENSMEUT00000015181	BCO2		5.73917	4.5303	14.0165	9.22935	8.37883		7.76983	4.61852	18.3549	11.7387	10.6205
ENSMEUT00000002061	BCOR		7.98965	8.87757	32.2563	25.1178	18.5603		9.77352	6.77069	27.263	27.6174	17.8562
ENSMEUT00000007489	BCORL1		2.73056	5.01007	11.2231	10.69	7.41343		4.20575	4.78434	6.52459	15.6067	7.78035
ENSMEUT00000000285	BCR		14.5535	14.0858	19.8749	15.1289	15.9108		17.8638	13.7426	18.0721	18.2819	16.9901
ENSMEUT00000015734	BCS1L		24.466	23.1186	23.1998	24.4466	23.8078		24.8169	27.0485	22.7746	25.2143	24.9636
ENSMEUT00000005641	BDH1		0.0934254	0.26135	0	0	0.0886939		0.307603	0.196331	0.108452	0.885405	0.374448
ENSMEUT00000007144	BDH2		25.7493	40.9712	35.5502	54.1471	39.1044		37.4247	39.3777	42.3426	40.4784	39.9059
ENSMEUT00000013881	BDNF		0.155795	0.473655	0.915128	0.390322	0.483725		0.620454	0.496684	0.265049	0.67333	0.513879
ENSMEUT00000010427	BEGAIN		0.0605848	0.0424759	0.102315	0.103058	0.0771084		0.105043	0.0686247	0.0513725	0.052466	0.0693765
ENSMEUT00000013578	BEND3		0.798248	0.887758	6.23614	5.60338	3.38138		1.09284	0.824697	4.58715	6.44462	3.23733
ENSMEUT00000007702	BEND4		0	0	0.0857663	0	0.0214416		0	0	0	0	0
ENSMEUT00000008199	BEND5		43.7194	27.2727	35.013	22.2564	32.0654		37.1016	27.5106	28.4547	22.4274	28.8736
ENSMEUT00000014991	BEND7		2.84583	5.23908	17.2187	33.6521	14.7389		3.938	4.73005	13.3088	27.2992	12.319
ENSMEUT00000010200	BEST1		0	0	0.12738	0.635605	0.190746		0	0.0169319	0.63866	0.393145	0.262184
ENSMEUT00000014082	BEST2		0.0174701	0.0163725	0.0601816	0	0.0235061		0.0173068	0.0157748	0.0605516	0	0.0234083
ENSMEUT00000015114	BEST3		0.0394106	0.0123351	0.384447	0.287371	0.180891		0.0911805	0.0119931	0.4851	0.445635	0.258477
ENSMEUT00000001414	BEST4		0.0194761	0.0543657	0.0652255	0	0.0347668		0.0385676	0.0526886	0.131569	0.269005	0.122958
ENSMEUT00000003012	BFSP1		0	0.0133542	0.160508	0.0527299	0.056648		0.0140557	0.0130267	0.0539777	0.0550862	0.0340366
ENSMEUT00000009682	BFSP2		0	0	0	0	0		0.0211022	0	0	0	0.00527555
ENSMEUT00000013629	BGN		0.738801	1.33912	1.49995	2.2832	1.46527		1.57131	2.14792	2.47442	4.26354	2.6143
ENSMEUT00000010823	BHLHE40		7.61351	12.7939	11.1242	13.233	11.1912		9.22392	13.5695	8.63724	17.6524	12.2708
ENSMEUT00000013095	BHLHE41		23.9686	29.521	32.2644	26.6152	28.0923		28.3916	26.7189	20.1969	32.4881	26.9489
ENSMEUT00000015063	BHMT		0.331225	0.119246	0.182436	0	0.158227		2.87724	0.162581	0.184316	0.188036	0.853043
ENSMEUT00000015074	BHMT2		1.19484	0.288655	1.43652	0.438095	0.839528		1.36662	0.364673	1.56271	1.02902	1.08076
ENSMEUT00000005494	BICC1		0.648609	1.75077	4.9299	6.16534	3.37365		1.90213	2.02257	7.69848	10.0478	5.41775
ENSMEUT00000011386	BICD1		0.171157	0.414146	1.33279	3.61793	1.38401		0.195911	0.516848	2.35331	4.55529	1.90534
ENSMEUT00000001233	BICD2		5.01431	12.862	24.6299	32.2873	18.6984		8.95425	12.395	27.1465	45.5306	23.5066
ENSMEUT00000012796	BICDL1		0.83054	0.540532	0.796887	0.301044	0.617251		0.976688	0.408325	1.10476	0.359402	0.712294
ENSMEUT00000004463	BICDL2		50.9305	41.1042	47.157	33.9731	43.2912		47.2795	41.4815	39.4878	39.5447	41.9484
ENSMEUT00000016374	BICRA		4.98657	5.53489	3.14413	1.85358	3.87979		6.39099	6.07538	2.14144	2.71614	4.33099
ENSMEUT00000002180	BIN3		83.5122	92.8409	152.316	156.78	121.362		90.0958	91.4239	141.629	164.561	121.927
ENSMEUT00000001672	BIRC5		13.1047	13.839	23.6539	31.2885	20.4715		16.3552	15.9367	23.2	25.7416	20.3084
ENSMEUT00000005913	BIRC6		4.68063	5.4568	61.7334	70.1269	35.4994		4.86927	4.46088	62.9487	71.0039	35.8207
ENSMEUT00000011115	BLCAP		260.213	262.762	299.02	271.016	273.253		333.857	248.484	286.485	284.93	288.439
ENSMEUT00000007286	BLM		0.678931	0.46805	3.39433	3.37733	1.97966		0.770473	0.564576	3.7479	3.34272	2.10642
ENSMEUT00000008970	BLMH		17.6985	20.7963	24.2441	25.2769	22.0039		22.4844	25.0265	28.2249	29.7422	26.3695
ENSMEUT00000010125	BLNK		2.1028	5.09243	2.11038	5.65567	3.74032		2.10536	5.13939	3.11142	5.80357	4.03993
ENSMEUT00000003641	BLOC1S2		1010.92	898.647	408.04	363.082	670.172		850.61	909.823	314.8	381.766	614.25
ENSMEUT00000012668	BLOC1S6		15.0575	24.2525	82.7168	100.31	55.5842		20.4553	20.5243	91.6349	103.94	59.1386
ENSMEUT00000016812	BLVRA		42.5522	32.8753	84.6816	52.5168	53.1565		52.2257	31.0306	76.5346	47.6801	51.8678
ENSMEUT00000011272	BLVRB		55.8551	42.933	37.0485	32.1793	42.004		77.6314	63.0299	49.4661	39.6978	57.4563
ENSMEUT00000014576	BLZF1		10.7737	14.2884	40.116	48.4017	28.395		14.0534	12.7794	43.9751	45.5094	29.0793
ENSMEUT00000002783	BMF		1.61281	8.33798	22.4503	29.1628	15.391		5.01758	7.07034	19.7352	39.2766	17.7749
ENSMEUT00000007128	BMP1		7.55823	11.5802	7.75736	8.37745	8.81831		20.7081	21.475	15.9578	16.0741	18.5538
ENSMEUT00000004371	BMP10		0	0	0	0	0		0	0	0.24211	0	0.0605275
ENSMEUT00000014582	BMP2K		2.8224	2.70323	17.8309	16.5453	9.97546		3.11748	2.3092	19.6847	21.2662	11.5944
ENSMEUT00000015421	BMP4		28.9764	16.9011	17.9696	9.9651	18.453		34.0363	15.6534	22.8314	11.2722	20.9483
ENSMEUT00000000906	BMP5		0.0542237	0.306382	0.207557	0.507226	0.268847		0.10806	0.39792	0.420767	1.81177	0.684629
ENSMEUT00000016514	BMP6		8.79863	3.93633	15.4395	5.61775	8.44805		11.6253	3.29533	16.7083	7.56308	9.798
ENSMEUT00000007479	BMP7		0.712838	0.527669	1.73404	1.05284	1.00685		0.727396	0.333268	1.74857	0.850329	0.914891
ENSMEUT00000008464	BMPER		1.08935	0.505676	2.96978	1.60953	1.54358		1.26148	0.543242	3.35759	1.66233	1.70616
ENSMEUT00000002232	BMPR1B		2.5903	2.85885	36.7954	30.0527	18.0743		3.00912	2.37746	35.6054	36.3791	19.3428
ENSMEUT00000006447	BMPR2		1.06613	2.00608	43.3303	50.3137	24.1791		1.09786	1.31393	37.6872	55.3157	23.8537
ENSMEUT00000013315	BMS1		11.473	11.3008	31.2762	33.8624	21.9781		11.4829	11.4844	29.9431	34.2389	21.7873
ENSMEUT00000005027	BMT2		4.13624	5.22007	33.7571	38.3985	20.378		5.1398	4.21179	36.6727	33.6537	19.9195
ENSMEUT00000015720	BMX		0.309725	0.354365	1.03777	0.730771	0.608158		0.506286	0.196857	1.19829	0.867072	0.692126
ENSMEUT00000012402	BNC1		0.315154	0.144296	2.19829	1.13207	0.947453		0.481418	0.337848	1.98466	1.21585	1.00494
ENSMEUT00000016231	BNC2		0.139202	0.192358	3.58494	5.36427	2.32019		0.235166	0.409793	6.83308	10.8905	4.59213
ENSMEUT00000001012	BNIP1		6.52112	5.0684	27.3276	27.7478	16.6662		8.12268	5.51699	30.802	23.6581	17.0249
ENSMEUT00000014531	BNIP2		15.6402	14.1848	70.8145	76.4743	44.2784		16.1907	15.609	74.5665	88.7335	48.7749
ENSMEUT00000004528	BNIP3		72.9532	57.036	83.3616	51.8961	66.3117		113.61	76.6002	105.213	79.8506	93.8184
ENSMEUT00000011202	BNIP3L		31.0064	36.6114	85.8291	64.1464	54.3983		45.0607	35.9178	76.0146	71.2775	57.0677
ENSMEUT00000013098	BNIPL		33.0373	21.7757	43.7891	28.4667	31.7672		32.0861	19.2737	36.9246	34.0154	30.575
ENSMEUT00000003675	BOC		1.94847	3.93079	5.5426	8.08221	4.87602		4.51908	6.32714	10.6838	14.1499	8.91998
ENSMEUT00000003564	BOK		7.99882	9.9785	5.36702	7.05647	7.6002		10.9168	11.9294	6.2612	6.71043	8.95446
ENSMEUT00000011336	BOLL		1.32817	1.33348	9.82546	11.5653	6.0131		1.06931	0.905302	10.7127	6.83098	4.87957
ENSMEUT00000000462	BOP1		16.5181	26.6268	22.8907	29.1573	23.7982		20.181	26.4917	19.1709	31.1135	24.2393
ENSMEUT00000003645	BORA		12.2464	9.00077	19.518	16.1317	14.2242		11.4905	10.0823	18.3332	17.951	14.4643
ENSMEUT00000000857	BORCS5		32.8943	39.3874	29.5891	37.7773	34.912		25.8908	34.7127	25.087	38.9478	31.1596
ENSMEUT00000007806	BPGM		2.23884	4.32277	15.9331	13.9848	9.11988		3.6847	4.56194	14.8375	15.434	9.62953
ENSMEUT00000003738	BPHL		47.7037	18.5664	59.4721	31.5969	39.3348		53.8894	21.4987	61.4966	27.9825	41.2168
ENSMEUT00000012285	BPIFB3		0	0	0	0	0		0	0	0	0	0
ENSMEUT00000009380	BPIFB6		0	0	0	0	0		0.0460936	0	0	0.0825285	0.0321555
ENSMEUT00000001994	BPIFC		0.0193418	0.0181738	0	0	0.0093789		0	0.0175973	0	0	0.00439932
ENSMEUT00000010344	BPTF		5.32401	5.56853	43.8769	38.5523	23.3304		6.22458	4.59773	45.3382	42.1713	24.583
ENSMEUT00000015470	BRAF		1.50004	1.68212	40.3719	33.2132	19.1918		1.80921	1.73543	46.9133	40.4815	22.7349
ENSMEUT00000013031	BRAP		9.41241	13.5004	59.7804	57.5877	35.0702		13.441	12.2676	61.3356	60.7227	36.9417
ENSMEUT00000000887	BRAT1		16.2519	10.742	36.0103	23.4505	21.6137		19.1657	12.4847	35.5721	26.077	23.3249
ENSMEUT00000004435	BRCC3		111.603	124.571	101.326	115.172	113.168		106.656	124.119	97.8306	100.071	107.169
ENSMEUT00000002718	BRD1		10.4893	13.0813	47.0314	46.9022	29.376		12.3954	11.9101	42.9442	49.724	29.2434
ENSMEUT00000015307	BRD2		73.4924	85.0998	99.172	92.2677	87.508		87.3817	86.4295	91.936	106.891	93.1596
ENSMEUT00000004542	BRD3		4.03772	5.28216	38.705	32.7309	20.1889		5.72847	3.75672	40.1285	36.5757	21.5473
ENSMEUT00000009730	BRD4		12.9421	18.6527	33.9759	27.7341	23.3262		19.8709	20.6159	26.919	34.3908	25.4491
ENSMEUT00000002765	BRD7		44.8176	37.1108	69.6574	60.159	52.9362		47.6613	40.1744	64.7532	60.0407	53.1574
ENSMEUT00000001889	BRD8		51.6752	42.9719	99.8746	79.4328	68.4886		58.0782	48.0805	102.286	89.1101	74.3887
ENSMEUT00000004132	BRD9		34.5106	33.873	88.441	81.2505	59.5188		39.156	33.3779	89.2889	78.4249	60.0619
ENSMEUT00000007800	BRDT		0	0	0.623188	0.130621	0.188452		0	0	0.53909	0.137815	0.169226
ENSMEUT00000016311	BRF1		7.88354	6.79824	67.7424	46.2963	32.1801		8.71053	5.92171	68.2207	46.603	32.364
ENSMEUT00000013479	BRF2		11.401	13.3528	14.9385	14.1211	13.4533		14.5478	12.798	19.6254	20.6645	16.9089
ENSMEUT00000016343	BRI3		223.182	223.232	145.597	136.468	182.12		207.221	196.14	129.401	127.72	165.12
ENSMEUT00000011592	BRI3BP		12.3542	20.2867	61.1665	57.1709	37.7446		23.2424	16.3647	62.0244	61.1827	40.7035
ENSMEUT00000010235	BRICD5		2.71677	1.65643	2.98384	2.80677	2.54095		2.08596	1.60436	4.74331	2.31996	2.6884
ENSMEUT00000002241	BRINP1		0.483874	0.172715	0.575473	0.327665	0.389932		0.455347	0.167214	0.867997	0.422698	0.478314
ENSMEUT00000012723	BRINP2		1.21237	3.48282	1.84899	6.30136	3.21138		2.52702	3.31569	2.49617	3.8558	3.04867
ENSMEUT00000009410	BRINP3		3.9506	2.50208	13.676	10.5225	7.6628		2.43945	1.90473	6.64859	6.26797	4.31518
ENSMEUT00000004357	BRIP1		0	0	0.250633	0.219205	0.117459		0.0221489	0	0.786867	0.344597	0.288403
ENSMEUT00000016527	BRIX1		71.6102	68.949	76.2104	98.8911	78.9152		67.6415	75.7471	83.6378	87.0286	78.5138
ENSMEUT00000004141	BRMS1		71.5181	65.0733	46.2151	46.2931	57.2749		68.3438	64.28	38.6239	47.5775	54.7063
ENSMEUT00000011136	BRMS1L		4.3925	5.13993	32.4217	39.1306	20.2712		4.84743	6.53588	32.1103	34.7245	19.5545
ENSMEUT00000006140	BROX		19.6503	28.8873	149.403	228.444	106.596		23.5075	21.2298	137.568	186.495	92.2001
ENSMEUT00000005614	BRPF1		11.9647	26.2363	18.5181	26.6778	20.8492		13.0771	23.1084	13.8863	28.014	19.5214
ENSMEUT00000005139	BRPF3		4.2179	5.26403	20.264	14.974	11.18		7.00969	5.52645	18.6379	19.7766	12.7377
ENSMEUT00000011669	BRS3		0	0	0	0.0863821	0.0215955		0.0241624	0	0.0881325	0.0895991	0.0504735
ENSMEUT00000011093	BRSK1		11.1625	8.92722	5.52658	4.41042	7.50668		17.0701	14.8143	9.21905	6.96114	12.0161
ENSMEUT00000014289	BRSK2		0.0122207	0.114268	0.127571	0.170263	0.106081		0.181458	0.221613	0.599672	0.305239	0.326995
ENSMEUT00000011602	BRWD1		2.43046	2.39318	52.003	58.1212	28.737		2.71817	2.31454	59.7059	62.5856	31.8311
ENSMEUT00000013976	BRWD3		1.52843	0.577472	61.7143	41.3652	26.2964		0.638703	0.364474	57.4187	47.3206	26.4356
ENSMEUT00000009656	BSCL2		141.067	142.719	66.6161	54.5648	101.242		147.826	166.117	61.1306	73.0043	112.019
ENSMEUT00000011057	BSN		0.0418586	0.115351	0.26657	0.247945	0.167931		0.116126	0.100482	0.394942	0.437905	0.262364
ENSMEUT00000003350	BSPRY		3.29895	4.155	3.32383	4.30536	3.77079		2.8488	3.05769	3.6357	4.027	3.3923
ENSMEUT00000005734	BST1		0.0548977	0	0	0	0.0137244		0	0	0.21517	0	0.0537925
ENSMEUT00000005492	BSX		0	0	0	0	0		0	0	0	0	0
ENSMEUT00000013005	BTAF1		2.20808	2.39727	30.7399	36.005	17.8376		1.86078	2.05885	29.7306	35.599	17.3123
ENSMEUT00000014507	BTBD1		29.8685	40.0103	69.2408	91.4481	57.6419		36.512	41.8547	73.9266	85.426	59.4298
ENSMEUT00000002929	BTBD10		6.431	9.27885	21.3095	27.0761	16.0239		7.97045	9.66039	22.111	27.453	16.7987
ENSMEUT00000009841	BTBD11		0.161017	0.0936587	0.715175	0.824698	0.448637		0.227622	0.160566	0.968056	0.734039	0.522571
ENSMEUT00000002362	BTBD16		0.233439	0.24167	0.431157	0.595492	0.37544		0.30037	0.212988	0.959216	1.77746	0.812508
ENSMEUT00000013212	BTBD17		0.226681	0.407609	0.465393	1.05939	0.539768		0.34501	0.361802	0.524213	1.43428	0.666326
ENSMEUT00000006966	BTBD2		7.98323	11.2386	30.6411	28.1572	19.505		14.7173	13.165	29.5672	28.3842	21.4584
ENSMEUT00000006059	BTBD3		3.47869	3.90035	12.2621	10.6847	7.58146		4.70434	3.47585	15.2013	13.7269	9.2771
ENSMEUT00000016323	BTBD6		51.1666	28.9167	133.88	72.3444	71.5769		56.1704	25.0985	121.702	61.6178	66.1472
ENSMEUT00000014496	BTBD7		1.25732	1.32024	33.596	40.2936	19.1168		0.940139	0.623334	30.9468	38.6502	17.7901
ENSMEUT00000013561	BTD		2.96742	3.75248	9.12395	11.3024	6.78656		4.10515	3.7789	11.0451	11.6913	7.65511
ENSMEUT00000006147	BTF3L4		625.193	715.168	899.703	955.436	798.875		564.977	620.42	729.171	817.32	682.972
ENSMEUT00000001127	BTG1		142.765	167.81	108.065	94.6166	128.314		164.533	221.712	93.6795	117.557	149.37
ENSMEUT00000009044	BTG2		0	0	0	0	0		0	0	0	0	0
ENSMEUT00000004176	BTG4		1.83998	3.75932	4.82316	6.14293	4.14135		2.49127	4.07117	6.50907	8.42762	5.37478
ENSMEUT00000013754	BTK		0.400902	0.537359	0.890182	0.695862	0.631076		1.01692	0.739719	1.60346	1.25307	1.15329
ENSMEUT00000008126	BTN1A1		0.0351227	0.0494189	0.124437	0.797118	0.251524		0.0173922	0.0159202	0.755134	0.256393	0.26121
ENSMEUT00000013622	BTRC		4.07314	5.29103	33.9311	30.1554	18.3627		5.22711	4.23757	30.653	32.7443	18.2155
ENSMEUT00000009388	BUB1		0.129592	0.0979222	0.36206	0.452823	0.260599		0.300312	0.221799	1.22619	0.745017	0.623329
ENSMEUT00000003971	BUB1B		0.177962	0.2398	0.605352	0.498583	0.380424		0.327601	0.286946	0.838114	0.887578	0.58506
ENSMEUT00000010204	BUB3		23.6114	24.7298	67.7196	55.3945	42.8638		33.3315	26.9655	68.3423	58.9692	46.9021
ENSMEUT00000016615	BUD23		61.3666	73.1424	47.6113	47.2582	57.3446		67.5375	73.7513	47.8059	53.3114	60.6015
ENSMEUT00000006934	BUD31		269.486	279.335	267.163	273.713	272.424		258.405	298.831	263.381	278.612	274.807
ENSMEUT00000008514	BVES		3.44074	2.90246	5.16687	4.42182	3.98297		3.00827	2.56495	5.66148	3.61726	3.71299
ENSMEUT00000000761	BYSL		4.11991	11.6379	11.5544	15.5908	10.7258		6.32823	12.3868	9.26602	17.522	11.3758
ENSMEUT00000009876	BZW1		39.228	51.8495	120.951	159.875	92.9759		51.7198	53.9045	141.019	146.71	98.3383
ENSMEUT00000000862	BZW2		4.09362	2.92975	3.76357	2.65913	3.36152		5.86708	3.83594	5.01481	4.02855	4.68659
ENSMEUT00000007654	C10orf10		29.4716	36.4746	13.0948	15.3196	23.5901		39.0048	49.8547	19.7792	22.495	32.7834
ENSMEUT00000013703	C10orf107		9.84106	14.9372	11.856	18.5237	13.7895		10.6237	19.5751	11.5437	23.2763	16.2547
ENSMEUT00000012245	C10orf35		9.09534	12.9482	5.5257	5.58589	8.28878		13.5136	11.8743	11.299	5.32756	10.5036
ENSMEUT00000009843	C10orf71		0	0	0	0.0225196	0.0056299		0	0	0.0232776	0.0476006	0.0177196
ENSMEUT00000007758	C10orf76		17.5738	29.842	61.6176	85.2365	48.5675		18.571	29.5139	58.0802	78.0735	46.0596
ENSMEUT00000013392	C10orf90		0.402072	0.264895	0.669556	0.376853	0.428344		0.545245	0.268333	1.0095	0.936766	0.689961
ENSMEUT00000003087	C11orf1		9.01035	9.86394	28.9419	16.4626	16.0697		11.0198	11.327	19.7946	22.3247	16.1165
ENSMEUT00000003285	C11orf42		0.390115	0.987394	0.525101	0.798877	0.675372		0.110043	1.22935	0.350297	0.986366	0.669014
ENSMEUT00000004558	C11orf49		16.3452	21.0084	20.488	18.9919	19.2084		21.4657	23.5758	20.5865	21.2326	21.7152
ENSMEUT00000015438	C11orf52		55.3319	35.684	50.787	30.7351	43.1345		48.2264	33.7141	31.9962	23.5288	34.3664
ENSMEUT00000004838	C11orf53		0	0	0	0	0		0.0352303	0	0	0	0.00880757
ENSMEUT00000008557	C11orf54		13.2136	12.6984	38.4176	39.5173	25.9617		16.78	14.3384	50.2313	37.9088	29.8146
ENSMEUT00000005441	C11orf57		11.8004	14.8777	71.7717	64.8783	40.832		18.4742	14.1441	61.0161	63.5662	39.3002
ENSMEUT00000011819	C11orf58		184.871	245.116	282.759	333.198	261.486		212.736	250	290.649	345.605	274.748
ENSMEUT00000015811	C11orf63		4.75417	6.55957	8.38437	16.7011	9.0998		6.2144	8.54288	12.2833	18.421	11.3654
ENSMEUT00000009314	C11orf68		10.9376	12.4098	12.955	10.0115	11.5785		16.4701	14.255	14.187	14.2239	14.784
ENSMEUT00000003076	C11orf74		45.6023	46.7769	47.1437	47.147	46.6675		39.7602	45.0429	43.6541	58.2822	46.6848
ENSMEUT00000014812	C11orf84		4.73047	7.58587	1.56799	1.93818	3.95563		5.74373	8.23103	1.66054	3.22545	4.71519
ENSMEUT00000004985	C11orf86		0	0	0	0	0		0.220647	0	0	0	0.0551618
ENSMEUT00000010209	C11orf88		14.8198	27.9654	19.4415	38.9002	25.2817		16.5853	38.0696	26.9152	49.805	32.8438
ENSMEUT00000012145	C12orf10		140.675	110.454	78.0269	54.8532	96.0023		143.821	107.099	73.6262	65.69	97.559
ENSMEUT00000010548	C12orf29		10.637	13.8342	32.2356	39.5352	24.0605		13.2458	14.9067	33.1878	38.4692	24.9524
ENSMEUT00000013950	C12orf50		0.0238534	0.0224302	0.0899551	0.175745	0.0779959		0.0237674	0.0437786	0.0910662	0.554409	0.178255
ENSMEUT00000009299	C12orf56		0.0207443	0.370175	0.537171	2.64866	0.894188		0.0822871	0.567875	0.54081	2.28591	0.869221
ENSMEUT00000009451	C12orf65		86.524	53.3789	67.5668	63.7414	67.8028		73.1688	65.6057	75.561	72.1604	71.624
ENSMEUT00000010003	C12orf66		4.79403	9.15661	2.68405	6.57086	5.80139		4.86977	8.73614	2.6269	7.03681	5.8174
ENSMEUT00000014280	C12orf73		138.186	101.075	36.0469	25.407	75.1787		116.589	100.325	52.7689	46.6363	79.0798
ENSMEUT00000008583	C12orf74		1.23187	0.348095	26.2583	2.94325	7.69538		3.1157	0.168281	30.9204	4.35184	9.63906
ENSMEUT00000009938	C14orf1		92.0448	93.073	65.5731	53.9755	76.1666		110.398	87.6058	71.9124	65.934	83.9625
ENSMEUT00000001632	C14orf159		0.29774	0.237655	3.30456	1.9881	1.45701		0.412465	0.298061	3.37799	2.45169	1.63505
ENSMEUT00000013577	C14orf37		0.145535	0.308389	5.13795	9.17839	3.69257		0.252069	0.409284	6.32546	9.68528	4.16802
ENSMEUT00000005775	C14orf39		0.0504429	0.175261	0.337944	0.459286	0.255733		0.0667094	0.0779374	0	0.210153	0.0886999
ENSMEUT00000012734	C14orf79		2.65135	4.22991	3.15167	4.9584	3.74783		3.86672	3.36268	5.20383	5.51644	4.48742
ENSMEUT00000005338	C14orf93		9.14287	9.2478	11.4816	10.135	10.0018		10.2047	8.20886	11.8706	10.9518	10.309
ENSMEUT00000002514	C15orf39		2.22617	4.28395	2.51869	3.84257	3.21785		2.9563	4.543	1.79733	4.5403	3.45923
ENSMEUT00000013173	C15orf48		0	0	3.64033	3.56518	1.80138		0	1.07266	0	5.68815	1.6902
ENSMEUT00000003557	C15orf52		5.72828	4.56864	6.18361	5.76223	5.56069		7.31584	5.33497	8.31805	6.23077	6.79991
ENSMEUT00000013175	C15orf57		34.6174	32.5751	35.9771	38.948	35.5294		40.4054	39.5092	50.1583	44.1124	43.5463
ENSMEUT00000003896	C15orf59		0.679063	0.803071	0.589785	0.883003	0.73873		1.13148	1.55194	1.2846	0.909778	1.21945
ENSMEUT00000000863	C15orf61		9.43773	10.5778	4.66276	5.97958	7.66447		9.42888	11.3913	5.46749	7.01571	8.32584
ENSMEUT00000005665	C15orf62		3.62979	2.57154	5.46089	2.56247	3.55617		4.66796	3.17555	4.38483	4.28028	4.12716
ENSMEUT00000005346	C16orf45		0	0	0	0	0		0	0	0	0	0
ENSMEUT00000006706	C16orf58		42.0386	38.8907	35.202	33.3511	37.3706		44.5804	40.3183	34.3607	38.4997	39.4398
ENSMEUT00000006812	C16orf59		4.79104	6.48704	4.04323	4.21228	4.8834		7.65459	8.91967	4.57707	7.06804	7.05484
ENSMEUT00000005790	C16orf62		24.7823	17.0099	76.0046	52.2091	42.5015		30.2502	19.3934	83.2616	52.4519	46.3393
ENSMEUT00000001825	C16orf70		11.0162	13.1913	34.1181	37.8508	24.0441		12.6922	12.5588	33.5612	40.0103	24.7056
ENSMEUT00000008775	C16orf72		42.8335	60.2965	86.8325	98.6123	72.1437		48.5263	54.6434	89.692	105.759	74.6552
ENSMEUT00000015016	C16orf74		42.6179	121.588	38.8804	74.3565	69.3607		59.1097	135.589	25.1937	88.854	77.1866
ENSMEUT00000009406	C16orf86		7.66516	8.83594	6.02422	5.25203	6.94434		10.9433	14.4032	7.28814	11.9513	11.1465
ENSMEUT00000015900	C16orf87		34.8925	47.9189	86.4444	104.596	68.463		45.1342	47.1872	99.6861	105.542	74.3874
ENSMEUT00000005693	C16orf90		0.0511522	0	0.158328	0	0.0523701		0	0.0458504	0	0.162784	0.0521586
ENSMEUT00000012250	C17orf107		0.496441	0.564591	0.901997	0	0.490757		0.712335	0.502784	0.730446	0.933212	0.719694
ENSMEUT00000015901	C17orf50		11.3314	13.5015	10.6283	12.5038	11.9913		12.3059	18.255	10.8584	18.3467	14.9415
ENSMEUT00000015819	C17orf53		0.729945	0.312848	2.78687	1.60981	1.35987		0.990939	0.534244	3.09811	2.47969	1.77575
ENSMEUT00000009733	C17orf64		0	0	0.128211	0.253046	0.0953142		0	0.0329814	0.259246	0	0.0730568
ENSMEUT00000014791	C17orf75		34.7796	36.6541	55.2988	59.6057	46.5846		40.4744	37.3683	54.447	56.0039	47.0734
ENSMEUT00000009192	C17orf78		0	0	0	0	0		0.0920982	0	0	0	0.0230246
ENSMEUT00000001184	C17orf98		0.801279	0.678908	0.812556	1.64049	0.983308		0.872722	0.805445	0.545309	1.95115	1.04366
ENSMEUT00000005029	C18orf25		4.78198	7.25023	39.6035	44.9177	24.1384		5.84763	4.81149	38.5406	50.8565	25.0141
ENSMEUT00000016751	C18orf32		337.496	435.915	288.43	382.296	361.034		366.222	411.021	307.824	310.242	348.827
ENSMEUT00000014793	C18orf54		0.754348	0.65455	5.09513	8.55703	3.76526		0.837591	0.677892	7.35916	9.52203	4.59917
ENSMEUT00000010874	C18orf63		0	0	0	0.170575	0.0426438		0	0	0.0588662	0.119817	0.0446708
ENSMEUT00000016631	C18orf8		20.2899	23.3979	42.3444	50.6119	34.161		20.2995	23.8802	39.0763	43.3658	31.6555
ENSMEUT00000000746	C19orf35		0.097248	0.399605	0.370268	0.313739	0.295215		0.556292	0.683253	0.619135	0.507704	0.591596
ENSMEUT00000014765	C19orf44		9.96337	8.88991	26.5333	20.8411	16.5569		10.6169	9.46293	24.3848	23.2392	16.926
ENSMEUT00000002079	C19orf47		13.7566	14.8269	23.5506	19.3039	17.8595		18.5054	15.6041	22.4358	23.2665	19.953
ENSMEUT00000008573	C19orf53		367.452	389.876	305.532	307.657	342.629		386.286	350.398	275.464	295.102	326.812
ENSMEUT00000007949	C19orf66		162.803	130.312	115.857	80.4992	122.368		149.69	129.468	89.506	89.142	114.451
ENSMEUT00000002150	C19orf67		0.253587	0.27098	2.92822	1.96404	1.35421		0.500495	0.196527	3.34014	2.01648	1.51341
ENSMEUT00000012978	C19orf71		0.133447	0.2483	1.78256	4.46459	1.65722		0.066308	0.362831	2.68685	5.30023	2.10405
ENSMEUT00000009052	C1orf106		0.59371	0.400818	1.07303	0.376422	0.610995		1.0103	0.399506	1.64355	1.44091	1.12357
ENSMEUT00000006446	C1orf109		15.8145	11.0588	31.0199	23.6309	20.381		17.7801	12.7833	31.5627	21.1059	20.808
ENSMEUT00000007676	C1orf112		0.525665	0.619975	2.12599	2.21788	1.37238		0.782947	0.702632	2.72584	2.70201	1.72836
ENSMEUT00000009517	C1orf115		25.6814	34.4377	49.4957	43.0435	38.1646		45.0287	41.092	68.8624	54.0272	52.2526
ENSMEUT00000014796	C1orf116		1.22811	1.67015	2.24027	2.00452	1.78576		1.94429	1.47007	1.60876	1.82604	1.71229
ENSMEUT00000001775	C1orf123		109.743	89.5844	54.1077	53.7789	76.8035		107.244	105.022	57.5757	51.3525	80.2986
ENSMEUT00000005907	C1orf131		14.8334	14.8114	18.9011	21.7321	17.5695		14.2365	15.5607	20.8905	22.8738	18.3904
ENSMEUT00000007448	C1orf145		0	0	0	0	0		0	0	0	0	0
ENSMEUT00000013350	C1orf146		0	0	1.74928	0.740725	0.622501		0.0659102	0.0611733	2.54742	1.29734	0.992961
ENSMEUT00000006216	C1orf158		2.07586	2.66778	2.18953	10.2877	4.30522		1.71243	3.01385	2.632	7.21792	3.64405
ENSMEUT00000004849	C1orf174		17.1753	19.1248	58.0412	56.2019	37.6358		25.9752	20.3761	65.0039	48.9587	40.0785
ENSMEUT00000012754	C1orf194		31.5597	58.8351	7.81572	13.6222	27.9582		40.9116	80.0958	9.63645	23.8232	38.6168
ENSMEUT00000001527	C1orf198		7.43198	12.7196	41.9674	40.9034	25.7556		14.6576	9.95637	38.7634	42.9535	26.5827
ENSMEUT00000002860	C1orf210		196.458	141.3	103.847	57.2614	124.717		175.855	112.769	90.7548	71.5541	112.733
ENSMEUT00000000382	C1orf216		1.94389	2.45515	1.02575	0.129581	1.38859		5.71971	5.52771	1.67585	1.18687	3.52754
ENSMEUT00000008095	C1orf228		1.44585	3.16915	1.37944	3.27604	2.31762		2.52964	4.36101	2.24509	5.01559	3.53783
ENSMEUT00000015858	C1orf27		14.66	15.8316	85.2568	100.651	54.0999		15.207	14.7182	83.3012	87.6625	50.2222
ENSMEUT00000002606	C1orf43		186.222	215.845	301.053	266.087	242.302		210.992	203.578	241.486	274.148	232.551
ENSMEUT00000010281	C1orf50		28.904	29.6955	38.8869	40.0761	34.3906		30.6668	30.1335	40.1489	50.8202	37.9423
ENSMEUT00000013586	C1orf74		6.89043	10.2937	20.2833	15.3872	13.2137		7.69572	7.92253	15.7235	17.3486	12.1726
ENSMEUT00000012370	C1orf87		4.70594	8.16061	16.1511	26.9513	13.9922		7.38432	10.6269	15.0134	35.2307	17.0638
ENSMEUT00000007688	C1orf94		0.0405563	0.0190209	0.0674329	0	0.0317525		0.0804296	0.0916303	0	0	0.043015
ENSMEUT00000014922	C1QBP		250.242	312.479	239.372	275.911	269.501		236.601	301.393	215.097	251.116	251.052
ENSMEUT00000008332	C1QC		8.12038	10.4877	17.7391	13.1783	12.3814		28.8312	20.6229	30.4302	26.4123	26.5741
ENSMEUT00000016172	C1QL1		0.236809	0.158155	0.21402	0	0.152246		1.40863	1.03695	0.432023	0.443021	0.830156
ENSMEUT00000016252	C1QL2		0.0603237	0	0	0	0.0150809		0	0	0	0	0
ENSMEUT00000014722	C1QL4		0.823536	1.13853	0.127682	0.527763	0.654378		1.29257	1.10045	0.128765	1.05308	0.893716
ENSMEUT00000007015	C1QTNF12		28.285	7.02914	15.1727	6.05446	14.1353		33.415	4.65415	17.7299	8.69413	16.1233
ENSMEUT00000014798	C1QTNF2		1.76305	1.71073	2.39694	3.10343	2.24354		4.19796	3.14645	5.61641	2.46497	3.85645
ENSMEUT00000003051	C1QTNF5		1.7858	4.07977	0.408093	1.66853	1.98555		3.00384	6.48017	1.64442	3.56454	3.67324
ENSMEUT00000007734	C1QTNF6		0.415849	0.774705	0.245357	0.49495	0.482715		1.56909	0.987577	0.497077	0.508599	0.890586
ENSMEUT00000002000	C1QTNF7		4.00171	4.09735	5.34599	6.00502	4.86252		7.36603	9.47744	12.7685	11.5771	10.2973
ENSMEUT00000009726	C1QTNF8		0	0.061744	0	0	0.015436		0	0	0	0.708863	0.177216
ENSMEUT00000015389	C1S		38.8285	44.306	80.8493	61.2591	56.3107		95.6769	56.0746	152.448	83.9817	97.0453
ENSMEUT00000006028	C2		3.67432	4.06491	6.57657	3.15584	4.36791		14.505	6.78797	13.4585	6.42584	10.2943
ENSMEUT00000016679	C20orf194		1.64313	2.52507	16.7097	15.3938	9.06793		2.70886	1.94478	18.7021	17.519	10.2187
ENSMEUT00000012489	C20orf196		10.9554	8.72373	33.2938	27.783	20.189		10.9146	6.98642	37.3405	24.4784	19.93
ENSMEUT00000006867	C20orf24		108.211	128.047	82.8049	96.1736	103.809		143.07	136.553	92.8645	122.081	123.642
ENSMEUT00000002332	C20orf85		11.2921	13.4908	40.6575	41.5939	26.7586		11.1358	14.8278	32.1596	41.4664	24.8974
ENSMEUT00000014448	C22orf23		66.4707	71.5943	34.3292	36.8704	52.3162		57.7552	84.6898	27.7011	49.7928	54.9847
ENSMEUT00000004335	C22orf31		0.0346487	0	0.234807	0	0.0673639		0	0.0314709	0.237236	0.727072	0.248945
ENSMEUT00000015508	C2CD2L		44.636	67.383	44.959	50.1248	51.7757		38.2042	56.5935	28.0873	50.4375	43.3306
ENSMEUT00000000602	C2CD3		1.43999	1.51241	18.2732	18.7689	9.99863		1.5255	0.992936	16.7474	19.5249	9.69768
ENSMEUT00000007404	C2CD5		6.82765	6.14387	31.4583	34.6854	19.7788		6.6222	4.75806	35.4075	35.947	20.6837
ENSMEUT00000007959	C2orf40		6.72029	9.42863	15.9642	15.4629	11.894		22.8054	16.114	33.3592	22.3425	23.6553
ENSMEUT00000009674	C2orf42		9.56984	11.6976	36.3698	32.4485	22.5214		12.7922	12.8844	40.1232	38.8043	26.151
ENSMEUT00000000358	C2orf49		1.6232	6.00317	18.2705	53.5062	19.8508		3.72773	6.01101	23.5855	46.8222	20.0366
ENSMEUT00000004575	C2orf50		1.72295	5.80523	3.61428	6.81644	4.48972		3.66054	6.88674	2.09404	11.5119	6.03831
ENSMEUT00000001839	C2orf54		2.10162	3.21532	4.66064	3.24793	3.30638		3.4543	2.74418	4.12247	3.27576	3.39918
ENSMEUT00000016745	C2orf66		0	0	0	0	0		0.270569	0.247807	0	0	0.129594
ENSMEUT00000015220	C2orf68		34.6739	34.1818	25.7384	21.3654	28.9899		38.9699	39.5581	24.9509	23.8585	31.8344
ENSMEUT00000000142	C2orf69		3.36943	5.29107	17.7724	22.8513	12.321		5.65693	4.23145	21.1575	24.3342	13.845
ENSMEUT00000011906	C2orf70		75.7606	112.166	58.9202	89.1332	83.995		92.2032	161.29	52.9992	124.822	107.829
ENSMEUT00000011857	C2orf71		0.00638708	0	0	0.0430517	0.0123597		0	0	0.0436369	0	0.0109092
ENSMEUT00000000777	C2orf76		37.9016	44.9697	36.8017	46.1144	41.4468		34.2456	46.4155	39.9353	55.5367	44.0333
ENSMEUT00000009768	C2orf78		0.0107307	0.0100416	0	0	0.00519308		0	0	0	0	0
ENSMEUT00000014231	C2orf82		0.186884	0.525181	0.957228	0.4907	0.539998		0.742986	0.8526	0	0.995802	0.647847
ENSMEUT00000012509	C2orf88		10.7107	45.9285	57.1686	92.4729	51.5702		5.53578	33.8124	30.7278	99.3578	42.3584
ENSMEUT00000006310	C3		0.696763	1.31583	1.72129	3.93092	1.9162		16.7198	2.15719	5.20508	3.53683	6.90472
ENSMEUT00000013124	C3orf14		118.773	114.168	137.332	138.586	127.215		119.07	110.229	144.987	134.563	127.212
ENSMEUT00000003469	C3orf18		1.3057	0.61287	2.71307	2.18993	1.70539		1.61867	0.44699	4.38453	2.80795	2.31454
ENSMEUT00000008887	C3orf20		0.0127396	0.0119864	0	0.0916638	0.0290975		0.0126376	0	0.187077	0.0476518	0.0618416
ENSMEUT00000011021	C3orf33		22.609	33.4975	23.5903	38.0414	29.4346		18.7989	33.5953	17.7571	34.5287	26.17
ENSMEUT00000011642	C3orf38		64.3267	67.0892	115.132	137.537	96.0212		64.5283	67.2867	124.699	131.926	97.11
ENSMEUT00000006338	C3orf49		0	0	0	0.138551	0.0346378		0	0	0	0	0
ENSMEUT00000003690	C3orf58		1.77242	3.90322	12.5857	16.2143	8.61891		5.17385	4.17678	19.8388	23.7273	13.2292
ENSMEUT00000005582	C3orf62		22.0473	12.5576	35.467	21.4271	22.8747		24.0538	16.4555	33.6581	27.734	25.4753
ENSMEUT00000007911	C3orf67		30.3498	37.9183	79.3648	75.0713	55.6761		37.9719	38.6384	79.5346	80.4996	59.1611
ENSMEUT00000007683	C3orf70		0.118678	0.184558	1.18927	0.663902	0.539102		0.902016	0.92837	1.87619	2.31525	1.50546
ENSMEUT00000002062	C4orf22		2.98972	3.44977	4.57663	4.8657	3.97046		3.51141	3.69696	7.95344	5.72556	5.22184
ENSMEUT00000010597	C4orf33		9.52638	7.83031	11.6181	7.18673	9.04038		11.4845	8.67258	16.8374	11.1736	12.042
ENSMEUT00000007862	C4orf36		0	0.195744	0	0	0.048936		0.207967	0.190829	0	0	0.099699
ENSMEUT00000002525	C4orf45		0.0874312	0	0	0.606077	0.173377		0	0.0800444	0	0	0.0200111
ENSMEUT00000013045	C5		0.00543331	0.0153747	0.0207786	0.203149	0.0611839		0.425011	0.0199496	0.0209959	0.10711	0.143267
ENSMEUT00000001783	C5orf15		99.4362	124.89	187.857	175.023	146.802		146.267	124.651	184.885	162.728	154.633
ENSMEUT00000008502	C5orf22		0.871113	0.697172	5.8742	5.90852	3.33775		0.541037	0.326103	3.46853	4.74455	2.27006
ENSMEUT00000005791	C5orf24		5.21455	10.3622	32.9581	52.5764	25.2778		8.64726	8.93392	31.3945	52.4571	25.3582
ENSMEUT00000006719	C5orf30		1.15186	2.98552	3.13575	2.88758	2.54018		3.4204	2.95097	6.35442	4.4193	4.28627
ENSMEUT00000002458	C5orf34		2.16467	1.21672	5.00009	3.82559	3.05177		2.27108	1.6966	6.08145	5.39011	3.85981
ENSMEUT00000002533	C5orf46		1.1666	1.82791	0	0	0.748628		0	0.3542	0	0	0.08855
ENSMEUT00000007000	C5orf51		19.1261	20.0883	46.8049	57.6295	35.9122		19.2648	19.9729	48.965	49.5699	34.4432
ENSMEUT00000008058	C5orf52		9.24089	16.1704	8.44778	18.5673	13.1066		15.2778	22.3346	12.2125	23.5239	18.3372
ENSMEUT00000009789	C5orf63		23.8834	15.1045	32.5159	32.0226	25.8816		19.6693	19.4347	29.78	18.3036	21.7969
ENSMEUT00000001121	C6		0.0193227	0	0.107436	0.0352806	0.0405098		0.39194	0	0.0360978	0.0737134	0.125438
ENSMEUT00000000998	C6orf15		0	0.135968	0.0947264	0	0.0576736		0.0288419	0	0.0950865	0.0972521	0.0552951
ENSMEUT00000013569	C6orf203		30.6342	33.9596	48.3877	62.0841	43.7664		30.2838	36.4313	44.7758	51.1583	40.6623
ENSMEUT00000004648	C6orf58		1.91179	1.07998	2.12263	1.17834	1.57319		0.654564	0.669181	0.803929	1.37399	0.875416
ENSMEUT00000000520	C6orf62		130.209	120.593	280.115	242.663	193.395		158.672	114.182	269.51	231.045	193.352
ENSMEUT00000001003	C6orf89		38.8232	41.6035	184.588	173.768	109.696		35.937	24.9247	173.284	176.272	102.604
ENSMEUT00000002451	C7		1.48612	1.50279	1.86284	2.32545	1.7943		3.67786	2.4591	5.34376	4.41368	3.9736
ENSMEUT00000015187	C7orf25		8.86148	12.5981	10.6837	11.0926	10.809		10.1509	12.0616	7.78231	12.15	10.5362
ENSMEUT00000012786	C7orf31		0.0189959	0.0354991	0.878448	0.335567	0.317128		0.0187611	0.0344877	0.542935	0.694402	0.322646
ENSMEUT00000006786	C7orf43		30.1021	37.6333	29.8591	29.5403	31.7837		31.3363	36.304	28.4495	35.4736	32.8909
ENSMEUT00000012675	C7orf49		12.0041	25.8943	36.0594	47.3722	30.3325		16.9187	21.6602	32.5647	46.819	29.4907
ENSMEUT00000014584	C7orf50		7.52864	7.59397	25.3606	30.5624	17.7614		8.50094	8.9682	27.9424	35.8351	20.3117
ENSMEUT00000001600	C7orf57		3.77046	6.43855	3.11262	7.52252	5.21104		5.85248	7.22113	5.07358	9.49075	6.90949
ENSMEUT00000002789	C8A		0.0469183	0.102599	0	0	0.0373793		3.47923	0.113555	0.0550211	0.0564134	0.926055
ENSMEUT00000005319	C8orf22		0.316897	0.592679	0	0	0.227394		0.314894	0.288031	0	1.08476	0.421921
ENSMEUT00000012738	C8orf34		1.50756	3.48761	10.2741	19.4869	8.68904		2.6575	3.63559	15.2308	24.333	11.4642
ENSMEUT00000010127	C8orf37		23.6909	37.6774	52.0045	68.6399	45.5032		35.9142	38.991	53.7032	64.5785	48.2967
ENSMEUT00000016080	C8orf4		49.5637	99.7893	48.9828	122.419	80.1887		77.0523	138.3	64.043	117.706	99.2753
ENSMEUT00000008837	C8orf46		0.11395	0.161031	0	0.213273	0.122064		0	0.105038	0.436924	0.223559	0.19138
ENSMEUT00000000810	C8orf74		0	0	3.03239	1.05307	1.02136		0.0495033	0.0458004	1.64189	0.741661	0.619714
ENSMEUT00000007183	C8orf82		34.4553	49.1771	39.3525	37.5891	40.1435		39.2097	44.8157	41.6985	42.1255	41.9624
ENSMEUT00000005835	C9		0.0402277	0.171138	0.225408	0.518965	0.238935		3.29693	0.423931	0.454413	0.542184	1.17936
ENSMEUT00000016181	C9orf135		0.111778	0.052581	0.402143	0.394893	0.240349		0.223088	0.0508488	0.204739	0.625698	0.276093
ENSMEUT00000009507	C9orf142		101.612	119.418	49.4698	64.4044	83.7261		82.3275	117.372	47.0034	59.5579	76.5652
ENSMEUT00000002002	C9orf24		0.198698	0.0931094	0.671327	0.84429	0.451856		0	0.181415	0.848168	0.861822	0.472851
ENSMEUT00000011460	C9orf40		4.87347	5.0175	2.72216	2.61586	3.80725		6.63575	7.80015	1.90815	5.12946	5.36838
ENSMEUT00000009048	C9orf72		3.49449	4.42258	31.239	28.4449	16.9002		5.46011	4.0333	34.6227	28.3398	18.114
ENSMEUT00000013560	C9orf84		0	0.00559016	0.0448738	0.0881729	0.0346592		0.00588511	0.125161	0.0906099	0.393423	0.15377
ENSMEUT00000008075	C9orf85		20.6884	26.2575	50.4525	49.2711	36.6674		24.5169	28.4898	50.3711	47.2104	37.6471
ENSMEUT00000006416	CA1		0	0	0.483764	0	0.120941		0	0	0	0	0
ENSMEUT00000012887	CA10		0	0.126372	0.122456	0.243297	0.123031		0.301488	0.123285	0.370974	0.2531	0.262212
ENSMEUT00000000667	CA11		15.2718	10.4426	14.9615	9.62756	12.5759		10.9547	8.99943	9.69599	10.7541	10.1011
ENSMEUT00000003974	CA12		1.18334	0.880871	4.31519	3.72636	2.52644		1.65778	1.21992	4.35336	3.97107	2.80053
ENSMEUT00000002403	CA13		9.65498	9.32746	10.9062	13.1899	10.7696		11.6648	10.2238	13.9609	10.8536	11.6758
ENSMEUT00000006822	CA14		0.563628	0.665423	2.2578	2.62567	1.52813		1.14601	0.831073	3.01447	2.61092	1.90062
ENSMEUT00000016575	CA2		155.39	134.518	260.206	236.211	196.581		135.519	101.772	178.632	175.146	147.767
ENSMEUT00000000902	CA3		0.75782	1.14877	1.92169	8.61563	3.11098		0.92028	2.96379	1.34154	6.10995	2.83389
ENSMEUT00000011413	CA5B		13.9884	11.4208	34.8781	30.5965	22.721		18.9279	17.2897	48.4561	41.7301	31.6009
ENSMEUT00000007022	CA7		1.91449	43.6431	1.11669	29.575	19.0623		2.94492	63.5808	3.05095	43.0256	28.1506
ENSMEUT00000008586	CA8		0.0362046	0.0677356	0.401757	0.780125	0.321456		0.28653	0.098392	0.541884	0.690732	0.404385
ENSMEUT00000012071	CAAP1		22.8007	27.9569	61.6156	85.8245	49.5494		26.1492	28.4985	66.6889	82.5622	50.9747
ENSMEUT00000000486	CAB39		21.7134	34.5596	141.735	181.638	94.9115		28.5706	33.7436	137.547	165.525	91.3466
ENSMEUT00000000045	CAB39L		4.36016	9.95501	14.5443	39.6073	17.1167		5.53497	11.0182	20.9128	32.4518	17.4794
ENSMEUT00000012110	CABIN1		22.2518	21.3772	27.7057	18.9898	22.5811		26.443	25.8075	22.9021	25.3997	25.1381
ENSMEUT00000015898	CABLES2		3.78016	5.35426	24.0844	30.1121	15.8327		5.43663	3.8084	28.881	34.4886	18.1537
ENSMEUT00000006400	CABP2		0.0519381	0	0	0	0.0129845		0	0.0471712	0	0	0.0117928
ENSMEUT00000014199	CABP5		0	0	0	0	0		0	0	0	0	0
ENSMEUT00000007980	CABP7		0.128928	0.0607387	0	0	0.0474167		0	0.11774	0	0	0.029435
ENSMEUT00000012939	CABYR		0.0560329	0.245438	1.28352	1.13999	0.681245		0.222245	0.187038	1.29308	1.32085	0.755803
ENSMEUT00000000591	CACHD1		3.59256	3.61156	14.8091	9.78814	7.95034		5.55878	3.89172	16.6496	13.3633	9.86585
ENSMEUT00000009423	CACNA1A		0.0353644	0.0723044	0.177023	0.431637	0.179082		0.089184	0.0612389	0.400526	0.500501	0.262862
ENSMEUT00000003215	CACNA1B		0.1745	0.179791	0.954208	0.965723	0.568555		0.288434	0.189148	1.46496	1.22692	0.792366
ENSMEUT00000005063	CACNA1C		0.473405	1.26709	3.48531	8.5827	3.45213		0.719842	1.39304	5.4772	11.087	4.66927
ENSMEUT00000012764	CACNA1D		0.245358	0.719274	1.29432	4.01646	1.56885		0.530282	0.776154	2.445	6.09931	2.46269
ENSMEUT00000006155	CACNA1E		3.07342	9.89562	11.4337	37.2514	15.4135		1.2035	4.82638	5.86207	26.5891	9.62026
ENSMEUT00000008911	CACNA1F		0.639599	0.952457	1.39889	1.60673	1.14942		0.879314	0.384658	2.31936	2.65639	1.55993
ENSMEUT00000012574	CACNA1G		0.839258	1.87428	1.72354	1.52879	1.49147		2.56769	1.9589	2.98542	2.73226	2.56107
ENSMEUT00000010348	CACNA1H		1.27429	1.75083	2.69292	1.73256	1.86265		2.19304	2.39387	3.886	4.68559	3.28963
ENSMEUT00000008152	CACNA1I		0.00415934	0	0	0	0.00103984		0.00823233	0	0	0	0.00205808
ENSMEUT00000016095	CACNA1S		0.00875241	0.0164317	0.0151795	0	0.0100909		0.00433702	0.00794057	0	0	0.0030694
ENSMEUT00000004117	CACNA2D1		0.198085	0.162167	5.1349	4.67867	2.54346		0.307752	0.188903	10.1221	9.45281	5.01789
ENSMEUT00000009090	CACNA2D2		0.225547	0.423093	0.648456	0.270398	0.391873		0.716563	0.458697	1.16724	0.444818	0.69683
ENSMEUT00000008978	CACNA2D3		0.0250206	0.0235217	0.0615562	0.243631	0.0884324		0.0248021	0.0761436	0.217372	0.349193	0.166878
ENSMEUT00000013966	CACNA2D4		0.213785	0.762305	0.993039	2.74858	1.17943		0.195365	0.930778	0.734221	3.15008	1.25261
ENSMEUT00000013937	CACNB1		3.80805	3.81428	3.00665	2.0604	3.17234		5.38478	3.3713	2.38528	2.14577	3.32178
ENSMEUT00000005249	CACNB2		1.23407	1.53742	2.85999	3.4633	2.2737		2.16516	2.57826	5.17916	7.13013	4.26318
ENSMEUT00000009492	CACNB3		3.94573	6.63809	4.48201	6.14758	5.30335		7.45064	8.43448	6.52973	9.35928	7.94353
ENSMEUT00000014194	CACNG2		12.249	1.72876	7.64454	0.985975	5.65207		12.0625	0.481219	8.13963	0.671233	5.33865
ENSMEUT00000010682	CACNG3		0.0306908	0.114807	0	0.213941	0.0898597		0	0.0835894	0	0.110843	0.0486081
ENSMEUT00000008636	CACNG4		3.93061	5.89753	12.5505	15.5838	9.49061		3.50558	4.82242	10.4107	15.1659	8.47615
ENSMEUT00000008166	CACNG7		3.68328	3.19605	3.22378	0.857743	2.74021		6.06099	5.7075	2.12819	1.52479	3.85537
ENSMEUT00000008186	CACNG8		0.148158	0.736465	0.0813808	0.166576	0.283145		0.414543	0.489448	0.574748	0.582931	0.515417
ENSMEUT00000006678	CACTIN		16.9889	18.7188	31.9499	25.6555	23.3283		23.2996	19.0888	29.8188	29.5933	25.4501
ENSMEUT00000009488	CACUL1		17.1921	20.0777	206.17	204.384	111.956		20.6569	20.4276	226.301	198.519	116.476
ENSMEUT00000010753	CACYBP		314.257	349.805	343.246	432.958	360.067		251.763	329.387	303.716	393.897	319.691
ENSMEUT00000013911	CAD		14.9085	15.7588	36.8158	34.9773	25.6151		15.878	14.774	33.9295	40.0996	26.1703
ENSMEUT00000012910	CADM1		35.1587	155.725	210.157	568.232	242.318		39.6172	117.962	155.166	464.669	194.354
ENSMEUT00000013991	CADM2		0.234281	0.397393	2.22344	2.28983	1.28624		0.510447	0.42952	4.29987	4.74675	2.49665
ENSMEUT00000007038	CADM3		3.15667	9.42419	5.97185	7.01215	6.39121		8.50962	11.4514	9.27671	7.39006	9.15695
ENSMEUT00000007355	CADPS		0.0260845	0.0122175	0.373906	0	0.103052		0.0644663	0.00592585	0.236166	0.0240922	0.0826626
ENSMEUT00000010451	CADPS2		3.05037	3.92392	29.9033	29.7479	16.6564		3.56735	3.33295	26.078	25.3107	14.5723
ENSMEUT00000008754	CAGE1		3.44749	2.20111	17.437	13.0842	9.04245		2.65381	1.84204	16.3466	11.3593	8.05044
ENSMEUT00000007574	CALB1		0.0843337	0.0800458	3.35537	3.28428	1.70101		0.0420988	0.0390154	4.26737	2.96331	1.82795
ENSMEUT00000011048	CALB2		23.4655	120.95	23.4952	93.3416	65.3131		14.9608	78.5512	13.2521	64.8189	42.8957
ENSMEUT00000006236	CALCA		0.284725	0.35749	0	0.354136	0.249088		1.13843	0.174951	0.356672	0.732483	0.600634
ENSMEUT00000002126	CALCOCO1		25.046	13.0967	54.2622	19.6938	28.0247		36.8372	18.196	44.5298	21.8068	30.3425
ENSMEUT00000012194	CALCR		0	0	0	0	0		0.0390662	0.0178391	0	0.0693583	0.0315659
ENSMEUT00000008339	CALCRL		6.6302	6.12212	27.2905	20.1084	15.0378		11.0584	4.61084	44.6082	19.6127	19.9725
ENSMEUT00000005030	CALD1		8.0455	18.474	37.2555	55.4796	29.8136		18.4215	27.2821	66.9919	83.3591	49.0136
ENSMEUT00000016509	CALHM1		0.187997	0.276076	0.459271	0	0.230836		0.691489	0.317046	0.462347	0.663359	0.53356
ENSMEUT00000013799	CALHM2		0.976269	1.07018	3.21264	2.1801	1.8598		1.85775	1.69673	5.5961	3.3899	3.13512
ENSMEUT00000016519	CALHM3		0	0	0	0.0913759	0.022844		0	0	0	0	0
ENSMEUT00000002082	CALM3		711.13	1407.41	1060.39	2325.48	1376.1		805.77	1456.29	1185.12	1875.01	1330.55
ENSMEUT00000002819	CALML3		35.776	45.5813	49.9989	47.7621	44.7796		34.1753	43.3225	39.5952	48.5151	41.402
ENSMEUT00000011764	CALN1		0.0381286	0.178399	0	0	0.0541319		0.0378587	0.242303	0.132639	0.407929	0.205182
ENSMEUT00000014315	CALR		727.395	913.349	836.303	925.313	850.59		986.104	828.471	939.402	837.901	897.969
ENSMEUT00000014172	CALR3		0	0.0497876	0.104292	0	0.0385199		0.0261836	0.218121	0.105838	0.323199	0.168335
ENSMEUT00000007023	CALU		32.881	58.3326	128.152	153.812	93.2944		51.4806	55.9677	151.486	163.151	105.521
ENSMEUT00000005639	CAMK1		17.3504	30.2217	14.1358	24.2989	21.5017		20.7373	26.4644	14.4187	24.1766	21.4492
ENSMEUT00000009840	CAMK1D		8.49751	2.48038	318.689	107.724	109.348		4.71827	1.17911	316.171	118.889	110.239
ENSMEUT00000001503	CAMK1G		0	0.0524345	0	0	0.0131086		0.0368784	0.0507816	0.0654783	0.0668324	0.0549927
ENSMEUT00000004782	CAMK2A		0.0509914	0.254829	0.606586	0.664541	0.394237		0.151342	0.278293	0.30541	0.937315	0.41809
ENSMEUT00000014835	CAMK2B		0.203966	0.179286	0.305784	0.524761	0.303449		0.27745	0.104146	1.01021	0.988765	0.595143
ENSMEUT00000015943	CAMK2G		11.5311	12.0929	24.6337	19.0016	16.8148		14.9344	15.8713	26.8748	26.1854	20.9665
ENSMEUT00000006086	CAMK2N1		768.829	727.146	1016.89	653.087	791.488		1002.52	646.165	824.777	836.223	827.421
ENSMEUT00000004945	CAMK2N2		0.289073	2.15517	1.91307	3.77675	2.03352		0.286984	1.57258	0.979772	4.97926	1.95465
ENSMEUT00000016802	CAMK4		0.021252	0.0599673	0	0.233589	0.0787021		0	0.0582244	0.397488	0.406316	0.215507
ENSMEUT00000007058	CAMKK1		1.19918	1.59677	1.33041	2.26841	1.59869		2.03208	1.88473	1.95492	3.31034	2.29552
ENSMEUT00000002349	CAMKK2		1.27492	2.68237	2.90309	5.65418	3.12864		2.8443	3.85853	7.9772	9.2818	5.99046
ENSMEUT00000001542	CAMKMT		1.99079	1.94708	11.5276	9.72255	6.29701		2.14534	2.53692	10.683	12.2685	6.90844
ENSMEUT00000016811	CAMKV		0.472317	0.670912	0.46617	0.946982	0.639095		0.532876	1.15782	0.937217	0.638657	0.816642
ENSMEUT00000013716	CAMLG		25.6657	30.4897	46.8996	50.393	38.362		31.7076	34.6901	51.6611	45.3873	40.8615
ENSMEUT00000009628	CAMSAP2		2.75395	3.57799	40.3589	58.7304	26.3553		3.01158	2.86945	41.1798	58.3881	26.3622
ENSMEUT00000001451	CAMSAP3		37.2947	45.0683	38.2045	37.5731	39.5352		35.9824	40.8888	29.3465	41.9507	37.0421
ENSMEUT00000002208	CAMTA1		2.64374	2.0311	5.36503	3.37909	3.35474		2.79737	2.18573	5.08603	3.86448	3.4834
ENSMEUT00000008011	CAMTA2		19.4134	27.6298	23.8411	23.8836	23.692		22.9406	27.7201	18.3078	25.9575	23.7315
ENSMEUT00000007186	CAND1		12.3771	16.2617	55.0431	68.8104	38.1231		17.3699	17.5159	61.9999	63.3489	40.0587
ENSMEUT00000013155	CAND2		0.142243	0.16834	1.35548	1.14351	0.702393		0.207472	0.176362	0.652803	1.23027	0.566727
ENSMEUT00000000076	CANT1		9.96438	15.909	28.342	36.588	22.7008		13.34	12.7149	28.3652	32.6599	21.77
ENSMEUT00000003152	CANX		112.054	144.595	540.956	598.848	349.113		140.213	119.561	528.568	498.763	321.776
ENSMEUT00000004978	CAP1		49.1765	92.9887	101.694	152.215	99.0186		70.9507	96.6287	102.441	146.888	104.227
ENSMEUT00000003110	CAP2		7.71983	10.0075	22.2869	25.97	16.4961		11.839	19.677	24.9371	41.222	24.4188
ENSMEUT00000013603	CAPG		16.8348	19.4026	14.9728	11.6576	15.717		23.1647	21.5375	15.6028	15.3338	18.9097
ENSMEUT00000015752	CAPN1		43.6969	57.416	59.2343	69.7524	57.5249		48.8097	51.6469	55.3016	68.3334	56.0229
ENSMEUT00000011746	CAPN10		12.686	19.6261	26.3802	28.8841	21.8941		16.5525	18.9909	23.1211	33.5674	23.058
ENSMEUT00000005594	CAPN13		0.014141	0	0.312003	0.359065	0.171302		0	0	0.471755	0.374253	0.211502
ENSMEUT00000009587	CAPN14		0.185563	0.385066	0.32842	0.23348	0.283132		0.459187	0.277326	0.424686	0.482426	0.410906
ENSMEUT00000000030	CAPN15		4.30545	9.06289	9.0242	10.4388	8.20783		5.13801	8.7168	4.69948	11.5362	7.52262
ENSMEUT00000011952	CAPN2		29.6954	34.8069	92.0667	79.8045	59.0934		47.749	40.4801	108.405	89.952	71.6465
ENSMEUT00000001434	CAPN3		0.328758	0.338809	0.725958	0.796266	0.547448		0.389268	0.665524	0.692412	1.02003	0.691809
ENSMEUT00000000265	CAPN5		6.95073	6.9943	36.9948	23.0168	18.4892		13.2867	8.31959	40.663	28.4286	22.6745
ENSMEUT00000011611	CAPN6		0.879922	2.99959	2.08366	5.12166	2.77121		1.51554	3.04807	2.42511	4.75681	2.93638
ENSMEUT00000002166	CAPN7		10.5254	12.1318	24.0656	33.2553	19.9945		9.97408	11.0275	22.6079	29.2743	18.2209
ENSMEUT00000008668	CAPN8		1.34956	0.447186	1.67629	0.739764	1.0532		1.35037	0.253027	2.06069	0.574223	1.05958
ENSMEUT00000011289	CAPN9		1.08349	0.956288	2.08453	1.447	1.39283		0.78754	0.595482	1.91609	2.00039	1.32488
ENSMEUT00000012742	CAPRIN1		58.6146	69.0333	191.593	168.63	121.968		84.2918	76.91	188.218	186.263	133.921
ENSMEUT00000009215	CAPRIN2		0.978961	1.19705	3.12881	3.60758	2.2281		1.43647	1.80964	5.114	6.03114	3.59781
ENSMEUT00000011204	CAPS		156.968	245.46	82.3021	121.634	151.591		218.906	338.378	104.728	176.711	209.681
ENSMEUT00000006198	CAPS2		4.15259	4.11927	10.4267	13.1638	7.96559		4.48841	4.37697	13.4647	15.7499	9.52
ENSMEUT00000014226	CAPSL		18.4244	31.6758	55.8474	80.3532	46.5752		21.3072	34.2637	62.4077	99.3327	54.3278
ENSMEUT00000002023	CAPZB		98.3641	139.259	151.041	202.713	147.844		130.055	152.794	148.466	195.281	156.649
ENSMEUT00000016227	CARD10		8.63858	22.2467	19.6782	37.6939	22.0643		9.50374	22.7096	15.1756	44.9245	23.0784
ENSMEUT00000001408	CARD11		0.141118	0.0419609	0.326482	0.13402	0.160895		0.390003	0.101483	0.686049	0.419538	0.399268
ENSMEUT00000004334	CARD14		0.197731	0.105031	0.768564	0.273415	0.336185		0.213011	0.227196	1.23939	0.759303	0.609725
ENSMEUT00000013266	CARD6		2.893	1.54484	6.72847	4.76429	3.98265		3.0028	1.52656	8.12329	5.54181	4.54861
ENSMEUT00000000118	CARD9		0.285962	0.300193	0.607916	1.20456	0.599658		0.600617	0.381971	0.85918	1.00056	0.710582
ENSMEUT00000004953	CARF		1.04138	0.887765	13.2617	11.8558	6.76166		0.865647	0.468233	11.6716	13.6944	6.67497
ENSMEUT00000016443	CARHSP1		74.2138	95.7035	111.769	103.901	96.3968		99.0534	92.2919	101.504	95.2971	97.0366
ENSMEUT00000003431	CARM1		16.1019	25.538	30.7732	40.6227	28.2589		19.737	25.8594	29.1999	44.5365	29.8332
ENSMEUT00000001407	CARMIL1		7.84934	6.91195	29.5139	24.1254	17.1001		8.49533	5.64441	27.6879	21.9697	15.9493
ENSMEUT00000003313	CARMIL2		0.087697	0.00630096	0.0917725	0.0231411	0.0522279		0.220176	0.0182678	0.207411	0.0236266	0.11737
ENSMEUT00000008113	CARMIL3		0.716354	1.02851	0.446744	0.507952	0.67489		1.63673	1.77128	1.07246	1.17562	1.41402
ENSMEUT00000005985	CARNMT1		6.75189	10.4915	34.1989	37.139	22.1453		11.5817	12.5602	42.9457	44.3285	27.854
ENSMEUT00000002246	CARS		11.0785	29.4528	17.4848	43.189	25.3013		10.704	30.4028	14.029	39.1712	23.5768
ENSMEUT00000005596	CARS2		27.2414	19.6856	70.424	65.8101	45.7903		20.9908	20.7328	75.9186	67.2715	46.2284
ENSMEUT00000010482	CARTPT		0.26069	0	0.47559	0	0.18407		0.12921	0	0	0	0.0323025
ENSMEUT00000011945	CASC1		4.79344	8.37043	13.2564	28.0758	13.624		5.66807	9.95747	15.911	32.0832	15.9049
ENSMEUT00000015708	CASC3		22.2631	31.1431	41.5652	33.3856	32.0892		33.7716	33.7188	34.6544	42.9529	36.2744
ENSMEUT00000004809	CASC4		10.4148	14.0325	43.2628	45.3355	28.2614		15.7913	14.1053	51.9544	53.4474	33.8246
ENSMEUT00000015932	CASD1		33.6109	34.5015	59.3666	49.1204	44.1499		38.6077	32.8612	55.4126	53.7055	45.1467
ENSMEUT00000004657	CASK		52.317	42.7383	214.29	144.561	113.477		56.6486	35.5232	183.521	131.019	101.678
ENSMEUT00000011963	CASKIN1		0.264354	0.378008	0.241241	0.112809	0.249103		0.417168	0.512274	0.297125	0.381017	0.401896
ENSMEUT00000011917	CASKIN2		28.419	44.2624	42.5412	53.1457	42.0921		29.7328	43.6825	31.7731	57.5478	40.684
ENSMEUT00000013970	CASP1		9.48982	13.4141	12.351	15.9427	12.7994		17.5368	18.2314	21.9908	17.8459	18.9012
ENSMEUT00000010389	CASP12		3.9085	3.76366	4.67851	5.64601	4.49917		7.51181	5.76052	12.0148	8.27365	8.39019
ENSMEUT00000002129	CASP14		0	0.0849251	0	0.312893	0.0994545		0	0	0.318617	0	0.0796542
ENSMEUT00000011494	CASP2		10.6462	16.3995	48.5055	49.2401	31.1978		15.7309	15.4232	47.3801	64.6379	35.793
ENSMEUT00000011619	CASP6		5.03819	6.87209	18.0921	14.1717	11.0435		9.03479	7.49495	18.0229	18.6323	13.2962
ENSMEUT00000015567	CASP7		9.32653	8.98399	9.2694	13.4731	10.2633		9.52651	9.76653	7.73834	9.14135	9.04318
ENSMEUT00000007730	CASP8		1.09586	1.68231	1.62956	2.8883	1.82401		1.64758	2.02631	3.21242	3.2707	2.53925
ENSMEUT00000004910	CASP8AP2		3.23149	2.8649	35.026	32.2693	18.3479		3.19677	2.4175	31.3129	30.6543	16.8954
ENSMEUT00000000532	CASP9		4.03075	2.71166	6.75975	5.26341	4.69139		5.13054	3.49708	8.75385	8.12702	6.37712
ENSMEUT00000010614	CASQ1		0.142442	0.40041	2.47244	1.52702	1.13558		0.329475	0.345202	2.48756	1.66901	1.20781
ENSMEUT00000006967	CASQ2		0.083593	0.078614	0	0.409241	0.142862		0.0825613	0.101704	0.421246	0.537319	0.285708
ENSMEUT00000014618	CASR		0.781127	0.700674	2.49133	0.826398	1.19988		2.61486	0.801083	5.76464	1.96886	2.78736
ENSMEUT00000015835	CAST		18.8848	27.0238	60.4663	72.6214	44.7491		23.8305	24.3131	58.4441	58.1335	41.1803
ENSMEUT00000002410	CASTOR1		65.3016	76.7666	60.2292	56.633	64.7326		75.3687	63.529	57.4782	58.3793	63.6888
ENSMEUT00000003969	CASZ1		7.22843	5.0715	20.3912	8.83325	10.3811		8.60462	3.86511	14.6707	10.499	9.40986
ENSMEUT00000014658	CAT		102.232	102.611	241.433	236.888	170.791		135.744	113.471	207.46	211.909	167.146
ENSMEUT00000002471	CATSPER4		0.0512567	0	0.361431	0.18077	0.148364		0.127277	0.0232637	0	0	0.0376352
ENSMEUT00000005430	CATSPERB		0.104633	0.0269508	0.551336	0.578274	0.315298		0.047298	0.0699952	0.334824	0.341885	0.198501
ENSMEUT00000011756	CATSPERG		0.00996027	0	0.070667	0	0.0201568		0	0.0180839	0	0.0363446	0.0136071
ENSMEUT00000008275	CAV3		0.237418	0.944082	0.820854	0.203522	0.551469		0.234196	0.538057	0.621942	1.05873	0.613231
ENSMEUT00000010487	CAVIN1		137.462	275.409	465.987	507.296	346.538		227.366	318.594	443.615	578.594	392.042
ENSMEUT00000006103	CAVIN3		67.2188	95.5328	22.2558	18.3999	50.8518		114.416	124.414	22.8234	29.1705	72.706
ENSMEUT00000010934	CBFA2T2		3.79943	3.15099	12.3965	6.33664	6.42089		7.60983	3.85903	15.6147	8.96431	9.01197
ENSMEUT00000014003	CBFB		129.252	106.628	216.694	186.762	159.834		119.294	96.5673	192.514	225.649	158.506
ENSMEUT00000008330	CBL		1.95044	2.21465	47.3252	38.3255	22.4539		2.03341	2.17286	36.5025	40.7705	20.3698
ENSMEUT00000006747	CBLB		2.50552	2.02811	29.6236	22.5677	14.1812		2.86106	1.84814	31.4857	26.4141	15.6523
ENSMEUT00000015382	CBLN1		5.34367	5.41999	2.74671	4.76722	4.5694		2.49318	3.65373	2.40711	3.26942	2.95586
ENSMEUT00000001646	CBLN3		2.2587	2.75376	1.60465	0.967441	1.89614		3.95073	3.69116	2.59574	1.99415	3.05794
ENSMEUT00000002994	CBR4		8.66587	8.84034	19.6317	23.0816	15.0549		9.62351	9.09562	21.6182	21.6503	15.4969
ENSMEUT00000009278	CBX2		2.50098	2.71411	14.6182	13.0576	8.22272		4.53619	2.39017	18.1419	13.1024	9.54266
ENSMEUT00000008241	CBX5		13.9703	16.0045	201.492	163.514	98.7452		14.2863	12.379	200.061	179.673	101.6
ENSMEUT00000007407	CBX6		4.02249	4.448	8.87449	5.85326	5.79956		7.94999	4.59577	8.23343	9.02534	7.45113
ENSMEUT00000013247	CBX7		4.07682	3.21141	15.3977	5.67761	7.09089		7.57662	4.57504	12.2103	10.3056	8.66689
ENSMEUT00000006828	CC2D1A		52.8464	46.47	65.868	41.1719	51.5891		57.5525	45.6721	53.4168	52.2	52.2104
ENSMEUT00000003847	CC2D1B		49.8683	48.4394	48.5446	39.8477	46.675		48.6669	47.2318	41.4389	49.4121	46.6874
ENSMEUT00000016589	CC2D2A		2.61826	2.33641	11.3246	12.2575	7.13419		3.26622	3.12446	17.0065	14.3606	9.43944
ENSMEUT00000003751	CC2D2B		5.22149	1.94221	21.2525	14.0152	10.6079		3.22497	2.94206	28.3298	18.7824	13.3198
ENSMEUT00000012119	CCAR1		16.3406	17.2388	55.6215	60.8503	37.5128		14.7747	15.4313	49.3814	60.5131	35.0251
ENSMEUT00000002177	CCAR2		26.0179	30.7355	35.3748	34.5044	31.6581		30.5816	33.2136	31.7989	37.9256	33.3799
ENSMEUT00000003900	CCBE1		0.680626	0.637791	17.7979	6.76431	6.47016		1.8516	0.276342	20.7111	9.06116	7.97505
ENSMEUT00000009900	CCDC102B		0.144635	0.153895	1.7309	2.16991	1.04983		0.179475	0.116263	4.57931	4.15971	2.25869
ENSMEUT00000015469	CCDC105		0	0.0224436	0	0.0843993	0.0267107		0.0948906	0.043507	0.171599	0.0875454	0.0993855
ENSMEUT00000003390	CCDC106		23.211	25.8109	20.3148	17.1342	21.6177		26.6766	27.898	16.4982	24.5183	23.8978
ENSMEUT00000009295	CCDC107		16.7118	19.0796	12.047	10.3075	14.5365		18.031	17.6309	12.4754	13.8988	15.509
ENSMEUT00000009241	CCDC110		0.620434	0.949696	11.3152	13.9966	6.72048		0.692395	0.980411	15.0276	15.2512	7.9879
ENSMEUT00000000349	CCDC112		5.81773	5.39964	15.4484	15.096	10.4404		5.17866	5.15559	19.1801	16.0797	11.3985
ENSMEUT00000009148	CCDC113		22.5033	15.2561	16.6327	15.0494	17.3604		19.7488	19.0602	19.302	17.8924	19.0008
ENSMEUT00000001791	CCDC117		13.7152	18.3581	46.2357	40.3715	29.6701		20.4837	15.6656	50.0962	42.646	32.2229
ENSMEUT00000002107	CCDC120		33.1636	33.3586	14.1022	9.65928	22.5709		29.7772	30.5488	9.98827	12.1012	20.6039
ENSMEUT00000011434	CCDC122		1.12075	1.06107	2.89375	2.53857	1.90353		1.16934	0.69497	2.07468	3.47409	1.85327
ENSMEUT00000009261	CCDC124		35.0672	42.8221	69.9131	64.9888	53.1978		53.0831	46.5393	62.4158	80.7504	60.6971
ENSMEUT00000014597	CCDC125		1.40847	1.29553	9.03404	8.20696	4.98625		1.47864	0.797084	7.96256	6.85747	4.27394
ENSMEUT00000000448	CCDC126		3.75508	5.93017	10.6492	10.9926	7.83176		5.43206	6.02086	10.1591	12.8966	8.62716
ENSMEUT00000001995	CCDC127		21.2705	31.0168	86.4701	118.756	64.3784		27.9901	31.4616	70.5876	86.5403	54.1449
ENSMEUT00000009748	CCDC13		0.816902	2.09702	5.45191	12.0508	5.10416		0.882695	1.83513	5.7813	16.7387	6.30946
ENSMEUT00000013735	CCDC130		59.82	57.7482	29.2695	32.492	44.8324		47.5485	49.2387	27.0733	29.8758	38.4341
ENSMEUT00000004669	CCDC134		47.9724	69.1685	50.352	60.6881	57.0452		52.1429	63.1982	36.6217	60.7294	53.173
ENSMEUT00000016543	CCDC136		0.810608	0.775587	1.09052	0.797554	0.868567		1.56392	1.87778	2.66546	3.34989	2.36426
ENSMEUT00000015656	CCDC137		19.4933	27.8954	32.2333	39.3326	29.7386		22.7496	27.5027	30.0689	35.8196	29.0352
ENSMEUT00000001576	CCDC138		12.2127	12.6733	38.291	46.74	27.4793		12.0751	13.4179	42.4908	46.0314	28.5038
ENSMEUT00000009643	CCDC14		26.7146	18.3017	23.1504	18.6982	21.7162		22.4971	19.2728	21.2788	21.2438	21.0731
ENSMEUT00000008959	CCDC142		27.8909	20.0935	30.6686	19.8873	24.6351		29.3362	22.1893	26.8127	26.7577	26.274
ENSMEUT00000002272	CCDC146		5.4734	7.01245	13.3818	17.6639	10.8829		5.47722	8.02926	13.7918	22.6356	12.4835
ENSMEUT00000007546	CCDC148		0.566741	0.887617	2.45693	3.78948	1.92519		0.480013	1.18774	1.60868	4.65302	1.98236
ENSMEUT00000009637	CCDC149		2.17801	3.61487	20.7148	24.1721	12.6699		2.57924	2.22842	19.536	22.9827	11.8316
ENSMEUT00000002059	CCDC150		1.0291	0.436504	2.12251	0.932895	1.13025		0.872747	0.56884	2.53564	1.30867	1.32147
ENSMEUT00000016737	CCDC151		9.50193	17.6856	26.6344	47.5476	25.3424		13.8559	22.1408	26.6364	77.4213	35.0136
ENSMEUT00000000309	CCDC152		2.26583	0.784709	6.69149	4.53648	3.56963		1.82213	1.0494	8.48371	6.53137	4.47165
ENSMEUT00000007917	CCDC154		0.160858	0.137736	1.0123	1.79129	0.775546		0.159402	0.106923	0.862052	1.81545	0.735957
ENSMEUT00000015707	CCDC157		5.30245	7.13669	4.90312	4.15969	5.37549		4.99696	9.14308	3.55794	6.0124	5.92759
ENSMEUT00000002352	CCDC158		5.37361	6.25727	8.05783	8.77629	7.11625		4.62224	6.25367	6.59559	10.2041	6.9189
ENSMEUT00000009025	CCDC167		97.0367	65.5186	63.6902	36.2149	65.6151		90.415	59.1879	66.7547	40.9243	64.3205
ENSMEUT00000008860	CCDC170		4.6964	3.8742	48.184	21.0138	19.4421		6.4417	3.9144	47.8903	27.0801	21.3316
ENSMEUT00000015807	CCDC171		6.38517	4.20936	35.7628	27.9524	18.5774		5.90575	4.25809	37.3857	28.7254	19.0687
ENSMEUT00000001990	CCDC172		0	0	1.18269	1.6909	0.718398		0	0	3.0145	1.84801	1.21563
ENSMEUT00000013320	CCDC173		2.19198	4.26695	7.74359	12.6862	6.72218		2.21612	5.5372	8.24977	15.478	7.87027
ENSMEUT00000008458	CCDC174		14.1572	14.2016	20.7565	26.5549	18.9175		13.5964	15.8379	25.6906	28.4129	20.8845
ENSMEUT00000010094	CCDC18		0.641924	0.417303	1.39351	1.78749	1.06006		0.506238	0.446544	1.94138	2.05894	1.23828
ENSMEUT00000011939	CCDC180		4.15096	5.34871	9.54165	15.6237	8.66625		3.61344	7.04907	9.80176	21.4801	10.4861
ENSMEUT00000004525	CCDC181		16.9251	14.8001	30.6619	22.2618	21.1622		17.5954	16.2909	25.2666	26.8367	21.4974
ENSMEUT00000004636	CCDC182		0.0941756	0.17671	0	0	0.0677214		0.186361	0	0	0	0.0465902
ENSMEUT00000005832	CCDC184		0.606366	1.31822	0.476105	0	0.600173		2.10499	1.76934	0.648905	0.331012	1.21356
ENSMEUT00000011479	CCDC185		0.0127919	0.0359227	0.0450077	0.0452859	0.034752		0.0380105	0.0579297	0	0.184873	0.0702033
ENSMEUT00000003838	CCDC186		0.372999	0.312764	27.4015	28.7697	14.2142		0.458864	0.183594	27.6567	27.8944	14.0484
ENSMEUT00000004804	CCDC189		6.76804	8.74375	14.4408	11.0198	10.2431		7.92899	8.28841	11.1867	11.9787	9.8457
ENSMEUT00000006139	CCDC191		8.21275	7.90959	21.3376	24.2642	15.431		7.9417	8.90905	23.1146	27.8871	16.9631
ENSMEUT00000008948	CCDC22		43.7357	33.5295	24.2609	18.7784	30.0761		37.6226	36.3551	18.9563	21.3602	28.5735
ENSMEUT00000006377	CCDC25		19.2413	27.2012	87.6268	117.709	62.9446		22.2523	24.6102	90.7672	99.5507	59.2951
ENSMEUT00000006152	CCDC28A		14.446	5.99475	25.9054	11.6087	14.4887		14.4102	6.27549	24.9572	11.1188	14.1904
ENSMEUT00000005227	CCDC28B		20.0501	26.8023	21.5566	20.3955	22.2011		31.6365	33.7641	23.1757	28.7364	29.3282
ENSMEUT00000003544	CCDC3		25.1989	8.92737	110.374	28.2907	43.1977		48.5288	7.92983	123.447	46.0521	56.4894
ENSMEUT00000001687	CCDC30		3.64924	3.96884	5.24141	6.06628	4.73144		3.54449	4.52181	5.067	7.78698	5.23007
ENSMEUT00000009897	CCDC33		9.80635	14.4291	9.48779	16.803	12.6316		10.7133	18.6149	12.0515	22.8287	16.0521
ENSMEUT00000008387	CCDC38		0	0	0	0.162474	0.0406185		0	0	0.168094	0.171577	0.0849178
ENSMEUT00000011317	CCDC40		5.36547	10.6575	19.119	35.8989	17.7602		6.90356	12.5286	23.5194	48.6184	22.8925
ENSMEUT00000013102	CCDC42		4.35816	3.20323	5.28373	5.61484	4.61499		3.12278	3.43358	3.77083	3.19786	3.38126
ENSMEUT00000005567	CCDC43		42.2905	47.4877	89.3284	75.0241	63.5327		45.413	46.0087	77.6405	77.9544	61.7541
ENSMEUT00000001201	CCDC47		17.8121	26.7402	39.6167	64.627	37.199		17.0517	24.3604	39.3698	60.8842	35.4165
ENSMEUT00000008474	CCDC50		1.38669	1.92745	20.1035	20.8525	11.0675		1.43915	1.2386	22.4577	25.4263	12.6404
ENSMEUT00000010510	CCDC51		5.0964	8.29506	13.3709	17.5484	11.0777		7.52324	8.28827	16.23	18.2968	12.5846
ENSMEUT00000012307	CCDC54		0.0342806	0	0	0	0.00857015		0	0.0317025	0.27315	0.138824	0.110919
ENSMEUT00000012640	CCDC57		2.96226	3.0838	29.0964	28.5324	15.9187		3.96415	2.9958	35.1115	34.2984	19.0925
ENSMEUT00000012205	CCDC58		38.5055	39.3787	47.0077	55.6802	45.143		36.0591	36.7932	46.3944	50.9681	42.5537
ENSMEUT00000000630	CCDC59		33.8488	35.918	59.1811	50.152	44.775		38.7511	42.5303	74.1079	62.5704	54.4899
ENSMEUT00000003785	CCDC6		10.0889	13.5099	54.3691	42.6244	30.1481		14.3951	13.7296	43.4537	46.6157	29.5485
ENSMEUT00000015625	CCDC60		0.73951	2.33098	1.71512	3.32345	2.02726		0.732196	2.71157	2.15456	5.16461	2.69073
ENSMEUT00000003902	CCDC61		47.9338	33.7563	21.3579	15.7942	29.7106		42.746	36.4189	20.417	20.6817	30.0659
ENSMEUT00000006068	CCDC62		1.0811	0.382338	2.41487	0.563469	1.11044		0.900692	0.401391	2.44053	0.532945	1.06889
ENSMEUT00000008906	CCDC63		0.0633044	0.059689	0	0	0.0307484		0.0626394	0.0385251	0	0.0796572	0.0452054
ENSMEUT00000005051	CCDC65		8.36657	16.4386	10.6471	20.3029	13.9388		9.1947	21.3582	10.4187	27.7342	17.1765
ENSMEUT00000010558	CCDC66		19.7176	16.7038	40.1074	32.9867	27.3789		17.3332	17.0768	34.3258	37.2992	26.5087
ENSMEUT00000007237	CCDC68		6.49238	2.5882	18.7752	5.498	8.33845		10.2411	3.46835	26.5222	5.34028	11.393
ENSMEUT00000000796	CCDC73		0.21817	0.126453	1.32068	1.6563	0.830401		0.169137	0.246679	1.73594	1.36551	0.879317
ENSMEUT00000001116	CCDC77		15.4821	9.53143	24.1481	17.3221	16.6209		14.2349	8.28825	23.2271	17.1748	15.7313
ENSMEUT00000002367	CCDC80		3.81673	24.6767	8.03439	36.0778	18.1514		8.14012	29.7007	17.1786	44.6343	24.9134
ENSMEUT00000016400	CCDC81		6.6932	12.6928	15.2905	28.1628	15.7098		9.39604	16.4429	19.5939	35.6005	20.2583
ENSMEUT00000004461	CCDC83		0	0	0	0.223948	0.055987		0	0.0274129	0	0.359346	0.0966897
ENSMEUT00000014206	CCDC84		32.3476	23.8525	29.4579	25.036	27.6735		29.8167	26.9676	31.2646	28.4209	29.1175
ENSMEUT00000005221	CCDC85A		0.203475	0.28629	1.55767	1.16307	0.802626		0.822778	0.277088	3.84504	1.55229	1.6243
ENSMEUT00000001304	CCDC85C		1.01293	0.946778	10.2685	6.68784	4.72901		1.43329	0.65507	10.443	9.51238	5.51093
ENSMEUT00000000987	CCDC87		0.725671	0.877444	0.621432	1.31897	0.885879		0.947821	1.07036	1.21278	2.09188	1.33071
ENSMEUT00000009015	CCDC88A		0.123412	0.331044	5.9839	7.83682	3.56879		0.395311	0.386906	12.2189	12.1791	6.29505
ENSMEUT00000003476	CCDC88C		11.2668	14.9564	71.4468	67.991	41.4153		14.3294	11.6214	63.5903	73.5405	40.7704
ENSMEUT00000009399	CCDC89		0.48786	0.676503	1.60683	1.00317	0.943591		0.943714	1.25085	1.28656	1.65486	1.284
ENSMEUT00000010110	CCDC9		67.8721	49.3052	35.8722	22.9255	43.9937		68.4582	57.4747	32.4463	31.2061	47.3963
ENSMEUT00000011033	CCDC90B		41.2943	41.6745	59.9788	79.3146	55.5656		41.3391	43.7212	72.8349	75.2599	58.2888
ENSMEUT00000010693	CCDC91		9.47353	9.63929	48.3556	44.6611	28.0324		11.5722	10.4097	46.4353	41.4581	27.4688
ENSMEUT00000016464	CCDC92		5.47012	16.3982	2.47144	6.68067	7.75511		5.60542	11.0297	1.99404	5.454	6.02079
ENSMEUT00000004070	CCDC93		6.44706	7.64637	20.6235	20.1981	13.7288		8.44531	8.14394	24.7716	23.9432	16.326
ENSMEUT00000001177	CCDC97		22.4499	22.071	9.31555	9.10128	15.7344		22.7003	23.1841	10.5992	11.5269	17.0026
ENSMEUT00000014467	CCER1		0.0226414	0.0925895	0.0734083	0.0683448	0.064246		0.067288	0.0557291	0.149016	0.364753	0.159197
ENSMEUT00000013239	CCHCR1		8.43636	5.04228	6.85222	4.02087	6.08793		9.93108	6.19001	7.33282	5.26956	7.18087
ENSMEUT00000007203	CCK		0.135499	0	0	0	0.0338748		0	0	0	0.467814	0.116954
ENSMEUT00000004026	CCKAR		0	0.0203497	0.0789714	0.077778	0.0442748		0	0	0	0	0
ENSMEUT00000006096	CCKBR		0.909719	1.2018	2.4223	2.91493	1.86219		0.53774	0.550952	1.51848	1.79019	1.09934
ENSMEUT00000014847	CCL19		4.63114	4.08381	1.72893	0.853049	2.82423		15.3396	8.42671	5.30508	3.5807	8.16302
ENSMEUT00000006341	CCL26		0.900486	1.89333	1.53316	1.51328	1.46006		2.46442	7.39374	2.35123	3.96329	4.04317
ENSMEUT00000013038	CCL28		0	0	0	0.548425	0.137106		0	0	0	0	0
ENSMEUT00000014208	CCM2		7.88391	9.23523	27.7328	21.9426	16.6986		9.67267	8.94893	23.7871	24.2156	16.6561
ENSMEUT00000000640	CCM2L		2.37193	3.16113	1.34781	1.57247	2.11334		3.19322	4.33904	2.91196	2.34199	3.19655
ENSMEUT00000001256	CCNA1		2.96688	3.94758	4.55497	6.17628	4.41143		3.67144	4.81917	4.71839	7.48945	5.17461
ENSMEUT00000008929	CCNA2		0	0	0.391409	0.0971452	0.122139		0.0532276	0.0244863	0.393992	0.202034	0.168435
ENSMEUT00000006431	CCNB1		5.17588	4.27081	17.9593	14.0647	10.3677		6.32703	4.85989	16.3324	15.0087	10.632
ENSMEUT00000016329	CCNB2		9.64007	7.65809	44.5599	33.6299	23.872		8.80214	6.06246	41.1576	25.634	20.414
ENSMEUT00000007981	CCNC		24.0019	23.6615	51.2598	51.8399	37.6908		23.239	22.896	53.891	48.7771	37.2008
ENSMEUT00000002222	CCND1		18.9774	52.7509	45.3248	78.0877	48.7852		39.5981	67.8808	55.7849	123.062	71.5815
ENSMEUT00000003526	CCND2		1.52506	4.12821	8.44921	11.6551	6.43939		3.45441	3.60982	13.2833	16.9341	9.32041
ENSMEUT00000000763	CCND3		27.7767	18.7465	19.9986	12.6632	19.7963		29.9548	20.146	22.8489	15.4475	22.0993
ENSMEUT00000006818	CCNE1		0.404358	0.705376	0.232434	1.70467	0.76171		0.432159	0.740207	0.819707	0.836342	0.707104
ENSMEUT00000000508	CCNE2		2.14095	2.1907	9.70265	9.42714	5.86536		2.07033	2.87207	11.2546	11.052	6.81225
ENSMEUT00000016386	CCNF		0.0391839	0.356764	0.24178	0.662648	0.325094		0.155502	0.369298	0.634943	0.598384	0.439532
ENSMEUT00000008724	CCNG2		19.8026	18.264	54.7319	38.079	32.7194		22.783	15.4606	47.4447	31.3071	29.2488
ENSMEUT00000013837	CCNH		15.8256	19.364	24.9373	32.3409	23.1169		18.1692	19.3653	28.632	31.4878	24.4136
ENSMEUT00000014011	CCNI		162.143	229.085	251.669	252.244	223.785		170.277	201.042	198.677	243.797	203.448
ENSMEUT00000014792	CCNJL		0.333058	0.584043	0.35783	0.781956	0.514222		0.883879	0.827829	0.648351	0.954963	0.828755
ENSMEUT00000010984	CCNL1		109.325	98.4062	133.192	127.374	117.074		88.7731	95.4389	107.278	127.055	104.636
ENSMEUT00000002353	CCNL2		25.3614	30.4099	197.345	210.467	115.896		27.0548	24.7364	177.346	212.732	110.467
ENSMEUT00000002360	CCNL2		297.542	271.118	270.484	274.61	278.438		233.103	262.534	231.215	288.352	253.801
ENSMEUT00000002869	CCNO		0.205253	0.0956652	0.179983	0	0.120225		0.152513	0.281217	0.0908119	0.0924814	0.154256
ENSMEUT00000015356	CCNT2		12.6693	12.1239	67.0933	64.4788	39.0913		12.5153	9.09635	66.3938	64.5178	38.1308
ENSMEUT00000010267	CCNY		5.22756	5.51789	15.44	10.9449	9.28259		7.83528	5.97125	18.5419	14.637	11.7464
ENSMEUT00000002518	CCNYL1		19.1157	20.6705	41.0001	49.3908	32.5443		22.0613	19.1718	53.1561	45.083	34.868
ENSMEUT00000012916	CCP110		4.98442	6.21728	66.1745	64.3422	35.4296		6.92176	5.20787	66.3896	65.8492	36.0921
ENSMEUT00000014603	CCPG1		4.85768	5.51486	59.0175	66.179	33.8923		6.71742	5.26094	62.293	56.2673	32.6347
ENSMEUT00000015886	CCR10		0.274982	0.30365	0.738088	0.165517	0.370559		0.247134	0.383388	0.988902	1.18	0.699856
ENSMEUT00000013461	CCR3		0.0860915	0.0540993	0.950984	0.205754	0.324232		0	0.0263249	1.06363	0.759999	0.462488
ENSMEUT00000009969	CCR4		0.631471	0.918167	8.60854	12.3507	5.62722		0.313474	0.366077	2.85889	10.1668	3.42631
ENSMEUT00000015024	CCR7		0	0	0.274132	0.181394	0.113881		0.0256492	0.0469683	0.275254	0.0939157	0.110447
ENSMEUT00000014566	CCR9		0.0596402	0.11165	3.21972	1.79468	1.29642		0.0589656	0	1.82919	1.10336	0.747879
ENSMEUT00000000995	CCS		79.0732	51.1468	56.2222	34.9414	55.3459		80.0033	60.1683	53.5209	43.676	59.3421
ENSMEUT00000008047	CCSER2		5.03327	4.27378	88.7656	61.2188	39.8229		5.79606	3.19085	85.0231	63.6894	39.4249
ENSMEUT00000000548	CCT2		71.5168	91.3272	138.476	183.045	121.091		82.5885	100.231	140.729	158.832	120.595
ENSMEUT00000008893	CCT3		89.9719	124.511	110.055	157.836	120.593		97.7165	134.551	113.408	160.652	126.582
ENSMEUT00000013528	CCT4		40.3124	50.854	69.3048	96.1509	64.1555		45.7928	58.108	73.1157	82.1445	64.7903
ENSMEUT00000012779	CCT5		31.8437	41.3676	55.3582	79.7963	52.0915		37.7664	46.5777	63.4131	70.7714	54.6322
ENSMEUT00000003537	CCT6A		78.592	123.266	155.893	218.438	144.047		97.1579	136.532	160.426	223.052	154.292
ENSMEUT00000000415	CCT7		155.922	176.885	151.695	164.734	162.309		163.442	189.548	146.4	163.189	165.645
ENSMEUT00000016696	CCT8		77.6144	80.8627	120.991	136.912	104.095		87.5277	93.0654	123.803	135.987	110.096
ENSMEUT00000010298	CCT8L2		0.145502	0.136151	0.0553764	0.220671	0.139425		0.143918	0.0438996	0.0555722	0.056665	0.0750137
ENSMEUT00000009614	CD101		0.534773	0.632419	2.70405	2.19757	1.5172		0.64067	0.377006	2.87944	2.87599	1.69328
ENSMEUT00000000806	CD109		0.727094	0.432716	31.6258	30.7376	15.8808		0.556716	0.248147	45.114	31.3295	19.3121
ENSMEUT00000003949	CD151		174.863	209.022	124.235	111.943	155.016		227.977	248.863	128.643	132.3	184.446
ENSMEUT00000000040	CD160		2.65257	0.622796	2.46511	1.81963	1.89003		3.29209	0.530706	4.10493	1.28143	2.30229
ENSMEUT00000004480	CD164L2		77.881	99.4692	26.7943	33.5928	59.4343		83.8584	134.426	34.9754	53.9033	76.7908
ENSMEUT00000016258	CD180		0.0593317	0.11193	0.330627	0.648069	0.287489		0.103029	0.0271043	1.21997	0.793377	0.53587
ENSMEUT00000003223	CD200		8.40336	7.65013	15.8148	16.3179	12.0465		13.8092	14.7894	24.7146	24.0985	19.3529
ENSMEUT00000005372	CD207		0	0	0	0	0		0.0389814	0	0.143661	0	0.0456606
ENSMEUT00000009946	CD22		0.143167	0.249284	0.287301	0.285173	0.241231		0.455526	0.28785	0.216642	0.221881	0.295475
ENSMEUT00000005017	CD248		12.6099	29.3359	11.3432	9.25451	15.6359		34.6314	44.6051	15.3639	16.0322	27.6582
ENSMEUT00000015282	CD27		1.03781	0.785398	6.54859	4.29315	3.16624		1.22395	0.809015	7.4445	7.79938	4.31921
ENSMEUT00000007007	CD274		0.0514407	0.194475	0.597389	0.972609	0.453978		0.102143	0.0947214	1.21483	0.825991	0.559421
ENSMEUT00000005615	CD28		0.0715646	0	0.265375	0	0.0842349		0.0707163	0	1.07428	0.272377	0.354343
ENSMEUT00000011240	CD2AP		9.40814	8.75838	71.3669	65.753	38.8216		11.1072	6.96558	77.2435	63.026	39.5856
ENSMEUT00000013671	CD2BP2		113.351	109.103	129.024	101.513	113.248		125.895	111.721	120.011	109.817	116.861
ENSMEUT00000013202	CD302		2.42782	7.10734	11.1071	13.1714	8.45341		6.77556	8.16641	19.6471	17.5216	13.0277
ENSMEUT00000011373	CD36		0.276353	0.520054	0.721348	1.72112	0.809719		2.43041	0.409338	3.97371	2.90073	2.42855
ENSMEUT00000012608	CD37		8.88969	8.56446	4.99502	2.9417	6.34772		13.7631	12.0042	6.47323	3.85856	9.02477
ENSMEUT00000015121	CD38		1.28294	0.285543	7.81391	1.74391	2.78158		2.7161	1.05679	17.789	1.57058	5.78312
ENSMEUT00000003940	CD3D		10.1727	6.73737	8.56067	6.43438	7.97628		9.04709	7.24125	12.1096	6.7953	8.79831
ENSMEUT00000000308	CD3EAP		18.1956	20.3638	17.7633	15.5639	17.9717		15.7988	20.9723	15.2108	22.6384	18.6551
ENSMEUT00000008513	CD3G		1.05556	0.249266	3.24568	0.980716	1.38281		2.95145	0.182261	5.56583	1.29283	2.49809
ENSMEUT00000015665	CD40LG		0	0.0387814	0	0	0.00969535		0	0	0	0.15342	0.038355
ENSMEUT00000007296	CD44		1.18193	3.05264	9.44377	13.1652	6.71089		3.27253	3.8445	17.266	19.9562	11.0848
ENSMEUT00000013142	CD47		21.9632	26.0634	241.57	196.602	121.55		37.168	17.8543	269.308	186.145	127.619
ENSMEUT00000006277	CD53		1.22511	1.53325	1.43297	2.85567	1.76175		2.69378	2.00744	4.00584	2.04967	2.68918
ENSMEUT00000005297	CD5L		1.14379	3.04341	2.5519	5.09505	2.95854		5.15074	4.99803	4.20346	5.23585	4.89702
ENSMEUT00000001590	CD63		468.852	370.363	255.412	219.1	328.432		521.515	404.23	293.619	213	358.091
ENSMEUT00000010827	CD68		1.26529	2.92382	1.72173	4.61629	2.63178		1.54684	3.0809	1.93565	5.1773	2.93517
ENSMEUT00000009256	CD69		0.0770021	0	0.281191	0	0.0895483		0	0	0.573051	0	0.143263
ENSMEUT00000012564	CD72		0.114779	0.026971	0	0.205136	0.0867215		0.0568982	0.0261745	0	0.212895	0.0739919
ENSMEUT00000014960	CD74		574.73	175.836	693.272	211.647	413.871		986.182	224.966	1057.55	258.504	631.801
ENSMEUT00000012641	CD79B		0	0.619743	0.158695	1.1197	0.474534		0.187481	0.68843	0	0.49176	0.341918
ENSMEUT00000000523	CD81		209.946	262.886	194.365	150.887	204.521		378.279	365.261	241.663	214.367	299.892
ENSMEUT00000013905	CD82		13.3842	11.1176	13.7014	12.7715	12.7437		19.9051	15.1393	22.3004	19.0175	19.0906
ENSMEUT00000014828	CD8B		0.796392	0.0677776	0	0	0.216042		1.21947	0.330024	1.80908	0	0.839643
ENSMEUT00000016118	CDA		35.5737	75.9434	42.814	120.3	68.6578		28.0316	66.7974	47.6642	80.9949	55.872
ENSMEUT00000008428	CDAN1		8.96718	8.0918	8.80461	7.66451	8.38202		9.56283	10.2426	10.1667	10.2078	10.045
ENSMEUT00000016478	CDC123		31.6378	28.9947	76.4759	75.122	53.0576		31.455	31.2684	83.2082	70.8923	54.206
ENSMEUT00000008176	CDC14A		4.57202	6.43309	34.6813	34.356	20.0106		6.69815	6.00214	42.4959	46.3184	25.3786
ENSMEUT00000001985	CDC14B		1.13582	1.11893	44.6394	40.3837	21.8195		1.6202	0.773412	61.7006	54.113	29.5518
ENSMEUT00000014502	CDC16		8.21366	9.23005	31.6276	32.8053	20.4692		8.49907	8.78413	28.1944	33.6701	19.7869
ENSMEUT00000013582	CDC20		4.15415	4.02786	4.51875	3.9998	4.17514		5.15583	4.45965	4.96727	5.06991	4.91317
ENSMEUT00000000918	CDC20B		0.22997	4.89045	0.540844	11.1333	4.19864		0.227295	2.72782	0.748739	5.7166	2.35511
ENSMEUT00000001924	CDC23		14.5601	12.4696	21.3911	18.8351	16.814		15.9779	13.3771	22.5074	18.6383	17.6252
ENSMEUT00000000162	CDC25A		0.329167	0.43344	1.21268	0.638542	0.653457		0.783071	0.401229	0.894523	1.3321	0.852731
ENSMEUT00000002335	CDC25B		2.28457	2.47269	4.06794	3.54109	3.09157		5.58201	5.34133	7.02611	5.87876	5.95705
ENSMEUT00000009769	CDC26		291.396	360.182	192.215	257.313	275.276		275.873	350.167	233.667	201.35	265.264
ENSMEUT00000008493	CDC27		2.55588	3.58076	29.4295	37.748	18.3285		3.41954	2.76892	30.4959	38.2887	18.7433
ENSMEUT00000000809	CDC34		65.7326	84.6178	106.913	91.0912	87.0887		87.2695	79.9731	95.6288	89.6534	88.1312
ENSMEUT00000002288	CDC37		170.641	174.146	176.655	168.655	172.524		205.724	187.129	194.161	176.768	190.945
ENSMEUT00000001790	CDC37L1		18.3008	25.1563	50.1074	57.8256	37.8475		23.7353	24.5515	49.6238	60.5671	39.6194
ENSMEUT00000014188	CDC40		8.06037	9.08119	31.5665	32.207	20.2288		9.45634	9.16525	37.3781	35.1333	22.7832
ENSMEUT00000005311	CDC42		103.562	139.371	320.434	352.745	229.028		142.016	150.13	348.572	342.178	245.724
ENSMEUT00000008337	CDC42BPA		1.59456	1.15803	58.7345	58.8662	30.0883		1.28629	0.884497	70.9543	65.0402	34.5413
ENSMEUT00000001811	CDC42BPG		19.665	19.1286	21.7282	15.502	19.0059		19.2299	15.213	15.3036	18.0707	16.9543
ENSMEUT00000005433	CDC42EP2		45.1582	62.973	27.0662	37.7703	43.2419		55.7051	71.6856	33.3025	42.6159	50.8273
ENSMEUT00000006379	CDC42EP3		5.81098	5.88855	8.93993	9.97154	7.65275		8.11834	8.35622	19.4015	14.9391	12.7038
ENSMEUT00000009957	CDC42EP5		131.632	127.685	20.4406	12.8054	73.1408		139.654	129.759	17.7971	20.5046	76.9287
ENSMEUT00000013128	CDC42SE1		197.726	336.745	309.917	330.466	293.713		244.51	303.508	276.296	388.382	303.174
ENSMEUT00000002747	CDC42SE2		5.7574	8.41382	18.5415	14.1397	11.7131		12.6881	13.8961	30.1889	25.3324	20.5264
ENSMEUT00000004704	CDC45		1.46203	0.281195	2.3386	0.538002	1.15496		2.04399	0.468313	3.2707	0.92892	1.67798
ENSMEUT00000001645	CDC6		2.24425	2.31363	3.64475	3.68473	2.97184		1.98005	1.82412	3.45942	4.20183	2.86636
ENSMEUT00000012488	CDC7		7.64853	10.2706	13.8793	19.7319	12.8826		9.21444	11.0268	17.6365	24.6519	15.6324
ENSMEUT00000016523	CDC73		5.36954	7.15274	59.7378	64.1265	34.0966		8.41621	8.47874	67.3186	75.1381	39.8379
ENSMEUT00000013133	CDCA7		0.0216416	0.0408583	0.39935	0.0787781	0.135157		0.150525	0.218407	0.242004	0.246365	0.214325
ENSMEUT00000004430	CDCA7L		1.00115	1.44137	2.41767	3.61971	2.11998		1.32066	1.70228	3.97731	4.42536	2.8564
ENSMEUT00000006460	CDCA8		0.434353	0.477167	0.646771	0.382436	0.485182		0.79137	0.56534	1.17627	1.86903	1.1005
ENSMEUT00000014681	CDCP1		19.23	19.8023	54.771	43.1724	34.2439		22.7667	14.3481	52.9615	40.7469	32.7058
ENSMEUT00000003880	CDCP2		0.0480894	0.0224225	0.55784	0.4025	0.257713		0.0474863	0	0.721081	0.574797	0.335841
ENSMEUT00000009205	CDH1		37.0756	44.6553	171.713	156.278	102.43		54.0457	35.7659	159.104	117.139	91.5136
ENSMEUT00000008260	CDH10		0.0130337	0	0	0	0.00325843		0	0	0	0.0492872	0.0123218
ENSMEUT00000007907	CDH11		1.20462	1.70503	8.47463	10.1545	5.3847		3.18928	2.60365	20.3324	17.5633	10.9222
ENSMEUT00000007849	CDH12		0.151697	0.0109303	1.57879	0.0842499	0.456417		0.462187	0.031862	2.66924	0.263704	0.856748
ENSMEUT00000016317	CDH13		9.99191	13.3235	29.4815	38.4908	22.8219		15.0555	13.7848	52.3713	42.4431	30.9137
ENSMEUT00000000818	CDH15		0.0319255	0.0297841	0.0698927	0.0703315	0.0504834		0.0105106	0.0479419	0	0.0358264	0.0235697
ENSMEUT00000014975	CDH16		0.478952	0.229509	0.182709	0.145982	0.259288		0.284203	0.0961101	0.146854	0.150247	0.169354
ENSMEUT00000009051	CDH17		0	0.0618567	0.190468	0.187663	0.109997		0.0130475	0.0360466	0.143767	0.244521	0.109346
ENSMEUT00000005396	CDH18		0	0.0125775	0	0.0473907	0.014992		0	0.0122015	0.0482504	0.0987446	0.0397991
ENSMEUT00000010039	CDH2		2.24696	4.85105	9.65007	11.678	7.10652		7.23541	4.75483	19.578	13.8611	11.3573
ENSMEUT00000014659	CDH20		0.27019	0.269216	1.83169	1.05884	0.857484		1.66156	0.307608	4.11256	0.915359	1.74927
ENSMEUT00000003485	CDH22		0.409334	0.804469	0.46239	0.573294	0.562372		0.590418	0.691038	0.608949	1.06083	0.737809
ENSMEUT00000000845	CDH24		1.92891	2.19653	1.28133	0.63009	1.50921		3.083	2.65728	1.02044	1.21591	1.99416
ENSMEUT00000005754	CDH3		0.293835	0.424191	1.01606	0.853645	0.646933		0.850055	0.850791	1.5288	2.81038	1.51001
ENSMEUT00000014290	CDH4		0.786211	0.80729	3.28586	2.91935	1.94968		1.35219	0.685272	3.67031	3.57915	2.32173
ENSMEUT00000003575	CDH5		4.10272	6.8633	7.51115	8.79112	6.81707		7.14189	6.11255	12.005	13.3464	9.65146
ENSMEUT00000007477	CDH7		0.137077	0.0966342	2.73497	1.96349	1.23304		0.498505	0.156517	5.21821	2.85208	2.18133
ENSMEUT00000001906	CDH8		0.138716	0.141566	0.640939	0.505966	0.356797		0.205663	0.190504	1.37566	0.924627	0.674114
ENSMEUT00000008632	CDHR1		0.0100397	0	0.0353441	0.0352272	0.0201528		0.0198989	0	0	0	0.00497473
ENSMEUT00000008471	CDHR2		1.97181	33.1216	2.25654	48.0087	21.3397		0.517927	11.1269	0.60562	11.9793	6.05744
ENSMEUT00000003189	CDHR3		6.95397	11.9433	21.873	36.7286	19.3747		7.83309	15.891	24.2082	47.5075	23.8599
ENSMEUT00000010423	CDIP1		15.5172	20.5225	21.5454	22.0748	19.915		20.4839	22.7196	16.1644	21.4946	20.2156
ENSMEUT00000015002	CDIPT		166.035	229.732	129.823	153.412	169.751		196.338	215.42	119.642	157.772	172.293
ENSMEUT00000014879	CDK10		9.2155	10.1198	14.2107	16.2316	12.4444		12.1378	9.09318	19.5519	20.5012	15.321
ENSMEUT00000008847	CDK12		3.57795	5.9762	37.791	36.4522	20.9493		4.6992	5.29207	34.5248	39.1201	20.909
ENSMEUT00000016753	CDK13		10.7087	14.3952	50.9633	51.0989	31.7915		12.4452	14.0214	46.0378	56.6858	32.2976
ENSMEUT00000010077	CDK14		5.53267	9.3108	75.8083	58.3716	37.2558		13.7494	11.1732	106.23	85.772	54.2311
ENSMEUT00000000611	CDK15		0.3254	0.306373	0.359018	0.534528	0.38133		0.247889	0.457191	0.272006	1.02188	0.499742
ENSMEUT00000002758	CDK16		58.9894	40.4541	43.8173	25.1643	42.1063		52.6931	40.375	33.8967	28.202	38.7917
ENSMEUT00000005735	CDK17		13.7114	19.7394	94.8865	101.443	57.4451		18.8285	17.564	84.7251	91.871	53.2471
ENSMEUT00000004926	CDK18		34.7462	41.848	58.11	52.8412	46.8864		40.294	40.0972	41.3153	59.3799	45.2716
ENSMEUT00000006898	CDK19		2.32753	5.33547	47.0974	61.8118	29.1431		3.3996	2.78162	44.4544	53.0807	25.9291
ENSMEUT00000005564	CDK2		3.46192	3.66275	3.40816	4.76024	3.82327		4.82874	5.77299	5.10194	5.95609	5.41494
ENSMEUT00000003915	CDK20		5.03295	6.27955	4.20507	3.44787	4.74136		4.80927	5.90182	2.90635	5.68266	4.82503
ENSMEUT00000009462	CDK2AP1		6.32017	44.3762	8.40718	55.5785	28.6705		6.40003	32.066	13.6515	40.7728	23.2226
ENSMEUT00000005974	CDK2AP2		207.933	277.993	93.8659	66.0002	161.448		215.55	252.66	73.5463	99.4483	160.301
ENSMEUT00000000817	CDK3		36.4847	46.519	21.3472	25.8566	32.5519		35.9493	46.3356	24.7099	37.7246	36.1799
ENSMEUT00000000545	CDK5		68.4074	86.5874	68.8989	71.0931	73.7467		68.7832	86.0581	51.5926	67.5765	68.5026
ENSMEUT00000016815	CDK5R1		0.373806	0.619557	0.471719	0.569631	0.508678		0.540176	0.338658	0.188865	0.38502	0.36318
ENSMEUT00000010232	CDK5RAP1		15.2879	16.4474	28.3391	30.3791	22.6134		14.0787	16.9733	26.3699	32.0685	22.3726
ENSMEUT00000013363	CDK5RAP2		8.18087	6.8282	64.2701	56.5682	33.9618		7.37825	6.71753	68.0451	61.0381	35.7947
ENSMEUT00000009817	CDK5RAP3		123.92	81.7705	139.821	95.8191	110.333		119.799	81.6133	129.941	93.8745	106.307
ENSMEUT00000004246	CDK8		10.7984	13.3879	34.8802	42.5252	25.3979		12.118	14.1294	35.4419	43.2896	26.2447
ENSMEUT00000013078	CDK9		28.0282	34.2401	33.7835	33.8521	32.476		31.6603	36.5703	33.0495	36.0555	34.3339
ENSMEUT00000011920	CDKAL1		8.0397	7.82837	34.2624	35.8348	21.4913		9.70036	8.04568	37.426	27.4519	20.656
ENSMEUT00000010279	CDKL3		4.57676	4.32401	5.19049	8.68291	5.69354		3.64439	5.39903	6.63762	9.86992	6.38774
ENSMEUT00000010291	CDKL4		1.3683	2.41074	9.27607	19.2495	8.07615		1.70816	3.26555	10.267	29.9561	11.2992
ENSMEUT00000004212	CDKL5		2.25257	1.54979	22.491	15.313	10.4016		2.29462	1.83943	24.4371	18.7725	11.8359
ENSMEUT00000011760	CDKN1A		16.0805	22.6224	25.1969	23.8816	21.9453		19.6064	24.0949	23.7791	27.2617	23.6855
ENSMEUT00000005604	CDKN1B		74.826	70.551	145.233	137.519	107.032		71.2802	69.4912	109.724	117.065	91.8901
ENSMEUT00000000582	CDKN2C		15.155	71.7811	12.4982	33.6551	33.2723		10.79	68.7419	3.98636	41.7403	31.3146
ENSMEUT00000003646	CDKN2D		7.58126	19.0597	1.95564	5.68652	8.57078		6.56346	15.8143	1.5826	7.839	7.94984
ENSMEUT00000002505	CDKN3		1.42503	1.12244	11.8133	4.67258	4.75834		1.70738	0.976351	10.5828	11.0071	6.06841
ENSMEUT00000012722	CDON		0.240882	0.20033	1.42948	2.3391	1.05245		0.347274	0.238222	3.38405	5.0461	2.25391
ENSMEUT00000010158	CDR2		19.0205	15.3172	25.9021	16.5516	19.1979		28.0624	15.7023	37.999	23.7052	26.3672
ENSMEUT00000011609	CDS1		12.4265	16.6165	56.5242	66.0265	37.8984		11.3701	14.4863	42.4103	59.4024	31.9173
ENSMEUT00000007963	CDX1		0	0	0	0	0		0	0	0	0	0
ENSMEUT00000003395	CDX2		0	0	0	0	0		0	0	0	0	0
ENSMEUT00000013955	CDYL2		0.286671	0.251593	1.60007	1.32581	0.866036		0.603561	0.457043	3.21593	2.16896	1.61137
ENSMEUT00000001240	CEACAM16		1.69248	0.295235	1.951	0.755931	1.17366		1.22863	0.224794	0.754973	1.16026	0.842164
ENSMEUT00000000064	CEBPB		13.9882	19.3938	8.66763	7.79392	12.4609		18.8089	20.7676	9.36108	10.3193	14.8142
ENSMEUT00000003930	CEBPE		0	0	0	0	0		0	0	0	0.137688	0.034422
ENSMEUT00000011883	CEBPZ		14.0059	14.309	55.1695	63.9348	36.8548		15.3536	14.9535	58.4989	58.5178	36.831
ENSMEUT00000001079	CECR2		0.326576	0.147372	3.10547	2.8887	1.61703		0.197397	0.0713463	3.05387	2.5504	1.46825
ENSMEUT00000011209	CEL		0.367879	0.278411	0.576148	0.479192	0.425407		0.64348	0.396703	0.960429	0.889992	0.722651
ENSMEUT00000006957	CELA1		0.0392679	0.0366976	0.782507	1.57442	0.608223		0	0.142458	1.70477	0.404123	0.562838
ENSMEUT00000007786	CELF1		14.7017	26.8521	72.6262	86.7791	50.2398		24.2195	25.0093	69.8973	88.8906	52.0042
ENSMEUT00000015322	CELF2		0.209486	0.196765	2.47593	2.46858	1.33769		0.565218	0.311575	5.79551	3.99359	2.66647
ENSMEUT00000014610	CELF3		1.8242	1.20883	1.18503	0.698898	1.22924		3.24009	1.81078	1.12677	1.08945	1.81677
ENSMEUT00000007217	CELF4		0	0.024305	0.343999	0	0.092076		0.0513545	0.0939899	0.0860607	0.351923	0.145832
ENSMEUT00000013125	CELF5		0	0	0	0	0		0	0	0	0	0
ENSMEUT00000013542	CELSR1		22.9448	25.6615	92.2259	71.0436	52.9689		26.5804	19.952	64.2383	88.6747	49.8614
ENSMEUT00000012086	CELSR2		9.43111	10.4515	26.2384	17.9934	16.0286		11.4765	8.91399	17.7302	21.4919	14.9031
ENSMEUT00000002678	CEMIP		0.750194	7.58259	10.7386	54.9739	18.5113		0.929879	3.65864	18.6857	66.104	22.3446
ENSMEUT00000013043	CENPA		0.443571	0.27679	0	0.502524	0.305721		0.734265	0.943428	0.506859	0.5164	0.675238
ENSMEUT00000006388	CENPF		0.0672811	0.0664981	1.40565	0.915804	0.613808		0.16382	0.0815154	1.76772	1.49867	0.877931
ENSMEUT00000003325	CENPJ		1.78105	1.34171	6.19284	5.3589	3.66863		1.74087	1.2966	7.34666	6.01865	4.10069
ENSMEUT00000010595	CENPK		14.6102	8.56049	26.2233	21.2471	17.6603		14.0448	7.09699	25.8873	12.8162	14.9613
ENSMEUT00000006549	CENPM		9.74428	11.2507	6.76783	10.5748	9.5844		9.41254	9.35317	2.67733	6.6669	7.02749
ENSMEUT00000004366	CENPN		1.20607	0.587509	1.46776	2.85714	1.52962		0.857856	0.668613	1.36071	2.07055	1.23943
ENSMEUT00000010516	CENPO		0.937359	0.599517	1.65963	1.63598	1.20812		1.3032	0.859826	2.37609	2.28969	1.7072
ENSMEUT00000004203	CENPP		3.87596	1.67207	3.81611	4.97502	3.58479		4.23166	2.2567	3.50009	5.76131	3.93744
ENSMEUT00000009420	CENPW		15.4371	14.4134	13.8314	23.0323	16.6786		23.2651	21.5349	24.757	23.2745	23.2079
ENSMEUT00000003213	CEP104		11.2108	9.28311	74.7944	59.7332	38.7554		12.3504	6.32551	73.0615	70.4572	40.5487
ENSMEUT00000001606	CEP112		3.85252	1.95257	33.4474	23.911	15.7909		3.76001	1.98821	31.688	29.0955	16.6329
ENSMEUT00000013734	CEP120		3.67522	3.31237	32.164	24.263	15.8536		4.19043	3.23641	30.8679	25.5767	15.9679
ENSMEUT00000000981	CEP128		0.360817	0.482732	9.74697	9.30278	4.97332		0.365205	0.484283	10.5499	9.93203	5.33285
ENSMEUT00000013042	CEP131		21.7455	17.292	41.9735	26.6999	26.9277		23.1115	20.3741	41.8969	36.0223	30.3512
ENSMEUT00000010741	CEP135		4.43638	2.90104	27.1713	18.89	13.3497		4.04915	2.45947	25.5203	18.8335	12.7156
ENSMEUT00000004653	CEP152		0.964834	0.588375	5.796	2.76431	2.52838		0.867364	0.51331	6.09824	3.06763	2.63664
ENSMEUT00000013493	CEP162		1.06245	1.22263	4.02695	6.53326	3.21132		0.822169	1.14636	4.55863	6.88255	3.35243
ENSMEUT00000005308	CEP164		5.82558	7.35604	26.361	21.9788	15.3804		8.95364	7.50625	27.4264	26.925	17.7028
ENSMEUT00000010194	CEP170B		5.34385	9.43276	38.2325	36.4795	22.3722		8.08263	5.18034	26.5063	38.5938	19.5908
ENSMEUT00000014967	CEP250		9.11607	7.95149	13.494	11.2561	10.4544		10.5539	7.92075	15.9985	15.1325	12.4014
ENSMEUT00000010606	CEP290		2.3242	1.85871	11.9863	10.8661	6.75883		2.10969	1.90848	13.0428	12.1498	7.30269
ENSMEUT00000002169	CEP350		1.24889	1.08625	43.7846	53.195	24.8287		0.920869	0.657885	42.8443	53.9542	24.5943
ENSMEUT00000009254	CEP41		4.08638	7.28551	13.4132	21.7869	11.643		7.14239	9.14239	17.5388	21.8286	13.913
ENSMEUT00000015093	CEP55		0.171117	0.100958	0.494143	0.160026	0.231561		0.255369	0.216403	1.08776	0.936294	0.623957
ENSMEUT00000007170	CEP57		14.8733	10.1243	62.2145	47.9489	33.7903		15.0422	9.24118	55.9229	49.6899	32.474
ENSMEUT00000006752	CEP57L1		16.2399	12.8452	41.8954	39.8505	27.7078		15.6849	13.2376	42.3186	42.4282	28.4173
ENSMEUT00000005810	CEP63		12.7629	9.10966	24.3858	22.8137	17.268		11.8666	9.50803	25.9373	24.5419	17.9635
ENSMEUT00000014733	CEP70		7.01901	7.56246	29.9804	36.3764	20.2346		8.20143	8.34965	33.8876	38.9912	22.3575
ENSMEUT00000003124	CEP76		0.140384	0.410756	5.78394	8.56812	3.7258		0.262434	0.313576	7.68107	9.86844	4.53138
ENSMEUT00000012407	CEP78		3.46521	3.2084	7.93508	7.01541	5.40602		4.20742	4.16102	10.1599	8.52359	6.76298
ENSMEUT00000012645	CEP83		10.909	7.60454	24.9077	21.5771	16.2496		11.0733	8.97898	31.2032	28.3396	19.8988
ENSMEUT00000007204	CEP85		4.34679	4.26768	13.7667	10.4198	8.20024		5.81278	4.86594	13.8634	13.9342	9.61908
ENSMEUT00000016003	CEP85L		0.310044	0.270316	11.7059	11.3602	5.91162		0.355197	0.196935	14.1585	17.0903	7.95023
ENSMEUT00000012804	CEP89		11.0295	8.12132	58.5365	57.4226	33.7775		9.82346	6.33605	50.7622	49.1144	29.009
ENSMEUT00000006440	CEP97		0.468891	0.373201	17.0261	11.2381	7.27657		0.444415	0.324073	18.0857	14.3269	8.29527
ENSMEUT00000007850	CEPT1		24.1986	27.8092	53.0674	59.0902	41.0414		30.3946	28.7932	56.9105	58.3729	43.6178
ENSMEUT00000007559	CERCAM		7.88261	6.21364	8.25508	4.84528	6.79915		12.2573	9.89272	9.70215	7.0991	9.73782
ENSMEUT00000015167	CERK		9.53223	14.9897	23.3732	30.8458	19.6852		11.2478	12.2393	27.8925	37.9437	22.3308
ENSMEUT00000005686	CERKL		3.49115	6.88601	7.02135	15.5999	8.2496		4.39251	8.72878	9.47353	16.3968	9.7479
ENSMEUT00000006597	CERS2		36.8498	48.1627	54.959	60.7047	50.169		53.7964	52.5714	68.6324	67.3308	60.5828
ENSMEUT00000001082	CERS3		0.506344	0.4503	2.48431	1.73425	1.2938		0.355098	0.328836	2.75273	1.21357	1.16256
ENSMEUT00000001461	CERS4		22.7849	23.5269	17.519	15.5458	19.8441		20.1369	23.5671	13.7139	15.2527	18.1677
ENSMEUT00000004477	CERS5		34.7057	46.441	60.04	71.5259	53.1782		40.1597	48.6763	56.0974	72.1244	54.2644
ENSMEUT00000005025	CERS6		6.43705	7.87252	95.53	193.498	75.8344		2.54827	4.48005	74.3185	164.516	61.4657
ENSMEUT00000016613	CES1		0.0234489	0	0	0.165271	0.04718		0.511612	0.0427293	0.253351	0.0859043	0.223399
ENSMEUT00000007123	CES2		8.35119	7.79812	17.4686	13.1292	11.6868		11.0432	7.89858	20.3651	16.1449	13.8629
ENSMEUT00000010113	CETN3		73.8584	85.0591	114.268	134.813	102		81.7766	87.6816	127.649	129.719	106.707
ENSMEUT00000000159	CETP		0.997841	0.798845	0.912917	1.03385	0.935863		0.715143	0.369926	0.789261	0.736799	0.652782
ENSMEUT00000005515	CFAP100		18.3176	26.356	22.3795	37.35	26.1008		19.1282	33.527	25.5607	53.8272	33.0108
ENSMEUT00000001218	CFAP161		19.7434	33.3906	20.5897	43.8722	29.399		24.2266	47.0678	33.5088	54.106	39.7273
ENSMEUT00000009964	CFAP20		166.338	230.306	194.903	259.748	212.824		165.289	224.776	167.144	275.486	208.174
ENSMEUT00000012604	CFAP36		106.255	80.49	135.655	126.731	112.283		90.3583	86.4353	132.287	117.808	106.722
ENSMEUT00000009429	CFAP43		5.42171	7.74815	20.3858	39.7017	18.3143		5.36843	10.0714	26.0739	45.9631	21.8692
ENSMEUT00000011351	CFAP45		5.57169	7.90126	13.1953	15.743	10.6028		6.11887	8.99578	11.6927	23.5242	12.5829
ENSMEUT00000012040	CFAP52		9.00217	10.9861	16.6486	28.1524	16.1973		11.1188	14.5347	21.7301	32.8069	20.0476
ENSMEUT00000007614	CFAP53		10.7099	16.9705	25.2984	42.7646	23.9359		12.7788	22.7647	30.5103	54.7309	30.1962
ENSMEUT00000014534	CFAP58		0.0838851	0.192682	1.94027	3.95232	1.54229		0.178696	0.28688	2.59423	5.38074	2.11014
ENSMEUT00000004661	CFAP61		0.734435	1.47377	4.51083	9.78438	4.12585		0.945386	2.35909	5.84179	11.3483	5.12364
ENSMEUT00000013585	CFAP65		5.58212	10.1014	5.04973	9.07539	7.45216		6.23032	12.4868	4.8735	12.6846	9.06881
ENSMEUT00000006635	CFAP69		14.6628	23.6091	32.4554	56.4452	31.7931		15.6598	26.9517	35.0945	61.0068	34.6782
ENSMEUT00000010965	CFAP70		11.908	15.0917	26.8838	34.4328	22.0791		14.0984	19.0123	28.7132	39.962	25.4465
ENSMEUT00000015423	CFAP73		42.6222	73.7788	26.4215	47.5203	47.5857		43.8796	101.29	30.033	66.4854	60.422
ENSMEUT00000014905	CFAP77		1.46142	2.76224	1.73839	2.59648	2.13963		1.88426	3.28621	1.86144	4.80211	2.9585
ENSMEUT00000011987	CFD		231.785	314.959	137.839	214.581	224.791		385.263	282.925	169.693	197.367	258.812
ENSMEUT00000002291	CFDP1		7.94232	10.8708	71.3123	71.2	40.3314		11.6494	8.97822	72.6295	75.8813	42.2846
ENSMEUT00000003744	CFI		51.3708	55.7992	86.1333	98.9718	73.0688		59.0967	59.1514	88.1988	98.9748	76.3554
ENSMEUT00000007367	CFL1		137.128	189.413	140.668	140.773	151.995		225.699	256.721	145.731	172.888	200.26
ENSMEUT00000000740	CFL2		110.631	102.093	229.041	202.639	161.101		126.91	115.542	222.964	182.058	161.868
ENSMEUT00000008127	CFLAR		7.70787	8.77633	62.1986	51.1555	32.4596		10.2501	7.2166	63.3025	51.3697	33.0347
ENSMEUT00000013521	CGA		0.404865	0	0.532919	0	0.234446		0.134736	0.125077	2.17238	0	0.608048
ENSMEUT00000002338	CGGBP1		13.5023	22.1288	89.4143	92.4843	54.3824		20.9408	19.7416	87.931	98.1424	56.689
ENSMEUT00000008414	CGN		46.1153	43.9127	115.228	82.4725	71.9321		54.786	38.7927	90.5615	78.8044	65.7361
ENSMEUT00000002651	CGNL1		2.78502	2.50872	21.6302	18.885	11.4522		3.55827	1.74417	39.71	29.0602	18.5182
ENSMEUT00000011309	CGREF1		0.356851	0.386497	0.844604	0.658181	0.561533		0.654556	0.970531	1.41345	0.965213	1.00094
ENSMEUT00000000784	CGRRF1		10.2163	8.60096	24.4309	22.6319	16.47		11.477	10.6058	30.1128	22.9198	18.7788
ENSMEUT00000003886	CHAC1		1.19821	11.6465	0.941238	10.9573	6.18581		0.924928	10.5408	1.08146	8.96702	5.37855
ENSMEUT00000014856	CHAC2		2.552	6.96802	7.40809	13.6492	7.64433		2.92802	5.36611	11.8186	11.9667	8.01986
ENSMEUT00000006154	CHAD		0.153097	0.309904	5.56052	5.17168	2.7988		0.429993	0.0692625	5.11903	6.06002	2.91958
ENSMEUT00000010528	CHAF1A		0.394706	0.251019	1.27518	0.970722	0.722907		0.899459	0.517601	2.30195	1.60075	1.32994
ENSMEUT00000006905	CHAF1B		0.692303	1.09966	3.1762	3.12051	2.02217		1.17785	0.994551	6.02717	7.26132	3.86522
ENSMEUT00000012330	CHAT		0.133054	0.0277818	0.0523861	0.0518552	0.0662693		0.161211	0.107777	0	0	0.067247
ENSMEUT00000005918	CHCHD1		0	0	0	0	0		0	0	0	0	0
ENSMEUT00000012577	CHCHD2		672.873	643.623	400.239	409.381	531.529		642.385	648.027	398.584	396.864	521.465
ENSMEUT00000007866	CHCHD3		37.1768	46.5111	101.133	107.8	73.1552		42.6158	46.4518	98.0509	103.222	72.5851
ENSMEUT00000010707	CHCHD4		43.4774	63.3547	51.0777	78.3203	59.0575		45.2779	63.386	46.581	70.3387	56.3959
ENSMEUT00000016140	CHCHD5		279.099	352.366	120.825	114.428	216.679		233.292	307.421	109.239	153.345	200.824
ENSMEUT00000004527	CHCHD7		107.387	108.358	113.926	164.835	123.626		112.038	118.581	142.444	154.296	131.84
ENSMEUT00000001737	CHD1		11.03	7.72847	78.0022	75.1534	42.9785		9.81231	6.52226	74.8711	71.6499	40.7139
ENSMEUT00000014974	CHD1L		9.34143	6.03805	20.9347	14.1872	12.6253		8.39034	5.30661	21.7786	13.7117	12.2968
ENSMEUT00000001550	CHD2		3.3223	2.36176	80.6264	77.2668	40.8943		2.31894	1.51734	80.2654	76.356	40.1144
ENSMEUT00000005880	CHD3		49.6968	50.089	102.498	78.9681	70.313		71.0538	60.4347	122.191	111.098	91.1944
ENSMEUT00000015340	CHD4		40.4771	54.761	106.42	122.976	81.1585		48.9238	54.3022	105.803	134.393	85.8555
ENSMEUT00000008802	CHD5		0.0736974	0.172563	0.399863	0.879698	0.381455		0.0770165	0.133832	0.819866	1.17437	0.551271
ENSMEUT00000008822	CHD6		5.71678	4.52156	57.9804	45.9764	28.5488		5.06374	3.5035	58.1991	52.6346	29.8502
ENSMEUT00000010111	CHD7		1.68678	1.72592	15.1706	8.79618	6.84487		1.50924	1.41037	15.6816	10.6557	7.31423
ENSMEUT00000011797	CHD8		19.5538	19.7724	49.041	45.499	33.4665		21.4179	17.7636	48.4803	51.8364	34.8745
ENSMEUT00000008272	CHD9		1.69567	1.2216	59.534	62.905	31.3391		1.46082	0.746474	65.5787	63.3105	32.7741
ENSMEUT00000009223	CHDH		0.216885	0.592997	1.1557	1.89998	0.96639		0.50605	0.785943	0.898574	1.29478	0.871337
ENSMEUT00000001445	CHEK1		0.928751	0.497462	1.70475	0.844005	0.993742		1.3796	0.597887	3.98768	2.15317	2.02958
ENSMEUT00000010876	CHERP		15.2866	18.1601	32.3454	26.5856	23.0944		22.3158	22.1438	28.2787	31.468	26.0516
ENSMEUT00000005393	CHFR		10.2531	18.9305	44.1942	65.5559	34.7334		11.8056	15.6511	39.013	64.5851	32.7637
ENSMEUT00000010408	CHGA		0.296939	0.377309	2.2692	1.19709	1.03513		0.168238	0.386334	1.98453	2.56871	1.27695
ENSMEUT00000009207	CHI3L1		0.270937	0.76226	0.703077	1.04017	0.694111		0.976794	1.63031	2.23727	1.56445	1.60221
ENSMEUT00000011803	CHI3L2		0.027213	0.051144	0	0	0.0195893		0	0	0	0	0
ENSMEUT00000000086	CHIC1		0.381324	0.312232	0.981759	0.849118	0.631108		0.236489	0.348547	1.51491	2.2206	1.08014
ENSMEUT00000004296	CHIC2		33.6051	50.2735	191.487	208.145	120.878		45.3891	53.4466	204.755	183.09	121.67
ENSMEUT00000006175	CHID1		37.6607	44.4826	35.7096	40.1258	39.4947		41.7685	44.414	36.6102	46.6957	42.3721
ENSMEUT00000001040	CHIT1		0.146751	0.197143	0.0731069	1.09492	0.37798		0.0208149	0.0954132	0.0733761	0	0.0474011
ENSMEUT00000014528	CHKA		80.2764	75.6739	91.5343	88.8836	84.0921		53.9053	67.7306	65.6516	94.3107	70.3996
ENSMEUT00000006588	CHL1		0.896239	2.2002	15.8703	29.8318	12.1996		0.798627	1.41972	13.6994	25.6828	10.4001
ENSMEUT00000015295	CHMP1B		50.8673	68.3496	200.319	179.827	124.841		73.6023	72.4716	164.719	174.181	121.243
ENSMEUT00000013567	CHMP2A		315.412	278.018	175.873	172.438	235.435		286.66	296.877	172.204	169.707	231.362
ENSMEUT00000012224	CHMP2B		15.6452	13.8064	46.0616	40.43	28.9858		19.1342	17.0437	47.7072	38.8087	30.6734
ENSMEUT00000010924	CHMP4A		80.9606	71.7505	70.2827	55.8311	69.7062		75.0652	72.0062	60.3411	60.3537	66.9416
ENSMEUT00000002885	CHMP4B		86.5621	114.531	85.411	86.9676	93.3679		107.437	123.409	69.5421	88.3216	97.1774
ENSMEUT00000010089	CHMP4C		16.2332	11.3831	38.9557	25.0193	22.8978		17.7056	9.05013	32.3756	22.2253	20.3392
ENSMEUT00000015539	CHMP5		80.1824	106.009	178.13	193.376	139.424		93.3228	104.899	173.564	179.894	137.92
ENSMEUT00000003329	CHMP6		15.7607	26.06	79.3536	86.4935	51.9169		22.4935	26.2156	89.7045	88.7685	56.7955
ENSMEUT00000004276	CHMP7		17.5889	22.8955	35.3083	40.4445	29.0593		20.1075	22.2654	32.5673	44.0507	29.7477
ENSMEUT00000008021	CHN1		29.1693	32.9851	51.6589	49.8375	40.9127		26.7889	28.448	37.6106	45.5024	34.5875
ENSMEUT00000010050	CHN2		6.41691	3.17083	18.8859	6.96815	8.86045		8.09285	4.30151	19.7859	7.50617	9.92161
ENSMEUT00000008215	CHORDC1		7.58686	7.59375	51.3672	53.6992	30.0618		7.79068	9.42552	48.6577	49.0341	28.727
ENSMEUT00000009627	CHP1		112.205	214.988	224.301	328.466	219.99		175.919	226.485	218.351	319.62	235.094
ENSMEUT00000007309	CHP2		0.403291	0.217048	0.841527	0.419269	0.470284		0.573466	0.210962	1.4898	1.29547	0.892424
ENSMEUT00000004112	CHPF		16.5488	25.4136	10.6356	11.4999	16.0245		26.7506	29.174	15.4898	18.0411	22.3639
ENSMEUT00000008297	CHPF2		13.5234	18.4093	13.3647	14.2513	14.8872		16.2011	18.7646	13.1014	19.8335	16.9751
ENSMEUT00000012311	CHPT1		9.42512	10.2288	18.9883	20.6423	14.8211		12.3447	11.9545	23.463	27.7528	18.8788
ENSMEUT00000008873	CHRAC1		65.0787	64.145	87.3862	88.8744	76.3711		66.4607	64.543	86.1514	92.9123	77.5169
ENSMEUT00000014229	CHRD		2.21122	3.60172	2.43593	2.25097	2.62496		5.20319	7.08465	3.67107	4.14324	5.02554
ENSMEUT00000010122	CHRDL2		2.19283	1.76345	1.65066	1.43915	1.76152		5.98772	4.63272	5.12374	5.09838	5.21064
ENSMEUT00000003549	CHRM1		3.82843	3.0807	3.83355	2.06524	3.20198		6.18649	5.02682	4.20246	3.3404	4.68904
ENSMEUT00000005195	CHRM2		0.0401988	0.018923	0.142644	0.351584	0.138337		0.0802744	0	0.937221	0.294199	0.327924
ENSMEUT00000003637	CHRNA1		0	0.0584394	0	0.113745	0.0430461		0	0	0	0.237215	0.0593038
ENSMEUT00000009591	CHRNA10		0.0190628	0	0	0	0.0047657		0.0189073	0	0	0	0.00472682
ENSMEUT00000004563	CHRNA2		0	0.0649173	1.50743	0.62493	0.549319		0.0228569	0.0209131	1.19563	0.735753	0.493788
ENSMEUT00000010356	CHRNA3		0.0246363	0	0	0	0.00615907		0.0487581	0	0.171621	0.0874818	0.0769652
ENSMEUT00000006748	CHRNA4		0	0.0140028	0	0.103123	0.0292815		0.0886811	0.040571	0.312157	0.0533522	0.12369
ENSMEUT00000011307	CHRNA6		0.0602877	0.189634	0.0783032	0.534862	0.215772		0.0996845	0.147778	0.23764	0.484922	0.242506
ENSMEUT00000010173	CHRNA9		0.123298	0.0192775	0.737058	0.364954	0.311147		0.0811447	0.0746314	0.14868	0.914399	0.304714
ENSMEUT00000008946	CHRNB1		1.79424	1.79758	3.8463	1.91214	2.33756		2.67295	2.99853	2.64204	3.02595	2.83487
ENSMEUT00000003737	CHRNB2		0.0721437	0.0507543	0.125394	0.12463	0.0932305		0.0178342	0	0	0.193194	0.052757
ENSMEUT00000011389	CHRNB3		0.0232791	0	0	0	0.00581978		0.0231403	0	0	0	0.00578507
ENSMEUT00000001048	CHRNB4		0	0	0	0	0		0.0224091	0	0	0	0.00560228
ENSMEUT00000011521	CHRND		0	0	0	0	0		0	0	0	0	0
ENSMEUT00000012225	CHRNE		0.406673	0.348077	0.611279	0.914038	0.570017		0.940582	0.643292	0.798852	1.51021	0.973234
ENSMEUT00000011541	CHRNG		0.0171583	0.112641	0	0.0568498	0.0466623		0.0170054	0.248544	0	0.467255	0.183201
ENSMEUT00000002134	CHST1		1.57486	12.4132	1.39638	4.87064	5.06377		3.17847	27.439	1.33565	7.35686	9.8275
ENSMEUT00000005136	CHST10		32.9734	10.6821	68.7981	25.9016	34.5888		32.0839	9.76253	76.3749	28.0869	36.5771
ENSMEUT00000011050	CHST11		0.240576	1.10052	2.1561	5.31598	2.20329		0.979446	0.997219	3.03135	5.50675	2.62869
ENSMEUT00000012993	CHST12		4.14024	5.34613	3.37421	4.08644	4.23676		6.30549	8.80604	9.18893	7.84464	8.03627
ENSMEUT00000004545	CHST13		2.96354	11.4618	4.65183	14.9399	8.50427		7.00832	16.7986	11.1944	18.3646	13.3415
ENSMEUT00000001478	CHST14		2.65832	4.63496	3.47162	2.85963	3.40613		6.50612	7.88581	3.84434	5.07335	5.82741
ENSMEUT00000012534	CHST15		2.63059	4.96072	17.0352	19.8507	11.1193		4.68696	4.17902	27.5905	24.0523	15.1272
ENSMEUT00000011489	CHST2		5.23793	3.52607	2.79448	1.57585	3.28358		11.4107	5.65004	6.21081	3.38272	6.66357
ENSMEUT00000009137	CHST3		1.37382	2.10473	2.08819	1.63665	1.80085		4.09634	2.84485	3.3389	2.84146	3.28039
ENSMEUT00000002632	CHST8		0.0208138	0.410542	0	0.76981	0.300291		0	0.226791	0.0700921	1.14799	0.361218
ENSMEUT00000016480	CHST9		0	0.0218185	0	0	0.00545463		0	0	0	0	0
ENSMEUT00000006948	CHSY1		0.931132	2.10971	6.36842	10.1669	4.89404		2.39052	3.06582	12.2477	14.5605	8.06613
ENSMEUT00000007630	CHTF18		3.67187	2.76143	3.60685	2.8384	3.21964		3.25832	2.74126	3.97549	3.28193	3.31425
ENSMEUT00000010292	CHTOP		214.306	235.582	234.413	209.706	223.502		222.794	216.086	215.6	246.811	225.323
ENSMEUT00000003628	CHUK		25.581	26.2578	86.9419	85.9698	56.1876		30.3982	26.0056	80.6879	79.5417	54.1583
ENSMEUT00000010545	CIAO1		32.2862	29.8325	33.4975	30.2477	31.466		40.7456	35.1342	35.8995	29.2761	35.2639
ENSMEUT00000014758	CIAPIN1		22.0439	31.3854	38.9936	58.8918	37.8287		31.4201	30.1251	44.3613	58.3419	41.0621
ENSMEUT00000006845	CIART		1.59628	2.29806	1.92452	1.73962	1.88962		2.48062	3.6036	2.61195	2.49938	2.79889
ENSMEUT00000009264	CIB1		270.933	265.281	215.167	232.773	246.038		276.584	261.088	195.443	215.346	237.115
ENSMEUT00000009336	CIB2		3.32107	6.02256	2.87787	4.01522	4.05918		7.34791	6.88447	4.73667	4.13593	5.77624
ENSMEUT00000016697	CIC		44.3138	52.6521	18.6057	13.125	32.1741		52.355	52.8231	15.2346	18.783	34.7989
ENSMEUT00000000482	CIDEA		2.49503	29.0727	5.60829	40.2945	19.3676		2.29647	19.6332	8.00902	21.0052	12.736
ENSMEUT00000013310	CIDEB		0.104012	0.730182	0.87831	0.348969	0.515368		2.58718	0.993414	0.70822	0.720496	1.25233
ENSMEUT00000013146	CIDEC		0.0878397	0.0822598	0	0	0.0425249		0	0.119994	0	0.473397	0.148348
ENSMEUT00000015056	CIITA		2.06912	0.567842	8.87395	2.17591	3.42171		2.89705	0.622186	9.93167	2.64551	4.0241
ENSMEUT00000009480	CILP		0.291874	0.1916	1.20281	0.650083	0.584092		0.621153	0.185167	1.48698	0.82471	0.779502
ENSMEUT00000009469	CILP2		0	0.0281521	0	0.0751037	0.0258139		0.014903	0.0339762	0.0248555	0.101868	0.0439007
ENSMEUT00000007783	CINP		10.674	13.0339	28.2554	26.0071	19.4926		9.67955	12.7354	27.6229	25.5876	18.9064
ENSMEUT00000012866	CIR1		16.8227	13.7427	22.4948	14.4815	16.8854		17.246	13.7772	18.7947	16.2669	16.5212
ENSMEUT00000004556	CISH		4.72038	3.8777	4.17154	2.91726	3.92172		6.72773	4.39214	5.77357	2.15738	4.76271
ENSMEUT00000003534	CIT		0.0518888	0.108885	0.308345	0.551014	0.255033		0.0947519	0.0727566	0.518027	0.467937	0.288368
ENSMEUT00000004719	CITED2		57.3087	50.6723	53.7466	40.127	50.4637		55.8587	47.5915	49.308	39.7632	48.1303
ENSMEUT00000008629	CKAP2		1.95114	1.93454	7.33291	6.22197	4.36014		2.62341	2.46267	9.98113	6.59398	5.4153
ENSMEUT00000001067	CKAP4		38.005	46.4512	82.0961	71.6418	59.5485		53.5667	46.2056	66.2555	70.1958	59.0559
ENSMEUT00000012414	CKAP5		21.0735	20.8019	54.7799	51.8174	37.1182		23.2311	18.493	54.3203	57.6725	38.4292
ENSMEUT00000011912	CKM		0.232127	0.297657	0.0947038	0.381506	0.251498		0.22985	0.235938	0.286614	0.0976004	0.212501
ENSMEUT00000012953	CKMT2		0.147827	0.0923035	0.0875747	0.0874483	0.103788		0.364908	0.179007	0.0886469	0	0.15814
ENSMEUT00000002915	CKS1B		8.73877	7.3685	22.2702	16.3397	13.6793		15.6468	7.93612	14.1458	4.35129	10.52
ENSMEUT00000001371	CLASP1		4.04285	3.24736	54.9801	43.77	26.5101		2.92225	1.82415	55.9096	47.1326	26.9472
ENSMEUT00000008454	CLASP2		12.3626	22.7959	20.7576	30.859	21.6938		13.0649	20.3588	18.2047	35.407	21.7588
ENSMEUT00000010033	CLASRP		69.6084	62.0452	37.2821	28.8334	49.4423		60.8073	64.1936	31.7684	38.6998	48.8673
ENSMEUT00000003484	CLCA1		1.11059	0.513982	2.15085	1.68675	1.36554		1.1312	0.909001	2.32288	1.32905	1.42303
ENSMEUT00000004817	CLCA2		2.47767	0.212766	4.83156	0.205219	1.9318		2.21154	0.214751	4.65912	0.355479	1.86022
ENSMEUT00000003967	CLCF1		1.97161	3.0015	0.235929	0.602137	1.45279		4.33877	4.19669	1.07019	0.970192	2.64396
ENSMEUT00000015992	CLCN1		0.330222	0.348325	0.318912	0.459809	0.364317		0.183503	0.280635	0.426588	0.436277	0.331751
ENSMEUT00000010946	CLCN2		2.12581	2.05393	1.34158	1.58715	1.77712		4.26076	3.48306	2.87203	2.96706	3.39573
ENSMEUT00000003237	CLCN3		21.7536	31.6549	125.16	147.88	81.6121		24.8083	22.0138	111.721	125.063	70.9015
ENSMEUT00000007601	CLCN4		5.82394	5.65069	20.502	15.5292	11.8765		7.4959	4.93709	21.6794	16.3502	12.6156
ENSMEUT00000016507	CLCN5		6.5427	9.21883	35.7885	31.217	20.6918		8.76774	8.82132	23.9007	33.8744	18.841
ENSMEUT00000003178	CLCN6		5.46782	7.89686	19.9683	20.3405	13.4184		7.29434	5.03716	19.321	20.191	12.9609
ENSMEUT00000014394	CLCN7		9.64846	6.57296	29.1961	18.7953	16.0532		9.31458	4.50652	26.1064	19.4357	14.8408
ENSMEUT00000006366	CLDN1		45.2467	37.7989	53.1965	23.4555	39.9244		50.1125	33.2634	25.4286	19.1847	31.9973
ENSMEUT00000014770	CLDN10		497.645	531.621	710.929	797.172	634.342		500.081	417.137	705.285	539.049	540.388
ENSMEUT00000006589	CLDN11		0.346549	0.461447	0.163007	0.328359	0.32484		1.96223	1.42933	1.48746	2.34769	1.80668
ENSMEUT00000002146	CLDN14		0	0	0	0	0		0	0	0	0.156193	0.0390482
ENSMEUT00000009159	CLDN16		0.0331714	0	0	0.23212	0.0663229		0	0	0.116929	0	0.0292323
ENSMEUT00000009953	CLDN18		0.302069	0.562936	0.924644	1.23161	0.755315		2.51717	0.701685	2.6447	1.75061	1.90354
ENSMEUT00000014924	CLDN19		0	0.0420987	0	0	0.0105247		0.0891307	0	0	0	0.0222827
ENSMEUT00000002649	CLDN2		0.128331	0	0	0	0.0320828		0.0423639	0.0384072	0	0.145028	0.0564498
ENSMEUT00000001708	CLDN20		0.254375	1.09604	3.02106	5.11758	2.37226		0.453791	1.06464	3.76397	1.64653	1.73223
ENSMEUT00000013252	CLDN4		51.1582	71.6275	32.4998	33.5191	47.2011		51.1764	53.6218	19.9311	23.5564	37.0714
ENSMEUT00000016612	CLDN6		0.741428	0.379216	0.890681	0.888908	0.725058		1.13201	0.552174	0.901924	0.464025	0.762533
ENSMEUT00000001599	CLDN8		700.039	478.989	603.742	459.815	560.646		691.138	393.91	598.751	310.464	498.566
ENSMEUT00000003250	CLDN9		0.62511	1.00684	0.371836	0.376371	0.595039		1.18826	1.12739	0.375436	0.384331	0.768854
ENSMEUT00000001154	CLDND1		35.8205	45.4414	70.2604	72.8678	56.0975		56.7853	54.82	85.6583	70.0232	66.8217
ENSMEUT00000008403	CLEC11A		1.57194	1.64817	0.611485	0.264527	1.02403		4.87618	3.62263	0.790204	1.25845	2.63687
ENSMEUT00000016520	CLEC16A		1.42846	2.19015	48.3097	55.5323	26.8652		1.68708	1.7658	43.8284	51.6875	24.7422
ENSMEUT00000011009	CLEC1A		3.12838	1.5108	3.75467	2.81524	2.80227		3.90742	2.72477	4.80207	2.5176	3.48796
ENSMEUT00000003019	CLEC1B		0	0	0	0	0		0	0	0.657265	0.445686	0.275738
ENSMEUT00000012226	CLEC4E		0	0.0570373	0.460377	0.457257	0.243668		0.180517	0.0558861	0.469999	0.238947	0.236337
ENSMEUT00000014588	CLGN		0.88095	1.57228	1.32862	3.46546	1.81183		1.3899	2.64749	4.15889	6.29045	3.62168
ENSMEUT00000004729	CLHC1		18.4905	8.17893	29.0973	22.0653	19.458		13.582	9.61464	29.6784	24.6639	19.3847
[truncated: 14,840 more rows]
