# Supplementary material for: Evolutionary transcriptomics implicates HAND2 in the origins of implantation and regulation of gestation length
Source: eLife. 2021 Feb 1;10:e61257. doi: 10.7554/eLife.61257 (PMC7943190; doi:10.7554/eLife.61257)
Supplement: Figure 1—source data 1. [file elife-61257-fig1-data1.xlsx]

## Sheet: Figure 1—source data 1
Figure 1—source data 1. Species and gene expression information. Species names (common and binomial), reproductive and parity mode, placenta type, genome annotations used for RNA-Seq analysis, transcriptome type and accession numbers.
Species (common name)	Species (binomial name)	Reproductive mode	Parity mode	Placenta type	Genome annotation	Transcriptome type	Acession number
Human	Homo sapiens	Viviparous	Pregnant	hemochorial	GRCh38.p13	RNA-Seq/Kallisto	SRX890434, SRX890462, SRX890518
Baboon	Papio anubis	Viviparous	Pregnant	hemochorial	Panu_3.0	RNA-Seq/Kallisto	GSE155170
Rhesus monkey	Macaca mulatta	Viviparous	Pregnant	hemochorial	Mmul_10	RNA-Seq/Kallisto	SRX087151, SRX087152
Rabbit	Oryctolagus cuniculus	Viviparous	Pregnant	hemochorial	OryCun2.0	RNA-Seq/Kallisto	SRX1489435, SRX1489436, SRX1489437
Thirteen-lined ground squirrel	Ictidomys tridecemlineatus	Viviparous	Pregnant	hemochorial	SpeTri2.0	RNA-Seq/Kallisto	GSE155170
Golden Hamster	Mesocricetus auratus	Viviparous	Pregnant	hemochorial	MesAur1.0	RNA-Seq/Kallisto	GSE155170
Mouse	Mus musculus	Viviparous	Pregnant	hemochorial	GRCm38.p6	RNA-Seq/Kallisto	GSE155170
Seba's short-tailed bat	Carollia perspicillata	Viviparous	Pregnant	hemochorial	CarPer_v1_BIUU	RNA-Seq/Kallisto	GSE155170
Dog	Canis lupus familiaris	Viviparous	Pregnant	endotheliochorial	CanFam3.1	RNA-Seq/Kallisto	GSE57714
Horse	Equus caballus	Viviparous	Pregnant	epitheliochorial	EquCab3.0	RNA-Seq/Kallisto	GSE141450
Pig	Sus scrofa	Viviparous	Pregnant	epitheliochorial	Sscrofa11.1	RNA-Seq/Kallisto	GSE43667
Cow	Bos taurus	Viviparous	Pregnant	epitheliochorial	ARS-UCD1.2	RNA-Seq/Kallisto	GSM2882916
Sheep	Ovis aries	Viviparous	Pregnant	epitheliochorial	Oar_rambouillet_v1.0	RNA-Seq/Kallisto	SRR7062126
Goat	Capra hircus	Viviparous	Pregnant	epitheliochorial	ARS1	RNA-Seq/Kallisto	SRX958169
Armadillo	Dasypus novemcinctus	Viviparous	Pregnant	hemochorial	Dasnov3.0	RNA-Seq/Kallisto	GSE30708
Short-tailed opossum	Monodelphis domestica	Viviparous	Pregnant	epitheliochorial	MonDom5	RNA-Seq/Kallisto	GSE30708
Fat-tailed dunnart	Sminthopsis crassicaudata	Viviparous	Pregnant	endotheliochorial	de novo	RNA-Seq/Kallisto	SRX3108600, SRX3108599, SRX3108597
Tamar wallaby	Notamacropus eugenii	Viviparous	Pregnant	epitheliochorial	Meug_1.1	RNA-Seq/Kallisto	DRX012238, DRX012239, DRX012257, DRX012240
Platypus	Ornithorhynchus anatinus	Oviparous	Gravid	NA	mOrnAna1.p.v1	RNA-Seq/Kallisto	GSE57714
Chicken	Gallus gallus	Oviparous	Gravid	NA	GRCg6a	RNA-Seq/Kallisto	SRX180570
Duck	Anas platyrhynchos	Oviparous	Gravid	NA	IASCAAS_PekingDuck_PBH1.5	RNA-Seq/Kallisto	SRR7031356
Ocellated skink	Chalcides ocellatus	Viviparous	Pregnant	epi/endothelolchorial	de novo	RNA-Seq/Kallisto	PMID: 22333490
Common garden skink	Lampropholis guichenoti	Oviparous	Gravid	NA	de novo	RNA-Seq/Kallisto	SRX2188824, SRX2188823, SRX2188822, SRX2188821
Southern grass skink	Pseudemoia entrecasteauxii	Viviparous	Pregnant	epitheliochorial	de novo	RNA-Seq/Kallisto	SRX498626, SRX498625, SRX498615, SRX497586, SRX497584, SRX497582
Bougainville's skink	Lerista bougainvillii	Oviparous	Gravid	NA	de novo	RNA-Seq/Kallisto	SRX2188820, SRX2188819, SRX2188818, SRX2188817
Three-toed skink	Saiphos equalis	Oviparous	Gravid	NA	de novo	RNA-Seq/Kallisto	SRS4641453, SRS4641450, SRS4641449
Three-toed skink	Saiphos equalis	Viviparous	Pregnant	epitheliochorial	de novo	RNA-Seq/Kallisto	SRS4641436, SRS4641437, SRS4641439
Frog	Xenopus tropicalis	Oviparous	Gravid	NA	Ensembl (64 v37) and JGI v3.0	Microarray	GSM325317
