# Supplementary material for: Evolutionary transcriptomics implicates HAND2 in the origins of implantation and regulation of gestation length
Source: eLife. 2021 Feb 1;10:e61257. doi: 10.7554/eLife.61257 (PMC7943190; doi:10.7554/eLife.61257)
Supplement: Figure 1—source data 4. [file elife-61257-fig1-data4.xlsx]

## Sheet: Figure 1—source data 4
Figure 1—source data 4. Top 100 pathways (Wikipathway, Reactome, KEGG) in which Eutherian recruited genes are enriched.
Gene Set	Description	Size	Expect	Ratio	P Value	FDR
R-HSA-1280215	Cytokine Signaling in Immune system	621	5.8917	3.0551	1.9667e-05	0.054104
R-HSA-449147	Signaling by Interleukins	427	4.0512	3.4558	4.8957e-05	0.067341
R-HSA-389359	CD28 dependent Vav1 pathway	12	0.11385	26.35	0.00017164	0.12628
R-HSA-372790	Signaling by GPCR	738	7.0018	2.5708	0.00018362	0.12628
hsa04664	Fc epsilon RI signaling pathway	65	0.61669	8.1078	0.00036779	0.20236
WP247	Small Ligand GPCRs	18	0.17077	17.567	0.00061079	0.2497
R-HSA-388396	GPCR downstream signalling	679	6.442	2.4837	0.00063538	0.2497
R-HSA-512988	Interleukin-3, Interleukin-5 and GM-CSF signaling	45	0.42694	9.3691	0.00084605	0.29094
WP286	IL-3 Signaling Pathway	48	0.4554	8.7835	0.0010811	0.33046
hsa04925	Aldosterone synthesis and secretion	91	0.86336	5.7913	0.0017046	0.38521
WP4559	Interactions between immune cells and microRNAs in tumor microenvironment	27	0.25616	11.711	0.0020578	0.38521
WP304	Kit receptor signaling pathway	58	0.55027	7.2691	0.0021925	0.38521
hsa04927	Cortisol synthesis and secretion	59	0.55976	7.1459	0.002335	0.38521
R-HSA-164944	Nef and signal transduction	8	0.0759	26.35	0.0024056	0.38521
hsa04916	Melanogenesis	99	0.93926	5.3233	0.0024698	0.38521
R-HSA-2424491	DAP12 signaling	29	0.27514	10.904	0.0025356	0.38521
WP453	Inflammatory Response Pathway	29	0.27514	10.904	0.0025356	0.38521
R-HSA-168256	Immune System	1821	17.277	1.6786	0.0026486	0.38521
hsa05200	Pathways in cancer	500	4.7437	2.5296	0.0027146	0.38521
R-HSA-388841	Costimulation by the CD28 family	62	0.58822	6.8001	0.0028005	0.38521
WP474	Endochondral Ossification	64	0.6072	6.5876	0.003144	0.40328
hsa05340	Primary immunodeficiency	32	0.3036	9.8814	0.0033716	0.40328
R-HSA-2871809	FCERI mediated Ca+2 mobilization	32	0.3036	9.8814	0.0033716	0.40328
R-HSA-389356	CD28 co-stimulation	33	0.31309	9.582	0.0036835	0.40533
R-HSA-114604	GPVI-mediated activation cascade	33	0.31309	9.582	0.0036835	0.40533
R-HSA-5579029	Metabolic disorders of biological oxidation enzymes	34	0.32257	9.3002	0.0040123	0.42453
R-HSA-9020558	Interleukin-2 signaling	11	0.10436	19.164	0.0046383	0.45571
R-HSA-210990	PECAM1 interactions	11	0.10436	19.164	0.0046383	0.45571
R-HSA-2172127	DAP12 interactions	37	0.35104	8.5461	0.0051038	0.46802
WP3941	Oxidative Damage	37	0.35104	8.5461	0.0051038	0.46802
WP1449	Regulation of toll-like receptor signaling pathway	119	1.129	4.4286	0.0054347	0.47732
WP3937	Microglia Pathogen Phagocytosis Pathway	39	0.37001	8.1078	0.0059215	0.47732
hsa04380	Osteoclast differentiation	122	1.1575	4.3197	0.0060324	0.47732
R-HSA-451927	Interleukin-2 family signaling	40	0.3795	7.9051	0.006358	0.47732
hsa04020	Calcium signaling pathway	175	1.6603	3.6138	0.0063643	0.47732
R-HSA-200425	Import of palmitoyl-CoA into the mitochondrial matrix	13	0.12334	16.216	0.0064971	0.47732
WP702	Metapathway biotransformation Phase I and II	176	1.6698	3.5932	0.0065392	0.47732
hsa04514	Cell adhesion molecules (CAMs)	126	1.1954	4.1826	0.0068994	0.47732
R-HSA-166016	Toll Like Receptor 4 (TLR4) Cascade	127	1.2049	4.1497	0.0071291	0.47732
R-HSA-111885	Opioid Signalling	81	0.76849	5.205	0.007283	0.47732
WP254	Apoptosis	81	0.76849	5.205	0.007283	0.47732
R-HSA-1433557	Signaling by SCF-KIT	42	0.39847	7.5287	0.0072873	0.47732
R-HSA-112043	PLC beta mediated events	44	0.41745	7.1865	0.008293	0.49574
R-HSA-168249	Innate Immune System	959	9.0985	1.8684	0.0086106	0.49574
R-HSA-164952	The role of Nef in HIV-1 replication and disease pathogenesis	15	0.14231	14.054	0.0086387	0.49574
R-HSA-391903	Eicosanoid ligand-binding receptors	15	0.14231	14.054	0.0086387	0.49574
R-HSA-112040	G-protein mediated events	45	0.42694	7.0268	0.0088249	0.49574
WP2203	Thymic Stromal LymphoPoietin (TSLP) Signaling Pathway	45	0.42694	7.0268	0.0088249	0.49574
hsa04064	NF-kappa B signaling pathway	86	0.81592	4.9024	0.0089678	0.49574
WP69	T-Cell antigen Receptor (TCR) Signaling Pathway	87	0.82541	4.8461	0.0093327	0.49574
hsa04024	cAMP signaling pathway	190	1.8026	3.3285	0.0093714	0.49574
R-HSA-1433559	Regulation of KIT signaling	16	0.1518	13.175	0.0098121	0.49574
R-HSA-389948	PD-1 signaling	16	0.1518	13.175	0.0098121	0.49574
WP47	Hedgehog Signaling Pathway Netpath	16	0.1518	13.175	0.0098121	0.49574
hsa04666	Fc gamma R-mediated phagocytosis	89	0.84439	4.7372	0.010091	0.49574
R-HSA-1474290	Collagen formation	89	0.84439	4.7372	0.010091	0.49574
R-HSA-1483249	Inositol phosphate metabolism	48	0.4554	6.5876	0.010539	0.50864
hsa04713	Circadian entrainment	91	0.86336	4.633	0.010889	0.51647
WP23	B Cell Receptor Signaling Pathway	94	0.89182	4.4852	0.01216	0.56698
R-HSA-500792	GPCR ligand binding	395	3.7476	2.4016	0.012659	0.58043
hsa04934	Cushing syndrome	147	1.3947	3.5851	0.012915	0.58244
WP2849	Hematopoietic Stem Cell Differentiation	53	0.50284	5.9661	0.013796	0.61121
hsa04750	Inflammatory mediator regulation of TRP channels	98	0.92977	4.3021	0.013997	0.61121
WP395	IL-4 Signaling Pathway	54	0.51232	5.8557	0.014509	0.62238
R-HSA-168898	Toll-like Receptor Cascades	152	1.4421	3.4672	0.014746	0.62238
hsa00532	Glycosaminoglycan biosynthesis	20	0.18975	10.54	0.015158	0.62238
R-HSA-2022870	Chondroitin sulfate biosynthesis	20	0.18975	10.54	0.015158	0.62238
hsa04928	Parathyroid hormone synthesis, secretion and action	102	0.96772	4.1334	0.016002	0.64739
R-HSA-389513	CTLA4 inhibitory signaling	21	0.19924	10.038	0.016651	0.65808
WP437	EGF/EGFR Signaling Pathway	157	1.4895	3.3567	0.016745	0.65808
R-HSA-418594	G alpha (i) signalling events	348	3.3016	2.423	0.017537	0.67275
R-HSA-389357	CD28 dependent PI3K/Akt signaling	22	0.20872	9.582	0.018204	0.67275
R-HSA-912631	Regulation of signaling by CBL	22	0.20872	9.582	0.018204	0.67275
WP4585	Cancer immunotherapy by PD-1 blockade	22	0.20872	9.582	0.018204	0.67275
R-HSA-373076	Class A/1 (Rhodopsin-like receptors)	284	2.6944	2.5979	0.018341	0.67275
R-HSA-5260271	Diseases of Immune System	23	0.21821	9.1654	0.019815	0.70795
R-HSA-5602358	Diseases associated with the TLR signaling cascade	23	0.21821	9.1654	0.019815	0.70795
hsa05202	Transcriptional misregulation in cancer	165	1.5654	3.194	0.020305	0.71613
R-HSA-109582	Hemostasis	579	5.4933	2.0025	0.021233	0.72432
WP3851	TLR4 Signaling and Tolerance	24	0.2277	8.7835	0.021485	0.72432
R-HSA-1474244	Extracellular matrix organization	294	2.7893	2.5096	0.02171	0.72432
hsa05217	Basal cell carcinoma	63	0.59771	5.0191	0.021853	0.72432
R-HSA-211897	Cytochrome P450 - arranged by substrate type	63	0.59771	5.0191	0.021853	0.72432
hsa04920	Adipocytokine signaling pathway	64	0.6072	4.9407	0.022773	0.73392
R-HSA-912526	Interleukin receptor SHC signaling	25	0.23719	8.4321	0.02321	0.73392
R-HSA-202433	Generation of second messenger molecules	25	0.23719	8.4321	0.02321	0.73392
WP26	Signal Transduction of S1P Receptor	25	0.23719	8.4321	0.02321	0.73392
hsa04360	Axon guidance	174	1.6508	3.0288	0.024865	0.77247
R-HSA-211976	Endogenous sterols	26	0.24667	8.1078	0.024991	0.77247
R-HSA-418555	G alpha (s) signalling events	175	1.6603	3.0115	0.025409	0.77667
hsa04611	Platelet activation	118	1.1195	3.5729	0.025781	0.77939
R-HSA-202040	G-protein activation	27	0.25616	7.8075	0.026826	0.79352
R-HSA-1855204	Synthesis of IP3 and IP4 in the cytosol	27	0.25616	7.8075	0.026826	0.79352
hsa04662	B cell receptor signaling pathway	69	0.65464	4.5827	0.027687	0.79966
R-HSA-5602571	TRAF3 deficiency - HSE	3	0.028462	35.134	0.028196	0.79966
R-HSA-9020265	Biosynthesis of aspirin-triggered D-series resolvins	3	0.028462	35.134	0.028196	0.79966
R-HSA-5635851	GLI proteins bind promoters of Hh responsive genes to promote transcription	3	0.028462	35.134	0.028196	0.79966
R-HSA-2022854	Keratan sulfate biosynthesis	28	0.26565	7.5287	0.028713	0.80601
R-HSA-2219530	Constitutive Signaling by Aberrant PI3K in Cancer	71	0.67361	4.4536	0.029798	0.82264
hsa04080	Neuroactive ligand-receptor interaction	247	2.3434	2.5604	0.030023	0.82264
