# Supplementary material for: Evolutionary transcriptomics implicates HAND2 in the origins of implantation and regulation of gestation length
Source: eLife. 2021 Feb 1;10:e61257. doi: 10.7554/eLife.61257 (PMC7943190; doi:10.7554/eLife.61257)
Supplement: Figure 1—source data 5. [file elife-61257-fig1-data5.xlsx]

## Sheet: Figure 1—source data 5
Figure 1—source data 5. Top 100 human phenotype (disease) ontology terms in which Eutherian recruited genes are enriched.
Gene Set	Description	Size	Expect	Ratio	P Value	FDR
PA444602	Immune System Diseases	642	5.5884	3.9367	3.152e-08	0.00025238
NHGRI-EBI GWAS Catalog	Preterm Birth	422	0.17496	17.147	0.00040364	0.00080727
PA445355	Pneumonia	95	0.82695	7.2556	0.00017811	0.2604
PA166048849	Pneumonia, Pneumococcal	95	0.82695	7.2556	0.00017811	0.2604
C1840307	Distal shortening of limbs	3	0.026114	76.587	0.00022423	0.2604
C0545053	Advanced bone age	35	0.30467	13.129	0.00023248	0.2604
PA445000	Musculoskeletal Abnormalities	358	3.1163	3.5298	0.00029105	0.2604
PA443533	Bone Diseases, Developmental	104	0.90529	6.6277	0.0002918	0.2604
PA443450	Asthma	246	2.1414	4.2029	0.00029883	0.2604
PA444833	Lymphatic Diseases	364	3.1685	3.4716	0.0003353	0.2604
PA445001	Musculoskeletal Diseases	491	4.274	3.0416	0.00034767	0.2604
PA446883	Epstein-Barr Virus Infections	108	0.94011	6.3822	0.00035774	0.2604
C4021957	Recurrent cutaneous abscess formation	4	0.034819	57.44	0.00044589	0.2744
C0242343	Panhypopituitarism	4	0.034819	57.44	0.00044589	0.2744
PA166048890	Respiratory Hypersensitivity	209	1.8193	4.3973	0.00048296	0.2744
PA443562	Bronchial Diseases	265	2.3068	3.9016	0.00051405	0.2744
PA444546	Hypersensitivity	271	2.359	3.8152	0.00060387	0.3022
C0853697	Neutrophil count decreased	46	0.40042	9.9896	0.00067301	0.31699
PA444761	Leukemia, Myeloid	281	2.446	3.6794	0.00078196	0.34784
PA444750	Leukemia	472	4.1086	2.9207	0.00084389	0.35563
PA134850491	Transplantation	231	2.0108	3.9785	0.00092997	0.37231
C0162835	Hypopigmentation disorder	25	0.21762	13.786	0.0012875	0.43199
PA443949	Dwarfism	93	0.80954	6.1763	0.001301	0.43199
PA444601	Immunologic Deficiency Syndromes	430	3.743	2.9388	0.0013253	0.43199
PA166124223	pneumonitis	94	0.81825	6.1106	0.0013646	0.43199
PA444849	Lymphoproliferative Disorders	369	3.212	3.1133	0.0014358	0.43199
C0018798	Congenital Heart Defects	57	0.49617	8.0618	0.0015135	0.43199
C1840309	Short 4th metacarpal	7	0.060933	32.823	0.0015341	0.43199
PA443567	Bronchiolitis	194	1.6887	4.1452	0.0015364	0.43199
PA444620	Inflammation	513	4.4655	2.6873	0.0017179	0.43199
PA444754	Leukemia, Experimental	99	0.86177	5.802	0.0017179	0.43199
C0026010	Microphthalmos	99	0.86177	5.802	0.0017179	0.43199
PA446165	Leukemia, T-Cell	198	1.7235	4.0614	0.0017265	0.43199
C0239174	Late tooth eruption	60	0.52228	7.6587	0.0018314	0.44435
C0023893	Liver Cirrhosis, Experimental	742	6.4589	2.3224	0.0019724	0.44737
PA165108707	Spina bifida occulta	8	0.069638	28.72	0.0020338	0.44737
C0003868	Arthritis, Gouty	8	0.069638	28.72	0.0020338	0.44737
PA443715	Chondrosarcoma	62	0.53969	7.4116	0.0020673	0.44737
C0027443	Natal Teeth	9	0.078343	25.529	0.0026	0.52056
C1328587	Panhypogammaglobulinemia	9	0.078343	25.529	0.0026	0.52056
PA444848	Lymphopenia	66	0.57451	6.9624	0.0026005	0.52056
C0003873	Rheumatoid Arthritis	161	1.4015	4.2812	0.0028345	0.55356
C0026769	Multiple Sclerosis	34	0.29596	10.136	0.0031642	0.5625
PA446169	Leukemia, Lymphocytic, Chronic, B-Cell	165	1.4363	4.1775	0.0032008	0.5625
C0265535	Trigonocephaly	10	0.087047	22.976	0.0032316	0.5625
C4280665	Wedge shaped head	10	0.087047	22.976	0.0032316	0.5625
C4280666	Triangular head shape	10	0.087047	22.976	0.0032316	0.5625
PA446038	Virus Diseases	484	4.2131	2.6109	0.0033314	0.56754
PA444513	Hypercalcemia	35	0.30467	9.8469	0.0034391	0.57368
PA166175912	immunological response	72	0.62674	6.3822	0.0035667	0.58232
PA444840	Lymphoma	352	3.0641	2.9373	0.0036475	0.58232
C0040588	Tracheoesophageal Fistula	36	0.31337	9.5733	0.0037281	0.58232
PA166048824	Sleep Paralysis	11	0.095752	20.887	0.0039273	0.58232
C0238207	Ectopic kidney	11	0.095752	20.887	0.0039273	0.58232
C0014038	Encephalitis	11	0.095752	20.887	0.0039273	0.58232
PA165108243	X-linked severe combined immunodeficiency	12	0.10446	19.147	0.004686	0.67001
C1319853	Asthma, Aspirin-Induced	12	0.10446	19.147	0.004686	0.67001
PA443655	Cellulitis	14	0.12187	16.411	0.0063879	0.87631
PA446041	Vitamin A Deficiency	14	0.12187	16.411	0.0063879	0.87631
PA443434	Arthritis, Rheumatoid	252	2.1936	3.1911	0.0065134	0.87631
PA166048772	Bone Diseases, Infectious	44	0.38301	7.8327	0.0065752	0.87631
PA446836	Craniofacial Abnormalities	320	2.7855	2.872	0.0068906	0.87631
C0005424	Biliary Tract Diseases	15	0.13057	15.317	0.0073289	0.87631
C0549613	BILIARY TRACT ABNORMALITY	15	0.13057	15.317	0.0073289	0.87631
PA166048810	Respiratory Syncytial Virus Infections	196	1.7061	3.5167	0.007347	0.87631
PA443741	Clubfoot	46	0.40042	7.4922	0.0074421	0.87631
PA446541	Lymphoma, Large-Cell, Anaplastic	46	0.40042	7.4922	0.0074421	0.87631
C1857679	Sloping forehead	46	0.40042	7.4922	0.0074421	0.87631
C0024115	Lung diseases	46	0.40042	7.4922	0.0074421	0.87631
PA150799050	secondary leukemia	90	0.78343	5.1058	0.0078608	0.91219
PA444342	Hamartoma Syndrome, Multiple	16	0.13928	14.36	0.0083284	0.92619
C0020626	Hypoparathyroidism	16	0.13928	14.36	0.0083284	0.92619
C0001768	Agammaglobulinemia	16	0.13928	14.36	0.0083284	0.92619
C4280625	Decreased size of eyeball	96	0.83565	4.7867	0.0098218	0.94572
C4280808	Abnormally small eyeball	96	0.83565	4.7867	0.0098218	0.94572
PA446336	Severe Combined Immunodeficiency	52	0.45265	6.6277	0.010434	0.94572
PA443251	Acrocephalosyndactylia	18	0.15669	12.764	0.010499	0.94572
PA165108995	Mulibrey nanism syndrome	18	0.15669	12.764	0.010499	0.94572
C0158465	Acquired cubitus valgus	18	0.15669	12.764	0.010499	0.94572
PA444395	Hematologic Diseases	347	3.0205	2.6485	0.010937	0.94572
PA443464	Autoimmune Diseases	419	3.6473	2.4676	0.010977	0.94572
PA444485	Hodgkin Disease	154	1.3405	3.7299	0.011138	0.94572
PA443570	Bronchitis	216	1.8802	3.1911	0.011532	0.94572
PA447140	Multicystic Dysplastic Kidney	19	0.16539	12.093	0.011668	0.94572
C0002418	Amblyopia	19	0.16539	12.093	0.011668	0.94572
PA443963	Dysostoses	102	0.88788	4.5051	0.012076	0.94572
PA444756	Leukemia, Lymphoid	286	2.4896	2.8117	0.012547	0.94572
PA165108377	Lymphoid leukemia NOS	286	2.4896	2.8117	0.012547	0.94572
PA444466	Herpes Zoster	20	0.17409	11.488	0.012891	0.94572
PA444825	Lyme Disease	20	0.17409	11.488	0.012891	0.94572
C0426789	Short thorax	20	0.17409	11.488	0.012891	0.94572
PA443250	Acquired Immunodeficiency Syndrome	104	0.90529	4.4185	0.012895	0.94572
PA447230	HIV	745	6.485	2.0046	0.012908	0.94572
PA444972	Mouth Neoplasms	160	1.3928	3.59	0.012976	0.94572
C0015695	Fatty Liver	57	0.49617	6.0463	0.013388	0.94572
PA444614	Infection	510	4.4394	2.2525	0.013587	0.94572
PA445016	Myeloproliferative Disorders	106	0.9227	4.3351	0.013749	0.94572
PA445253	Paresthesia	21	0.1828	10.941	0.014168	0.94572
C0029882	Otitis Media	21	0.1828	10.941	0.014168	0.94572
C0020305	Hydrops Fetalis	21	0.1828	10.941	0.014168	0.94572
