# Supplementary material for: Evolutionary transcriptomics implicates HAND2 in the origins of implantation and regulation of gestation length
Source: eLife. 2021 Feb 1;10:e61257. doi: 10.7554/eLife.61257 (PMC7943190; doi:10.7554/eLife.61257)
Supplement: Figure 1—source data 6. [file elife-61257-fig1-data6.xlsx]

## Sheet: Figure 1—source data 6
Figure 1—source data 6. Top 100 biological process gene ontology (GO) terms in which Eutherian recruited genes are enriched.
Gene Set	Description	Size	Expect	Ratio	P Value	FDR
GO:0050900	leukocyte migration	394	3.6068	4.7134	1.1742e-07	0.0012869
GO:0002429	immune response-activating cell surface receptor signaling pathway	276	2.5266	5.5411	2.3731e-07	0.0013005
GO:0002768	immune response-regulating cell surface receptor signaling pathway	304	2.7829	5.0307	7.6216e-07	0.0022103
GO:0006954	inflammatory response	673	6.1608	3.4087	8.0668e-07	0.0022103
GO:0016477	cell migration	1303	11.928	2.4313	5.5523e-06	0.0080388
GO:0006935	chemotaxis	583	5.3369	3.3727	6.1794e-06	0.0080388
GO:0050778	positive regulation of immune response	644	5.8953	3.2229	6.4112e-06	0.0080388
GO:0042330	taxis	585	5.3552	3.3612	6.4774e-06	0.0080388
GO:0002757	immune response-activating signal transduction	420	3.8448	3.9014	7.0387e-06	0.0080388
GO:0002684	positive regulation of immune system process	904	8.2754	2.7793	7.3347e-06	0.0080388
GO:0001816	cytokine production	664	6.0784	3.1258	9.9027e-06	0.0098666
GO:0006952	defense response	1355	12.404	2.338	1.1811e-05	0.010653
GO:0048870	cell motility	1440	13.182	2.2758	1.3664e-05	0.010653
GO:0051674	localization of cell	1440	13.182	2.2758	1.3664e-05	0.010653
GO:0045621	positive regulation of lymphocyte differentiation	87	0.79642	8.7894	1.4685e-05	0.010653
GO:0002764	immune response-regulating signaling pathway	449	4.1102	3.6494	1.5552e-05	0.010653
GO:0034097	response to cytokine	1023	9.3648	2.5628	1.7553e-05	0.011317
GO:0019221	cytokine-mediated signaling pathway	640	5.8587	3.0724	2.1821e-05	0.012976
GO:0050776	regulation of immune response	834	7.6346	2.7506	2.2495e-05	0.012976
GO:0050851	antigen receptor-mediated signaling pathway	169	1.5471	5.8175	2.515e-05	0.013782
GO:0040011	locomotion	1648	15.086	2.1211	2.7462e-05	0.014332
GO:0030098	lymphocyte differentiation	313	2.8653	4.1881	3.0648e-05	0.015268
GO:0006955	immune response	1743	15.956	2.0682	3.3247e-05	0.015843
GO:0002682	regulation of immune system process	1297	11.873	2.2741	4.0912e-05	0.018683
GO:0002253	activation of immune response	493	4.513	3.3237	4.5873e-05	0.020111
GO:0002696	positive regulation of leukocyte activation	279	2.554	4.3069	5.1588e-05	0.021746
GO:0006928	movement of cell or subcellular component	1870	17.118	1.9862	5.6086e-05	0.022767
GO:0002520	immune system development	823	7.5339	2.6547	5.9218e-05	0.02318
GO:0050867	positive regulation of cell activation	290	2.6547	4.1436	7.3044e-05	0.026443
GO:1903039	positive regulation of leukocyte cell-cell adhesion	194	1.7759	5.0678	7.3877e-05	0.026443
GO:0051251	positive regulation of lymphocyte activation	241	2.2062	4.5327	7.4792e-05	0.026443
GO:0045619	regulation of lymphocyte differentiation	152	1.3914	5.7494	7.7972e-05	0.02655
GO:0030595	leukocyte chemotaxis	196	1.7942	5.0161	7.994e-05	0.02655
GO:0002521	leukocyte differentiation	461	4.2201	3.3175	8.4955e-05	0.02722
GO:0007159	leukocyte cell-cell adhesion	296	2.7097	4.0596	8.7687e-05	0.02722
GO:0048534	hematopoietic or lymphoid organ development	780	7.1403	2.661	8.9408e-05	0.02722
GO:0001817	regulation of cytokine production	596	5.4559	2.9326	0.00011136	0.032987
GO:0097530	granulocyte migration	122	1.1168	6.2678	0.0001291	0.03647
GO:0071345	cellular response to cytokine stimulus	942	8.6233	2.4353	0.00012977	0.03647
GO:0030097	hemopoiesis	740	6.7741	2.6572	0.00014165	0.038811
GO:0051250	negative regulation of lymphocyte activation	125	1.1443	6.1174	0.00015024	0.040161
GO:1903037	regulation of leukocyte cell-cell adhesion	264	2.4167	4.1378	0.00015842	0.04134
GO:0051249	regulation of lymphocyte activation	374	3.4237	3.505	0.00016747	0.042105
GO:0060326	cell chemotaxis	267	2.4442	4.0914	0.00017365	0.042105
GO:0050852	T cell receptor signaling pathway	128	1.1717	5.974	0.00017409	0.042105
GO:1903708	positive regulation of hemopoiesis	171	1.5654	5.1106	0.00017672	0.042105
GO:0030217	T cell differentiation	219	2.0048	4.4893	0.00018547	0.043249
GO:0070234	positive regulation of T cell apoptotic process	13	0.119	25.209	0.00020072	0.044897
GO:0002693	positive regulation of cellular extravasation	13	0.119	25.209	0.00020072	0.044897
GO:0002694	regulation of leukocyte activation	447	4.0919	3.177	0.00023468	0.050354
GO:1902107	positive regulation of leukocyte differentiation	135	1.2358	5.6643	0.00024181	0.050354
GO:1904475	regulation of Ras GTPase binding	3	0.027463	72.826	0.00024809	0.050354
GO:2001106	regulation of Rho guanyl-nucleotide exchange factor activity	3	0.027463	72.826	0.00024809	0.050354
GO:0043585	nose morphogenesis	3	0.027463	72.826	0.00024809	0.050354
GO:0050863	regulation of T cell activation	281	2.5723	3.8875	0.00026208	0.051973
GO:0022409	positive regulation of cell-cell adhesion	230	2.1055	4.2746	0.00026706	0.051973
GO:0050870	positive regulation of T cell activation	182	1.6661	4.8017	0.0002703	0.051973
GO:0010517	regulation of phospholipase activity	64	0.58587	8.5343	0.00029549	0.055837
GO:1990266	neutrophil migration	100	0.91542	6.5543	0.00031081	0.057736
GO:0043647	inositol phosphate metabolic process	65	0.59502	8.403	0.00031778	0.058048
GO:0046649	lymphocyte activation	595	5.4468	2.7539	0.00036158	0.064965
GO:0070227	lymphocyte apoptotic process	68	0.62249	8.0323	0.00039235	0.069357
GO:0002695	negative regulation of leukocyte activation	148	1.3548	5.1667	0.00042308	0.072682
GO:1902105	regulation of leukocyte differentiation	245	2.2428	4.0129	0.00042442	0.072682
GO:0022407	regulation of cell-cell adhesion	356	3.2589	3.3754	0.00043329	0.07306
GO:0071621	granulocyte chemotaxis	107	0.9795	6.1256	0.00044725	0.074271
GO:0070242	thymocyte apoptotic process	17	0.15562	19.277	0.00046461	0.074492
GO:0070230	positive regulation of lymphocyte apoptotic process	17	0.15562	19.277	0.00046461	0.074492
GO:0050865	regulation of cell activation	481	4.4032	2.9524	0.00047323	0.074492
GO:0010863	positive regulation of phospholipase C activity	40	0.36617	10.924	0.00047577	0.074492
GO:2000391	positive regulation of neutrophil extravasation	4	0.036617	54.62	0.0004932	0.076134
GO:1900274	regulation of phospholipase C activity	43	0.39363	10.162	0.00062898	0.095744
GO:0043586	tongue development	19	0.17393	17.248	0.00065325	0.097147
GO:0045582	positive regulation of T cell differentiation	76	0.69572	7.1868	0.00065592	0.097147
GO:0009968	negative regulation of signal transduction	1147	10.5	2.0953	0.00072058	0.1053
GO:0035239	tube morphogenesis	780	7.1403	2.3809	0.00077165	0.11128
GO:0070245	positive regulation of thymocyte apoptotic process	5	0.045771	43.696	0.00081707	0.11194
GO:2000389	regulation of neutrophil extravasation	5	0.045771	43.696	0.00081707	0.11194
GO:0060374	mast cell differentiation	5	0.045771	43.696	0.00081707	0.11194
GO:2000664	positive regulation of interleukin-5 secretion	5	0.045771	43.696	0.00081707	0.11194
GO:0070231	T cell apoptotic process	47	0.43025	9.2969	0.00088374	0.11958
GO:0050866	negative regulation of cell activation	168	1.5379	4.5516	0.000899	0.12016
GO:0045580	regulation of T cell differentiation	123	1.126	5.3287	0.00093357	0.12328
GO:0038093	Fc receptor signaling pathway	124	1.1351	5.2858	0.00097377	0.12705
GO:0046634	regulation of alpha-beta T cell activation	84	0.76896	6.5023	0.001034	0.13297
GO:0048646	anatomical structure formation involved in morphogenesis	1025	9.3831	2.1315	0.0010434	0.13297
GO:0051094	positive regulation of developmental process	1268	11.608	1.9815	0.0011532	0.14055
GO:0030318	melanocyte differentiation	23	0.21055	14.249	0.0011624	0.14055
GO:0031295	T cell costimulation	51	0.46687	8.5678	0.0012037	0.14055
GO:0060191	regulation of lipase activity	87	0.79642	6.2781	0.0012108	0.14055
GO:0042421	norepinephrine biosynthetic process	6	0.054925	36.413	0.0012182	0.14055
GO:0072603	interleukin-5 secretion	6	0.054925	36.413	0.0012182	0.14055
GO:2000662	regulation of interleukin-5 secretion	6	0.054925	36.413	0.0012182	0.14055
GO:2000667	positive regulation of interleukin-13 secretion	6	0.054925	36.413	0.0012182	0.14055
GO:0008063	Toll signaling pathway	6	0.054925	36.413	0.0012182	0.14055
GO:0030593	neutrophil chemotaxis	88	0.80557	6.2068	0.0012744	0.14481
GO:0070228	regulation of lymphocyte apoptotic process	52	0.47602	8.403	0.0012948	0.14481
GO:0031294	lymphocyte costimulation	52	0.47602	8.403	0.0012948	0.14481
GO:0002691	regulation of cellular extravasation	24	0.2197	13.655	0.0013196	0.14609
GO:0097529	myeloid leukocyte migration	180	1.6478	4.2482	0.0013426	0.14715
