# Supplementary material for: Evolutionary transcriptomics implicates HAND2 in the origins of implantation and regulation of gestation length
Source: eLife. 2021 Feb 1;10:e61257. doi: 10.7554/eLife.61257 (PMC7943190; doi:10.7554/eLife.61257)
Supplement: Figure 1—source data 7. — Gene expression in TPM. NP = non-pregnant; d7, d12.5, d13, d13.5–14.5 = day 7, 12.5, 13, 13.5–14.5 of pregnancy, respectively; N2_9mo, N3_10mo = non-pregnant endometrium 9 and 10 months after pregnancy, respectively. [file elife-61257-fig1-data7.xlsx]

## Sheet: Figure 1—source data 7
Figure 1—source data 7. RNA-Seq data from opossum endometrial samples. Gene expression in TPM. NP = non-pregnant; d7, d12.5, d13, d13.5-14.5 = day 7, 12.5, 13, 13.5-14.5 of pregnancy, respectively; N2_9mo, N3_10mo = non-pregnant endometrium 9 and 10 months after pregnancy, respectively.
Transcript stable ID version	Gene stable ID	Gene name	NP_02	NP_03	d7_01	d7_02	d12.5	d13_01	d13_02	d13.5-14.5_01	d13.5-14.5_02	d13.5-14.5_03	N2_9mo	N3_10mo	HUGO	NP	d7	d12.5	d13	d13.5-14.5	NP
ENSMODT00000020875.4	ENSMODG00000016421	DKK1	1.83336	2.41898	0.0549222	0	0.121815	0.653617	0.129134	0.681179	1.23845	0.91253	0.429194	0.258485	DKK1	1.45814	0.165714	0.34902	0.6256	0.971624	0.586378
ENSMODT00000021240.4	ENSMODG00000016719	ESR1	265.41	351.509	243.03	170.924	200.654	7.88822	18.0998	39.5566	35.8105	15.7156	299.678	226.35	ESR1	17.563	14.3867	14.1652	3.60472	5.51007	16.2177
ENSMODT00000043324.2	ENSMODG00000029105	FGF1	6.47086	5.65959	0.633671	0.130277	1.0971	10.6789	0.666043	14.3134	12.786	27.9252	11.819	12.4769	FGF1	2.46277	0.61804	1.04743	2.3817	4.2827	3.48539
ENSMODT00000053703.1	ENSMODG00000042284	FGF18	4.81914	7.97187	4.15488	1.3744	0	9.27791	4.25364	0	0	0	0	0	FGF18	2.52893	1.66272	0	2.60111	0	0
ENSMODT00000023996.4	ENSMODG00000018899	FGF2	6.00937	4.92172	0.90894	1.10128	1.73447	2.00356	1.33657	1.58179	1.96257	2.39499	4.46075	5.21232	FGF2	2.33785	1.00255	1.31699	1.29231	1.40705	2.19921
ENSMODT00000086791.1	ENSMODG00000051310	FGF9	30.5114	29.2031	0.905258	0.180954	8.36342	29.6236	33.8654	71.4045	53.9107	47.5343	8.2803	14.4588	FGF9	5.46418	0.736957	2.89196	5.63423	7.59055	3.37188
ENSMODT00000062925.1	ENSMODG00000041860	HAND2	46.5571	38.3845	3.97762	5.45333	1.11737	1.57021	1.37732	6.04655	4.65712	3.30049	27.7103	24.7835	HAND2	6.51696	2.17151	1.05706	1.21399	2.16057	5.12317
ENSMODT00000070726.1	ENSMODG00000041399	IL15	1.68913	4.08426	3.28636	3.03292	0	2.94686	0.325445	1.73113	3.69422	5.0525	0.697285	0.128141	IL15	1.69903	1.77754	0	1.27912	1.86885	0.642427
ENSMODT00000011746.3	ENSMODG00000009230	LIF	2.26087	2.29525	0.287846	0.106605	0.16726	0.674319	0.24334	0.724455	2.04172	4.55972	4.52706	5.17916	LIF	1.50932	0.444101	0.408974	0.67737	1.56268	2.20298
ENSMODT00000008793.4	ENSMODG00000006953	MKI67	2.72031	11.0948	2.03604	0.88049	0.627602	1.26231	1.11493	0.736507	0.820869	0.935339	29.636	46.5073	MKI67	2.62822	1.20759	0.792213	1.09024	0.91154	6.17022
ENSMODT00000086161.1	ENSMODG00000012819	NR2F2	64.0998	87.3398	15.2705	14.8021	11.4604	21.9742	12.0938	36.4751	23.2362	14.7915	91.0162	101.735	NR2F2	8.70171	3.87767	3.38532	4.12723	4.9834	9.81711
ENSMODT00000000624.4	ENSMODG00000000509	PGR	235.938	264.267	61.7948	37.4047	15.2715	19.4515	21.8901	30.1173	33.6964	17.7584	225.745	270.697	PGR	15.8146	7.04271	3.90788	4.54652	5.21447	15.755
ENSMODT00000006987.4	ENSMODG00000005538	WNT11	32.6018	41.0678	1.97038	1.60664	22.3448	97.6282	87.4083	117.06	107.466	192.782	17.251	15.1898	WNT11	6.06917	1.33735	4.72703	9.61864	11.7942	4.02746
ENSMODT00000088270.1	ENSMODG00000044786	WNT4	16.3192	15.4362	5.56778	1.73641	6.07472	17.9288	10.2613	22.3217	5.71748	7.79188	4.0745	5.93804	WNT4	3.98468	1.91105	2.46469	3.75434	3.45596	2.23747
ENSMODT00000063525.1	ENSMODG00000037562	WNT5B	7.33098	6.75121	9.08861	6.76659	0.374606	1.0727	0.571946	1.96059	3.31322	4.79415	12.5417	16.5462	WNT5B	2.65351	2.8156	0.612051	0.90682	1.83194	3.81365
ENSMODT00000000001.3	ENSMODG00000000002		0.495874	0.331408	0.175481	0.940455	0.957574	0.176674	0	0.412954	0.236195	0.396965	1.08331	0.582819
ENSMODT00000000005.4	ENSMODG00000000005		6.8945	7.44475	20.7688	2.9704	3.49943	2.64869	0.967072	4.3547	3.95786	7.03432	10.8457	10.0412
ENSMODT00000000006.3	ENSMODG00000005392	SNRPB2	35.8536	42.2643	31.7713	41.3277	8.86665	30.7314	22.1698	28.5678	42.3586	38.5797	42.6707	42.7396
ENSMODT00000000007.3	ENSMODG00000000006	INAVA	8.09499	8.58016	1.2301	0.683902	4.09206	11.502	6.74387	16.1901	10.5224	13.0575	7.21967	5.1893
ENSMODT00000000008.3	ENSMODG00000024179		2.44444	4.10833	4.44524	10.4861	1.3229	5.66938	4.75119	0.403385	0.749827	1.81296	1.47738	1.57358
ENSMODT00000000009.4	ENSMODG00000000011		0.292497	0.476481	0.199455	0.100276	0	0.214697	0.0148076	1.29099	0.478422	0.409425	0.719404	0.698206
ENSMODT00000000010.4	ENSMODG00000000013		0.620198	0.486319	0.358854	0.164975	1.58738	0.196467	0.216481	0.872563	0.847824	0.84965	3.41401	3.61504
ENSMODT00000000015.4	ENSMODG00000023467		9.09669	10.5038	5.94667	4.45392	4.96235	16.2312	7.81827	22.1997	17.6273	20.6325	13.3946	11.7174
ENSMODT00000000016.3	ENSMODG00000000016		0	0	0	0	0	0	0	0	0	0	0	0
ENSMODT00000000017.3	ENSMODG00000000015		0.0342228	0.207724	1.07444	0.10934	0	0.180254	0.0457853	0.302708	0	0.26492	0.251749	0
ENSMODT00000000018.4	ENSMODG00000000018		0	0	0	0	0	0	0	0	0	0	0	0
ENSMODT00000000019.2	ENSMODG00000000021		0.339544	0.163924	0.563025	1.71536	0	0	0.430229	0.751246	0.56901	0.496138	0	0.767133
ENSMODT00000000021.2	ENSMODG00000000023		0.1544	0.245442	0.120488	0	0	0	0.152231	0.485765	0.362478	0.474459	1.66197	2.14255
ENSMODT00000000025.1	ENSMODG00000000019		0	0.0339634	0	0	0	0	0	0	0	0	0	0
ENSMODT00000000027.3	ENSMODG00000000031	ANAPC16	140.453	188.513	165.668	142.549	77.4683	81.946	65.7918	85.3923	112.691	124.659	157.357	136.797
ENSMODT00000000028.3	ENSMODG00000000033	ARC	0.145238	0.0689326	0	0	0	0.0359068	0.0454798	0	0.067471	0.224347	0.10106	0.113717
ENSMODT00000000031.4	ENSMODG00000000022		6.31206	7.48996	3.50937	0.880385	14.7563	3.86533	3.94808	11.0749	14.4428	8.26249	17.4225	16.1063
ENSMODT00000000033.4	ENSMODG00000024790	PCDH7	0	0.33564	0.157684	0	0.970156	0.326388	0	0.267246	0.330695	0.796025	3.98856	3.37975
ENSMODT00000000034.3	ENSMODG00000000035	DDIT4	26.1898	24.7873	101.199	193.08	21.4804	42.4077	30.0394	67.6799	113.274	91.268	81.8609	65.4401
ENSMODT00000000035.4	ENSMODG00000007456		0.9662	0.368372	2.10413	3.35575	2.6443	0.832411	3.52907	2.14456	3.46902	1.9237	2.26255	2.15353
ENSMODT00000000036.4	ENSMODG00000000038		0.157795	0.0750073	0	0	0	0	0	0	0	0	0	0.101425
ENSMODT00000000037.4	ENSMODG00000000036	ARSH	0.448318	0.35709	0.0889098	0.212077	0.0862152	1.40289	0.359802	1.09011	1.37455	1.22696	0.331219	0.630037
ENSMODT00000000038.4	ENSMODG00000000032	BMPER	0.479383	0.215754	0.0553397	0.0343734	0	0.41369	0.0881527	0.189001	0.0715898	0	1.40902	0.193917
ENSMODT00000000039.3	ENSMODG00000000040	PCDH18	6.15106	6.72403	1.15375	0.100931	0.66935	0.483979	0.0368324	0.447084	0.331118	0.20311	38.461	23.5134
ENSMODT00000000040.3	ENSMODG00000000042	THEM6	1.84625	1.72999	0.538469	0.610294	1.04736	1.29659	0.311004	1.9249	1.93488	1.12957	2.5178	3.83578
ENSMODT00000000042.4	ENSMODG00000000026	CLCA2	0.216198	0.126363	0.0140646	0.0140084	0	0.105048	0.347108	0.189	0.857992	0.858279	0.835291	0.433694
ENSMODT00000000050.4	ENSMODG00000000048		0	0	0	0	0	0	0	0	0	0	0	0
ENSMODT00000000051.4	ENSMODG00000000049	ARSD	7.5361	10.229	24.51	11.4136	5.60148	2.94251	3.81627	7.35408	8.42352	7.05327	16.2042	26.4883
ENSMODT00000000053.4	ENSMODG00000000053		0.0861886	0.0564415	0.711758	0	0	0	0.0374534	0.0997027	0.0566693	0.286269	0.427828	0.0961178
ENSMODT00000000054.2	ENSMODG00000000050	BPIFB3	0.0641548	0	0	0	0	0.0643714	0	0	0.123416	0.360237	0	0
ENSMODT00000000057.4	ENSMODG00000000052	MGA	5.47886	5.84334	1.88077	0.0314106	0.629755	0.404546	8.00289e-05	0.842607	5.78877	3.92121	10.5791	12.0491
ENSMODT00000000059.4	ENSMODG00000000057	BPIFB4	0	0	0	0	0	0.0598261	0	0.211171	0.44144	0.605943	0	0.10151
ENSMODT00000000060.3	ENSMODG00000000058	NPSR1	0	0	0	0	0	0	0	0.134153	0	0	0.114921	0
ENSMODT00000000064.4	ENSMODG00000000060	GYG2	0.184625	0.243138	0	0	0	1.26778	0.292024	0.504748	0.163836	0.481427	0.3404	1.42224
ENSMODT00000000065.4	ENSMODG00000000056		12.0181	13.8966	12.7466	9.63865	3.40724	2.54661	2.71972	9.44863	22.6595	7.38696	39.973	36.6163
ENSMODT00000000073.4	ENSMODG00000000065	DPY19L1	9.38583	8.8313	2.24358	0.369482	1.04278	6.0641	1.14615	7.39912	5.88008	4.85726	11.3108	9.84563
ENSMODT00000000081.4	ENSMODG00000000067	MICU1	49.8616	59.1319	81.3493	83.6384	63.9721	47.4631	85.6655	47.9166	64.7923	56.3931	76.5432	65.9281
ENSMODT00000000083.2	ENSMODG00000000077		4.19405	9.43183	10.7702	5.79968	26.4579	2.08772	5.64662	39.3428	45.2284	45.8047	42.1424	36.0457
ENSMODT00000000089.4	ENSMODG00000000082	AKAP17A	8.98464	11.3019	9.83479	3.59298	9.36734	6.75529	6.53899	22.1082	27.6132	14.0177	21.5447	19.1507
ENSMODT00000000090.4	ENSMODG00000000083	STIM2	32.9807	37.3805	28.7228	20.119	17.0963	18.0121	15.8481	30.999	34.0739	30.5268	32.4348	38.7052
ENSMODT00000000091.2	ENSMODG00000000084		0	0	0	0	0	0	0	0	0	0	0	0.206812
ENSMODT00000000093.3	ENSMODG00000000086	P2RY8	1.70514	0.946107	0.0453371	0	0	0.428262	0.0543103	1.22427	0.231539	0.51716	4.42439	0.976409
ENSMODT00000000094.4	ENSMODG00000000085	TBX20	0.0446158	0.0214943	0.0241166	0	1.25656	8.10153	0.256229	7.82131	6.40442	13.5227	0.0663293	0.260227
ENSMODT00000000095.4	ENSMODG00000000087	NOCT	9.33468	6.98397	7.80277	4.35097	6.28196	19.5256	7.58461	14.9669	10.9489	14.7766	27.3863	45.3073
ENSMODT00000000097.4	ENSMODG00000000088	MCU	1.08991	0.749576	2.83524	1.68248	0	0.63728	0.996444	0.512241	1.1826	0.111997	0.43626	1.22002
ENSMODT00000000102.3	ENSMODG00000000089	ELF2	18.0483	16.9934	9.97707	2.99694	13.6997	5.99571	4.60164	17.1073	17.7403	16.8652	25.5619	37.9118
ENSMODT00000000103.3	ENSMODG00000000090	ASMTL	18.2295	23.0514	13.8613	8.91316	12.8922	28.2588	8.47388	25.5392	25.8372	30.6093	26.0923	30.6641
ENSMODT00000000105.3	ENSMODG00000000098	NDUFC1	151.263	162.012	256.982	360.872	103.104	233.868	217.35	144.138	163.744	167.192	125.03	121.08
ENSMODT00000000106.3	ENSMODG00000000095	OIT3	0	0	0	0	0	0	0	0.300237	0	0	0	0
ENSMODT00000000107.4	ENSMODG00000000094	APPL1	26.3113	25.0429	27.5577	11.6778	34.118	11.9737	13.4723	26.6331	28.9387	23.0516	38.9415	40.4353
ENSMODT00000000109.5	ENSMODG00000000097	CCDC82	5.92031	5.07165	1.93854	0.220696	1.28394	2.35412	1.01957	4.32301	6.19382	7.74522	18.0558	19.1156
ENSMODT00000000110.2	ENSMODG00000000101		40.1353	45.7776	92.1882	339.967	46.0346	828.339	216.397	141.721	441.31	254.543	248.261	2.20681
ENSMODT00000000112.4	ENSMODG00000000102	PLA2G12B	0	0	0.12417	0.315258	5.27341	33.4971	4.87787	15.3988	13.0111	16.1368	0	0.192556
ENSMODT00000000117.3	ENSMODG00000000092	TYRO3	6.54279	4.38686	0.394179	0.237066	12.4583	3.18212	3.76216	4.86146	4.28586	5.72694	14.8973	16.0996
ENSMODT00000000118.4	ENSMODG00000000105	ASB14	0.37325	0.197567	0.0905923	0.0399861	0	0.0825645	0.159015	0.197462	0.450227	0.24583	0.338565	0.69229
ENSMODT00000000120.3	ENSMODG00000000099	CNTNAP5	0	0.0464739	0.119638	0.0402364	0	0.0506339	0	0	0.0517781	0	0.411927	0
ENSMODT00000000121.4	ENSMODG00000000109	TBC1D19	0	0.568466	0.634958	0	0	0.571768	0	1.31613	0	1.4922	0.945064	0.945192
ENSMODT00000000124.4	ENSMODG00000000111	RPAP1	9.45209	9.30401	7.13752	3.38414	9.15224	6.94895	5.67863	8.89725	11.1086	9.64587	11.1419	12.3602
ENSMODT00000000125.4	ENSMODG00000000113	CCKAR	0.0159234	0.0314725	0	0	0	0.0491892	0	0.113959	0	0	18.3222	43.5549
ENSMODT00000000126.4	ENSMODG00000000115		0	0	0	1.65275	0.271442	1.53891	2.33623	4.36301	0.000487312	0.465685	0	3.48466
ENSMODT00000000132.3	ENSMODG00000000117	LTK	0.0789729	0	0	0	0	0.048197	0	0	0	0.298235	0.0801663	0.895587
ENSMODT00000000134.3	ENSMODG00000000120		0.206454	0.0645535	0.0364112	0	0	0	0	0.226592	0.387595	0	0.337017	0.754414
ENSMODT00000000137.4	ENSMODG00000000116	MTMR2	0	0	0	0	0	0	0	0	0	0	0	0
ENSMODT00000000138.4	ENSMODG00000000124	KLHL1	0.114294	0.0936469	0.062135	0.0205587	0	0.0580473	0.048932	0	0	0.0641724	0	0.0323602
ENSMODT00000000140.4	ENSMODG00000000126	ITPKA	0.596542	0.35073	0.0322093	0.0279618	0.137028	1.0248	0	0.680226	0.45153	0.413257	1.42039	1.32591
ENSMODT00000000141.4	ENSMODG00000000122	SETD7	0.958265	1.70433	1.45125	0	2.3595	1.45657	0.336013	5.37346	4.62381	8.05686	7.31189	8.05143
ENSMODT00000000142.4	ENSMODG00000000127	SHOX	0	0	0	0	0	0	0	0	0	0	0.0909006	0.101861
ENSMODT00000000146.4	ENSMODG00000000121	P4HA1	53.8534	50.0395	48.0048	27.8117	69.6104	44.0042	29.1383	89.3477	185.702	116.102	96.4765	77.1349
ENSMODT00000000147.3	ENSMODG00000000130	LFNG	7.28761	7.01759	2.24546	0.470037	1.97569	4.95181	1.51578	8.67672	48.1433	33.1087	10.3979	11.2391
ENSMODT00000000148.4	ENSMODG00000000131	CEP57	10.2799	7.38756	1.96438	4.20895	8.30161	4.04174	2.35971	13.1596	15.3707	12.3916	40.8799	34.271
ENSMODT00000000150.4	ENSMODG00000000129	RBPJ	0.604575	0	6.54701	2.84027	0.0182441	1.24758	0	2.6016	2.53631e-06	0.867734	1.10516e-08	1.19504e-06
ENSMODT00000000157.3	ENSMODG00000000134		2.44529	3.08552	0.366159	0.357565	0	0.393377	0.941637	0.934916	1.69934	0.889271	3.37359	2.74495
ENSMODT00000000158.4	ENSMODG00000000135	RTF1	54.6068	60.9694	30.5056	31.076	36.6993	49.7013	47.6587	64.2312	53.5264	42.379	55.8946	60.3721
ENSMODT00000000160.4	ENSMODG00000000137	SMIM20	149.11	147.261	94.6352	111.026	41.5582	79.5836	96.7709	55.0563	64.2332	80.1464	45.5785	70.6821
ENSMODT00000000164.4	ENSMODG00000000141	NDUFAF1	0.875339	4.10927	2.29837	1.79014	20.9696	2.69142	1.30567	4.38863	14.8972	2.93697	2.90711	7.8337
ENSMODT00000000167.4	ENSMODG00000000142	NUDT13	15.3702	14.7812	18.401	10.5171	27.223	16.1768	13.5415	21.3685	26.2985	17.9506	9.51924	11.5409
ENSMODT00000000171.4	ENSMODG00000000145	TTYH3	2.70363	3.97358	8.38778	0.16935	6.34574	1.64943	0.898903	2.51941	6.76482	5.98962	2.79426	6.13147
ENSMODT00000000172.3	ENSMODG00000000147		56.6968	78.7641	41.8547	38.0568	13.4719	24.3156	22.3854	38.652	57.3675	51.7723	107.707	82.6077
ENSMODT00000000174.4	ENSMODG00000000148		0.0339428	0.0343502	0	0.0812562	0	0.312065	0.16083	1.11053	1.19677	0.798532	0.737379	0.991891
ENSMODT00000000175.4	ENSMODG00000024484		3.32085	1.63185	0.202761	0.0278422	0.493633	0.130433	0	0	0.498991	0.438226	4.69591	5.99739
ENSMODT00000000176.4	ENSMODG00000000149	ECD	60.06	58.1096	50.1789	43.4074	63.2029	52.5107	44.9623	73.4764	79.963	66.9623	79.831	86.1757
ENSMODT00000000178.4	ENSMODG00000000151		13.8714	21.4642	18.3161	5.97214	9.76486	6.15508	6.24835	15.0127	13.7757	10.0967	40.3271	48.7007
ENSMODT00000000179.4	ENSMODG00000000152		61.8362	73.2922	47.3518	60.6704	26.3769	24.6378	26.3077	53.6134	100.32	73.2984	149.36	146.002
ENSMODT00000000182.4	ENSMODG00000000154	SEL1L3	16.9951	18.5764	6.8784	1.00179e-08	11.837	5.04852	6.62501	13.7321	23.0255	21.6497	26.3278	33.3667
ENSMODT00000000184.4	ENSMODG00000000157	ZNF18	9.04925	6.68934	9.42941	2.26567	2.76828	1.45627	1.47387	4.61655	6.25442	6.71041	22.0905	26.0008
ENSMODT00000000186.4	ENSMODG00000000158	CHP1	91.0274	93.0202	160.261	94.9291	187.959	196.921	123.086	175.477	181.654	201.823	91.7242	88.8201
ENSMODT00000000189.4	ENSMODG00000000161	FAM149B1	1.60652	0.479517	1.85422	0	2.89203	0	0	0.286869	2.09921e-08	2.98158e-05	0.415465	1.81065
ENSMODT00000000190.4	ENSMODG00000000160	CLGN	0.22944	0.299214	0.166161	0	0	1.20668	0.027847	2.37821	3.18921	6.53574	1.00939	1.73335
ENSMODT00000000191.4	ENSMODG00000000163	SESN3	11.0162	13.5088	17.4858	1.79898	9.5087	7.67671	3.10459	21.9264	31.6521	39.135	27.6802	63.7745
ENSMODT00000000192.4	ENSMODG00000000162		0	0.192809	0	0	0	0	0	0	1.06457	0	1.56967	0.53026
ENSMODT00000000195.4	ENSMODG00000000164	EXD1	5.71915	5.41125	1.38227	0	0	1.43677	2.22055	7.96262	22.1741	6.22435	19.1269	18.1639
ENSMODT00000000196.3	ENSMODG00000000165	ENDOD1	4.12944	3.59489	2.13717	0.17038	1.94465	1.80238	1.5141	5.49798	5.07276	4.51523	19.8847	20.1601
ENSMODT00000000197.3	ENSMODG00000000167	DNAJC9	39.6806	68.0482	17.1026	13.3772	19.7644	23.1703	30.2832	29.6856	39.6257	24.9447	94.6284	78.6413
ENSMODT00000000198.2	ENSMODG00000000168	MRPS16	66.5308	62.4151	98.6881	213.997	44.6547	79.6607	138.291	40.9382	54.0805	63.223	32.66	35.843
ENSMODT00000000199.3	ENSMODG00000000169		85.2276	105.015	103.517	133.502	61.9899	76.5488	86.8763	115.451	125.224	124.536	129.939	131.903
ENSMODT00000000201.2	ENSMODG00000000172	UCP1	0.0678975	0.097436	0.0727554	0	0.18014	0	0	0.115034	0	0	0.591987	0.276974
ENSMODT00000000203.5	ENSMODG00000000173	DACH1	5.0194	4.51247	2.70852	0.602764	7.39798	0.6966	0	1.14788	0	2.16512	3.42556	1.76228
ENSMODT00000000205.3	ENSMODG00000000174	ASCL5	0.17244	0.164409	0	0	0	0.0866544	0	0	0	0	0.199721	0.112587
ENSMODT00000000206.4	ENSMODG00000000175	CDK5RAP1	10.1835	10.7494	11.7384	5.52131	2.62782	2.81653	3.00298	8.54055	15.7059	10.5349	24.6509	20.032
ENSMODT00000000208.3	ENSMODG00000000176	BRAT1	23.9976	26.2747	11.3273	7.55216	13.0125	8.24526	10.4842	24.0318	37.5987	23.5161	39.3884	46.1883
ENSMODT00000000210.2	ENSMODG00000000178		0	0	0	0	0	0	0	0	0.806098	0	0	0
ENSMODT00000000211.2	ENSMODG00000000179		0.39895	0.633939	0.313733	0.286406	0.636134	0.203731	0.25519	0.745535	0.874803	22.5083	2.59728	3.51307
ENSMODT00000000213.5	ENSMODG00000000180	AMOTL1	10.1795	12.5935	19.5	0.520066	0	1.28102	0	3.14396	2.63519	2.18764	14.9938	12.3121
ENSMODT00000000214.4	ENSMODG00000000181	TMEM9	8.44301	8.14334	1.44627	0.731354	14.832	3.26751	15.6564	16.9078	23.577	14.3236	3.51285	3.81021
ENSMODT00000000217.3	ENSMODG00000000182	AMZ1	2.5407	1.94778	0.445644	0.419428	0.100952	0.648242	0.215106	0.230341	0.748496	0.376813	8.68601	9.53776
ENSMODT00000000218.4	ENSMODG00000000183	LBP	320.213	422.116	2.43136	2.84558	704.011	23.1445	251.163	85.6725	403.788	234.026	482.215	217.574
ENSMODT00000000220.4	ENSMODG00000000187	SYT4	0.3983	0.261956	0.176439	0.138633	0	0.0759876	0.152041	0.103988	0.264859	0.202056	0.510811	0.599412
ENSMODT00000000221.4	ENSMODG00000000184	INO80	14.5088	15.2051	8.71683	3.38474	7.56059	6.56654	4.58296	12.1748	13.8935	9.6045	13.9754	17.8868
ENSMODT00000000226.4	ENSMODG00000000188	CFAP70	17.8108	9.99142	2.95764	1.6592	3.0592	1.40772	0.654942	1.90251	3.30827	1.28923	28.8263	30.3923
ENSMODT00000000227.3	ENSMODG00000000190	CHAC1	2.13014	1.72171	47.0849	39.4832	6.86242	28.158	6.59954	35.2636	48.907	85.28	3.68566	2.83414
ENSMODT00000000230.4	ENSMODG00000000192	GNA12	9.488	9.991	5.08638	0	14.0166	4.55936	2.72875	7.88223	12.5769	14.9995	14.3458	20.7705
ENSMODT00000000232.4	ENSMODG00000000195		2.98945	0.138015	0.195436	0	0	2.87437e-07	0.46991	0.363283	1.08908	0.344881	2.30603e-10	0.00322407
ENSMODT00000000233.4	ENSMODG00000000193	CLASP1	4.48019	5.99945	12.5898	0.405767	13.0735	3.25192	2.59911	10.0186	13.2614	8.65839	11.1207	11.2918
ENSMODT00000000236.3	ENSMODG00000000199		23.8552	25.8742	16.4002	8.40395	37.395	18.4181	21.8512	42.9437	32.838	29.8124	43.3361	39.7249
ENSMODT00000000237.3	ENSMODG00000000198	DLL4	4.48311	3.65598	3.09305	1.21506	3.2951	9.59086	0.755551	9.27808	7.10268	6.28462	2.62257	2.52061
ENSMODT00000000239.4	ENSMODG00000000200	VPS18	14.342	14.2471	16.9265	7.65009	20.4636	12.0195	12.3617	19.9082	24.2208	19.876	25.5074	22.9748
ENSMODT00000000241.3	ENSMODG00000000203	TGM2	297.183	958.904	119.956	18.2818	9.43781	123.954	19.2023	110.565	315.453	517.309	1214.99	513.644
ENSMODT00000000245.4	ENSMODG00000000204	DENND6A	26.1756	30.1316	20.9441	5.4598	12.0013	19.7079	9.32795	31.4578	37.1163	26.7627	45.1959	45.8087
ENSMODT00000000246.4	ENSMODG00000000207	RHOV	4.12855	3.86356	20.3848	6.36238	12.5432	10.3622	6.6731	18.6593	22.828	14.0734	6.33226	8.47652
ENSMODT00000000247.4	ENSMODG00000000211		0.424513	0.190361	0.877086	0	1.50266	1.46616	1.10451	0.442468	1.41644	1.29766	1.07661	1.19108
ENSMODT00000000248.4	ENSMODG00000000211		127.153	118.604	73.3565	56.3268	131.995	79.2481	129.127	137.742	179.157	132.272	154.825	127.589
ENSMODT00000000249.5	ENSMODG00000000208	DIS3	23.4376	29.4899	14.8034	9.00375	7.87659	9.68736	8.3007	20.75	32.8573	25.0131	65.0437	55.3098
ENSMODT00000000253.2	ENSMODG00000000210	RPRD1B	7.57227	11.7169	6.28802	2.89421	3.81009	5.10591	2.8553	7.35045	10.8768	7.47122	21.8102	20.8301
ENSMODT00000000254.2	ENSMODG00000000211		0.325801	0.361492	0	0.109748	0	0.0583916	0.225832	0.0503493	0.631914	0	0.301614	0.335542
ENSMODT00000000255.4	ENSMODG00000000212	SPINT1	68.9193	58.4033	86.5969	57.4636	325.078	157.143	114.581	220.858	299.403	146.194	26.105	39.0185
ENSMODT00000000257.4	ENSMODG00000000213	CARD11	0.151116	0.425107	0	0	0	0	0	0	0	0.185896	0.4453	0.506097
ENSMODT00000000258.3	ENSMODG00000000214	TTI1	4.37077	4.43124	2.93469	0.963004	5.50671	2.28403	2.60736	4.59015	7.4846	5.12762	9.36883	7.12071
ENSMODT00000000259.3	ENSMODG00000000215		4.42135	4.00801	2.33158	2.12617	1.41958	4.03581	2.4676	6.14269	11.3124	4.09056	2.47863	3.90447
ENSMODT00000000262.4	ENSMODG00000000217	PIWIL4	3.03193	1.74152	0.0273917	0.0413639	0.0638418	0.230419	0.032296	0.409823	0.723744	0.0653252	0.707864	0.439756
ENSMODT00000000263.3	ENSMODG00000000218	VSTM2L	3.51901	1.15856	0.261337	0.284602	0.401043	2.40096	1.29829	1.42127	1.0469	1.54818	1.33121	2.51009
ENSMODT00000000266.4	ENSMODG00000000219	PIK3C3	0.193576	0	0	0	0	0	0.119996	0	0.388786	0	0	0
ENSMODT00000000267.4	ENSMODG00000000220	PPP3CB	1.25122e-06	1.40264e-06	0	1.45312	15.8075	3.3334e-06	3.76862e-07	14.585	13.6712	7.98247	1.75356	25.2497
ENSMODT00000000268.4	ENSMODG00000000221	ZFYVE19	5.23929	4.85565	5.51325	6.06422	8.34355	8.36375	7.80383	12.0044	16.4869	7.89573	4.62683	6.53023
ENSMODT00000000269.4	ENSMODG00000000222	ANKRD49	19.3335	17.2626	8.42866	10.6954	7.68952	16.5551	17.8233	25.1865	31.2695	26.0112	38.909	42.4415
ENSMODT00000000270.4	ENSMODG00000000223	ZNF330	61.6574	71.5488	46.2923	37.0368	73.6953	33.4841	47.8893	63.9096	68.3189	63.085	89.1355	92.2637
ENSMODT00000000273.4	ENSMODG00000000226	CTNNBL1	45.9503	51.7476	36.7914	33.4078	28.1972	23.7604	26.6061	31.5878	43.8577	37.95	56.3439	47.1036
ENSMODT00000000275.3	ENSMODG00000000228	GCHFR	48.1271	51.3121	55.3456	42.7659	10.8452	269.148	283.241	50.4478	45.0101	44.8722	12.0225	8.0518
ENSMODT00000000278.4	ENSMODG00000000227	SLMAP	40.6457	38.6645	24.525	9.17379	20.1871	26.0243	24.1726	40.9054	46.8516	45.8992	73.2418	56.0274
ENSMODT00000000279.4	ENSMODG00000000229	TFCP2L1	5.92596	8.61857	8.39033	1.86267	1.25583	1.68278	0.750803	8.58785	29.4198	12.6638	10.3444	9.04757
ENSMODT00000000280.4	ENSMODG00000000231	MRE11	14.8301	20.943	9.04866	3.01026	6.21625	5.68885	6.28731	16.2439	19.5952	15.0722	34.337	24.6009
ENSMODT00000000282.4	ENSMODG00000000232	SDK1	0	0	0	0	0	0	0	0	0	0	0	0
ENSMODT00000000287.4	ENSMODG00000000233	DNAH9	0.00420407	0.0182357	7.09517e-10	1.25339e-07	6.27971e-10	1.11099e-10	0.00365396	0	0.129475	3.99465e-05	3.04872	7.67333
ENSMODT00000000290.3	ENSMODG00000000236	GPR83	0	0.0183529	0	0	0	0	0	0	0	0	1.04803	1.87443
ENSMODT00000000295.4	ENSMODG00000000243		0	0	0	0	0	0	0	0	0	0	0	0
ENSMODT00000000296.3	ENSMODG00000000241	AQP5	46.4948	26.8036	492.103	409.825	198.206	6.40473	19.605	13.9678	12.0246	12.9551	33.1593	36.3607
ENSMODT00000000298.4	ENSMODG00000000242		3.44751	3.04021	2.02077	1.67423	0.409424	1.16675	0.871196	2.23763	3.7761	1.4476	1.34185	2.64578
ENSMODT00000000299.4	ENSMODG00000000244		3.55725	3.45297	4.38947	6.3152	16.1167	4.84437	4.46408	0.811924	1.02924	1.35913	0.355872	0.83354
ENSMODT00000000303.3	ENSMODG00000040026		0.182711	0.232906	0	0	0	0.127208	0.256999	0.802939	1.80052	0.647153	0.233243	2.20827
ENSMODT00000000304.3	ENSMODG00000000247	SRC	0.605602	0	0	0	0	0	0	0	0	0	0	0
ENSMODT00000000305.2	ENSMODG00000000249	RMDN3	3.46537	4.66981	1.89377	2.36279	4.13078	5.07087	8.80327	4.2274	11.3482	5.86107	3.40049	3.15698
ENSMODT00000000310.4	ENSMODG00000000252	KLHL21	9.71059	9.73623	6.71045	3.78451	9.11835	6.24819	8.24935	5.009	6.98176	5.59214	4.46311	6.65981
ENSMODT00000000311.4	ENSMODG00000000253	MANBAL	50.0779	50.0757	56.3305	53.5456	19.5832	43.2379	30.2845	47.0776	51.7088	52.4097	60.6154	54.3579
ENSMODT00000000317.4	ENSMODG00000000250	USP54	9.52858	8.32854	7.07809	3.8509	28.3545	16.9466	74.8386	48.2286	25.5791	16.175	19.0209	15.8849
ENSMODT00000000326.3	ENSMODG00000000264	RALB	81.2615	89.5083	44.6649	34.7008	45.9292	97.1113	71.2642	133.142	239.45	258.775	120.774	123.188
ENSMODT00000000330.3	ENSMODG00000000268	RAD51	6.76304	13.7956	0.775705	0.832409	11.3372	4.8119	7.55268	12.4292	23.005	3.85456	30.4759	31.8351
ENSMODT00000000334.4	ENSMODG00000000272	MYOZ1	0	0	0	0	0	0.0987225	0.12461	0	0	0	0	0
ENSMODT00000000336.4	ENSMODG00000000273		43.7212	46.2354	30.9228	24.4803	22.2804	18.806	16.6918	30.4767	33.2214	31.3157	46.4897	46.1276
ENSMODT00000000337.3	ENSMODG00000000275	RPL28	2163.54	2189.7	1213.27	1874.64	1104.51	1077.17	1151.41	538.024	484.276	568.414	598.451	783.68
ENSMODT00000000340.3	ENSMODG00000000278	PANX1	4.34242	6.43833	0.861605	0	1.06379	0.38572	0.337786	1.05052	2.97482	2.34133	16.7497	17.9424
ENSMODT00000000342.3	ENSMODG00000000279		5.96306	6.60147	5.62624	8.98454	12.6284	8.26777	9.0648	7.80625	4.98837	4.55123	4.19529	8.81981
ENSMODT00000000343.4	ENSMODG00000000280	PCBP2	171.186	181.993	102.696	81.3428	115.398	103.292	80.8988	103.256	112.572	95.6822	67.9557	128.723
ENSMODT00000000345.4	ENSMODG00000000281	TLE2	3.30003	3.35409	2.31856	1.17083	0.866747	1.40597	1.01048	0.702223	0.570709	0.525548	0.79435	2.3164
ENSMODT00000000348.4	ENSMODG00000000285	CCN1	11.2652	35.6908	9.48094	9.20694	3.5469	23.8241	8.95025	21.5456	40.0268	81.5993	19.8763	21.1636
ENSMODT00000000350.3	ENSMODG00000006321		2.08801	2.99231	0.465657	0.0594959	0.374215	1.69852	0.207853	1.41114	3.10094	4.72953	3.08066	4.05682
ENSMODT00000000351.4	ENSMODG00000000289	JAZF1	29.1383	25.4604	8.07531	9.35367	3.14815	10.4579	9.8578	12.4818	7.61447	4.82808	13.5961	16.9408
ENSMODT00000000354.3	ENSMODG00000000291	SYNPO2L	0	0.0106647	0	0	0.0627774	0.0110219	0	0	0	0	0	0
ENSMODT00000000355.4	ENSMODG00000000292	DDAH1	1.84368	1.39633	0.778591	0.308032	0	3.43901	0.5831	3.82183	2.4143	4.44733	2.1906	3.27405
ENSMODT00000000358.4	ENSMODG00000045812		0	0.355904	0.219499	0	0.046422	0	0.0455517	0.0426173	0	0.0758167	0.935924	1.2242
ENSMODT00000000359.4	ENSMODG00000000298		5.285	3.41647	2.68981	0.713416	1.20207	0.185051	0.517349	1.55406	0.785198	0.756095	11.9832	13.239
ENSMODT00000000363.3	ENSMODG00000000300	RPUSD2	2.40664	2.36687	1.19634	0.356553	1.74347	0.882707	0.530867	3.16222	4.35043	2.87746	5.9206	3.9126
ENSMODT00000000365.4	ENSMODG00000000302	C1orf52	18.5881	21.5501	13.8705	20.1926	12.7344	31.7388	18.9375	24.8377	21.0603	19.512	14.2768	12.8508
ENSMODT00000000369.3	ENSMODG00000000304		0	0	0.0575845	0	0	0	0	0	0	0	0	0.0929989
ENSMODT00000000370.4	ENSMODG00000000306		0	0	0	0	0	0	0	0	0	0	0	0
ENSMODT00000000371.4	ENSMODG00000000308	INPP4B	0.496509	0.873737	1.35689	0.184667	0.358093	0.591899	0.327735	0.718655	0.192141	0.590568	1.98103	2.68218
ENSMODT00000000373.4	ENSMODG00000000309	SUSD2	0.501969	1.15846	0.0366472	0.0464655	0.0856694	0.407277	0.21876	0.472373	0.789473	0.318409	0.565136	1.10242
ENSMODT00000000375.2	ENSMODG00000002806		0	0.13227	0	0	0	0	0	0	0	0	0	0
ENSMODT00000000377.4	ENSMODG00000000311	SYDE2	19.4088	25.8901	19.2127	1.15602	2.56695	14.8391	7.03978	25.032	16.2715	15.8459	16.1368	20.4722
ENSMODT00000000379.3	ENSMODG00000000312		0.126753	0.112398	0.0412324	0.0286138	0.0533928	0.0388277	0.0741202	0.598767	0.59968	0.485524	0.310982	0.104874
ENSMODT00000000381.4	ENSMODG00000000316	BAHD1	2.51637	1.81323	0.443965	0	0.611808	0.912746	0.593305	0.562953	0.637649	0.243683	0.121636	0.526193
ENSMODT00000000383.4	ENSMODG00000000315		68.4674	77.4239	56.0871	43.2204	316.874	76.8627	151.5	278.697	184.684	111.853	137.037	123.563
ENSMODT00000000385.4	ENSMODG00000000314	RPN2	147.356	169.634	504.114	357.697	319.783	132.621	212.056	259.461	285.021	274.325	392.608	293.857
ENSMODT00000000386.4	ENSMODG00000000317		0	0	0.168454	0	0.343462	0	0.0461379	0	0.645456	0	0	0
ENSMODT00000000388.4	ENSMODG00000000305		0.320058	0	1.08308	0.0851736	0.412298	0.250409	0	1.45098	4.70984	2.45007	2.95964	2.70098
ENSMODT00000000390.3	ENSMODG00000000320	PKDCC	32.2439	35.2402	5.97233	5.09284	1.33149	8.09948	9.34801	4.74384	3.88932	2.99365	21.8917	23.2511
ENSMODT00000000391.5	ENSMODG00000000319	USP38	0	0	0	0	0	0	0.325661	0	1.44548	0.371839	1.07148	1.10315
ENSMODT00000000393.3	ENSMODG00000000322		0.0854302	0.0872177	0.09677	0	0	0	0	0.285131	0	0	0.438749	0
ENSMODT00000000395.4	ENSMODG00000000324		30.5153	23.203	5.08654	3.17407	3.205	10.8394	5.48458	5.53412	8.56652	9.71864	15.9822	11.2635
ENSMODT00000000396.3	ENSMODG00000000326	GTPBP6	21.0898	25.0961	39.4009	39.6678	15.2615	16.6352	19.5575	26.667	37.1864	33.1144	32.1382	38.9699
ENSMODT00000000397.4	ENSMODG00000000325	PTPN4	3.4035	4.97913	3.75122	0	0	0.854554	1.13843	5.15541	10.0577	7.03595	14.7713	15.3211
ENSMODT00000000398.4	ENSMODG00000000327		9.28075	7.33578	2.42845	2.02766	0.812314	2.72505	4.0504	3.77749	9.15266	7.16116	17.4592	17.0728
ENSMODT00000000399.3	ENSMODG00000000328		30.652	27.2059	200.828	27.0568	76.0165	96.493	5.60832	210.617	156.402	156.21	12.5073	3.45022
ENSMODT00000000400.4	ENSMODG00000000329	PKP1	2.18022	3.13612	6.38566	0.624361	1.84852	3.21048	1.14436	3.06103	28.477	39.1561	1.77269	1.94079
ENSMODT00000000401.3	ENSMODG00000000330	IVD	36.9474	45.9684	2.07022	1.57051	16.8078	33.1507	11.9924	39.1629	23.6165	21.5181	39.1784	31.9096
ENSMODT00000000404.3	ENSMODG00000000333		0.152972	0	0.331944	0	1.92041	0	0	0.175065	0.399253	0.496174	0.150751	0
ENSMODT00000000405.3	ENSMODG00000000334	GGT5	50.2268	44.4547	8.51533	9.71564	12.3305	17.4116	16.9541	8.84498	8.83189	9.85407	17.9557	23.842
ENSMODT00000000408.3	ENSMODG00000000336	GAB1	7.57074	8.6833	3.5451	0	10.9844	5.44446	1.68736	9.41683	6.88448	9.0772	6.07084	13.9952
ENSMODT00000000409.4	ENSMODG00000000337		0.223251	0.0442796	0.0380045	0	0.0265415	0.0170568	0	0	0.0578244	0	0.184353	0.193825
ENSMODT00000000411.3	ENSMODG00000000339	EML4	2.87993e-05	2.69288	0.995535	3.16284e-07	3.89817	2.64068	0.000902682	6.15954e-05	8.99593	1.43555e-07	5.98688	10.2201
ENSMODT00000000413.4	ENSMODG00000000340	HIBADH	49.8527	59.4703	78.5608	37.4744	77.6025	42.5513	53.0281	67.8907	52.2515	38.9363	59.036	67.9529
ENSMODT00000000414.2	ENSMODG00000000342	COX7A2L	91.2521	88.497	119.666	138.185	126.684	89.1912	108.273	102.45	169.908	158.879	92.977	123.664
ENSMODT00000000415.4	ENSMODG00000000343	ADPRM	3.0154	3.54857	2.20771	0	1.37556	0.431287	1.22642	3.11208	3.14305	1.40739	1.88293	4.70246
ENSMODT00000000417.3	ENSMODG00000000344	TNNI3K	0	0	0	0	0	0	0	0	0	0	0	0
ENSMODT00000000418.4	ENSMODG00000000345		1.74664	0.850516	0.793973	0.209821	0	10.0025	1.65671	5.61129	7.18431	5.96654	4.24831	14.219
ENSMODT00000000419.4	ENSMODG00000000347	PLCXD1	8.33568	8.88968	5.72111	1.36569	1.5071	3.37915	1.69284	5.02497	12.9396	10.3296	20.1312	18.2025
ENSMODT00000000424.3	ENSMODG00000000348	DENND2C	4.94866	5.20356	0.367825	0.21268	1.42684	5.45355	4.92756	8.40414	10.5724	12.9367	5.31839	5.66896
ENSMODT00000000426.2	ENSMODG00000000350	KCNG3	0.269846	0.22914	0.224199	0.139099	1.69449	0.239691	0.349403	0.459807	0.130729	0.108036	0.0995465	0.331385
ENSMODT00000000427.3	ENSMODG00000000346		2.20528	1.7761	3.57311	0.139313	4.98983	0.643991	0.850349	10.357	20.8705	11.7308	22.9782	24.9067
ENSMODT00000000430.4	ENSMODG00000000351	CFAP221	55.3254	31.619	7.94609	4.38722	3.34523	1.24351	2.31325	3.88222	4.66841	3.15006	70.5028	98.5656
ENSMODT00000000431.3	ENSMODG00000000352		0	0.0652296	0.0249907	0	0	0	0	0	0	0	0.0701358	0.0777376
ENSMODT00000000432.3	ENSMODG00000000353		0	0	0	0	0	0	0	0	0	0	0	0
ENSMODT00000000433.4	ENSMODG00000000354	WDR63	22.4474	14.2592	15.5407	1.316	0.815071	15.9632	4.47273	0.898746	2.21023	1.15523	20.4892	31.7152
ENSMODT00000000434.3	ENSMODG00000000355	FUT11	35.3287	41.0874	12.0441	3.32782	2.97543	14.0096	4.67235	14.4407	14.2842	16.7637	16.7911	16.9706
ENSMODT00000000436.4	ENSMODG00000000356		0.155987	0.106598	0.083423	0.024986	0	0.02221	0	0.0714712	0.0807129	0.0341619	0.43537	0.597927
ENSMODT00000000437.2	ENSMODG00000000358		0.566097	0.471434	0.115812	0.267162	0.316518	1.33691	0.433224	0.964274	0.649549	0.39858	0.627963	0.790416
ENSMODT00000000439.4	ENSMODG00000000357	HEPHL1	0.227848	0.190419	0.081724	0.0963204	0	0.246154	0.160625	0.69684	1.61524	0.640516	0.294137	0.730716
ENSMODT00000000440.5	ENSMODG00000000359	FHOD3	0.132605	0.376119	0	0	0	0.358116	0	0.375276	0.269491	0.594286	0.637242	0.710642
ENSMODT00000000441.2	ENSMODG00000000361	CHCHD1	187.311	221.345	150.624	244.058	152.885	153.538	162.567	69.9688	101.116	90.5233	107.892	116.219
ENSMODT00000000444.4	ENSMODG00000000363		7.3071	9.60061	12.0805	4.34606	3.24153	3.40301	1.75776	8.17036	8.70416	5.13064	11.9976	10.4767
ENSMODT00000000447.4	ENSMODG00000000364	TNNT2	0	0.00172956	0	0.400336	0	0.312467	0.55692	0.923995	0	0	0	0.429081
ENSMODT00000000448.2	ENSMODG00000000365		0.699675	0.749912	0	1.21897	0	0.938294	0.890319	0.669781	0.451905	0.935822	0	0
ENSMODT00000000450.3	ENSMODG00000000367	BCAS2	58.6018	55.2526	34.4261	40.5798	22.3873	38.6784	34.2219	46.2505	49.8816	53.8566	53.463	62.004
ENSMODT00000000456.2	ENSMODG00000000373		0	0	0	0	0	0	0	0	0.166504	0.140468	0	0
ENSMODT00000000458.4	ENSMODG00000000374	RBL1	0	0	0	0	0	0	0	0	0	0	0	0
ENSMODT00000000459.4	ENSMODG00000000375		7.06012	9.89359	7.47676	11.4352	0.304497	8.61571	2.74655	2.7237	7.11679	6.91957	11.5343	9.2991
ENSMODT00000000460.3	ENSMODG00000000376	MTA3	4.39937	16.5045	28.6724	11.4084	20.7281	7.73027	0.816463	2.47371	19.0953	2.45741	12.5278	19.4581
ENSMODT00000000462.3	ENSMODG00000000378	MCOLN3	1.44816	1.80673	0.105386	0	0.490551	1.18588	0.224028	1.39485	5.62871	17.9331	4.70933	4.67822
ENSMODT00000000464.4	ENSMODG00000000380	SCTR	0.206814	0.51454	11.2944	1.02406	0	0.561701	0.0890935	2.21498	1.0888	0.799238	2.21786	3.7997
ENSMODT00000000468.4	ENSMODG00000000382	TMEM37	2.68267	2.13438	0.593731	0.880517	8.14358	39.0788	12.5773	19.5309	23.4546	54.9261	0.817667	3.26871
ENSMODT00000000470.3	ENSMODG00000000384		5.09064	4.67174	1.73109	0.910003	0.752356	1.14497	1.56408	1.67864	2.51408	2.7499	12.6416	8.97821
ENSMODT00000000472.4	ENSMODG00000000383		13.6806	15.6708	10.6318	7.02895	4.50583	5.90937	4.60878	17.2492	26.6458	16.9552	24.4992	22.2562
ENSMODT00000000474.4	ENSMODG00000000386		25.374	20.6252	42.3642	11.3074	0.475583	0.901022	1.33124	1.75376	2.83744	4.80357	24.9234	22.4938
ENSMODT00000000475.4	ENSMODG00000000387	MOCOS	0.126744	0	0	0	0	0	0	0.182725	0.357658	0.170506	0	0.704763
ENSMODT00000000476.3	ENSMODG00000000388	ZCCHC4	14.2393	12.9132	15.1484	11.7546	8.99707	8.91355	8.5858	19.1218	19.8482	16.9493	25.6522	29.4523
ENSMODT00000000479.4	ENSMODG00000000390	MCOLN2	0.57727	0.272891	0	0	0	0.185694	0	0.605423	0	0.66537	0	0
ENSMODT00000000480.4	ENSMODG00000000391	SMARCA5	36.2231	40.2197	50.7908	24.8498	19.1692	17.9874	22.6433	40.7388	58.4647	41.6236	92.5664	91.2576
ENSMODT00000000481.2	ENSMODG00000000392	HAAO	0.911096	0.237725	0.0871265	0.0822357	4.16063	23.6076	1.69643	12.8561	12.1492	24.4159	0.363906	1.10061
ENSMODT00000000482.3	ENSMODG00000000393		796.18	1012.85	3464.87	6468.56	0	1960.11	1769.05	762.2	821.789	866.806	500.586	503.848
ENSMODT00000000485.3	ENSMODG00000000395	TNNI1	0.0547806	0.0529758	0.0103983	0.220374	0	0	0	0.0582	0	0.111867	0	0.0890139
ENSMODT00000000486.3	ENSMODG00000000397		46.6219	61.4026	111.081	52.6343	209.276	34.7928	107.379	55.6161	61.4089	49.7055	61.2324	69.8137
ENSMODT00000000490.4	ENSMODG00000000399	RPRD1A	1.83262	2.51297	16.5603	20.9451	7.86288	6.61364	4.5533	5.86594	3.23442	5.21965	3.69857	2.62602
ENSMODT00000000493.4	ENSMODG00000000401	LPAR3	1.74879	1.16158	0	0	0	0.785074	0	0.00666086	3.86929	1.68651	0	7.85349e-05
ENSMODT00000000494.4	ENSMODG00000000403	CSRP1	612.603	626.945	1341.06	659.964	118.789	351.717	207.578	305.08	226.587	214.13	985.282	437.417
ENSMODT00000000495.3	ENSMODG00000000405		14.245	15.5968	146.681	44.7898	34.4384	9.92738	12.0092	27.1445	27.3361	24.5781	20.135	24.6308
ENSMODT00000000497.4	ENSMODG00000000406	RALGAPB	6.79159e-07	0.000607774	3.52489e-05	0.0551033	3.58902e-06	0.849391	4.58647e-06	3.59092e-05	1.71144	0.000279367	6.78977e-06	1.03834e-05
ENSMODT00000000498.3	ENSMODG00000000407	ZFP36L2	134.754	135.157	25.1015	7.28603	35.7985	36.6165	22.1168	34.9704	101.318	59.944	35.8073	62.9857
ENSMODT00000000499.4	ENSMODG00000000408	STEAP3	32.4096	38.6873	111.857	29.6759	16.6117	6.38177	8.55698	6.37341	12.7928	5.99281	21.3314	21.7065
ENSMODT00000000500.4	ENSMODG00000000409	SSX2IP	23.6226	29.5173	20.7193	8.37953	10.9375	16.2307	12.3203	28.7086	28.72	33.5677	54.2617	75.4273
ENSMODT00000000505.3	ENSMODG00000000412		37.0806	35.3647	59.8729	31.3529	79.927	40.0618	54.5249	113.965	151.475	119.077	48.8885	52.0979
ENSMODT00000000508.3	ENSMODG00000000415		8.40675	9.80554	13.7615	7.61148	13.4271	6.06366	8.13719	12.5655	27.9422	19.5827	18.316	21.9118
ENSMODT00000000509.4	ENSMODG00000000414		15.6631	14.5565	17.0613	5.90182	25.2693	23.6578	27.261	30.7123	24.5504	23.1763	6.53548	12.2769
ENSMODT00000000513.3	ENSMODG00000000417		0.0243084	0.0135701	0.0037334	0.00727349	0	0.0351895	0.0222867	0.026886	0.0076489	0.0192944	0.0750843	0.0583685
ENSMODT00000000514.5	ENSMODG00000000420	C1QL2	0.524236	0.373214	0.329342	0.0866801	0.0806226	0.518793	0.514822	0.772322	1.54971	1.41353	1.88007	1.78363
ENSMODT00000000516.4	ENSMODG00000000421	CTBS	66.3325	89.9266	299.91	190.238	46.6928	16.0694	30.538	22.5984	24.0049	19.9137	42.9448	42.0893
ENSMODT00000000518.2	ENSMODG00000000422		0.635941	0.274106	0.199381	0	0	0	0.12409	0.414668	0.156935	0.400841	0.36618	0.939207
ENSMODT00000000520.3	ENSMODG00000000423	SEPSECS	22.7826	24.8865	51.2475	24.1301	18.2932	10.7959	10.2331	28.3411	35.8578	29.3863	44.5554	52.9555
ENSMODT00000000524.4	ENSMODG00000000427		23.6098	24.273	13.4506	6.71403	20.6099	12.1821	11.5333	14.7187	19.328	14.6723	14.3003	24.4407
ENSMODT00000000525.3	ENSMODG00000000429	SLC32A1	0	0	0	0	0	0	0	0.0646475	0	0.0609422	0	0.0617741
ENSMODT00000000530.4	ENSMODG00000000433	MARCO	2.37098	1.27814	0.330552	0.383908	0.473614	1.21595	1.90859	5.35061	2.05416	17.383	2.72647	1.81252
ENSMODT00000000531.4	ENSMODG00000000432	HHIP	0.736475	1.95874	4.48018	0.335203	0	5.40515	7.06953	16.2595	23.4093	16.4562	1.77019	1.29045
ENSMODT00000000533.4	ENSMODG00000000436	ELP2	6.43836	6.59572	8.70672	1.03354	3.72482	1.65782	2.16076	1.56056	2.63491	3.59299	12.7322	9.77978
ENSMODT00000000535.4	ENSMODG00000000439		7.68635	10.7147	7.70936	9.6579	9.22816	13.8907	16.3427	21.2788	19.8644	20.2925	14.8102	17.2269
ENSMODT00000000538.4	ENSMODG00000000441	CNTN5	0.012571	0.0125005	0	0	0	0.311659	0	1.16356	1.21779	3.59436	0.040107	0
ENSMODT00000000539.5	ENSMODG00000000442	ACTR5	10.4577	10.19	4.22283	6.55602	3.78441	4.35767	6.70586	12.1336	14.0816	10.8234	23.237	20.4468
ENSMODT00000000541.4	ENSMODG00000000443	TRIM33	0	0	0	0	0	0	0	0	0	0	0	0
ENSMODT00000000542.4	ENSMODG00000000447	EVX1	0.269724	0.0516406	0	0	0	0	0	0.0651157	0	0	0.360432	0.18631
ENSMODT00000000543.4	ENSMODG00000000446	LRP8	2.89377	3.10525	10.4665	2.53266	58.0689	2.11345	10.4728	10.6971	5.03246	2.27386	3.31131	2.73284
ENSMODT00000000545.4	ENSMODG00000000444	JADE3	7.56672	8.29496	3.68324	0.444796	2.45656	1.2559	0.625856	4.2738	4.4067	4.25889	13.8107	15.5057
ENSMODT00000000547.4	ENSMODG00000000449	HOXA13	13.7931	8.22402	0.034632	0	0	1.38216	1.37283	1.05928	0.233392	0.190239	1.9102	1.91169
ENSMODT00000000549.3	ENSMODG00000000452	RPF1	26.4852	30.309	23.7866	21.7259	11.494	15.3506	18.6246	25.6417	36.1594	25.8968	48.7716	47.3667
ENSMODT00000000551.5	ENSMODG00000000453	HOXA11	38.0498	32.5141	5.86701	4.8539	2.54034	10.0909	10.3382	7.80261	6.51529	3.84507	22.5122	9.79867
ENSMODT00000000552.4	ENSMODG00000000454	RP2	19.3984	19.0098	13.9311	3.71016	8.36272	12.3242	5.26434	35.3048	26.3341	27.8969	36.7426	36.0875
ENSMODT00000000554.3	ENSMODG00000000451	THADA	2.67512	2.62021	1.39135	0.79239	0.000826988	0.738913	0.758917	1.09126	1.88375	0.650706	1.46912	1.14486
ENSMODT00000000555.2	ENSMODG00000000455		6.4991	8.39531	0.870078	1.60607	3.26534	3.35353	2.75132	3.92676	6.28502	2.39931	7.08395	7.27869
ENSMODT00000000556.3	ENSMODG00000000456	FAM83D	1.96568	3.46004	1.07218	0.729606	0.0915402	0.821491	0.599076	0.425232	0.483982	1.11306	4.70059	8.14591
ENSMODT00000000557.3	ENSMODG00000000457		214.276	208.747	99.8707	184.587	185.627	643.448	1665.82	438.819	442.365	370.138	454.223	675.771
ENSMODT00000000558.4	ENSMODG00000000458		0.916491	0.874776	0	0	9.73845	0.43043	0	1.78477	3.56956	0	0.644955	0
ENSMODT00000000559.5	ENSMODG00000000460	LGI2	1.09639	2.0041	81.8587	31.0917	2.32771	0.333003	0.531546	0.411203	0.294552	0.482702	0.409888	0.556566
ENSMODT00000000560.4	ENSMODG00000004974	INSIG1	75.189	71.3764	54.9826	30.4165	93.0595	26.257	37.4136	42.0018	32.005	26.9067	58.1053	48.7289
ENSMODT00000000561.4	ENSMODG00000000459	NAV1	0	0	0	0	0	0	0	0	0	0	0	0
ENSMODT00000000565.3	ENSMODG00000000462	MAGOH	99.7159	109.465	87.2654	131.566	49.0773	75.429	62.4693	62.8986	96.8306	101.61	104.2	92.1079
ENSMODT00000000567.5	ENSMODG00000000463	HOXA10	20.6136	18.2679	2.45512	2.93372	1.48374	5.31947	5.38746	3.27675	3.51425	2.15628	19.599	10.3828
ENSMODT00000000568.3	ENSMODG00000000466		0.750487	0.623522	1.41591	0.539259	1.63699	0.607043	0.361134	0.761826	0.862682	1.15006	1.84616	0.976167
ENSMODT00000000569.4	ENSMODG00000000465	ABCE1	79.3929	102.368	117.919	74.0776	63.7758	54.2402	55.4795	110.267	131.478	114.593	183.577	166.497
ENSMODT00000000573.3	ENSMODG00000000470		70.2534	73.1657	106.115	159.134	92.1244	58.9656	61.9198	22.9686	42.7329	49.2969	38.1719	45.2465
ENSMODT00000000574.4	ENSMODG00000000471	CCDC149	3.21106	4.7667	20.4399	3.72385	13.8701	2.14932	2.11903	3.09478	4.47555	6.27623	5.25356	11.7388
ENSMODT00000000576.3	ENSMODG00000000472	HOXA6	1.3767	1.34602	0.270159	0.0368887	0.3416	0.577706	0.137487	0.520138	0.262739	0.546299	5.81214	11.6921
ENSMODT00000000577.3	ENSMODG00000000474		28.5046	28.3493	95.6586	152.017	23956.7	5802.77	12695.4	12697.4	5455.91	2949.79	27.9011	49.2405
ENSMODT00000000578.3	ENSMODG00000000475	DISP2	0.315987	0.439578	0.0839566	0.0205867	0.0395999	0.272125	0.13788	0.138315	0.352148	0.30138	0.313463	0.589259
ENSMODT00000000579.5	ENSMODG00000000476	SLC39A6	36.9456	44.1015	100.964	42.7842	47.2103	13.7564	28.7404	36.6066	64.3502	39.6251	93.3081	77.629
ENSMODT00000000580.4	ENSMODG00000000479	SLC9A7	0.38717	0.275907	0.467633	0.145983	0.695581	0	0.186511	0	0	0.707304	0	1.03659
ENSMODT00000000582.3	ENSMODG00000000481	CPT2	20.0601	19.0638	47.1432	29.2189	22.902	33.2043	36.4201	24.1423	28.5363	32.3167	11.6985	20.92
ENSMODT00000000587.4	ENSMODG00000000483	HOXA5	1.55859	1.55459	0.460038	0.239159	0	1.39095	0.544018	0.821152	1.65925	0.255582	11.3511	17.0929
ENSMODT00000000588.3	ENSMODG00000000482	NEGR1	0.503777	0.703712	0	0.0567179	0	0.284296	0.0726022	0	0	0	1.11167	0.247379
ENSMODT00000000589.4	ENSMODG00000000485	IPO9	25.9332	31.0598	15.6656	8.72364	14.0681	16.8165	12.2722	22.1252	27.0659	22.018	37.1332	32.7674
ENSMODT00000000591.3	ENSMODG00000000486	ARHGAP42	5.2538	4.45019	1.88974	0.249317	1.00924	3.48465	0.473218	10.8181	7.67823	5.01988	11.2377	9.69225
ENSMODT00000000593.4	ENSMODG00000000487	OTUD4	16.8695	16.9161	9.81546	2.39036	13.3164	6.30238	6.50668	22.2251	34.7551	25.319	51.3146	51.2394
ENSMODT00000000596.3	ENSMODG00000000488		10.7519	8.86485	5.64028	3.77489	4.43287	4.4817	2.30284	6.22115	9.71521	8.5606	13.7021	20.5775
ENSMODT00000000597.4	ENSMODG00000000490		4.85976	5.33051	3.03257	0.407204	0	0.690741	0.789848	3.373	4.17611	2.92555	9.64897	7.41234
ENSMODT00000000600.3	ENSMODG00000000492	SHISA4	1.16966	0	0.362986	0.555825	6.4032	5.62677	6.09908	22.4451	15.0842	18.1981	2.76436	3.15118
ENSMODT00000000601.4	ENSMODG00000000493		0.126453	0.118921	0	0	0	0.0623637	0	0	0	0	0	0.175233
ENSMODT00000000604.3	ENSMODG00000000495	DHX35	4.49043	4.5814	1.51225	0.878636	2.28063	2.48293	1.6261	3.1966	9.59407	6.93567	14.9444	14.0058
ENSMODT00000000606.4	ENSMODG00000000497	CCDC93	28.8557	34.5028	25.4594	18.1915	12.2578	20.9783	16.3537	36.9076	36.8723	46.0441	42.3591	50.9134
ENSMODT00000000607.4	ENSMODG00000000498		0.175292	0.0437953	0.0486312	0.147002	0	0	0	0.141324	0.321605	1.08141	0.122219	0.272864
ENSMODT00000000610.4	ENSMODG00000000500	SMAD1	66.2419	78.2687	46.1187	23.0546	11.6913	12.9222	12.3731	26.2315	42.3812	25.4212	50.2816	49.857
ENSMODT00000000611.4	ENSMODG00000000502	HOXA2	1.7519	1.53436	0.0533261	0.0732902	0	0.366269	0.21803	0.751469	1.13711	0.234945	5.41674	6.48618
ENSMODT00000000613.4	ENSMODG00000000501	GALNT1	43.6871	46.3232	91.658	50.8103	46.8851	22.8578	30.7755	38.656	57.5148	41.9016	59.792	93.2583
ENSMODT00000000617.4	ENSMODG00000000504	ZRANB2	17.2428	18.9871	27.56	19.7939	9.78538	9.77062	11.2323	19.9297	26.2169	15.3644	25.7885	36.1507
ENSMODT00000000618.3	ENSMODG00000000506		17.0496	15.7484	18.0153	24.1665	16.1917	12.6775	13.593	14.8409	24.3565	13.5632	21.7552	17.5958
ENSMODT00000000619.3	ENSMODG00000000505	LMOD1	39.6759	38.5452	7.30054	7.60609	3.15692	26.689	26.0275	21.3379	26.2603	14.8873	146.566	27.7541
ENSMODT00000000620.3	ENSMODG00000000507	HOXA1	0	0.0181857	0	0	0.0987052	0.448755	0.546559	0.336597	0.30676	0.448133	0.0576525	0
ENSMODT00000000621.4	ENSMODG00000000508	MMAA	4.41062	3.78848	6.46839	6.19997	2.07357	2.77342	3.58063	4.57197	5.55775	5.24615	9.84716	9.0759
ENSMODT00000000623.4	ENSMODG00000000510		0.0430267	0	0.160478	0	0	0	0	0	0	0	0	0
ENSMODT00000000627.3	ENSMODG00000000513	DNASE2B	0	0	0	0	0	0	0	0	0	0	0	0.0830868
ENSMODT00000000629.3	ENSMODG00000000517	TIMM17A	52.1125	60.7896	100.666	77.3752	65.9061	53.1235	60.3831	87.062	97.8287	106.974	71.9599	75.8811
ENSMODT00000000630.3	ENSMODG00000000518		2.74683	3.74889	2.18556	1.47252	0.89686	1.69607	0.939147	3.75792	6.83534	6.48457	7.27232	6.62999
ENSMODT00000000632.3	ENSMODG00000000515	PLEKHH2	2.15239	2.96949	0.562683	0.0747739	0.566754	2.59555	0.866036	3.26271	2.96856	3.25402	11.3864	8.9452
ENSMODT00000000634.4	ENSMODG00000000516	DHX15	48.4618	60.9829	74.5152	42.121	96.3115	33.6667	51.0465	75.1295	106.388	78.4237	149.194	126.239
ENSMODT00000000636.4	ENSMODG00000000829		0	0	0	0	0	0	0	0.134216	0.174374	0.117981	0	0
ENSMODT00000000638.4	ENSMODG00000000520	ZNF827	1.16615	1.39478	1.32082	0.153718	0.962477	0.656342	0.0726345	0.142186	0.789455	0.234456	0.876666	1.71192
ENSMODT00000000640.3	ENSMODG00000000521	SKAP2	11.4562	8.35249	14.8926	9.75719	13.9579	8.55001	10.4863	12.2776	17.7831	18.7235	10.8959	14.0033
ENSMODT00000000641.4	ENSMODG00000000522	SLC10A7	0.160627	0	0.851637	0	6.60307	0	0.567621	2.17217	3.59224	4.99552	3.1169	4.05097
ENSMODT00000000646.5	ENSMODG00000000527	RNPEP	31.5336	32.8721	94.951	71.1886	16.0391	19.7215	19.8513	24.86	19.6196	17.3502	20.5515	29.0048
ENSMODT00000000648.4	ENSMODG00000000525	TUBGCP5	4.12545	5.60016	2.32226	0.789733	1.91211	2.19823	1.24174	4.81992	13.3242	11.199	14.6663	15.1706
ENSMODT00000000650.4	ENSMODG00000000528	PLCB2	4.95116	3.50034	0.826927	0.570274	0.915308	0.786528	1.24047	1.27623	1.51684	3.04935	5.87629	5.98422
ENSMODT00000000653.4	ENSMODG00000000529	SCP2	69.1831	65.5303	105.456	98.1443	79.7455	98.5037	100.772	60.6302	46.0326	49.8145	34.0065	53.6164
ENSMODT00000000654.3	ENSMODG00000000531	ANKRD13C	26.1961	29.0883	22.5598	14.131	22.726	18.5442	17.5983	23.8937	20.6563	23.5721	22.0487	31.23
ENSMODT00000000655.4	ENSMODG00000000544		7.95543	6.38884	0.638987	0	2.79458	0.795526	0.256101	3.43766	1.42128	0.407862	8.08564	8.48384
ENSMODT00000000656.4	ENSMODG00000000533	DDX18	10.6657	14.1013	12.9714	3.17705	5.94962	3.68461	3.85847	9.05631	15.9028	10.4611	28.6708	29.5797
ENSMODT00000000658.4	ENSMODG00000000534	MAFB	10.0632	8.25905	2.01282	1.35185	7.83054	8.10325	4.34145	9.11399	9.85664	16.6297	9.46371	8.25864
ENSMODT00000000659.3	ENSMODG00000000535	PAK6	13.1952	17.0261	1.99088	1.44046	6.3376	23.7809	22.9527	19.4548	12.81	19.2847	13.7397	15.3409
ENSMODT00000000660.4	ENSMODG00000000537	TRPC6	0.195865	0.80357	0.621627	0.250961	0.660293	1.51695	0.166294	1.33431	0.965161	1.03065	0.92226	0.463361
ENSMODT00000000662.4	ENSMODG00000000538	LGALS2	0	0.379422	0	0.200686	24.5221	206.979	48.3706	80.6909	38.68	43.673	0.473568	0.527569
ENSMODT00000000664.4	ENSMODG00000000536	CAMK2G	0	0	0	0	1.13639	0	0	0.0851821	0.0163056	4.92264e-06	0	3.50147
ENSMODT00000000665.3	ENSMODG00000000539	PRKACB	1.21012	1.13112	0.802329	0.77811	0.523345	1.91454	0.56003	0.877855	0.203775	1.0333	0.41264	0.568419
ENSMODT00000000666.4	ENSMODG00000000542		13.264	5.92324	5.61972	2.84442	5.1036	12.6041	1.95413	6.79543	7.39781	10.4917	13.6868	13.6315
ENSMODT00000000668.3	ENSMODG00000000543		0.216704	0.0479183	0	0	0.0892871	0.0332124	0.0422184	0.183064	0.208461	0.25939	0.0522195	0.497415
ENSMODT00000000670.3	ENSMODG00000000541	ABCG8	35.9885	34.2566	15.8366	7.9057	11.1186	13.3478	14.6052	23.2385	33.1431	34.5351	49.0157	73.053
ENSMODT00000000671.3	ENSMODG00000000541	ABCG8	0.212488	0.209451	0.300673	0	0	0	0	0	0	1.80101	1.04547	0.911713
ENSMODT00000000674.4	ENSMODG00000000546		13.4172	11.9185	27.1868	18.6641	5.78871	18.9345	7.20517	10.1758	9.18397	14.5354	3.09066	8.67945
ENSMODT00000000675.4	ENSMODG00000000545	ELF3	68.6651	62.8573	41.9934	52.7879	64.8448	44.0389	45.0786	80.1851	146.387	92.5204	29.6278	40.2813
ENSMODT00000000676.2	ENSMODG00000000547		0	0	0	0	0	0.0267545	0	0.134754	0	0.0854611	0.0765901	0.0860957
ENSMODT00000000678.4	ENSMODG00000000550	ANGPTL5	0.0672177	0.069328	0	0	0	0.0362322	0	0	0	0	0.101	0.507697
ENSMODT00000000679.4	ENSMODG00000000549	PPARGC1A	0.525959	0.402266	2.26247	0.340065	1.91623	0.988597	0.165734	2.62561	4.82121	3.41103	1.05556	1.67134
ENSMODT00000000684.4	ENSMODG00000000554	CYFIP1	48.6096	48.5762	44.6449	21.7975	27.5225	29.5699	24.1572	57.7972	76.9282	62.6372	80.6939	71.7598
ENSMODT00000000685.3	ENSMODG00000000555	DPP10	6.42821	7.6822	0.0233545	0	0	0	0	0	0	0	6.88138	2.21914
ENSMODT00000000686.5	ENSMODG00000000557	POU4F2	0.0476357	0.0460006	0	0	0	0	0	0.0422448	0	0	0.0722457	0.160981
ENSMODT00000000687.4	ENSMODG00000000558		3.3785	2.22891	0	0.285204	0.409951	0.466046	0.221692	0.0362762	0	0.00480712	4.61291	3.74347
ENSMODT00000000688.4	ENSMODG00000000560	GBA3	0.0147661	0.0300049	0.0164304	0	0	0.0312506	0	0	0	0	0.0467556	0.157263
ENSMODT00000000691.4	ENSMODG00000000562	ARL8A	28.9088	30.3509	18.2362	10.3801	22.7716	12.9387	13.8469	13.6058	15.6501	15.911	12.8055	16.4879
ENSMODT00000000692.3	ENSMODG00000000561	ABCG5	0	0	0	0	0	0.11569	0	0.470095	0.887963	0.22457	0.337744	0.980222
ENSMODT00000000693.4	ENSMODG00000000564	PLAU	32.7843	28.4054	5.57107	5.08637	5.31919	15.7544	4.36219	35.1391	58.9453	50.7288	34.8598	11.368
ENSMODT00000000694.4	ENSMODG00000000565	NIPA2	12.1004	8.65018	23.4424	13.9311	41.7508	44.6728	30.1701	65.0368	76.4445	77.9197	30.4545	38.6974
ENSMODT00000000695.4	ENSMODG00000000566	LRRC2	0.0814777	0.0279305	0	0	0	0.201771	0.0362012	0.0942421	0.533026	0.40826	0.0815579	0
ENSMODT00000000696.4	ENSMODG00000000567	CFAP300	76.3501	46.8854	4.94085	11.2887	1.35802	0.947493	3.62785	1.99657	6.05413	4.26036	39.6493	59.92
ENSMODT00000000698.3	ENSMODG00000000569	ZYG11A	2.16281	0.00157775	1.13215	0.102231	7.22831	2.27218	0.00116667	13.2368	12.3914	11.1153	18.18	23.4459
ENSMODT00000000699.4	ENSMODG00000000568		1.4893	5.18957	0.771303	0.721833	0.143045	0.611694	2.01366e-10	0.365691	1.52739	4.8434	11.2437	21.9846
ENSMODT00000000700.4	ENSMODG00000000574	GPR37L1	7.62257	7.32355	0.282038	0.0907794	0.076033	0.211523	0.180666	0.26417	0.361544	0.0989833	4.18896	2.02061
ENSMODT00000000702.3	ENSMODG00000000572		197.566	233.903	115.71	114.373	48.414	90.8832	62.8069	53.1445	69.4528	65.9837	58.2869	136.497
ENSMODT00000000703.4	ENSMODG00000000573	TOP1	19.7542	20.1765	25.4155	5.00488	13.6393	10.19	13.68	23.7405	22.5233	22.84	30.6402	10.5942
ENSMODT00000000709.5	ENSMODG00000000578		11.1731	10.8714	10.8095	7.47806	8.15469	13.0741	8.65956	17.6512	25.6305	35.4583	9.84297	13.9366
ENSMODT00000000710.4	ENSMODG00000000581	NIPA1	0.717984	0.961922	3.00341	0.949153	1.08585	7.16609	3.14078	14.5074	11.9486	19.1597	4.73435	6.09786
ENSMODT00000000711.4	ENSMODG00000000582	ADGRA3	19.5281	23.6362	5.09078	1.37181	2.29344e-08	1.26324e-08	1.51943	6.14638e-10	3.46379	4.00968	15.6701	26.1038
ENSMODT00000000712.4	ENSMODG00000000580	TJP3	58.0781	54.1156	24.1349	26.3879	41.6007	23.2193	35.7624	41.8214	57.7401	37.2707	47.1879	66.2605
ENSMODT00000000713.4	ENSMODG00000000583	TTC29	78.8171	36.7904	4.51961	3.82184	3.70236	1.1826	1.97239	2.66599	3.36535	2.06761	62.9405	80.6534
ENSMODT00000000715.4	ENSMODG00000000556	ADGRB1	0	0	0	0	0	2.85038e-09	3.50805e-10	2.73269e-09	8.84791e-10	1.01939e-08	0	0
ENSMODT00000000716.2	ENSMODG00000000587		11.1478	9.84528	10.1628	3.54921	7.7513	4.10539	5.70009	11.3704	12.9669	11.4422	17.7126	25.9596
ENSMODT00000000720.4	ENSMODG00000000588	GPX7	18.152	23.2231	7.64125	3.84833	8.77166	7.26529	8.1462	5.04132	6.40301	12.8075	26.9745	18.5707
ENSMODT00000000721.3	ENSMODG00000000589		11.4144	10.7693	18.7326	4.66208	12.6007	7.19277	10.302	10.5641	19.2102	22.6499	17.5269	17.53
ENSMODT00000000730.4	ENSMODG00000000596	TTLL7	0	0	0.164606	0	0	0	0.0615053	0	0	0.407121	0	0
ENSMODT00000000731.4	ENSMODG00000000597	PTPN7	0.370001	0.136804	0.109978	0	0	0.10379	0	0.182176	0.0828812	0.172332	0.608016	0.568029
ENSMODT00000000732.3	ENSMODG00000000599	LRRC14B	0.0837948	0.108341	0	0	0.143484	0.0567115	0.0359154	0.328302	0.852775	0.089384	0.0401941	0.180686
ENSMODT00000000733.4	ENSMODG00000000598	APBA3	7.66338	6.74991	13.7048	6.98413	13.5117	9.20186	9.32113	14.8874	14.8181	12.7142	11.3288	11.3171
ENSMODT00000000735.2	ENSMODG00000000601		20.0255	24.6725	22.5517	6.51501	11.6501	5.86701	5.51026	13.1616	25.0764	22.4021	41.8245	33.0997
ENSMODT00000000736.2	ENSMODG00000000602		12.294	8.45522	34.7708	47.1398	8.02138	14.7706	14.1523	8.6911	23.3879	16.8366	10.0705	10.1685
ENSMODT00000000737.2	ENSMODG00000000603	HNRNPA2B1	474.355	601.021	550.092	376.781	237	238.139	287.127	467.029	522.589	449.894	959.498	1001.74
ENSMODT00000000741.4	ENSMODG00000000604	LRRC40	15.4853	17.7342	8.25363	4.80715	4.62683	4.87543	7.15875	10.5389	20.667	10.3691	29.7793	39.8743
ENSMODT00000000742.3	ENSMODG00000000607		0	0	0	0	0	0.0862529	0	0	0.539653	0	0	0.225736
ENSMODT00000000744.4	ENSMODG00000000608		53.1896	58.8565	108.565	53.7678	65.3303	33.9203	49.9529	84.194	97.764	70.7611	123.529	136.57
ENSMODT00000000746.3	ENSMODG00000000609		53.1677	73.6682	82.999	29.7954	29.5276	25.2246	19.1481	42.0087	64.5554	52.3274	154.914	106.805
ENSMODT00000000747.2	ENSMODG00000000610		0	0	0	0.0996601	0	0.370495	1.05894	0	0.404977	0	0	0
ENSMODT00000000749.4	ENSMODG00000000054		0.117854	0.0452044	0.109408	0.0775843	0	0.253609	0.0696688	0.369558	0.159273	0.273389	1.43472	1.27777
ENSMODT00000000751.4	ENSMODG00000000612		60.0329	62.6079	86.1922	35.5679	96.6738	80.4997	78.3092	120.404	102.439	102.866	102.217	102.362
ENSMODT00000000752.4	ENSMODG00000000614		0.383164	0.511248	0.0194737	0	0.100247	0.276274	0.0589527	0.385736	0.0599861	0.380673	0.284814	0.907815
ENSMODT00000000755.2	ENSMODG00000000617		0	0	0	0	0	0	0	0	0	0	0	0
ENSMODT00000000757.4	ENSMODG00000000618	TUT4	0.0927001	0.159107	0	0	0.494076	0.0626881	0	0	1.74718	0.962454	0.637532	2.51493
ENSMODT00000000758.4	ENSMODG00000000619	EIF2AK4	11.9516	11.7213	10.7608	5.3215	1.20237	2.10429	1.06848	3.37022	5.78681	5.44412	24.4784	21.3898
ENSMODT00000000761.4	ENSMODG00000000621	CYTH4	3.44532	2.45068	0.569675	0.46434	0.391477	0.608338	0.997441	0.604691	1.53174	3.23329	5.88452	5.49122
ENSMODT00000000762.4	ENSMODG00000000623		1.15153	1.20814	0.723128	0.583399	0.571112	0.838782	1.92184	3.05136	3.59576	2.16542	3.27964	5.09009
ENSMODT00000000763.3	ENSMODG00000000624		83.4813	97.2036	100.284	66.3618	79.558	56.9231	71.5869	99.4108	113.429	106.351	166.786	148.002
ENSMODT00000000765.4	ENSMODG00000000629	GPR176	2.07668	1.6225	1.86389	1.69729	0.572282	1.56235	3.03296	2.65872	2.51132	1.77891	1.5601	2.12243
ENSMODT00000000766.4	ENSMODG00000000627		0	0	0	0	0	0	0	0	0	0	0.0363587	0
ENSMODT00000000768.4	ENSMODG00000000626	PLCG1	10.1065	10.945	5.59247	1.01992	13.205	5.21354	6.62969	9.42322	11.385	8.41278	8.641	14.8304
ENSMODT00000000769.4	ENSMODG00000000628	SYT6	0	0.0595311	0.0223505	0.082717	0	0.184876	0	0.293301	0	0.069059	7.52572	10.9616
ENSMODT00000000770.2	ENSMODG00000000630		0	0	0	0	0	0	0	0	0	0	0	0
ENSMODT00000000771.2	ENSMODG00000000631	PDCD6	72.5034	86.116	94.661	118.469	95.0678	159.242	106.485	187.305	187.5	246.434	117.648	101.514
ENSMODT00000000774.4	ENSMODG00000000635	RAC2	10.4569	5.51751	1.0495	1.09964	1.0825	3.29608	2.99435	1.1625	4.36246	5.69233	9.03322	4.20155
ENSMODT00000000776.4	ENSMODG00000000636	ZHX3	13.2282	13.5507	12.4788	4.02903	14.6786	8.50911	7.66655	20.0907	28.3521	22.1152	23.0133	28.4734
ENSMODT00000000778.4	ENSMODG00000000633	VCL	45.3431	40.162	18.8166	9.87977	28.1379	70.2751	71.4093	90.1887	93.5771	108.414	110.663	84.1606
ENSMODT00000000780.4	ENSMODG00000000637	MATK	6.63332	6.58873	1.56317	2.52482	1.08805	1.26717	0.850241	0.935696	2.51048	1.42442	1.35132	3.58659
ENSMODT00000000781.4	ENSMODG00000000639	MMP20	0	0	0	0	0	0	0.030984	0	0.09641	0	0	0
ENSMODT00000000782.4	ENSMODG00000000641	PACRGL	32.9443	35.7099	22.3681	24.6443	14.3242	14.744	12.9866	31.2748	37.9217	37.9144	54.3315	64.6349
ENSMODT00000000783.4	ENSMODG00000000640		0.117256	0.11495	0	0.0993871	0.121367	0.239171	0.272691	0.292322	0.0948101	0.0397529	1.73158	1.37242
ENSMODT00000000787.4	ENSMODG00000000644	PRPF38A	19.4581	21.0202	14.7731	12.5941	10.2682	10.8005	10.5772	12.464	13.8127	13.6212	16.9767	15.361
ENSMODT00000000788.4	ENSMODG00000000665	HIPK1	30.0719	39.8066	16.5143	17.1617	0	15.7546	8.91371	6.99157	1.04476	5.82292	44.8323	24.0303
ENSMODT00000000790.4	ENSMODG00000000646	LGR6	0	0	0	0	0	0	0	0	0	0	0	0
ENSMODT00000000792.4	ENSMODG00000000649	LRRC7	0.0233198	0.191499	0	0	0	0.465736	0.151173	1.00771	3.6203	2.87395	0.0957216	0.248483
ENSMODT00000000793.3	ENSMODG00000000648	LRPPRC	28.3365	39.6454	35.6585	23.1754	16.7542	23.4579	17.9918	37.7566	56.594	36.284	138.697	70.1462
ENSMODT00000000794.4	ENSMODG00000000650	C1QTNF6	8.8256	9.81555	4.99698	4.98529	0.467452	8.49268	1.81768	7.01544	12.3421	18.005	24.3078	14.9235
ENSMODT00000000795.4	ENSMODG00000000651	PTP4A3	24.6565	22.036	13.6726	6.03328	7.95299	28.3949	12.6293	25.8346	22.5971	29.4333	12.1132	18.0793
ENSMODT00000000797.4	ENSMODG00000000652	UBE2T	5.70669	12.1439	1.19528	2.18306	1.14615	2.11724	2.8235	2.22333	1.68374	2.60478	11.7639	18.1044
ENSMODT00000000802.4	ENSMODG00000000655		1.30162	1.27084	5.28782	1.77653	3.24491e-09	2.83145e-09	0.364853	3.36667e-09	1.53348e-09	0	3.05855	2.2704
ENSMODT00000000805.4	ENSMODG00000000657	LYPD1	0.734519	0.834815	0.537909	0.510082	0.608423	0	0	0.716533	0.324367	0.135072	1.46936	0.820961
ENSMODT00000000807.4	ENSMODG00000000658	EDNRA	24.5327	26.0034	5.21179	1.52515	2.72162	5.60756	2.57536	7.72861	5.89907	3.31403	67.1879	64.1941
ENSMODT00000000809.3	ENSMODG00000000661	EXOC3	44.4604	47.7844	49.1473	30.3909	22.7879	20.612	25.447	45.1828	55.068	42.4106	66.5006	65.3757
ENSMODT00000000810.4	ENSMODG00000000662	PPP1R12B	1.06925	1.33307	0.708637	0	0	0.640234	0.238057	0.790902	0.257466	0	1.6542	1.55511
ENSMODT00000000811.4	ENSMODG00000000663	SLC45A4	6.09051	6.58797	4.13361	0.255166	13.7277	35.4225	4.17494	78.7537	106.051	148.799	8.17757	14.9701
ENSMODT00000000812.3	ENSMODG00000000664		0	0	0	0	0	0	0	0	0.158132	0.26764	0.237523	0
ENSMODT00000000813.4	ENSMODG00000000665	HIPK1	36.9251	21.1639	43.1162	0	88.5835	30.2542	15.9351	68.146	66.2695	59.9193	31.188	88.5219
ENSMODT00000000814.4	ENSMODG00000000667		2.06284	1.34453	0.286745	0.361834	0	6.30675	0.390053	0.137287	0.363584	0.726128	3.51417	1.74778
ENSMODT00000000817.3	ENSMODG00000000671		0	0	0	0	0	0	0	0	0	0	0	0
ENSMODT00000000818.3	ENSMODG00000000669	MMP27	0.499527	0.0295288	0.260841	0.641693	1.79294	2.4588	2.43233	6.32732	3.60377	2.05052	0.47151	0.192229
ENSMODT00000000820.4	ENSMODG00000000670	TMEM184C	89.2592	97.9905	87.3958	65.6665	129.843	85.1393	92.3745	153.175	198.597	163.459	163.553	169.548
ENSMODT00000000822.4	ENSMODG00000000672	DCLRE1B	5.53877	5.66372	7.05283	6.65698	5.21453	4.30425	4.70113	6.01245	8.14686	7.43136	4.57189	6.50883
ENSMODT00000000825.4	ENSMODG00000000675	ZFR2	6.68406	8.17426	1.0996	0.629131	0.137166	0.132415	0.201252	0.404622	0.975432	1.02348	23.0102	14.2941
ENSMODT00000000828.2	ENSMODG00000000678		23.4999	21.5556	23.206	13.5563	24.2226	11.3157	18.3336	28.3266	35.8617	18.9259	25.1196	24.8476
ENSMODT00000000829.2	ENSMODG00000000681		0	0	0	0	0	0	0	0	0	0	0	0
ENSMODT00000000830.4	ENSMODG00000000680	SLC9A3	0	0	0.0388524	0	0.0856996	0.0342586	0	0	0	0.0281122	0	0.454917
ENSMODT00000000832.4	ENSMODG00000000679	THBS1	8.54181	6.17064	3.4067	0.323875	4.78673	17.8537	5.42985	27.7773	49.5118	63.1999	17.5359	17.498
ENSMODT00000000835.4	ENSMODG00000000684	SYT2	0.312625	0.208143	0	0	0	0	0	0	0	0	0.984941	3.0495
ENSMODT00000000836.2	ENSMODG00000000685		0	0.102109	0	0	0	0	0	0	0.147936	0	0	0
ENSMODT00000000841.4	ENSMODG00000000687	ADK	10.4161	23.9824	7.26673	3.44217	6.08909e-08	45.4662	14.4501	101.523	59.4025	90.2862	43.8064	25.9408
ENSMODT00000000842.3	ENSMODG00000000686	DEPDC1	0.61757	2.22715	0.703643	0.381558	0.296391	0.634134	0.735885	0.288209	0.352241	0.185068	1.42085	6.12555
ENSMODT00000000843.4	ENSMODG00000000689		9.63236	21.7074	46.7675	48.6368	69.72	36.8087	60.968	29.9312	28.8277	46.2012	54.1605	69.3129
ENSMODT00000000845.4	ENSMODG00000000691	PRMT9	16.8335	17.6365	12.3523	9.47811	6.26267	5.54285	5.37498	13.1404	19.4133	14.596	32.4938	39.911
ENSMODT00000000847.4	ENSMODG00000000690	MGAT5	3.04025	4.12298	4.03385	0.189012	9.64997	5.35567	2.98864	17.5967	17.603	20.3318	11.1936	12.0103
ENSMODT00000000848.3	ENSMODG00000000694		0	0	0	0	0	0	0	0	0	0	0.351189	0
ENSMODT00000000849.1	ENSMODG00000000692	MMP8	0	0	0.105302	0.0360628	0.499893	0.165523	0.292221	0.323434	0.488956	0.518153	0.0931567	0.104228
ENSMODT00000000852.4	ENSMODG00000000693	TMPRSS6	0	0	0.0307757	0	0	0	0	0	0.333341	0	0	0
ENSMODT00000000853.4	ENSMODG00000000696	ATCAY	0.434483	0.290102	0.663796	0.794387	0	0.169626	0.163916	0.35855	0.418045	1.68847	0.726873	0.942481
ENSMODT00000000856.4	ENSMODG00000000699	AP4B1	6.68702	6.19002	6.74498	1.99531	10.8099	4.11205	3.05374	11.3491	20.4947	12.3716	18.0763	20.4841
ENSMODT00000000857.4	ENSMODG00000000700	OCA2	0	0	0	0	0	0.255081	0.0616045	0.566842	0.0981992	0.0856947	0.200748	0.0455992
ENSMODT00000000859.3	ENSMODG00000000701	TPPP	21.0274	11.8221	37.3408	12.6994	14.8648	2.03426	6.0623	3.91936	8.91254	3.25353	28.5085	55.1324
ENSMODT00000000861.4	ENSMODG00000000704	TMEM163	5.30208	8.18576	38.0508	31.2726	74.3134	0.826968	15.4841	0.641959	1.54987	1.04213	2.66407	2.03952
ENSMODT00000000863.3	ENSMODG00000000705	SLC3A1	0.676275	0.594864	0.932685	0.357369	11.7578	26.3586	5.36504	32.0638	13.0439	8.88768	1.315	1.73687
ENSMODT00000000864.4	ENSMODG00000000706	BCL2L15	2.11014	1.7464	0.22111	0.352096	0.218521	2.16642	0.735208	1.00053	0.721001	1.16035	15.0228	26.7826
ENSMODT00000000866.4	ENSMODG00000000707		22.8147	22.02	33.0166	13.3768	13.883	14.0137	13.0581	27.4415	32.4764	27.0394	49.9968	38.988
ENSMODT00000000867.3	ENSMODG00000000708		7.41538	10.3302	1.05406	0	0	0.491568	1.09481	0.740466	1.32003	1.01176	7.0045	11.4347
ENSMODT00000000868.3	ENSMODG00000000709	NMRK2	0.0229737	0.0223933	0	0.0240256	0	0.023036	0.0583619	0.198824	0.180917	0.644708	0.0683481	0.0766868
ENSMODT00000000871.4	ENSMODG00000000710	RPE65	0	0	0	0	0.170487	0.117902	0.280349	0.122079	0	0.104284	0	0.220104
ENSMODT00000000873.4	ENSMODG00000000712	MMP1	9.42575	2.69516	0.777258	0.26851	2.44506	25.9579	4.51028	16.3254	266.93	162.098	142.538	102.459
ENSMODT00000000875.4	ENSMODG00000000713	ADGRL2	3.5879	3.97612	1.2332	0.0265087	0	0.606349	0.182037	4.71008	4.21617	3.0039	4.24307	0.269807
ENSMODT00000000878.2	ENSMODG00000000716	MPST	49.7641	50.9672	16.7046	16.3978	23.1511	25.4317	30.9004	23.0908	34.8956	30.9782	50.4817	38.1093
ENSMODT00000000880.4	ENSMODG00000000719		0.876127	0.872317	0.190058	0.0969199	0	0.447085	0.5719	1.07105	0	0.228396	2.46107	2.42148
ENSMODT00000000881.4	ENSMODG00000000721		2.14816	1.35037	1.65587	2.42929	1.25514	1.92512	1.16387	1.01959	1.3999	1.30588	0.790799	1.67375
ENSMODT00000000882.3	ENSMODG00000000724	TST	152.2	135.613	3.78139	9.8313	25.8043	75.2969	104.766	40.4362	14.2258	15.0489	53.7923	58.0294
ENSMODT00000000883.5	ENSMODG00000000720	CHD6	13.4189	15.2061	8.09567	0.649966	9.19498	3.72108	3.37413	19.5055	23.9619	13.5251	44.4962	41.6861
ENSMODT00000000885.3	ENSMODG00000000714		4.00146	4.465	3.571	0.0484496	1.29815	0.444593	0.476342	1.66034	3.44366	2.02863	10.8293	8.33209
ENSMODT00000000886.3	ENSMODG00000000723	OSBPL3	0.0953638	1.46817	10.6933	4.9313	48.7516	11.8206	15.3151	15.9091	12.892	22.7822	6.57198	8.02047
ENSMODT00000000889.3	ENSMODG00000000726		1.17959	0.942944	1.04229	1.29988	4.36471	1.47309	1.8187	3.52741	9.38219	3.72804	9.90368	9.66199
ENSMODT00000000890.3	ENSMODG00000000725		0.318392	0.0621985	0.0345971	0	0	0	0	0.0522987	0	0	0.134352	0.151879
ENSMODT00000000892.4	ENSMODG00000000727		20.281	21.8088	27.2982	6.04629	16.2004	7.85883	9.42105	29.3774	48.7475	27.2541	59.7186	61.9043
ENSMODT00000000893.4	ENSMODG00000000728	GSDME	1.35012	1.33516	0.592688	0.104062	0.107355	1.19158	0.379159	1.30574	0.289268	0.409311	0.6514	1.00357
ENSMODT00000000898.4	ENSMODG00000000730	CC2D1B	19.5574	20.6656	6.60602	5.52962	21.6884	18.783	19.0474	25.1349	30.8387	30.5464	14.9463	20.9264
ENSMODT00000000899.4	ENSMODG00000000731	SLIT2	0.629061	0.91975	0	0.000505404	0.00355094	0.203436	0.00292107	0	0	0	0.571767	0
ENSMODT00000000900.4	ENSMODG00000000734	MMP3	2.03756	0.0486886	0	0.0558031	0	0.278354	0.190816	0.425734	23.5553	9.06171	9.95994	5.61482
ENSMODT00000000902.3	ENSMODG00000000735	PREPL	5.39037e-09	0.460872	0	0.142923	1.87839	0.285119	0.918389	2.95325	2.15606	1.68412	2.57465	1.95631
ENSMODT00000000905.6	ENSMODG00000000736	KAT6B	8.99812	10.0622	5.32425	1.16211	3.68043	0.883453	1.1012	3.29667	4.04739	3.76941	14.7678	15.8227
ENSMODT00000000908.4	ENSMODG00000000742	RSBN1	11.2972	12.3718	5.6897	0.43898	4.55587	2.97549	1.20178	8.21939	12.0897	10.1249	25.411	24.7293
ENSMODT00000000911.4	ENSMODG00000000744		9.53225	7.11619	3.40623	1.49506	6.33088	5.75545	3.16901	11.1583	16.3446	28.1232	23.695	16.3607
ENSMODT00000000912.3	ENSMODG00000000745	NPY	0	0	0	0	0	0	0	0	0	0	0	0
ENSMODT00000000915.3	ENSMODG00000000747	CAMKMT	0.000589046	0	0	1.03105	1.05339	0	0	0	0	0	0	0
ENSMODT00000000917.4	ENSMODG00000000748	AGO2	3.64788	4.27505	3.57749	0.207204	2.28516	1.95933	0.813927	4.27743	5.02797	9.20867	8.85853	6.16597
ENSMODT00000000919.3	ENSMODG00000000750	EEF2	2507.86	2515.12	1581.62	1089.13	1224.48	851.635	775.272	1268.09	1103.99	965.168	2550.42	2285.13
ENSMODT00000000920.4	ENSMODG00000000753	SIX3	0	0	0	0	0	0	0	0	0	0	0	0
ENSMODT00000000923.4	ENSMODG00000000754	WLS	70.6279	65.0503	19.571	18.8717	10.3385	98.0183	71.2542	73.6356	80.7699	97.0929	71.2759	66.6434
ENSMODT00000000924.4	ENSMODG00000000757	LCORL	4.65353	6.14757	6.59542	0.483602	3.71336	2.97612	1.748	5.92735	9.29397	8.80204	13.0929	22.5209
ENSMODT00000000925.3	ENSMODG00000000755	KDM5B	19.255	26.9256	30.7517	0.00656959	16.8174	1.64819	0.26868	25.5896	10.9577	3.67027	8.0019	24.4528
ENSMODT00000000926.4	ENSMODG00000029236	ZFYVE9	3.16968	3.83299	0.868252	1.73629	1.24975	3.71352	3.67662	4.08409	2.84693	1.95112	2.0121	2.50688
ENSMODT00000000927.2	ENSMODG00000000761	SIX2	0	0.0269051	0	0.0784672	0	0.20496	0	0.0736894	0.293689	0.454537	0	0.279983
ENSMODT00000000929.4	ENSMODG00000000762	DUSP13	0	0	0	0	0	0.0824851	0.0526943	0	0	0	0	0
ENSMODT00000000933.4	ENSMODG00000000764	KCNK9	0.025252	0.0237089	0	0	0	0	0	0	0	0.124777	0	0.0428782
ENSMODT00000000934.4	ENSMODG00000000765	PIAS4	0.0039246	5.18725	4.04242	3.30278	24.4047	2.03209	6.25316	33.9342	34.6397	27.3545	28.248	34.4077
ENSMODT00000000935.3	ENSMODG00000000766		0	0	0	0	0	0	0	0	0	0	0	0.211128
ENSMODT00000000936.3	ENSMODG00000000768		19.6959	25.0305	55.1629	22.8864	45.2789	292.575	54.4271	123.604	119.993	88.2068	64.9634	73.4374
ENSMODT00000000937.4	ENSMODG00000000767		0	0	0	0	0	0.0310509	0	0	0	0	4.14989	0.0993233
ENSMODT00000000938.4	ENSMODG00000000770		8.44353	11.0529	7.32567	5.57352	11.4081	3.29644	4.8278	17.6082	14.0966	12.8209	26.2124	16.5726
ENSMODT00000000939.4	ENSMODG00000000769	NCF4	2.69844	2.05344	0.480928	0.533156	0.730769	1.83841	2.02669	2.31405	2.57771	5.35668	2.21532	1.24553
ENSMODT00000000940.1	ENSMODG00000000771	GNG12	108.698	116.706	35.6141	9.48034	91.3579	279.628	200.725	87.2297	79.039	96.8416	30.2313	37.6548
ENSMODT00000000942.3	ENSMODG00000000774		14.6936	14.0315	9.79926	9.26301	11.1275	7.35215	10.6413	7.13946	6.32039	7.7372	7.40559	7.5483
ENSMODT00000000946.4	ENSMODG00000000777	STK31	0	0	0	0	0	0	0	0	0	0.269412	0	0.94588
ENSMODT00000000948.3	ENSMODG00000000778	ZBTB7A	14.4948	13.8271	29.2227	2.29755	34.4861	15.8954	10.635	32.3819	25.2144	27.071	21.2285	25.1695
ENSMODT00000000953.4	ENSMODG00000000783		0.0796079	0.0777602	0	0	0	3.7746	0.203215	3.42499	7.21899	16.1702	0	0
ENSMODT00000000955.4	ENSMODG00000000787	CCDC126	2.08232	1.82333	0.473233	0.253401	0.26986	0.335009	0.464305	0.715534	1.55945	1.28321	3.37822	4.95885
ENSMODT00000000956.1	ENSMODG00000000788	GADD45A	14.6519	9.28439	85.5974	106.912	1559.42	511.137	789.192	511.507	402.728	286.307	8.52315	17.7476
ENSMODT00000000957.4	ENSMODG00000000785		2.52987	1.44711	0.51182	0.258005	0.361122	0.11752	0.179959	0.002079	0.50314	0.582745	4.11822	9.68462
ENSMODT00000000960.4	ENSMODG00000000790	IFT27	46.5147	30.7315	4.34032	7.07298	4.9807	8.39275	4.8795	6.30832	12.5965	13.7596	28.6713	37.3877
ENSMODT00000000967.4	ENSMODG00000000794	MMP13	0.762194	0.147783	0.190801	0.0841685	0.130857	0.127817	0.0968092	0.390737	0.147759	0.166775	27.5003	158.185
ENSMODT00000000973.4	ENSMODG00000000800	BRD9	3.87614	4.41605	35.2406	23.106	3.78226	3.31046	3.61597	3.45226	4.27189	3.56315	6.35206	5.14608
ENSMODT00000000975.4	ENSMODG00000000802	SERBP1	94.964	100.831	57.9686	57.8237	41.2447	45.5928	39.8489	35.2157	37.3127	33.7249	62.2393	65.2245
ENSMODT00000000976.4	ENSMODG00000000805		0	0	0	0	0	0.055046	0	0.164242	0	0	0.0709959	0.397331
ENSMODT00000000978.3	ENSMODG00000000807		3.71844	2.34792	0.420286	0.129995	4.35941	0.27638	1.67852	1.247	6.55189	1.34487	3.00947	7.79801
ENSMODT00000000979.4	ENSMODG00000000804	FAM184B	0.508	0.570323	3.59583	0.987927	0	0	0.0175702	0.0460213	0.390898	0.398755	2.37004	2.19935
ENSMODT00000000980.3	ENSMODG00000000796		0	0	0	0	0	0.329385	0	0.77459	0.205037	1.27102	0	0
ENSMODT00000000981.4	ENSMODG00000000803	PHTF1	84.0427	55.7013	38.2557	28.2835	13.2907	30.5257	19.2068	42.5181	44.2506	49.3321	104.468	163.737
ENSMODT00000000983.3	ENSMODG00000000809		42.0011	48.9821	109.146	18.2415	47.9798	37.119	29.6205	54.3392	39.1198	44.2772	26.5401	50.0024
ENSMODT00000000984.3	ENSMODG00000000810		0.158202	0	0	0	0	0	0	0	0	0	0.0971258	0
ENSMODT00000000987.3	ENSMODG00000000813	MED28	74.2144	83.8029	38.1101	54.8671	18.0927	39.8935	24.1618	35.3125	54.3496	40.7785	46.3128	50.5486
ENSMODT00000000988.2	ENSMODG00000000814		0	0	0.88696	0.617191	13.9563	0	1.28923	31.3049	61.6534	37.3855	6.69379	6.96884
ENSMODT00000000992.3	ENSMODG00000000817	CREB3L3	0.373198	0.563586	0.503798	0.737697	1.26547	3.87963	1.53524	3.89544	3.0627	6.67541	1.48436	1.64495
ENSMODT00000000993.4	ENSMODG00000000818	TRIP13	8.86983	10.8022	2.22245	1.47804	1.3379	2.76132	1.87168	4.05716	5.99366	4.27235	17.2208	13.1818
ENSMODT00000000996.4	ENSMODG00000000820	MFSD14B	32.6397	35.2397	22.865	19.7296	14.3633	27.8627	14.3336	40.0905	50.6109	43.1019	44.5727	44.8819
ENSMODT00000000997.4	ENSMODG00000000821	EIF3D	410.624	416.759	207.312	164.931	181.318	117.027	117.101	142.275	184.028	159.116	445.078	353.398
ENSMODT00000000998.3	ENSMODG00000000822	SRBD1	11.7467	11.7411	5.0353	3.23735	6.1728	2.72639	1.42503	8.84923	14.7363	5.96616	16.9236	20.1907
ENSMODT00000000999.3	ENSMODG00000000824	DCUN1D5	30.7253	40.2063	48.2452	60.2728	29.6032	41.6923	39.9082	53.9003	66.9749	76.7345	46.9886	44.603
ENSMODT00000001002.3	ENSMODG00000000809		19.6559	15.9683	17.1218	16.7823	15.1587	14.3848	16.1903	15.9996	18.5118	17.9808	13.0572	15.4132
ENSMODT00000001003.4	ENSMODG00000000828	NKD2	6.18419	6.35713	2.25405	0.841631	1.70088	2.89914	1.32153	3.15063	1.66033	1.59663	12.7514	11.7529
ENSMODT00000001004.3	ENSMODG00000000829		0	0	0	0	0	0	0	0	0	0	0	0
ENSMODT00000001006.4	ENSMODG00000000830		3.08425	3.80107	3.94018	0.710018	0.614574	2.07524	0.126542	1.42379	3.66741	3.57738	7.09588	7.74136
ENSMODT00000001009.3	ENSMODG00000000833	FOXRED2	6.87069	7.18395	1.8163	0.941636	3.19348	3.03365	1.79912	3.44228	4.25926	4.19765	8.72829	7.99994
ENSMODT00000001011.4	ENSMODG00000050046	PIBF1	8.45296	9.31588	1.41501	1.10697	1.47943	1.91247	1.84758	4.96267	5.94514	4.65741	19.2007	21.178
ENSMODT00000001012.4	ENSMODG00000000835	RAB3GAP1	37.2528	38.6044	67.9693	30.2737	29.7523	17.5919	17.5356	40.5333	52.906	37.7588	78.8786	74.9489
ENSMODT00000001014.3	ENSMODG00000000837		0	0.191475	0	0	0	0	0	0.6696	0.327207	0	0	0
ENSMODT00000001015.3	ENSMODG00000042134		1.24814	0	0.265864	0.608234	0	1.0799	0	1.12505	1.23721	1.36586	1.90411	2.92835
ENSMODT00000001016.2	ENSMODG00000000841	YJU2	24.1905	23.2375	12.4188	10.6469	14.8582	10.8642	14.2391	16.4739	17.1257	13.7067	22.5305	18.4396
ENSMODT00000001019.4	ENSMODG00000000840	GABRA5	0.0405794	0.122829	0	0	0	0.0851665	0	0	0	0	0.784458	0.456193
ENSMODT00000001025.3	ENSMODG00000000887		0	0	0.508531	1.33471	0	0.0598652	0	0	0	0	0.153542	0
ENSMODT00000001026.4	ENSMODG00000000846	PRPSAP2	26.966	31.323	22.2448	22.872	69.8787	20.3305	54.3847	38.7802	39.4584	28.306	28.4115	26.0135
ENSMODT00000001027.4	ENSMODG00000000845		1.57476	1.17932	2.12924	4.16163	1.59048	1.08891	0.951576	0	1.63272	1.44726	1.88885	3.31008
ENSMODT00000001028.3	ENSMODG00000000847		0	0	0	0	0	0	0	0	0	0	0	0
ENSMODT00000001032.4	ENSMODG00000000851	KLF5	108.366	111.174	81.8411	41.624	99.9376	129.35	173.515	245.085	199.641	193.072	111.379	157.061
ENSMODT00000001033.4	ENSMODG00000000925	DYNC2H1	5.06616e-07	2.72092e-09	0	0.236414	1.55869e-08	1.89414e-05	0.517079	0.00773296	0.000427496	0	2.3589e-10	0.000234992
ENSMODT00000001035.4	ENSMODG00000000848	ZRANB3	0	0.105952	0	0	0.138585	0	0	0	0	0	0	0
ENSMODT00000001039.3	ENSMODG00000000862		0.861261	0.459582	0	0.269999	0	0.220655	0	0.15412	0	0	2.29014	0.365551
ENSMODT00000001040.4	ENSMODG00000000859		0.0102129	0.0290318	0.0109113	0.00978816	0	0	0.0521523	0	0	0	0.0818376	0.091077
ENSMODT00000001041.4	ENSMODG00000000855	KLHL12	0	0.234636	0	0	0	0	0	0	0	0	0	0
ENSMODT00000001042.4	ENSMODG00000000853		0	0	0	0	0.486172	1.68727	0.762081	1.96869	3.16274	2.225	0	0.341185
ENSMODT00000001044.3	ENSMODG00000000861	LAP3	97.0608	114.351	163.324	95.9847	196.896	108.278	139.767	175.523	268.034	207.128	151.686	153.783
ENSMODT00000001045.3	ENSMODG00000000847		1.70636	0	0	0	0.487456	0	0.0659329	0	0	0	0.153799	0
ENSMODT00000001047.4	ENSMODG00000000863	KLF12	1.89427	1.63914	0	0.0918826	0.137647	0	0	0.493412	0.0676915	0.111146	1.54353	3.68744
ENSMODT00000001049.4	ENSMODG00000000866	FOXK1	10.8485	13.2969	7.00555	0.376524	6.74926	3.64796	1.34649	8.65688	13.0754	12.603	15.558	17.4163
ENSMODT00000001051.3	ENSMODG00000000867	CLRN2	0	0	14.0767	3.25582	0.862282	0	0	0	0	0.132516	0	0
ENSMODT00000001055.4	ENSMODG00000000868		0	0.0775014	0	0	0	0	0	0.209243	0.292073	0	0.113683	0.142954
ENSMODT00000001058.3	ENSMODG00000000869	TRBV30	0	0.26695	0	0	0	0	0	0	0	0.404226	0	0
ENSMODT00000001059.4	ENSMODG00000000873	SAMD8	5.00314	3.08116	1.21138	0.802716	2.2633	3.75588	3.10253	6.05156	6.17099	12.3542	7.22081	5.17408
ENSMODT00000001061.4	ENSMODG00000000877		0	0	0	0	0	0.0213835	0.0819044	0.0372953	0	0.104874	0.0639989	0.106917
ENSMODT00000001062.2	ENSMODG00000000876	ADIPOR1	56.2637	52.5609	254.315	141.642	105.611	71.9482	75.4839	99.0563	108.854	100.375	54.1395	62.192
ENSMODT00000001064.4	ENSMODG00000000874	MAGI3	0.449429	0.719449	0.59694	0	0	0.0824211	0.0408449	0.98429	0.806387	0.337516	0.985094	1.30329
ENSMODT00000001070.3	ENSMODG00000000879		47.8573	55.9264	104.023	62.3065	44.5587	19.054	29.6449	23.9143	25.2819	25.2102	44.1589	36.8634
ENSMODT00000001072.3	ENSMODG00000000881	FSD1	0.166689	0.180418	0	0.0231891	0	0.178817	0.0594631	0.367181	0.667883	0.325457	0.444476	0.684512
ENSMODT00000001076.4	ENSMODG00000000885	FAM135B	0.078755	0.128358	0	0	0	0.0937313	0.0240223	0.170931	0.17458	0.00665326	0.0250844	0.302245
ENSMODT00000001077.2	ENSMODG00000023883		10.1163	14.6862	20.2279	10.4935	48.6485	16.1445	8.67579	18.5965	27.7996	19.0388	41.6952	35.9309
ENSMODT00000001082.3	ENSMODG00000000892		0.287572	0	0	0	0	0	0.127925	0	0	0	0.110706	0
ENSMODT00000001084.4	ENSMODG00000000891	AP5Z1	0.206494	0	0.387207	0.271061	0	0.120866	0	2.28772	3.53592	2.34925	2.88496	2.86262
ENSMODT00000001085.3	ENSMODG00000000893		0	0	0	0	0	0	0	0	0	0	0	0
ENSMODT00000001086.3	ENSMODG00000000894	CYB5R1	18.1834	19.2011	30.1444	27.4819	38.956	10.0932	15.0063	19.4196	28.2484	24.752	22.6957	19.1189
ENSMODT00000001087.2	ENSMODG00000025240		13.9904	20.3819	12.6393	11.0488	20.7883	18.5195	20.4209	25.7945	44.6333	47.0891	27.8127	20.5749
ENSMODT00000001089.3	ENSMODG00000000896	VDAC2	84.6668	112.709	130.516	117.868	82.7264	79.117	85.8136	126.229	120.845	136.057	152.248	136.27
ENSMODT00000001092.3	ENSMODG00000000899		0	0	0.0521756	0	0	0	0.125795	0	0.0878136	0.148213	0.132564	0
ENSMODT00000001094.4	ENSMODG00000043520	VN2R510	0.015123	0.0562894	0.0455372	0	0.0889004	0.0149887	0	0.198326	0.178423	0.284911	0.145293	0.100793
ENSMODT00000001095.3	ENSMODG00000000901		0.260878	0.0654972	0	0	0	0	0	0	0	0	0	0
ENSMODT00000001099.2	ENSMODG00000000904		0	0	0	0	7.07874	0	0.529419	7.40118	16.0263	15.9585	16.9649	22.3482
ENSMODT00000001100.5	ENSMODG00000000906	COMTD1	8.43744	15.6077	0.952951	0.834111	6.8881	17.9729	6.86458	6.29752	7.09303	9.20221	7.44198	3.95887
ENSMODT00000001101.4	ENSMODG00000000905	SLC6A19	0	0.0147498	0	0	10.9757	16.4903	2.02077	16.4932	0.613853	1.00642	0.0463407	0.104254
ENSMODT00000001102.3	ENSMODG00000000907	MPND	14.4901	12.967	25.7253	18.07	17.9887	15.876	26.1106	20.2611	19.4238	18.8038	13.1172	14.7926
ENSMODT00000001104.2	ENSMODG00000000908	LRIG2	2.34668	2.03459	1.0493	0	0.946505	0.434378	0.399089	2.83241	3.78153	1.90375	6.47186	9.59487
ENSMODT00000001106.4	ENSMODG00000000910	LDB2	29.6516	34.2559	9.55806	6.20849	2.6764	20.2779	5.14164	19.8124	11.1473	12.8365	41.2037	26.8949
ENSMODT00000001107.2	ENSMODG00000051396		0	0.17291	0	0.0111798	0	0	0	2.52062	2.89966	3.0262	1.96826	2.75405
ENSMODT00000001109.4	ENSMODG00000000912	ADGRL4	6.97533	6.90062	4.21663	1.48381	2.9258	14.666	2.20723	21.996	27.1684	37.0047	16.0035	19.1727
ENSMODT00000001113.4	ENSMODG00000000915	TMEM183A	14.2982	13.3379	49.6265	39.0775	46.3075	23.4223	34.1186	33.1377	29.5418	26.1501	19.0077	27.29
ENSMODT00000001116.3	ENSMODG00000000919		0.384376	0	0	0	0	0.886439	0.161951	1.18535	0.678927	0.286689	1.39854	0.716843
ENSMODT00000001118.4	ENSMODG00000000916	LRBA	12.2885	14.5008	25.5196	1.4367	11.1707	8.08864	4.38254	20.2595	25.7228	21.8168	30.0731	34.029
ENSMODT00000001119.4	ENSMODG00000000921	SLC6A18	0.030186	0.0154266	0.0171878	0.0201429	0.078002	0.190228	0.118054	0.261708	0.280653	0.115126	0.286318	0.249934
ENSMODT00000001120.4	ENSMODG00000000922	DEUP1	1.25049e-09	0.557646	9.4049e-09	0	0	0	0	0	0	0	0	0
ENSMODT00000001123.4	ENSMODG00000000923	R3HDM1	0	0	0	0	0.00482467	0	0.000237205	0	0	0	0	0
ENSMODT00000001127.4	ENSMODG00000000925	DYNC2H1	6.91614	6.73571	0.658789	0.00197507	0.879273	0.776196	0.00479089	2.35055	3.91705	4.17805	17.8121	21.8572
ENSMODT00000001128.4	ENSMODG00000000927		0.991931	0.265065	0.0242332	0.0506206	0	0.459245	1.18638	0.689324	1.04231	5.18526	1.15408	0.593449
ENSMODT00000001129.4	ENSMODG00000000928		3.72163	3.32023	3.58477	0.634724	1.31522	1.45237	0.40092	2.48079	1.69246	4.42425	3.05668	5.461
ENSMODT00000001130.4	ENSMODG00000000929	SLC16A1	28.9826	45.7156	48.6086	9.73558	259.761	869.192	937.263	2426.08	1260.4	1719.61	80.0095	50.1056
ENSMODT00000001131.4	ENSMODG00000000930	TAPT1	14.0625	14.3824	27.2673	6.85466	39.9344	13.2351	14.4594	32.2086	26.1947	21.9834	21.5251	26.2117
ENSMODT00000001133.4	ENSMODG00000000931	SH3GL1	33.6865	34.5674	43.9267	17.0614	23.9826	23.8891	22.2252	27.6084	25.5815	21.8929	34.1277	34.4694
ENSMODT00000001134.3	ENSMODG00000023103		1.89308	3.13553	2.11596	2.03307	0	1.7415	0.670782	0.509993	0.9706	4.1491	2.0564	2.93541
ENSMODT00000001135.4	ENSMODG00000000933	MMD2	0	0	0	0	0	0	0	0	0	0	0.0660312	1.17986
ENSMODT00000001137.3	ENSMODG00000000936		6.78473	3.03436e-09	2.25154e-08	3.90362	2.01434	3.2981	0.0119766	1.95745	0.000640421	16.8042	2.78477	1.58386
ENSMODT00000001138.4	ENSMODG00000000935	ATP10A	13.8961	14.5308	7.83015	0.563278	5.7483	0.416689	0.633041	1.01563	4.32504	1.40724	14.904	13.8056
ENSMODT00000001139.4	ENSMODG00000000934	OSBPL9	51.713	59.33	30.9447	16.6862	38.0333	20.2706	20.5681	37.0625	45.7863	43.3384	64.3013	53.0892
ENSMODT00000001141.3	ENSMODG00000000938		0.318317	0.233534	0	0.0834799	0	0.0810756	0	0.319621	0.730572	0.828758	1.37448	1.55554
ENSMODT00000001144.4	ENSMODG00000000937		1.49409	1.18986	0.704458	0.505388	1.62677	1.9439	1.66926	1.30695	1.354	1.19498	0.160001	0.179001
ENSMODT00000001149.4	ENSMODG00000000942	PDGFD	10.0171	14.5517	4.32409	1.28182	0	17.8149	1.70223	21.8156	18.4286	19.3808	16.2795	17.561
ENSMODT00000001151.3	ENSMODG00000000945	FCRLB	1.11481	0.363651	0.221756	0.200162	0.545454	0	0.044216	0.296158	0.404277	0.111629	0.151905	0.283497
ENSMODT00000001152.4	ENSMODG00000000944		129.15	116.043	148.883	130.958	184.373	99.2834	236.678	192.767	167.419	151.007	159.571	200.224
ENSMODT00000001154.3	ENSMODG00000000946		0	0	0	0	0	0	0	0	0	0	0	0
ENSMODT00000001157.4	ENSMODG00000000950	CHAF1A	3.27033	8.01243	0.719354	0.468062	0.650184	0.788041	1.24264	1.75574	0.510823	0.474778	17.1843	17.5869
ENSMODT00000001160.3	ENSMODG00000000953		50.2627	40.557	17.6017	2.174	77.1698	131.181	33.0676	136.161	75.3577	126.753	33.8908	30.0873
ENSMODT00000001169.3	ENSMODG00000000957	SLC36A4	7.46801	13.7858	27.1253	9.07174	11.5541	7.30053	0.167305	43.5986	38.7196	57.5927	46.018	51.6956
ENSMODT00000001171.4	ENSMODG00000000962	DUSP12	11.059	13.724	12.5496	10.1865	4.45891	10.3158	5.51331	11.6587	11.2327	14.8176	11.931	10.3672
ENSMODT00000001174.3	ENSMODG00000000965	RHOQ	41.957	45.7585	23.3385	8.49042	34.3527	13.8005	13.1268	21.6654	22.7422	13.7459	41.8654	64.3927
ENSMODT00000001175.3	ENSMODG00000000967		44.5079	40.1486	24.2369	21.434	42.4907	44.0656	41.489	65.4188	54.8589	58.1593	39.255	45.3182
ENSMODT00000001176.5	ENSMODG00000000964	TBC1D4	6.84763	6.87486	1.49913	0.521514	0.625538	7.34718	1.96742	12.6641	11.204	18.1212	14.9133	20.1712
ENSMODT00000001179.2	ENSMODG00000000968	PIGF	0.139305	0.311819	1.51016	3.14194	0	0.318145	1.05068	1.01208	0	0	0.582119	0
ENSMODT00000001180.3	ENSMODG00000000969	RPS3A	6018.73	6316.08	2325.08	3040.54	1332.11	1173.34	1308.85	1020.85	1873.54	1683.68	4719.9	4168.58
ENSMODT00000001183.3	ENSMODG00000000973	CRIPT	56.9106	63.815	61.6122	41.3679	31.2878	45.4357	38.5604	59.1027	69.4977	61.7333	84.1223	92.1275
ENSMODT00000001186.3	ENSMODG00000000975	KHDRBS3	12.2757	22.7961	1.12739	0.987816	0.724888	3.52185	4.70502	4.30359	0.946567	1.7818	12.6439	10.6906
ENSMODT00000001190.3	ENSMODG00000000978		0	0	0	0	0.557072	0	0	0.173388	0	0.111761	0.207559	0
ENSMODT00000001192.4	ENSMODG00000000979	SLC29A4	0.586323	0.0369314	0.469618	0.414749	0.419427	1.6342	4.76303	2.49259	0.360139	0.990208	0.180159	0.201584
ENSMODT00000001193.4	ENSMODG00000000980	ATF6	12.219	9.34865	61.6205	14.6193	53.0308	10.1098	11.7517	20.8431	31.9925	15.8856	20.2102	20.311
ENSMODT00000001194.3	ENSMODG00000000981		44.3831	35.543	33.8835	22.73	133.314	26.7852	42.9211	72.8963	80.8749	97.3849	42.2399	40.9266
ENSMODT00000001196.3	ENSMODG00000000984	B9D1	5.43731	0	2.56993e-06	5.10309	15.0762	15.8888	6.74565	0.389511	3.98081	1.63312	0.00642991	3.74283
ENSMODT00000001198.4	ENSMODG00000000983	EPHB6	12.3418	8.65208	20.8095	20.4642	9.78256	16.1071	26.5535	22.9871	42.1419	29.8487	20.3766	30.82
ENSMODT00000001199.3	ENSMODG00000000986	PHAX	41.0378	45.0123	19.5108	9.13466	14.7268	17.5904	7.5081	27.7729	38.272	34.0835	57.1575	61.5365
ENSMODT00000001202.3	ENSMODG00000000989	MCM6	31.0613	50.2177	4.42657	3.37349	6.15755	11.1352	7.67596	9.55706	9.48986	13.1465	77.7836	44.5876
ENSMODT00000001203.4	ENSMODG00000000987	PROM1	7.17961	3.43092	0.532271	0.493412	8.22334	59.8282	22.5416	95.2146	98.3243	132.713	5.00703	5.98384
ENSMODT00000001205.4	ENSMODG00000000991	CLPTM1L	22.8275	25.2913	193.91	74.123	105.392	30.1505	47.572	52.8464	52.9816	47.6877	31.2224	39.7609
ENSMODT00000001207.4	ENSMODG00000000990	UCHL3	0.145843	0	0.280012	0	0	0.141161	0.398667	0.857587	0.679473	0.326779	0.490128	0.69768
ENSMODT00000001208.5	ENSMODG00000000994	TNRC18	35.4348	37.2968	13.555	3.23152	15.6128	15.4659	10.0399	25.1334	22.7446	18.5915	16.1264	32.1193
ENSMODT00000001209.3	ENSMODG00000000992		0	0	0	0	0	0	0	0	0	0	0	0
ENSMODT00000001210.4	ENSMODG00000000995		20.9193	18.255	0.871669	1.20352	0.588604	7.74807	1.59936	5.03599	6.40748	3.71634	15.0572	10.7165
ENSMODT00000001211.4	ENSMODG00000000997	SH3D19	10.447	9.56348	3.08984	0.16905	5.44909	6.27603	2.27868	6.66274	14.5543	9.13437	19.3866	19.8536
ENSMODT00000001213.4	ENSMODG00000000999	FBXL18	3.36439	3.61593	4.20649	1.96321	3.56895	2.95635	2.28669	3.96014	4.93655	4.76319	8.94071	7.55396
ENSMODT00000001215.4	ENSMODG00000000996	PPFIA4	0.23151	0.140874	0.0363428	0.0324554	0	0.0224572	0	0.135818	0.190189	0.11559	0.423204	0.598837
ENSMODT00000001217.4	ENSMODG00000001001	ALDH7A1	45.2825	59.2106	87.1985	30.0235	24.7171	24.2054	15.6396	43.4303	68.0865	59.074	96.6954	106.755
ENSMODT00000001220.4	ENSMODG00000001004	CNGA3	0	0	0	0	0	0	0	0	0	0	0	0
ENSMODT00000001221.4	ENSMODG00000001002	DLG5	6.5517	5.63304	4.69251	0.712207	5.11652	3.06584	1.55195	2.2333	3.03306	4.44224	2.65354	5.69685
ENSMODT00000001226.4	ENSMODG00000001007		0.569583	0.517874	25.8023	1.54292	77.2833	1.93925	8.77758	1.97501	1.76127	2.82059	2.09736	2.11654
ENSMODT00000001227.3	ENSMODG00000001009	MYOG	0.17458	0	0	0	0	0.0732659	0	0.0432372	0	0	0	0.166374
ENSMODT00000001228.4	ENSMODG00000001008	MOV10	3.63082	3.28952	0.244049	0.115123	1.40683	0.633406	0.368733	1.07146	1.26191	1.45293	3.04491	7.66326
ENSMODT00000001230.3	ENSMODG00000001011	MCFD2	26.3278	27.9681	159.531	66.9746	89.7796	27.8403	35.4437	49.9612	63.8296	69.3031	75.5011	64.1162
ENSMODT00000001231.1	ENSMODG00000001012	MTNR1B	0.600252	3.88494	25.3704	21.3019	0	0.0863622	0.16465	0.206536	0	0.196625	1.4749	0.330667
ENSMODT00000001232.4	ENSMODG00000001013	NOS1AP	3.14744	3.6688	1.18031	0.447471	14.7975	2.10812	2.16951	4.18765	3.04423	2.85918	3.35811	6.23704
ENSMODT00000001234.4	ENSMODG00000001016		1.70693	1.56712	2.45169	2.49973	37.9893	1.06479	2.36256	1.47868	3.01602	5.37534	0.905632	2.32187
ENSMODT00000001235.4	ENSMODG00000001017	BST1	0.408917	0	2.04713	4.09749	0	1.98014	0.829284	2.77813	3.99307	10.945	1.39407	1.01434
ENSMODT00000001236.3	ENSMODG00000001019	SPATA46	0	0	0.0656111	0	0	0	0	0.381998	0	0	0	0
ENSMODT00000001237.4	ENSMODG00000001020		0.646842	0.526406	0	0	0	0	0	0.0850803	0	0	0	0.131474
ENSMODT00000001238.3	ENSMODG00000001022		2.30762	1.23042	12.6768	9.73879	2.69704	0.772001	0.597483	1.06249	2.49565	3.93096	3.45719	3.77399
ENSMODT00000001239.4	ENSMODG00000001021	FAM160A1	2.64191	1.66144	4.67831	1.01529	15.6048	2.14238	4.67539	7.4749	8.53805	8.56328	2.96008	5.35165
ENSMODT00000001240.4	ENSMODG00000001018	TRPV6	4.61024	2.29982	26.7547	28.3701	22.3305	8.47113	26.3392	12.1477	62.3046	54.3662	7.98327	7.92277
ENSMODT00000001241.3	ENSMODG00000001024		0	0	0	0	0	0	0	0	0	0	0	0
ENSMODT00000001243.3	ENSMODG00000041912		1.67079	2.24987	2.19971	0	1.51891	1.1026	0.240374	9.32515	10.0806	5.14386	4.68217	14.7608
ENSMODT00000001244.4	ENSMODG00000001014	IGF2BP3	0.211769	0.0859497	0.0687288	0.161054	1.66606	11.2891	2.10084	11.9376	7.893	13.346	0.194865	1.08886
ENSMODT00000001245.4	ENSMODG00000001026	TNFAIP8L1	66.3461	40.478	12.459	11.7393	14.9989	5.11236	9.59835	9.8965	6.6651	7.58098	45.5163	69.8582
ENSMODT00000001246.2	ENSMODG00000001027	GRAMD2B	1.33292	1.47954	11.7527	8.36787	1.66363	5.02684	2.76593	10.3202	9.79633	8.34911	7.78656	10.3889
ENSMODT00000001247.4	ENSMODG00000001028	FSCN1	8.32423	11.8009	4.83884	0.839593	3.46739	15.2916	2.20124	10.1086	7.44548	9.14677	5.06882	7.37038
ENSMODT00000001248.4	ENSMODG00000001030		11.1589	13.3501	13.4733	24.1125	29.0754	6.75546	11.1737	5.95227	8.03724	8.91997	6.60333	8.65573
ENSMODT00000001249.4	ENSMODG00000001031	GATB	10.5539	11.8372	15.1685	10.9348	4.50029	5.98368	7.57825	7.52948	6.20018	8.53741	4.40498	6.25696
ENSMODT00000001250.4	ENSMODG00000001029	SGIP1	0.647817	0	0	0	0.372766	0	0	0	0	0	0	3.22286e-10
ENSMODT00000001251.3	ENSMODG00000001039	DPP9	179.515	188.048	593.33	537.485	287.665	157.267	181.718	153.596	127.8	135.852	94.2909	117.961
ENSMODT00000001255.3	ENSMODG00000038786		0	0	0.0799866	0	0	0	0	0.468529	0	0.505133	0.871894	1.24584
ENSMODT00000001257.4	ENSMODG00000001036	POLR3A	5.52992	6.05931	6.0076	1.43775	5.42309	2.19591	1.84271	6.15351	8.8848	6.26715	16.0518	15.1996
ENSMODT00000001260.4	ENSMODG00000001040	MYBPH	0.229116	0.195682	0.0242966	0.0876407	1.58921	0.112616	0.0862852	1.25172	1.1513	0.917627	1.48816	0.505556
ENSMODT00000001262.3	ENSMODG00000001041	TTC7A	0	0.50342	0.990495	0.0938485	4.80223e-09	0.235546	0	0	0.447565	0	0	0
ENSMODT00000001263.3	ENSMODG00000001044		0	0	0	0	0	0	0	0	0.828021	0	0.833123	0
ENSMODT00000001265.4	ENSMODG00000001039	DPP9	10.2562	9.77046	10.4967	2.80915	18.4683	10.451	8.98941	14.8555	15.3032	14.0879	16.4112	18.5455
ENSMODT00000001267.4	ENSMODG00000001046	GPNMB	5.6519	3.07115	0.157991	0.114198	0.486055	1.25281	0.426819	1.69092	2.15195	3.42887	30.3808	6.06749
ENSMODT00000001268.4	ENSMODG00000001048		5.2107	4.24431	9.21328	1.91364	2.55731	5.79777	4.57769	12.8923	10.908	14.4261	7.91697	13.0822
ENSMODT00000001269.3	ENSMODG00000001050		15.2879	8.05723	2.50535	2.51021	0.486829	0.774266	0.491266	0.979291	2.49382	2.20539	7.04794	9.38807
ENSMODT00000001270.4	ENSMODG00000001049	TRPV5	0.0118703	0	0.474248	1.71207	0.53567	2.6952	2.88005	2.90456	3.68145	5.45189	0.227261	0
ENSMODT00000001274.4	ENSMODG00000001052		7.81474	10.932	7.3818	0.486828	8.54087	4.8286	3.19208	12.6031	11.3782	10.1009	22.9305	23.4225
ENSMODT00000001276.3	ENSMODG00000001054		0	0	0.0290922	0	0.647107	0	0.0350593	0	0	0.123582	0	0
ENSMODT00000001278.4	ENSMODG00000001056	DARS1	91.5556	107.042	140.037	101.773	96.1122	54.9573	62.6428	96.4837	123.942	114.612	129.932	124.104
ENSMODT00000001279.2	ENSMODG00000001058	FEM1A	13.6511	11.1583	4.37864	1.54011	7.08034	4.20797	3.21366	5.69349	7.35272	5.55696	11.6651	10.7776
ENSMODT00000001280.3	ENSMODG00000001059	CALM2	692.116	665.956	580.07	561.267	272.517	337.808	356.984	345.482	636.609	752.595	1247.18	1438.11
ENSMODT00000001283.4	ENSMODG00000001060		2.6282	2.5318	5.25157	2.72758	2.79064	4.10424	2.14902	7.91547	6.31969	6.23272	4.24142	7.10029
ENSMODT00000001286.2	ENSMODG00000001061		0.321094	0.344551	0.0415838	0.0380588	0	0.437797	0.612743	0.708519	0.293796	0.122458	1.2128	0.433097
ENSMODT00000001287.4	ENSMODG00000001062	FBXW7	1.12502	0.0265798	0	0.0111131	0.14268	0.0100133	0.00789331	0	0.00164409	1.47015	1.10729	0.551762
ENSMODT00000001288.2	ENSMODG00000001063		7.28699	6.95503	23.1847	5.56425	12.0084	2.56417	3.3321	9.43452	12.5283	8.19062	17.6402	12.9767
ENSMODT00000001291.4	ENSMODG00000001064	FBXL5	17.7283	16.6222	20.4235	10.8226	23.3334	14.4858	14.494	32.3861	41.1939	37.9429	47.4787	47.4405
ENSMODT00000001294.4	ENSMODG00000001065	CHI3L1	2.14919	3.66158	0.116116	0.0382944	1.14454	1.01885	2.61221	4.43183	28.8129	21.3159	5.7942	2.56756
ENSMODT00000001296.4	ENSMODG00000001067	KEL	0.10178	0.197328	0.422172	0.567261	1.4495	3.47883	1.63262	12.1584	6.77324	6.1128	0.0197628	0.356573
ENSMODT00000001297.4	ENSMODG00000001068	ZFAT	1.78129	2.33189	2.36216	0	3.35277	0.774137	0.618123	1.11115	0.699286	1.578	2.0122	1.22894
ENSMODT00000001299.3	ENSMODG00000001071	TIGD4	0.150811	0.122308	0.273677	0	0	0.095345	0.120193	0	0	0.0994742	0.0449281	0.0501254
ENSMODT00000001300.3	ENSMODG00000001070	TMEM131	12.1491	19.1868	29.5988	7.53653e-07	5.79015	2.84172	0.585078	6.84693	11.3757	9.18977	12.1808	9.06883
ENSMODT00000001303.4	ENSMODG00000024345		0	0	0.0380681	0	0.176774	0.0363095	0.0906629	0.191454	0	0.217915	0	0
ENSMODT00000001304.4	ENSMODG00000001072	PDE4B	16.8378	11.0259	1.80627	0.822452	11.023	3.19433	1.92708	7.70391	6.79993	5.21116	14.3439	11.4014
ENSMODT00000001305.4	ENSMODG00000001074	MAPK7	42.2889	46.7647	4.48462	4.71145	13.2095	8.86704	8.13129	11.9258	14.3624	10.8992	32.6372	31.4967
ENSMODT00000001307.4	ENSMODG00000001075	KLHL7	11.2967	11.5542	6.08802	6.37281	12.6792	10.7708	9.18933	21.2871	27.3785	29.0902	25.9745	20.3477
ENSMODT00000001308.2	ENSMODG00000001077	EPCAM	210.153	224.389	383.365	369.711	255.993	69.8974	168.133	140.926	288.324	202.757	236.89	243.908
ENSMODT00000001310.4	ENSMODG00000001079	SMURF1	13.1211	7.94395	8.30541	0	13.2094	15.2434	6.37035	25.5102	35.0496	26.6757	23.3519	33.2756
ENSMODT00000001311.3	ENSMODG00000001080		7.16996	8.62617	0.162836	0.409152	0.57328	1.66591	1.3878	2.74478	7.47182	3.93206	2.58444	3.81319
ENSMODT00000001316.4	ENSMODG00000001078	MYH9	125.446	122.582	43.2068	13.4453	81.2602	133.144	70.2417	169.644	169.175	226.827	116.499	152.291
ENSMODT00000001317.3	ENSMODG00000001084	UAP1	20.0165	17.2435	64.0087	44.9053	33.8206	6.03961	13.7691	17.7709	35.0821	26.8734	41.1547	54.4421
ENSMODT00000001319.4	ENSMODG00000001085	MFAP4	29.483	31.4284	3.39929	2.71239	1.232	3.08486	2.78677	1.7039	2.96163	0.70177	36.7812	15.94
ENSMODT00000001320.4	ENSMODG00000001084	UAP1	1.66543	2.84862	22.668	6.95308	7.46252	3.47818	2.64634	2.04606	3.80754	5.14977	3.37924	12.5992
ENSMODT00000001321.4	ENSMODG00000001087	ARFIP1	27.8497	27.197	58.2363	17.7681	17.9671	15.1069	10.1852	36.0798	47.5339	42.5237	62.6608	56.1523
ENSMODT00000001322.3	ENSMODG00000001088	ST3GAL1	19.3698	22.7342	3.34159	1.28734	139	13.6143	45.0895	68.9512	35.6783	28.8643	38.6889	49.2577
ENSMODT00000001325.2	ENSMODG00000001090		0	0	0	0	0	0	0	0	0	0	0	0
ENSMODT00000001327.4	ENSMODG00000001093	KPNA7	0	0.041546	0	0	0	0	0	0	0	0.313207	0.436334	5.98688
ENSMODT00000001328.4	ENSMODG00000000524	GGA1	1.08391	1.15686	0	0.118572	3.57781	0	0	15.1691	15.6272	14.2099	5.24981	9.11598
ENSMODT00000001331.3	ENSMODG00000001094	FMOD	1.47089	0.58982	0	0	0	0.0244241	0.0311581	0.0864545	0	0	0.963006	0.623152
ENSMODT00000001333.4	ENSMODG00000001096	FAM126A	5.79132	6.2312	6.34124	2.88975	2.94406	2.11917	1.72717	6.04556	3.98112	3.02633	8.41271	11.0544
ENSMODT00000001335.4	ENSMODG00000001045	ZNF608	9.10703	10.2336	0.815225	0.424552	1.00091	2.53364	1.36232	6.46358	9.06622	7.34817	10.949	12.4027
ENSMODT00000001336.3	ENSMODG00000001098		26.3025	31.163	14.0809	8.42038	4.58714	10.2543	10.341	23.1643	37.493	25.7391	73.3207	58.9141
ENSMODT00000001339.3	ENSMODG00000001103		0.0807107	0.321945	0	0	0	0.168877	0.106438	0.242636	0	0.230336	0	0.23483
ENSMODT00000001341.3	ENSMODG00000001105	PRELP	88.9597	71.6057	13.781	2.11543	8.2094	20.3059	10.318	20.8512	15.313	8.37697	92.7909	60.7085
ENSMODT00000001342.4	ENSMODG00000001102	CC2D2A	9.55655	8.12477	2.21816	1.17437	6.48754e-07	1.0875	0.657016	3.12322	5.79967	7.7928	29.9682	32.3818
ENSMODT00000001346.4	ENSMODG00000001099	LMO7	0.235239	0.193726	0.123099	0.2425	0	0.0407639	0.156622	0.252416	0.566441	0.178946	0.672145	0.744225
ENSMODT00000001347.3	ENSMODG00000001106	KCNK12	7.67721	2.37648	0.109091	0	0	0.0682834	0	0	1.62827	0.212035	4.00739	7.94215
ENSMODT00000001349.3	ENSMODG00000001108	UHRF1	16.5576	28.5182	1.88765	1.02636	4.36438	18.5035	12.8335	44.3403	23.1889	20.6227	85.7447	53.9805
ENSMODT00000001350.4	ENSMODG00000001109	NDRG1	211.417	208.291	502.324	406.842	289.465	109.716	134.945	184.365	442.075	344.719	216.527	247.38
ENSMODT00000001353.5	ENSMODG00000001112	FHDC1	2.41248	2.87114	2.00222	0.810966	1.69111	5.19761	2.53251	5.86668	7.43874	8.96255	2.59982	6.11543
ENSMODT00000001355.4	ENSMODG00000001113	OPTC	0	0	0	0	0	0	0	0.137101	0	0	0	0
ENSMODT00000001359.4	ENSMODG00000001116	ZMIZ1	26.2175	24.1685	3.74974	0.341175	33.9135	13.6071	6.51408	29.9058	30.5786	32.02	13.9931	20.019
ENSMODT00000001364.3	ENSMODG00000001121		1.28819	3.29381	2.09009	4.28079	0.791889	9.93351	5.37127	3.20014	2.60255	2.98817	0.59981	0
ENSMODT00000001365.3	ENSMODG00000001122	RBFOX2	16.594	13.5767	2.1348	3.00569	18.6792	6.8652	5.39297	31.787	57.3447	31.4681	94.265	97.8684
ENSMODT00000001368.4	ENSMODG00000001125		3.62189	2.37268	1.09158	0.494198	1.64442	2.04713	0.751765	1.90964	3.08128	2.26248	4.44314	8.68492
ENSMODT00000001370.4	ENSMODG00000001127		0.178734	0.0977709	1.20997	0	3.96149	0.369672	0.418394	1.59419	1.78045	1.48182	0.399614	1.19771
ENSMODT00000001371.3	ENSMODG00000001128	PPIF	34.2946	14.4353	77.6814	46.1115	27.9272	300.562	18.317	38.5093	26.3453	77.8689	11.8913	26.7744
ENSMODT00000001372.3	ENSMODG00000001129	MSH6	79.5869	79.3044	24.1643	15.7665	21.192	21.9574	23.1463	34.9426	53.6987	36.9341	88.9752	106.389
ENSMODT00000001376.4	ENSMODG00000001131	THSD7B	0	0	0.0104464	0	0	0	0	0	0	0	7.85494e-08	7.07531e-07
ENSMODT00000001378.4	ENSMODG00000001134	ZCCHC24	4.45197	4.78189	14.8244	5.30401	3.51579	9.00453	22.8961	16.7428	17.8278	13.293	14.0667	19.0207
ENSMODT00000001380.4	ENSMODG00000001136	MND1	2.35403	5.38896	4.73745	6.99541	0	2.81174	3.94986	2.48182	3.39647	3.14344	6.69591	7.81818
ENSMODT00000001383.4	ENSMODG00000001137	ATP2B4	3.86892	4.35269	2.49383	0.325851	0.315863	1.19545	0.469283	0.919111	0.683626	0.310362	16.3985	11.3116
ENSMODT00000001385.2	ENSMODG00000001141	ACOD1	0.0314484	0	0	0	0.162878	0	0	0.0531661	0	0	0.185873	0.153335
ENSMODT00000001386.4	ENSMODG00000001139	RASGRP1	2.3865	0.011677	0.277333	0	0.581875	0.501257	1.37356	3.07527	3.27857	6.22698	3.64445	4.45626
ENSMODT00000001388.3	ENSMODG00000001143	FBXL3	54.4555	63.3991	134.272	167.693	33.0748	31.9502	39.7279	32.8722	105.57	44.8667	106.906	95.9035
ENSMODT00000001391.4	ENSMODG00000045528	PTPRS	9.11154	9.59352	1.20417	0.614912	0	1.45751	0.295067	0.560141	0.478653	0	3.9569	6.55708
ENSMODT00000001392.4	ENSMODG00000001146	TMEM254	74.6286	70.9886	48.3062	59.1372	4.99475	38.1473	26.9175	28.4622	36.8055	45.9602	42.1858	51.3103
ENSMODT00000001393.3	ENSMODG00000001148		0	0.0791224	0	0	0	0	0	0	0	0	0	0
ENSMODT00000001398.4	ENSMODG00000001149	CPEB2	0.231584	0	3.7446e-10	0.331495	0.0108803	1.49869	1.28387	0.292388	0.817503	1.80706	0	3.82952e-10
ENSMODT00000001401.6	ENSMODG00000001152	MCM5	16.3282	37.3554	3.36599	2.55006	9.23856	5.80344	6.46102	5.0599	11.2762	5.86129	26.6309	22.7459
ENSMODT00000001404.3	ENSMODG00000001155		0.0433493	0	0	0	0	0	0	0	0	0	0	0
ENSMODT00000001405.4	ENSMODG00000001151	DDR2	7.60638	6.56427	1.34711	1.92361	0.302716	9.95966	4.16394	0.0305157	8.83298	4.41871	10.1263	8.16391
ENSMODT00000001407.2	ENSMODG00000001147		0	0	0	0	0	0	0	0	0	0	0	0
ENSMODT00000001408.4	ENSMODG00000001143	FBXL3	18.9567	20.0829	18.5773	4.0994	23.5655	10.6328	12.1125	23.8272	21.0354	16.7448	25.1848	29.9169
ENSMODT00000001412.3	ENSMODG00000001159	FAM98B	31.7206	39.4681	32.332	11.319	15.9176	13.9984	7.85033	32.1292	42.0586	35.3518	81.3991	76.113
ENSMODT00000001413.2	ENSMODG00000001160	FBXO11	54.9385	54.4803	20.711	6.9264	29.1525	16.1823	13.7127	31.2853	41.462	31.5485	48.1029	55.0572
ENSMODT00000001417.3	ENSMODG00000001163		26.8695	24.4841	5.13867	6.38248	139.597	159.763	105.121	408.37	218.162	156.065	34.0562	33.9212
ENSMODT00000001418.4	ENSMODG00000001164	SLA	1.99596	1.44503	0.37846	0.151755	0.751603	0.797358	0.59391	0.625528	0.928298	1.56581	3.5923	2.83003
ENSMODT00000001422.4	ENSMODG00000001161	LEPR	0.637381	0.221284	0.0101631	0	0.0485923	0	0	0	0	0	1.13823	0.487361
ENSMODT00000001423.3	ENSMODG00000001162	ST7L	0	9.70208e-05	0	0	5.0099	0	0	0.00384147	0	2.17737	0.75954	0.283413
ENSMODT00000001430.3	ENSMODG00000001169	FOXN2	21.1169	22.8954	40.7911	1.84885	15.0996	4.56043	3.94102	16.5327	22.3229	11.9358	32.6614	32.7212
ENSMODT00000001433.3	ENSMODG00000001173	HSD17B7	20.1058	22.4125	13.7533	13.124	12.1625	19.9377	11.0766	21.9825	21.3619	27.5903	29.6343	28.1923
ENSMODT00000001435.4	ENSMODG00000001174		0.111759	0.0744964	0.0414571	0.083254	0.818007	0.0386055	0	0	0.0671658	0	0.305321	0.401215
ENSMODT00000001438.5	ENSMODG00000001177	BMS1	19.127	22.9768	11.6016	7.12969	7.63822	11.3445	8.3094	26.4653	32.5472	25.6491	66.3529	50.8669
ENSMODT00000001440.4	ENSMODG00000001178	SAFB2	14.2199	13.6883	6.39052	6.12948	2.3744	7.1476	9.83601	15.6697	34.054	15.7863	39.3031	32.9669
ENSMODT00000001442.5	ENSMODG00000001180		17.8306	21.6139	9.13531	2.60639	7.81124	6.09899	4.48606	13.9073	21.0846	17.1331	37.8354	40.0818
ENSMODT00000001444.4	ENSMODG00000001183	SFRP2	227.89	141.025	1.203	3.73324	2.06882	19.8758	15.0471	1.9373	8.39337	4.38984	151.648	58.7094
ENSMODT00000001445.3	ENSMODG00000001181		0	0	0	0.0529092	0.253848	0.0510958	0.128966	0.151675	0.430906	0	0	0
ENSMODT00000001446.4	ENSMODG00000001185	RNF11	0.619737	6.14015	0.0125046	4.55687e-07	73.1919	0.133508	0.472117	65.2221	66.5635	62.1025	55.1672	57.6104
ENSMODT00000001447.3	ENSMODG00000001186	PPP1R21	0	0	0	0	0	0.646249	3.88461	0	0	6.18874e-10	0	0
ENSMODT00000001449.4	ENSMODG00000001182	INPP4A	10.6164	12.0038	1.92353	0.558519	4.03301	9.13209	2.80108	14.7543	9.94347	8.2453	27.7039	17.2273
ENSMODT00000001450.4	ENSMODG00000001184		19.8887	21.6854	16.2729	4.04915	17.8504	8.84063	8.96143	31.5052	55.384	21.5633	73.8776	81.6121
ENSMODT00000001451.4	ENSMODG00000001188		5.24925	4.79873	5.34268	1.31998	4.57199	2.76169	3.30555	3.69419	9.70336	5.96359	15.293	14.8491
ENSMODT00000001453.3	ENSMODG00000001189		0	0.574581	0	0	0	0	0	0.262512	0	0	0.26281	0.833677
ENSMODT00000001457.3	ENSMODG00000001191	RGS4	17.4077	11.323	2.24534	1.57366	0.877321	10.7258	2.7986	8.04803	12.0326	13.1836	32.2134	19.5873
ENSMODT00000001458.4	ENSMODG00000001192	SOX13	40.5476	38.9808	22.4445	9.49916	11.1923	12.4689	11.9354	15.5831	20.1127	19.492	25.0943	38.3651
ENSMODT00000001462.3	ENSMODG00000001196	WNT2B	8.18084	7.85107	0.442119	0.333443	0	0.208173	0.115242	0.163748	0.999813	0.805036	5.65783	7.2982
ENSMODT00000001465.5	ENSMODG00000001199		0.430238	0.436794	0.229676	0	5.05326	0.238746	0.833113	0.148612	0.0423277	0.0707993	0.179319	0.222317
ENSMODT00000001466.3	ENSMODG00000001201	NXPH2	0.123458	0.140912	0.0196381	0.00413271	0.454209	0.599787	0.183018	1.52348	1.04459	1.57278	1.44966	1.62232
ENSMODT00000001471.4	ENSMODG00000001204	DNAJC6	4.23162	3.7835	0	0	0	0.761833	0.0142182	0	1.15496	0	4.31535	3.28121
ENSMODT00000001472.4	ENSMODG00000001198		0.128007	0.0905013	0.0374577	0	0.241108	0.281269	1.50127	1.54138	0.371551	1.11722	2.41841	4.61117
ENSMODT00000001473.4	ENSMODG00000001207	LRRC6	6.22371	3.64257	1.60684	0.357214	0	0.270521	0.203868	0.4782	0	0	6.84056	9.46745
ENSMODT00000001474.4	ENSMODG00000001208	RGS5	370.394	356.01	63.2106	11.4122	21.6001	124.882	34.1972	217.888	272.5	193.637	2374.85	1282.36
ENSMODT00000001475.4	ENSMODG00000001209	UNC50	14.9797	17.2708	28.2958	20.5318	30.6067	16.3399	14.9447	48.1441	61.7973	51.1607	46.3802	32.1486
ENSMODT00000001478.2	ENSMODG00000001210	ETNK2	2.15397	1.25871	0.886712	0.335852	3.81983	1.67376	2.18849	7.27949	3.35186	4.55024	6.02224	5.17132
ENSMODT00000001481.4	ENSMODG00000001212	RET	3.9715	4.87003	0.532196	0.166729	0.187898	0.000895414	0.0788136	0.235388	0.354986	0	6.87162	5.09631
ENSMODT00000001484.4	ENSMODG00000001213	KCNQ3	1.15938	0.766731	0.122452	0.136429	0	0.189708	0.0480003	0.292618	0.811146	0.123913	0.615183	1.68921
ENSMODT00000001485.4	ENSMODG00000001215	PLRG1	28.4434	32.4003	19.4077	22.6535	14.1581	15.4475	17.8975	31.116	40.6436	35.1156	53.0755	61.4045
ENSMODT00000001486.2	ENSMODG00000001216		80.1356	99.1669	151.59	171.262	240.495	115.755	179.466	87.4503	88.9837	75.317	41.9922	42.7725
ENSMODT00000001487.4	ENSMODG00000024499		1.07575e-05	6.44968e-05	2.07727e-05	0	2.88641	2.17439e-08	0	9.12693e-08	0	0	1.65317	6.67076
ENSMODT00000001488.4	ENSMODG00000001217		0.168286	0.157764	0.0900647	0	5.20344	32.0935	106.844	45.0572	11.0949	17.4355	0.237625	0.824938
ENSMODT00000001489.3	ENSMODG00000001218		16.9819	18.0132	32.0865	11.7521	16.2623	10.7706	12.4097	29.9044	45.1757	40.0692	36.7695	48.7689
ENSMODT00000001491.3	ENSMODG00000001219		0.513199	0.528565	0.0926787	0.0941205	0	1.91611	0.589946	3.98114	2.95256	3.69224	0.825888	1.43402
ENSMODT00000001494.4	ENSMODG00000001223		39.1152	38.7514	17.8587	17.7088	24.8138	21.9328	13.8349	29.3643	38.8226	38.676	43.7194	60.5101
ENSMODT00000001495.4	ENSMODG00000001220		86.7033	74.9124	98.9358	147.715	123.431	50.0802	155.147	68.9822	87.1591	73.2252	49.6042	73.3778
ENSMODT00000001499.3	ENSMODG00000001226		87.7378	68.5659	38.4433	19.7854	170	22.412	33.8241	57.7277	56.2982	26.1762	70.0532	70.88
ENSMODT00000001500.3	ENSMODG00000001225	GADD45G	0.665757	0.314613	0.487337	0.803189	0	0.625953	0.824621	0.586329	0.785551	1.58188	5.26037	5.03431
ENSMODT00000001504.4	ENSMODG00000023561		1.24335	1.7817	1.2151	0.474555	0.920616	0.893947	0.744367	1.44219	1.70288	1.78489	2.02423	3.22359
ENSMODT00000001507.5	ENSMODG00000001228	MYBL2	0.0884267	0.389015	0.0923647	0	0.385023	0	0	0.174969	0.253072	0	1.7805	0.979238
ENSMODT00000001508.4	ENSMODG00000001231		0.0854398	0	0	0	0	0	0	0.133259	0.151125	0	0.172213	0.25761
ENSMODT00000001509.4	ENSMODG00000001232	CSGALNACT2	14.3647	16.9005	9.16491	1.88887	2.78739	53.5631	2.93123	68.3186	55.9205	90.0368	32.9641	38.1917
ENSMODT00000001515.4	ENSMODG00000001238	PBX1	0.727181	1.31676	0.450505	0	2.0137	0.121173	0	0.206119	1.23555	0	1.65087	0.876572
ENSMODT00000001516.3	ENSMODG00000001236	SAFB	73.3801	81.5817	49.4194	29.9978	38.4652	34.1871	33.5966	84.8403	126.246	82.7195	219.614	193.012
ENSMODT00000001517.4	ENSMODG00000001239	FGB	0	0	7.08794e-08	0	42.1765	252.491	33.5598	230.817	82.8461	132.941	5.37289e-07	2.01842e-06
ENSMODT00000001518.3	ENSMODG00000001240		0	0	0	0	0	1.18527	0	0.230734	0.750662	0	8.36835	11.1788
ENSMODT00000001519.4	ENSMODG00000001242		21.5383	22.2634	63.8586	11.9763	22.1443	31.0763	25.7267	39.2751	33.8692	30.2672	18.2121	36.2746
ENSMODT00000001524.3	ENSMODG00000001243	FAF1	0	0	0	0	0	0	0	0	0	0	0	0
ENSMODT00000001526.4	ENSMODG00000001244	HMGXB4	5.41551	11.7433	1.31272e-08	4.47915	4.80127	2.40897	4.42293	1.34166e-06	0.000102163	0.0105097	2.01734	4.25212
ENSMODT00000001528.3	ENSMODG00000001245	IFT52	69.5097	69.7627	17.574	16.6855	11.8494	20.4457	11.1183	23.6667	39.8056	33.5187	76.9906	77.2155
ENSMODT00000001529.4	ENSMODG00000001246		36.8222	34.8334	28.7281	15.5808	18.2033	9.71576	9.96183	20.851	26.6457	19.2378	40.0051	51.4818
ENSMODT00000001530.4	ENSMODG00000001247		0	0	0	0	0	0	0	0	0	0	0.105655	0.118072
ENSMODT00000001531.3	ENSMODG00000001249		0	0	0	0	0	0	0	0	0	0	0	0
ENSMODT00000001533.4	ENSMODG00000001250		0	0	0	0	0	0	0	0	0	0.0726322	0.0215549	0
ENSMODT00000001534.5	ENSMODG00000001251	DMRTA2	0.101312	0.0234986	0.0547093	0.0572794	0	0.0124312	0.0160096	0	0	0.589641	0	0.0685968
ENSMODT00000001535.3	ENSMODG00000001253		0.233655	0.261452	0.0210513	0.0482463	0	0.103928	0.142036	0.548819	1.2859	0.205572	1.15496	0.875037
ENSMODT00000001539.2	ENSMODG00000001252	FGA	0	0.0263512	0.23156	0.0722507	52.3684	231.603	36.5065	330.673	254.558	188.126	0.183903	0.505236
ENSMODT00000001544.4	ENSMODG00000001258	SLC5A2	0.103224	0.0394798	0.0651782	0.0199898	0	0.0412428	0	0.185439	0.168919	0	0.25477	0.10685
ENSMODT00000001545.4	ENSMODG00000001260		0.772361	1.37054	0.109315	0.0269346	0.5116	1.52009	0.22704	1.58069	0.0944651	0.199559	2.52918	5.09168
ENSMODT00000001548.4	ENSMODG00000001262	RASGEF1A	6.67024	6.57397	1.21746	0.687979	0	4.75274	7.21235	13.8772	23.9438	11.9947	23.5461	26.6809
ENSMODT00000001549.4	ENSMODG00000001263		0.631422	0.671008	0.187884	0	0	0.17777	0	0.219141	0.705412	1.12115	1.77056	0.890318
ENSMODT00000001550.4	ENSMODG00000001264	LARGE1	11.3151	11.0183	1.6017	1.02471	4.25485	4.03907	2.85935	3.07079	4.03647	2.98185	5.71445	6.40947
ENSMODT00000001552.3	ENSMODG00000001265		0.620487	0.153526	0.749599	0.0341068	5.03764	207.389	7.05568	243.026	642.182	804.189	2.17434	2.69147
ENSMODT00000001555.2	ENSMODG00000001268		373.227	343.996	554.458	902.266	286.846	310.219	355.303	114.265	188.337	227.551	91.9993	95.3036
ENSMODT00000001556.3	ENSMODG00000001269		0	0	0	0	0	0	0	0	0	0	0	0
ENSMODT00000001557.3	ENSMODG00000001267	FSHR	0	0	0	0	0	0	0	0	0	0	0.187012	4.87714
ENSMODT00000001559.4	ENSMODG00000001270	LMX1A	0.23788	0.482757	0	0	0	0	0	0	0	0	0	0.891526
ENSMODT00000001561.3	ENSMODG00000001275		1583.73	1517.27	443.796	927.43	450.703	288.913	408.132	368.261	626.615	572.6	1032.7	1034.75
ENSMODT00000001563.3	ENSMODG00000001274	MEIS2	23.8273	22.3114	2.571	3.65094	0	8.17646	4.05654	7.94475	6.98131	6.57836	32.5163	30.7011
ENSMODT00000001564.3	ENSMODG00000001277	RAPGEF5	3.33207	2.79855	6.25474	0.656848	1.71009	3.82173	0.188579	4.92275	3.91276	4.09918	3.47814	5.48741
ENSMODT00000001566.4	ENSMODG00000001320		0.160184	0.416748	0.168017	0.0376576	0	0.0795908	0.15266	0.504644	0	0.41673	0.270333	1.02741
ENSMODT00000001568.4	ENSMODG00000001279	FGG	0	0	0.147456	0	61.883	281.741	42.6985	323.579	98.7631	167.347	0.409883	3.57917
ENSMODT00000001572.4	ENSMODG00000001280	SAMHD1	21.8352	21.3545	7.63191	3.0533	1.107	11.2769	9.33398	7.89385	8.23103	9.66256	21.7471	14.051
ENSMODT00000001574.4	ENSMODG00000001273		0.34525	0.369034	0.233498	0.292835	0.202945	0.921603	0.529935	1.00688	0.978268	0.844614	1.70517	2.20518
ENSMODT00000001576.4	ENSMODG00000001282	KCND3	8.4203	9.20054	1.32006	0	0	0	0	1.11962	0.890569	0	19.5116	13.6735
ENSMODT00000001582.4	ENSMODG00000001285	CACHD1	21.5182	25.0011	18.2564	4.89728	22.5623	11.2632	9.0311	22.7296	25.1715	26.1536	22.4883	34.3031
ENSMODT00000001584.4	ENSMODG00000001287	CDCA7L	5.0929	8.82431	4.539	2.98674	1.01033	1.77658	0.988905	0.741229	0.810138	1.80777	4.01932	6.22797
ENSMODT00000001585.3	ENSMODG00000001290	HS3ST1	7.26937	10.8602	2.22773	2.47328	0.814138	14.7199	4.44912	10.8049	18.9431	33.5398	8.31	10.1776
ENSMODT00000001586.4	ENSMODG00000001289	TLDC2	0.447857	0.58057	0.0422812	0.229701	0.227358	0.161539	0.205114	0.395726	0.824165	0.561309	1.06519	0.378095
ENSMODT00000001587.4	ENSMODG00000001291	RXRG	0.258344	0.115263	0.021413	0	0	0.040305	0.076508	0	0.0797318	0	1.59384	1.04769
ENSMODT00000001590.3	ENSMODG00000001293		5.85176	7.11432	1.63585	0.681083	0	2.80205	1.21915	2.76528	3.33883	4.56405	8.12773	11.0921
ENSMODT00000001592.3	ENSMODG00000001295		15.111	14.0979	5.91128	5.14193	2.45055	7.8246	3.40834	7.53784	8.18801	6.99161	30.4989	47.2955
ENSMODT00000001593.3	ENSMODG00000001296		0.307751	0	0	0	0	0	0	0	0	0	0.211275	0.315122
ENSMODT00000001594.3	ENSMODG00000001297		0	0	0	0	0	0	0	0.0849828	0.0965061	0.0815402	0.0734787	0
ENSMODT00000001598.4	ENSMODG00000001300	ELAVL4	0	0	0	0	0	0	0	0	0	0	0	0
ENSMODT00000001600.4	ENSMODG00000001302	RBM46	0	0	0	0	0	0.057618	0.444552	0	0	0	0	0
ENSMODT00000001602.4	ENSMODG00000001303		171.049	179.676	192.174	193.902	225.862	216.248	210.012	204.108	206.933	257.282	180.872	193.872
ENSMODT00000001603.3	ENSMODG00000001301		0.142852	0.509513	0.35397	0.143125	0	0.653581	0.510815	0.274696	0.599625	0.149622	0.000109696	0.878386
ENSMODT00000001606.2	ENSMODG00000001304		0	0	0.557397	0.112283	0	0.970345	0	2.18498	6.19065	7.66986	3.93482	0
ENSMODT00000001607.4	ENSMODG00000001305	MGST3	181.673	155.86	34.9521	56.2573	212.685	333.527	350.198	267.251	393.617	405.988	127.888	165.392
ENSMODT00000001611.5	ENSMODG00000001308	LONP1	38.6023	41.6997	90.4605	50.1924	49.4382	31.7945	34.203	55.4975	53.1878	46.3626	60.9314	61.87
ENSMODT00000001612.4	ENSMODG00000001307	EFR3A	18.5383	35.0272	43.6221	8.52537	40.5514	16.6983	16.802	52.0065	55.4414	50.4143	92.4258	87.1369
ENSMODT00000001615.4	ENSMODG00000001310	MAN2A1	24.545	27.263	44.5716	3.86444	23.2217	11.4217	10.6185	31.6351	36.7412	31.235	47.7989	56.7068
ENSMODT00000001616.4	ENSMODG00000001311	DDX20	18.7233	21.3912	16.0149	8.99619	8.22348	6.59645	6.89086	16.3733	23.4764	15.1721	32.6229	32.4976
ENSMODT00000001619.3	ENSMODG00000001314		0.124444	0.0292191	0.0322337	0	0	0.0918903	0	0.0521161	0.118761	0.0981873	1.28641	28.5639
ENSMODT00000001620.3	ENSMODG00000001313		17.3378	23.2747	5.95174	6.76337	5.05091	9.24524	7.31591	11.0551	14.8393	10.5796	37.9382	42.6033
ENSMODT00000001623.4	ENSMODG00000001316	ARPC1B	58.1624	48.982	33.9679	33.1085	58.7087	111.872	143.814	124.74	81.3154	133.505	100.103	113.78
ENSMODT00000001624.4	ENSMODG00000001319		6.72936	7.05495	9.22201	0.573646	2.25285	1.58838	0.569834	7.43518	11.0073	6.68419	17.9811	17.97
ENSMODT00000001627.3	ENSMODG00000001318	TSGA10	24.0205	17.6068	2.64812	2.70754	1.86247	1.59723	2.60317	4.36325	6.45073	4.38117	44.4153	60.7567
ENSMODT00000001631.4	ENSMODG00000001322	CLCN1	0	0	0	0	0	0	0	0	0	0	0	0
ENSMODT00000001632.3	ENSMODG00000001323		67.7202	77.9515	98.642	40.8788	80.0461	52.186	77.2995	81.4052	116.165	106.85	132.006	135.304
ENSMODT00000001634.3	ENSMODG00000001324	PDAP1	130.012	150.167	188.926	188.112	163.199	110.984	145.494	185.634	171.486	135.755	179.713	172.001
ENSMODT00000001637.4	ENSMODG00000001327		12.6195	8.77229	9.84981	8.93534	10.9672	12.6075	14.6824	15.8159	20.9467	19.8002	15.448	18.6754
ENSMODT00000001643.4	ENSMODG00000001332	MITD1	3.20925e-06	3.48218e-05	10.9915	1.02044	3.12191	0.947832	0.0214588	12.8669	10.9226	14.9758	7.44241	18.0964
ENSMODT00000001645.4	ENSMODG00000001333	DPH6	5.72111	7.32507	5.97546	2.98132	1.68142	3.48051	3.31745	5.55438	6.68906	6.70289	12.4359	10.6299
ENSMODT00000001646.4	ENSMODG00000001335	TMCO1	71.879	78.5178	167.002	93.587	127.386	126.212	116.638	223.64	231.721	223.886	96.0102	112.66
ENSMODT00000001648.1	ENSMODG00000001337	LYG2	0	0	0	0	0	0	0	0	0	0	0	0
ENSMODT00000001649.4	ENSMODG00000001336	FBXO7	35.4903	38.3443	56.495	36.3902	49.4093	143.392	96.0402	94.7999	71.344	121.881	23.9526	32.8681
ENSMODT00000001650.4	ENSMODG00000001338		4.19964	29.4601	423.512	204.799	1482.39	22.3945	239.074	152.11	21.8048	22.9382	97.8936	122.096
ENSMODT00000001651.4	ENSMODG00000001339		23.1879	22.9409	15.6403	12.0802	13.8649	10.3037	11.7394	14.138	22.2909	13.5392	27.2933	22.0978
ENSMODT00000001652.3	ENSMODG00000001340		12.8814	12.4655	1.9707	1.23252	4.63488	3.07309	2.36135	10.8861	16.7374	9.0971	23.9339	32.9695
ENSMODT00000001655.4	ENSMODG00000001343		52.5316	57.1078	108.996	135.322	139.233	252.209	199.726	218.206	92.4627	154.467	64.9967	50.8846
ENSMODT00000001658.4	ENSMODG00000001347	LYG1	0.0792418	0.199105	0	0	0	0.0419554	0.105097	0	0	0	0.164759	0
ENSMODT00000001661.3	ENSMODG00000001344	SLC6A3	0	0	0	0	8.42464	0	0.680845	2.78925	2.80507	0.321205	0	0
ENSMODT00000001662.4	ENSMODG00000001350		4.50956	6.80104	5.8932	3.35331	2.76864	2.95262	1.63567	3.88434	5.73104	3.86713	7.64224	7.09635
ENSMODT00000001663.4	ENSMODG00000001349	UCK2	16.2635	19.1439	35.0462	6.0401	407.988	189.258	125.048	487.512	272.995	247.283	20.7834	19.7718
ENSMODT00000001664.3	ENSMODG00000001351	ATP5PB	256.871	293.76	1123.76	1249.3	189.375	268.547	322.401	189.212	198.031	216.348	249.956	201.635
ENSMODT00000001665.3	ENSMODG00000013227	SLC6A2	0	0	0	0	0	0	0	0	0	0	0	0
ENSMODT00000001672.3	ENSMODG00000001353	NDRG3	2.69608	2.86006	0.59166	0.129629	0	1.04072	1.40727	1.89721	1.85025	0	6.97365	5.04356
ENSMODT00000001674.4	ENSMODG00000001357		278.095	121.206	18.8326	21.554	8.50913	2.62363	10.6865	8.78446	8.01645	5.47395	101.534	182.941
ENSMODT00000001675.3	ENSMODG00000001355	BPIFC	0.0683601	0.0720591	0.510572	0.346541	9.0648	0.214804	31.7611	1.53741	2.35975	1.43966	1.00148	1.74964
ENSMODT00000001677.4	ENSMODG00000001356	DNAH11	1.52308	0.986089	2.1028	0.1333	2.42415	0.351327	0.432944	1.56069	2.24778	0.71461	4.87005	11.157
ENSMODT00000001679.3	ENSMODG00000001360	FAM78B	0	0	0	0	0	0.0514096	0	0	0	0	0	0
ENSMODT00000001683.3	ENSMODG00000001364	WDR77	28.7388	46.1301	133.267	75.7764	20.3264	11.9332	16.7265	22.7492	36.8505	20.619	76.321	49.2951
ENSMODT00000001687.3	ENSMODG00000001367	CPSF4	16.6326	22.0177	22.6056	11.8144	20.0554	12.6518	11.4359	17.6595	20.4495	13.8918	24.8726	21.1861
ENSMODT00000001688.5	ENSMODG00000001368	SP4	8.04967	8.20796	0.336762	0.337443	2.25055	0.9354	0.498195	2.15772	1.8193	0.485295	4.85992	5.93224
ENSMODT00000001689.3	ENSMODG00000001372		1.33938	5.65324	10.9396	7.12623	13.9876	0.0954725	0.805501	2.0071	0	0.310377	6.58006	9.90062
ENSMODT00000001690.4	ENSMODG00000001371	RANBP3	41.6678	40.9167	26.1779	5.93566	17.6371	10.0857	9.19949	23.239	30.9461	19.8559	56.7028	54.5822
ENSMODT00000001691.3	ENSMODG00000001369	AQR	22.9998	25.0673	16.3434	2.34296	6.52251	11.2419	3.43812	27.6645	33.9732	25.2688	59.4651	53.9906
ENSMODT00000001692.4	ENSMODG00000001373		0	0.0972993	0	0	0	0	0	0.257934	0.198347	0.042062	0.535941	0.507162
ENSMODT00000001693.4	ENSMODG00000001370	SPATA6	7.08307	4.9943	1.1304	0.546257	0.124417	0.769846	0.464642	1.40087	1.30827	0.975869	6.65738	8.64487
ENSMODT00000001694.4	ENSMODG00000001374	EFCAB7	15.1484	13.1034	5.82296	4.56232	8.16738	8.63496	6.87922	13.0357	19.0852	16.547	28.4486	36.3984
ENSMODT00000001696.3	ENSMODG00000001375	SP8	0.303108	0.118868	0.0557051	0.0966863	0	0	0	0	0	0	0.275909	1.34089
ENSMODT00000001697.4	ENSMODG00000001377		1.22737	0.854406	0.145507	0	0	0	0.305598	0.111892	0.255169	0.106708	3.13171	4.4821
ENSMODT00000001698.4	ENSMODG00000001378	SLA2	1.04415	0.248975	0	0.15399	0	0.0520594	0.065242	0.156814	0.891884	0.37193	1.27032	1.65307
ENSMODT00000001703.3	ENSMODG00000001359		0.120099	0.196896	0.174376	0	0	0	0	0.0690715	0.15509	0.264914	0.495952	0.737595
ENSMODT00000001705.4	ENSMODG00000008918	ACTA1	7.89034	15.8087	2.30405	2.56362	0.593668	8.55079	7.85089	3.66717	3.61538	8.61167	5.76855	2.81728
ENSMODT00000001707.4	ENSMODG00000001380	MYCBP2	2.60457	3.46425	3.20566	0	3.04969	2.00058	1.01556	4.84757	2.01225	3.6833	3.64452	4.37194
ENSMODT00000001708.3	ENSMODG00000001386	FAM131B	0.210011	0.321093	0	0.0402884	0	0.0824549	0	0	0.150434	0.125881	0.280317	1.32972
ENSMODT00000001711.4	ENSMODG00000001387	EIF5B	0	0	0	0.567695	1.45222e-05	0.190033	0	0.781207	1.4738	0	5.87381	0.101184
ENSMODT00000001712.4	ENSMODG00000001388	ITGB8	7.81041	8.3727	0.721684	0.0978315	4.33835	1.27134	1.64538	4.6221	6.95842	6.00039	10.6645	18.4128
ENSMODT00000001714.4	ENSMODG00000001390	FER	3.61251	4.94469	5.03443	0.808774	5.08829	3.00813	2.91663	9.9322	6.95758	11.8102	16.5858	16.5464
ENSMODT00000001715.3	ENSMODG00000001393	ATG4C	16.783	18.3131	10.8511	7.28377	13.4394	7.83676	9.60509	14.1118	11.5972	9.26461	17.3989	18.9918
ENSMODT00000001716.4	ENSMODG00000001392	WDR1	99.4469	91.6908	104.961	59.5294	119.394	192.17	215.241	260.77	255.765	314.006	206.816	159.387
ENSMODT00000001718.4	ENSMODG00000001394	MACC1	5.96517	4.86109	1.38197	0.940229	0.350115	0.53282	0.357091	1.3841	5.1971	2.5862	4.13725	7.84921
ENSMODT00000001719.4	ENSMODG00000001395		0	0	0.0535963	0	0	0	0	0	0	0	0	0
ENSMODT00000001721.3	ENSMODG00000001396	TMEM196	0	0	0	0	0	0	0	0	0	0	0	0
ENSMODT00000001725.4	ENSMODG00000001398	RFX2	0	0.785484	0	0	0	0.331361	0	0	0.829343	0.802171	0	0.883144
ENSMODT00000001727.4	ENSMODG00000001402		19.2675	22.246	9.65117	5.71255	5.05311	5.86083	4.03678	6.8315	9.25859	7.88283	15.1244	12.3402
ENSMODT00000001733.4	ENSMODG00000001405	FERD3L	0	1.50601	0	0	0	0.105963	0	0.752804	0.427953	0.353058	0.532354	0.714424
ENSMODT00000001736.4	ENSMODG00000001408	TMEM11	5.80976	5.92166	8.59711	3.2939	70.3694	11.6804	29.4277	20.296	15.5708	6.78979	2.5194	4.63383
ENSMODT00000001737.4	ENSMODG00000001406	ZYX	6.39432	5.84674	1.48631	0.530118	4.4553	2.98802	4.32863	0.263812	0.242139	0.393068	0.310841	0.730804
ENSMODT00000001740.2	ENSMODG00000001389	MYH4	0.0201919	0.00667786	0.00750859	0	0.102531	0.26683	0.0176659	0.0738488	0.0278944	0.0709187	0.0210978	0
ENSMODT00000001742.4	ENSMODG00000001409	REV1	16.8572	18.7605	9.76719	6.73976	6.0515	7.75731	6.01727	19.4078	30.6372	22.8682	37.1595	32.1875
ENSMODT00000001743.3	ENSMODG00000023924	TWIST1	5.2047	5.27619	0.894416	0.982331	0	3.30287	0.884683	0.657048	0.743728	0.828146	0.890062	3.92917
ENSMODT00000001747.4	ENSMODG00000001415		4.70957	6.25116	2.43742	2.34849	0.444617	2.63611	2.4693	4.49465	5.17431	6.36447	10.0699	8.84196
ENSMODT00000001751.3	ENSMODG00000001414	RTCB	64.8388	75.296	86.7546	44.867	158.794	155.491	137.184	149.877	111.534	137.935	102.736	92.5926
ENSMODT00000001752.3	ENSMODG00000001417		1.31741	4.00409	1.1546	0.682343	0.629243	1.26277	0.890766	1.63081	1.33189	1.00759	10.0882	18.3267
ENSMODT00000001753.3	ENSMODG00000037594		0	0	0	0	0	0	0	0	0	0	0	0
ENSMODT00000001756.4	ENSMODG00000001420	LPCAT1	12.6348	13.4769	24.9041	3.29268	8.32413	7.16906	3.09926	9.17095	10.7449	12.127	15.6269	15.3932
ENSMODT00000001758.4	ENSMODG00000001421	DHRS7B	11.8376	1.56096	13.0496	17.4438	6.66545	11.9967	13.3889	24.5906	32.0211	30.1379	38.8336	34.4453
ENSMODT00000001761.3	ENSMODG00000001423	DLGAP4	2.96425	1.81125	2.06421	1.43439	0.669633	1.88861	2.45517	0	0	0	0.123037	0.204968
ENSMODT00000001762.3	ENSMODG00000001425		32.4457	51.2734	32.4609	33.8875	162.349	29.0936	41.1797	74.159	73.416	86.3563	91.1898	107.152
ENSMODT00000001763.3	ENSMODG00000001424		0	0	0	0	0	0	0.0367314	0	0	0	0	0.0928247
ENSMODT00000001764.2	ENSMODG00000001426	GREM1	0.31838	0	0.22547	0	0	3.91986	0	2.83504	27.732	34.1964	3.11403	1.03229
ENSMODT00000001765.3	ENSMODG00000001427	AAR2	21.1882	24.4969	27.7561	18.3152	18.4531	14.4688	11.196	19.04	20.7999	19.1043	24.4985	18.1619
ENSMODT00000001767.2	ENSMODG00000001428		0.142172	0	0	0	12.1297	0	0.178903	0.188976	2.33011	0.370206	0	0
ENSMODT00000001768.4	ENSMODG00000001430	ADCY8	1.19945	1.38718	0.128458	0.147789	0	0	0	0	0	0	0	0
ENSMODT00000001769.4	ENSMODG00000001431		1.46308	0.522193	0	0	0	0.0871394	0	0.07666	0	0.109726	2.96826	1.2561
ENSMODT00000001771.4	ENSMODG00000023235		0	0	0	0	0	0	0	0	0	0	0	0
ENSMODT00000001772.4	ENSMODG00000001435	USP22	33.8519	31.0012	12.1192	14.566	24.4467	24.7226	21.8411	30.8541	33.2989	31.6518	30.2628	31.028
ENSMODT00000001773.4	ENSMODG00000001434	SCEL	13.8648	12.101	0	0	21.6217	157.308	112.237	316.108	150.752	370.833	18.8184	22.0485
ENSMODT00000001774.3	ENSMODG00000001436		23.719	25.4442	20.0522	20.2388	9.85967	11.9113	14.7137	21.2486	20.8743	19.8489	46.8153	27.4205
ENSMODT00000001775.4	ENSMODG00000001433		0.154579	0.301827	0.432037	0.25716	0.158605	0	0	0	0	0.0494589	2.73198	3.10743
ENSMODT00000001776.4	ENSMODG00000001437	IRX4	0	0	0	0	0	0.0193453	0	0	0	0	0	0
ENSMODT00000001781.4	ENSMODG00000001441		2.0702	3.00739	2.64671	0.560049	1.38676	0.454838	0.498166	1.83284	4.13077	1.96049	4.36817	5.66072
ENSMODT00000001786.4	ENSMODG00000001442	HDAC9	0	0.0537509	0	0	0	0	0	0	0	0	0.0787418	0
ENSMODT00000001788.1	ENSMODG00000001445		557.446	481.628	175.072	267.194	0	701.416	692.569	164.008	202.004	222.54	217.658	227.722
ENSMODT00000001794.4	ENSMODG00000001448	PRDM4	10.7357	11.7225	8.68878	5.54067	6.64307	9.02058	6.20461	12.6651	10.2835	8.06934	9.46063	11.2861
ENSMODT00000001795.3	ENSMODG00000001450	SLC2A9	3.88233e-10	0	0.156486	0.127559	0.982091	0	0.091345	0.117716	0	0	1.1854	0.649332
ENSMODT00000001796.4	ENSMODG00000001451	IRX1	0.100074	0.0192418	0	0	0	0.0598682	0.0254457	0.106504	0	0	0.0605365	0.0678111
ENSMODT00000001797.3	ENSMODG00000001452		4.29688	1.80632	2.70598	2.64118	3.18148	3.15823	1.58267	4.42149	1.65342	3.09589	3.02047	5.34289
ENSMODT00000001799.3	ENSMODG00000001453		195.795	179.301	79.7592	72.8034	85.3802	81.8278	106.754	89.1004	119.915	106.361	150.648	148.752
ENSMODT00000001804.3	ENSMODG00000001456	QPRT	2.83909	2.2624	1.63256	10.9883	0.00610204	3.18779	5.30786	8.73566	8.79702	8.998	0	4.30632e-06
ENSMODT00000001805.4	ENSMODG00000001457		0.137183	0	0	0	0	0	0	0.117394	0	0.60609	0	0
ENSMODT00000001808.4	ENSMODG00000001460		6.42133	7.33812	7.15433	0.423815	6.81217	3.96941	1.77832	12.3672	15.2991	11.5677	16.358	20.0665
ENSMODT00000001814.3	ENSMODG00000001462	DRD5	0.212479	0.14638	9.81157	4.14176	0.314681	0.765459	0.115575	0.255424	0.699722	1.60265	0.0877922	0.14802
ENSMODT00000001816.3	ENSMODG00000001464	SNX13	8.90878	11.2303	11.3205	2.74535	13.7137	7.3735	9.42698	22.3144	21.0431	21.196	13.0805	18.7161
ENSMODT00000001817.3	ENSMODG00000001465	EPHA1	5.05773	5.13482	7.85073	4.59754	0.93403	1.26007	0.347429	0.375	2.68039	2.06563	3.83833	6.02136
ENSMODT00000001818.4	ENSMODG00000001467		0.673462	1.19801	4.43015	2.30312	2.51829	0.181191	1.31887	0.861869	0.630255	0.567537	22.8345	18.0987
ENSMODT00000001821.4	ENSMODG00000001468	TBC1D10B	31.4925	24.4547	23.4906	13.3436	31.4608	58.2479	39.734	62.2433	44.9714	36.8017	25.1286	35.8369
ENSMODT00000001823.3	ENSMODG00000001470	CMPK1	70.7695	76.2911	145.322	123.393	59.0937	74.5275	78.5662	91.9643	96.1684	90.2774	91.4012	95.1372
ENSMODT00000001824.5	ENSMODG00000001471	PWP1	21.3415	26.1416	13.8993	13.4499	18.0139	14.8523	16.8967	18.1527	24.5622	16.2337	40.2044	23.6015
ENSMODT00000001825.3	ENSMODG00000001472	LONRF2	12.4802	13.8835	16.1534	2.97634	3.82326	5.90743	3.54279	9.52218	15.6324	14.9631	26.9517	41.3023
ENSMODT00000001826.4	ENSMODG00000001467		5.03441	8.35001	0.219719	0.376139	15.3615	2.41966	3.5559	5.89424	2.15995	8.16999	5.82073	3.00129
ENSMODT00000001827.4	ENSMODG00000001474	GOLT1A	5.109	3.29516	9.77125	2.91494	9.40365	31.9822	6.63858	13.4729	11.4538	9.33503	4.48829	7.70071
ENSMODT00000001830.3	ENSMODG00000001476	MYLPF	4.21043	3.95806	2.66626	0.708566	5.68826	3.44229	1.60272	0	0.779569	0.689582	0	0
ENSMODT00000001834.3	ENSMODG00000001478	T2R41	0	0	0	0	0	0	0	0	0	0	0	0
ENSMODT00000001838.4	ENSMODG00000001483	GAS7	2.3528	2.5541	0.897237	0.118699	1.03846	1.34275	0.282281	4.62196	2.87387	5.29826	5.02404	6.32558
ENSMODT00000001839.4	ENSMODG00000001481	SLAIN1	4.39447	4.14063	7.2482	3.09213	18.1207	1.09035	3.11573	8.32192	10.2795	4.04865	4.70004	6.17513
ENSMODT00000001841.4	ENSMODG00000001484		20.9573	22.1174	6.83685	3.09035	15.5508	15.9168	8.67205	14.9064	15.1993	14.067	15.1963	21.5188
ENSMODT00000001842.3	ENSMODG00000001485	CHI3L2	0.0401734	0.0786442	0.0433062	0	0	0.284362	0.771207	3.21233	19.5498	27.9795	0.112582	0.756493
ENSMODT00000001846.3	ENSMODG00000001489	PDCL3	7.7191	6.85249	8.06314	6.471	15.5959	12.4624	8.21067	30.4264	34.5204	46.4048	37.7161	33.7645
ENSMODT00000001852.4	ENSMODG00000001490		0	0	0	0	0.301028	0	0	0	2.05094	0.0532834	0.605547	3.83956
ENSMODT00000001855.4	ENSMODG00000001491	MBL2	0.0267196	7.66797	0	0.0302042	0.81986	3.38591	1.66888	1.38327	1.76684	0.732133	106.692	124.658
ENSMODT00000001859.5	ENSMODG00000001494	STIL	2.87263	4.1779	2.86902	1.101	3.3294	1.56429	1.98239	2.30251	0.00858588	1.5682	3.93602	7.71515
ENSMODT00000001864.4	ENSMODG00000001501		0.0437604	0.0217603	0.0488944	0	0	0.0228145	0.0857765	0.0764289	0.51988	0.509782	0.0329527	0.110392
ENSMODT00000001866.6	ENSMODG00000001500	LYAR	38.2904	50.2871	17.1613	20.5882	6.68939	11.054	9.95032	16.7318	30.2994	22.1765	97.9474	88.7201
ENSMODT00000001867.3	ENSMODG00000001498	RCVRN	0	0	0	0	0	0	0	0	0	0	0	0
ENSMODT00000001869.5	ENSMODG00000001502	TAL1	2.05287	1.70932	0.711433	0.507664	1.9375	6.13228	3.14656	8.03155	5.51229	4.47891	1.77812	2.96518
ENSMODT00000001870.2	ENSMODG00000001503		0	0	0	0	9.2466	0.880392	0	0	3.47692	2.79795	5.54944	8.85527
ENSMODT00000001871.3	ENSMODG00000001504	SCAND1	138.694	150.287	137.214	134.937	116.995	155.021	211.888	125.835	53.2258	64.6268	20.7623	48.7951
ENSMODT00000001873.3	ENSMODG00000001506	ANGPTL3	0.0312684	0	0	0.0318875	0	0	0.0407107	0	0.456292	0.0474927	0.0860027	0.0481097
ENSMODT00000001874.4	ENSMODG00000001507	EDNRB	29.9977	35.054	94.4633	35.5555	104.424	45.9745	43.6484	105.833	88.7399	73.2322	58.7883	39.8162
ENSMODT00000001875.4	ENSMODG00000001509		4.32806	2.39693	92.97	90.8415	7.06265	11.2508	2.1076	12.554	30.5632	36.9755	1.93306	2.75229
ENSMODT00000001876.3	ENSMODG00000001508		0	0	0	0	0	0	0	0	0	0	0	0
ENSMODT00000001882.3	ENSMODG00000001511	PLEKHA6	0	0	0	0	0	0	0.198154	0.499888	0.44683	0	0.242372	0.25069
ENSMODT00000001883.3	ENSMODG00000001514	USP1	52.8581	67.6587	18.8544	9.86321	23.0463	17.124	16.334	30.4165	30.5436	28.5617	46.0781	51.3171
ENSMODT00000001884.4	ENSMODG00000001515	POU4F1	0	0	0	0	0	0	0	0	0	0	0	0
ENSMODT00000001885.5	ENSMODG00000001516	ZBTB49	3.99743	3.7847	4.96372	1.85427	2.7254	2.60188	1.55943	5.6365	9.50465	6.53641	11.8096	9.01551
ENSMODT00000001888.3	ENSMODG00000001518	GLP2R	0	0	0	0	0	0	0	0	0	0	0	0
ENSMODT00000001889.4	ENSMODG00000001519	NSG1	4.88553	3.86157	0.129821	0	0	0.242022	0	0.285367	0.484613	0.961452	3.8052	4.67678
ENSMODT00000001891.3	ENSMODG00000001521		0	0	0	0	0	0	0	0	0	0	5.99608e-08	0
ENSMODT00000001892.3	ENSMODG00000001520	CEPT1	7.00299	6.78852	8.46543	4.04366	4.8349	2.66533	2.04438	1.37396	2.47781	2.14763	3.08022	2.36238
ENSMODT00000001893.4	ENSMODG00000001522	ASAP1	0	0	0	0	1.3908	6.51145e-05	0	2.03258	1.05706	1.71109	2.33854	1.54515
ENSMODT00000001894.4	ENSMODG00000001523	ADAMTS16	0.982035	1.40968	0.0834207	0	0	0.227974	0	0.635383	3.00043	2.32888	0.502106	0.978163
ENSMODT00000001895.4	ENSMODG00000001525	OBI1	5.808	6.53861	2.11311	0.643779	0.406257	1.13566	0.605938	1.94919	3.67613	3.71753	16.9275	12.4859
ENSMODT00000001896.4	ENSMODG00000001524		0.539072	0.98386	8.57085e-05	5.64585e-09	3.26485	13.8637	1.8487	8.15546	0.27056	0	2.9414	2.87754
ENSMODT00000001898.4	ENSMODG00000014685	ASAP2	15.7708	14.7182	14.0984	2.89263	25.1357	17.178	78.4372	43.7423	31.9052	24.3242	15.0422	28.7896
ENSMODT00000001904.4	ENSMODG00000001532	DYDC1	27.0422	13.5662	3.19687	3.95458	2.3148	1.20141	1.46727	4.12357	3.32148	4.14648	25.4768	27.211
ENSMODT00000001906.4	ENSMODG00000001533	PHF20	8.93714	9.55992	4.60895	1.39259	3.63267	4.16529	2.29472	7.06948	13.0241	7.832	29.709	26.6459
ENSMODT00000001907.3	ENSMODG00000001535	MSX1	0.406862	0.39227	0.441505	0.261758	1.90205	11.4873	3.67888	9.91571	9.07145	6.45417	1.17408	5.3327
ENSMODT00000001908.3	ENSMODG00000001534		0	0	0	0	0	0	0	0	0	0	0	0
ENSMODT00000001913.2	ENSMODG00000003100		0	0.144746	0.0916745	0	0	0	0	0	0.411643	0.734627	0.696954	0.00339869
ENSMODT00000001914.4	ENSMODG00000001539		15.106	23.3987	3.11404	1.10752	0.412085	1.28421	0.55669	1.32406	2.37581	4.35654	8.60529	9.61105
ENSMODT00000001915.2	ENSMODG00000041589		0	0	0	0	0	0	0	0	0	0	0	0
ENSMODT00000001916.3	ENSMODG00000001542	CYTL1	0	0	0	0	0	0.0264972	0	0	0.0967988	0.164583	0	0
ENSMODT00000001917.4	ENSMODG00000001540		4.20714	4.34653	4.70857	1.3824	7.21731	2.10562	2.78704	3.81736	4.72434	5.31252	4.68896	1.85663
ENSMODT00000001922.2	ENSMODG00000001531		1.03875e-10	0.00999415	0	0	0	0	0	0	2.62857e-10	0	5.7644e-07	3.27002e-06
ENSMODT00000001924.4	ENSMODG00000001544		20.9659	24.1523	29.0055	18.4482	8.57762	0.314199	4.08149	0.757267	1.48134	3.69652	24.5458	41.3222
ENSMODT00000001925.3	ENSMODG00000001545		21.3183	20.2446	12.8847	19.4772	42.6726	416.001	259.983	715.677	610.677	878.175	37.5262	54.4921
ENSMODT00000001927.4	ENSMODG00000001547	DHRS7C	1.46799	1.24101	5.4816	0.763719	0.459423	0.889519	0.751568	1.56909	2.30385	1.88044	1.64592	3.41118
ENSMODT00000001928.3	ENSMODG00000001548		0	0	0	0	0	0	0	0	0	0	0	0
ENSMODT00000001933.3	ENSMODG00000001551		68.0053	79.7787	169.522	77.8495	508.147	25.591	194.066	37.8406	38.9171	22.8991	25.812	24.7033
ENSMODT00000001934.4	ENSMODG00000045330		50.7401	60.7757	10.3798	3.76757	20.1794	96.7761	59.6239	89.5548	42.7273	55.5447	69.9177	52.3325
ENSMODT00000001939.4	ENSMODG00000001559		0.651706	0.529951	0.20236	0.0240721	0.238666	2.35583	0.735697	0.838881	2.45006	7.2041	0.385277	1.46801
ENSMODT00000001940.3	ENSMODG00000001556	TSPAN14	31.4815	33.3457	29.8362	11.4282	37.7876	51.8551	42.8461	77.6191	57.3459	65.5356	26.2221	35.175
ENSMODT00000001942.3	ENSMODG00000001557	RBM39	77.4825	77.0708	54.7886	43.1637	49.3498	54.1197	62.985	150.148	242.849	149.992	237.908	270.323
ENSMODT00000001944.4	ENSMODG00000001558		23.8654	24.183	42.918	7.6939	405.578	20.4717	96.0709	61.9603	44.6336	43.4415	25.1541	41.3096
ENSMODT00000001947.2	ENSMODG00000001562	ROMO1	624.316	710.15	847.818	1253.46	591.74	663.872	737.089	130.212	145.53	225.909	104.459	116.509
ENSMODT00000001951.5	ENSMODG00000001565	LRIF1	8.03953	8.69426	4.23728	0.8192	3.03175	3.44761	1.7223	5.93239	10.6927	7.39485	13.3362	13.8247
ENSMODT00000001953.3	ENSMODG00000001567		0	0	0	0	0	0	0	0	0	0	0	0
ENSMODT00000001955.4	ENSMODG00000001570	METTL23	16.3104	21.9249	24.4302	28.7737	12.9159	5.01847	7.5433	21.4568	35.6473	25.4442	54.0011	42.92
ENSMODT00000001957.4	ENSMODG00000001571		0.04187	0.306452	0.410451	0	2.55338	0.171543	1.09097	1.50207	3.11883	0	0	0.211672
ENSMODT00000001958.2	ENSMODG00000039417		0	0	0	0	0	0	0	0	0	0	0	0
ENSMODT00000001959.3	ENSMODG00000040115		0	0	0	0	0	0	0	0	0	0	0	0
ENSMODT00000001961.4	ENSMODG00000001574	RBM26	0.192502	0	0	0	0.000155998	0	0	0	0	0	0	0
ENSMODT00000001962.4	ENSMODG00000001575		102.812	133.448	126.328	83.8914	72.7316	56.1412	93.3211	75.5578	93.1221	81.1872	187.076	150.289
ENSMODT00000001966.3	ENSMODG00000001578		1.16627	0	0	0.295364	1.25531	0	0	0	0.520448	0.869243	0.990829	0.503011
ENSMODT00000001967.3	ENSMODG00000001580	MFSD11	10.2542	9.12746	41.4949	14.4604	64.4993	10.7894	15.0645	29.2379	32.2571	18.5444	19.0133	28.276
ENSMODT00000001968.4	ENSMODG00000001579	CRY1	39.4412	34.9526	12.566	7.07179	23.1011	12.1027	11.958	20.0606	31.9937	25.9228	32.742	40.3081
ENSMODT00000001971.3	ENSMODG00000001582	BZW2	28.3623	11.3677	13.6896	14.6478	5.39885	6.76965	4.46464	5.61756	8.34786	8.52361	21.0822	21.0588
ENSMODT00000001974.4	ENSMODG00000001583	PIK3C2B	7.61595	8.33447	13.1823	2.26055	8.58655	10.4245	5.02743	19.8884	23.2305	21.0626	13.9083	19.695
ENSMODT00000001977.4	ENSMODG00000001585	NFS1	25.4113	26.3847	24.2337	13.7629	27.6005	18.265	22.3578	34.0384	33.1601	29.8781	37.2192	28.8597
ENSMODT00000001981.4	ENSMODG00000001588	PRR14	12.871	14.2024	9.66861	7.01949	17.1339	8.00829	9.7025	9.58446	10.0911	10.9344	5.38839	10.7298
ENSMODT00000001984.2	ENSMODG00000001589	MTERF2	13.3996	13.391	4.50509	6.29754	1.64948	6.35209	5.15017	11.0802	14.0734	12.2003	35.2815	33.4677
ENSMODT00000001985.2	ENSMODG00000001590		0	0	0	0.119599	0	0	0	0	0	0	0	0
ENSMODT00000001987.3	ENSMODG00000001592	SPRY2	56.7818	55.1014	9.82373	8.80605	30.2849	17.2661	19.899	30.0777	44.2279	31.8534	35.5139	40.4137
ENSMODT00000001989.3	ENSMODG00000001593	CHAC2	8.11271	4.78986	10.5591	11.7861	4.37963	7.55697	5.21595	5.08021	6.17305	9.9735	9.84497	9.88169
ENSMODT00000001990.3	ENSMODG00000001595	TMEM263	24.3726	28.8297	116.058	27.136	32.0652	13.4716	15.3531	23.0591	24.9416	23.2158	57.3279	56.8181
ENSMODT00000001991.4	ENSMODG00000001594	CYRIB	12.7706	22.6601	19.3527	20.7138	0	12.0282	11.3114	9.85953	21.3534	11.6942	22.6301	16.688
ENSMODT00000001999.3	ENSMODG00000001600	ANKMY2	30.8643	24.6979	31.6922	15.1178	20.4542	11.0364	8.45154	15.2011	19.7764	24.6069	33.6152	28.4353
ENSMODT00000002000.4	ENSMODG00000001602		35.7176	35.6017	37.0026	15.9843	56.937	47.8074	34.8291	33.1182	34.8102	38.5718	11.347	27.4483
ENSMODT00000002003.4	ENSMODG00000001603	GUCY1A1	31.8631	35.0848	35.3042	9.18678	89.6691	6.02307	17.5725	55.6205	73.5782	18.1086	59.7277	49.2584
ENSMODT00000002004.4	ENSMODG00000001601	MGAT5B	0	0.0418603	0	0	0	3.58471e-08	0	0	0	4.21326e-10	0.851095	0.796384
ENSMODT00000002005.3	ENSMODG00000001607	SOSTDC1	24.6717	40.7491	1.50468	2.89944	6.70138	10.2577	9.58365	24.3723	6.84695	2.89846	8.75335	14.4356
ENSMODT00000002006.4	ENSMODG00000001605	MDM4	6.4615	6.95718	3.94395	0	0	0.372133	0	0	4.1381e-08	4.49734	10.1157	13.1706
ENSMODT00000002010.3	ENSMODG00000001608		0.0395211	0	0	0	0	0	0	0	0	0	0	0
ENSMODT00000002011.3	ENSMODG00000001611	SH2D4B	0	0.0223532	0.0497387	0	0.712782	0.116737	1.17632	1.15141	1.12473	0.226752	0.0679667	0
ENSMODT00000002015.4	ENSMODG00000001609		0	0	0	0	0	0	0	2.79452	0	0	0	0
ENSMODT00000002024.4	ENSMODG00000001619	PHKG2	37.6768	35.3737	39.5153	31.2699	55.4443	20.7856	39.2924	41.3801	49.081	35.0378	45.0666	64.0044
ENSMODT00000002025.3	ENSMODG00000001618	POGK	37.6233	40.1321	23.7675	12.0746	11.6179	12.8924	10.5245	22.349	30.9571	22.4966	38.1115	43.8172
ENSMODT00000002031.3	ENSMODG00000001625	TADA1	18.1738	20.3389	8.27361	4.97658	8.13156	5.95461	5.94981	13.2096	20.6107	11.77	36.2686	21.9497
ENSMODT00000002033.4	ENSMODG00000001627	CCDC189	14.1979	9.64766	21.6979	6.17489	13.7266	6.66865	7.66746	11.6856	20.8817	14.673	20.3286	31.9058
ENSMODT00000002035.4	ENSMODG00000001630	GUCY1B1	1.19431	0.158238	2.07865	8.26135	64.0603	0.122881	5.07473	92.3987	156.706	40.7093	46.0429	58.0364
ENSMODT00000002036.5	ENSMODG00000001629	RIC8B	10.3323	15.0954	8.8102	9.41984	21.5276	7.7091	4.54965	20.8737	28.2391	25.3935	35.0653	37.2223
ENSMODT00000002037.3	ENSMODG00000001631	ERLEC1	4.49187	1.76249	11.0538	1.38569	80.8505	0.228689	11.9728	16.96	16.5502	6.14082	14.3289	14.1559
ENSMODT00000002040.2	ENSMODG00000001632		0	0	0	0	0.27031	0.107868	0	0	0.362123	0	0	0
ENSMODT00000002043.4	ENSMODG00000001635		16.3909	17.6728	11.7222	4.03609	66.2607	17.5206	18.0637	36.4002	37.5349	39.0712	20.0368	21.3458
ENSMODT00000002044.4	ENSMODG00000001626	RYR3	0.0133502	1.55531e-05	0	0	0	8.77815e-06	0	0	0	0	5.92969e-08	0.273438
ENSMODT00000002047.4	ENSMODG00000001638	SEC14L1	9.37207	9.51887	10.0838	0.198229	18.5116	4.05639	2.78598	7.41184	12.6272	8.85914	18.8203	20.5834
ENSMODT00000002050.4	ENSMODG00000001640	MCCC2	27.6777	32.2319	119.291	75.3802	17.4787	59.2909	19.7856	50.5561	30.334	30.6324	65.8696	68.0125
ENSMODT00000002052.4	ENSMODG00000001642	AVEN	15.3529	17.7839	9.87529	5.35734	4.85668	10.0808	6.4565	9.19322	8.56734	8.15973	9.74396	11.9872
ENSMODT00000002054.4	ENSMODG00000001644	CARTPT	0.137249	0.276203	0	0.1607	0	0.215142	0.0912251	0	0.341481	0	0	0.192734
ENSMODT00000002056.4	ENSMODG00000001646	CRPPA	0.262186	5.56362e-07	0.0124047	0.870338	1.97419	4.67593e-05	1.62657	3.0564	0	0.0211857	5.31008e-06	1.24977
ENSMODT00000002057.3	ENSMODG00000001647	EMC7	62.2935	63.0803	149.216	144.336	174.145	135.974	122.503	144.581	150.745	185.432	76.8142	78.5564
ENSMODT00000002061.3	ENSMODG00000047150		0.0532664	0.0522751	0	0	0	0	0	0	0	0	0	0
ENSMODT00000002064.4	ENSMODG00000001652	SEPTIN9	30.5568	35.8034	8.5376	1.60028	13.7594	18.5922	34.1171	22.1531	22.8375	27.7374	49.024	40.0007
ENSMODT00000002066.3	ENSMODG00000001653		0.144717	0	0.155865	0	0	1.77561	0.73539	1.06088	1.34007	0.349981	1.65662	2.44278
ENSMODT00000002067.4	ENSMODG00000001655		0.448655	0.524201	0.902898	1.18665	0.132886	0.16483	0.172751	0.220691	0.250301	0.381664	0.113863	0.852745
ENSMODT00000002069.4	ENSMODG00000001657	KATNBL1	4.50976	5.66252	9.3883	4.57021	10.1149	9.21586	2.96572	16.6479	12.1279	17.0749	14.7744	16.3641
ENSMODT00000002075.4	ENSMODG00000001661	RFX4	0	0	0.179946	0.0379245	0.759881	0	0.0715172	0.0661194	0.112583	0	0	0
ENSMODT00000002077.4	ENSMODG00000001662	NFASC	0	0.0479341	0	0	0	0	0	0	0	0	0.0547617	0
ENSMODT00000002080.4	ENSMODG00000001667		11.7667	12.6773	18.5475	6.99881	17.2279	7.02313	9.75527	16.1475	21.879	14.2084	16.6676	18.6835
ENSMODT00000002081.4	ENSMODG00000001665	EMC4	49.6729	50.7327	76.0445	83.1285	68.8914	47.6886	55.6515	45.5295	44.35	55.5629	44.561	45.5341
ENSMODT00000002084.3	ENSMODG00000001668	RNF40	23.2195	24.9212	36.1182	11.6212	48.0666	15.19	16.6441	36.2869	38.5433	28.752	55.3258	46.805
ENSMODT00000002086.3	ENSMODG00000045651		0.0526029	0	0	0	0	0	0	0	0	0	0	0
ENSMODT00000002089.3	ENSMODG00000001674		0	0	0	0	0	0.0249099	0	0	0.0244372	0	0	0
ENSMODT00000002090.3	ENSMODG00000001673	PSME4	1.98718	2.87651	23.3494	5.40408	45.594	5.1024	18.234	39.3805	30.3237	26.6409	17.0565	31.0392
ENSMODT00000002096.4	ENSMODG00000001677		0	0	0	0	0	0	0.0433809	0	0	0	0	0
ENSMODT00000002100.5	ENSMODG00000001681	MAP1B	0.957654	1.08536	0.346316	0.0915977	0.198812	1.12759	0.175501	0.60839	4.11909	5.86473	5.26563	5.13755
ENSMODT00000002108.4	ENSMODG00000001687	MRPS27	9.32779	12.105	11.7409	6.83115	7.82241	4.4241	5.41582	8.33863	12.1388	13.3015	30.1221	15.7542
ENSMODT00000002110.3	ENSMODG00000001689		0.120685	0	0.269628	0	0	3.66712	0.158633	4.269	2.74426	0.549222	2.31484	1.09562
ENSMODT00000002111.3	ENSMODG00000001690	TDO2	0	0	0	0	0	0	0	0	0	0	0	0
ENSMODT00000002112.4	ENSMODG00000001694	CTSO	21.9325	20.8229	4.8847	2.56413	13.5242	6.72511	6.44139	9.46389	15.5408	12.569	21.0869	17.3825
ENSMODT00000002113.4	ENSMODG00000001692	CNTN2	0	0	0	0	0	0	0	0	0	0	0	0
ENSMODT00000002114.4	ENSMODG00000001693	GHITM	60.6311	65.4746	117.093	90.8358	249.823	131.74	213.827	198.184	207.109	198.169	111.656	141.574
ENSMODT00000002118.4	ENSMODG00000001691	NPAS2	4.38756	3.33817	1.78058	0.847563	7.89655	1.80827	2.92522	7.63236	5.36182	4.43052	3.32429	6.17024
ENSMODT00000002119.3	ENSMODG00000001698		0	0	0	0	0	0	0	0.197665	0.227043	0.572649	0.168873	0
ENSMODT00000002121.3	ENSMODG00000001699	CTF1	7.50759e-05	0.00141279	0	0.143438	3.08679	0.278583	5.634	11.1003	2.83831	11.2972	3.62021	8.31751
ENSMODT00000002122.4	ENSMODG00000001697	STK32B	0	0.0167157	0	0	0	0.0343898	0	0.517343	0.484485	0.0876379	0	0.395114
ENSMODT00000002126.4	ENSMODG00000001700	AGMO	0.136948	0.354277	0	0	0	0	0	0	0	0	0	0
ENSMODT00000002129.3	ENSMODG00000001701	SLC16A4	0.203222	0.284657	0	0.130432	4.066	14.4343	1.06945	8.1847	2.94445	4.81343	2.26965	7.7199
ENSMODT00000002130.4	ENSMODG00000001702	ZNF366	1.40409	1.70551	1.4424	0.165764	0	2.24295	0	1.70878	1.82595	1.88718	1.7885	1.33567
ENSMODT00000002132.1	ENSMODG00000001703		0	0.0781897	0	0	0	0	0	0	0	0	0	0
ENSMODT00000002133.4	ENSMODG00000001704	RPL31	2281.61	2246.98	1176.23	1692.88	419.399	556.829	691.514	392.914	473.18	498.06	835.088	873.465
ENSMODT00000002136.4	ENSMODG00000001708	RBBP5	19.9763	22.2725	15.4368	4.54905	9.81532	5.76227	5.80549	13.7082	20.7369	14.177	33.0245	30.4281
ENSMODT00000002138.4	ENSMODG00000001710		0	0	0	0	0	0	0	0	0	0	0	0
ENSMODT00000002140.3	ENSMODG00000001709		0	0	0	0	0	0	0	0	0	0	0	0
ENSMODT00000002143.4	ENSMODG00000001715	CDHR1	0	0	0	0	0	0	0	0	0	0	0	0
ENSMODT00000002146.4	ENSMODG00000001716	EVC2	10.8465	10.1137	1.09152	0.365243	0.817806	7.00019	1.50971	13.9336	15.8478	22.7433	13.1347	19.9329
ENSMODT00000002148.2	ENSMODG00000001718	LRIT2	0.0892779	0.116599	0	0	0	0.149653	0	0	0.288793	0.291817	0	0.19683
ENSMODT00000002151.5	ENSMODG00000001720	KCNC4	0.192846	0.0695276	0	0	0	0.0626123	0	0	0.158919	0.0948858	0.122213	0.645771
ENSMODT00000002152.2	ENSMODG00000001722	METTL7B	6.34885	10.5519	0.533927	1.03184	3.17203	10.7797	0.522546	8.10652	5.80408	5.63992	13.9056	12.3641
ENSMODT00000002153.3	ENSMODG00000001721	TNPO1	25.744	33.0962	38.545	7.86187	75.9909	32.3636	31.2562	122.63	96.9228	77.3284	81.1417	93.6057
ENSMODT00000002154.4	ENSMODG00000001723	PDGFC	158.236	142.007	12.6338	14.5179	2.24711	13.4519	14.4452	14.4456	17.7918	11.8684	104.73	90.4389
ENSMODT00000002155.4	ENSMODG00000001724	TBC1D8	4.21905	3.48891	3.93633	0.0342665	0	0.113533	0.433586	1.77162	2.03211	0.591366	3.14577	4.88062
ENSMODT00000002156.3	ENSMODG00000001727		4.07925	3.74956	1.74319	1.13764	10.2259	15.6192	10.6071	9.09337	8.44446	5.46138	9.09242	13.943
ENSMODT00000002157.5	ENSMODG00000001726		22.1965	26.0463	8.4166	2.06069	12.4736	7.47072	4.97811	15.0329	18.9211	12.5605	22.4562	25.437
ENSMODT00000002158.2	ENSMODG00000001729	LRIT1	0.0272297	0.0789377	0	0	0	0.454996	0	0.197311	0.957332	1.06303	0	0
ENSMODT00000002160.2	ENSMODG00000001729	LRIT1	0	0.000453793	0	0	0	0	0	0	0	0	0	0.208549
ENSMODT00000002161.4	ENSMODG00000001725	SLC12A6	6.96112	4.88435	3.22236	0.987756	27.2981	3.97047	6.40073	21.1412	34.2707	12.6708	15.197	15.5794
ENSMODT00000002162.4	ENSMODG00000001731	EVC	6.37981	5.12646	1.27623	0.759921	0.754563	3.36487	0.996536	1.99705	6.69437	4.75776	12.376	14.3706
ENSMODT00000002164.5	ENSMODG00000001730		1.94811	1.2341	0.181254	0.166159	0.679738	0.625473	0.416812	2.34767	1.6505	1.00525	3.16582	3.48391
ENSMODT00000002168.4	ENSMODG00000001735	MYC	66.9546	57.4262	7.64137	6.24978	9.73606	8.12604	5.63074	12.0361	32.0676	23.993	41.7398	34.9548
ENSMODT00000002169.4	ENSMODG00000001734		27.0826	29.7627	21.0918	7.36799	8.38288	17.3382	8.78659	12.8828	8.96316	12.0513	8.76574	18.2447
ENSMODT00000002170.3	ENSMODG00000001736	SPTBN1	1.11038	1.81172	1.17137	0.021782	0.794477	0.545844	0.177333	2.56363	2.01726	3.1836	4.16391	7.99056
ENSMODT00000002171.4	ENSMODG00000001737	CNOT11	29.8902	33.415	23.2405	7.96502	19.159	14.9735	12.075	25.8463	30.2406	18.8862	28.5598	28.2071
ENSMODT00000002176.3	ENSMODG00000001741	TRIB1	29.2378	25.8836	2.6452	1.28248	31.4544	53.1825	32.1786	75.4286	123.746	117.292	21.6364	29.3169
ENSMODT00000002177.4	ENSMODG00000001738	HSD3B7	20.5635	17.1	25.1502	24.2752	56.7299	41.6208	52.8894	48.0926	46.7747	27.2817	17.2991	17.2651
ENSMODT00000002179.4	ENSMODG00000001742	FCHO2	3.05045	0.000664648	3.97314	1.01079e-09	17.3202	3.17666e-06	0	15.9078	14.2846	16.5351	20.9273	28.3993
ENSMODT00000002180.3	ENSMODG00000001744	SLC6A17	0	0.0514414	0.0187976	0.070006	0	0	0.022807	0	0	0	0.41078	0.398524
ENSMODT00000002183.4	ENSMODG00000001747	TMEM171	0.266478	0.306474	8.62867	10.1542	1.65105	4.86639	2.27369	4.38435	2.65408	3.30747	0.401116	0.0815267
ENSMODT00000002185.4	ENSMODG00000001748	BBX	5.96671	6.32388	2.55605	0	0	1.00529	0.31888	3.7543	1.87506	1.84363	12.5162	21.2948
ENSMODT00000002187.4	ENSMODG00000001750	RNF149	66.2834	76.9682	65.5603	42.2992	66.9752	58.7251	53.8536	112.81	92.9433	103.415	82.4244	76.8088
ENSMODT00000002191.4	ENSMODG00000001755	ALX3	0	0.0297364	0	0	0	0.0769585	0	0	0	0	0.16851	0
ENSMODT00000002192.4	ENSMODG00000001752	COL2A1	0.335413	0.208951	0	0	0	0.0386471	0.00983763	0	0.0331025	0.0276751	0.0744709	0.0418728
ENSMODT00000002193.3	ENSMODG00000001756	TMEM174	0	0	2.04529	0.504402	2.47402	7.1144	3.40289	3.83844	1.1769	1.27621	0	0
ENSMODT00000002194.5	ENSMODG00000001757	TMCC2	3.48796	1.5688	0.556578	0.60304	4.37744	1.52013	0.94803	0.855269	1.62018	0.517765	1.70581	2.59931
ENSMODT00000002200.2	ENSMODG00000024544		0	0	0	0	0.73863	0	0	0	0.706296	0.150077	0.401362	0.450301
ENSMODT00000002204.3	ENSMODG00000001765		0.288477	0.0576106	0.188819	0	0	0	0	0	0	0	0.47312	0.439344
ENSMODT00000002207.3	ENSMODG00000001767	ERGIC3	54.0438	51.4508	56.5403	45.7906	123.272	42.3259	60.3307	84.8786	96.7673	74.4898	80.9146	72.4106
ENSMODT00000002209.4	ENSMODG00000001770	LPCAT4	55.2308	63.5039	4.22412	7.28396	6.4604	20.0127	6.04457	18.2816	20.521	19.5151	56.2196	67.5754
ENSMODT00000002215.3	ENSMODG00000001771		56.6055	42.1644	38.5558	31.0367	142.937	105.36	67.4646	115.024	116.17	158.552	76.5341	45.5564
ENSMODT00000002216.4	ENSMODG00000001775	STX1B	0.480518	0.545515	0.0778494	0.132666	0	0	0	0	0	0	0	0
ENSMODT00000002219.4	ENSMODG00000001777	ANKRA2	14.2258	14.8706	17.7826	17.4927	14.3401	10.7809	14.5253	16.2799	27.1844	22.4536	22.0003	25.83
ENSMODT00000002220.4	ENSMODG00000001778	KLHDC8A	1.44094	1.30445	1.60381	0.532938	1.45918	1.05707	1.80088	3.23133	5.32262	2.74614	2.95583	7.79808
ENSMODT00000002221.3	ENSMODG00000023630		2.14822	2.41375	0.797459	0.0252756	0.384409	0.309354	0.438468	5.00107	13.2546	8.45291	16.3778	13.3735
ENSMODT00000002224.4	ENSMODG00000001782		0.0104329	0.0744667	0	0	0	0.0556656	0.0139718	0.0975386	0.154667	0.262219	0.638905	0.621601
ENSMODT00000002227.2	ENSMODG00000001783	EML6	4.43326	2.95008	0.296775	0.0261723	0.217484	0.0310144	0.0470529	0.138899	0.420053	0.0110138	6.15385	15.5531
ENSMODT00000002231.4	ENSMODG00000001788	CEP250	3.56562	4.65147	1.25878	5.01538e-07	1.83429e-07	2.50539	0.000215296	4.67547	2.32167	2.5983	16.9712	13.5025
ENSMODT00000002232.4	ENSMODG00000001789	UTP15	13.499	14.8413	12.5006	5.80181	10.8642	10.1725	7.26513	22.1842	33.535	30.3066	39.9235	27.4299
ENSMODT00000002235.4	ENSMODG00000001792	GDF5	1.54595	0.865978	0.193282	0.177104	0	0.0664815	0	0.120717	0.274795	0.285964	3.08037	2.85171
ENSMODT00000002237.3	ENSMODG00000001794	STX4	67.6202	61.9591	65.6601	70.7611	62.0452	61.2291	76.398	130.27	163.287	90.6673	99.3851	104.681
ENSMODT00000002238.4	ENSMODG00000001795	CDK18	7.45256	7.9773	31.4011	5.91717	41.1762	10.7661	12.0573	12.1221	22.0968	33.951	10.8152	7.66744
ENSMODT00000002241.4	ENSMODG00000001799	ZNF668	12.2791	13.4456	8.27649	7.71567	13.6175	12.3281	10.8829	10.982	10.5994	10.9703	6.59635	9.74282
ENSMODT00000002242.4	ENSMODG00000001797	STRIP1	39.6362	42.2421	22.0365	16.7139	16.6791	13.6795	17.0301	22.1411	22.9868	22.0337	39.5335	32.0297
ENSMODT00000002244.4	ENSMODG00000001800	WASHC5	23.9477	29.1026	27.7217	10.9155	22.9244	16.8537	14.7976	38.752	40.7548	41.0648	34.2564	36.7219
ENSMODT00000002247.4	ENSMODG00000001803	RTN4	3.11658	4.63904	0.992788	0.408636	4.06409	1.2635	2.17962	6.13564	5.60833	8.37581	3.77343	5.74718
ENSMODT00000002248.4	ENSMODG00000001804	MFSD4A	0.924886	4.21487	1.98797	1.10821	1.17242	0.201443	0.622021	0.387882	0.704905	2.43288	44.1087	72.2824
ENSMODT00000002249.4	ENSMODG00000001805	TMC6	4.77878	4.38097	1.11659	1.39659	0.866085	3.66303	3.85318	7.70629	8.86816	9.83799	7.02497	10.0252
ENSMODT00000002251.3	ENSMODG00000016594		0	0.198457	0.0545609	0	0	0.189354	0.127883	0.0799518	0.139478	0	0	0.0662918
ENSMODT00000002254.4	ENSMODG00000001810	PRSS53	1.00092	0.489486	0.121722	0.104916	0.268167	0.487215	0.501378	0.972285	1.30265	0.676609	0.682047	0.646395
ENSMODT00000002257.3	ENSMODG00000001811	SQLE	48.9865	47.1052	41.5082	59.221	35.6389	44.0107	21.9677	45.9274	18.3513	32.2158	93.3595	67.3452
ENSMODT00000002258.3	ENSMODG00000001813	CLHC1	0.558344	0.197238	0.099385	0.0657478	0.264312	0.168142	0.280565	0.430181	1.32241	0.622464	0.930391	1.51831
ENSMODT00000002259.4	ENSMODG00000001814	ZNF572	13.7069	12.4608	3.15916	3.12179	0.748869	3.10137	1.31264	4.48807	6.31061	8.09202	16.6879	22.2623
ENSMODT00000002260.4	ENSMODG00000001815	FAM214A	25.4371	25.117	17.4268	6.92714	194.143	18.7419	79.9595	94.8606	66.5533	29.1936	43.2822	79.4069
ENSMODT00000002262.5	ENSMODG00000001817	ELK4	9.02172	10.6283	6.00776	0.0786815	5.52142	2.83877	0.739631	8.15996	13.419	13.4448	28.1299	26.3818
ENSMODT00000002263.4	ENSMODG00000001816	CBLB	5.79134	7.05748	4.52542	1.13338	7.23301	5.10053	2.99735	2.9159	3.35819	8.15761	11.4605	16.9219
ENSMODT00000002265.3	ENSMODG00000001819		2358.7	2339.59	866.819	1373.45	713.964	562.257	784.792	460.012	938.486	899.561	1170.9	1133.63
ENSMODT00000002267.4	ENSMODG00000001820	TMC8	0.230341	0.181593	0	0	0	0.174115	0.11014	0.235118	0.439685	0	0.694049	0.19314
ENSMODT00000002268.4	ENSMODG00000001821	AHCYL1	38.9892	16.0332	29.9855	1.51613	96.7165	2.83246	8.71859	63.2107	86.8908	58.0321	144.268	128.4
ENSMODT00000002269.3	ENSMODG00000001809		0	0	3.5574	12.5066	18.9101	7.84114	6.07415	1.87638	1.77711	3.50044	3.77415	2.08622
ENSMODT00000002270.3	ENSMODG00000001823	ARPP19	50.8417	57.9539	32.9285	20.9556	36.1621	41.1126	43.2248	45.2359	49.6152	44.6238	63.3977	79.3175
ENSMODT00000002273.4	ENSMODG00000001824	SLC45A3	3.27428	1.70974	3.04682	1.63557	4.87432	21.5448	9.34903	24.458	52.7619	47.6119	4.4094	12.2521
ENSMODT00000002275.4	ENSMODG00000001825	CUL1	50.0636	59.3103	34.3867	9.97475	27.0341	17.3142	12.7167	65.3349	68.8244	46.2583	100.838	106.75
ENSMODT00000002279.4	ENSMODG00000001828	MTSS1	6.56948	3.31117	0.609829	0.154275	0.0107224	14.3976	10.7085	20.3658	13.4962	17.1776	7.53428	10.3714
ENSMODT00000002283.4	ENSMODG00000001832		302.136	354.417	231.172	194.769	156.028	195.568	222.28	295.012	338.84	264.95	472.833	488.029
ENSMODT00000002284.3	ENSMODG00000001833	MTIF2	7.32677	8.65641	8.75251	5.55944	3.5159	5.28556	5.38837	11.1661	14.1496	11.949	18.4556	17.6069
ENSMODT00000002285.1	ENSMODG00000001835		45.2619	43.176	85.0068	93.7306	152.461	90.8945	113.171	63.1643	74.7481	75.2926	41.9363	41.0549
ENSMODT00000002289.4	ENSMODG00000001838	ARHGEF28	0	0	0	0	0	0	0	0	0	0	0	0
ENSMODT00000002290.3	ENSMODG00000001837	BCKDK	25.0595	28.6603	77.9117	60.0353	30.4951	17.0857	33.4982	24.6097	29.8541	24.758	43.0329	31.9476
ENSMODT00000002295.3	ENSMODG00000001840	TATDN1	49.8008	56.2581	45.3047	67.0741	10.7703	17.4633	22.3239	21.9353	37.171	27.2954	48.004	43.7868
ENSMODT00000002297.4	ENSMODG00000001842		0.216872	0.0526796	0	0	0.724678	0.328403	0.0690655	0.925829	1.26951	3.22459	0.039802	0.26781
ENSMODT00000002298.3	ENSMODG00000001843	RAB29	5.65893	2.83869	6.28185	0.379574	2.53473	5.70189	5.72486	13.3073	19.0186	11.1675	8.55888	11.2559
ENSMODT00000002299.3	ENSMODG00000001844	MMP24	0	0.0206107	0.0452325	0.0413374	0	0.297215	0	0.197668	0.180526	0.11155	0.169431	0.152342
ENSMODT00000002300.4	ENSMODG00000001846		36.8598	35.056	129.827	110.78	253.15	127.81	165.319	197.074	167.087	161.342	33.8701	29.783
ENSMODT00000002301.5	ENSMODG00000001847	RNF139	33.4968	36.4995	29.2064	19.3517	28.8043	22.2229	20.8618	44.7598	49.1885	43.7061	41.7803	46.5014
ENSMODT00000002303.4	ENSMODG00000001848		2.28538	2.01795	3.06735	2.05587	0	2.29172	5.20886	1.92622	1.00225	2.15985	2.12891	1.40776
ENSMODT00000002311.3	ENSMODG00000001854		5.49989	14.1149	18.6627	19.1674	16.4763	15.5909	10.5235	21.6193	19.1887	15.3447	41.061	40.102
ENSMODT00000002314.3	ENSMODG00000001856	KAT8	64.6876	61.5603	39.0356	49.7587	48.7392	33.4535	46.2812	59.816	87.8502	63.2081	93.1899	93.2097
ENSMODT00000002317.4	ENSMODG00000001859	SLC41A1	10.0114	9.37998	1.11305	0.198842	1.96996	4.42729	2.13336	6.16425	3.47395	3.64754	11.2208	10.899
ENSMODT00000002318.4	ENSMODG00000001846		9.98063	15.534	53.0905	62.0844	21.0887	12.5634	12.8519	14.4738	21.3525	14.6509	12.3221	11.4759
ENSMODT00000002320.2	ENSMODG00000001863		0	0.0730203	0	0.083984	0.372312	0	0	0.101762	0	0	0.17569	6.62223
ENSMODT00000002321.4	ENSMODG00000001864	PDIA4	124.968	175.167	511.87	101.639	562.631	44.5965	161.304	95.2544	103.906	72.3761	230.196	200.094
ENSMODT00000002322.3	ENSMODG00000001878	TRPC4AP	23.8031	24.1181	45.2576	51.3356	85.3821	67.9808	79.4673	93.0244	66.324	56.0225	29.9713	31.1564
ENSMODT00000002323.4	ENSMODG00000001866	STXBP6	8.8698	11.3891	2.02144	1.54482	8.52918	56.1782	40.3644	62.9104	25.2377	42.1461	16.2959	26.4966
ENSMODT00000002325.3	ENSMODG00000001868	TMEM65	0	0.205053	0.496952	0.210434	0	0	0	0	0	0	0	0.520391
ENSMODT00000002327.4	ENSMODG00000001870	PM20D1	7.1064	7.20627	5.13377	1.23575	9.94177	18.7837	5.02666	27.0938	20.1577	22.4682	9.36029	15.3508
ENSMODT00000002329.4	ENSMODG00000001872	HEXB	183.173	146.323	134.173	105.903	788.838	145.215	603.219	1169.61	340.101	335.956	132.807	111.063
ENSMODT00000002331.4	ENSMODG00000001874	PRSS8	54.5298	55.5366	100.517	78.0421	272.902	170.871	252.955	249.408	136.457	129.207	44.5501	33.4365
ENSMODT00000002332.4	ENSMODG00000001877	ZPLD1	0.173761	0.105985	1.14782	1.5929	1.57297	1.84099	1.64737	3.50114	2.69898	1.57665	0.537229	0.689616
ENSMODT00000002334.4	ENSMODG00000001876	GSTM3	1.10138e-08	0	0	0	0	0	0	2.2176	63.4041	0.711269	88.7233	81.0193
ENSMODT00000002335.4	ENSMODG00000001878	TRPC4AP	22.4231	25.4038	25.5797	6.21938	27.6389	19.4768	14.0001	29.5367	27.0818	22.0448	19.1107	29.0572
ENSMODT00000002337.2	ENSMODG00000001879		0.0693007	0.132976	0	0	0	0.0698837	0	0	0.471971	0.346487	0.534027	1.51027
ENSMODT00000002338.4	ENSMODG00000001875	PARP6	3.30585	4.7807	0.723467	1.79082	7.1296	0.371161	1.79926	3.92971	2.79352	1.37496	0.0430977	1.29853e-06
ENSMODT00000002343.4	ENSMODG00000001881	SOCS3	9.50976	9.45062	1.2924	0.797452	8.50755	33.7409	5.74401	29.8792	56.4899	72.031	10.5745	17.7867
ENSMODT00000002348.4	ENSMODG00000001889	FUS	106.604	176.981	103.495	56.39	71.6839	73.1073	54.4917	144.846	161.497	151.95	346.392	269.672
ENSMODT00000002350.4	ENSMODG00000001888	NFKBIZ	5.14107	3.75684	2.56282	1.65975	9.86683	15.9131	9.0333	53.9194	113.861	28.8289	25.8751	38.9383
ENSMODT00000002351.4	ENSMODG00000001890		3.3278	2.98269	7.3835	4.56187	103.567	1.14179	12.3653	2.69564	1.00754	1.28654	1.87233	1.70524
ENSMODT00000002353.3	ENSMODG00000001884	POLR3B	2.77046	4.149	8.88948	4.41111	3.56835	1.47681	1.62075	2.41444	3.97217	4.07411	13.6105	7.98724
ENSMODT00000002355.4	ENSMODG00000001886	MLLT1	55.3385	55.9864	20.2971	4.04447	22.1035	18.3102	11.8525	34.8536	47.3632	42.702	59.8523	74.127
ENSMODT00000002356.4	ENSMODG00000001891	NXPE3	6.67274	6.13991	5.28285	0.67718	1.01016	1.48742	0.821965	3.04515	3.23723	3.60709	20.8097	37.0743
ENSMODT00000002358.3	ENSMODG00000001894	CFAP36	82.3443	62.0214	8.02105	26.2418	34.2544	41.5468	60.5951	63.8629	63.7356	63.9075	127.86	181.704
ENSMODT00000002359.4	ENSMODG00000001892	GFM2	5.65505	5.84658	6.67284	3.26994	0	0.865056	0.726566	5.39462	8.09888	3.95982	14.1174	11.3953
ENSMODT00000002360.4	ENSMODG00000001895	PKM	34.3295	44.6124	27.3888	12.851	8.77221	20.9988	36.0245	0.486483	0.295342	0.219111	0.228314	0
ENSMODT00000002361.4	ENSMODG00000001896	GABBR2	0.31833	0.453992	0.843952	0.338153	0.401367	1.52753	1.89628	1.93067	0.721449	0.542364	1.01085	0.467338
ENSMODT00000002364.4	ENSMODG00000051201		30.0879	26.3998	28.2342	13.9481	23.0118	22.1996	18.6662	33.3094	35.2987	26.3675	97.6789	69.8705
ENSMODT00000002368.3	ENSMODG00000001900	NSA2	4.00917	0.777674	0	0	21.9434	0	0	76.9824	95.9197	67.4075	161.057	197.084
ENSMODT00000002369.4	ENSMODG00000001901	GRAMD2A	0.550966	1.90175e-06	0.136985	0.0872303	0.949213	1.10188	0	2.16945	13.8772	9.80213	3.60528	4.61955
ENSMODT00000002370.4	ENSMODG00000001899		3.69365	4.12172	1.4018	2.38577	58.9278	2.69388	3.89514	26.1227	38.4897	9.44125	5.12648	6.69359
ENSMODT00000002371.4	ENSMODG00000001902		0	0	0.0655719	0	0	0	0	0	0	0.40191	0.269779	0
ENSMODT00000002373.4	ENSMODG00000001903	CEP97	6.4355	5.47757	1.01835	0	0	1.26248	1.89666	1.04228	2.02026	2.91404	5.76529	6.0809
ENSMODT00000002374.2	ENSMODG00000001905	SENP8	6.87151	8.68034	6.99425	5.01016	14.6708	7.76791	7.98076	11.1203	17.42	14.2923	7.26234	8.39367
ENSMODT00000002377.4	ENSMODG00000001906	EFCAB14	41.8477	41.3571	35.402	17.7548	50.4939	13.1689	13.7305	38.6166	46.1173	36.4381	52.6841	61.4848
ENSMODT00000002382.4	ENSMODG00000001909	TCP11L2	35.4785	34.998	4.37754	1.62565	9.68657	19.3531	24.2798	24.2802	31.2269	12.3628	10.748	16.9191
ENSMODT00000002386.4	ENSMODG00000001912	MYO5C	4.3944	3.53246	12.6909	3.30283	6.80815	1.75184	3.36976	10.5903	27.928	12.5169	15.6686	20.1327
ENSMODT00000002387.4	ENSMODG00000001914	FAM169A	1.25555	1.13543	3.0899	0.367785	3.20912	0.845686	0.534065	2.29743	2.30226	3.02059	1.92947	2.61695
ENSMODT00000002388.3	ENSMODG00000001915	RAB7B	9.42132	10.1707	1.584	0.579574	0.611763	7.00544	2.84448	8.90264	11.298	12.7902	22.8426	8.61006
ENSMODT00000002389.3	ENSMODG00000001913	ACER1	0	0	0.0220605	0.0223346	0	0	0	0.10575	0	0	0.425024	0.204616
ENSMODT00000002390.5	ENSMODG00000001917		20.7639	20.6833	105.331	22.7286	31.185	21.2598	13.44	28.5748	28.9228	29.7778	50.3591	49.9494
ENSMODT00000002391.2	ENSMODG00000001916	RPL24	770.431	810.044	505.456	329.781	1420.6	92.0136	159.347	868.952	1153.11	1036.02	1660.61	1698.67
ENSMODT00000002392.4	ENSMODG00000001918	ATPAF1	28.8272	30.6268	32.8593	31.0013	23.9187	32.5849	34.1309	33.9482	35.4521	34.6175	26.4317	35.1039
ENSMODT00000002394.4	ENSMODG00000001919	FAM91A1	17.1081	18.1535	32.4029	6.31572	12.1661	11.2474	7.66161	25.4064	41.3124	31.1896	41.4207	49.23
ENSMODT00000002396.5	ENSMODG00000001922	AMPD2	14.4937	14.5788	16.9207	10.0991	77.3549	37.418	132.038	38.3124	14.4841	20.8849	12.9408	12.948
ENSMODT00000002397.3	ENSMODG00000037547		22.5917	25.1848	21.0859	14.6057	9.95995	9.46176	9.62429	19.0838	26.0693	21.6589	51.5778	44.0076
ENSMODT00000002399.4	ENSMODG00000001925		0	0	0	0	0	0	0	0	0	0	0	0
ENSMODT00000002400.5	ENSMODG00000001926	NUAK1	6.36725	7.37813	1.44025	0.51263	6.43485	11.9119	17.9741	17.8365	5.43882	7.89349	4.32503	6.02429
ENSMODT00000002401.4	ENSMODG00000001927	ZBTB11	4.91873	4.8479	5.88143	1.07584	6.98206	3.13856	3.10216	6.14661	10.5155	8.06369	17.1516	16.5573
ENSMODT00000002404.2	ENSMODG00000001931		0.0633943	0.0604623	0.135754	0	12.1532	0	0.16047	0.203487	0	0.126941	0	0.120071
ENSMODT00000002405.4	ENSMODG00000001929	ANXA13	0.198617	0.310227	0.0315896	0.0313001	0	0.292589	0.110524	0.285614	0	0.182095	0.409661	0.505797
ENSMODT00000002406.3	ENSMODG00000001933	GNAT2	0.0356703	0	0.915159	0.583544	0	1.58408	1.03638	1.99402	0.132644	1.0105	0	0
ENSMODT00000002407.4	ENSMODG00000001932	PCSK5	0	0	0.171623	0.107042	0	0	0	0	0	0.0891512	0	0.724974
ENSMODT00000002408.4	ENSMODG00000001934	MYO9A	1.22822	0.866065	0.789371	0.0523155	0.59652	0.87843	0.529794	2.26311	3.85365	2.78855	3.01496	2.31949
ENSMODT00000002409.3	ENSMODG00000001935	PPP4R3B	81.5992	92.9846	87.7923	22.7464	42.652	40.1123	27.3973	73.3678	76.9835	65.2028	114.052	133.062
ENSMODT00000002411.3	ENSMODG00000001936		0	0	0	0	0	0	0	0	0	0	0	0
ENSMODT00000002412.4	ENSMODG00000001937	TC2N	23.4659	19.3321	693.711	333.921	3627.08	162.499	1054.5	1217.76	1201.96	658.917	35.1144	54.1262
ENSMODT00000002414.4	ENSMODG00000001939	CTSE	0	0	0	0	0	2.8138	7.31839	1.94184	0	0.188832	1.70707	0
ENSMODT00000002419.3	ENSMODG00000001941		13.9085	6.60303	4.28304	0.696193	2.41968	0.938416	2.61249	3.28581	4.45903	2.69616	11.5751	22.3833
ENSMODT00000002420.4	ENSMODG00000001944	KLHL38	0.110231	0.0679948	0.193335	0.0443911	0.447354	0.889548	0.391715	0.525203	1.4816	2.65479	0.236481	0.339254
ENSMODT00000002422.3	ENSMODG00000001942	GASK1B	14.5308	19.5102	13.0685	4.87564	3.72023	8.45503	2.75765	14.7988	14.9018	18.1824	22.7171	27.169
ENSMODT00000002423.4	ENSMODG00000001947		2.56105	2.50122	1.41373	1.0536	3.0067	2.02313	2.82097	4.6761	5.23151	4.25438	3.02237	5.4642
ENSMODT00000002424.4	ENSMODG00000001948	GNB5	1.54057	0.547855	0.790784	0.336248	0.305417	4.06703	0.472048	3.7579	4.50488	5.95058	3.41599	4.94561
ENSMODT00000002426.4	ENSMODG00000001949	NR2E3	1.23772	0.369732	0.0755591	0.100614	0	0.106159	0.0450757	0.115997	1.24867	0.327448	0.296712	0.886273
ENSMODT00000002427.3	ENSMODG00000001950		10.2178	10.9635	3.58773	3.74205	20.3653	106.403	14.6861	49.7546	102.654	174.135	13.9881	21.2431
ENSMODT00000002428.4	ENSMODG00000001951	MKNK1	5.06817	5.02186	3.86939	3.37434	6.53155	7.87021	8.581	8.53726	8.13665	8.64923	4.20419	6.00697
ENSMODT00000002429.5	ENSMODG00000001952	KHSRP	94.5605	104.09	43.5737	22.9421	37.7945	41.94	31.5609	35.3252	42.5101	38.4644	51.7605	70.4011
ENSMODT00000002431.4	ENSMODG00000001954		0.973654	0.871953	0.199415	0.118475	1.01098	0.751226	1.26356	2.83486	3.16241	2.15968	0.738927	0.965216
ENSMODT00000002433.4	ENSMODG00000001956	TMEM144	10.3242	10.8142	120.94	63.0554	0.000279445	5.85409	8.65089	10.6219	14.2551	17.5077	10.4215	15.6036
ENSMODT00000002434.4	ENSMODG00000001955	OSTF1	52.4454	50.3594	119.383	115.343	92.7437	43.6133	70.1224	65.6852	62.9698	57.9344	56.9132	47.367
ENSMODT00000002436.4	ENSMODG00000001957		0.192418	0.154855	0.0911673	0.0709975	0	0.133107	0.1795	0.98703	1.06502	1.06176	0.967742	1.00172
ENSMODT00000002437.3	ENSMODG00000001959	SLC25A41	1.07048	0.929105	1.20642	0.729037	0.150966	0.825215	0.549805	0.410231	0.459614	0.482506	1.27418	1.46816
ENSMODT00000002438.4	ENSMODG00000001960	AVPR1B	2.5933	2.49013	8.61812	3.08287	0.539405	0.399479	0.745735	1.65183	1.53544	1.33265	2.39022	2.71559
ENSMODT00000002439.4	ENSMODG00000002051		7.77902	5.50274	0.0119214	2.02027	0.0406556	0.114209	1.4341	0	4.65481	3.1481	16.05	13.3132
ENSMODT00000002440.3	ENSMODG00000001962		25.0701	27.4616	26.6892	14.4916	51.208	42.1197	21.8603	68.3908	92.2395	124.173	65.168	54.5108
ENSMODT00000002441.6	ENSMODG00000001963	DMBX1	0.0354325	0.098922	1.09198	1.06641	0	0	0.0449229	0	0	0	0.0507835	0.563639
ENSMODT00000002442.4	ENSMODG00000001961		2.22135	2.12954	0.865666	0.0522604	0.851745	0.584693	0.460508	2.6858	3.12348	3.00909	5.89908	5.86398
ENSMODT00000002445.4	ENSMODG00000001964	SENP7	4.35107	6.07081	4.46174	0	0	0.579194	0.442175	4.01192	7.55997	2.65157	14.096	9.04031
ENSMODT00000002447.4	ENSMODG00000001966	NMRK1	38.8176	46.4928	81.1489	90.4044	93.824	57.6831	623.905	274.59	49.8854	40.4457	50.6088	34.1002
ENSMODT00000002450.3	ENSMODG00000001969		0.0790035	0.163088	0.0914133	0	3.05876	0	0	0.284512	0	0	0	0
ENSMODT00000002451.2	ENSMODG00000001970		0.190292	0.573522	0.104458	0.0710456	0	0.327985	0.0817866	0.207053	0.293188	0.498115	0.88836	1.60241
ENSMODT00000002454.3	ENSMODG00000001972	FBXO32	21.2333	26.6471	2.43863	0.156409	44.4781	12.5949	10.4183	24.1933	43.8423	25.23	53.8318	44.0799
ENSMODT00000002456.4	ENSMODG00000001973	RXFP1	9.82437	9.0626	10.7277	7.69104	3.49231	0.784658	1.08369	6.05766	15.5268	4.16359	21.7666	16.4072
ENSMODT00000002457.3	ENSMODG00000001974	ZNF398	9.21848	9.46731	5.50407	1.0174	6.95364	3.42955	2.55238	7.4211	7.68108	6.95888	15.535	16.0209
ENSMODT00000002458.3	ENSMODG00000001975	GNAI3	1.01668	0.720223	12.5029	3.75291	3.91668	0.35005	0.940772	0.382738	0	0.145466	0.583009	0.146491
ENSMODT00000002463.4	ENSMODG00000001978	APPL2	85.0495	56.5387	71.9082	34.5498	139.403	16.681	45.6919	38.2171	50.2028	35.873	52.6343	72.7012
ENSMODT00000002464.4	ENSMODG00000001979	LEO1	16.6622	19.0653	22.9174	15.22	12.5211	14.3181	11.8188	31.8856	37.5422	34.8021	47.8686	42.1872
ENSMODT00000002465.3	ENSMODG00000001980	ERBB3	5.87423	0.672031	1.3037	4.6693	6.17465	5.68946	4.78579	9.16403	14.2114	7.76014	1.32583	0.752346
ENSMODT00000002466.4	ENSMODG00000001981		21.0946	27.7589	9.77939	13.6327	5.43243	8.31878	9.81095	9.33321	18.6325	14.2425	20.8207	24.3523
ENSMODT00000002469.4	ENSMODG00000001983	IMPG2	0	0	0	0	0	0	0	0	0	0	0	0
ENSMODT00000002470.3	ENSMODG00000001982		9.21145	11.2041	0.0539614	0.0514059	0.12894	0.0252596	0.031969	0	0.193576	0.0812068	1.94314	3.57553
ENSMODT00000002471.3	ENSMODG00000001984	PNPT1	10.3258	11.6412	11.8701	6.68686	7.06589	5.5179	5.79281	12.5029	17.411	13.6879	28.5037	32.156
ENSMODT00000002473.3	ENSMODG00000001987	ZNF282	11.0184	13.1139	10.199	2.28886	4.83232	3.41353	2.42431	7.23059	6.29784	7.4938	9.23505	14.0643
ENSMODT00000002474.4	ENSMODG00000001986		3.38861	2.1152	1.26551	0.230211	0.314867	0.344005	0.403366	0.699318	3.09446	2.0639	1.56236	1.90104
ENSMODT00000002475.3	ENSMODG00000001989	CYB561D1	0.751391	0	0	0.765077	0.16503	0.593607	0.0888161	3.84264	0.774761	5.79595	1.94069	1.61593
ENSMODT00000002476.3	ENSMODG00000001988	CYTH1	0.925061	1.30136	1.75818	0.216733	3.29658	1.35592	1.10738	11.1671	9.05483	10.9468	12.5411	12.464
ENSMODT00000002478.4	ENSMODG00000001990	CARNMT1	15.7916	19.0812	17.0933	3.00388	9.25299	4.25612	3.6461	8.24989	12.5815	10.8874	27.9494	31.7852
ENSMODT00000002481.4	ENSMODG00000040618	TMOD2	0	0	0	0	0.402737	0.708174	0	0.00828978	11.868	0.000959164	0.223997	1.42958
ENSMODT00000002482.3	ENSMODG00000001995		4.68145	6.91372	2.40886	2.24491	0.854657	2.14878	1.61197	2.50841	2.63055	3.75922	6.02083	7.13874
ENSMODT00000002483.4	ENSMODG00000001993		9.026	6.44565	3.9439	1.67522	3.14806	6.83412	3.66802	10.2228	11.312	13.1021	9.07072	19.145
ENSMODT00000002484.4	ENSMODG00000001994	TRIP11	7.32446	8.93145	37.6545	3.88058	12.0342	4.90187	3.57133	14.0188	18.3321	14.121	24.0955	20.7813
ENSMODT00000002485.5	ENSMODG00000001996	NSUN4	14.4251	13.8451	10.1494	13.1298	9.61678	6.08365	7.8953	9.24078	13.5214	12.2208	15.3745	14.0981
ENSMODT00000002488.3	ENSMODG00000001998		68.1375	71.4726	134.86	210.608	533.331	119.337	165.282	282.584	330.778	450.365	188.598	228.273
ENSMODT00000002489.4	ENSMODG00000001999	USP36	2.6259	1.55482	2.03105	0.150979	4.06605	1.50188	0.000151699	3.89578	4.3538	2.12532	11.363	6.38926
ENSMODT00000002491.3	ENSMODG00000002001		185.073	226.297	157.028	118.695	124.403	97.2041	128.238	140.42	200.125	146.791	218.33	209.745
ENSMODT00000002492.4	ENSMODG00000002000		2.72185	2.80872	0.855051	0.328749	1.04795	0.408251	0.674658	0.527154	0.921256	0.571285	7.12618	21.9061
ENSMODT00000002493.4	ENSMODG00000040618	TMOD2	2.31544	2.51226	1.28145	0.701574	0.931726	3.58757	1.2353	2.99215	3.85365	5.31604	6.39275	9.16197
ENSMODT00000002494.4	ENSMODG00000002003	ATXN7L2	4.08288	3.68607	2.05123	1.25545	3.61723	2.45108	2.50587	3.61622	4.79166	2.6372	3.40978	4.70802
ENSMODT00000002496.3	ENSMODG00000002005	EFEMP1	141.091	120.088	16.5971	9.97777	7.34536	17.5482	4.41874	38.4691	64.2395	40.3088	227.937	177.385
ENSMODT00000002497.4	ENSMODG00000002006		14.4262	20.1506	13.4096	5.59579	15.3899	11.225	5.90399	17.1648	16.6936	18.4313	21.481	22.0257
ENSMODT00000002498.3	ENSMODG00000002007	LYSMD2	18.2903	16.833	2.28339	2.47978	0.895648	6.05949	3.50466	3.93799	5.60742	7.49081	14.5139	11.9984
ENSMODT00000002501.4	ENSMODG00000002009	ETFDH	1.98305	2.69124	2.63167	1.13801	1.83342	2.58504	2.83223	4.3285	5.98457	4.1588	6.08376	6.37904
ENSMODT00000002502.2	ENSMODG00000002012		0	0	0	0	0	0	0	0	0	0	0	0
ENSMODT00000002503.2	ENSMODG00000002011		145.113	226.793	51.6552	210.628	1532.14	56.3299	122.618	717.407	1226.93	1182.38	1538.2	1747.88
ENSMODT00000002506.4	ENSMODG00000002014	TIMP2	88.6939	80.7152	22.2638	7.38856	15.4253	49.8618	26.5456	61.2623	68.4853	61.0217	229.841	162.201
ENSMODT00000002509.4	ENSMODG00000002016	IKBKE	5.86127	4.97987	2.30034	1.79208	4.77339	6.36692	6.51577	11.9431	24.8561	13.5088	5.49465	6.5636
ENSMODT00000002512.5	ENSMODG00000002018	LRRC41	13.1703	13.782	7.81655	6.98886	19.2901	6.80267	6.97397	9.1988	4.37165	8.70443	7.49778	8.76891
ENSMODT00000002516.4	ENSMODG00000002022		0.0566573	0	0	0	0	0.00995032	0.0508103	0.0868551	0.213298	0.163557	0.126126	0.183072
ENSMODT00000002518.4	ENSMODG00000002025	MED10	4.12593	5.40343	6.95642	7.17247	13.3277	8.59646	7.27636	10.9241	12.3226	13.842	7.01572	7.97932
ENSMODT00000002519.4	ENSMODG00000002026	SCG3	2.27427	1.57415	1.43567	0	0	1.0692	1.33731	2.79744	0.502796	2.09153	7.96996	7.17645
ENSMODT00000002521.4	ENSMODG00000002024	WASHC4	9.20702	10.117	10.2295	3.39731	11.0414	8.95722	7.1246	19.9198	22.0107	21.6743	25.9591	25.7852
ENSMODT00000002522.3	ENSMODG00000002023		26.4323	25.6383	6.8889	4.52616	13.8714	20.3228	20.8702	33.5005	30.2463	26.8473	17.8775	20.4734
ENSMODT00000002528.4	ENSMODG00000002027	ATAD2	2.74081	3.91031	0.903075	0.17124	0.892741	1.11353	0.848485	2.39883	2.54854	2.31967	9.32037	15.7362
ENSMODT00000002529.4	ENSMODG00000002032		6.77788	7.6845	2.49881	2.72168	1.62901	2.54663	1.95945	2.18083	5.54426	2.49307	5.36834	11.8051
ENSMODT00000002530.6	ENSMODG00000002031	TRPM6	0.156013	0.205727	0.164584	0.0136113	0.730758	2.24597	0.585745	2.33305	1.49755	3.47237	0.682	1.62008
ENSMODT00000002532.3	ENSMODG00000002034	PSMA5	115.53	121.156	162.972	196.304	99.2865	145.326	128.08	153.319	196.13	201.736	191.57	148.844
ENSMODT00000002533.4	ENSMODG00000002035	ZHX1	20.8935	22.5985	18.88	4.57682	8.63143	8.54376	5.68352	16.723	18.4815	14.0662	30.7493	30.9433
ENSMODT00000002535.3	ENSMODG00000002037	ENGASE	4.81895	4.65433	3.24018	1.08556	1.86617	2.70973	2.59563	5.33646	8.13682	7.28608	11.7677	15.9606
ENSMODT00000002536.4	ENSMODG00000002038	RASSF5	0.625158	0.322442	0	0.0283022	0.315389	0.205958	0.82677	0	0.172086	0.943655	0.310473	1.09194
ENSMODT00000002538.4	ENSMODG00000002039	NSUN2	7.12009	10.4881	68.065	17.9527	2.41042	2.35659	1.7357	5.11926	11.8098	6.84198	23.3201	14.7955
ENSMODT00000002540.3	ENSMODG00000002040		0	0	1.38298	0	4.02689	0	0	7.00529e-09	3.54289	0	0.231992	0
ENSMODT00000002541.4	ENSMODG00000002041	CCDC85A	3.12703	1.69788	0.406202	0.12292	0.240306	0.637773	0.478748	1.24994	0.312381	0.519879	2.19239	3.64913
ENSMODT00000002542.3	ENSMODG00000002042	CPSF2	36.6589	43.7588	50.2961	15.0705	19.9454	21.5742	13.2658	50.5433	53.1641	51.0245	100.468	100.919
ENSMODT00000002543.3	ENSMODG00000002043	SRD5A1	3.50104	4.93562	755.351	429.546	7.23487	6.37345	12.4886	6.98104	5.84288	6.06252	3.82069	3.78652
ENSMODT00000002545.4	ENSMODG00000002046	RORB	0.149357	0.163298	0.673107	0	0.504698	0.0340303	0.0428671	0.528884	0.266609	0.140456	0.0755244	0.594613
ENSMODT00000002546.4	ENSMODG00000029094		3.24951	3.87566	0.832113	0.726366	0.572182	0.759263	0.533372	2.16589	3.39152	2.36602	9.23799	8.31713
ENSMODT00000002547.3	ENSMODG00000002047		85.8406	74.5922	62.964	112.998	187.315	326.16	180.422	368.087	690.984	767.331	152.182	226.445
ENSMODT00000002548.4	ENSMODG00000002048	DENND1C	9.00573	6.81205	10.8755	4.14147	7.33287	26.7796	22.5866	52.4488	36.5843	40.6068	14.2955	17.2402
ENSMODT00000002550.4	ENSMODG00000002050	FAM83A	0.0957856	0.0301603	0.0337671	0	0	0.344851	0.0402608	0.107477	0.487816	0.100345	0.183618	0.256112
ENSMODT00000002552.3	ENSMODG00000025181		2.73795	2.94952	1.26277	0.653061	0.434228	1.72652	2.30713	6.7289	11.3368	6.20755	9.19009	15.5371
ENSMODT00000002553.4	ENSMODG00000002052	TENT4A	5.01755	5.55269	10.0846	1.89721	2.62148	5.34322	2.90802	3.38395	5.79889	5.16797	6.19133	10.0251
ENSMODT00000002554.4	ENSMODG00000002053	FNIP2	3.58767	4.18527	5.27089	0.390277	10.1166	6.48491	3.09632	14.6575	11.5465	13.2857	10.9586	12.8323
ENSMODT00000002558.3	ENSMODG00000002056		4.56613	7.22412	2.34803	1.14489	1.06744	1.08639	0.843078	0	0.444865	1.33307	2.17372	1.67863
ENSMODT00000002559.4	ENSMODG00000002055		0.127681	0.122087	0	0	0	0	0.319996	0.597217	0.343259	0.28176	0.514019	0.718977
ENSMODT00000002561.5	ENSMODG00000002058	DMXL2	2.42319	2.46977	1.60363	0.548538	1.5636	1.30841	1.05703	6.20403	7.1414	3.92912	11.2327	12.961
ENSMODT00000002562.3	ENSMODG00000002057	HMGCR	36.6413	36.2366	17.8463	5.62341	30.3788	38.9388	13.9394	56.5623	31.1613	40.4395	67.8165	73.1745
ENSMODT00000002564.4	ENSMODG00000002060		2.3788	2.28069	0.330601	0.186852	0.495751	3.42528	1.56715	5.59711	4.95683	4.25786	1.45215	1.88013
ENSMODT00000002567.4	ENSMODG00000002062	SORT1	13.5595	15.7879	38.4089	4.14214	35.9176	14.3379	6.95843	42.0536	46.5182	48.7191	14.8226	21.8023
ENSMODT00000002569.4	ENSMODG00000002081	ADCY2	8.43881	9.3333	1.71744	0.983958	13.1092	0.958933	1.99053	11.1347	10.3895	2.7553	6.46516	6.52259
ENSMODT00000002573.3	ENSMODG00000002069	RBP3	0.0529394	0.0338822	0	0	0	0.0176099	0.0222911	0	0.0189631	0.0317042	0	0.0160154
ENSMODT00000002574.4	ENSMODG00000002070	EIF2D	50.9852	57.4392	88.9258	60.5438	126.066	45.1974	76.65	86.4101	99.4006	72.2406	52.6554	54.6022
ENSMODT00000002576.4	ENSMODG00000002071	ALDH1L2	1.14515	2.03208e-07	0.669131	0.0733735	1.94096	1.01852	5.98759e-10	0.734913	0	1.62867	3.51359	2.22141
ENSMODT00000002580.4	ENSMODG00000007603	ALDH1L1	0	0	0	0	0	0	0	0	0	0.37461	0	0.680391
ENSMODT00000002582.4	ENSMODG00000002076		0	0.196622	0.220066	0	0	0	0	0	0	0	0	0
ENSMODT00000002584.4	ENSMODG00000002078		25.3171	28.5653	32.2972	56.5097	111.763	30.0492	43.5892	46.656	39.659	21.5916	13.7187	17.5215
ENSMODT00000002585.4	ENSMODG00000002080	DYRK3	26.6226	25.3791	17.4762	9.96523	3.3998	7.7617	4.87473	11.6147	10.4476	12.4289	34.1943	34.1916
ENSMODT00000002589.3	ENSMODG00000002082	TFG	56.3447	59.9627	165.655	88.5648	121.649	47.2357	65.8019	60.5238	67.4897	58.6316	97.8961	64.6529
ENSMODT00000002592.4	ENSMODG00000002085	GDF10	8.11953	7.83576	0.542806	0.527935	0	0.696428	1.56868	0.620698	1.32672	0.346983	9.07707	3.61083
ENSMODT00000002593.4	ENSMODG00000002087	MAPKAPK2	39.8253	37.7794	12.3526	7.93769	63.9313	49.8156	37.6289	63.1742	66.9293	54.3033	19.4159	29.188
ENSMODT00000002599.3	ENSMODG00000002089	RBFOX3	7.42818	5.95641	0.422463	0.649024	1.42757	0.806555	6.52348	0.549628	2.64178	5.31493	12.9119	10.2333
ENSMODT00000002602.4	ENSMODG00000002093		0.236254	0.258918	0.108417	0.100279	0	0.121249	0.128056	0.348573	0.132193	0.167477	0.294914	0.278668
ENSMODT00000002603.4	ENSMODG00000002094	FASTKD3	4.83095	7.23675	3.14278	1.98118	1.50915	2.66283	3.12027	5.82716	9.26656	5.95013	14.6775	12.3064
ENSMODT00000002604.2	ENSMODG00000017696		8.52189	4.72241	13.8053	7.49014	0	18.7351	11.3883	0	0	0	0	0
ENSMODT00000002605.3	ENSMODG00000002096		6.11564	10.1545	3.72041	2.39085	0	2.6561	3.76744	4.84002	4.71841	5.82268	15.0881	13.7483
ENSMODT00000002606.3	ENSMODG00000002096		12.2097	19.1096	7.27483	8.98011	1.8077	7.17408	8.9069	10.2297	13.7436	13.7058	33.9212	29.4372
ENSMODT00000002607.2	ENSMODG00000002097	IL10	0.0265921	0	0	0	6.17572	64.7398	6.13966	72.1801	74.2221	153.827	0.156153	0
ENSMODT00000002613.4	ENSMODG00000002101	CYP19A1	0.0207512	0.0620827	0	0	0.432922	1.63045	0.054497	3.16354	2.23009	3.41258	54.746	19.9362
ENSMODT00000002614.3	ENSMODG00000002105	FANCL	0	0.415352	0.218749	0.278993	0	0.204656	0.199518	0	0	0	1.9237	1.5985
ENSMODT00000002615.4	ENSMODG00000002104	SLC41A2	27.5011	30.2124	420.625	151.534	1854.06	77.6824	660.816	366.565	484.32	133.85	25.3997	25.5531
ENSMODT00000002616.4	ENSMODG00000006089		4.31162	5.71888	8.1175	0.149913	6.2543	1.49431	1.25162	5.25486	9.08106	5.13025	9.006	14.0773
ENSMODT00000002617.3	ENSMODG00000002109	TNFAIP8L3	6.54138	6.89317	4.81553	4.93458	0	2.37582	3.77813	3.0283	2.27666	0.748064	24.6519	15.6303
ENSMODT00000002618.4	ENSMODG00000002106	POMGNT1	45.2215	47.4165	58.3073	49.8871	47.5144	36.982	34.4765	37.326	49.8533	46.7752	47.7571	52.0524
ENSMODT00000002619.4	ENSMODG00000002107	CERT1	4.45308	4.77951	8.31136	0.792993	3.8113	3.71704	1.59988	1.01479	1.12082	2.05077	1.69734	2.33359
ENSMODT00000002622.3	ENSMODG00000002110	MTRR	6.88143	7.0577	8.20573	0.738841	6.14174	4.32937	2.61534	11.3031	19.1627	14.1876	20.8968	21.1532
ENSMODT00000002623.4	ENSMODG00000002113	TSPAN1	239.535	148.208	247.73	282.966	63.4346	32.9041	111.854	25.5406	46.3457	46.0284	126.832	196.495
ENSMODT00000002626.3	ENSMODG00000002115	IL20	0	0.0244774	0	0	0.60397	0.144441	0.473051	0.407334	1.00592	2.71952	0	0.0765452
ENSMODT00000002630.3	ENSMODG00000002114	BCL11A	0	0.00160805	0.396732	0	0	0.186614	0.318938	0.90523	0.264393	0	0	0.505591
ENSMODT00000002631.3	ENSMODG00000002117	CHST11	3.24655	3.21239	0.333324	0.146819	1.42984	1.65289	0.307035	1.59904	2.08658	1.27228	4.22212	2.89993
ENSMODT00000002632.3	ENSMODG00000002119	FSTL5	0	0	0	0	0	0	0	0	0	0	0	0
ENSMODT00000002634.4	ENSMODG00000002120		0.869691	0.893435	0.0547119	0.130636	0.548923	0.516194	0.195096	0.605599	1.08203	0.331861	0.924481	1.29238
ENSMODT00000002636.4	ENSMODG00000002124		0.0742763	0.0191006	0.0208777	0	0	0	0	0.0663429	0	0	0.172954	0.386087
ENSMODT00000002637.4	ENSMODG00000002122	CELSR2	27.675	33.0483	12.516	3.83973	4.93209	9.70471	4.26874	12.336	14.4459	14.9626	11.9346	33.7437
ENSMODT00000002639.4	ENSMODG00000002127	ENPP7	0	0	0	0	0	0	0	0.0861871	0	0	0	0
ENSMODT00000002644.4	ENSMODG00000002130	AP4E1	4.37428	5.79184	3.53673	0	0	1.97473	1.3994	7.14278	15.1136	7.89462	17.2633	11.467
ENSMODT00000002647.4	ENSMODG00000002133		16.0873	15.8354	13.2993	18.8766	12.589	12.6029	14.1136	10.4825	13.1995	13.1183	5.8901	10.0856
ENSMODT00000002650.3	ENSMODG00000024673		1.28357	0	0	0	0	0.538702	0.289103	2.98649	2.35461	3.38568	1.37046	2.95093
ENSMODT00000002651.4	ENSMODG00000002137	CBX2	16.4944	18.8422	0.936113	0.254579	2.93012	0.694297	0.949288	3.24253	7.1981	3.6905	21.6132	34.2406
ENSMODT00000002652.4	ENSMODG00000002138	SEMA5A	5.44009	9.34874	2.47267	0.208951	1.28798	3.67553	0.631352	4.65228	4.06904	5.18557	19.8879	19.4274
ENSMODT00000002654.3	ENSMODG00000002139		2.08232	1.11086	22.7949	10.711	4.77293	1.94891	1.16245	2.77445	2.86654	7.03095	4.34239	4.26959
ENSMODT00000002655.3	ENSMODG00000002140	FKBP1B	23.218	22.1903	37.3978	42.5858	10.7995	20.5222	16.117	10.3079	14.381	21.1428	7.94658	14.7696
ENSMODT00000002656.3	ENSMODG00000002142	CBX4	11.9983	13.8836	24.7097	8.90171	2.27047	4.3846	2.0609	9.58532	14.5191	7.60576	13.4552	14.2718
ENSMODT00000002657.4	ENSMODG00000002141		34.947	3.02227	5.99046	1.0267	117.442	29.0068	102.666	162.216	887.127	534.565	22.6621	9.65021
ENSMODT00000002658.3	ENSMODG00000002144	SF3B6	229.814	254.988	255.398	462.247	314.963	375.689	414.088	110.356	114.747	124.068	66.1759	87.1417
ENSMODT00000002659.4	ENSMODG00000002143	C3	109.248	175.862	7.11573	9.52627	7.18332	57.4011	19.8315	25.2595	63.4843	86.3099	469.762	518.835
ENSMODT00000002660.4	ENSMODG00000002145		0.694813	1.22064	1.46705	0.898574	5.02194	1.83659	0.672637	2.25192	4.45548	4.10718	1.99786	5.13098
ENSMODT00000002662.3	ENSMODG00000002147	TP53I3	4.51469	4.45215	2.26332	2.37254	16.5666	10.427	14.1597	6.19069	3.60912	4.51227	3.12397	4.80878
ENSMODT00000002663.4	ENSMODG00000002148	SPPL2A	25.925	25.2248	12.1254	4.00874	28.2055	20.7324	23.988	35.3937	50.5562	46.5119	48.5304	41.2505
ENSMODT00000002667.4	ENSMODG00000002151		49.6154	40.4691	36.7586	33.2935	47.1234	34.6245	40.0154	41.6008	44.3361	43.1859	29.4271	35.492
ENSMODT00000002668.4	ENSMODG00000025443		0.820372	0	1.87585	0.188822	0.768439	0.485988	0.31741	0.885758	0	0	0	0.000139398
ENSMODT00000002671.4	ENSMODG00000002155	NPY1R	0.0407835	0.159365	0	0	0	0	0	0.591825	0.298566	0.0626965	0.340492	0.88867
ENSMODT00000002672.4	ENSMODG00000002154	SARS1	23.6753	26.2358	72.9902	59.9664	51.3881	37.9492	38.9184	40.1628	45.3961	31.8621	52.3898	31.343
ENSMODT00000002677.3	ENSMODG00000002159	YOD1	4.28492	4.87401	10.1834	1.03108	11.1004	4.69411	2.37312	17.6	20.784	22.7182	9.96852	8.87203
ENSMODT00000002678.5	ENSMODG00000002158	TOMM70	40.0002	48.1255	42.5307	16.3692	18.5248	25.7867	17.6608	42.9371	51.3106	42.2641	68.8305	59.1712
ENSMODT00000002680.3	ENSMODG00000002161	TBC1D16	4.72324	6.18463	5.79624	1.00003	1.79831	2.07772	0.246694	4.75438	4.23253	4.03312	11.1614	11.991
ENSMODT00000002682.3	ENSMODG00000002162	NFYB	111.048	126.219	66.6331	58.7172	76.736	60.5661	58.0019	87.3704	98.4488	96.1388	118.388	140.673
ENSMODT00000002683.3	ENSMODG00000002160	PAPOLG	8.90269	9.71016	8.22607	3.10485	6.8486	3.65557	3.34315	12.3808	25.6916	14.9296	31.9042	29.1517
ENSMODT00000002684.5	ENSMODG00000002163	TBC1D31	6.27457	6.97965	4.03689	2.55004	0.18786	2.36378	2.50249	7.3758	7.98453	6.42624	18.5629	25.6132
ENSMODT00000002685.3	ENSMODG00000002164	TMEM170A	20.5797	13.856	10.3024	8.27563	3.88789	6.48759	6.93244	6.85904	7.32322	8.81819	17.0884	13.116
ENSMODT00000002687.3	ENSMODG00000002165		2.38616	3.31948	0.427009	0	0	0.352968	0	0.283857	0.322222	0.33787	12.512	13.8882
ENSMODT00000002688.3	ENSMODG00000041078		1569.87	1536.52	823.453	553.156	620.982	225.359	513.887	1340.17	1077.26	1504.42	1894.9	2555.62
ENSMODT00000002691.3	ENSMODG00000002167	LGMN	100.716	106.036	73.2416	42.4407	1066.15	103.071	277.475	311.556	701.694	438.35	195.904	185.396
ENSMODT00000002693.3	ENSMODG00000002168		38.4039	29.6117	10.3667	3.83444	6.54199	1.04491	3.58506	7.62038	11.6515	6.11445	105.808	146.823
ENSMODT00000002695.3	ENSMODG00000002170	TMA16	1.77897	2.42506	1.72845	0	0.795243	0.502842	0.315982	1.79525	1.54818	0.63242	4.09042	2.42807
ENSMODT00000002696.4	ENSMODG00000002171	NIT2	26.1184	20.7828	13.1574	14.3895	38.3825	30.9783	72.7008	46.0461	58.9486	50.9825	20.7208	25.0733
ENSMODT00000002697.3	ENSMODG00000002173		0.180324	0.167655	0	0	0	0.0353521	0.0918721	0	0	0.164348	0.153454	0.226639
ENSMODT00000002698.3	ENSMODG00000002172	REL	3.52717	2.39917	3.54866	0.684421	25.7331	4.13927	4.46421	11.3116	22.8949	4.62504	3.97575	6.241
ENSMODT00000002701.4	ENSMODG00000002175	GOLGA5	37.3421	41.0399	76.5684	48.8563	62.094	36.2164	47.3024	75.5555	81.9013	63.9249	66.1771	70.3309
ENSMODT00000002702.3	ENSMODG00000002176		82.1278	78.2151	129.095	108.951	156.065	50.8339	106.302	77.9869	64.957	51.0589	38.5378	41.0555
ENSMODT00000002703.4	ENSMODG00000002178	HCFC2	5.87289	5.71768	3.87498	0.677434	3.67494	3.79634	2.83479	9.80666	17.6478	9.7396	19.7009	19.757
ENSMODT00000002704.4	ENSMODG00000002179	DERL1	134.106	140.561	242.34	126.262	220.458	94.354	123.643	136.012	188.729	155.984	141.042	121.24
ENSMODT00000002707.3	ENSMODG00000002180		39.4928	39.9643	6.46423	3.94396	6.84397	22.4552	4.12245	23.0387	23.6146	34.4327	41.4615	68.4071
ENSMODT00000002708.4	ENSMODG00000002181	GAA	5.60739	9.73277	12.451	3.34619	7.27707	3.42765	4.05381	7.57241	11.9312	12.5689	21.5174	19.5836
ENSMODT00000002709.3	ENSMODG00000002184	ZHX2	18.221	18.774	6.90038	3.99674	3.5028	2.78482	2.33852	3.23249	5.77626	3.27169	13.0767	14.4869
ENSMODT00000002710.4	ENSMODG00000002182	ELAPOR1	204.399	261.465	1063.9	101.85	30.5919	2.56594	6.3124	29.2692	71.1254	28.7022	333.144	198.26
ENSMODT00000002711.3	ENSMODG00000002183	ANXA1	608.604	577.562	133.8	176.535	147.118	708.153	351.778	822.372	785.533	2065.21	628.477	781.564
ENSMODT00000002715.3	ENSMODG00000002186		127.925	118.302	104.967	98.1191	291.762	294.141	351.125	254.356	196.664	250.999	78.9669	95.9635
ENSMODT00000002717.3	ENSMODG00000002190		168.01	192.08	134.453	131.132	74.7568	95.1391	79.9644	130.666	201.553	170.956	262.026	246.352
ENSMODT00000002718.3	ENSMODG00000002191	PFKFB2	14.4781	14.5987	10.8834	0.9356	5.44203	4.13895	1.30598	13.3584	41.0204	13.0054	19.3184	14.5479
ENSMODT00000002722.4	ENSMODG00000002194	GLT8D2	40.0475	32.8466	7.40638	9.3015	5.86897	8.74771	4.54387	8.19887	7.70884	10.0089	59.1672	36.1168
ENSMODT00000002723.4	ENSMODG00000002193	MAPK8	14.257	14.7912	12.4783	5.06411	9.15637	6.43411	7.35278	11.8578	14.4342	10.3622	16.3966	18.5437
ENSMODT00000002729.3	ENSMODG00000002200		0	0	0	0	0	0	0	0	0	0	0	0
ENSMODT00000002730.4	ENSMODG00000002196	TRPM7	19.2495	23.3846	18.4298	3.97269	11.2775	19.4403	9.19689	54.8023	46.3293	43.1936	69.2886	74.9947
ENSMODT00000002731.3	ENSMODG00000002197		20.4532	10.7458	1.91338	2.06046	1.22048	0.554762	1.88529	2.39075	4.22154	1.72092	17.528	29.6868
ENSMODT00000002734.3	ENSMODG00000002203	ADAT1	1.02836	0.635303	0	0	0	0.0905297	0	0	1.39018	0.338181	0.955684	1.42184
ENSMODT00000002735.3	ENSMODG00000002202	PUS10	9.81415	10.7949	10.5352	5.35514	31.7078	3.99581	7.72036	10.8783	13.4594	10.0413	15.5205	16.85
ENSMODT00000002738.2	ENSMODG00000002205	TAF13	22.2258	37.3731	43.7401	58.0617	74.0537	50.6419	47.072	74.6353	52.6658	70.2411	34.3235	48.3264
ENSMODT00000002739.5	ENSMODG00000002207	USP50	3.82783	2.48645	3.6165	3.32844	1.73582	5.75279	9.56728	9.9572	12.6037	8.95819	2.91919	2.12864
ENSMODT00000002740.4	ENSMODG00000002206	TDG	4.80643	5.08221	33.0346	18.2512	8.96994	10.1201	5.99837	17.0765	22.8479	14.1645	18.8912	16.9011
ENSMODT00000002741.4	ENSMODG00000002209	ITPK1	12.6599	13.4732	13.594	2.68826	6.23011	4.34902	4.98929	10.9272	10.6464	10.3828	19.3558	22.4747
ENSMODT00000002744.3	ENSMODG00000002208	IPP	51.9345	57.5601	59.7646	29.1002	72.289	34.5259	34.9199	52.0713	44.2121	48.5741	66.4566	56.9783
ENSMODT00000002745.3	ENSMODG00000002210	TMEM251	35.696	39.7731	55.0856	54.4739	21.2906	30.6849	30.7561	39.8401	73.6812	44.6039	38.9083	46.3176
ENSMODT00000002748.3	ENSMODG00000002211		1.75403	0.899308	0.129281	0.13294	0	0.123584	0	0	0.30418	0.171169	0.690263	1.20399
ENSMODT00000002749.4	ENSMODG00000002213	CARD14	0.0254221	0.0374051	0	0	0.067154	0.0388512	0.0162924	0.0459847	0.0522201	0.0441213	0.0592302	0.0887082
ENSMODT00000002751.3	ENSMODG00000024214		6.23871	4.69605	2.49508	1.24421	1.97816	2.6675	3.05498	2.67792	4.27484	6.44587	12.0509	10.9008
ENSMODT00000002752.3	ENSMODG00000002215		240.718	243.565	109.17	98.4235	70.5501	91.7954	85.3201	92.9033	135.63	116.528	262.656	219.49
ENSMODT00000002756.3	ENSMODG00000002217	PEX13	25.9229	27.8032	31.4708	5.77508	30.1337	15.5286	9.11455	36.6741	41.4189	39.5773	43.39	52.6054
ENSMODT00000002757.4	ENSMODG00000002218	TBC1D23	8.95089	9.19377	2.84989	3.02105	2.75857	2.58755	3.48055	2.32912	6.37206	8.53289	25.082	31.8213
ENSMODT00000002760.4	ENSMODG00000002220	USP8	41.3018	46.8184	45.7493	16.6741	40.9977	32.3171	33.8482	74.2967	83.2625	70.8045	84.2087	69.4652
ENSMODT00000002761.4	ENSMODG00000002221	CLCC1	16.1855	15.3755	7.44763	2.90032	12.8502	7.04086	7.17711	16.8706	27.2123	17.5482	32.7653	48.8407
ENSMODT00000002762.3	ENSMODG00000002222	SGSH	26.9848	21.7329	9.3777	5.97098	3.61711	15.6587	5.38682	28.7408	45.2557	78.5048	29.3863	30.2658
ENSMODT00000002763.4	ENSMODG00000002223		48.0082	70.2	43.792	14.5838	51.2233	30.9209	33.7874	63.8538	69.6759	56.8934	102.241	89.3277
ENSMODT00000002764.3	ENSMODG00000002224		0	0	0	0	0	0	0	0	0	0	0	0
ENSMODT00000002766.3	ENSMODG00000002226		0.0365868	0.0113325	0.0127653	0	0	0	0.0152563	0	0.102506	0.0209009	0.0382215	0.0426481
ENSMODT00000002773.4	ENSMODG00000002230		0	0.104832	0	0	0.106502	0	0.0480629	0.491327	0	0	0.921985	1.5833
ENSMODT00000002776.4	ENSMODG00000002234	HSP90B1	362.161	349.871	2120.37	1233.88	252.768	238.614	475.583	547.531	478.742	448.88	669.289	710.856
ENSMODT00000002777.3	ENSMODG00000002237		0.48222	0.909358	1.15414	0.289884	5.03849	0.614748	3.86607	3.77296	6.08083	3.79168	0.566965	1.56798
ENSMODT00000002778.5	ENSMODG00000002236		0.121057	0.0226009	0.0126768	0	0	0.047612	0.0305117	0	0.0507073	0.0623165	0.0189655	0.0424367
ENSMODT00000002781.3	ENSMODG00000002238		4.04744	8.02363	5.23113	0.165294	4.58355	1.66708	0.832529	3.33327	7.78301	7.90457	14.3051	15.7363
ENSMODT00000002784.4	ENSMODG00000002239	GPBP1L1	28.0386	29.6543	19.1558	13.3555	17.8992	8.78573	14.3964	12.9393	11.3553	15.4538	14.2269	26.4568
ENSMODT00000002786.4	ENSMODG00000002243	BTBD7	16.6763	17.8118	19.1825	16.5667	6.45804	9.16977	6.05476	12.7947	16.2788	19.5375	14.849	19.0456
ENSMODT00000002788.4	ENSMODG00000002241		10.1191	16.3448	1.96456	0.677348	0.440044	1.91562	0.591941	4.36968	7.42669	9.09185	26.1726	39.5254
ENSMODT00000002789.4	ENSMODG00000002244		0.611968	0.675153	0.917109	0.383401	0.193653	0.0806864	0.0759245	0.140848	0.718385	0.372063	1.1395	1.87156
ENSMODT00000002791.3	ENSMODG00000002245		0.117895	0.0565135	0.563673	0.0899186	0.144095	0	0	0	0	0	0	0.191891
ENSMODT00000002792.3	ENSMODG00000002246	CLDN2	0.074752	0.14153	0	0.0700256	0	0	0	0.207744	0.237226	0.294664	0	0.798165
ENSMODT00000002795.3	ENSMODG00000002248		18.5589	16.9458	10.3642	2.74857	11.6277	24.1945	28.226	39.9777	35.0083	32.0544	31.8261	36.9105
ENSMODT00000002796.4	ENSMODG00000002249		11.62	9.3026	2.15563	3.15192	13.3449	1.17156	0.879268	1.65711	3.37007	1.86243	20.9272	31.9672
ENSMODT00000002798.5	ENSMODG00000002250	MAP4K4	3.49656	2.9699	1.11101	0.227514	1.22331	1.53001	0	3.07809	0.221469	3.05122	9.19638	6.84148
ENSMODT00000002800.2	ENSMODG00000002252	KIAA1841	10.2217	8.60663	13.9833	3.35228	10.9649	8.40294	6.20697	18.3871	21.1089	19.0436	29.7396	36.0937
ENSMODT00000002802.3	ENSMODG00000002253	GABPB1	20.5707	25.9612	15.5003	11.9627	9.04849	9.62669	8.16485	15.1875	18.587	15.2749	21.6221	24.8367
ENSMODT00000002804.4	ENSMODG00000002254	SLC26A11	0.144707	0	0	0	5.38089e-07	0	0	0	0.268638	0	0.594643	0
ENSMODT00000002810.3	ENSMODG00000002258	TMEM192	8.30002	8.8134	13.7513	5.82679	10.4432	8.40273	7.37581	17.4729	16.7219	14.8068	13.79	14.5121
ENSMODT00000002812.3	ENSMODG00000002257		9.63483	4.86932	1.40759	0.539031	0.345265	0.311934	0.565873	0.568168	2.17143	0.713551	5.35777	13.8452
ENSMODT00000002818.5	ENSMODG00000002259	TRIP10	23.8991	17.9885	20.2307	16.101	21.1356	21.578	35.1861	48.0309	50.7304	30.5481	15.8563	18.3149
ENSMODT00000002820.4	ENSMODG00000002216	ARHGAP22	1.77974	1.78619	0.207467	0	0.499766	0.555887	0.328831	0	0.237925	0	4.38777	6.60806
ENSMODT00000002821.3	ENSMODG00000002265	TAT	0	0.0215391	0.187913	0	19.8546	231.465	90.2028	475.363	213.132	269.873	0.133426	0.037451
ENSMODT00000002822.3	ENSMODG00000002266		39.515	44.2751	80.1169	52.6591	60.2182	132.962	88.8007	162.62	174.623	172.139	68.7257	68.5224
ENSMODT00000002825.4	ENSMODG00000002268	GPSM2	9.06904	13.2678	23.6411	15.2951	5.9994	6.10343	9.12264	13.4231	18.1359	10.7015	18.3483	22.5506
ENSMODT00000002826.4	ENSMODG00000002269	DNASE1L3	4.9974	2.87295	3.0054	0.832891	6.81803	2.63405	2.94182	4.17548	2.63865	2.77823	5.81376	4.39508
ENSMODT00000002830.4	ENSMODG00000002274	SNTB1	24.8501	35.2377	135.874	21.9714	234.943	12.6328	57.1566	28.2145	37.1823	61.3484	20.1508	24.3879
ENSMODT00000002833.4	ENSMODG00000002275	CMSS1	12.4862	16.2977	4.14809	4.76732	3.35251	61.6628	84.1688	28.7744	15.4434	27.3303	13.8077	13.0981
ENSMODT00000002837.4	ENSMODG00000002278		39.8685	42.9902	27.2489	17.8714	36.6263	16.0527	17.3734	25.2534	38.7365	28.0351	89.0461	96.7457
ENSMODT00000002839.3	ENSMODG00000002281	MARVELD3	7.92451	6.1948	14.1461	13.1995	33.5913	35.3513	41.684	42.6108	29.9798	33.6494	6.52737	10.1493
ENSMODT00000002841.4	ENSMODG00000002282		116.55	84.4375	9.47038	5.95452	2.10374	0.840616	1.73485	7.22616	6.59597	1.31267	206.24	122.284
ENSMODT00000002842.4	ENSMODG00000002284	HDC	0	0	0	0.134563	0	0	0	0	0	0	0.150994	0
ENSMODT00000002844.4	ENSMODG00000002287	FILIP1L	51.6787	44.6896	5.95484	7.04066	8.99145	22.9459	17.0825	32.613	35.7437	30.2501	120.73	105.484
ENSMODT00000002845.3	ENSMODG00000002283	NT5DC3	6.68058	10.305	28.5609	10.4372	28.0554	1.95654	7.2509	8.41821	5.52461	3.86479	14.7426	10.871
ENSMODT00000002846.4	ENSMODG00000002286		0	0	0.0518654	0	0	0.0321209	0.040022	0.159249	0	0.102541	0	0.051443
ENSMODT00000002848.3	ENSMODG00000002285		6.99419	3.25527	1.42073	1.25231	0.325207	0.384099	0.594819	0.902462	1.62436	0.463988	6.93597	19.961
ENSMODT00000002849.4	ENSMODG00000002288		70.5853	97.7019	110.911	142.319	102.231	31.0353	33.7863	49.9462	58.261	50.1673	131.954	101.54
ENSMODT00000002851.4	ENSMODG00000002290	MTBP	2.77398	4.58842	1.30617	0.847403	1.07786	1.43695	1.68936	2.51442	3.94638	1.99167	10.0063	14.0995
ENSMODT00000002854.4	ENSMODG00000002293		3.85558	3.54068	8.22056	9.23883	64.3997	272.558	160.294	371.708	546.12	419.305	12.0226	17.0867
ENSMODT00000002856.4	ENSMODG00000002296	ASB2	4.55071	2.70878	1.2846	0.302327	0	0.86659	0.0642226	1.67872	1.3248	0.407914	15.1535	6.97726
ENSMODT00000002857.4	ENSMODG00000002297	HECW1	0.166462	0.176485	0	0	0	0	0	0	0	0	0.113083	0
ENSMODT00000002860.3	ENSMODG00000002299	PHLPP2	0.178177	0.0580657	0.0746787	0.000420267	2.02648	0.049125	0.04206	0.0378845	3.86263	3.35494	5.24703	5.0984
ENSMODT00000002862.3	ENSMODG00000002302	ALG3	21.236	22.48	34.0588	24.3489	54.0931	19.901	27.9501	14.6352	20.9141	19.4381	17.1917	12.1863
ENSMODT00000002867.4	ENSMODG00000002305	WDFY4	1.05362	0.825208	0.133476	0.0168983	0.0981703	0.0901936	0.142954	0.114709	0.179095	0.489262	2.90008	1.58693
ENSMODT00000002869.3	ENSMODG00000002310	MRPL32	172.377	152.529	91.7909	142.754	57.9946	75.9212	97.842	34.1226	41.3239	37.686	20.1007	37.7743
ENSMODT00000002870.4	ENSMODG00000002308		0	0	0	0	0	0	0	0.145958	0	0	0.0941472	0.141274
ENSMODT00000002871.5	ENSMODG00000002309	ARPP21	0	0	0	0	0	0	0	0	0	0	0	0
ENSMODT00000002872.4	ENSMODG00000002311	STXBP3	0	0.420492	0	0	0	0	0	0	0	0	0	0
ENSMODT00000002877.4	ENSMODG00000002315	LRRC18	12.6988	7.8157	1.05194	1.2611	0.793447	0.691689	0.798314	1.83232	2.30291	1.40335	17.2216	35.8173
ENSMODT00000002882.3	ENSMODG00000002320	SLC27A2	7.75032	6.88121	0.266022	0.492279	10.5504	24.6441	8.66725	21.2899	9.12739	15.587	7.40741	7.48677
ENSMODT00000002885.3	ENSMODG00000002322		0	0.0265651	0	0	0	0	0	0	0.0521628	0	0.0393363	0
ENSMODT00000002889.4	ENSMODG00000002325	VSTM4	2.72712	4.1972	0.470332	0.170815	0	0.983211	0.468442	1.17619	1.26935	1.37401	4.56831	4.17726
ENSMODT00000002890.4	ENSMODG00000002324	FNDC7	2.46196	1.79078	2.16826	4.03749	0.227008	6.74572	7.42466	7.09527	4.91622	3.77442	7.27944	8.63726
ENSMODT00000002892.3	ENSMODG00000002327		6.99356	10.0255	0.507055	0	2.73991	4.42755	1.33416	1.91164	1.95862	1.39472	3.32334	4.15408
ENSMODT00000002896.5	ENSMODG00000002329	ZNF777	14.7334	14.3781	14.0465	10.945	11.2238	10.0368	7.11407	12.3945	15.2853	13.2783	10.0988	14.9707
ENSMODT00000002901.4	ENSMODG00000002337		7.95859	7.41411	6.21709	6.48234	5.04355	2.95702	4.05117	0.326854	0	0	0	0
ENSMODT00000002903.4	ENSMODG00000002335		0.0513221	0	0.0189648	0	0	0.10714	0.0224612	0.379666	0.250996	1.61732	0.14958	1.23789
ENSMODT00000002904.4	ENSMODG00000002333	ABHD6	0	0	0	0	0	0.246774	0.31306	0	0	0	0	0
ENSMODT00000002905.4	ENSMODG00000002334	KLHL2	4.4873	4.45417	7.33013	7.25667	7.18189	8.0824	8.2305	9.68729	10.0597	9.1371	10.5586	18.7128
ENSMODT00000002908.4	ENSMODG00000002339	ZNF746	0	0	0.180609	0.11608	0	0	0	0	0	0	0	0.754082
ENSMODT00000002909.4	ENSMODG00000002341	ATPSCKMT	3.00079	1.42546	0	0	0	0.717258	0	0	0	0	0	0
ENSMODT00000002911.3	ENSMODG00000002342	DRGX	0.0522555	0	0	0	0	0	0	0	0	0	0.268773	0.528966
ENSMODT00000002912.3	ENSMODG00000002343		0	0	0	0	0	0	0	0	0	0	0	0
ENSMODT00000002913.2	ENSMODG00000002344	RPP14	23.6961	29.0641	20.491	13.9802	16.9238	13.6398	15.9701	15.9585	16.8026	16.17	16.5052	13.2277
ENSMODT00000002914.4	ENSMODG00000002345	TBC1D8B	5.65012	6.63692	26.5322	2.67612	17.0412	7.44228	5.67929	15.6579	18.5251	17.9336	12.4755	13.597
ENSMODT00000002918.4	ENSMODG00000002349	MSMO1	18.9785	18.4009	27.25	17.4931	23.0206	27.0533	18.0175	1.73727	3.92525	4.88985	3.93719	2.26105
ENSMODT00000002919.3	ENSMODG00000002350		26.4713	29.984	51.0474	31.486	19.5264	22.7673	20.0103	51.6015	70.7716	48.168	89.5237	104.909
ENSMODT00000002920.4	ENSMODG00000002351		0.408355	0.122787	1.47057	0	0.249638	1.01738	0.318143	1.26467	1.2435	0.407188	0.731522	1.10637
ENSMODT00000002925.2	ENSMODG00000002355	AKR1A1	63.462	65.7804	79.6845	84.9984	177.825	62.139	79.1771	54.5658	60.0839	77.8251	51.1451	47.051
ENSMODT00000002926.4	ENSMODG00000002356	CCT5	134.958	159.818	132.343	89.4119	87.2617	127.19	107.754	260.62	272.735	293.327	367.885	377.798
ENSMODT00000002930.4	ENSMODG00000002357	RNF213	2.81308	2.44056	1.25813	0.125917	0.324486	0.842962	0.577634	2.35587	2.04243	6.30489	10.7315	5.29956
ENSMODT00000002931.4	ENSMODG00000002361		3.0428	0.978679	0.851694	2.52154	1.82879	0.705532	0.000535553	0	3.66659	4.70557	4.64374	4.34097
ENSMODT00000002932.4	ENSMODG00000002360	DCBLD2	8.57293	9.61065	1.47884	0.519684	0.554751	2.90202	1.58046	8.74922	8.55942	9.56698	23.4125	24.5479
ENSMODT00000002933.4	ENSMODG00000002362	RNF128	13.9297	13.7147	37.4705	24.7197	87.6293	23.611	31.1915	36.7315	36.3527	37.8455	12.5157	12.1772
ENSMODT00000002934.4	ENSMODG00000002363	ASB1	30.3991	32.4994	21.0063	5.54003	20.0793	13.474	9.33939	12.0505	14.0082	18.4174	16.5595	20.7772
ENSMODT00000002935.4	ENSMODG00000002364		0.22445	0.0186625	0.102762	0.0208433	0	0	0	0	0	0	0.169415	0.348615
ENSMODT00000002936.4	ENSMODG00000002366		0	0	0	0.397157	0	0	0	2.2097e-08	0	0.0108427	0	0
ENSMODT00000002937.4	ENSMODG00000002365	ATP8B4	0	0	0	0	0.196611	0	0	0	0	0	3.37643e-10	3.00507e-09
ENSMODT00000002938.4	ENSMODG00000002367	PPP4R4	4.36967	4.23302	1.81571	3.72893	67.792	3.63977	42.3591	19.3335	16.5701	3.80344	4.65443	6.52263
ENSMODT00000002939.3	ENSMODG00000002368		0.879174	1.00035	0.0364027	0.0406062	0	0.0341475	0.0213456	0	0.329339	0.280889	3.08886	2.81728
ENSMODT00000002942.3	ENSMODG00000002371	CMBL	13.805	10.0062	4.71538	6.23224	1.8205	8.75078	3.20847	6.75327	10.4025	28.5847	12.686	18.9933
ENSMODT00000002943.4	ENSMODG00000002372	ENDOV	0.890042	0	0	0	1.20365	0	0	1.27033	0	0	0.32422	0
ENSMODT00000002944.3	ENSMODG00000002369		0	0	0	0	0	0	0	0	0	0	0	0
ENSMODT00000002946.3	ENSMODG00000002373	CPE	71.8192	58.6976	15.142	13.8256	12.499	45.7342	12.7567	39.0708	48.7768	59.4941	128.233	125.736
ENSMODT00000002948.3	ENSMODG00000002376		497.899	748.752	148.601	100.048	55.9887	90.4137	66.0454	97.5633	111.947	110.663	740.678	717.688
ENSMODT00000002949.3	ENSMODG00000002374	ST3GAL6	5.63901	7.17654	2.57388	4.07746	2.3142	23.8921	2.83387	42.3596	27.4648	28.1151	22.7949	26.8725
ENSMODT00000002950.3	ENSMODG00000002375		0	0	0	0	0	0	0.0711544	0	0	0	0	0.103514
ENSMODT00000002951.4	ENSMODG00000002377	FAM102B	24.8734	26.4172	16.6925	1.31337	30.099	15.6735	6.75772	27.0109	30.269	31.9485	35.3249	48.583
ENSMODT00000002952.4	ENSMODG00000002379	SERPINA10	0.240214	0.505372	0.0593687	0.0884918	14.4683	4.22372	21.1386	26.7419	31.2627	6.82869	0.580312	1.03618
ENSMODT00000002953.4	ENSMODG00000002378	PXK	10.0146	10.1732	4.38766	2.57504	13.9632	11.7002	10.3542	16.3907	12.877	13.9157	11.089	10.0017
ENSMODT00000002955.4	ENSMODG00000002380	PAH	0.0530763	0.0187388	0.146345	0.110059	0	0.0488799	1.18284e-06	0	0	0	0.144475	0.129254
ENSMODT00000002958.3	ENSMODG00000002383	CAMK2N2	1.81224	0	0.998608	0	4.69635	0.932404	0	0	0.664485	0	0	1.66219
ENSMODT00000002959.3	ENSMODG00000002382		541.73	535.504	2098.27	1932.24	1285.23	496.906	895.481	481.408	827.059	963.055	618.448	636.797
ENSMODT00000002961.4	ENSMODG00000002385		1.07034	1.01921	0.279527	0.0848982	0	0.167616	0.0469113	0.158035	0.64434	0.454685	3.08266	2.22836
ENSMODT00000002963.4	ENSMODG00000002386		0	0	0	0	0	0	0	0	0	0	0	0
ENSMODT00000002964.3	ENSMODG00000028671		0	0.103409	0	0	0	0	0	0	0	0	0	0
ENSMODT00000002966.4	ENSMODG00000002387		0	0	0	0	0	0	0	0.06413	0	0	0	0
ENSMODT00000002967.3	ENSMODG00000002405		0.137451	0.129945	0.0702759	0.188657	0	0.0669838	0.213893	0	0	0	0	0.111923
ENSMODT00000002968.3	ENSMODG00000002391	MMACHC	0	0	0.073129	0	0	0	0	0.187048	0.341127	0.369268	0	0.265877
ENSMODT00000002972.3	ENSMODG00000002394	DTWD1	27.848	35.9219	19.651	13.5072	3.37417	12.8911	8.69317	22.0456	24.2825	24.4443	35.2126	43.5818
ENSMODT00000002974.3	ENSMODG00000002395		0	0	0	0	0	0	0.0474637	0	0	0.118272	0.107305	0.120122
ENSMODT00000002975.3	ENSMODG00000002397		0	0	0.17505	0	0	0	0	0	0	0	0.433651	0.706197
ENSMODT00000002977.4	ENSMODG00000002398	PDHB	19.6422	20.7355	27.4395	20.2163	24.3824	21.4834	34.496	25.2123	25.6017	25.9435	26.6906	22.1804
ENSMODT00000002978.4	ENSMODG00000002399		0.122405	0	0.0416082	0	0.497094	0.244007	0	0	0.159068	0	0	0.080573
ENSMODT00000002981.3	ENSMODG00000002401		0.298707	0.137825	0	0	0	0.258927	0.107673	0	0.356269	0.347269	1.00852	0.434712
ENSMODT00000002992.3	ENSMODG00000002407	AP1G1	21.8568	24.6964	62.8235	6.8287	29.2813	14.3555	10.9235	34.6946	35.5282	31.6742	38.5872	39.8288
ENSMODT00000002993.4	ENSMODG00000002411		0.0915077	0.152634	0.0341089	0	6.87937	15.921	5.63929	8.51955	1.40952	1.2924	0.0892597	0.500481
ENSMODT00000002995.4	ENSMODG00000002412	TESK2	15.3963	14.2519	10.5559	8.97784	29.301	7.96551	11.3474	10.2027	10.0642	7.63798	6.60191	12.4784
ENSMODT00000002999.4	ENSMODG00000002416	SLC9A4	9.25625	6.5954	8.20007	4.14709	1.14608	0.878086	0.621088	1.85815	2.79127	2.44383	3.33285	5.80403
ENSMODT00000003001.4	ENSMODG00000002417		1.43151	1.24929	3.57873	0.112389	0.316887	0.181453	0	0.455024	0.441341	0.466499	3.35235	2.24818
ENSMODT00000003003.4	ENSMODG00000002419		24.1884	21.8937	0.430038	1.36645	2.09406	1.67839	2.20342	0.712254	7.32181	0.988284	15.9815	22.8624
ENSMODT00000003004.4	ENSMODG00000002420	PSMD2	116.967	135.21	205.243	157.379	211.938	124.836	157.959	159.568	170.976	159.597	235.045	151.465
ENSMODT00000003006.4	ENSMODG00000002423	GALK2	17.5981	19.2782	43.5912	41.8095	11.8564	25.8997	24.8773	28.3455	34.1461	33.2663	16.7749	23.7407
ENSMODT00000003009.2	ENSMODG00000002426		0	0	0	0	0	0	0	0.184019	0	0	0	0
ENSMODT00000003011.3	ENSMODG00000002425	ZNF821	0.337493	0.653611	0	0	0	0	0.337138	0	0	1.80173	2.63509	0
ENSMODT00000003014.3	ENSMODG00000002429		0.022949	0	0.0249422	0	0	0.0238065	0.0297807	0.119662	0.180542	0.0382612	0	0
ENSMODT00000003015.3	ENSMODG00000002430	TOE1	47.3081	57.896	48.0662	44.1715	39.9902	29.0792	28.0853	40.9925	48.935	39.5499	47.0188	45.8923
ENSMODT00000003017.4	ENSMODG00000002432	ADGRE5	3.92376	1.8513	0.765932	0.205906	2.33315	4.67038	0.638827	2.77731	3.28448	4.24542	1.63505	1.69214
ENSMODT00000003020.4	ENSMODG00000002434	SLC9A2	1.84571	1.80196	3.91232	1.45764	32.8699	19.3765	7.11078	20.8835	26.1944	34.2504	2.49198	4.16728
ENSMODT00000003022.4	ENSMODG00000002435	TLL1	1.57543	1.53723	0.206435	0.0929986	0.0957748	0.542847	0.563058	0.775722	0.700524	0.823415	2.48967	3.12685
ENSMODT00000003023.4	ENSMODG00000002436	RPTOR	4.33955	5.14598	5.0615	0.139764	0.67531	3.23048	1.21143	7.01857	8.51535	11.8217	14.0062	14.4646
ENSMODT00000003025.5	ENSMODG00000002440	MARCHF6	34.6141	34.7565	31.5314	15.9876	66.3861	39.6493	33.7389	73.1155	82.8917	88.4811	54.3821	56.6681
ENSMODT00000003031.4	ENSMODG00000002444	DIAPH2	3.03674	6.38213	0.855685	0	0.16989	1.57485	3.09832	7.6931	6.39304	2.16677	9.67422	8.06439
ENSMODT00000003032.3	ENSMODG00000002446	IST1	36.321	36.2134	53.8556	20.767	76.7647	37.3465	34.6129	81.8703	95.655	91.5699	83.0169	76.2675
ENSMODT00000003033.4	ENSMODG00000002447	TMEM182	0	0	0	0	0	0	0	0.131504	0	0	0	0
ENSMODT00000003034.4	ENSMODG00000002448	DDX39A	30.3199	41.7887	25.3082	22.528	7.69797	31.4137	21.773	42.6854	53.8037	57.5539	83.8621	55.2726
ENSMODT00000003035.3	ENSMODG00000002449	EIF1B	46.894	60.8946	19.0866	13.1839	44.1906	40.0292	25.7615	52.802	60.1113	59.3952	74.4348	101.577
ENSMODT00000003036.3	ENSMODG00000002450		15.3555	19.3031	23.216	4.58544	3.70612	10.0104	9.13632	5.24658	4.85086	4.16117	4.41054	5.44034
ENSMODT00000003038.3	ENSMODG00000002453		0	0	0	0	0	0	0	0	0	0	0	0
ENSMODT00000003040.4	ENSMODG00000002439		13.7017	14.1343	15.6402	1.07991	30.7616	17.9544	7.1257	34.0414	40.8646	36.7644	19.1477	24.6392
ENSMODT00000003041.3	ENSMODG00000002454	ROPN1L	26.5667	16.3072	3.84287	4.76319	2.19644	4.01502	3.78862	5.08138	4.67809	4.39317	24.1214	38.6327
ENSMODT00000003045.4	ENSMODG00000002455	CAMK1G	1.25242	1.28441	0.85318	0.934677	0.542298	0.950892	0.804076	3.99011	8.04727	8.47495	6.30283	5.51132
ENSMODT00000003047.4	ENSMODG00000002457	ANKRD33B	0.183883	0.332907	0.178539	0	0	0.166205	0.127211	0	1.56366	0.922063	1.37857	1.82733
ENSMODT00000003050.4	ENSMODG00000002459		6.66046	8.55543	2.42398	2.34537	3.50925	1.87366	3.55369	3.60013	5.13307	2.50427	1.81506	5.50067
ENSMODT00000003051.2	ENSMODG00000002461	FAM131A	3.4576	2.04355	0.362493	0.303555	0.184968	3.25022	1.86886	1.67571	1.83836	1.70413	1.43007	3.3454
ENSMODT00000003056.3	ENSMODG00000025335		15.9364	12.0722	23.9357	20.8145	27.9698	45.2932	32.9337	47.5496	42.4855	45.1648	14.1947	21.3718
ENSMODT00000003058.3	ENSMODG00000002465		1.82301	1.56444	1.32834	0.481332	0.539528	0.768576	0.735154	4.29189	6.62742	4.96702	8.02066	7.53037
ENSMODT00000003059.4	ENSMODG00000002467	ILDR2	0.420035	0.324129	0.68332	0	0	0.233819	0	1.19216	1.07321	0	0.052783	0
ENSMODT00000003060.3	ENSMODG00000002466		113.42	110.146	88.3515	78.8232	56.5425	68.9932	56.8222	106.241	110.941	100.621	104.563	163.206
ENSMODT00000003062.3	ENSMODG00000002469	TM2D1	129.815	129.904	107.804	111.286	69.6251	53.6572	70.545	59.3687	76.3623	67.7163	85.3465	96.9273
ENSMODT00000003063.5	ENSMODG00000002470		171.038	209.219	84.2777	56.7933	66.93	59.7465	50.7077	100.437	122.957	97.6677	270.237	195.199
ENSMODT00000003065.2	ENSMODG00000002471		12.4115	16.9509	11.6795	8.25668	4.91946	13.0292	7.84775	11.9321	30.1382	25.9989	16.8515	19.9088
ENSMODT00000003066.4	ENSMODG00000002472		90.3788	91.4933	131.894	79.5091	130.621	93.9036	130.244	75.8526	66.5446	75.1733	44.2239	62.2026
ENSMODT00000003069.4	ENSMODG00000002475	NFIA	9.83642	13.9845	53.2766	3.46736	0	1.74683	0.340149	0	0	0	0	0
ENSMODT00000003072.3	ENSMODG00000002476	NMUR1	0.273866	0.893871	0.632577	0.168954	0	0.0761598	0.099785	0	0	0	0.173386	0.189599
ENSMODT00000003074.3	ENSMODG00000002478		0	0	0	0	0	0	0	12.0741	4.64458	11.4294	16.6614	17.1291
ENSMODT00000003075.3	ENSMODG00000002480	DHODH	8.60906	8.11451	7.82271	3.34376	5.6561	2.55719	3.47572	12.0383	20.8254	11.7356	25.0032	17.603
ENSMODT00000003077.4	ENSMODG00000002479	MRPS9	0	0	0	0	0.14129	0.108482	0	0	1.49033	0	3.04266	3.74769
ENSMODT00000003078.4	ENSMODG00000002482	MAEL	1.02316	1.06375	0.219389	0.665635	0.259426	1.08567	0.833335	0.0306213	0.680246	0.23075	3.99694	5.77819
ENSMODT00000003079.3	ENSMODG00000002481	UROD	51.6146	59.3212	43.8411	47.4	95.1	79.1528	90.5617	55.3618	56.4349	60.9233	28.7753	31.4087
ENSMODT00000003081.4	ENSMODG00000002806		0	0.0412365	0	0	0	0	0	0.118392	0.0670315	0.117638	0	0.168118
ENSMODT00000003082.3	ENSMODG00000002485	LAMB3	30.6996	23.8505	1.10431	1.41541	9.73817	52.36	54.4477	56.5131	78.5277	89.7183	55.651	47.1844
ENSMODT00000003086.4	ENSMODG00000002489	CTNND2	0	0.120789	0.00330178	4.31006e-07	0.220302	5.11271e-07	0.314744	0.225903	1.17469	0.21141	0.222469	0.172931
ENSMODT00000003088.4	ENSMODG00000002491	GPA33	0.289687	0.0947729	0.182831	0.566871	0.128721	0.320612	0.403575	2.30502	1.38283	6.12452	0.972067	0.242721
ENSMODT00000003089.3	ENSMODG00000002494		0	0	0	0.120696	0	3.4242	0.523988	4.71959	22.2705	40.1885	2.57292	2.45053
ENSMODT00000003090.4	ENSMODG00000002495		39.2608	18.8275	5.46047	1.21076	4.54244	0.500091	1.40983	3.03798	4.75922	2.5829	55.8688	80.1729
ENSMODT00000003091.4	ENSMODG00000002493	DDX52	21.4994	24.7135	16.103	8.65264	7.06577	7.43941	5.58671	16.2234	28.5658	23.5207	56.9189	49.8226
ENSMODT00000003095.4	ENSMODG00000002497	TGFBRAP1	6.89994	6.91819	5.56591	1.52562	3.09799	2.17536	1.79082	5.87375	7.45738	4.76422	10.696	9.84428
ENSMODT00000003098.3	ENSMODG00000002499	ANXA10	0.0339826	0.0690337	0	0	0	0.0357731	0.090305	0	0	0	0	0.111019
ENSMODT00000003101.2	ENSMODG00000002503	TXNL4B	101.348	81.9179	53.1024	42.3955	35.677	40.0407	40.2226	58.9212	75.2506	79.7299	127.14	197.272
ENSMODT00000003102.4	ENSMODG00000002506	IGF1	13.8484	13.1837	3201.38	692.351	11.7173	6.56055	7.33007	8.39415	7.7503	6.84526	49.7445	17.3685
ENSMODT00000003104.2	ENSMODG00000002504	EIF2B3	36.8674	38.7428	39.2103	42.9024	20.3197	18.4534	18.9259	27.5972	33.2491	24.5476	51.2568	40.0809
ENSMODT00000003105.4	ENSMODG00000003225		0	0	0.015396	0	0	0.128446	0	0	0	0	1.34944e-09	8.92831e-09
ENSMODT00000003106.3	ENSMODG00000002508		9.40225	11.7472	4.22915	1.67832	2.14124	4.06601	3.62597	7.80816	11.0528	9.03949	16.8286	15.3893
ENSMODT00000003107.4	ENSMODG00000002501	ALDH1A1	0	0	0	0	0	0	0	0	0	0	0	0
ENSMODT00000003108.4	ENSMODG00000002506	IGF1	2.0244	1.4246	534.367	100.223	0	1.68999	0.973498	3.58039	2.70599	1.80194	14.6793	8.53994
ENSMODT00000003111.4	ENSMODG00000002509	ERCC6	1.52534	1.54224	1.89793	0.246042	1.07939	0.754029	0.981832	3.02098	5.43135	1.64741	3.50669	3.74553
ENSMODT00000003112.3	ENSMODG00000008031		0.275972	5.4122e-06	0	3.25369e-07	0	0.170678	0	2.15539	4.83975	0.97869	2.8201	3.69707
ENSMODT00000003118.6	ENSMODG00000002516	SECISBP2L	3.57672	4.76011	10.8021	1.37884	5.11873	2.02661	1.98222	11.7168	14.084	8.50258	19.179	24.6343
ENSMODT00000003119.4	ENSMODG00000002518	NPPC	0	0.0701846	4.81292	1.8937	25.4703	3.42777	4.35534	2.11655	1.64078	2.0264	0	0
ENSMODT00000003120.5	ENSMODG00000002519	DUSP27	0.333907	0.20122	0.0738833	0.00805181	0.202663	0.748902	0.127518	0.346294	0.677517	0.774948	0.426929	0.508603
ENSMODT00000003122.4	ENSMODG00000002520	TRAF3IP3	1.38953	0.954064	0.100703	0.241684	0	0.17115	0.428818	0.239041	0.333143	1.16705	3.63724	2.0623
ENSMODT00000003125.3	ENSMODG00000002522	SLC18A3	1.34162	0.121184	0.0834313	0	0.126967	0.0513577	0	0.0927366	0	0.0849878	0.0397204	0
ENSMODT00000003128.4	ENSMODG00000002512		3.68864	3.28931	0.567524	0.106439	0.370361	0.391582	0.559217	0.527509	0.472052	1.08173	7.82753	2.56646
ENSMODT00000003129.4	ENSMODG00000002521	BAIAP2	1.31026	2.77799	1.43262	1.06361	7.06997	6.05463	7.38018	13.9416	7.05668	8.40056	3.87406	7.60636
ENSMODT00000003132.4	ENSMODG00000002526	PTCH2	7.30388	10.2018	1.72987	1.11695	0	1.83589	0.317232	1.19604	1.42398	2.63166	0.988882	2.20029
ENSMODT00000003134.5	ENSMODG00000002524	PKN1	13.6076	17.4108	7.15234	3.34149	5.82164	7.03019	6.50302	7.39395	8.88879	7.41618	6.81195	11.1245
ENSMODT00000003135.4	ENSMODG00000002527	PMCH	0.267891	0	0.119242	0	59.8967	1.53597	3.75164	10.124	0.257529	1.07541	0.166516	0.643857
ENSMODT00000003136.4	ENSMODG00000025261	ITGAM	0.157811	0.180133	0.0797654	0.0663217	0.0625506	0.222917	0.0936148	0.178188	0.633681	0.298551	1.3659	1.55934
ENSMODT00000003141.4	ENSMODG00000002531	SYNRG	19.2844	18.4742	28.2587	3.09693	12.2458	10.8485	6.74146	25.8115	37.6884	28.0053	36.8316	44.974
ENSMODT00000003143.4	ENSMODG00000002529	PPP4R3A	0	0.785359	2.5318	0.917325	4.14929	0	0	0	0	0	0	0
ENSMODT00000003145.3	ENSMODG00000002532	PTGER1	0.0204574	1.0876	0.172975	1.75949e-09	0.0395835	0	0.303493	2.97132	2.67394	2.11166	1.83551	3.40847
ENSMODT00000003148.3	ENSMODG00000025712	DIS3L2	8.61855	6.77603	6.7967	11.8363	14.2067	6.48486	11.3923	4.00525	5.85553	6.32097	2.88206	6.8734
ENSMODT00000003151.4	ENSMODG00000002539	IRF6	42.1721	33.6433	23.3885	18.3279	85.0611	32.268	50.625	37.4573	41.0552	34.0241	30.0622	36.8742
ENSMODT00000003154.3	ENSMODG00000025255		0	0	0	0	0	0	0	0	6.34909e-10	1.64823e-10	0.69792	0
ENSMODT00000003157.3	ENSMODG00000002543	KLHDC7A	13.5693	12.2574	51.8577	38.942	27.0273	12.2809	26.1728	13.5985	18.4142	11.5169	1.58278	3.28994
ENSMODT00000003159.4	ENSMODG00000002544	PARPBP	0	0.0885392	0	0	0	0.0279214	0	0	0	0.0812964	0.068191	0
ENSMODT00000003160.4	ENSMODG00000002546	NCK2	24.0262	23.1155	13.8406	7.04934	13.1045	11.4346	9.58004	23.8263	33.9009	22.0981	24.0197	27.7335
ENSMODT00000003162.3	ENSMODG00000002551	GIPC1	64.571	58.741	94.2748	70.8647	63.6538	71.544	75.3363	99.8537	93.063	109.153	63.5727	61.9734
ENSMODT00000003163.4	ENSMODG00000002547	CHAT	0	0	0	0	0	0	0	0	0	0	0	0
ENSMODT00000003164.3	ENSMODG00000002549	DHX38	30.9381	33.6442	26.7621	13.8817	22.5094	15.9693	16.364	28.329	27.8937	25.5026	52.9852	34.7523
ENSMODT00000003166.4	ENSMODG00000002548	CLASP2	11.7959	11.9148	6.53467	4.04721	6.84383	8.14361	8.41418	8.09705	8.69157	7.10073	4.92969	13.3891
ENSMODT00000003169.4	ENSMODG00000002552	SHC4	0.331369	0.364543	0.225593	0	0.107662	0.127261	0.134735	0.147764	0.167634	0.703195	1.20385	1.48844
ENSMODT00000003170.4	ENSMODG00000018682		87.6512	81.2118	67.2728	45.5637	31.7143	80.5796	32.6303	42.4839	37.6511	21.6455	97.2611	100.993
ENSMODT00000003171.4	ENSMODG00000002555	NUP37	29.4866	39.8983	18.5182	30.3716	23.6032	19.8658	21.7152	30.4763	48.0907	46.169	44.7833	43.4905
ENSMODT00000003174.4	ENSMODG00000002501	ALDH1A1	53.5751	67.5588	40.0197	31.6535	10.1596	66.9447	36.7106	36.2956	22.3515	26.5312	191.092	213.566
ENSMODT00000003175.3	ENSMODG00000002558		0	0	0	0	0	0.0397117	0	0.0681095	0	0.0327474	0.234098	5.12665
ENSMODT00000003177.5	ENSMODG00000002559	AATK	0.00343991	1.08978	0	0	0	0.378494	0	0.276121	0	0	0.851709	0
ENSMODT00000003178.3	ENSMODG00000002557	CLCN2	2.00862	1.94936	0	0.0368653	0.0689632	0.806838	0.175859	0.132994	0.176653	0.187248	1.35456	2.12407
ENSMODT00000003179.4	ENSMODG00000002560	TADA2A	15.8518	18.5055	12.9123	5.88876	8.59983	4.27503	6.13062	11.4904	17.34	12.7133	30.8362	28.445
ENSMODT00000003180.3	ENSMODG00000002561	TRIM72	0.0999834	0.0946143	0	0.0239361	0	0.199537	0.158789	0.219247	0.399195	0.327596	0.0750147	0.208835
ENSMODT00000003185.4	ENSMODG00000002563	UTP25	9.88893	11.99	10.6557	3.41283e-07	0.0481428	6.3921e-08	2.74169e-08	13.1226	21.5689	12.9862	34.7406	24.3326
ENSMODT00000003186.4	ENSMODG00000002562	PLK3	1.45369	0.884374	0.435824	0.0784398	28.5283	2.64475	10.0832	9.06802	3.93208	2.56478	0.939017	0.809052
ENSMODT00000003187.3	ENSMODG00000002564	CHPT1	5.52563	7.31437	1.78848	1.59154	3.16982	18.1931	5.99964	18.9662	42.0258	35.376	8.00568	13.8423
ENSMODT00000003188.4	ENSMODG00000002565	CCDC88C	6.03453	8.07313	0.000413939	0.187963	0.901215	1.58538	1.0986	3.04339	5.78153	6.95862	5.5142	13.0383
ENSMODT00000003192.4	ENSMODG00000002541		3.0686	2.81164	2.26594	1.05792	4.32234	3.01571	2.69768	4.87149	3.86918	3.81623	3.12999	3.77817
ENSMODT00000003193.2	ENSMODG00000002570	POLR2H	0.111326	0.392726	0	0.115048	0.690203	0.089746	0	0	0.59757	1.05538	0.625056	0.81392
ENSMODT00000003194.2	ENSMODG00000002571	BEST4	0.717339	1.02715	0.185325	0.375494	0.293688	0.085286	0.0729736	0.0489556	0	0.136626	0.292213	0.465511
ENSMODT00000003195.4	ENSMODG00000002572		2.25274	3.20493	1.64295	0.115468	1.90548	0.425089	0.181134	1.28015	1.5962	1.84756	3.06832	4.05173
ENSMODT00000003196.3	ENSMODG00000002574	GPR68	1.75419	0.969741	0.561681	0	15.3687	51.7355	15.5992	100.969	191.192	215.44	2.15174	4.35446
ENSMODT00000003198.2	ENSMODG00000002575		1.22729	0.499431	0.339921	0.687227	0.244074	0.153628	0.267397	0.831514	0.68436	0.50803	2.65885	2.20506
ENSMODT00000003199.3	ENSMODG00000002576	C17orf78	0	0	0.836186	0.822988	0	0	0	0	0	0	0.38802	1.04848
ENSMODT00000003201.2	ENSMODG00000002578		0	0	0	0	0	0	0	0	0	0	0	0
ENSMODT00000003204.3	ENSMODG00000002581		0.889269	0.963121	0.0697254	0.183327	0	1.10911	0.165705	0.52948	0.968401	0.503849	1.13218	0.96756
ENSMODT00000003206.4	ENSMODG00000002582	CEP152	1.20489	1.56459	0.158528	0.258412	0.864386	0.72643	0.472149	2.2781	5.10598	2.10734	8.10235	9.92984
ENSMODT00000003209.4	ENSMODG00000002586	CD247	1.04404	0	21.4448	16.5786	1.04497	0	3.38383	0.547163	0.333694	0	1.63533	0
ENSMODT00000003210.4	ENSMODG00000002588	ECRG4	8.43978	8.8879	3.09229	4.23337	0.632052	10.3011	1.9386	6.39162	5.08889	6.22204	6.39845	11.0769
ENSMODT00000003211.4	ENSMODG00000002587	DGLUCY	9.94583	6.40141	14.3907	3.087e-09	2.70888	2.20784	2.7414	14.5747	27.8549	13.1684	21.9888	17.2279
ENSMODT00000003212.4	ENSMODG00000002589	CEP131	16.3671	11.9553	5.68146	4.6659	4.48411	3.27561	2.49554	7.51624	9.30629	8.49929	24.463	37.4875
ENSMODT00000003213.4	ENSMODG00000002590	TECR	40.7733	41.8796	60.6595	116.786	124.4	82.6076	62.3592	124.567	154.265	153.705	166.805	180.355
ENSMODT00000003216.4	ENSMODG00000002593		0.467334	0.514534	0.354543	0	1.029	0.348595	0.273854	1.3376	3.03547	1.53324	2.60095	2.9224
ENSMODT00000003217.4	ENSMODG00000002591	TMC1	0.464365	0.235549	0.594497	0	0.398	0.443842	0.570328	0.107164	1.22545	0.0285282	0	0.652087
ENSMODT00000003218.3	ENSMODG00000002592		0	0.0228743	0	0	0	1.57997	0	0.0836883	0.286492	1.1878	0	0
ENSMODT00000003220.5	ENSMODG00000002597	RCSD1	1.11093	1.44582	0.408401	0.189223	0	4.51513	0.360001	4.21152	1.775	3.89436	4.40511	5.49232
ENSMODT00000003221.3	ENSMODG00000002596	NDUFB7	77.8254	84.7276	196.625	320.51	207.945	99.1931	155.816	63.0908	87.6564	98.1619	40.6519	43.9255
ENSMODT00000003222.4	ENSMODG00000002595	RECK	14.4678	15.4228	1.82834	0.599425	1.2416	3.53003	1.45777	4.53487	7.12623	8.03184	32.8054	37.0631
ENSMODT00000003223.2	ENSMODG00000002598	GSS	70.8506	59.1326	69.0887	65.2862	117.525	57.8759	120.798	78.9164	80.7765	63.5431	55.8762	63.082
ENSMODT00000003225.3	ENSMODG00000002600	ZFHX3	0.0121496	0.00103575	7.03817e-07	0	0.00457967	7.5379e-06	0	0.0476811	0.0077132	0.277709	1.22792	0.936906
ENSMODT00000003226.3	ENSMODG00000002601		9.82206	8.14386	3.74924	5.19539	0.929457	4.24722	3.11542	0	0.0931974	0	0	0.158688
ENSMODT00000003228.4	ENSMODG00000002602	SYT14	0	0	0	0	0	0	0	0.0511782	0	0	0	0.220341
ENSMODT00000003230.3	ENSMODG00000002602	SYT14	0	0.0221087	0	0	0.219641	0.0459829	0	0	0.0437862	0.110615	0.066432	0.00253926
ENSMODT00000003231.3	ENSMODG00000019428	ZFAND6	88.4621	73.9287	72.3372	61.3403	215.106	91.5568	147.071	146.921	128.299	112.23	104.664	127.67
ENSMODT00000003235.3	ENSMODG00000002605		54.7445	61.8429	39.0383	20.8635	50.2305	44.243	46.8515	43.9834	40.0376	39.5956	25.002	44.1007
ENSMODT00000003236.4	ENSMODG00000002607	UXS1	57.7904	64.5743	205.584	69.2352	37.4924	55.5184	26.1163	105.707	105.567	111.394	103.108	60.247
ENSMODT00000003239.4	ENSMODG00000002610	CLTA	0	0	0	0	0	0	0	0	0	0	0	0
ENSMODT00000003242.4	ENSMODG00000002614	ACSS2	4.74564	3.00949	6.35608	7.43668	0	2.87761	2.88243	3.26524	4.75578	4.80717	4.05926	8.26504
ENSMODT00000003247.3	ENSMODG00000002618	ST6GAL2	1.22824	1.99445	0.0745754	0.223304	1.46631	0.932129	3.09623	1.26459	0.35863	0.0303961	3.1113	2.35458
ENSMODT00000003250.4	ENSMODG00000002621	HHAT	3.81407	3.96587	2.28835	0.493713	0.113015	0.196465	0.13693	0.713702	1.4503	1.21229	3.68807	3.07218
ENSMODT00000003251.3	ENSMODG00000002620	KIF2C	0	0	0.228798	0	0	0	3.76256e-10	0	0	0.00678284	0.697055	1.49333
ENSMODT00000003253.4	ENSMODG00000002623		9.68331	8.91676	8.76461	3.5114	12.1154	6.31142	11.4339	9.80579	11.19	5.43955	6.93429	17.4246
ENSMODT00000003255.4	ENSMODG00000002624	ECEL1	1.79156e-05	1.61709e-05	0	0	0	0	0	0	0.000153786	0.000520925	0.09911	1.82337e-05
ENSMODT00000003256.3	ENSMODG00000002627		0.182664	0	0.158025	0	0	0	0	0.37617	0	0.331269	0	0
ENSMODT00000003258.3	ENSMODG00000002628	ARMH1	9.35327	6.99812	0.402474	0.35936	0	0.388179	0	0	0.795508	0.668549	2.95164	2.68464
ENSMODT00000003259.3	ENSMODG00000002626	RPS6KA5	3.12315	4.03197	1.03279	0.793557	6.95043	3.20424	1.82001	7.39638	8.88606	8.89643	7.74451	5.16177
ENSMODT00000003260.4	ENSMODG00000002629	SLC38A10	22.3439	22.3112	30.8835	15.9262	77.7419	17.7319	38.7401	48.3142	56.1927	38.0807	60.8556	50.0301
ENSMODT00000003261.4	ENSMODG00000002630	GGT7	0.659673	0.816094	0.0880803	0.238119	0.0759254	0.525872	0.193627	0.33118	0.231697	0.459424	0.998069	1.29484
ENSMODT00000003262.3	ENSMODG00000002631	PSMD7	26.5735	33.5062	56.7033	36.2056	43.6182	22.3987	39.3318	58.7509	59.5454	56.6068	96.3596	69.3422
ENSMODT00000003264.4	ENSMODG00000002632	GNE	2.87996	2.24549	0.883166	0	17.9071	10.4624	7.69529	52.0682	57.7678	29.892	13.5239	19.8898
ENSMODT00000003266.4	ENSMODG00000002636		0.29999	0	0	0	0	0	0	0	0	0	0.177304	0.0469526
ENSMODT00000003267.6	ENSMODG00000002637		5.20822	5.48056	1.55861	0.162972	0.730086	0.930991	0.365381	1.55564	2.0567	1.37888	4.89856	7.72828
ENSMODT00000003271.4	ENSMODG00000002640	PARG	14.642	16.0441	16.9902	1.64627	18.3587	8.19823	6.25825	22.1778	24.3791	15.8743	23.7329	32.09
ENSMODT00000003272.4	ENSMODG00000002641	GDA	3.61204	4.05941	2.1894	1.63329	2.39522	6.11419	3.35806	8.04493	12.813	11.0825	17.2387	15.3395
ENSMODT00000003273.4	ENSMODG00000002644	ERI3	24.7172	31.7326	20.4252	16.3005	16.3206	13.1879	16.5878	8.39032	8.4076	10.1412	17.6081	15.9683
ENSMODT00000003275.4	ENSMODG00000002643	PEX14	10.0714	12.0702	8.57168	6.03146	11.5095	25.0391	26.8418	24.784	18.3176	19.6157	7.21455	9.84966
ENSMODT00000003279.3	ENSMODG00000002646	CHRND	0	0	0	0	0	0	0	0	0	0	0	0
ENSMODT00000003280.4	ENSMODG00000002645		5.48795	2.20588	3.64891	1.39326	1.45977	2.25711	5.86838	6.97549	12.2242	16.1888	12.1626	9.91136
ENSMODT00000003281.3	ENSMODG00000002647		3014.65	3234.13	1056.37	912.224	1161.83	3075.9	3076.02	2329.19	2877.87	4162.22	4221.01	2323.87
ENSMODT00000003283.2	ENSMODG00000002648		41.939	40.2368	52.9237	72.0349	20.8655	54.7007	60.3372	24.1424	17.7813	19.9593	13.1468	18.3007
ENSMODT00000003285.4	ENSMODG00000002650	SLC5A7	0.0872884	0.234292	0	0	0	0	0.0191427	0	0	0	0.209581	0.104173
ENSMODT00000003286.5	ENSMODG00000002651	NCOA6	17.1796	18.8163	15.4808	3.22942	16.9832	8.31837	7.21537	14.9974	16.1509	15.0264	26.4275	27.2533
ENSMODT00000003288.4	ENSMODG00000002652		1.4701	1.16737	3.54011	1.01877	0.47216	2.1815	1.38894	2.28598	6.96434	3.43717	2.5239	3.75047
ENSMODT00000003289.3	ENSMODG00000002653	RCC2	21.6731	33.344	12.7433	21.0302	27.1863	9.90141	10.8968	23.1501	25.2464	18.1561	27.799	35.1371
ENSMODT00000003290.3	ENSMODG00000002654		10.1388	9.99141	10.6853	3.42549	7.73687	3.02502	3.3414	4.98785	4.34613	3.69061	11.0734	8.85543
ENSMODT00000003291.3	ENSMODG00000002655	WWP2	14.2602	13.6214	26.7607	8.30582	55.35	11.5954	19.4921	27.7186	26.8151	16.9301	23.6536	20.9666
ENSMODT00000003294.3	ENSMODG00000002659	C3orf70	13.0829	16.9539	0.959269	0.26335	0.968869	2.50958	0.341184	1.52308	2.26982	2.92535	7.60699	8.28061
ENSMODT00000003295.4	ENSMODG00000002660	DFFA	9.62694	9.23749	6.59738	6.5994	25.6648	48.6054	105.451	40.4837	23.0549	26.4087	8.11892	11.0241
ENSMODT00000003296.4	ENSMODG00000002661		82.123	96.7776	88.9706	95.2335	102.682	84.0568	91.1285	79.4006	82.7071	86.3332	71.9676	81.7764
ENSMODT00000003297.4	ENSMODG00000002663		1.0941	1.54344	0	0.0644418	0	1.0908	0.456871	1.38118	0.885429	0.927538	0.422391	1.89533
ENSMODT00000003298.4	ENSMODG00000002662	FSCN2	0.116363	0.0447993	0.0500792	0	0	0.0234382	0	0	0.0929114	0.0385881	0	0
ENSMODT00000003300.4	ENSMODG00000002664	TP53INP2	2.87481	2.75133	28.782	4.11722	21.804	6.22348	4.73628	6.97639	6.94589	6.07762	1.25716	2.6387
ENSMODT00000003303.3	ENSMODG00000002666	CHRNG	0.47911	0.771331	0.101101	0	0.128225	0	0.241242	0.0413543	0	0.0390799	0.176248	0.198261
ENSMODT00000003304.4	ENSMODG00000002665	RNF38	9.00724	12.777	7.02611	1.62902	19.5041	3.58068	2.80137	10.9267	13.6371	15.0811	14.1218	14.1389
ENSMODT00000003305.3	ENSMODG00000002667	FOLH1	1.53235	2.24522	0.33568	0.0915162	1.07359e-07	0.400686	0	0.0964256	0.437277	0.184394	5.57519	10.9804
ENSMODT00000003307.4	ENSMODG00000002668	PGD	31.4105	32.6918	38.3055	39.4569	72.5522	83.6306	212.793	56.162	71.1327	130.847	50.3812	36.227
ENSMODT00000003308.4	ENSMODG00000002672	FAAP100	5.34601	6.70329	3.71176	2.14482	4.54332	5.43161	2.82646	11.7557	11.1565	10.3403	10.4065	14.1906
ENSMODT00000003310.3	ENSMODG00000002671	EHHADH	5.31639	5.71313	8.31247	1.20627	7.38532	3.53329	1.49854	3.88624	1.82096	1.58712	6.95806	4.23053
ENSMODT00000003312.3	ENSMODG00000002674	GALNT7	0	0	0	0	0.490536	0	0	0	0	0	0	0
ENSMODT00000003313.3	ENSMODG00000002677	NOB1	43.6639	51.8253	19.2067	13.0944	14.5796	10.9697	8.14657	15.6182	32.929	17.0443	61.0048	44.9329
ENSMODT00000003314.4	ENSMODG00000002675	FBN1	11.1269	10.5395	9.06408	1.97414	3.49615	7.5532	3.21568	11.4309	11.4085	13.9978	27.1587	27.398
ENSMODT00000003315.3	ENSMODG00000002679		0	0	0	0	0	0	0	0	0	0	0	0
ENSMODT00000003316.4	ENSMODG00000002678	TTC7B	4.83154	6.93105	4.6876	2.91999	4.25524e-06	1.81237	0	2.13048	4.20988	5.2291	23.1888	13.5641
ENSMODT00000003321.4	ENSMODG00000002682	NCOA4	81.2465	83.6574	178.139	67.4857	1253.34	58.0415	289.276	194.74	204.119	104.183	211.527	194.888
ENSMODT00000003322.4	ENSMODG00000002683	PIGU	40.6898	44.0374	26.8791	18.3485	21.004	15.1577	14.1456	17.2575	22.7523	20.6868	66.011	44.5903
ENSMODT00000003323.3	ENSMODG00000002686		0	0	0	0	0	0	0	0	0	0	0.260856	0
ENSMODT00000003324.3	ENSMODG00000002687		54.5938	132.716	39.4401	50.1173	4.78515	19.0895	26.6179	7.89284	10.948	13.6332	60.0132	71.106
ENSMODT00000003325.3	ENSMODG00000045815		0.331565	0.312392	0.0864346	0	0	0.0800729	0	0.22613	0.258153	0	0.290129	0.324419
ENSMODT00000003327.4	ENSMODG00000028671		0	0.084681	0	0	0	0	0	0	0	0.0627482	0.198263	0.126339
ENSMODT00000003329.4	ENSMODG00000002685		1.46088	0	1.28925	0	50.8001	0.228238	1.15052	45.8624	48.829	47.9542	48.0488	54.0696
ENSMODT00000003331.3	ENSMODG00000002689	PADI4	0.204647	0.199924	0.402391	0.464048	0.589235	0.284505	0.575958	0.226476	0.588219	0.496087	0.332537	0.373676
ENSMODT00000003332.3	ENSMODG00000002690		11.6331	16.7939	23.826	2.48948	5.96957	9.79759	5.73935	14.634	12.0353	9.35526	10.095	12.3719
ENSMODT00000003333.4	ENSMODG00000002691		3.33574	3.26441	1.81991	1.20124	1.39036	1.53948	1.84451	2.81396	3.78909	3.25541	3.68553	4.41494
ENSMODT00000003334.4	ENSMODG00000002688	RCOR3	25.9343	24.2248	16.4194	5.69027	10.9369	13.493	6.25638	16.2794	28.7745	27.2965	27.0063	36.6375
ENSMODT00000003336.1	ENSMODG00000002694	MAP1LC3A	359.34	297.418	126.474	116.083	433.976	280.55	420.89	291.687	406.99	300.64	108.314	195.278
ENSMODT00000003339.4	ENSMODG00000002696	CALM1	479.634	548.216	467.206	517.006	116.681	237.137	163.071	403.622	602.59	574.181	819.098	869.941
ENSMODT00000003341.3	ENSMODG00000002697		7.05122	9.10995	4.25292	0.309598	4.02413	1.22695	1.57444	2.87327	3.87688	4.33728	8.00203	7.55836
ENSMODT00000003342.3	ENSMODG00000051427		1.68282	1.01526	1.69901	0	0.775369	1.34063	1.49906	3.89587	4.75012	3.95604	3.51636	7.30656
ENSMODT00000003343.3	ENSMODG00000002699		0.0300659	0.0588122	0	0.031237	0	0	0.270441	0	0	0	0.0882428	0.0992284
ENSMODT00000003344.2	ENSMODG00000002702	DYNLRB1	69.8701	151.197	141.36	179.419	160.324	144.405	191.724	21.575	50.4632	78.2733	18.1149	65.9547
ENSMODT00000003347.2	ENSMODG00000002704	CAPN10	8.96163	7.49991	3.92071	0.943089	4.70011	2.62578	2.36147	4.46114	5.75424	3.22522	5.91177	13.2036
ENSMODT00000003348.4	ENSMODG00000002703	SULT1C3	0	0	0	0	0	0	0	0	0	0.0677799	0	0
ENSMODT00000003349.4	ENSMODG00000002705	DMAP1	14.653	16.5409	17.864	11.0528	18.1723	17.7524	19.7019	17.6297	20.421	18.6079	11.3676	14.0221
ENSMODT00000003350.2	ENSMODG00000002375		0	0	0	0	0	0	0	0	0	0	0	0
ENSMODT00000003352.2	ENSMODG00000002707	NQO1	211.57	233.713	304.829	242.014	187.256	111.69	293.961	113.718	209.693	226.355	225.685	197.261
ENSMODT00000003353.3	ENSMODG00000002709	PDE6G	2.66109	6.69193	1.27027	1.93079	4.49419	2.45203	3.43903	9.19468	11.7137	4.86656	5.9632	5.53965
ENSMODT00000003354.4	ENSMODG00000002708	MAP3K13	1.24472	1.01003	2.07312	0.672897	2.07459	0.594174	0.727033	1.24229	2.03546	1.47226	0.894839	1.28035
ENSMODT00000003357.4	ENSMODG00000002711	NRDE2	26.2744	30.0317	16.7565	12.3764	7.0636	9.66934	10.7111	15.6702	21.6923	19.0612	35.3621	27.6349
ENSMODT00000003359.4	ENSMODG00000002710	CEMIP2	7.3574	7.47632	8.38423	1.4418	9.52855	9.65445	1.51028	16.2025	27.6909	32.9093	14.3828	12.4395
ENSMODT00000003361.4	ENSMODG00000002713	CCDC137	0	0	0	0	8.25746	0	3.05691e-09	2.63238	5.93466	8.19798	18.3	11.4002
ENSMODT00000003362.3	ENSMODG00000002715		22.7778	23.8299	17.2018	15.5109	15.2898	23.9025	15.1152	11.28	10.0439	14.8798	11.3096	16.5858
ENSMODT00000003363.4	ENSMODG00000002714	GLI3	2.83094	2.52612	0.170979	0.0485508	0.407246	0.579167	0.343316	1.05571	1.14392	0.667404	1.96208	5.35999
ENSMODT00000003365.3	ENSMODG00000002716		12.2035	31.6392	0.216793	0.196977	0.459381	0.361662	0.430278	0.552104	0.314148	0.479668	2.39027	2.9271
ENSMODT00000003366.3	ENSMODG00000002718		6.22839	9.37066	1.98355	1.16662	1.67297	0.41297	1.76938	3.79385	5.36947	6.07379	15.3922	14.3539
ENSMODT00000003368.4	ENSMODG00000002719	SLC12A1	0.110474	0.764688	0.150794	0.12951	85.6795	1.54666	35.6995	30.1908	29.6984	4.34695	0.164576	0.256406
ENSMODT00000003371.5	ENSMODG00000002721	INHBA	6.85546	9.68719	8.40909	0.452759	8.15631	1.81828	1.6388	4.13546	5.00175	7.51243	22.7367	11.5
ENSMODT00000003373.3	ENSMODG00000002720	PAX5	0	0	0.0312986	0	0	0	0	0	0	0	0.0864299	0
ENSMODT00000003374.3	ENSMODG00000002723	TRAF5	3.23502	2.41527	0	0	0.274555	1.1275	0	1.06543	3.25436	2.67049	8.96941	10.1875
ENSMODT00000003377.3	ENSMODG00000002724	SHLD2	10.2248	10.8881	5.3718	2.22967	3.14234	4.12082	4.94969	1.25255	2.82516	2.01404	3.21097	2.87094
ENSMODT00000003378.4	ENSMODG00000002722	PTPRG	7.53398	11.5292	1.19005	0	1.17513	3.06807	0	1.98036	2.6058	6.10325	11.6606	10.8942
ENSMODT00000003380.4	ENSMODG00000002725	PSMC1	135.996	152.905	156.768	137.491	104.987	106.341	121.956	163.559	211.095	210.086	260.718	238.333
ENSMODT00000003391.3	ENSMODG00000002731	PADI3	0	0	0.0231262	0.0214703	0	0.0870255	0.0547459	0.0379921	0.302526	0	0	0
ENSMODT00000003392.4	ENSMODG00000002732	ITCH	16.1764	17.2169	18.0834	3.33529	20.9828	11.1414	9.30509	34.4969	44.8245	37.4613	33.7206	37.703
ENSMODT00000003393.4	ENSMODG00000023829		0.793499	0.60953	43.3346	19.9042	77.4022	63.1335	111.663	124.023	65.264	38.48	2.08876	2.62225
ENSMODT00000003394.4	ENSMODG00000002729	ZCCHC7	17.7405	21.1012	9.2855	5.07324	15.8269	5.47849	8.05498	10.081	13.8191	10.568	28.0169	24.6633
ENSMODT00000003398.3	ENSMODG00000002738	FEZF2	0.0563346	0.0324748	0.120931	0.0334201	0	0.0898104	0.0716995	0.0425192	0.0242066	0.099651	0.0548138	0.101708
ENSMODT00000003400.4	ENSMODG00000002739	NOX4	0.828004	0	0.225877	0	1.2839	2.87405e-10	1.90422	4.35198	1.96094	1.65168	2.74041	1.61489
ENSMODT00000003403.2	ENSMODG00000002742	LIPH	0.586592	0.601015	0.8336	1.40734	15.869	13.1021	21.0223	18.03	18.5052	21.4062	1.17197	2.65465
ENSMODT00000003405.4	ENSMODG00000002743	NFAT5	9.71368	10.5264	7.09364	1.20291	3.12679	4.08861	0.935384	12.9012	11.9297	16.1352	20.3696	20.4159
ENSMODT00000003406.4	ENSMODG00000002744	MYEF2	1.99653	4.87531	4.87257	0.902349	1.79161	0.723174	0.458336	2.61976	5.63511	4.77572	1.78145	7.63946
ENSMODT00000003408.3	ENSMODG00000002734	USP34	0.26281	0.450826	0.261765	5.76804	0.544346	2.28823	2.64413	1.25916	1.32607	1.05648	0.610698	1.49425
ENSMODT00000003410.3	ENSMODG00000002746		0.0770931	0.0578064	0	0	0	0.0517021	0.0436186	0.0470075	0.0713311	0	0.0267914	0.150802
ENSMODT00000003411.4	ENSMODG00000025482		0	0	0	0	0	0	0	0	0	0	0	0
ENSMODT00000003414.3	ENSMODG00000002748		18.7196	19.9645	44.6182	7.56738	40.4809	37.8038	21.3205	26.3325	15.9123	24.2512	5.39481	12.3538
ENSMODT00000003416.3	ENSMODG00000002749	CYB5B	0.31303	0.232463	0.0839319	0	0	0	0.304205	1.33023	1.56538	1.32791	3.18202	3.28206
ENSMODT00000003420.4	ENSMODG00000002750	TRPM3	0	1.11273e-10	0	0	2.07083e-09	6.2075e-10	5.94724e-10	4.45379e-10	0	9.62443e-09	0	1.77343e-09
ENSMODT00000003421.2	ENSMODG00000002753	AHCY	71.7209	119.006	44.6465	41.323	38.9001	58.0645	53.8278	38.2844	47.7432	57.6379	132.86	103.817
ENSMODT00000003422.4	ENSMODG00000002751		18.7735	22.4514	1.79256	1.99567	3.65	12.0269	7.44473	15.29	15.2382	18.6742	31.907	34.8531
ENSMODT00000003425.4	ENSMODG00000002755	TYR	0.0207457	0.0205033	0.0453106	0	0.981659	0.514802	0.189974	0.558558	1.52151	0.0710961	0.0961535	3.83486
ENSMODT00000003426.4	ENSMODG00000002756		62.8196	61.8396	29.1819	12.7854	114.955	110.563	57.1501	94.3379	56.2398	67.3636	51.3734	66.2675
ENSMODT00000003427.3	ENSMODG00000002757	PADI2	0.423448	0.118258	1.32533	5.97928e-07	101.905	70.2216	170.556	67.0958	6.78076	39.1332	0.929059	1.10117
ENSMODT00000003428.3	ENSMODG00000002759		0	0	0	0	0	1.10962	0	0.248206	0	0.943529	0	0
ENSMODT00000003430.3	ENSMODG00000002760	KLF9	5.8569	3.67909	4.46708	2.25412	13.6078	11.8343	8.1723	19.85	20.2107	11.3866	6.56958	7.67496
ENSMODT00000003431.3	ENSMODG00000002762	ASIP	0.272987	0.288838	0.490294	0.161607	0.149762	0.217093	0.24071	0.375419	0.534008	0.0998383	0.160493	0.225515
ENSMODT00000003434.4	ENSMODG00000002761	SLC24A5	2.46889	2.74844	4.1273	0.93752	0.991503	0.431106	1.26745	2.94421	5.95466	3.71793	10.3266	12.1414
ENSMODT00000003435.3	ENSMODG00000002764	SULT1C2	4.38276	4.35361	2.65596	1.04169	18.358	6.61216	40.1954	10.1653	12.8364	11.7958	10.3477	14.901
ENSMODT00000003436.3	ENSMODG00000002765		0.546166	0.605542	0.314034	0.177837	0	0.296188	0.367993	0.676033	1.04916	1.30395	1.39393	1.55165
ENSMODT00000003438.2	ENSMODG00000002768		0	0	0	0	0	0	0	0.167474	0	0.152312	0	0
ENSMODT00000003439.4	ENSMODG00000002767	SVOP	0.0270329	0.0520071	0	0	0	0	0.034741	0	0	0	0	0
ENSMODT00000003440.3	ENSMODG00000002769	PTCH1	4.4857	9.48839	0.499253	0	0	0.00775415	0.0152458	0.0192935	0.454589	0.803123	8.20502	6.96518
ENSMODT00000003442.4	ENSMODG00000002770	SDHB	46.2079	47.5604	79.931	80.1365	67.6312	53.514	85.1222	57.442	52.5917	49.8675	51.7268	43.4509
ENSMODT00000003443.2	ENSMODG00000002771		55.6823	62.7746	521.167	343.104	31.1018	15.789	11.075	14.9659	24.2609	26.35	41.4468	46.3121
ENSMODT00000003444.3	ENSMODG00000002772		0	0	0	0	0	0	0	0	0	0	0	0
ENSMODT00000003447.4	ENSMODG00000002773		0.135609	0.371868	0.133932	0.0235347	0	0.131962	0.0703155	0.338713	0.389033	0.496382	0.390229	0.829416
ENSMODT00000003448.3	ENSMODG00000023148		10.2867	11.2333	10.8717	3.50793	5.50778	2.2776	3.18683	9.32836	16.6766	11.4312	30.4641	27.6048
ENSMODT00000003449.4	ENSMODG00000027581		0	0	0	0	0	0	0	0.220995	0	0	0	0
ENSMODT00000003453.3	ENSMODG00000002778		4.57931	3.15996	2.84171	1.51711	3.64808	1.50742	2.12779	4.031	8.398	2.2512	2.43043	11.7781
ENSMODT00000003455.4	ENSMODG00000002779	ADCY10	0	0	0	0	0	0.0154715	0	0	0.329934	0	0	0
ENSMODT00000003456.2	ENSMODG00000002782	NIP7	66.0522	81.4012	21.3177	15.6032	21.3232	18.1976	15.9216	23.0095	50.9725	44.7691	76.3018	56.6674
ENSMODT00000003458.2	ENSMODG00000002783		20.161	21.7918	19.0752	12.7768	13.7828	21.5666	24.2342	29.783	25.5294	25.841	20.8677	17.2325
ENSMODT00000003459.1	ENSMODG00000002785	PDF	19.516	21.7859	26.7504	34.9782	8.90031	29.1063	21.3243	18.3082	14.1674	25.2509	16.3835	15.1974
ENSMODT00000003463.3	ENSMODG00000002788	NEK2	0.00606629	6.42115	3.09974e-08	0.570901	1.08977	0.566637	0.134711	1.06003	0.512179	0.763649	16.5173	41.7751
ENSMODT00000003466.4	ENSMODG00000002798	AOPEP	0.147589	1.17355e-05	2.82574e-09	0	0	0	0.326942	1.38237	0.407673	1.18551	0.320741	0.822618
ENSMODT00000003467.4	ENSMODG00000002793	ATP13A2	2.0649	2.14594	8.6152	0.443772	11.5108	1.20494	1.73728	1.24305	0.561839	1.7694	0.852837	0.938655
ENSMODT00000003469.4	ENSMODG00000002794		1.25964	2.41393	0.518031	0.606794	3.616	13.7672	2.752	4.36214	2.35441	4.30642	1.34051	1.2534
ENSMODT00000003471.4	ENSMODG00000002796	VAV3	3.66436e-09	4.37162e-09	1.48511	1.10729e-08	0	7.35665e-08	1.13466e-09	8.07357e-09	0	2.82161e-10	2.2758e-05	0.0196491
ENSMODT00000003472.4	ENSMODG00000002797	LPGAT1	1.01458	1.60616	4.04803	0.337534	1.05701	0.511791	0.664491	0.612796	0.698567	0.588031	0.532728	0.995074
ENSMODT00000003476.4	ENSMODG00000002800	HGS	32.7038	33.6149	31.6703	18.6657	53.9343	30.4727	33.8843	33.6833	49.6367	44.0795	51.3108	42.3926
ENSMODT00000003477.4	ENSMODG00000002801	SMC5	3.91406	4.60601	2.49025	1.00705	1.28696	1.81755	1.18821	4.70066	10.6453	6.04247	13.3719	15.5633
ENSMODT00000003478.4	ENSMODG00000002802	KIF1B	0.402176	0.530372	0.476993	0	0	0.000516834	0	3.40039	0.486038	0.744388	1.56229	4.26167
ENSMODT00000003482.4	ENSMODG00000002805	EIF2S2	139.269	150.461	193.342	164.617	80.6522	105.703	103.234	134.969	154.248	140.518	231.678	174.092
ENSMODT00000003487.5	ENSMODG00000002837	PALLD	0.264742	0	0	0	0	0	0	0	0.346879	0	1.0682	1.88874
ENSMODT00000003489.4	ENSMODG00000002810	JAKMIP1	0	0	0	0	0	0	0	0	0	0	0	0
ENSMODT00000003491.3	ENSMODG00000002812	MAMDC2	13.4711	22.3082	7.23284	5.28794	0.470846	3.49486	1.06706	6.50188	8.83725	15.7276	13.8831	8.0885
ENSMODT00000003492.4	ENSMODG00000003225		0.955231	0.599744	0	0.242752	0.636282	0.524114	0.245585	0.366024	0.283386	0.34015	0.71885	0.8735
ENSMODT00000003493.4	ENSMODG00000002814	NTNG1	0	0	0	0	0	0.197541	0	0	0	0	0.82211	0
ENSMODT00000003494.4	ENSMODG00000002813		0.26348	0.243487	0.0847726	0.0352729	0.0667974	0.0675015	0.0983377	0.288902	0.647949	0.270256	0.431569	1.00421
ENSMODT00000003500.4	ENSMODG00000002818	FBP2	0	0	0.0264256	0	0.25302	0.14954	0.0939985	0.167693	0.0951976	0.280661	0	0
ENSMODT00000003501.4	ENSMODG00000002819		115.758	122.952	82.7138	77.8864	18.5355	31.1892	34.6162	38.664	42.6346	37.6302	58.3801	65.0874
ENSMODT00000003502.5	ENSMODG00000002820	ZNF862	0.856737	1.05254	0.390589	0	0.413659	0	0.0509986	0.315439	1.43956	0.223593	1.89158	1.73689
ENSMODT00000003504.3	ENSMODG00000002821	PTAR1	5.84602	7.65181	6.15943	0.56955	5.32401	1.35277	1.37409	6.71884	12.4918	6.69743	25.0486	20.7714
ENSMODT00000003505.2	ENSMODG00000002822	IGF2BP2	34.3785	35.8251	18.2228	5.91197	14.5875	2.56806	5.95974	10.7157	16.6324	7.16818	14.0457	18.2958
ENSMODT00000003506.2	ENSMODG00000002823	PRMT6	18.3543	21.6717	4.09817	1.52776	1.261	5.52665	2.43337	5.23023	6.04359	6.30379	11.4119	17.8357
ENSMODT00000003507.3	ENSMODG00000002824	CORO1C	36.4559	33.4977	48.6244	33.2835	27.6541	51.8476	49.9205	58.9619	56.5059	65.994	39.5826	43.5096
ENSMODT00000003509.4	ENSMODG00000002825	WFS1	7.56309	6.61107	6.22873	3.31424	13.0684	11.9192	14.138	32.0368	20.9417	38.1052	28.4917	11.2177
ENSMODT00000003511.4	ENSMODG00000002817	DNAH5	5.88688	3.05758	1.96452	0.272738	1.90176	0.209684	0.556719	1.41802	1.68895	1.45339	12.9735	15.2316
ENSMODT00000003512.2	ENSMODG00000002826		0.0626047	0	0.0704776	0	0.373148	0.0663066	0.0832565	0	0	0.0910917	0	0
ENSMODT00000003516.4	ENSMODG00000002830	CHMP4B	141.368	138.181	186.848	116.544	181.135	195.379	239.018	224.764	175.688	186.013	125.019	124.58
ENSMODT00000003517.4	ENSMODG00000002829	GCC2	17.4292	16.7573	29.9486	7.18741	14.3124	13.5714	8.26582	33.2658	43.7735	41.3428	54.0088	62.1273
ENSMODT00000003519.3	ENSMODG00000002831	XPO1	55.3167	75.3642	60.8132	25.7102	18.3205	25.2375	22.5689	68.8673	127.134	77.3096	201.131	323.955
ENSMODT00000003523.3	ENSMODG00000002836		6.47858	7.41918	2.59971	1.53773	0.610722	0.53086	0.691327	1.37555	2.5977	2.43755	3.17244	4.8397
ENSMODT00000003526.4	ENSMODG00000002838	UBE4B	51.1622	49.4205	45.7881	14.8218	29.5666	25.3333	20.613	31.0239	52.898	35.7914	42.0993	63.6313
ENSMODT00000003528.5	ENSMODG00000002842	SEMA6D	6.41467	6.0745	1.49124e-06	2.05057e-06	2.17007	7.20046	2.68116e-05	7.02781	16.8445	28.5137	4.02149	5.67041
ENSMODT00000003531.4	ENSMODG00000002844		0.142529	0.382672	0	0.20658	43.5647	24.8812	38.5692	80.0619	0	0.0178273	0	0
ENSMODT00000003533.3	ENSMODG00000002849		0.0537567	0.087026	0.0191579	0.0737291	0	0.0545557	0	0	0.0369409	0.0309389	0	0.0312764
ENSMODT00000003534.5	ENSMODG00000002848	APBA1	1.08105	1.23139	1.21498	0	0.586214	0.174663	0.0303844	0.743753	1.04989	0.590667	0.351367	2.52976
ENSMODT00000003535.3	ENSMODG00000002850		0.432628	0.0314547	1.4268	1.39612	0	0.707504	0.464879	2.50512	1.49251	0	3.4223	7.09526e-08
ENSMODT00000003540.4	ENSMODG00000005897	GAR1	88.5071	85.4934	81.412	38.1752	68.0487	58.6268	58.6075	87.212	80.0224	76.0202	63.0815	51.2872
ENSMODT00000003541.3	ENSMODG00000006063		1.59672	1.8472	0.539116	0.568537	0.603573	0.782679	0.981959	1.64711	3.83873	1.34103	1.04565	1.93741
ENSMODT00000003544.4	ENSMODG00000002856	ZNF341	0	0	0.670876	0	0.512848	0	0	0	0	1.20872	0.508271	0.292331
ENSMODT00000003546.4	ENSMODG00000001528		10.6056	12.9343	1.42071	0.738125	3.17822	3.43921	2.14512	4.87451	4.42739	3.94156	2.85327	8.27157
ENSMODT00000003547.4	ENSMODG00000002855	DCAF6	0	0	0	0	0	0	0	0	0	0	0	0
ENSMODT00000003550.3	ENSMODG00000002917	NAA25	0.19505	0.37338	0.179472	0.196031	0.452723	2.6485	0.247016	0.774958	0.884241	2.77253	1.54692	1.15268
ENSMODT00000003552.4	ENSMODG00000002861	RBP7	13.4913	6.35005	7.23553	13.2495	3.4838	30.9187	3.22151	26.6621	17.2039	33.7428	22.5955	39.8865
ENSMODT00000003553.4	ENSMODG00000002862	GRHPR	39.5615	41.0077	86.4718	131.205	10.8421	30.9311	36.604	60.7038	77.7577	66.5508	76.7147	57.1011
ENSMODT00000003555.4	ENSMODG00000002864	PXMP4	13.698	15.0648	27.4719	6.49578	3.45555	5.68007	4.18526	8.78673	15.4239	8.82364	17.3949	18.1998
ENSMODT00000003557.3	ENSMODG00000002865	LIMS1	0	0.100529	0	0	0	0.100069	0.252743	1.39083	2.74538	1.74527	1.4738	0.559538
ENSMODT00000003558.3	ENSMODG00000002866		5.82835	6.46174	0	0	0	0.444621	0.589228	0.630765	1.09514	0.855052	2.48039	1.66903
ENSMODT00000003560.3	ENSMODG00000002867	SH3BP4	18.3017	21.8815	10.1886	4.82299	21.3977	7.60191	5.04893	12.0142	14.2531	9.08929	11.7996	18.5022
ENSMODT00000003561.4	ENSMODG00000002868	ERP29	55.6231	54.6195	120.828	127.22	100.5	89.3059	99.3451	89.9275	71.2894	117.248	38.8387	47.4108
ENSMODT00000003562.4	ENSMODG00000002869	FAM189A2	50.5997	42.9556	62.4785	46.1377	20.0359	40.7212	63.7802	52.4867	69.0163	76.726	38.7446	50.4656
ENSMODT00000003565.4	ENSMODG00000002870	GPR161	4.05989	4.21875	0.895658	0.219418	0.668553	0.577375	0.575234	1.58224	1.61468	2.66004	8.96151	8.922
ENSMODT00000003569.4	ENSMODG00000002875	E2F1	2.0445	4.84856	3.7842	1.07611	1.18089	1.45895	1.17053	1.44864	1.01398	0.894858	6.83559	5.03952
ENSMODT00000003571.4	ENSMODG00000002876	SH3RF1	4.99042	4.95993	6.15906	1.65227	26.8999	15.2162	13.1229	30.9704	19.8191	17.7856	2.5524	5.67088
ENSMODT00000003574.4	ENSMODG00000003195		0.583704	0.394135	0.188013	0.0835437	0.188981	0.493412	0.273767	0.453404	0.559064	0.454852	0.667512	1.59477
ENSMODT00000003575.3	ENSMODG00000002880		0.753303	0	0.755802	0	7.47951	0	0	14.8591	19.2812	10.4623	19.1217	10.5379
ENSMODT00000003576.3	ENSMODG00000002874		0	0	0	0	0	0	0	0	0.138781	0	0	0
ENSMODT00000003579.3	ENSMODG00000002882		1.34711	1.73997	0.307215	0	82.6719	0.478341	0.303165	0.621824	3.10158	1.21785	6.35769	5.20524
ENSMODT00000003580.3	ENSMODG00000002882		126.325	152.178	124.424	94.446	28.2266	71.8312	89.051	157.961	217.705	172.05	232.525	252.573
ENSMODT00000003581.3	ENSMODG00000002884	POLR1E	49.7448	57.7543	29.6326	37.5123	22.1544	40.5769	32.6424	51.2321	62.0564	46.6805	53.8609	49.1369
ENSMODT00000003582.4	ENSMODG00000002883	INTS7	0	0	0	0.00414697	0.00136317	0	0	8.43821e-08	4.65495e-08	0	0	0
ENSMODT00000003584.4	ENSMODG00000002847	LRP1B	1.27097	1.36186	0.0314495	0.0262293	0.0292105	0.0829235	0.0260881	0.299786	0.438889	0.271271	8.37582	5.81627
ENSMODT00000003585.2	ENSMODG00000002885	LZIC	32.0825	30.5784	38.7166	37.9074	6.84939	21.3748	30.2989	18.9214	26.5626	38.2693	25.6881	24.2699
ENSMODT00000003590.3	ENSMODG00000002887	COMMD1	4.86497	2.66532	4.42623	1.3071	0	3.52783	5.54712	6.28503	10.9833	4.75511	7.98596	9.20016
ENSMODT00000003592.4	ENSMODG00000002889	MAN2B2	98.5377	104.782	37.6789	24.1651	43.2813	22.9972	28.194	25.1261	35.0291	36.363	102.106	44.0058
ENSMODT00000003594.2	ENSMODG00000002891	WSCD2	0.761838	2.1837	0.0543582	0	0.086514	0.0508762	0.0215539	0	0	0	2.27828	1.37469
ENSMODT00000003601.4	ENSMODG00000002894		1.76401	2.14479	0.831673	0.212298	0.307196	0.620677	0.434572	1.12198	1.92007	1.0228	2.28462	3.79602
ENSMODT00000003602.3	ENSMODG00000002895	TMEM17	40.1998	38.4448	23.0857	19.7513	10.8448	21.1489	11.7666	36.4532	40.7954	41.5218	59.7555	85.038
ENSMODT00000003603.3	ENSMODG00000002896	SFT2D2	0	0	24.1937	0	0	0.000336539	0.188543	0	0	0	0	0
ENSMODT00000003604.3	ENSMODG00000002897	S100P	0	0.0660001	0	0	0	0	0	0	0	0	4.61249	2.38978
ENSMODT00000003606.3	ENSMODG00000002898	FBXO10	0	0	0.0220947	0.0366556	0	0	0	0	0	0	0	0
ENSMODT00000003610.4	ENSMODG00000002902	MRPL12	0	0	2.48543	0	54.5347	0	0	79.1358	89.8064	79.0104	105.616	102.304
ENSMODT00000003612.6	ENSMODG00000002901	CADPS	0	0	0	0	0	0	0	0	0	0	0	0
ENSMODT00000003613.3	ENSMODG00000002903		0	0	0	0	0	0	0	0	0	0	0	0
ENSMODT00000003615.4	ENSMODG00000002906	KIAA0232	6.65822	6.37989	9.65801	0.45755	10.9586	2.84432	2.14903	11.3334	8.68504	10.7915	20.7157	21.9058
ENSMODT00000003616.3	ENSMODG00000002905		5.50545	6.91303	0.616069	0.415164	0.655662	1.25365	2.09907	4.32995	10.846	3.44629	27.8918	34.362
ENSMODT00000003621.3	ENSMODG00000002910	DTL	0.078537	0.527055	0.288683	0	0	0	0	0	0	0	1.02088	1.09861
ENSMODT00000003622.4	ENSMODG00000002909		4.95779	5.90064	3.45915	0.134649	4.41508	1.85028	0.976004	6.2628	6.21445	5.85141	10.4532	9.08635
ENSMODT00000003626.3	ENSMODG00000024214		7.4168	3.84326	0.320796	1.2348	0.800871	0	2.37254	4.31252	5.26306	6.61886	2.19551	3.26338
ENSMODT00000003629.3	ENSMODG00000002912	CMA1	0.355225	0.30065	0.0550719	0	0	0.156372	0.326805	0.157593	0	0.0753985	0.135334	0.152309
ENSMODT00000003630.3	ENSMODG00000002915		6.06974	5.43065	5.74025	1.47867	9.33377	7.50695	3.56377	9.7415	10.5128	11.4563	2.20413	5.13383
ENSMODT00000003632.4	ENSMODG00000002914	RANBP2	12.8055	11.8917	13.8733	3.81239	14.8798	9.54469	9.66438	28.4165	36.0498	23.1265	43.9572	46.3585
ENSMODT00000003633.4	ENSMODG00000002918		0.190974	0.208845	0	0.0209124	0	7.19686	0.0247368	5.46929	8.26819	26.2668	0.318193	0.293067
ENSMODT00000003634.3	ENSMODG00000002920		0	0	0	0	0	0	0	0	0	0	2.35245	0
ENSMODT00000003635.3	ENSMODG00000002917	NAA25	5.14719	5.62691	5.14429	0.69374	3.43292	0.759147	1.52861	5.831	6.60781	2.69229	14.2888	10.6417
ENSMODT00000003636.2	ENSMODG00000002921	TBX19	0	0	0	0	0	1.6667e-08	0	0	0	0	0	0
ENSMODT00000003638.4	ENSMODG00000002923		0.416568	0.164862	0.216748	0	0	0	0.221774	0	0	0.271991	0.488747	0.541141
ENSMODT00000003641.4	ENSMODG00000002925	SDR39U1	19.8766	23.2611	9.25704	8.91889	7.03256	9.38737	9.50839	18.8116	29.8485	20.0587	29.1468	32.6088
ENSMODT00000003642.4	ENSMODG00000002926		95.6308	86.7693	34.888	31.0876	26.2771	43.5692	48.2091	41.5829	38.7604	41.6154	74.3456	62.2982
ENSMODT00000003643.4	ENSMODG00000002927	OTULINL	13.1085	10.7988	1.25267	1.12423	1.88513	8.30628	3.3241	7.90534	9.36551	9.57861	33.8647	31.6472
ENSMODT00000003644.4	ENSMODG00000002928		0	0	0	0	0	0	0	0	0.299894	0.127369	0	0.128017
ENSMODT00000003645.3	ENSMODG00000002929	TRAFD1	18.1387	16.4841	11.0002	7.10739	13.9171	13.55	17.4176	13.7841	19.5847	21.7444	18.9226	24.7259
ENSMODT00000003647.4	ENSMODG00000002930	FRMPD1	0.255326	0.226001	3.63273	2.56217	0.272319	1.9321	0.120525	3.41623	2.0928	5.22277	1.17705	1.34303
ENSMODT00000003648.3	ENSMODG00000002933		8.2732	3.36849	0	0	0	0.160669	0.305944	0.217143	0.985967	1.05169	5.82238	6.10721
ENSMODT00000003650.4	ENSMODG00000002932	TBC1D14	0	0	0	0	8.7161	0	0	8.01901	9.14939	8.54295	5.60536	9.52128
ENSMODT00000003652.4	ENSMODG00000002935	CCDC138	5.017	8.07763	2.25428	2.69489	0.414129	1.2357	0.64392	2.03116	3.7687	2.19883	14.6864	12.3808
ENSMODT00000003654.4	ENSMODG00000002937		6.44437	7.30961	3.1503	2.42575	1.82174	2.17085	2.15961	3.02732	5.85084	4.97746	8.77117	6.38001
ENSMODT00000003656.4	ENSMODG00000002941	OTULIN	45.1007	45.4969	32.3952	19.1018	28.3554	38.7546	34.8885	58.3816	62.1303	74.9764	57.1182	50.98
ENSMODT00000003657.4	ENSMODG00000002938		29.8667	28.5581	32.5534	5.91596	23.3642	14.1143	6.96948	61.1112	75.4397	73.3852	61.5663	54.9581
ENSMODT00000003661.4	ENSMODG00000002945	PPP2R5A	0.12904	0	0.13107	0	0	0	0	0	0	0	0	0
ENSMODT00000003662.4	ENSMODG00000002946	RNPC3	2.19778	2.43363	2.3564	0.451475	4.2841	5.81329	2.96093	7.26192	11.926	10.3823	20.6392	12.7427
ENSMODT00000003663.5	ENSMODG00000002944	CLSTN1	75.5946	64.2259	35.5904	23.7674	145.538	366.013	219.676	406.357	283.962	474.029	58.8803	74.6416
ENSMODT00000003665.3	ENSMODG00000002949	B4GALT2	47.8353	43.6839	16.9469	15.5799	41.6331	31.821	37.353	17.141	22.534	25.9878	19.2495	27.5318
ENSMODT00000003668.3	ENSMODG00000002951		10.7836	10.9991	6.07652	7.57332	7.475	5.68184	6.35976	11.449	16.142	8.67307	11.5293	22.238
ENSMODT00000003669.4	ENSMODG00000002952		22.5455	26.0483	17.3306	25.8758	4.76426	17.9188	16.574	15.0489	24.845	30.2027	25.2123	26.7962
ENSMODT00000003671.3	ENSMODG00000002957		0	0.106438	0	0	0	0	0	0	0	0	0.223816	0
ENSMODT00000003672.4	ENSMODG00000002954	SYNPR	0	0	0	0	0	0	0	0	0	0	0	0
ENSMODT00000003673.2	ENSMODG00000002955		36.0306	31.4811	31.8554	23.4048	10.0784	45.7527	33.1175	40.2818	49.0372	54.2331	48.0913	43.2012
ENSMODT00000003676.4	ENSMODG00000002958	TDP1	12.6495	13.5082	6.65343	5.68222	3.46598	7.77771	3.8207	11.1557	16.5555	14.1882	14.0257	14.8306
ENSMODT00000003678.4	ENSMODG00000002959	EDAR	6.68128	7.9012	0.932094	0.297189	0	0.161609	0.0820144	0.214266	0.243908	0	3.35827	3.08747
ENSMODT00000003680.3	ENSMODG00000002963	EFCAB11	15.2995	19.0616	5.37762	5.34246	1.82307	7.95677	14.0291	9.32617	8.29855	16.7771	12.674	14.7924
ENSMODT00000003681.2	ENSMODG00000002962	CBLN3	4.48249	0.819053	1.28502	1.36406	3.47747	2.13193	0.912445	1.43654	2.00493	1.21136	0.689336	0.706193
ENSMODT00000003682.3	ENSMODG00000002961	GCGR	2.71799	1.98191	0.619258	0.131453	2.00566	4.47722	1.75547	4.59915	4.40938	2.7748	2.91439	3.03442
ENSMODT00000003684.4	ENSMODG00000002966	HNF1A	0.057246	0.0325649	7.5968	2.02007	2.00881	3.76623	1.1135	3.33625	4.82618	4.0788	0.290044	0.449441
ENSMODT00000003685.4	ENSMODG00000002967	ANKDD1B	0.345749	1.42061	0.285773	0.124942	0.741626	1.71726	0.948669	4.08732	2.24138	3.46661	5.70593	8.61993
ENSMODT00000003687.2	ENSMODG00000002968		0	0	0	0	0	0	0	0	0	0	0	0
ENSMODT00000003689.4	ENSMODG00000002970	ANKH	27.2965	22.7086	0.63683	0.859246	5.36732	93.4615	17.2877	180.971	108.426	177.257	15.3955	16.7075
ENSMODT00000003690.4	ENSMODG00000002972		33.5653	27.8689	12.1909	1.58108	21.7363	10.9806	8.57275	28.0023	39.5763	23.118	34.7792	62.6983
ENSMODT00000003692.3	ENSMODG00000002974		6.98031	11.1949	92.495	87.6084	292.368	0	25.0756	131.802	117.701	118.778	20.496	30.1448
ENSMODT00000003694.3	ENSMODG00000002976	PACC1	2.83815	2.65053	11.837	9.40657	1.31517	6.19437	2.4297	8.14403	7.5649	5.93559	4.65273	7.84171
ENSMODT00000003695.4	ENSMODG00000002977	NECAB3	2.27306	4.02472	1.00874	0.163254	0	0.0175212	0	0	0.072946	0.0300867	1.9443	2.42044
ENSMODT00000003696.4	ENSMODG00000002978	EXOSC3	33.8499	38.845	62.23	74.8688	36.6951	39.8528	39.958	47.6463	45.172	52.9179	33.0128	44.0816
ENSMODT00000003701.4	ENSMODG00000002980	ATP1B1	114.282	93.3232	23.9818	12.575	69.9212	120.4	35.6019	170.108	326.834	645.841	206.675	197.269
ENSMODT00000003704.4	ENSMODG00000002982	NENF	128.656	112.938	45.4406	61.8862	12.2914	34.2189	18.9804	48.7561	70.2152	53.5139	83.5156	84.4815
ENSMODT00000003706.4	ENSMODG00000002983	SPPL3	0	0	2.37788	1.36854	2.50624	0	0	0	0.765062	0.439559	0	0
ENSMODT00000003708.4	ENSMODG00000002981	NEK1	18.8462	18.347	3.46385	0.115289	1.15254	5.72941	1.296	8.46373	16.1344	17.5301	47.5181	48.6061
ENSMODT00000003709.3	ENSMODG00000002986	EHBP1	13.3652	14.3702	11.2854	7.01929	1.89975	3.02551	2.60286	3.96912	6.77494	5.85842	18.7887	11.1651
ENSMODT00000003710.4	ENSMODG00000002987	DPH2	7.66433	6.82746	5.99916	3.71937	4.88262	2.88598	3.25954	6.00151	9.74126	6.37038	10.2544	12.1818
ENSMODT00000003713.3	ENSMODG00000002988		0	0	0	0.0672443	0	0	0	0	0	0	0.0534642	0.237802
ENSMODT00000003715.4	ENSMODG00000002989	C3orf49	1.3625	1.15388	0.94921	0.390107	0	0.703265	0.837259	2.338	2.41681	2.40233	2.66406	3.58658
ENSMODT00000003716.3	ENSMODG00000002991		1.02417	1.61468	0.442728	0.364018	1.39011	2.02703	1.40782	6.39222	4.63488	2.86109	4.45573	6.77481
ENSMODT00000003718.3	ENSMODG00000002992	NFATC4	15.4861	14.131	1.88796	1.80737	4.70407	5.51742	4.22933	4.84956	4.57998	6.4572	10.0506	11.5959
ENSMODT00000003719.3	ENSMODG00000002993		0	0	0	0	0	0	0	0	0	0	0	0
ENSMODT00000003720.4	ENSMODG00000002994		6.94454	7.37359	5.94134	2.57623	5.94606	1.93736	3.42461	5.68079	15.0046	7.23245	26.0034	43.7655
ENSMODT00000003721.4	ENSMODG00000002996		0.293139	0.347603	0.11378	0.0583842	0.585863	0.187586	0.0628231	0	0.14153	0	0.356077	0.882704
ENSMODT00000003724.3	ENSMODG00000002997	KYNU	0.636719	0.715676	0	0	0	1.5533	0.165495	2.24993	0	0.96005	0.601857	0.921674
ENSMODT00000003726.4	ENSMODG00000002999	DCAF10	13.3913	14.9873	17.4329	8.9793	24.5965	10.4652	10.7295	15.2646	14.8601	12.6489	15.4314	20.0028
ENSMODT00000003727.3	ENSMODG00000003000		234.361	268.266	1457.1	925.742	878.235	230.869	366.074	420.041	363.508	269.8	333.648	289.804
ENSMODT00000003728.4	ENSMODG00000003001	FOXN3	8.15591	8.80468	2.84494	1.27455	2.01626	2.64858	2.66792	6.78683	3.69974	1.63499	4.70702	2.45077
ENSMODT00000003730.4	ENSMODG00000003002	NME7	46.7938	37.2833	5.60765	7.37188	9.94667	14.5017	8.7651	36.1245	50.656	83.0442	45.238	69.3864
ENSMODT00000003733.4	ENSMODG00000003005	PIK3CD	2.13789	1.61696	0.484696	0.284269	0.904399	1.65482	0.664883	1.22741	1.20601	1.4865	1.1216	4.89892
ENSMODT00000003734.3	ENSMODG00000003007		0	0	0.134857	0	0	0	0	0	0	0	0	0.143226
ENSMODT00000003736.3	ENSMODG00000003009		9.54226e-05	8.77617e-05	0	23.0914	0	2.21963	0.0717107	318.932	204.002	315.743	22.0527	28.0165
ENSMODT00000003737.3	ENSMODG00000003010	ACADS	30.9664	26.5066	8.92327	14.0585	10.9728	29.4001	36.8229	25.491	27.8434	50.8441	17.9867	19.9962
ENSMODT00000003738.4	ENSMODG00000003012	AFAP1	6.19462	4.60182	3.04217	0.32049	3.88626	6.5062	1.61556	14.6643	14.2431	12.7122	26.7725	20.6677
ENSMODT00000003742.4	ENSMODG00000003015	BLZF1	0	0.161013	0.353951	0	1.62352	0.757328	0.607125	1.62724	0.899522	0.691898	0.423517	0.798869
ENSMODT00000003743.3	ENSMODG00000003014	ARHGDIA	46.0864	44.6635	42.5912	68.9652	250.361	72.4785	89.2105	247.071	243.749	261.07	234.328	192.47
ENSMODT00000003744.4	ENSMODG00000003016	ARHGAP15	2.4555	1.77115	0.454342	0.258968	0.342747	0.492035	0.353169	0.711164	1.1807	2.31934	4.20443	4.49329
ENSMODT00000003746.3	ENSMODG00000003017	IPO13	64.3222	73.3755	69.6188	37.8616	85.5233	45.7996	48.7911	52.5733	56.5419	56.6365	65.4599	65.808
ENSMODT00000003748.3	ENSMODG00000003021	UNC119B	42.895	45.3611	20.4242	6.18098	17.8981	21.2122	13.1296	30.3984	43.5597	34.4546	33.2032	52.3057
ENSMODT00000003751.4	ENSMODG00000003022	HECTD4	3.91552	3.73296	2.38615	0.312575	4.20683	1.74196	1.36404	4.52363	7.09562	4.88492	6.46202	13.4467
ENSMODT00000003752.4	ENSMODG00000003024	CLCN3	0	0	0.276034	0	0	0	0	0.601485	1.56318	0.468551	1.7597	4.41614
ENSMODT00000003753.4	ENSMODG00000003023	CBFA2T2	16.673	20.5529	16.9929	0	5.52373	2.61156	2.34564	5.92248	8.7646	7.24412	21.3423	20.9006
ENSMODT00000003758.3	ENSMODG00000003027		7.48325	8.28788	2.73404	1.07309	5.26828	2.57989	3.92822	7.70497	14.014	8.53197	19.8517	19.2424
ENSMODT00000003759.4	ENSMODG00000003028	IGFBPL1	0.125354	0.11381	2.07961	0.968494	10.189	2.87521	3.30715	3.59335	5.06801	3.28363	0.776264	0.123694
ENSMODT00000003761.4	ENSMODG00000003030	ALYREF	132.733	154.726	142.535	149.967	68.5439	82.8468	85.4633	69.8888	73.5584	70.3975	105.117	95.8708
ENSMODT00000003762.4	ENSMODG00000003031		0.801093	0.567469	0.24978	0	0.412935	0.0257992	0.222218	0.974959	2.68666	1.24149	3.81696	4.20437
ENSMODT00000003763.4	ENSMODG00000028042		1.86831	1.56884	6.05678	6.1911	2.90016	1.94103	3.38229	1.22662	0.917748	1.32799	0.586984	1.48032
ENSMODT00000003769.4	ENSMODG00000003033	ADCY4	1.41711	1.09641	0.000118413	0.606502	0.0922576	2.51622	1.0484	3.32236	2.53861	2.34754	1.92274	2.20153
ENSMODT00000003772.4	ENSMODG00000003037	HPF1	20.3135	1.23375	0.239008	0.00703991	57.0671	8.38748	24.6065	145.945	182.371	123.433	237.389	293.328
ENSMODT00000003773.4	ENSMODG00000003026	MYBPC1	0	0	0	0	0	0	0	0.0702284	0.722289	0.19961	0.054322	0
ENSMODT00000003774.3	ENSMODG00000003040	ST3GAL3	3.69126	3.82068	2.13407	2.12595	3.30925	0.901332	1.6932	1.95164	0.876536	1.36238	3.39064	3.75646
ENSMODT00000003775.2	ENSMODG00000003041	NPB	9.41329	12.531	6.17507	18.3226	47.6267	19.3727	36.6945	12.1507	12.4072	10.1783	3.19171	6.90192
ENSMODT00000003776.3	ENSMODG00000003043	LTB4R	0.210952	0.040187	0.134808	0.0408068	0	0.127968	0.164255	0	0.62672	0.842426	0	0.528458
ENSMODT00000003780.3	ENSMODG00000024736	ATF3	4.35661	2.0027	0.124614	0.193493	8.669	4.99235	1.95541	3.70408	9.72915	12.1078	6.99069	10.6686
ENSMODT00000003781.3	ENSMODG00000003044	SPIC	0.511365	0	0.242537	0.50424	0	0.536563	1.71861	2.24682	3.34419	10.7913	0.175731	0.0985883
ENSMODT00000003783.4	ENSMODG00000003046	MFAP3L	0.754821	1.16526	5.35511	2.96722	66.1385	35.4534	24.7584	76.5103	64.4282	47.6791	2.27	2.53196
ENSMODT00000003784.3	ENSMODG00000003047	LTB4R2	0.678733	0.482247	0.0842187	0	0.192595	0.716564	0.257051	0.531958	0.530243	2.72675	0.170803	0.314995
ENSMODT00000003785.3	ENSMODG00000003049	WDPCP	11.2967	8.99241	8.29344	3.14186	36.5409	128.575	81.6883	438.87	57.8478	16.3536	12.5893	18.3182
ENSMODT00000003786.3	ENSMODG00000050973	VN2R514	0.196453	0.020426	0.0672197	0	0	0.0419411	0.0533905	0.19097	0.230733	0.0828034	0.170686	0.563732
ENSMODT00000003787.4	ENSMODG00000003050	SNTA1	4.38151	6.48125	1.46384	1.17297	0.137688	0.215976	0.413171	0.185816	0.158931	0.129693	7.32821	3.72415
ENSMODT00000003788.4	ENSMODG00000003051		0	0	0	0	0	0.286008	0	0.387934	0	0	1.84736	0.365742
ENSMODT00000003792.4	ENSMODG00000003053		0.451286	0.22117	176.788	84.4609	1157.96	26.087	444.342	117.188	151.746	47.4082	3.43431	4.448
ENSMODT00000003796.4	ENSMODG00000003052	CCDC181	38.635	18.3807	3.639	4.83524	2.47497	6.46171	3.08486	15.8522	12.8383	11.7948	50.1733	72.4355
ENSMODT00000003797.4	ENSMODG00000003056	ARL1	122.864	130.568	372.262	338.91	188.155	196.166	209.989	225.075	207.13	224.062	141.628	127.54
ENSMODT00000003801.3	ENSMODG00000003059		10.2085	11.4843	23.9305	30.1647	416.385	125.468	237.296	179.341	177.294	92.3477	23.0754	19.1469
ENSMODT00000003803.4	ENSMODG00000003060	TTC8	11.8269	10.6831	3.29653	3.52379	2.22122	3.98255	3.05472	9.50705	10.0226	10.3118	28.8617	35.1134
ENSMODT00000003807.4	ENSMODG00000003063	PIP5K1B	4.17359	4.20555	17.2664	7.76923	11.0389	7.91355	6.07108	17.9875	9.04356	11.0957	14.2627	21.6614
ENSMODT00000003810.4	ENSMODG00000003062	ABLIM2	0	0	0	0	0	0	0	0	0	0	0	0
ENSMODT00000003812.3	ENSMODG00000003066	POP5	48.5332	45.7658	15.2017	11.5338	12.6196	18.0858	11.9178	18.1887	24.6312	16.8767	41.0758	58.0831
ENSMODT00000003813.2	ENSMODG00000003065	PCYT2	25.845	26.5364	319.99	119.346	101.157	27.182	36.0739	39.0608	36.2306	29.6087	32.4447	24.7473
ENSMODT00000003816.2	ENSMODG00000003068		0.160078	0.156032	0.355497	0	0	0.303674	0.187191	0.693113	1.96389	0.216659	1.02602	1.98048
ENSMODT00000003817.4	ENSMODG00000003069	NSL1	9.52664	13.5488	8.19776	4.68634	8.32473	9.92964	7.31747	17.2122	19.3184	17.2475	20.9329	19.1737
ENSMODT00000003825.4	ENSMODG00000003070	TOX2	2.15967	3.08026	0.97698	0.304253	0	1.40611	0.959723	2.37734	1.80747	2.89851	3.05086	5.64826
ENSMODT00000003827.4	ENSMODG00000003071	SLC19A2	1.99616	2.26009	1.88302	0.217958	3.89426	4.92194	2.54914	4.39163	4.17002	4.22842	4.41111	3.78729
ENSMODT00000003828.1	ENSMODG00000003072	NOP9	49.9152	57.7998	17.1497	17.5541	11.6526	25.5077	26.5202	31.9975	37.8647	30.3212	45.9221	54.5154
ENSMODT00000003829.2	ENSMODG00000003073	MDH1	0.388375	0.24551	0.158176	137.014	200.852	9.09009	19.5636	488.8	440.969	517.192	227.669	257.513
ENSMODT00000003830.4	ENSMODG00000003075	TATDN3	0.140454	0	0	0	0	0	0	0.180938	0.705024	0.881313	0.619523	0.680832
ENSMODT00000003831.4	ENSMODG00000003074	PSMD6	148.98	171.512	189.527	190.454	112.869	134.653	155.288	183.119	235.743	227.052	187.031	196.24
ENSMODT00000003832.4	ENSMODG00000003076	SIRT7	22.2069	18.4445	42.8877	29.55	22.7427	28.3023	33.9145	33.1824	32.3868	33.524	30.2429	33.628
ENSMODT00000003834.3	ENSMODG00000003078	SETBP1	8.43866	9.52428	1.44956	0.0549151	2.13246	1.93366	1.86793	5.09324	5.80338	6.94532	8.70497	10.1624
ENSMODT00000003836.4	ENSMODG00000036628	CDC20	4.30084	20.3523	5.40145	4.53193	5.81278	5.50936	2.60223	1.1213	1.30255	0	2.5021	8.42899
ENSMODT00000003837.3	ENSMODG00000003081	MAFG	6.19068	6.45224	3.98655	0.830575	11.0337	4.82558	5.4303	11.6919	17.3416	8.56349	9.01999	13.8154
ENSMODT00000003839.3	ENSMODG00000003082		0	0	0	0	0.375773	0.0767815	0	0.216474	0	0	0.185799	0.41131
ENSMODT00000003843.4	ENSMODG00000003084	GTDC1	0	0	0	0	0	0	0	0	0	0	0	0
ENSMODT00000003845.4	ENSMODG00000023684		1.76489	2.83147	1.11497	0.368623	1.89968	1.73297	0.747701	2.62761	3.11358	1.65002	4.20467	4.46825
ENSMODT00000003847.3	ENSMODG00000003088	DGKD	4.37343	6.73406	6.50228	0.608159	2.98094	1.84366	1.77592	5.19166	11.1523	7.01222	6.01605	15.5759
ENSMODT00000003848.4	ENSMODG00000003089	DHRS1	28.6993	32.464	8.12256	9.65716	26.1183	28.1231	26.2806	38.0565	47.3055	45.8869	51.117	44.3032
ENSMODT00000003851.4	ENSMODG00000003090	PRICKLE2	4.76194	4.53147	1.63152	0.138752	1.69976	1.18309	0	0.955385	1.12943	0.659659	2.73528	0.700158
ENSMODT00000003854.4	ENSMODG00000003092	TMEM252	0.456799	0.66184	0.116992	0.213448	0	2.73676	0.855872	1.17036	1.63433	1.75157	0.557233	0.252008
ENSMODT00000003856.4	ENSMODG00000003093	TDRD7	17.9463	15.3712	82.226	34.3127	25.966	8.97664	11.0719	27.655	28.042	21.3708	32.1381	40.5406
ENSMODT00000003858.4	ENSMODG00000003096	RPL6	832.137	854.135	423.908	635.223	330.069	215.763	280.046	227.223	314.003	282.457	732.726	745.433
ENSMODT00000003860.4	ENSMODG00000003098	SH3TC1	10.0408	9.45524	1.1747	0.538232	3.18925	14.8278	6.32641	21.9375	26.7116	34.3533	9.94283	9.78833
ENSMODT00000003862.4	ENSMODG00000003099	SV2C	0.154286	0.466623	0.106329	0	0.144922	0.014293	0.0180702	0.0516607	0.146587	0	0.866992	0.322563
ENSMODT00000003864.4	ENSMODG00000003103	VASH2	0.338941	0.4379	0.160527	0.0380679	0	0.0372842	0.14233	0.0609144	0.345671	0.231714	0.988504	0.583438
ENSMODT00000003865.3	ENSMODG00000003102		10.9819	10.5603	46.7339	39.3072	2061.9	192.75	738.468	1003.56	1101.24	433.006	52.8536	63.8886
ENSMODT00000003868.4	ENSMODG00000003106	NECAP2	36.6971	37.4675	90.9226	50.4657	28.1753	25.6531	33.2355	40.6782	42.4926	36.9265	39.9352	35.8298
ENSMODT00000003870.5	ENSMODG00000003107	SRSF6	0.828468	17.3113	41.6391	32.4409	40.3184	15.3002	3.44272	127.272	210.384	131.677	236.999	334.714
ENSMODT00000003875.3	ENSMODG00000003105		99.3377	110.827	74.2578	68.9944	41.2827	73.1084	68.7783	78.8058	59.0238	60.5433	67.463	76.0269
ENSMODT00000003876.4	ENSMODG00000003104		45.7474	48.8322	66.1321	39.0338	8.17621	38.5107	25.6719	107.553	131.448	101.193	97.6755	95.5668
ENSMODT00000003878.3	ENSMODG00000003112	ZEB2	10.3508	11.0911	2.8658	0	1.32713	1.17939	0.962731	7.21982	5.98379	6.90346	29.2324	24.0141
ENSMODT00000003879.4	ENSMODG00000003111	RNF10	94.4769	99.4329	160.251	65.9906	236.402	199.903	153.204	203.91	152.295	179.538	54.8846	101.606
ENSMODT00000003880.3	ENSMODG00000003105		0.572188	0.405687	0	0.121936	2.60409	0.244809	1.16677	0.335393	2.09695	1.46603	2.1252	2.69737
ENSMODT00000003883.4	ENSMODG00000037928		0.334378	1.65537	0.794414	0	0	0.143357	0	1.88344	2.01665	3.24979	8.65889	8.65324
ENSMODT00000003885.5	ENSMODG00000003118	RABGGTA	2.41437	2.45156	1.36067	1.32927	11.9383	1.67214	4.81208	2.90863	3.73298	3.65584	1.41044	3.53882
ENSMODT00000003886.5	ENSMODG00000003135	ABCC5	10.1151	8.96215	2.24054	1.94075	3.65056	7.36765	8.43695	11.4073	27.5366	12.7341	14.0422	30.3138
ENSMODT00000003887.4	ENSMODG00000003119	PFKL	0	0.557767	0	0	4.33542e-09	0	1.17337e-09	0.101571	0	5.59293e-06	5.31114e-09	1.9479
ENSMODT00000003888.4	ENSMODG00000003120	PTPN11	32.7128	34.9027	42.5234	11.467	43.1283	23.0541	16	54.2111	58.623	47.4324	63.2925	74.161
ENSMODT00000003891.3	ENSMODG00000003122		0	0	0	0	0	0	0	0	0	0	0	0
ENSMODT00000003893.3	ENSMODG00000003124	COQ5	22.5411	22.9202	32.6096	26.9746	32.9944	18.8063	24.8611	47.5507	54.8103	50.2115	54.4703	62.9562
ENSMODT00000003896.4	ENSMODG00000003126	F5	0.367224	0	0	0	0.00380314	2.29184	0	4.07667	0.651137	4.73602	10.2146	13.8165
ENSMODT00000003898.4	ENSMODG00000003127		9.0674	8.43749	29.8099	9.83204	16.9421	18.069	13.6334	48.0309	31.0775	38.631	19.3351	25.814
ENSMODT00000003900.3	ENSMODG00000003130	MYADML2	6.11517	6.11246	4.06385	2.01494	0.673993	3.19178	4.02701	5.08673	6.02846	3.33197	4.33614	6.1643
ENSMODT00000003901.2	ENSMODG00000003133		792.069	698.49	191.57	257.872	977.124	912.127	955.07	576.098	569.192	532.434	361.944	601.973
ENSMODT00000003902.3	ENSMODG00000003134		0	0.0586514	0	0	0	0.0441482	0.03772	0.0269005	0.0915476	0.0504884	0.0532337	0.355537
ENSMODT00000003903.4	ENSMODG00000003131	PGM5	41.2995	52.144	12.9842	8.26368	5.36905	26.2076	49.2056	32.196	28.7477	14.811	86.0443	52.083
ENSMODT00000003904.4	ENSMODG00000003136		95.0191	72.3426	107.031	98.6039	303.423	431.39	397.228	506.44	551.647	434.876	57.5527	43.6774
ENSMODT00000003907.3	ENSMODG00000003137		0	0	0	0	0	0	0	0	0	0	0	0
ENSMODT00000003908.3	ENSMODG00000003138		0.0736453	0.0734441	0.163967	0	0	0	0	0	0.200757	0.167986	0	0.169892
ENSMODT00000003909.3	ENSMODG00000003139		0	0	0	0	0	0	0	0	0	0	0	0
ENSMODT00000003910.4	ENSMODG00000003140	ADAMTS9	7.17758	10.1423	15.7286	3.62862	30.1782	19.8998	13.2784	35.4916	17.8501	23.1605	14.1793	15.6178
ENSMODT00000003912.5	ENSMODG00000003141	UTP20	7.78943	8.69273	3.53397	1.29993	6.87865	3.26693	1.87242	5.26694	8.59339	5.89373	16.3014	13.8005
ENSMODT00000003917.3	ENSMODG00000003146	SRSF9	95.651	99.5383	128.939	106.751	87.8568	91.5403	88.4424	71.4401	75.2946	73.6173	69.7724	56.5575
ENSMODT00000003918.4	ENSMODG00000003145	ANGEL2	7.68071	6.75234	5.86856	1.15583	7.14988	3.17484	5.0827	9.90352	14.9593	7.42572	20.9314	27.6718
ENSMODT00000003920.3	ENSMODG00000003147	NOTUM	12.0809	14.0194	2.7018	1.26437	0.507344	0.714726	0.670617	0.88988	1.34227	1.2426	4.901	5.16093
ENSMODT00000003921.2	ENSMODG00000003148	SNTB2	5.45765	6.33471	6.17795	0.874084	6.32546	11.1005	4.02255	16.0911	10.3405	13.1323	6.94857	10.1133
[truncated: 35,425 more rows]
