# Supplementary material for: Evolutionary transcriptomics implicates HAND2 in the origins of implantation and regulation of gestation length
Source: eLife. 2021 Feb 1;10:e61257. doi: 10.7554/eLife.61257 (PMC7943190; doi:10.7554/eLife.61257)
Supplement: Figure 3—source data 1. — RNA-Seq reads were mapped to hg38 using HISAT2, transcripts were assembled and quantified using StringTie, and DE genes were identified using DESeq2. The reference file for StringTie guided assembly was wgEncodeGencodeBasicV33. Columns indicate: Ensembl stable transcript IDs (A), HUGO gene names (B), Base mean expression level (C), Log2 fold change upon HAND2 knockdown (D), Standard Error of Log2 fold change (E), Walds-Statistic for differential expression (F), p-value of the Walds-Statitic (G), and Benjamini-Hochberg corrected p-values (H). [file elife-61257-fig3-data1.xlsx]

## Sheet: Figure 3—source data 1
Figure 3—source data 1. Genes differentially expressed (DE) upon HAND2 knockdown. RNA-Seq reads were mapped to hg38 using HISAT2, transcripts were assembled and quantified using StringTie, and DE genes were identified using DESeq2. The reference file for StringTie guided assembly was wgEncodeGencodeBasicV33. Columns indicate: Ensembl stable transcript IDs (A), HUGO gene names (B), Base mean expre…
Transcript stable ID	Gene Name	Base mean	log2(FC)	StdErr	Wald-Stats	P-value	P-adj
ENST00000339556.8	S100A13	923.469	-9.86153	0.639194	-15.4281	1.05994e-53	2.58074e-49
ENST00000379056.5	TPT1	5530.92	-14.5629	1.12768	-12.914	3.75114e-38	4.56663e-34
ENST00000217901.10	IDH3G	119.195	-3.5747	0.281335	-12.7062	5.46342e-37	4.43411e-33
ENST00000275364.8	GNA12	1174.77	-0.944803	0.0758798	-12.4513	1.37583e-35	8.37468e-32
ENST00000396779.7	TIMM17B	166.893	-4.77727	0.388918	-12.2835	1.11104e-34	5.41032e-31
ENST00000409115.7	PTMA	187.61	-8.23606	0.755789	-10.8973	1.1873e-27	4.81805e-24
ENST00000395813.5	CAST	666.958	-10.9367	1.00769	-10.8532	1.92532e-27	6.39369e-24
ENST00000549385.5	TMBIM6	1918.81	-12.9926	1.19908	-10.8355	2.33773e-27	6.39369e-24
ENST00000392623.5	S100A13	877.908	12.1363	1.12016	10.8345	2.36336e-27	6.39369e-24
ENST00000595618.5	MYO9B	482.77	11.4018	1.09153	10.4457	1.53269e-25	3.73179e-22
ENST00000414542.6	BLCAP	385.33	10.2444	0.992479	10.3221	5.6014e-25	1.23985e-21
ENST00000307114.11	GTPBP2	400.239	11.1482	1.0937	10.1931	2.12813e-24	4.31798e-21
ENST00000397274.6	MYO9B	437.724	-11.2416	1.11268	-10.1032	5.34841e-24	1.00172e-20
ENST00000394180.6	CLDND1	394.954	11.0971	1.11115	9.98705	1.73678e-23	3.0205e-20
ENST00000355238.10	SYNCRIP	672.458	11.6728	1.17242	9.95615	2.37071e-23	3.84814e-20
ENST00000379454.9	ASPH	6430.49	-0.618681	0.062376	-9.91858	3.4564e-23	5.25978e-20
ENST00000621674.4	RPL13A	420.508	-11.1524	1.13092	-9.86129	6.12572e-23	8.77347e-20
ENST00000503004.5	CLDND1	319.885	-10.8368	1.10707	-9.78864	1.25977e-22	1.70404e-19
ENST00000307126.10	GTPBP2	299.817	-10.7267	1.11995	-9.57783	9.9109e-22	1.27006e-18
ENST00000376582.7	TIMM17B	199.241	3.14982	0.335637	9.38461	6.31502e-21	7.68791e-18
ENST00000396713.6	ZDHHC4	230.573	-10.3855	1.11644	-9.30229	1.37448e-20	1.59361e-17
ENST00000535420.5	ZBTB7B	203.679	10.2313	1.10484	9.26045	2.03578e-20	2.25305e-17
ENST00000253363.11	RBM39	1184.69	-6.4674	0.701695	-9.21682	3.06045e-20	3.23982e-17
ENST00000309190.9	CAST	577.263	-11.3508	1.23286	-9.20684	3.35867e-20	3.40737e-17
ENST00000398136.7	TMEM123	4840.78	0.434579	0.0476586	9.11859	7.61086e-20	7.41237e-17
ENST00000633192.1	PON2	413.192	10.9447	1.21517	9.00669	2.12374e-19	1.9888e-16
ENST00000537888.1	PEX11B	181.306	10.0545	1.11733	8.99874	2.28316e-19	2.0589e-16
ENST00000396706.2	ZDHHC4	234.628	5.7965	0.647628	8.95035	3.54344e-19	3.08127e-16
ENST00000359562.4	HAND2	136.055	-1.63012	0.184286	-8.84561	9.10277e-19	7.64256e-16
ENST00000398484.6	FGFRL1	179.804	-10.0218	1.1358	-8.82351	1.10923e-18	9.00251e-16
ENST00000419300.3	LINC00963	125.164	9.59795	1.09705	8.74889	2.15467e-18	1.69232e-15
ENST00000419761.6	MKX	483.643	-11.0464	1.26614	-8.72449	2.67379e-18	2.03442e-15
ENST00000453954.6	TCF3	77.766	6.31623	0.730642	8.64477	5.3916e-18	3.97802e-15
ENST00000344876.8	PCDH18	532.09	2.81185	0.326505	8.61195	7.18253e-18	5.14354e-15
ENST00000313667.8	ARHGEF2	144.744	9.73169	1.13163	8.59969	7.99307e-18	5.56044e-15
ENST00000361162.10	RBM39	1362.56	4.42148	0.523253	8.44998	2.91345e-17	1.97046e-14
ENST00000235521.4	DENND1B	113.133	9.40904	1.13036	8.32396	8.50688e-17	5.59799e-14
ENST00000340828.7	CCNG1	3176.8	-0.884712	0.106596	-8.29971	1.04363e-16	6.68689e-14
ENST00000334241.9	ZNF555	97.9829	9.24467	1.11498	8.29134	1.11983e-16	6.99119e-14
ENST00000508922.5	MOCS2	103.901	-9.30457	1.13194	-8.22	2.03497e-16	1.23868e-13
ENST00000552699.5	TMBIM6	187.685	-9.93422	1.21272	-8.19171	2.57548e-16	1.52946e-13
ENST00000446613.6	HDAC11	77.1349	-8.93866	1.11483	-8.01793	1.07542e-15	6.23439e-13
ENST00000370187.8	BTRC	140.862	9.56918	1.20239	7.95846	1.74188e-15	9.86307e-13
ENST00000295701.9	CNOT9	109.525	-3.22284	0.406616	-7.926	2.26311e-15	1.25232e-12
ENST00000628904.2	PKP4	62.9089	-8.69178	1.09965	-7.90415	2.69775e-15	1.45966e-12
ENST00000419119.1	FIGNL1	76.5725	8.89637	1.12819	7.8855	3.13279e-15	1.6582e-12
ENST00000394785.9	SLC9B2	65.8703	8.72818	1.10902	7.87016	3.54188e-15	1.83484e-12
ENST00000394309.7	ASNS	1607.1	8.01776	1.03068	7.77913	7.30237e-15	3.70413e-12
ENST00000331552.11	SLC25A10	84.7564	-1.87102	0.242457	-7.71691	1.1918e-14	5.92202e-12
ENST00000397026.7	PPARG	76.149	-8.8637	1.15118	-7.69969	1.36396e-14	6.64194e-12
ENST00000367582.7	PHACTR2	264.237	10.141	1.31909	7.68787	1.49604e-14	7.05725e-12
ENST00000433867.5	PRKD2	50.6743	6.84462	0.890592	7.68548	1.52428e-14	7.05725e-12
ENST00000430256.3	KCTD15	97.6167	9.11915	1.1867	7.68448	1.5362e-14	7.05725e-12
ENST00000311223.9	GLUL	213.231	8.46848	1.1109	7.62311	2.47636e-14	1.11656e-11
ENST00000261868.10	EIF3J	892.685	-0.661862	0.0870346	-7.60458	2.85834e-14	1.26536e-11
ENST00000331872.10	SPRR3	281.424	-10.156	1.35203	-7.51167	5.8379e-14	2.53824e-11
ENST00000395200.5	MAPK3	45.775	-8.25218	1.11131	-7.42565	1.12223e-13	4.79371e-11
ENST00000644622.2	PPARG	47.437	8.27961	1.11714	7.41147	1.24909e-13	5.24361e-11
ENST00000368328.4	CENPW	92.6485	-8.99763	1.22296	-7.35724	1.87756e-13	7.74827e-11
ENST00000372858.8	PABPC4	707.997	-1.33549	0.182334	-7.32442	2.39938e-13	9.73668e-11
ENST00000437600.9	CUX1	61.7911	-8.54982	1.17561	-7.27265	3.52499e-13	1.40699e-10
ENST00000402673.7	SAR1B	1081.7	-0.665838	0.0916446	-7.26543	3.71841e-13	1.46026e-10
ENST00000375036.6	MXRA7	436.734	4.03476	0.556446	7.25093	4.13912e-13	1.59967e-10
ENST00000393432.8	HNRNPH1	178.82	-8.79571	1.2179	-7.22202	5.12216e-13	1.94866e-10
ENST00000367843.7	DCAF6	770.291	-3.05645	0.423358	-7.21953	5.21671e-13	1.9541e-10
ENST00000589261.5	ICAM3	47.9872	-8.25789	1.14993	-7.18123	6.90878e-13	2.54871e-10
ENST00000609116.5	PTBP2	186.31	1.78832	0.249128	7.17833	7.05706e-13	2.56456e-10
ENST00000381410.5	SNX18	1415.92	-0.727456	0.101975	-7.13367	9.77241e-13	3.4991e-10
ENST00000425331.5	ARMC10	52.1013	8.32374	1.17013	7.11353	1.13109e-12	3.99127e-10
ENST00000295757.8	HDAC11	77.4969	8.7322	1.23608	7.06441	1.61297e-12	5.61038e-10
ENST00000383194.8	DAXX	34.8408	-7.87896	1.12063	-7.03081	2.05333e-12	7.04146e-10
ENST00000371145.7	STAG2	93.3484	-8.90569	1.27837	-6.96646	3.25019e-12	1.09911e-09
ENST00000417934.6	ZBTB7B	25.7904	-4.12266	0.592801	-6.95454	3.53703e-12	1.17972e-09
ENST00000261918.9	SEMA7A	970.758	0.704937	0.102089	6.9051	5.01695e-12	1.65071e-09
ENST00000538617.5	UBC	364.952	10.158	1.4746	6.88865	5.63262e-12	1.82857e-09
ENST00000274192.7	SRD5A1	633.666	0.553247	0.0809729	6.83249	8.34507e-12	2.6735e-09
ENST00000435660.5	SLC30A6	54.1871	8.29634	1.21921	6.80468	1.01273e-11	3.20233e-09
ENST00000227638.8	PANX1	834.871	-1.00809	0.148317	-6.79686	1.06923e-11	3.33766e-09
ENST00000591539.1	ZNF555	28.0896	-7.58573	1.12691	-6.73147	1.67953e-11	5.17635e-09
ENST00000424526.5	GREB1L	28.9603	-7.60989	1.13845	-6.68441	2.31854e-11	7.05647e-09
ENST00000558984.1	BMP4	58.1026	-8.34149	1.25263	-6.65919	2.75335e-11	8.27636e-09
ENST00000513185.3	RGMB	539.015	-10.2016	1.54683	-6.59519	4.24705e-11	1.26106e-08
ENST00000335272.10	PITPNB	232.255	-9.64119	1.46351	-6.58774	4.46579e-11	1.31004e-08
ENST00000510305.5	PCDH18	24.9022	-7.41966	1.13262	-6.55089	5.71971e-11	1.6579e-08
ENST00000600729.2	MIA-RAB4B	43.6621	7.99877	1.23066	6.4996	8.05334e-11	2.30686e-08
ENST00000511115.5	PCDH18	32.7608	-7.69758	1.19087	-6.46381	1.02098e-10	2.89056e-08
ENST00000332290.3	C6orf120	863.328	-0.798427	0.123801	-6.4493	1.12369e-10	3.14479e-08
ENST00000222690.10	H2AZ2	962.414	-0.880567	0.138037	-6.37922	1.77998e-10	4.92488e-08
ENST00000631148.2	PWWP2B	24.0556	-7.34436	1.15297	-6.36995	1.89091e-10	5.17303e-08
ENST00000370184.1	PLPPR4	57.1741	-8.23657	1.30025	-6.33461	2.37937e-10	6.43698e-08
ENST00000262304.9	PKD1	1179.66	0.665705	0.105734	6.29602	3.05382e-10	8.17081e-08
ENST00000284136.10	SEMA3D	885.249	0.916636	0.145783	6.28766	3.22286e-10	8.52938e-08
ENST00000441634.5	RNF181	285.928	2.37093	0.379462	6.24812	4.1542e-10	1.0876e-07
ENST00000430254.1	TRAK2	18.2359	7.00946	1.12278	6.24294	4.29429e-10	1.11231e-07
ENST00000395471.7	PSPH	351.924	-9.70507	1.56783	-6.19013	6.01152e-10	1.53706e-07
ENST00000535414.5	EXTL2	503.497	-7.87012	1.27166	-6.18885	6.06038e-10	1.53706e-07
ENST00000264649.10	ATP6V0A1	83.7138	8.53847	1.38793	6.15196	7.65306e-10	1.921e-07
ENST00000595101.5	USE1	25.7965	5.86718	0.957826	6.12552	9.03895e-10	2.24572e-07
ENST00000251047.6	LMAN1	5901.99	0.37617	0.0615027	6.11631	9.57653e-10	2.35525e-07
ENST00000181839.10	CDK13	20.1335	7.08748	1.16144	6.10234	1.04524e-09	2.54495e-07
ENST00000338302.7	PEAR1	114.89	-1.18739	0.194671	-6.09946	1.0643e-09	2.56569e-07
ENST00000348225.7	PTN	971.257	-0.457999	0.0753948	-6.07468	1.24234e-09	2.96554e-07
ENST00000555997.1	ZFP36L1	149.279	-6.32227	1.04662	-6.04067	1.53473e-09	3.62791e-07
ENST00000602917.6	AL359881.1	19.565	7.042	1.16912	6.02335	1.70842e-09	3.99967e-07
ENST00000373789.8	RTKN2	50.637	8.01508	1.33146	6.01976	1.7467e-09	4.05036e-07
ENST00000329099.4	RFLNB	2778.01	-0.986271	0.163933	-6.01629	1.78464e-09	4.09928e-07
ENST00000541170.7	LUC7L2	14.2008	-6.68287	1.12693	-5.93018	3.02608e-09	6.85579e-07
ENST00000359031.8	GABPB1	18.3062	-6.95927	1.1737	-5.92937	3.04101e-09	6.85579e-07
ENST00000376573.9	PIP4K2A	1061.8	0.396562	0.0674258	5.88146	4.06666e-09	9.08395e-07
ENST00000355773.6	SLC17A5	826.28	0.764995	0.131728	5.8074	6.34495e-09	1.40442e-06
ENST00000650832.1	ZNF283	15.3863	-6.74448	1.16484	-5.79005	7.0365e-09	1.54347e-06
ENST00000370198.5	PTBP2	12.0097	-6.4607	1.129	-5.7225	1.0497e-08	2.28198e-06
ENST00000375310.5	CDC16	186.882	8.26234	1.44774	5.70705	1.14948e-08	2.47678e-06
ENST00000360632.7	EPHB4	11.7069	-6.42054	1.13369	-5.66339	1.48414e-08	3.16982e-06
ENST00000612262.1	AC023355.1	21.5772	-3.01094	0.53274	-5.65179	1.58784e-08	3.3618e-06
ENST00000256379.9	TTC9	92.2713	-8.42857	1.49526	-5.63685	1.73186e-08	3.63511e-06
ENST00000496856.6	ZNF639	117.177	-8.62634	1.53237	-5.6294	1.8084e-08	3.76333e-06
ENST00000265000.9	GALNT7	468.501	0.600641	0.107103	5.60808	2.04578e-08	4.22125e-06
ENST00000602389.1	RSU1	397.043	-8.0039	1.43138	-5.59176	2.24783e-08	4.59917e-06
ENST00000612130.4	UBE2F	255.626	-7.68633	1.38953	-5.53161	3.1731e-08	6.43821e-06
ENST00000359576.9	CLASP2	10.5451	-6.27801	1.13809	-5.51625	3.46315e-08	6.96865e-06
ENST00000580685.5	ARHGDIA	17.6646	6.79277	1.25387	5.41746	6.04527e-08	1.20648e-05
ENST00000522110.1	TNKS	32.0765	-1.81886	0.335838	-5.4159	6.0982e-08	1.20715e-05
ENST00000376414.5	GPR183	69.1341	1.37859	0.254996	5.40633	6.43299e-08	1.25534e-05
ENST00000369426.9	WARS2	154.151	-2.17068	0.401531	-5.406	6.44476e-08	1.25534e-05
ENST00000642646.1	TSC1	10.3638	6.23004	1.15314	5.40267	6.56579e-08	1.26876e-05
ENST00000527838.5	ZNF585B	16.5451	-6.72372	1.25033	-5.37756	7.55011e-08	1.44748e-05
ENST00000394308.8	ASNS	1380.13	-6.81312	1.26749	-5.37528	7.6462e-08	1.45445e-05
ENST00000320650.9	IL15	63.3079	7.97866	1.48601	5.36918	7.90949e-08	1.49287e-05
ENST00000527958.6	PAFAH1B2	3369.8	0.432105	0.0811919	5.32202	1.02622e-07	1.92203e-05
ENST00000472311.6	COX7A2	65.8188	7.98939	1.50227	5.31822	1.04787e-07	1.94759e-05
ENST00000266643.6	MARCHF9	20.9071	-6.93771	1.30858	-5.3017	1.14729e-07	2.11622e-05
ENST00000379245.8	FEZ2	346.896	7.02161	1.32603	5.2952	1.18886e-07	2.17642e-05
ENST00000398399.7	VGLL3	6704.25	-0.826526	0.156667	-5.2757	1.32253e-07	2.40306e-05
ENST00000636471.1	ZEB2	514.776	0.692242	0.131574	5.26123	1.43099e-07	2.58086e-05
ENST00000404704.7	WIPI2	28.4435	-7.2205	1.37379	-5.25592	1.47287e-07	2.63686e-05
ENST00000611218.1	SPATA33	9.41538	-6.09657	1.1659	-5.22907	1.70366e-07	3.0278e-05
ENST00000393913.8	EVA1A	164.623	-8.58546	1.64407	-5.22209	1.76912e-07	3.12135e-05
ENST00000543155.6	COPS7A	163.165	-3.00949	0.577542	-5.21086	1.87962e-07	3.29245e-05
ENST00000624145.3	ANKRD28	1890.89	-8.42125	1.61786	-5.20517	1.93818e-07	3.37077e-05
ENST00000424076.9	MEG3	33.7198	3.46677	0.66626	5.20333	1.95746e-07	3.38016e-05
ENST00000260508.9	KYAT3	8.60377	-5.99111	1.15349	-5.19388	2.05956e-07	3.53142e-05
ENST00000326277.5	SNX18	62.3791	6.61621	1.27592	5.18546	2.15482e-07	3.66892e-05
ENST00000651228.1	BIVM	189.657	-8.5777	1.65937	-5.16925	2.35033e-07	3.97402e-05
ENST00000264710.5	RAB10	2317.77	-0.354806	0.0687474	-5.16101	2.45624e-07	4.12445e-05
ENST00000377223.6	LZIC	815.391	-0.605047	0.117294	-5.15839	2.49085e-07	4.15393e-05
ENST00000588408.6	CNTD1	44.979	2.27069	0.44101	5.14884	2.62102e-07	4.34126e-05
ENST00000292176.2	ZBTB7B	112.213	-2.3326	0.454436	-5.13295	2.85229e-07	4.6924e-05
ENST00000559651.1	ANKRD9	10.4104	-6.17718	1.20907	-5.10902	3.23834e-07	5.25369e-05
ENST00000395006.8	TMBIM6	552.589	5.44486	1.06587	5.10836	3.24968e-07	5.25369e-05
ENST00000621876.1	KBTBD2	9.47084	-6.07564	1.18947	-5.10786	3.25821e-07	5.25369e-05
ENST00000261250.8	C12orf4	540.318	-0.48738	0.0954442	-5.10643	3.28297e-07	5.25879e-05
ENST00000340296.8	DYNC1I2	401.489	-8.67767	1.70169	-5.09943	3.40669e-07	5.42132e-05
ENST00000396253.7	HPS5	333.911	8.63761	1.69488	5.09629	3.46376e-07	5.47634e-05
ENST00000283928.10	JAZF1	565.628	-0.771125	0.151355	-5.0948	3.49116e-07	5.48405e-05
ENST00000240651.14	PYROXD1	564.182	-0.578001	0.114342	-5.05502	4.30357e-07	6.71688e-05
ENST00000655317.1	AL627171.2	160029	7.77886	1.54039	5.04993	4.4198e-07	6.85435e-05
ENST00000309246.9	TPT1	726.296	1.07014	0.212539	5.03501	4.77813e-07	7.36316e-05
ENST00000379826.4	APTX	211.546	-0.795622	0.158245	-5.0278	4.9615e-07	7.59765e-05
ENST00000409697.7	GNLY	19.9302	6.7895	1.35731	5.00217	5.66876e-07	8.62643e-05
ENST00000424970.6	SLC39A8	34.3574	-7.29119	1.46155	-4.98867	6.07964e-07	9.19423e-05
ENST00000616122.4	SYNCRIP	758.432	-2.54689	0.511329	-4.98092	6.32811e-07	9.51091e-05
ENST00000558871.1	CCDC32	9.96643	-6.09846	1.2288	-4.96293	6.94368e-07	0.000103721
ENST00000369151.8	CACUL1	995.009	-0.542829	0.109714	-4.94766	7.51091e-07	0.000111509
ENST00000633531.1	PON2	36.5882	7.31641	1.4819	4.93719	7.9257e-07	0.000116955
ENST00000344147.9	CACNB1	224.145	8.37293	1.6974	4.9328	8.10605e-07	0.000118895
ENST00000258729.8	IGF2BP3	161.389	-1.46371	0.297203	-4.92497	8.43738e-07	0.000123014
ENST00000567439.5	PSME3IP1	7.12204	-5.72939	1.16549	-4.91588	8.83866e-07	0.000127546
ENST00000075120.12	SLC2A3	1427.54	0.698897	0.142181	4.91556	8.85297e-07	0.000127546
ENST00000376436.5	ZNF337	98.1585	8.08286	1.64576	4.91132	9.04671e-07	0.00012957
ENST00000372586.4	DOLK	257.738	-0.924294	0.188837	-4.89467	9.84697e-07	0.000140207
ENST00000631491.1	ADAM9	1773.29	-0.532513	0.108887	-4.8905	1.00579e-06	0.000142378
ENST00000650064.2	BBS10	441.39	0.429851	0.0883413	4.8658	1.13996e-06	0.000160437
ENST00000280097.5	HNMT	363.078	0.672896	0.138532	4.85732	1.18988e-06	0.0001665
ENST00000368608.3	CREB3L4	1957.25	-0.35498	0.073247	-4.84634	1.25759e-06	0.000174971
ENST00000565666.5	CMTM3	7.11205	5.70544	1.18129	4.82982	1.36656e-06	0.000189051
ENST00000336126.6	PCGF5	1165.08	-0.34355	0.071226	-4.82338	1.41144e-06	0.000194157
ENST00000333952.8	ZNF677	14.1679	-6.39821	1.33863	-4.77967	1.75587e-06	0.000240179
ENST00000370092.7	IDH3G	108.21	4.61573	0.979042	4.71454	2.42258e-06	0.000329526
ENST00000220853.8	EMC2	509.974	0.520702	0.110801	4.69943	2.60887e-06	0.000352894
ENST00000381937.9	NADK2	617.196	0.445256	0.09478	4.69779	2.62996e-06	0.00035378
ENST00000575671.5	TRAP1	71.0396	-5.60083	1.19379	-4.69162	2.71047e-06	0.000362607
ENST00000552766.5	PA2G4	9.99238	-5.30823	1.13396	-4.68115	2.85273e-06	0.000378789
ENST00000343150.10	CTSL	1723.3	3.1473	0.672435	4.68044	2.86254e-06	0.000378789
ENST00000652337.1	MTHFD1	7.01561	-5.66368	1.212	-4.67299	2.96851e-06	0.000390688
ENST00000395601.7	SNTB1	430.837	-7.68516	1.64513	-4.67145	2.99084e-06	0.000391511
ENST00000396981.6	UBE2G1	639.524	-0.550461	0.117921	-4.66806	3.0405e-06	0.000395883
ENST00000382384.6	WIPI2	55.9967	7.49241	1.62451	4.61211	3.98598e-06	0.000516227
ENST00000315367.4	PLEKHF2	394.482	-0.508396	0.110443	-4.60326	4.15936e-06	0.000535456
ENST00000392551.6	GPR155	7.09687	5.65034	1.22772	4.6023	4.17844e-06	0.000535456
ENST00000524558.5	SERPINH1	1654.9	-6.00951	1.3088	-4.59161	4.39839e-06	0.000560691
ENST00000199814.9	RBM22	172.156	-0.921259	0.200806	-4.5878	4.47947e-06	0.000568053
ENST00000665376.1	TTC28-AS1	9.41002	5.93076	1.29357	4.58479	4.54448e-06	0.000573311
ENST00000255495.7	MORC4	27.9248	6.91978	1.51466	4.56855	4.91114e-06	0.000616373
ENST00000232424.4	HES1	33.1862	1.7776	0.390473	4.55244	5.30281e-06	0.000662117
ENST00000262094.10	RAB27B	319.279	1.13057	0.248492	4.54972	5.37179e-06	0.000667308
ENST00000569580.2	AC009107.2	285.079	-0.750289	0.165158	-4.54287	5.54933e-06	0.000685864
ENST00000354785.10	FN1	696.242	-5.67068	1.25268	-4.52683	5.98737e-06	0.000736265
ENST00000245451.9	BMP4	52.0809	4.84786	1.07161	4.5239	6.07117e-06	0.000742818
ENST00000342972.3	MAGEH1	603.078	0.58757	0.129913	4.52279	6.1029e-06	0.000742967
ENST00000524023.1	HDAC9	19.6646	6.58134	1.46891	4.48042	7.44971e-06	0.000902415
ENST00000344517.5	ABCB10	301.877	-0.549717	0.123073	-4.46658	7.94781e-06	0.000957987
ENST00000421182.5	FN1	561.098	-5.62158	1.26112	-4.4576	8.28817e-06	0.00099409
ENST00000623080.1	AL445363.3	211.444	-0.761417	0.171034	-4.45184	8.51374e-06	0.00101614
ENST00000347559.6	LMNA	773.24	6.96733	1.56857	4.44184	8.91941e-06	0.00105937
ENST00000282388.4	ZFP36L2	505.156	-0.836217	0.188323	-4.44034	8.98173e-06	0.00106159
ENST00000454158.7	RELL1	741.363	0.450306	0.10162	4.43128	9.36742e-06	0.00110183
ENST00000548545.1	MRPL42	278.194	0.606088	0.136946	4.42575	9.6106e-06	0.001125
ENST00000499810.6	ETF1	322.003	-4.74475	1.07382	-4.41859	9.93485e-06	0.00115739
ENST00000366607.5	TOMM20	1581.15	0.285579	0.0646937	4.41433	1.01323e-05	0.00117476
ENST00000419869.7	STRAP	2172.92	-0.285787	0.0649252	-4.40179	1.07361e-05	0.00123887
ENST00000566428.5	KIAA0513	414.813	-0.550071	0.125052	-4.39872	1.08889e-05	0.00125058
ENST00000456936.4	TMED7	4419	-0.31395	0.0714106	-4.39641	1.10056e-05	0.00125805
ENST00000530284.5	SERPINH1	407.06	6.30353	1.43843	4.38222	1.17474e-05	0.00133657
ENST00000320031.13	ITGA3	833.592	0.566395	0.129321	4.37976	1.18811e-05	0.00134549
ENST00000507845.5	UBE2D3	9.44997	-5.8762	1.34603	-4.36559	1.26778e-05	0.00142781
ENST00000545620.5	SMAD5	390.779	-7.35346	1.68473	-4.36478	1.27252e-05	0.00142781
ENST00000396265.4	TSPO	301.634	-6.24456	1.43715	-4.3451	1.39209e-05	0.0015548
ENST00000554659.6	VTI1B	1170.9	-0.419578	0.0966321	-4.34201	1.41182e-05	0.00156964
ENST00000544551.5	RDX	368.039	-6.07468	1.40272	-4.33064	1.48679e-05	0.00164547
ENST00000648616.1	C18orf54	10.1088	-5.92588	1.37074	-4.32313	1.53831e-05	0.00169478
ENST00000261845.7	MAPK6	3020.68	0.385708	0.0893078	4.31886	1.56837e-05	0.00172013
ENST00000533983.5	ARNT2	44.4674	1.1965	0.278422	4.29742	1.72798e-05	0.00188667
ENST00000374358.5	TMEM50A	1393.04	-0.438375	0.102109	-4.29322	1.761e-05	0.00191326
ENST00000422247.6	CEP135	5.29106	-5.27505	1.22895	-4.29233	1.76805e-05	0.00191326
ENST00000338728.9	TRIM2	1287	-0.445398	0.104106	-4.27832	1.88308e-05	0.00202873
ENST00000400911.7	VAMP1	5.20258	5.2438	1.23003	4.26315	2.01567e-05	0.00216201
ENST00000541377.5	CLASP1	7.988	5.67198	1.33308	4.25478	2.09253e-05	0.0022346
ENST00000367034.5	MRPL18	432.338	-0.66575	0.156676	-4.24923	2.14509e-05	0.00228073
ENST00000230461.11	TMEM30A	6538.24	-0.606042	0.142794	-4.24415	2.1942e-05	0.0023228
ENST00000305409.3	SCG2	20.4805	2.18246	0.516607	4.22461	2.39355e-05	0.00251362
ENST00000639695.1	RFC1	8.54436	-5.73138	1.35671	-4.22446	2.39511e-05	0.00251362
ENST00000547291.1	DUSP6	11.7701	6.01431	1.42883	4.20926	2.5621e-05	0.0026724
ENST00000529359.5	PLPP5	400.077	0.454031	0.107879	4.20871	2.56835e-05	0.0026724
ENST00000219204.8	ARL2BP	838.395	-1.15014	0.273967	-4.19811	2.69149e-05	0.00278862
ENST00000657683.1	LINC01184	152.684	-0.707546	0.168949	-4.18793	2.81512e-05	0.00290434
ENST00000366641.4	EGLN1	1027.12	-0.355493	0.0850024	-4.18215	2.88767e-05	0.00296662
ENST00000339413.11	YIF1B	161.309	5.61683	1.34397	4.1793	2.9241e-05	0.00299143
ENST00000322342.4	ZADH2	662.398	-0.618893	0.148135	-4.1779	2.94219e-05	0.00299734
ENST00000514483.5	POLR3G	13.8864	-6.15441	1.47383	-4.17579	2.96957e-05	0.00301136
ENST00000266880.11	CHFR	329.449	-0.500744	0.11994	-4.17494	2.98068e-05	0.00301136
ENST00000333244.6	AHNAK2	241.278	-4.66538	1.11928	-4.1682	3.07014e-05	0.00308892
ENST00000579793.6	NOTCH2NLA	6.6803	5.46408	1.31312	4.16114	3.16664e-05	0.00317289
ENST00000639913.1	KCNMA1	636.705	-0.65784	0.158258	-4.15674	3.22815e-05	0.00322127
ENST00000375464.7	CARD19	283.546	0.631575	0.152185	4.15006	3.32392e-05	0.00329352
ENST00000372715.6	WDR34	252.329	-1.3951	0.336185	-4.1498	3.32761e-05	0.00329352
ENST00000610261.6	ZNF595	29.9721	-6.75545	1.62913	-4.14667	3.3735e-05	0.00332542
ENST00000348997.9	DTNA	37.5099	3.24255	0.78562	4.12738	3.66927e-05	0.0036024
ENST00000305103.4	COMMD5	95.9532	-6.46418	1.56967	-4.11817	3.81897e-05	0.00373431
ENST00000616714.4	STIM1	261.811	-1.04523	0.254565	-4.10594	4.02678e-05	0.00391949
ENST00000279488.8	DUSP6	502.7	0.882876	0.215153	4.10348	4.06973e-05	0.00391949
ENST00000275493.7	EGFR	2019.23	-1.14231	0.278386	-4.10334	4.07227e-05	0.00391949
ENST00000367419.10	GINM1	811.688	-0.420178	0.102428	-4.10217	4.09296e-05	0.00391949
ENST00000372759.4	ZMPSTE24	2140.67	-0.194057	0.0473121	-4.10164	4.10237e-05	0.00391949
ENST00000315366.8	ARSJ	2115.84	-0.693949	0.169249	-4.10018	4.12838e-05	0.00391949
ENST00000665384.1	AC245297.3	7.4154	-3.22729	0.787192	-4.09974	4.13607e-05	0.00391949
ENST00000281127.11	NRXN3	568.228	-0.725421	0.176946	-4.09968	4.13713e-05	0.00391949
ENST00000361189.7	PJA2	1497.56	6.41242	1.56961	4.08536	4.40088e-05	0.00415321
ENST00000259241.7	HS6ST1	318.607	-0.456056	0.111667	-4.08408	4.42527e-05	0.0041601
ENST00000591497.5	PTPN2	9.71967	-5.79869	1.42182	-4.07837	4.53531e-05	0.00424715
ENST00000261455.8	PROX1	283.706	0.524638	0.128832	4.07228	4.65557e-05	0.00434306
ENST00000627622.1	CHD2	26.6301	-6.62026	1.62794	-4.06666	4.76927e-05	0.00443215
ENST00000367067.8	CD55	431.31	2.77065	0.684253	4.04916	5.14016e-05	0.00474688
ENST00000340930.7	PTK2	155.686	-7.25253	1.79126	-4.04885	5.14694e-05	0.00474688
ENST00000367858.9	SGK1	1006.19	-6.38132	1.57801	-4.0439	5.25704e-05	0.00483013
ENST00000541412.5	TMEM14C	57.5099	4.73951	1.17306	4.04029	5.33853e-05	0.00487082
ENST00000360089.8	KIRREL1	28.8474	-6.66155	1.64883	-4.04017	5.34134e-05	0.00487082
ENST00000467337.6	GOSR1	6.36185	-5.38711	1.33453	-4.03672	5.42034e-05	0.00492442
ENST00000265339.7	UBE2B	496.346	-0.510429	0.127636	-3.9991	6.3583e-05	0.00575509
ENST00000340879.8	IP6K2	35.4477	-6.77397	1.69612	-3.9938	6.50228e-05	0.00584599
ENST00000014914.5	ERCC1	357.71	-0.519114	0.129985	-3.99364	6.50675e-05	0.00584599
ENST00000519676.6	SLC25A30	394.294	-0.607342	0.152344	-3.98666	6.70099e-05	0.00597681
ENST00000559107.5	TM2D3	26.1169	-2.48085	0.622402	-3.98592	6.72179e-05	0.00597681
ENST00000343813.10	ICMT	2750.31	-0.476965	0.119667	-3.98578	6.726e-05	0.00597681
ENST00000419746.5	TTN-AS1	118.684	2.20118	0.552735	3.98235	6.82382e-05	0.00604168
ENST00000261819.8	ANAPC5	832.069	-1.97645	0.498043	-3.96843	7.23472e-05	0.00638228
ENST00000329559.8	NDUFB1	97.0112	6.65929	1.6799	3.96409	7.36759e-05	0.00647603
ENST00000358293.7	FAM217B	184.808	-0.835962	0.211305	-3.95619	7.61548e-05	0.00666984
ENST00000347034.6	CAMKK2	5.5632	-5.23152	1.32567	-3.94632	7.93632e-05	0.00692593
ENST00000655246.1	LINC02693	72.9619	6.15384	1.55997	3.94486	7.9847e-05	0.00694327
ENST00000616743.1	BASP1	54.574	-5.68668	1.4448	-3.93595	8.28667e-05	0.00716726
ENST00000504792.6	THAP9-AS1	58.275	5.13447	1.30464	3.93553	8.30116e-05	0.00716726
ENST00000620048.6	DENND1B	422.424	-0.598235	0.152268	-3.92883	8.53606e-05	0.00734403
ENST00000647612.1	AL355312.5	992.53	-0.466755	0.118904	-3.92548	8.65574e-05	0.00742077
ENST00000503771.2	TMEM158	159.097	-0.721997	0.184109	-3.92157	8.7974e-05	0.00751576
ENST00000312263.10	DCAF6	1199.58	2.77779	0.712135	3.90064	9.59374e-05	0.00816743
ENST00000488965.1	SCP2	324.084	4.95038	1.27048	3.89647	9.7604e-05	0.00828036
ENST00000263574.9	APLP2	8.51387	5.59953	1.43876	3.89193	9.94518e-05	0.00840782
ENST00000409501.7	UXS1	3.56864	4.76257	1.2243	3.89002	0.000100235	0.00844469
ENST00000314028.10	CSNK1D	336.809	-0.455842	0.11746	-3.88083	0.000104099	0.00874001
ENST00000507142.5	PDE4D	21.3901	-3.08912	0.796309	-3.87929	0.00010476	0.00876529
ENST00000272793.10	UBR3	1416.72	-0.515817	0.133704	-3.8579	0.000114367	0.00952503
ENST00000526691.5	TXNRD1	10186.1	0.327327	0.084858	3.85735	0.000114623	0.00952503
ENST00000419445.6	PGGT1B	596.204	-0.673391	0.174882	-3.85053	0.000117861	0.00976078
ENST00000298573.9	DUSP16	200.391	-0.663932	0.172611	-3.84641	0.000119863	0.009893
ENST00000358689.9	ENTPD4	834.763	-0.651859	0.169687	-3.84153	0.000122269	0.0100574
ENST00000463407.5	NUP58	648.632	0.527265	0.137288	3.84058	0.000122745	0.0100626
ENST00000263997.11	SLC7A6OS	91.826	-0.880412	0.229328	-3.8391	0.000123486	0.0100894
ENST00000355610.9	MORC4	399.234	-0.762168	0.198801	-3.83381	0.000126172	0.0102744
ENST00000445930.7	PSMC6	497.067	-3.98261	1.04129	-3.82469	0.000130938	0.0106045
ENST00000396200.3	PDP1	90.4932	-6.19382	1.61981	-3.82379	0.000131416	0.0106045
ENST00000622668.4	HDAC9	139.434	-3.11859	0.815623	-3.82357	0.000131533	0.0106045
ENST00000262067.5	TSPAN13	112.773	0.759304	0.198749	3.82041	0.000133228	0.0107058
ENST00000368786.5	UROS	478.376	-0.461225	0.121192	-3.80573	0.000141386	0.0113239
ENST00000334464.7	PDZD8	1169.36	-0.615066	0.161783	-3.8018	0.000143651	0.0114676
ENST00000509061.5	LARP7	224.715	-6.94047	1.82715	-3.79852	0.000145562	0.0115822
ENST00000392807.8	ISCU	282.819	-6.08914	1.60516	-3.79348	0.000148548	0.0117813
ENST00000356239.7	CDAN1	1847.78	0.515442	0.136146	3.78596	0.000153117	0.0121042
ENST00000296861.2	TNFRSF21	45.6127	1.17085	0.309865	3.77857	0.000157732	0.0123955
ENST00000452655.6	RBBP6	8.15697	5.51616	1.45991	3.77843	0.00015782	0.0123955
ENST00000264065.12	DNAJC10	4818.64	0.354057	0.0937725	3.77571	0.000159555	0.0124915
ENST00000500949.6	OIP5-AS1	1377.52	-0.941235	0.249464	-3.77302	0.000161282	0.0125862
ENST00000607297.1	ARF4-AS1	3.97833	-4.84035	1.29147	-3.74794	0.000178295	0.0138659
ENST00000325954.9	RNF10	1160.27	-0.499054	0.133181	-3.7472	0.00017882	0.0138659
ENST00000304060.10	ZNF440	177.823	-0.592646	0.158281	-3.74426	0.000180927	0.0139848
ENST00000369442.3	GDAP2	6.85158	-5.35017	1.43346	-3.73235	0.000189705	0.0146169
ENST00000341698.2	TMEM189-UBE2V1	426.467	-0.548135	0.146918	-3.7309	0.000190799	0.0146548
ENST00000316626.5	GSK3B	69.2328	-5.53313	1.48479	-3.72653	0.000194136	0.0148642
ENST00000338134.8	KPTN	30.5781	-1.39639	0.375123	-3.72248	0.000197279	0.0150575
ENST00000464962.6	QARS1	512.944	6.42624	1.72796	3.71897	0.000200037	0.0152203
ENST00000262844.10	AMMECR1	824.494	0.433262	0.116659	3.71393	0.000204065	0.0154784
ENST00000616291.1	AC004386.5	3.7064	4.75488	1.28187	3.70932	0.000207815	0.0156486
ENST00000306368.9	RNF181	441.645	-2.0306	0.547612	-3.70809	0.00020883	0.0156486
ENST00000367434.5	B3GALT2	790.429	-0.479239	0.129261	-3.70752	0.000209301	0.0156486
ENST00000340342.10	CTSL	1018.31	-5.06034	1.36498	-3.70726	0.000209516	0.0156486
ENST00000518999.5	ZNF419	3.69325	4.75174	1.28174	3.70725	0.000209521	0.0156486
ENST00000246957.10	TRAP1	94.7258	1.56144	0.422534	3.69542	0.000219521	0.0163335
ENST00000394685.8	CEMIP	131.165	0.902943	0.24438	3.69483	0.000220034	0.0163335
ENST00000612191.4	BNIP2	621.12	5.88366	1.59451	3.68995	0.000224298	0.0165994
ENST00000391932.7	SNRPD2	25.0483	4.38534	1.19181	3.67956	0.000233635	0.017238
ENST00000403268.1	DUSP18	41.4128	-2.30896	0.627877	-3.67741	0.00023561	0.0173312
ENST00000272233.6	RHOB	3493.02	-0.419248	0.114234	-3.67006	0.000242492	0.0177397
ENST00000428826.7	EZH1	218.447	0.492471	0.134191	3.66993	0.00024262	0.0177397
ENST00000401424.6	ARNTL	42.5205	-2.94599	0.803428	-3.66677	0.000245633	0.0179062
ENST00000392359.8	CENPX	169.755	-0.886766	0.242077	-3.66315	0.000249129	0.0181069
ENST00000369528.9	SIKE1	1449.04	0.459441	0.125596	3.65809	0.000254098	0.018413
ENST00000357033.8	MED27	419.982	0.508348	0.139021	3.65663	0.000255555	0.0184636
ENST00000369535.5	NRAS	1500.56	-0.488343	0.134066	-3.64254	0.00026996	0.0194467
ENST00000527696.5	RIC8A	750.745	2.48448	0.682521	3.64016	0.000272473	0.0195698
ENST00000369306.8	PEX11B	193.086	-5.44772	1.49707	-3.63893	0.000273776	0.0196056
ENST00000380084.8	RBBP7	521.839	-6.23975	1.71541	-3.63748	0.00027532	0.0196583
ENST00000541777.6	ZNF83	148.118	-4.30607	1.18503	-3.63373	0.000279358	0.0198307
ENST00000557933.5	LDLR	39.055	5.96005	1.64021	3.63372	0.000279363	0.0198307
ENST00000245304.5	RAP2A	1725.69	0.207552	0.0572086	3.62799	0.000285639	0.0202173
ENST00000472837.7	GTF2IRD2B	40.3012	5.94332	1.63903	3.62612	0.000287711	0.0203049
ENST00000367208.1	SNRPE	211.251	-0.752225	0.207525	-3.62474	0.000289251	0.0203546
ENST00000274000.10	AP1AR	569.473	0.379555	0.104854	3.61984	0.000294782	0.020684
ENST00000329152.7	LZTS3	156.844	-0.625434	0.172891	-3.6175	0.000297466	0.0208123
ENST00000511355.5	NME1	72.1835	3.86335	1.06971	3.61158	0.000304338	0.0212321
ENST00000377102.5	SPRY2	229.614	0.582641	0.161538	3.60684	0.000309952	0.021562
ENST00000616033.4	MSH6	122.293	-6.17577	1.71336	-3.60448	0.000312779	0.0216967
ENST00000436636.7	TNIK	88.3116	0.954426	0.264965	3.60208	0.000315679	0.0218357
ENST00000600068.1	AC010328.3	3.09727	-4.54873	1.26857	-3.5857	0.000336177	0.0231877
ENST00000285518.11	AGPAT5	392.989	0.649558	0.181565	3.57755	0.000346832	0.0238286
ENST00000281772.14	KANSL1L	310.655	0.560783	0.15677	3.5771	0.000347428	0.0238286
ENST00000367728.1	PIGC	89.7454	-4.55149	1.27299	-3.57542	0.00034967	0.0239151
ENST00000375048.7	KIF17	90.0478	-5.04477	1.41205	-3.57266	0.000353374	0.0241007
ENST00000361339.9	IFT140	3.33526	-4.61128	1.2927	-3.56716	0.00036087	0.0245432
ENST00000604030.6	SH3D19	24.2889	-6.2118	1.7424	-3.56509	0.000363731	0.0246689
ENST00000583509.7	ACP6	9.40662	-2.96218	0.833141	-3.55544	0.000377344	0.025521
ENST00000359943.8	FAM3C	239.395	-0.659954	0.185711	-3.55366	0.000379912	0.0256235
ENST00000428670.7	ATP2B1	2381.75	-4.07264	1.14645	-3.5524	0.000381738	0.0256756
ENST00000309558.8	SUSD5	120.775	-0.527922	0.148777	-3.54842	0.000387553	0.0259272
ENST00000652534.1	APLP1	95.0205	-0.930155	0.262135	-3.54838	0.000387609	0.0259272
ENST00000586096.3	RPS15	32.55	3.80976	1.07436	3.54607	0.000391029	0.0260843
ENST00000651233.1	LINC00847	9.96077	5.56833	1.57104	3.54435	0.000393583	0.0261829
ENST00000336727.7	RGS12	2.80319	4.4192	1.24884	3.53865	0.000402184	0.0266822
ENST00000673627.1	MIR503HG	58.1983	-4.4273	1.25359	-3.53169	0.000412918	0.0272945
ENST00000658375.1	AL357075.3	2.64575	-4.36861	1.23734	-3.53064	0.00041456	0.0272945
ENST00000375731.8	POFUT1	108.418	0.717941	0.203354	3.5305	0.000414775	0.0272945
ENST00000370777.1	MOSPD1	13.2848	4.19691	1.18922	3.52911	0.000416953	0.0273638
ENST00000395002.6	FAM13A	78.6966	6.47716	1.8358	3.52824	0.000418332	0.0273805
ENST00000656911.1	LMCD1-AS1	2.98059	-4.48905	1.27271	-3.52717	0.000420028	0.0274178
ENST00000608933.6	PPM1K	794.463	0.376703	0.106886	3.52433	0.000424549	0.027594
ENST00000271469.7	UAP1	25.1767	-2.37855	0.674946	-3.52406	0.000424995	0.027594
ENST00000316292.13	EEF1A1	47889.5	0.575743	0.163426	3.52297	0.000426743	0.0276339
ENST00000521988.6	TRIQK	261.246	-2.50724	0.711862	-3.52208	0.000428167	0.0276525
ENST00000379568.4	PAK1IP1	373.647	-0.375487	0.106647	-3.52084	0.000430178	0.027709
ENST00000586566.2	PIGN	6.86881	5.2533	1.49286	3.51895	0.000433262	0.0278076
ENST00000607635.2	POLR1C	44.7543	-5.07332	1.4419	-3.5185	0.000433994	0.0278076
ENST00000340344.4	NDUFV3	143.802	-0.859096	0.244437	-3.51459	0.00044043	0.0281459
ENST00000312419.8	POLD4	132.781	-2.14829	0.611742	-3.51176	0.000445144	0.0283163
ENST00000409098.5	EIF4E2	116.803	6.48652	1.84717	3.5116	0.000445423	0.0283163
ENST00000367662.5	PAPPA2	356.27	0.566567	0.162162	3.49383	0.000476151	0.0301909
ENST00000421812.3	ZNF697	370.159	0.406436	0.1164	3.49172	0.000479926	0.0303513
ENST00000394030.8	CBLB	545.343	0.562322	0.161082	3.4909	0.000481397	0.0303654
ENST00000367162.8	DSTYK	293.064	-4.13425	1.1854	-3.48764	0.000487312	0.0306591
ENST00000455274.5	TTLL3	2.63718	-4.35475	1.24994	-3.48398	0.000494018	0.0310009
ENST00000280612.9	SLC7A11	6143.94	-0.284886	0.0818395	-3.48103	0.000499494	0.031264
ENST00000378090.9	C12orf73	33.8864	4.04143	1.16141	3.47975	0.00050188	0.0312762
ENST00000629723.2	EIF1B-AS1	2.77416	-4.4086	1.267	-3.47955	0.000502258	0.0312762
ENST00000376753.9	FBXO6	52.1326	-1.27896	0.367645	-3.47878	0.000503693	0.0312855
ENST00000297689.4	NFIL3	380.449	0.477843	0.137861	3.46612	0.000528018	0.0326579
ENST00000423023.2	PSPC1-AS2	2.81227	4.40246	1.27033	3.46561	0.000529025	0.0326579
ENST00000305626.6	RAB33B	448.655	0.34057	0.0982995	3.46461	0.000530995	0.0326579
ENST00000205636.4	CMTM6	3833.8	0.233293	0.0673375	3.46453	0.000531154	0.0326579
ENST00000395468.9	MAPK1IP1L	854.128	-0.561074	0.162084	-3.46163	0.000536911	0.0329287
ENST00000572006.1	FLYWCH2	22.5167	-6.08185	1.75769	-3.46014	0.000539885	0.033028
ENST00000312584.4	TNFRSF10D	3405.87	0.506046	0.146305	3.45885	0.00054249	0.0331041
ENST00000376747.8	UGGT2	1537.37	0.430606	0.124639	3.45481	0.00055068	0.0335199
ENST00000322244.10	UBA6	2484.51	0.231018	0.0669091	3.45271	0.000554985	0.0336547
ENST00000375790.9	MKX	545.123	5.63154	1.6312	3.45238	0.000555659	0.0336547
ENST00000324557.8	USP9X	55.849	1.05917	0.306893	3.45125	0.000557996	0.0337123
ENST00000359314.5	CD2AP	951.707	0.455565	0.132043	3.45012	0.000560341	0.0337702
ENST00000383701.8	EOGT	233.649	-2.76863	0.802769	-3.44886	0.000562969	0.0338449
ENST00000238651.9	ACOT2	109.041	-3.74976	1.08891	-3.4436	0.000574017	0.0343136
ENST00000397166.7	DDHD2	434.887	-0.412794	0.119886	-3.44322	0.000574821	0.0343136
ENST00000299855.10	MMP3	89.1779	0.816093	0.23702	3.44314	0.000574995	0.0343136
ENST00000409140.8	SPATS2L	356.654	-5.07722	1.47511	-3.44193	0.000577586	0.034384
ENST00000590842.5	TPGS2	111.064	-1.03529	0.301261	-3.43653	0.000589206	0.0349302
ENST00000319172.10	TMEM39A	770.348	0.315821	0.0919063	3.43634	0.000589631	0.0349302
ENST00000263100.8	A1BG	57.3018	-1.64743	0.479554	-3.43534	0.000591816	0.0349746
ENST00000392993.7	GK5	552.076	0.487569	0.142045	3.4325	0.000598045	0.0352404
ENST00000228510.8	MVK	188.744	-0.631617	0.184046	-3.43184	0.000599504	0.0352404
ENST00000344651.5	UNC119B	761.493	-0.48591	0.14161	-3.43132	0.000600655	0.0352404
ENST00000322897.11	NAPG	823.589	0.317509	0.0926239	3.42793	0.000608194	0.0355969
ENST00000368759.5	BCCIP	71.4249	1.81891	0.53342	3.40991	0.000649847	0.0379436
ENST00000536019.5	MCU	758.106	-0.423421	0.124402	-3.40366	0.000664884	0.0387287
ENST00000611804.1	BDKRB1	78.8063	-1.88176	0.553699	-3.39852	0.000677505	0.0393697
ENST00000666110.1	AC004817.5	392.27	-0.909803	0.267891	-3.39617	0.000683358	0.0396152
ENST00000657078.1	AC009486.2	2.44386	4.24644	1.25084	3.39486	0.000686635	0.0397107
ENST00000451928.6	PDZK1	2.44589	4.24629	1.25153	3.39287	0.000691633	0.0399049
ENST00000559898.5	HDDC3	18.8409	4.52592	1.33593	3.38784	0.000704462	0.040549
ENST00000357618.9	HFE	257.753	-0.614825	0.181775	-3.38234	0.000718713	0.0412718
ENST00000269159.8	IMPA2	57.5808	-1.33662	0.395389	-3.38051	0.000723507	0.0414493
ENST00000535757.5	DBI	657.79	4.87796	1.44373	3.37871	0.000728275	0.0416245
ENST00000372086.4	TESK2	26.4048	1.44856	0.429734	3.37084	0.000749389	0.042731
ENST00000520829.5	DCTN6	2.46406	4.24444	1.26022	3.36802	0.000757096	0.0430695
ENST00000330374.6	VMA21	1536.81	-0.388583	0.115519	-3.36379	0.000768802	0.0436335
ENST00000325324.10	KLK2	675.837	-0.308776	0.0918832	-3.36052	0.000777952	0.0440502
ENST00000317135.13	LRCH2	343.215	0.504928	0.150642	3.35185	0.000802732	0.0453479
ENST00000261332.11	ZNF24	372.274	6.15794	1.83768	3.35093	0.000805407	0.0453936
ENST00000481273.5	PTK7	642.805	6.27768	1.8805	3.33831	0.000842899	0.047397
ENST00000377710.10	MGME1	280.833	-0.391842	0.117617	-3.3315	0.000863805	0.0483771
ENST00000432587.6	DCAF6	85.8424	-3.72263	1.11746	-3.33134	0.000864303	0.0483771
ENST00000430479.6	ETV1	438.124	1.20881	0.36331	3.32721	0.000877211	0.048987
ENST00000429654.7	ZNF69	90.0423	-0.701785	0.211726	-3.31459	0.000917784	0.0510015
ENST00000354336.8	CRKL	1278.85	-0.308439	0.0930818	-3.31364	0.000920912	0.0510015
ENST00000338446.8	FAIM	93.1848	-3.89399	1.17517	-3.31356	0.000921177	0.0510015
ENST00000264499.9	BBS7	730.309	0.310181	0.09363	3.31284	0.000923553	0.0510015
ENST00000372886.6	PKIG	686.253	-0.830292	0.250633	-3.31277	0.000923758	0.0510015
ENST00000256104.5	FABP4	32.0243	-1.37579	0.415656	-3.30994	0.000933176	0.0514049
ENST00000216014.9	KDELR3	2396.64	0.211731	0.0640359	3.30644	0.00094491	0.0519338
ENST00000344327.8	TRPC6	248.916	-0.519027	0.157168	-3.30237	0.000958714	0.0525528
ENST00000302754.6	JUNB	273.926	0.485769	0.14712	3.30185	0.000960489	0.0525528
ENST00000629161.1	AL161457.2	2.30108	4.15633	1.25964	3.29962	0.000968167	0.0528472
ENST00000543190.5	LTBR	15.7106	5.72894	1.73655	3.29903	0.000970212	0.0528472
ENST00000261622.5	SLC7A5	1230.77	0.405044	0.122925	3.29505	0.000984053	0.0534815
ENST00000307662.5	SYNPO	37.112	-1.41397	0.430764	-3.28248	0.00102898	0.0557989
ENST00000503570.6	ANXA3	122.077	-0.624134	0.190427	-3.27754	0.00104715	0.0566578
ENST00000579827.6	IKBKE	9.90523	-5.41072	1.65245	-3.27435	0.00105904	0.057174
ENST00000064724.7	CBLN4	1415.89	-0.740005	0.226171	-3.27189	0.00106833	0.057548
ENST00000309428.10	RETREG3	1197.58	0.241483	0.0739766	3.26432	0.00109727	0.0589763
ENST00000332624.8	TRAK2	2828.92	0.317877	0.097435	3.26245	0.00110452	0.0591255
ENST00000358919.6	DLC1	83.9144	2.75743	0.845228	3.26236	0.0011049	0.0591255
ENST00000396954.8	MOCS2	392.598	1.2419	0.380927	3.26021	0.00111329	0.0594438
ENST00000367590.9	XPR1	965.132	0.289856	0.089207	3.24925	0.0011571	0.0616481
ENST00000284273.6	UBASH3B	1714.1	0.416475	0.128352	3.2448	0.00117534	0.0624831
ENST00000357700.11	ASB13	92.7903	-0.770692	0.23797	-3.23861	0.00120113	0.0637151
ENST00000460006.6	CDS2	885.698	0.446777	0.138135	3.23435	0.00121919	0.0642658
ENST00000316793.7	OXTR	6250.7	-0.415727	0.128538	-3.23428	0.00121948	0.0642658
ENST00000424384.2	FYTTD1	23.1697	3.57266	1.10474	3.23394	0.00122095	0.0642658
ENST00000514265.1	AC078850.1	11.3288	1.57854	0.488156	3.23368	0.00122207	0.0642658
ENST00000309575.5	CHST2	198.776	0.613351	0.189913	3.22965	0.00123943	0.0650381
ENST00000487273.7	ADAM9	6677.08	-0.482378	0.149425	-3.22822	0.00124563	0.0652228
ENST00000228284.8	SART3	2.31219	4.1395	1.28317	3.226	0.00125533	0.0655897
ENST00000265734.8	CDK6	4494.67	-0.596689	0.185052	-3.22444	0.00126219	0.0656777
ENST00000588734.5	TK1	32.1199	5.51702	1.71127	3.22394	0.0012644	0.0656777
ENST00000631086.2	SAMD4A	90.5305	-5.06461	1.57102	-3.22378	0.00126511	0.0656777
ENST00000439158.5	ZSCAN31	2.46233	-4.2143	1.3081	-3.22169	0.00127438	0.0660184
ENST00000382133.9	PCOTH	42.1916	-0.942563	0.292666	-3.22061	0.00127918	0.0661261
ENST00000372391.7	DLG5	36.1328	4.2946	1.33604	3.21443	0.00130703	0.067423
ENST00000618787.5	ZNF283	5.89833	4.98103	1.54989	3.21378	0.00130999	0.0674324
ENST00000283006.7	CENPH	83.2924	-1.52431	0.474452	-3.21277	0.00131459	0.0675268
ENST00000440689.1	AL360270.1	2.917	-4.3767	1.36261	-3.21199	0.00131817	0.0675294
ENST00000620860.4	EIF2B3	174.365	-1.1172	0.34787	-3.21155	0.00132019	0.0675294
ENST00000258886.13	IREB2	1001.46	-0.572386	0.178444	-3.20764	0.00133828	0.0683111
ENST00000396085.6	NAV2	122.588	-1.01471	0.31643	-3.20674	0.00134247	0.0683816
ENST00000644715.2	MTAP	678.672	-0.679421	0.211931	-3.20586	0.00134661	0.0684496
ENST00000645439.1	CCDC82	21.2759	3.88031	1.21076	3.20486	0.00135128	0.0685435
ENST00000360718.5	SQSTM1	1365.25	-5.41313	1.68957	-3.20384	0.00135606	0.068643
ENST00000305997.8	MBOAT2	1565.69	-0.370859	0.115879	-3.20041	0.00137232	0.0693221
ENST00000313164.10	C7	2.26976	4.12042	1.28784	3.19949	0.00137673	0.0694008
ENST00000328965.9	OAF	344.657	0.365791	0.114441	3.19633	0.00139186	0.0699721
ENST00000258884.5	ABHD17C	138.265	0.570961	0.178652	3.19593	0.00139381	0.0699721
ENST00000303052.13	CSNK1G1	729.401	0.308819	0.0966606	3.19488	0.00139887	0.0700482
ENST00000378197.5	RPP38	17.3578	5.70246	1.78513	3.19443	0.00140108	0.0700482
ENST00000369183.9	FAM204A	819.362	-0.302467	0.094782	-3.19119	0.00141688	0.0706928
ENST00000539008.6	SYT7	95.709	-0.591951	0.185775	-3.18638	0.00144065	0.0714529
ENST00000370783.8	MOSPD1	731.061	-0.873432	0.274123	-3.18628	0.00144116	0.0714529
ENST00000251722.10	USP40	508.897	-0.45515	0.142864	-3.1859	0.00144306	0.0714529
ENST00000368324.5	SYT11	1681.79	0.367388	0.115323	3.18574	0.00144385	0.0714529
ENST00000586622.5	MFSD11	13.6454	5.00087	1.5702	3.18486	0.00144823	0.0715245
ENST00000379177.5	ZFX	275.072	-1.31915	0.414743	-3.18065	0.00146947	0.0724264
ENST00000228705.7	PPM1H	163.502	0.842801	0.265048	3.17981	0.00147373	0.0724898
ENST00000333027.7	MTMR3	324.947	-1.22017	0.38426	-3.17537	0.00149645	0.0734589
ENST00000296102.8	MRPL33	322.836	-3.14908	0.995063	-3.1647	0.00155242	0.0760531
ENST00000397762.6	RAB2B	420.481	0.34754	0.109863	3.16339	0.00155942	0.0762427
ENST00000237305.11	SGK1	393.958	2.49475	0.789244	3.16093	0.00157265	0.0766174
ENST00000409304.5	C1D	5062.6	3.37703	1.06841	3.1608	0.00157338	0.0766174
ENST00000555572.1	NME1-NME2	53.6176	1.27777	0.404333	3.1602	0.0015766	0.0766208
ENST00000269445.10	DYM	743.385	-0.25735	0.0814576	-3.15931	0.00158142	0.076702
ENST00000372936.4	TRMT2B	62.8616	3.56195	1.12825	3.15706	0.00159366	0.0771423
ENST00000288757.7	C12orf43	16.974	-5.66042	1.79367	-3.15578	0.00160067	0.0773277
ENST00000272369.14	MEIS1	592.798	-0.607483	0.192572	-3.15457	0.00160734	0.0773466
ENST00000428135.7	SNX13	1140.15	0.447579	0.141883	3.15456	0.00160742	0.0773466
ENST00000396594.7	GNE	796.162	0.28862	0.091643	3.1494	0.00163607	0.0785701
ENST00000398868.8	ATL3	7542.72	-0.162172	0.0515555	-3.14557	0.00165761	0.0793784
ENST00000375078.4	CAMK2N1	77.801	-0.733201	0.233143	-3.14485	0.00166171	0.0793784
ENST00000014930.9	HEBP1	278.981	-0.383167	0.121859	-3.14435	0.00166459	0.0793784
ENST00000370397.8	CHUK	765.77	0.438335	0.139415	3.14411	0.00166594	0.0793784
ENST00000265361.8	SEMA3C	12061.2	0.718059	0.228456	3.14309	0.00167176	0.0794998
ENST00000403458.9	C16orf86	2.14237	-4.05166	1.29001	-3.14079	0.00168495	0.0798156
ENST00000624979.1	AC022919.1	2.14237	-4.05166	1.29001	-3.14079	0.00168495	0.0798156
ENST00000439617.7	OGDH	256.486	-0.423317	0.134904	-3.13792	0.00170148	0.0803707
ENST00000344922.10	MIA3	1622.12	0.472426	0.150568	3.13762	0.00170327	0.0803707
ENST00000319942.8	RABGGTB	933.888	0.337988	0.107939	3.13128	0.00174046	0.0819664
ENST00000367339.7	ULBP3	151.714	-0.701557	0.224212	-3.12899	0.00175409	0.082449
ENST00000267460.9	PELI2	165.852	0.546354	0.175134	3.11963	0.0018108	0.0849506
ENST00000355312.8	GIT2	249.06	2.69263	0.863553	3.11808	0.00182033	0.0852333
ENST00000394001.1	KRT34	393.553	-0.817659	0.262476	-3.11517	0.00183837	0.0859131
ENST00000330992.8	COPG2	13.4373	3.85575	1.238	3.11449	0.00184263	0.085947
ENST00000374846.3	DYNLRB1	168.215	4.46336	1.43848	3.10283	0.00191681	0.0889948
ENST00000356847.8	GOLGA4	2898.91	0.6193	0.199601	3.10269	0.00191773	0.0889948
ENST00000375257.2	SLC35D2	10.6919	-1.59263	0.513338	-3.1025	0.00191894	0.0889948
ENST00000511262.5	NEK11	2.2627	4.0886	1.31863	3.10064	0.00193106	0.0893485
ENST00000369779.9	SLC16A4	855.791	1.184	0.381911	3.1002	0.0019339	0.0893485
ENST00000658086.1	SLC9A3-AS1	1.96398	3.94364	1.27256	3.09897	0.00194192	0.0895492
ENST00000327268.8	SLC16A6	48.5699	1.86782	0.604382	3.09046	0.00199846	0.0919818
ENST00000334828.6	PGAM1	2002.61	-0.422002	0.136601	-3.08932	0.00200617	0.0921629
ENST00000357736.9	MAFG	523.253	0.494651	0.160243	3.08687	0.00202274	0.0927237
ENST00000395686.8	ERO1A	1249.18	0.256161	0.0829981	3.08634	0.00202634	0.0927237
ENST00000578049.4	SEC22B	1364.28	0.306023	0.0991872	3.08531	0.00203341	0.0927237
ENST00000372829.8	ARMCX1	869.884	0.39043	0.126546	3.08528	0.00203361	0.0927237
ENST00000218432.10	PIN4	15.4461	-3.71725	1.20613	-3.08197	0.00205638	0.0935864
ENST00000295720.10	NEK10	20.8863	1.61837	0.525318	3.08074	0.0020649	0.0937989
ENST00000359337.9	PLXNB2	2017.89	-0.869254	0.28246	-3.07744	0.00208785	0.0946649
ENST00000275015.9	NFKBIE	106.631	-0.775954	0.252342	-3.07501	0.00210496	0.095263
ENST00000233813.5	IGFBP5	1702.87	-0.758749	0.246974	-3.07219	0.00212496	0.0959898
ENST00000621833.4	GUCD1	112.579	-4.24109	1.38243	-3.06785	0.00215605	0.0972139
ENST00000332180.9	PTPRM	2917.47	0.35627	0.116235	3.06509	0.00217602	0.0977316
ENST00000523505.2	AC090987.1	789.721	0.37306	0.121727	3.06472	0.00217876	0.0977316
ENST00000614161.1	AL353804.5	7.3352	1.94125	0.633472	3.06446	0.00218066	0.0977316
ENST00000286371.8	ATP1B3	2106.88	0.173891	0.0567637	3.06342	0.00218822	0.0977316
ENST00000269195.5	GALNT1	3037.52	0.245798	0.0802449	3.0631	0.0021906	0.0977316
ENST00000403056.2	BTBD9	15.9224	5.53758	1.80792	3.06296	0.00219162	0.0977316
ENST00000285419.8	PIP4P2	451.424	0.35967	0.117486	3.06138	0.00220318	0.0979673
ENST00000413371.6	ZNF512	355.095	-0.563293	0.184046	-3.06061	0.00220884	0.0979673
ENST00000393083.2	PTN	4.995	-4.77371	1.55973	-3.0606	0.00220897	0.0979673
ENST00000456793.2	OST4	17.5638	-5.06967	1.65736	-3.05888	0.00222166	0.098351
ENST00000557577.1	AC005280.2	2.48533	-4.16764	1.36394	-3.05558	0.00224624	0.0992584
ENST00000520820.2	UBR5-AS1	2.29904	4.08445	1.33787	3.05296	0.00226596	0.0999428
ENST00000222572.8	PON2	123.718	-3.90742	1.2801	-3.05243	0.00226993	0.0999428
ENST00000615388.1	DSTYK	1.94378	3.92321	1.2874	3.04739	0.0023084	0.101397
ENST00000452733.7	CYTH2	176.535	-2.99799	0.983912	-3.04701	0.00231129	0.101397
ENST00000245680.7	SLC35F5	5301.2	0.41933	0.137695	3.04536	0.00232398	0.101728
ENST00000400882.2	CCRL2	5.6414	-2.44995	0.804595	-3.04495	0.0023272	0.101728
ENST00000262139.10	WIPI1	1094.5	0.527288	0.173211	3.0442	0.00233301	0.101799
ENST00000435030.6	KIF5C	2.60482	4.2012	1.38084	3.0425	0.00234623	0.102129
ENST00000284031.13	DDAH1	204.386	-3.02541	0.994496	-3.04215	0.00234894	0.102129
ENST00000500447.1	MIR210HG	1.95286	3.92237	1.29246	3.03481	0.00240688	0.104144
ENST00000261296.7	TGDS	207.239	0.468181	0.154279	3.03464	0.00240821	0.104144
ENST00000643721.1	PKN2-AS1	845.916	-0.275655	0.0908573	-3.03393	0.00241391	0.104144
ENST00000286614.11	MMP16	2134.69	0.601075	0.198135	3.03366	0.00241604	0.104144
ENST00000354250.7	NDUFV3	412.01	0.358992	0.118359	3.03308	0.00242069	0.104144
ENST00000252809.3	GDF15	361.067	1.06805	0.352137	3.03305	0.00242095	0.104144
ENST00000374979.7	HLA-DRB5	1.9851	-3.94307	1.30048	-3.03202	0.00242923	0.104315
ENST00000359299.8	ANXA10	2.1492	4.00922	1.32364	3.02894	0.00245411	0.105198
ENST00000337702.5	TTC33	700.282	0.349236	0.115405	3.02618	0.00247661	0.105976
ENST00000338110.10	AC093512.2	2.76781	4.2483	1.40719	3.01899	0.00253622	0.108161
ENST00000504169.2	CDKN2AIP	63.2923	-2.60896	0.864345	-3.01843	0.00254089	0.108161
ENST00000343028.9	TM7SF3	1216.58	0.233699	0.0774244	3.01842	0.002541	0.108161
ENST00000336596.7	EPHA3	38.7628	0.821678	0.272575	3.0145	0.00257406	0.109377
ENST00000479961.1	ST20-MTHFS	3.76291	-3.1558	1.04883	-3.00888	0.00262217	0.111228
ENST00000254821.10	ZRANB2	216.517	-3.4837	1.15828	-3.00765	0.00263278	0.111483
ENST00000320963.9	RCN2	576.991	-4.88287	1.62484	-3.00513	0.00265465	0.112214
ENST00000397070.6	TM2D2	75.5037	5.22648	1.74143	3.00125	0.0026887	0.113457
ENST00000396842.7	EAF1	528.526	0.327485	0.109199	2.99898	0.00270888	0.114111
ENST00000295718.7	PTPRN	29.9343	1.85696	0.619336	2.99831	0.00271485	0.114164
ENST00000628399.1	RAD1	8.28508	5.09334	1.70078	2.9947	0.00274715	0.115323
ENST00000300087.7	DCTN5	1718.12	0.19263	0.0643433	2.99378	0.00275546	0.115473
ENST00000400590.7	GAB4	289.731	1.36414	0.456232	2.99002	0.00278962	0.116704
ENST00000275603.9	CCT6A	3238.32	-0.437452	0.146521	-2.9856	0.00283024	0.118047
ENST00000672774.1	ASCC1	112.946	2.76739	0.927013	2.98528	0.00283318	0.118047
ENST00000258774.10	HUS1	141.831	-0.829044	0.277742	-2.98495	0.00283627	0.118047
ENST00000397747.5	PDCD1LG2	1049.53	-0.458947	0.153813	-2.9838	0.0028469	0.118139
ENST00000336273.8	MTDH	4898.15	0.136814	0.0458599	2.9833	0.00285157	0.118139
ENST00000176763.10	STK10	240.439	-0.481408	0.1614	-2.98271	0.00285707	0.118139
ENST00000276925.7	CDKN2B	1162.3	1.11855	0.375021	2.98262	0.00285789	0.118139
ENST00000368494.4	NUS1	945.792	-0.240895	0.0807849	-2.98193	0.00286439	0.118207
ENST00000317623.8	PCNX4	841.531	-1.71566	0.575563	-2.98084	0.00287458	0.118427
ENST00000561294.5	CERS2	77.418	4.01111	1.34644	2.97906	0.00289135	0.118916
ENST00000381736.8	NUP58	676.557	0.280316	0.0941634	2.97691	0.00291171	0.119432
ENST00000253778.13	GFPT2	242.469	0.53949	0.181238	2.9767	0.00291369	0.119432
ENST00000215832.10	SNRPD3	2791.03	-0.262681	0.0882826	-2.97545	0.00292557	0.119673
ENST00000339732.10	GALNT15	96.3371	-0.733586	0.246579	-2.97505	0.00292939	0.119673
ENST00000546424.5	CASP9	31.4899	3.02667	1.0176	2.97432	0.00293642	0.119759
ENST00000373218.5	EIF4EBP2	1208.16	-0.685214	0.230682	-2.97038	0.00297429	0.120898
ENST00000302708.9	ALKBH3	283.2	0.352467	0.118661	2.97037	0.00297443	0.120898
ENST00000256996.8	MYBPC3	491.872	-0.43475	0.146407	-2.96947	0.00298312	0.120898
ENST00000311181.5	B4GAT1	397.871	0.460142	0.154989	2.96886	0.00298905	0.120898
ENST00000667310.1	SNHG10	21.09	-1.50752	0.50778	-2.96885	0.00298918	0.120898
ENST00000368315.8	ARHGEF2	168.594	-2.22752	0.752898	-2.9586	0.00309039	0.124784
ENST00000624886.1	AC009090.5	1.8134	-3.833	1.29619	-2.95712	0.00310529	0.125178
ENST00000338625.9	SLC25A15	184.988	-0.690546	0.23358	-2.95636	0.00311296	0.12528
ENST00000379719.8	IPO7	4426.35	0.287788	0.0973987	2.95474	0.00312931	0.12573
ENST00000322347.11	COX5A	378.247	-0.346465	0.117328	-2.95296	0.00314741	0.126249
ENST00000318348.9	GLTP	956.931	-0.407735	0.13815	-2.9514	0.00316339	0.126681
ENST00000533486.5	RAB30	571.6	-0.403943	0.136923	-2.95015	0.00317623	0.126779
ENST00000264454.8	SEC22C	398.001	-2.92328	0.990895	-2.95015	0.00317624	0.126779
ENST00000303305.11	PA2G4	901.999	0.420925	0.142859	2.94643	0.0032147	0.128016
ENST00000297447.10	OXR1	3.41976	4.40281	1.49444	2.94613	0.00321774	0.128016
ENST00000287598.10	MPV17L	231.706	-0.952092	0.323411	-2.9439	0.00324102	0.128731
ENST00000581641.1	TWSG1	69.3898	4.68464	1.59158	2.94339	0.00324635	0.128733
ENST00000470540.5	C1orf198	749.645	-5.4609	1.85651	-2.94149	0.00326639	0.129317
ENST00000215862.8	MORC2	4.23844	3.27659	1.1143	2.94048	0.00327706	0.129529
ENST00000670328.1	LINC02454	72.5073	0.589807	0.200638	2.93966	0.00328577	0.129656
ENST00000526630.2	GTF2H1	12.0085	-3.66445	1.24676	-2.93917	0.00329092	0.129656
ENST00000272091.8	SDE2	578.292	0.401693	0.136741	2.93762	0.00330743	0.130096
ENST00000435312.5	HOXB-AS1	3.43996	4.40296	1.49908	2.9371	0.00331297	0.130103
ENST00000380861.8	SLC30A5	812.604	0.307456	0.104715	2.93611	0.00332358	0.13031
ENST00000618819.5	PTPN9	616.207	0.300115	0.102322	2.93303	0.00335669	0.131397
ENST00000454575.6	DOCK7	2442.63	-0.427146	0.145729	-2.9311	0.00337763	0.131961
ENST00000337777.7	PLS1	10.3542	1.5209	0.518955	2.9307	0.00338194	0.131961
ENST00000473731.5	KIDINS220	2.11351	-3.97681	1.35733	-2.92988	0.00339092	0.132099
ENST00000371711.4	B4GALT5	734.531	0.322688	0.110166	2.9291	0.0033995	0.132222
ENST00000186436.10	TMEM131	518.048	-0.814873	0.278318	-2.92785	0.00341313	0.13254
ENST00000320623.10	NQO1	1383.57	1.39586	0.47722	2.92498	0.00344479	0.133557
ENST00000667010.1	LINC01151	1.81008	3.81037	1.30311	2.92407	0.00345487	0.133735
ENST00000267102.12	LMBR1L	207.441	0.694453	0.238118	2.91642	0.00354076	0.136842
ENST00000370550.10	HS2ST1	881.36	-0.373485	0.128359	-2.90969	0.00361782	0.139599
ENST00000367142.5	NUCKS1	8157.94	-0.245469	0.0843776	-2.90917	0.00362386	0.13961
ENST00000448372.5	SENP1	177.412	4.29951	1.4793	2.90645	0.0036556	0.140611
ENST00000548577.5	RNASEK	199.125	2.75283	0.948107	2.9035	0.00369013	0.141715
ENST00000287996.8	IPPK	37.8981	-1.18819	0.409645	-2.90054	0.00372516	0.142835
ENST00000215582.8	MISP	3.7832	-3.1439	1.08605	-2.89479	0.00379409	0.145249
ENST00000633032.1	TBCD	60.3851	-0.692685	0.239342	-2.89412	0.00380221	0.145332
ENST00000313732.8	CASP10	654.567	-1.37661	0.475929	-2.89246	0.00382236	0.145873
ENST00000218056.9	WDR13	323.682	0.489898	0.16946	2.89093	0.00384098	0.146354
ENST00000406540.5	SUPT7L	47.6296	-1.86824	0.646696	-2.8889	0.0038659	0.147074
ENST00000397703.6	AC107959.4	4.58016	-2.88545	0.999889	-2.88577	0.00390454	0.148312
ENST00000229595.6	ASF1A	591.212	-0.215558	0.0747754	-2.88274	0.00394235	0.149515
ENST00000222803.10	FKBP14	2007.8	0.330935	0.114818	2.88224	0.00394854	0.149516
ENST00000263334.9	PAX8	1.96195	3.87808	1.34582	2.88158	0.00395692	0.149547
ENST00000622607.4	ZNF133	84.7085	-5.06556	1.7582	-2.8811	0.00396295	0.149547
ENST00000359579.5	AKR1B10	12.7382	-1.80895	0.628032	-2.88035	0.00397239	0.149547
ENST00000505065.1	CDC42SE2	444.47	-0.617525	0.214409	-2.88013	0.00397507	0.149547
ENST00000434284.1	U52111.1	4.57938	2.84447	0.987752	2.87974	0.00398005	0.149547
ENST00000614211.2	DLG5	35.4672	4.4205	1.53568	2.87853	0.00399539	0.149892
ENST00000158771.9	DERL2	598.57	-0.256711	0.0893175	-2.87414	0.00405131	0.151569
ENST00000436881.2	AJM1	39.6014	0.839882	0.29223	2.87404	0.00405255	0.151569
ENST00000485064.1	NDUFB4	231.791	3.58201	1.2472	2.87204	0.00407827	0.152297
ENST00000347615.6	SMG7	19.8974	3.7398	1.30298	2.87018	0.0041024	0.152655
ENST00000242839.9	EBPL	46.5004	0.780714	0.272027	2.86999	0.00410487	0.152655
ENST00000382142.8	MTMR12	107.719	2.57275	0.896477	2.86985	0.00410666	0.152655
ENST00000332843.3	COLEC10	37.8554	-1.27452	0.444493	-2.86735	0.00413929	0.153633
ENST00000392701.8	GALNT3	24.5631	-1.2304	0.429671	-2.86359	0.00418875	0.155213
ENST00000601488.5	SIRT6	11.5439	-3.88905	1.35832	-2.86314	0.00419459	0.155213
ENST00000421806.3	MDC1-AS1	252.59	-1.34562	0.470239	-2.86157	0.00421554	0.155751
ENST00000637504.1	TPCN2	1.82783	-3.8079	1.33226	-2.85821	0.00426032	0.157111
ENST00000652901.1	NIPBL	4.5719	-4.59161	1.60667	-2.85785	0.00426524	0.157111
ENST00000561908.1	AC010547.4	160.856	-4.42816	1.55029	-2.85635	0.00428544	0.157616
ENST00000389462.8	PTMS	24.8202	3.68116	1.291	2.8514	0.00435265	0.159847
ENST00000531188.6	RPS3	9264.21	0.613913	0.215417	2.84988	0.00437355	0.160372
ENST00000626119.2	COPS7A	207.994	4.63452	1.62748	2.84766	0.00440415	0.161251
ENST00000441222.8	USP46	977.621	0.533005	0.187374	2.8446	0.00444669	0.162564
ENST00000548065.7	PRKAG1	1136.58	0.307106	0.108003	2.84349	0.0044623	0.162891
ENST00000649442.1	KAT6B	59.3352	-4.08467	1.43819	-2.84014	0.00450937	0.164362
ENST00000354586.5	STYX	626.124	0.278194	0.0980084	2.83847	0.00453304	0.164717
ENST00000640019.2	HSPA14	201.749	-2.03235	0.716096	-2.8381	0.00453824	0.164717
ENST00000467076.5	FDPS	713.841	-2.44543	0.861666	-2.83802	0.0045394	0.164717
ENST00000507980.1	RPS23	1138.49	2.84262	1.00184	2.8374	0.00454823	0.164792
ENST00000371224.7	ALDH18A1	1852.4	0.342226	0.120701	2.83531	0.00457816	0.165424
ENST00000290524.8	RFX5	708.665	-0.388419	0.136997	-2.83523	0.00457926	0.165424
ENST00000643070.1	CYTOR	18.6407	-4.28604	1.51216	-2.83438	0.00459146	0.165619
ENST00000617568.2	LINC02334	1.8212	3.78537	1.33779	2.82958	0.00466096	0.167877
ENST00000330475.9	ADAMTSL5	51.172	-0.784906	0.277674	-2.82672	0.00470281	0.169135
ENST00000301454.9	SLC25A23	61.922	0.574222	0.203302	2.82448	0.00473578	0.169646
ENST00000374142.9	ZDHHC18	274.075	0.432524	0.153141	2.82435	0.0047376	0.169646
ENST00000337919.9	HEY1	20.7333	1.09246	0.386845	2.82403	0.00474237	0.169646
ENST00000522314.5	ATOX1	345.371	1.90404	0.674267	2.82386	0.0047449	0.169646
ENST00000563094.5	UTP4	78.4977	-1.52134	0.539146	-2.82177	0.00477601	0.170305
ENST00000607956.1	AP000569.1	3.6083	3.03496	1.0756	2.82163	0.00477804	0.170305
ENST00000512701.6	TTC39B	595.944	0.381072	0.135095	2.82077	0.00479083	0.170305
ENST00000642395.1	SGCE	19.8736	4.12605	1.46294	2.82039	0.00479655	0.170305
ENST00000409404.6	FAT3	72.2273	0.833946	0.295697	2.82027	0.00479831	0.170305
ENST00000519948.4	ATXN7L3B	1482.01	0.255498	0.0906834	2.81747	0.0048404	0.171311
ENST00000367871.5	TBPL1	17.1107	3.75227	1.3318	2.81745	0.00484073	0.171311
ENST00000650767.1	ELAVL4	8.08293	1.76058	0.625512	2.81462	0.00488345	0.172521
ENST00000373935.4	IPMK	110.337	-0.522597	0.185697	-2.81425	0.00488909	0.172521
ENST00000378852.7	API5	307.381	1.25858	0.447629	2.81166	0.0049286	0.173664
ENST00000294008.4	SLX4	84.6857	-0.674319	0.239878	-2.81109	0.00493742	0.173723
ENST00000577860.5	CCDC144NL-AS1	5.11305	2.582	0.919068	2.80937	0.0049639	0.174403
ENST00000422521.2	ACYP2	1.65027	-3.69556	1.31594	-2.80831	0.0049802	0.174723
ENST00000624807.1	AC022336.3	2.34148	4.00973	1.42897	2.80603	0.00501565	0.175697
ENST00000374212.5	SLC31A1	1156.65	0.403726	0.1439	2.80559	0.00502239	0.175697
ENST00000342071.5	MRPL43	29.7487	3.81155	1.35946	2.80372	0.00505165	0.176467
ENST00000509852.6	MTX3	136.77	-3.5686	1.27485	-2.79923	0.00512242	0.178683
ENST00000465995.6	DNAJC24	382.503	0.336533	0.120297	2.79752	0.00514971	0.179378
ENST00000229708.4	ULBP1	249.823	-0.518121	0.185466	-2.79361	0.00521229	0.181298
ENST00000423064.7	HGF	14.3246	1.27716	0.457605	2.79096	0.00525517	0.182529
ENST00000393743.8	DDX60	179.327	-0.664928	0.238284	-2.79049	0.00526286	0.182536
ENST00000660597.1	DUBR	268.231	0.395782	0.141988	2.78743	0.00531283	0.184007
ENST00000228682.7	GLI1	117.433	0.861129	0.309563	2.78175	0.00540662	0.186989
ENST00000521508.2	ALG11	792.626	0.650091	0.23379	2.78066	0.00542477	0.187078
ENST00000647652.1	LINC00511	1.94175	3.83665	1.37985	2.78049	0.00542773	0.187078
ENST00000624774.1	AC079228.1	123.09	0.41491	0.149237	2.78022	0.00543223	0.187078
ENST00000295822.7	EIF5A2	830.195	0.315632	0.113652	2.77718	0.00548325	0.188328
ENST00000296657.7	ANKRD33B	128.968	-0.441099	0.158856	-2.77672	0.00549099	0.188328
ENST00000278426.8	SLC43A1	74.5932	0.744906	0.268272	2.77668	0.00549175	0.188328
ENST00000647188.2	DYRK1A	1173.13	0.377711	0.136288	2.77141	0.00558141	0.191134
ENST00000420463.7	EIF4B	3086.54	0.494168	0.178401	2.76999	0.00560583	0.191701
ENST00000523739.5	FZD6	189.837	-5.29475	1.91222	-2.76891	0.00562443	0.192067
ENST00000583037.5	HYI	36.9944	-3.95202	1.42897	-2.76564	0.0056812	0.193734
ENST00000435822.5	GUCD1	866.296	0.776959	0.280983	2.76515	0.00568972	0.193753
ENST00000570010.6	ZFP1	232.359	-0.490187	0.177395	-2.76325	0.00572283	0.194608
ENST00000262352.8	SLC1A1	617.656	0.277782	0.100596	2.76136	0.00575611	0.195467
ENST00000457511.7	MYO16	1.99097	-3.85521	1.39754	-2.75857	0.0058054	0.196866
ENST00000284274.5	OTULIN	273.35	-0.306258	0.111201	-2.7541	0.00588542	0.198834
ENST00000361822.8	ZNF277	420.664	0.467014	0.169589	2.75381	0.00589068	0.198834
ENST00000463937.1	ABHD14A-ACY1	49.6061	-4.08064	1.48183	-2.75379	0.00589092	0.198834
ENST00000301738.9	KCTD5	460.529	-0.290634	0.10555	-2.75351	0.00589608	0.198834
ENST00000318059.8	PAM16	13.294	5.1416	1.86773	2.75286	0.00590771	0.198888
ENST00000308924.8	CYP2W1	44.5938	4.39071	1.59517	2.75251	0.00591405	0.198888
ENST00000263681.7	POLD3	138.395	-0.618341	0.224776	-2.75092	0.00594289	0.199335
ENST00000378617.4	PIGO	102.662	-0.460047	0.167237	-2.75087	0.0059437	0.199335
ENST00000302424.12	TRIM8	23.632	2.10124	0.765075	2.74645	0.00602441	0.201764
ENST00000265140.10	SLF1	176.942	-0.513674	0.187207	-2.74388	0.0060718	0.202989
ENST00000229554.10	RSPH4A	1.79191	3.74667	1.36562	2.74356	0.00607765	0.202989
ENST00000529983.3	GALNT4	566.672	0.356125	0.129853	2.74252	0.00609703	0.203357
ENST00000394222.8	ARL13B	216.291	-0.409541	0.150273	-2.72531	0.00642407	0.213797
ENST00000238156.7	CCDC92	4.13069	4.43377	1.627	2.72513	0.00642761	0.213797
ENST00000417098.6	SATB2	135.112	-1.56877	0.576052	-2.72332	0.00646294	0.214409
ENST00000417354.3	DNM3OS	521.993	0.739724	0.271629	2.72328	0.00646363	0.214409
ENST00000403792.7	SMYD3	6.5498	-2.90339	1.06642	-2.72255	0.00647806	0.214596
ENST00000392205.2	TMEM147	90.527	3.34243	1.22895	2.71974	0.00653335	0.216133
ENST00000629597.2	MTFP1	3.48096	-3.68965	1.35886	-2.71525	0.00662267	0.218791
ENST00000270257.9	GEMIN7	159.958	-1.37431	0.506543	-2.71311	0.00666549	0.219907
ENST00000264712.8	KIF3C	358.51	0.455595	0.168078	2.71062	0.00671585	0.221268
ENST00000258742.10	NUP42	253.637	-0.390256	0.144019	-2.70976	0.00673324	0.221394
ENST00000333677.7	ARHGEF37	10.7556	1.47888	0.545807	2.70953	0.00673784	0.221394
ENST00000441760.2	FP700111.1	1.63584	-3.65807	1.35124	-2.70719	0.00678544	0.222658
ENST00000614352.4	GPR155	207.515	0.788924	0.291854	2.70315	0.00686863	0.225084
ENST00000220584.9	FDFT1	593.221	1.61551	0.597774	2.70254	0.0068811	0.22519
ENST00000354817.8	FAR1	1132.69	-0.292548	0.108277	-2.70185	0.00689548	0.225357
ENST00000379358.7	ZSCAN2	15.842	-1.72055	0.637086	-2.70065	0.00692037	0.225639
ENST00000651435.1	TBCB	20.81	4.28825	1.58801	2.70039	0.00692591	0.225639
ENST00000409654.5	EPC2	17.4436	1.01617	0.376394	2.69976	0.00693896	0.225639
ENST00000299767.10	HSP90B1	14703.9	0.214803	0.0795762	2.69934	0.00694766	0.225639
ENST00000371322.10	CYP2C19	887.885	1.70012	0.629883	2.6991	0.00695265	0.225639
ENST00000374431.7	LPAR1	2692.48	-0.515392	0.190973	-2.69877	0.0069597	0.225639
ENST00000507634.5	PACRGL	13.0587	-3.23371	1.19933	-2.69626	0.00701231	0.227042
ENST00000573396.5	CEP20	7.47287	3.38889	1.25772	2.69447	0.00704997	0.227656
ENST00000634146.1	CEP20	7.47287	3.38889	1.25772	2.69447	0.00704997	0.227656
ENST00000667384.1	CDC42	24.8915	-2.07321	0.769831	-2.69307	0.00707971	0.228313
ENST00000276055.4	CHST7	111.718	0.558278	0.207344	2.69252	0.00709138	0.228387
ENST00000237858.11	GLRX	2535.64	-0.755435	0.280871	-2.68962	0.00715334	0.230079
ENST00000549735.5	TMEM19	60.2776	-3.60402	1.34134	-2.68687	0.00721242	0.231673
ENST00000258400.4	HTR2B	4379.18	0.81337	0.302945	2.68488	0.00725559	0.232753
ENST00000423968.7	MRAS	428.062	-5.18971	1.93442	-2.68282	0.00730042	0.233882
ENST00000622395.4	B4GALT3	93.1336	3.32674	1.24067	2.68142	0.00733109	0.234556
ENST00000287042.5	KCNS2	1.48443	-3.55318	1.32559	-2.68045	0.00735227	NA
ENST00000368602.4	TRAPPC3L	1.48443	-3.55318	1.32559	-2.68045	0.00735227	NA
ENST00000656328.1	CHKB-DT	1.48443	-3.55318	1.32559	-2.68045	0.00735227	NA
ENST00000670302.1	INTS6-AS1	1.48443	-3.55318	1.32559	-2.68045	0.00735227	NA
ENST00000444192.5	SNHG32	79.9151	-2.9222	1.09028	-2.68023	0.00735722	0.235083
ENST00000375147.8	NCBP1	1108.71	-0.281663	0.105197	-2.67747	0.00741797	0.236714
ENST00000441248.5	EOLA1	63.7041	-1.93145	0.721516	-2.67694	0.00742983	0.236782
ENST00000366535.4	ADSS2	1049.56	0.426384	0.159496	2.67331	0.00751061	0.239044
ENST00000263966.8	USP13	253.311	-0.533427	0.199795	-2.66988	0.00758794	0.24119
ENST00000394890.6	P4HA1	3435.73	0.61958	0.232172	2.66863	0.00761622	0.241552
ENST00000316637.7	DEF6	1.6647	-3.65558	1.3699	-2.6685	0.00761917	0.241552
ENST00000273067.5	MARCHF4	279.805	-0.812331	0.304579	-2.66706	0.00765173	0.242268
ENST00000397267.5	SLC22A17	60.7487	-3.20155	1.20073	-2.66633	0.00766839	0.24248
ENST00000553312.1	AL079307.1	1.47299	3.53127	1.32652	2.66206	0.00776641	NA
ENST00000396024.7	ANXA2	8519.95	2.69519	1.01261	2.66161	0.00777671	0.245587
ENST00000550411.5	CBX5	2.66122	3.3863	1.27394	2.65813	0.0078575	0.247817
ENST00000341105.7	GATA2	64.3704	-0.814423	0.306612	-2.6562	0.00790258	0.248841
ENST00000306384.5	VAMP5	95.4658	-0.511055	0.192425	-2.65587	0.00791043	0.248841
ENST00000552740.5	DDIT3	343.212	0.491179	0.185028	2.65462	0.00793973	0.249441
ENST00000335793.4	CDC42EP4	377.173	-0.316424	0.119262	-2.65318	0.00797362	0.250183
ENST00000238961.9	SLF2	826.478	-0.356034	0.134389	-2.64928	0.0080664	0.252768
ENST00000324849.9	VPS37A	1399.06	0.236317	0.0892193	2.64872	0.00807976	0.252861
ENST00000333987.12	ZNF568	82.6793	-3.09163	1.16842	-2.64599	0.00814511	0.254446
ENST00000587424.2	SRSF8	365.8	0.343796	0.129943	2.64574	0.0081513	0.254446
ENST00000524851.5	RPS3	904.654	-4.12679	1.56018	-2.64507	0.00816747	0.254624
ENST00000375446.5	NINJ1	157.759	0.396046	0.149828	2.64333	0.00820948	0.255607
ENST00000579475.7	NOTCH2	4.06028	-3.14998	1.19202	-2.64255	0.00822843	0.255777
ENST00000290271.7	STC1	28.42	1.32311	0.500752	2.64224	0.00823597	0.255777
ENST00000361716.7	VAMP1	15.3076	-3.59697	1.36238	-2.64021	0.00828545	0.256986
ENST00000626782.2	CHD2	63.3083	-2.94863	1.11718	-2.63936	0.00830639	0.257308
ENST00000370944.9	ANKRD13C	1153.35	0.229197	0.0869413	2.63623	0.0083834	0.259364
ENST00000284165.10	MAX	104.986	-2.43602	0.926395	-2.62957	0.00854919	0.264157
ENST00000615507.4	ANAPC16	33.9347	-4.8618	1.85032	-2.62755	0.00860029	0.265399
ENST00000413818.2	AL031666.1	3.11952	-3.55454	1.35339	-2.6264	0.00862922	0.265955
ENST00000511422.1	AC114284.1	57.5711	-0.568686	0.216603	-2.62547	0.00865285	0.266346
ENST00000356674.7	HNRNPA2B1	2525.17	-0.462315	0.17624	-2.62321	0.00871067	0.267787
ENST00000615698.4	EEF1D	461.175	-4.85121	1.85192	-2.61956	0.00880437	0.270059
ENST00000268489.10	ZFHX3	11.5165	-3.10628	1.18585	-2.61947	0.00880675	0.270059
ENST00000377482.10	ERRFI1	521.38	0.302501	0.115505	2.61895	0.00882017	0.27013
ENST00000585598.1	PSMD8	4.7985	3.32337	1.27016	2.61651	0.0088835	0.271728
ENST00000356404.8	PITPNM1	222.02	0.485197	0.185509	2.6155	0.0089098	0.27219
ENST00000260702.4	LOXL4	1772.9	0.739704	0.282924	2.6145	0.00893583	0.272644
ENST00000520429.6	CCNC	1113.28	0.457928	0.175221	2.61343	0.00896382	0.273155
ENST00000334801.7	BCL9L	145.775	-0.449105	0.171944	-2.61192	0.00900358	0.273947
ENST00000324348.8	RNF227	13.8731	-4.98657	1.9094	-2.61159	0.0090123	0.273947
ENST00000453196.5	NIN	9.0679	-1.52155	0.582758	-2.61095	0.00902909	0.274115
ENST00000274217.4	OTULINL	452.057	0.778679	0.29843	2.60925	0.00907402	0.275088
ENST00000251810.8	RRM2B	1913.4	0.396269	0.151892	2.60889	0.00908372	0.275088
ENST00000652345.1	RBM15	1.62486	3.6084	1.38407	2.60708	0.00913168	0.276197
ENST00000371835.8	BRD4	97.7731	-0.700084	0.268831	-2.60418	0.0092094	0.278202
ENST00000672107.1	PRIM2	253.729	-0.591512	0.227522	-2.5998	0.0093277	0.281358
ENST00000397676.8	ALG3	93.2457	0.585546	0.225257	2.59946	0.00933701	0.281358
ENST00000261254.8	CCND2	420.344	-0.447855	0.172329	-2.59884	0.00935403	0.281523
ENST00000493615.5	NECTIN3	80.9737	-0.695213	0.267676	-2.59722	0.00939824	0.282504
ENST00000451608.2	AC006030.1	17.652	2.99357	1.15308	2.59615	0.00942755	0.283036
ENST00000309539.8	OLR1	546.908	-0.581385	0.224186	-2.59331	0.00950565	0.285029
ENST00000303904.8	COPS6	647.66	-0.380228	0.146682	-2.5922	0.00953653	0.285603
ENST00000396825.4	FITM2	204.472	-0.446729	0.172405	-2.59115	0.00956544	0.286117
ENST00000373493.10	RBBP4	2004.29	-0.164653	0.0636137	-2.58833	0.00964439	0.288125
ENST00000580087.5	TIMM21	6.32343	3.17587	1.22741	2.58746	0.0096687	0.288497
ENST00000326654.6	ERGIC1	20.2229	-1.68341	0.651133	-2.58536	0.00972787	0.289647
ENST00000252483.10	NECTIN2	183.158	-0.935363	0.361852	-2.58493	0.00973979	0.289647
ENST00000661977.1	AC106791.1	1.67056	-3.62789	1.40353	-2.58482	0.00974294	0.289647
ENST00000372791.7	ODF2	3.15394	-2.82982	1.0952	-2.58383	0.00977092	0.289904
ENST00000556095.5	GSKIP	584.924	-0.329774	0.127638	-2.58367	0.0097754	0.289904
ENST00000200453.6	PPP1R15A	854.168	0.297213	0.115056	2.58322	0.00978841	0.289937
ENST00000273223.10	RPL32	2.66325	3.36576	1.30355	2.582	0.00982299	0.290608
ENST00000258739.9	KDELR2	8952.3	0.126926	0.0491719	2.58128	0.00984352	0.290862
ENST00000536163.6	DENND11	17.8705	-2.32197	0.900019	-2.57991	0.00988249	0.291659
ENST00000350763.9	TNC	3022.72	-0.956802	0.370932	-2.57945	0.00989565	0.291694
ENST00000382247.6	DCAF16	457.208	0.255556	0.0990915	2.57899	0.00990898	0.291734
ENST00000248098.8	JPT2	727.142	-0.537752	0.208626	-2.57759	0.00994926	0.292566
ENST00000374168.7	RPS6KA1	6.27208	-1.85908	0.721424	-2.57696	0.00996722	0.292741
ENST00000230124.7	LINC01702	339.31	0.312171	0.121165	2.57642	0.00998305	0.292852
ENST00000505459.6	SRP19	587.492	0.270279	0.104932	2.57575	0.0100022	0.293059
ENST00000430365.7	VGLL4	650.321	0.412597	0.160317	2.57364	0.0100636	0.294505
ENST00000310803.10	RASGRP1	298.882	-0.422468	0.164299	-2.57134	0.0101307	0.296024
ENST00000344537.9	RCBTB2	46.4985	-0.898572	0.349578	-2.57045	0.0101568	0.296024
ENST00000193322.8	OSTM1	1563.48	0.314727	0.122446	2.57034	0.0101599	0.296024
ENST00000261318.5	C12orf49	1191.33	0.279724	0.108834	2.57019	0.0101641	0.296024
ENST00000403766.8	UBAC2	858.293	0.332632	0.12949	2.56878	0.0102057	0.296878
ENST00000235329.10	MFN2	1069.74	-0.270731	0.105417	-2.56819	0.0102232	0.296933
ENST00000409459.5	MTMR2	402.689	-3.46402	1.34918	-2.5675	0.0102436	0.296933
ENST00000613533.4	PER3	64.4335	-1.1116	0.432955	-2.56748	0.0102441	0.296933
ENST00000559729.5	SEC11A	82.3316	3.63463	1.41611	2.56663	0.0102692	0.297306
ENST00000332408.9	SHC4	108.64	0.777828	0.303369	2.56396	0.0103484	0.299244
ENST00000305963.2	MMGT1	821.318	0.21237	0.0828645	2.56285	0.0103816	0.299846
ENST00000317897.5	MAGEF1	400.862	0.361829	0.141256	2.5615	0.0104221	0.30066
ENST00000602262.1	AC002128.1	1.46187	3.49377	1.36439	2.56069	0.0104465	NA
ENST00000376958.5	GPR180	1042.38	0.303636	0.11864	2.55931	0.0104879	0.301967
ENST00000083182.8	APPBP2	2081.92	0.246137	0.0961856	2.55898	0.010498	0.301967
ENST00000322995.13	WDR45	27.432	3.35737	1.31211	2.55876	0.0105046	0.301967
ENST00000260126.9	SLCO5A1	1.4639	3.4936	1.36552	2.55844	0.0105144	NA
ENST00000451496.1	MAST4-AS1	1.4639	3.4936	1.36552	2.55844	0.0105144	NA
ENST00000529844.5	AP002495.1	2.52874	3.96023	1.54993	2.5551	0.0106157	0.3048
ENST00000396049.5	MOB1A	3627.29	-0.138034	0.0540392	-2.55433	0.0106391	0.305113
ENST00000370680.5	PRKACB	3.09507	2.80193	1.09763	2.55271	0.0106887	0.306028
ENST00000375429.8	NELFE	7.26289	-2.50691	0.98215	-2.55247	0.0106962	0.306028
ENST00000262120.10	TWSG1	3429.5	-0.350372	0.137341	-2.55112	0.0107379	0.306692
ENST00000355619.10	FBXL3	1270.85	-0.291126	0.114127	-2.5509	0.0107445	0.306692
ENST00000371873.9	CMPK1	3952.19	0.221681	0.0869219	2.55034	0.0107617	0.306821
ENST00000297146.7	GPR85	32.1379	0.917751	0.35992	2.54988	0.0107761	0.306874
ENST00000321599.9	IP6K1	779.753	0.212884	0.0835118	2.54915	0.0107986	0.306881
ENST00000249504.7	HOXD11	133.476	-0.368357	0.144507	-2.54905	0.0108016	0.306881
ENST00000329271.8	GRPEL2	515.677	0.491267	0.19288	2.54701	0.0108649	0.308053
ENST00000399362.8	CLASP2	1009.42	0.384293	0.150886	2.54691	0.0108681	0.308053
ENST00000461868.1	PFN2	18.8372	2.65097	1.04127	2.5459	0.0108998	0.308591
ENST00000359209.11	KIRREL1	648.658	1.02286	0.401869	2.54526	0.0109196	0.308793
ENST00000352393.8	CPNE1	715.546	-0.175254	0.0688923	-2.54389	0.0109626	0.309086
ENST00000591372.2	LINC00665	39.8033	-0.77978	0.306572	-2.54354	0.0109735	0.309086
ENST00000638572.2	ST3GAL5	323.788	0.383652	0.150848	2.5433	0.0109811	0.309086
ENST00000298139.7	WRN	340.722	0.58234	0.229061	2.5423	0.0110126	0.309086
ENST00000375095.2	RNF5	24.3258	3.95488	1.55566	2.54225	0.0110143	0.309086
ENST00000401061.9	MMACHC	89.2807	-0.490217	0.192862	-2.5418	0.0110282	0.309086
ENST00000265260.8	PCNP	2552.16	-0.230091	0.0905315	-2.54156	0.0110359	0.309086
ENST00000303575.9	TMED10	8322.56	0.185104	0.0728414	2.54119	0.0110476	0.309086
ENST00000273598.7	ABHD14A	149.9	0.516799	0.203374	2.54113	0.0110496	0.309086
ENST00000273990.6	DDIT4L	28.2293	0.888863	0.349823	2.54089	0.0110569	0.309086
ENST00000399837.8	ADA2	4.80738	-2.16277	0.851602	-2.53965	0.0110963	0.309744
ENST00000411948.7	COX20	762.601	0.229504	0.0903791	2.53935	0.0111059	0.309744
ENST00000395245.9	RAB34	1075.52	1.47332	0.580647	2.53738	0.0111685	0.311134
ENST00000668290.1	LYPLAL1-DT	6.26455	2.03887	0.803685	2.53691	0.0111837	0.3112
ENST00000368802.8	REV3L	431.482	-4.70077	1.85454	-2.53475	0.0112529	0.312769
ENST00000264716.9	FOSL2	272.338	-2.57309	1.01554	-2.53371	0.0112861	0.313334
ENST00000538714.5	PLEKHA5	501.92	0.468846	0.185095	2.53301	0.0113089	0.313609
ENST00000252979.6	ZNF337	46.9107	-4.28227	1.69152	-2.53162	0.0113537	0.314494
ENST00000379375.6	EDN1	85.2124	0.496911	0.196527	2.52846	0.0114563	0.316894
ENST00000268261.9	PMM2	624.203	0.432782	0.171189	2.5281	0.0114683	0.316894
ENST00000375019.6	ANKS6	13.7004	-4.15071	1.64205	-2.52776	0.0114794	0.316894
ENST00000357992.9	ELK4	1243.93	-0.721683	0.285889	-2.52434	0.0115914	0.319624
ENST00000311128.10	DENND6A	314.617	0.540285	0.21414	2.52305	0.0116341	0.320197
ENST00000374270.7	PDIK1L	190.503	-0.516975	0.204942	-2.52254	0.0116509	0.320197
ENST00000614147.1	EBAG9	22.7831	-4.62829	1.83479	-2.52252	0.0116517	0.320197
ENST00000662319.1	CCDC144NL-AS1	139.318	-1.0568	0.419074	-2.52174	0.0116775	0.320341
ENST00000257075.9	PUM1	203.072	3.7369	1.48197	2.52157	0.0116832	0.320341
ENST00000564466.5	ZDHHC7	209.51	1.06798	0.42385	2.51972	0.0117449	0.321671
ENST00000457354.7	TMX1	1612.97	-0.338483	0.134378	-2.51889	0.0117724	0.322062
ENST00000509910.2	ATG12	1438.1	0.215206	0.085509	2.51677	0.0118436	0.323646
ENST00000481490.3	FSBP	283.475	0.464269	0.184514	2.51617	0.0118638	0.323791
ENST00000472745.1	TCEAL4	210.912	-3.60898	1.43451	-2.51582	0.0118755	0.323791
ENST00000379999.6	FBH1	721.594	-0.23488	0.0934579	-2.51322	0.0119636	0.325077
ENST00000358344.8	HNRNPAB	171.288	-4.5415	1.80728	-2.5129	0.0119743	0.325077
ENST00000238788.14	TMEM214	522.85	0.420916	0.167503	2.51288	0.0119748	0.325077
ENST00000337898.10	PPHLN1	11.6211	-4.0369	1.60669	-2.51255	0.0119862	0.325077
ENST00000476224.2	AL512625.1	2.39234	3.89998	1.55264	2.51184	0.0120104	0.325077
ENST00000607625.1	AC104118.1	5.43854	2.0692	0.823835	2.51167	0.0120161	0.325077
ENST00000432230.6	AF127577.4	179.995	-0.490962	0.195472	-2.51167	0.0120162	0.325077
ENST00000654900.1	AC005280.1	3.13751	2.80307	1.11699	2.50948	0.012091	0.326739
ENST00000475406.5	SERTAD4-AS1	36.2157	-2.64001	1.05289	-2.50738	0.0121628	0.328316
ENST00000596046.1	RPS5	1432.72	-3.26312	1.30182	-2.50659	0.0121903	0.328693
ENST00000367763.7	PRRX1	278.575	0.398747	0.159128	2.50582	0.0122167	0.328862
ENST00000615264.4	PSME2	1062.35	-0.392239	0.156544	-2.50562	0.0122236	0.328862
ENST00000437429.6	SLC16A4	126.132	3.31421	1.32372	2.50371	0.01229	0.330283
ENST00000401473.7	HMGA1	40.1299	1.76767	0.70676	2.50108	0.0123814	0.332372
ENST00000268802.10	NOB1	403.985	0.369443	0.147803	2.49956	0.0124347	0.333435
ENST00000257209.8	FHOD3	75.7851	-0.869131	0.347892	-2.49828	0.0124797	0.334274
ENST00000420843.7	ARRB1	398.601	-0.98316	0.393824	-2.49644	0.0125445	0.335642
ENST00000487159.5	TRAK1	816.252	-0.248575	0.0996393	-2.49475	0.0126045	0.336877
ENST00000324219.8	MAP4K4	19.6547	-4.33277	1.73728	-2.49399	0.0126316	0.337229
ENST00000637318.1	EHMT1	3.12237	-2.80212	1.12439	-2.49213	0.0126979	0.338629
ENST00000381801.5	MTMR6	2060.27	-0.282005	0.113184	-2.49157	0.012718	0.338794
ENST00000322611.4	BASP1	920.118	0.365027	0.146545	2.49089	0.0127425	0.339077
ENST00000372950.6	DNAJC9	202.984	-1.18888	0.477966	-2.48736	0.0128694	0.342079
ENST00000280571.9	RILPL2	169.861	-0.44079	0.17724	-2.48696	0.012884	0.342093
ENST00000185150.9	ERLEC1	2401.17	0.321072	0.129133	2.48637	0.0129052	0.342283
ENST00000543774.6	KAT8	148.869	0.347874	0.140022	2.48443	0.0129759	0.343785
ENST00000383202.7	STAG1	2504.73	0.247449	0.0996256	2.48379	0.0129992	0.343801
ENST00000308860.11	ADCK5	17.8684	2.54275	1.0238	2.48364	0.0130048	0.343801
ENST00000409434.5	TXNDC9	92.9164	-0.801414	0.322842	-2.48237	0.0130512	0.344237
ENST00000228865.3	CREBL2	1075.99	0.283561	0.114232	2.48233	0.0130525	0.344237
ENST00000367188.5	PPP1R15B	1495.08	0.22134	0.089177	2.48203	0.0130637	0.344237
ENST00000322054.10	EHD3	959.31	0.327624	0.132087	2.48037	0.0131245	0.345466
ENST00000409177.6	FHL2	85.1925	-0.58642	0.236477	-2.47983	0.0131447	0.345623
ENST00000405159.7	FAM104A	21.7261	-3.79946	1.53247	-2.4793	0.0131641	0.34576
ENST00000595669.5	JOSD2	56.6532	3.39462	1.36984	2.47811	0.0132079	0.346094
ENST00000229329.7	CMAS	422.548	0.280697	0.113285	2.47779	0.01322	0.346094
ENST00000311502.12	RABL6	750.163	-0.389511	0.15723	-2.47733	0.013237	0.346094
ENST00000295685.14	ARPC2	1539.14	-3.31612	1.33917	-2.47625	0.013277	0.346094
ENST00000323460.10	SENP5	1340.03	0.26362	0.106463	2.47617	0.0132801	0.346094
ENST00000374595.8	CTNNAL1	682.483	-0.967665	0.390821	-2.47598	0.0132872	0.346094
ENST00000652225.1	AC073263.1	475.047	-1.65147	0.667018	-2.4759	0.0132902	0.346094
ENST00000365484.1	RNY3	152.233	-0.513699	0.207485	-2.47583	0.0132926	0.346094
ENST00000267522.7	WDR89	19.9426	3.21747	1.29975	2.47545	0.0133068	0.346094
ENST00000651385.1	CC2D2A	11.4993	3.46249	1.39902	2.47493	0.0133261	0.346094
ENST00000451578.6	TMEM159	39.667	3.84657	1.55437	2.47468	0.0133357	0.346094
ENST00000470760.2	SUCLA2	22.5808	-2.39986	0.969891	-2.47436	0.0133474	0.346094
ENST00000371899.9	SLC2A6	29.0419	-0.89163	0.360864	-2.47082	0.0134803	0.349125
ENST00000366691.4	RHOU	117.919	-0.797182	0.322725	-2.47016	0.0135052	0.349125
ENST00000538582.5	PYROXD1	144.769	3.13704	1.27	2.47011	0.0135073	0.349125
ENST00000369660.9	UBL4A	608.856	-0.455689	0.18452	-2.4696	0.0135264	0.349249
ENST00000368072.9	COPA	291.74	0.260023	0.105344	2.46832	0.0135751	0.349964
ENST00000285279.10	VOPP1	1449.38	-0.194157	0.0786662	-2.46811	0.0135829	0.349964
ENST00000361221.8	ARHGEF10L	54.0878	-0.667155	0.270366	-2.4676	0.0136021	0.350089
ENST00000562206.1	TPPP3	1.31273	-3.36757	1.36554	-2.46611	0.0136591	NA
ENST00000513661.5	GRPEL2	7.83658	4.59161	1.86652	2.45999	0.0138942	0.357229
ENST00000653104.1	LINC01572	7.47656	-1.60355	0.652006	-2.45942	0.0139163	0.357301
ENST00000280098.9	SPOPL	670.643	0.201129	0.0818	2.45879	0.0139405	0.357301
ENST00000343546.8	P4HTM	277.641	0.345743	0.140616	2.45878	0.013941	0.357301
ENST00000396600.6	ABAT	47.8735	-0.873464	0.355356	-2.45799	0.0139716	0.357707
ENST00000328194.8	DENND5A	2094.33	-0.16409	0.0667822	-2.45708	0.014007	0.358237
ENST00000393467.1	CAV1	30453.6	-0.302703	0.123226	-2.4565	0.0140299	0.358447
ENST00000272444.7	DUSP11	240.529	0.575105	0.234217	2.45544	0.0140713	0.359128
ENST00000470264.3	RN7SL738P	3.13675	-2.29037	0.933043	-2.45473	0.0140989	0.359384
ENST00000285599.8	MAN2B2	631.357	0.608014	0.247721	2.45443	0.0141108	0.359384
ENST00000221200.9	KCTD9	525.636	-0.476839	0.194424	-2.45256	0.0141842	0.360638
ENST00000613358.4	PGRMC2	4.97182	-3.31624	1.35223	-2.45242	0.0141897	0.360638
ENST00000369278.5	UFL1	530.629	-0.587845	0.239872	-2.45066	0.0142595	0.361917
ENST00000380871.5	NKX3-1	17.8039	-0.994246	0.405749	-2.4504	0.0142698	0.361917
ENST00000621109.4	PSG9	1.32716	-3.36756	1.37524	-2.4487	0.0143373	NA
ENST00000379205.5	C4orf46	288.99	-0.540773	0.220843	-2.44867	0.0143383	0.363278
ENST00000521369.2	AC027031.2	154.356	0.482759	0.197209	2.44795	0.0143671	0.36347
ENST00000429071.5	IFRD1	57.8909	-3.43732	1.40442	-2.4475	0.0143853	0.36347
ENST00000372236.9	POLH	433.225	-0.57261	0.233971	-2.44736	0.0143907	0.36347
ENST00000409060.1	MED20	10.9973	3.63418	1.48547	2.44648	0.0144261	0.363985
ENST00000541990.5	THBS3	6.43714	2.54836	1.04257	2.44432	0.0145127	0.365793
ENST00000305233.6	PWWP2B	32.8746	3.57011	1.46162	2.44257	0.014583	0.366827
ENST00000262903.9	HACE1	472.791	0.458823	0.187846	2.44255	0.0145839	0.366827
ENST00000649078.1	MSL3	114.827	3.33362	1.36519	2.44187	0.0146113	0.367027
ENST00000286713.7	STOM	1342.98	-0.292447	0.119776	-2.44161	0.014622	0.367027
ENST00000618628.4	ENC1	159.124	-3.82389	1.5668	-2.44058	0.0146638	0.367392
ENST00000558566.1	TINF2	5.666	2.38179	0.97594	2.44051	0.0146667	0.367392
ENST00000313234.9	KRT80	32.6316	-0.724957	0.297294	-2.43852	0.0147474	0.369028
ENST00000458258.5	PTBP3	847.676	-1.59552	0.654396	-2.43816	0.0147623	0.369028
ENST00000241502.9	FYTTD1	3064.1	-0.340761	0.140038	-2.43334	0.0149602	0.372379
ENST00000384215.1	SNORA9	3.75095	-2.53789	1.04303	-2.4332	0.014966	0.372379
ENST00000543470.5	RPS6KC1	164.163	-4.40285	1.80955	-2.43311	0.0149697	0.372379
ENST00000392456.4	CCDC50	816.719	-0.269291	0.110678	-2.43311	0.01497	0.372379
ENST00000338700.10	TRIM2	1474.16	-0.34107	0.140203	-2.43269	0.0149873	0.372379
ENST00000220772.8	SFRP1	18.8362	-1.40652	0.578182	-2.43267	0.0149881	0.372379
ENST00000476941.6	TRPC1	352.092	-0.461148	0.189694	-2.43101	0.0150567	0.373687
ENST00000263805.8	ZNF106	3016.5	-0.419939	0.17278	-2.43049	0.0150785	0.373687
ENST00000566442.5	GANC	78.9434	0.612984	0.252289	2.42969	0.0151116	0.373687
ENST00000670451.1	TMEM161B-AS1	33.6577	-1.29741	0.534001	-2.4296	0.0151156	0.373687
ENST00000381006.8	RUFY3	583.833	0.323648	0.133223	2.42938	0.0151248	0.373687
ENST00000330817.11	ALG12	221.659	0.512232	0.210866	2.42918	0.0151329	0.373687
ENST00000618166.4	SCAMP1	12.229	4.3236	1.78066	2.42809	0.0151784	0.374099
ENST00000381527.8	CDK8	301.758	0.253855	0.104566	2.42771	0.0151944	0.374099
ENST00000374045.5	TNFSF15	11.6702	3.47133	1.4299	2.42768	0.0151957	0.374099
ENST00000265381.7	APBA1	16.66	1.2311	0.507326	2.42665	0.0152388	0.374783
ENST00000285667.4	HSPA13	3539.3	0.387191	0.159646	2.42531	0.0152953	0.375648
ENST00000393565.5	DBN1	11.3005	2.38864	0.984973	2.42508	0.0153049	0.375648
ENST00000369800.6	NEURL1B	77.8803	-0.984443	0.406108	-2.42409	0.0153467	0.376295
ENST00000317811.6	FJX1	579.664	0.398768	0.16455	2.42339	0.0153765	0.376647
ENST00000396408.8	ZNF765	296.206	0.246568	0.101872	2.42038	0.0155042	0.379392
ENST00000393223.7	LGMN	830.591	2.55531	1.05602	2.41975	0.0155312	0.379671
ENST00000401990.5	SEPTIN2	582.757	4.73103	1.95978	2.41405	0.0157761	0.385272
ENST00000367500.9	SWT1	125.607	0.828392	0.343456	2.41193	0.0158683	0.387135
ENST00000304611.13	PEX6	365.484	0.245658	0.101904	2.41069	0.0159225	0.38807
ENST00000281830.3	KCNE4	407.555	0.45198	0.187731	2.4076	0.016058	0.390497
ENST00000397515.6	UBE2I	119.676	-3.69665	1.53551	-2.40744	0.0160649	0.390497
ENST00000310169.3	CHRNA9	39.4993	1.32191	0.549124	2.40732	0.0160702	0.390497
ENST00000586349.5	AC024592.3	98.8107	-3.0715	1.27631	-2.40654	0.0161043	0.390936
ENST00000539479.6	MDM2	56.1992	-1.89661	0.788235	-2.40615	0.0161218	0.390969
ENST00000618183.4	HNRNPA2B1	9.26341	4.59609	1.91293	2.40264	0.0162772	0.394219
ENST00000319104.7	RNF170	19.6848	-3.42589	1.42603	-2.40239	0.0162882	0.394219
ENST00000369449.7	CLIC2	63.9438	-0.700104	0.291567	-2.40118	0.0163424	0.394726
ENST00000446845.5	OXSR1	2.70663	-3.9301	1.63683	-2.40104	0.0163484	0.394726
ENST00000672640.1	CHRNA1	8.37301	-1.2549	0.522694	-2.40083	0.0163577	0.394726
ENST00000368325.5	CENPW	89.0584	1.82364	0.759723	2.4004	0.0163773	0.394805
ENST00000530022.5	RPL27A	4078.82	-0.694177	0.289298	-2.39952	0.0164164	0.395359
ENST00000335698.4	ATP5F1C	627.332	-0.471463	0.196838	-2.39519	0.0166119	0.398287
ENST00000605794.5	PKD1P6-NPIPP1	95.5073	0.50589	0.211241	2.39485	0.0166273	0.398287
ENST00000654676.1	AP003120.1	5.92306	1.9746	0.824635	2.39451	0.0166424	0.398287
ENST00000374822.8	NRP1	234.583	3.41211	1.42503	2.39441	0.016647	0.398287
ENST00000369067.7	RPRD2	8.63563	2.90868	1.21481	2.39436	0.0166495	0.398287
ENST00000393987.2	DNPH1	45.664	-1.36573	0.570458	-2.3941	0.0166613	0.398287
ENST00000263629.9	MTIF2	561.45	-0.39247	0.163944	-2.39393	0.0166688	0.398287
ENST00000546318.2	IFIT1	549.338	-0.221095	0.0923564	-2.39393	0.0166689	0.398287
ENST00000403999.7	NF2	84.9834	-3.58434	1.49779	-2.39308	0.0167075	0.398818
ENST00000331808.5	DEXI	286.02	-0.424407	0.1775	-2.39103	0.0168012	0.400662
ENST00000366592.8	GPR137B	176.506	-0.841672	0.352567	-2.38727	0.016974	0.403785
ENST00000261879.10	APH1B	431.152	0.315466	0.132146	2.38724	0.0169752	0.403785
ENST00000373044.3	YRDC	230.396	0.45715	0.191509	2.3871	0.0169819	0.403785
ENST00000574590.6	KANSL1	13.4963	-3.57845	1.49975	-2.38602	0.0170317	0.404295
ENST00000302692.7	SLC25A33	155.865	-0.348276	0.145971	-2.38592	0.0170366	0.404295
ENST00000293662.9	TAMALIN	26.9051	0.848391	0.355704	2.3851	0.0170743	0.404795
ENST00000542554.5	PRRG1	412.179	0.458087	0.192096	2.38467	0.0170943	0.404875
ENST00000356457.9	ASPH	9.19626	4.57033	1.91689	2.38424	0.0171144	0.404958
ENST00000610139.5	DCAF8	17.0377	-2.80314	1.17624	-2.38314	0.0171657	0.405777
ENST00000632675.1	EEF1D	134.639	4.41418	1.85415	2.3807	0.0172796	0.408072
ENST00000543510.1	TMEM258	8.59835	2.68925	1.12996	2.37996	0.0173144	0.408372
ENST00000243776.11	CHPF	1184.77	0.59063	0.248193	2.37972	0.0173258	0.408372
ENST00000627474.2	UGP2	4.24597	-3.11922	1.31127	-2.37879	0.0173698	0.409012
ENST00000219548.9	STUB1	614.754	-0.354827	0.14931	-2.37645	0.0174803	0.411218
ENST00000397225.2	MPST	640.283	0.409521	0.172364	2.37591	0.0175056	0.411416
ENST00000363444.1	AL109920.1	149.442	-0.494022	0.207997	-2.37514	0.0175424	0.411882
ENST00000458198.3	CDKN2AIPNL	211.193	-0.639583	0.269331	-2.37471	0.0175628	0.411965
ENST00000424236.5	DCTN4	2.18758	3.74897	1.57987	2.37297	0.0176459	0.413179
ENST00000013222.5	INMT	39.0762	-1.1896	0.501326	-2.37291	0.0176485	0.413179
ENST00000379226.9	APOO	53.5882	-0.725151	0.305734	-2.37184	0.0177	0.413986
ENST00000421351.4	PERP	548.494	-0.313375	0.132178	-2.37086	0.0177469	0.414672
ENST00000664640.1	MYO6	42.214	1.80885	0.763064	2.37051	0.0177634	0.414672
ENST00000418543.8	WDR83	74.6705	0.481234	0.203119	2.36922	0.0178255	0.415724
ENST00000274311.3	PELO	1513.13	0.259521	0.109588	2.36816	0.0178768	0.416521
ENST00000320672.8	SSBP2	486.386	0.395824	0.167218	2.36711	0.0179276	0.417306
ENST00000609714.1	ZNF718	56.4704	-0.526194	0.222385	-2.36614	0.0179749	0.417925
ENST00000602422.1	AL049840.6	53.9799	-0.642205	0.271448	-2.36585	0.0179886	0.417925
ENST00000351030.7	ODF2	287.017	-0.408714	0.172818	-2.36499	0.0180304	0.418468
ENST00000290216.14	SCRN2	104.165	-0.501728	0.212196	-2.36445	0.0180568	0.418468
ENST00000541481.5	POSTN	309.244	2.01107	0.850592	2.36431	0.0180635	0.418468
ENST00000328850.8	FES	30.2805	-1.17945	0.49919	-2.36272	0.0181412	0.419669
ENST00000670944.1	NCKAP5-AS2	7.55829	1.45153	0.614392	2.36255	0.0181498	0.419669
ENST00000402538.7	RASGRP3	25.704	-1.2329	0.522351	-2.3603	0.0182603	0.421282
ENST00000590923.5	AP1M2	50.3307	-1.13283	0.479956	-2.36028	0.018261	0.421282
ENST00000284268.8	ANKH	577.715	0.40419	0.171262	2.36007	0.0182715	0.421282
ENST00000292211.5	UBE2Q1	675.508	0.402536	0.170609	2.35941	0.0183039	0.421631
ENST00000340635.11	PDE4D	405.1	0.60201	0.255274	2.35829	0.0183595	0.42251
ENST00000266546.11	CLSTN3	112.949	0.753486	0.319647	2.35724	0.0184112	0.422909
ENST00000610128.2	LINC02035	51.6553	-0.518831	0.220115	-2.35709	0.018419	0.422909
ENST00000296280.10	RPL39L	903.341	-0.427639	0.181442	-2.35689	0.0184289	0.422909
ENST00000668176.1	AC108519.1	2.74023	2.64472	1.12501	2.35083	0.0187315	0.429154
ENST00000510047.5	ATPSCKMT	39.099	-4.41379	1.87762	-2.35074	0.0187363	0.429154
ENST00000340607.5	PTGES	38.6064	-0.595512	0.253406	-2.35003	0.0187721	0.42957
ENST00000443185.7	ZNF516	1056.48	-0.424965	0.18092	-2.34891	0.0188287	0.430039
ENST00000283875.6	GTF2E1	383.521	0.256648	0.109267	2.34882	0.018833	0.430039
ENST00000369454.4	RAB39B	17.3854	1.13585	0.483634	2.34857	0.0188456	0.430039
ENST00000341191.11	ZNF823	99.6283	-0.447051	0.190431	-2.34758	0.018896	0.430775
ENST00000372070.7	AKR1A1	886.133	0.347812	0.148179	2.34724	0.0189132	0.430775
ENST00000610426.5	NSA2	1672.71	0.589156	0.251421	2.3433	0.0191138	0.434749
ENST00000315150.9	FLAD1	112.985	-3.65563	1.56016	-2.34312	0.0191234	0.434749
ENST00000354958.6	PLEC	2.17079	-3.73417	1.59395	-2.34271	0.0191442	0.434817
ENST00000619920.4	PSMC3	133.086	-0.885546	0.378083	-2.3422	0.0191704	0.435006
ENST00000288266.8	APPL1	1051.93	0.279391	0.119348	2.34099	0.0192329	0.436017
ENST00000188790.9	FAP	1811.52	-2.26545	0.967984	-2.34038	0.0192642	0.436239
ENST00000354884.8	SLC39A13	331.821	1.96848	0.841196	2.3401	0.0192785	0.436239
ENST00000308086.3	THAP2	162.489	0.429823	0.183792	2.33864	0.019354	0.437542
ENST00000378116.9	FAM171A1	350.389	-0.337977	0.144609	-2.33718	0.0194297	0.438447
ENST00000254958.10	JAG1	189.94	0.61982	0.265201	2.33717	0.0194301	0.438447
ENST00000380496.5	HAUS6	22.5313	1.76052	0.754926	2.33204	0.0196987	0.444097
ENST00000321250.13	LEPROTL1	871.12	-0.272997	0.117102	-2.33128	0.0197386	0.444585
ENST00000435275.5	RPS24	57.6271	-2.9788	1.27891	-2.32917	0.01985	0.446681
ENST00000377801.8	PLCXD3	394.567	1.17442	0.504336	2.32865	0.0198778	0.446893
ENST00000623411.1	AC109454.4	2.80273	-2.65754	1.14199	-2.32712	0.0199588	0.4483
ENST00000531743.5	FAU	526.086	2.09614	0.901927	2.32407	0.0201219	0.451546
ENST00000253039.9	EIF2S3	4170.14	0.275674	0.118688	2.32267	0.0201966	0.452682
ENST00000559281.6	TPM1	31.7218	3.84829	1.65724	2.3221	0.0202273	0.452682
ENST00000302271.11	HNRNPR	493.642	3.67468	1.58249	2.32209	0.0202283	0.452682
ENST00000262043.7	MEOX2	1404.63	-0.315877	0.136151	-2.32004	0.0203385	0.454731
ENST00000636397.1	AC068580.4	25.5741	-3.92989	1.69452	-2.31917	0.0203856	0.455229
ENST00000528610.5	EEF1D	134.144	4.30539	1.85662	2.31894	0.0203982	0.455229
ENST00000319980.10	IFT88	115.352	0.501934	0.216568	2.31767	0.0204671	0.455902
ENST00000259746.13	TMEM63B	264.29	0.392507	0.169365	2.31752	0.0204755	0.455902
ENST00000435041.3	UBE2J1	2328.18	0.120332	0.0519266	2.31735	0.0204845	0.455902
ENST00000354230.7	MCM7	5.37325	1.81447	0.783269	2.31654	0.0205291	0.456476
ENST00000639169.1	GCSH	2.60158	-2.58715	1.1171	-2.31595	0.0205611	0.456773
ENST00000280155.4	ADRA2A	21.1391	-0.967305	0.417798	-2.31525	0.0205994	0.457206
ENST00000673817.1	ARNTL	74.9831	0.850105	0.367349	2.31416	0.0206589	0.458109
ENST00000380913.8	SHROOM2	165.736	-0.376419	0.162718	-2.31333	0.0207047	0.458706
ENST00000527636.6	TEAD1	1754.97	-1.80198	0.77927	-2.31239	0.0207561	0.459387
ENST00000356860.8	CACNA2D1	1022.31	-0.687216	0.297228	-2.31208	0.0207732	0.459387
ENST00000394439.5	PDE5A	2022.14	-0.520424	0.225202	-2.31092	0.0208374	0.460099
ENST00000371269.9	DHCR24	3328.06	-0.283264	0.122582	-2.31081	0.0208432	0.460099
ENST00000644138.1	CTNNB1	566.263	2.25395	0.975567	2.3104	0.0208661	0.460189
ENST00000380338.9	MLLT3	785.052	0.231702	0.100321	2.30961	0.0209099	0.460363
ENST00000555220.5	ZBTB25	15.7429	-1.05347	0.456131	-2.30957	0.0209118	0.460363
ENST00000528887.1	AP003068.1	4.34763	4.15314	1.79895	2.30864	0.0209634	0.460747
ENST00000527078.5	SLC44A3	46.1265	-3.11539	1.34949	-2.30858	0.0209671	0.460747
ENST00000334553.10	KLC1	41.8495	2.41572	1.04676	2.30781	0.0210097	0.461191
ENST00000341865.9	C6orf132	48.1959	-0.631705	0.273758	-2.30753	0.0210252	0.461191
ENST00000284320.6	TOMM70	1987.6	0.154491	0.0669708	2.30684	0.0210636	0.461616
ENST00000658780.1	KIAA1549L	199.257	-0.871117	0.377739	-2.30613	0.0211031	0.462068
ENST00000327773.7	GAS6	4319.8	-0.352584	0.152952	-2.30519	0.0211561	0.462766
ENST00000358901.11	VCP	5257.6	-0.277593	0.120448	-2.30467	0.021185	0.462766
ENST00000394236.9	PROS1	329.533	0.660655	0.286706	2.30429	0.0212063	0.462766
ENST00000560869.5	AC108449.2	226.186	-0.403529	0.175127	-2.30421	0.0212111	0.462766
ENST00000358572.10	TMA16	309.111	0.857618	0.372258	2.30383	0.0212323	0.462815
ENST00000501169.3	DPH6-DT	23.5685	-0.859397	0.373147	-2.3031	0.021273	0.463288
ENST00000344862.9	PUS7L	960.788	-0.416629	0.180946	-2.3025	0.0213071	0.463615
ENST00000371732.10	CARD9	40.9516	0.848558	0.368772	2.30104	0.0213893	0.46476
ENST00000318037.3	RNF168	627.528	0.352477	0.153192	2.30089	0.0213979	0.46476
ENST00000603864.5	SMAGP	79.2869	3.69457	1.60755	2.29826	0.021547	0.467581
ENST00000611779.4	TAX1BP3	11.4316	4.15873	1.81028	2.29728	0.0216027	0.468264
ENST00000392876.8	NT5DC3	263.078	0.495385	0.21575	2.29611	0.0216696	0.468264
ENST00000371671.9	RABL6	110.422	2.47608	1.07842	2.29603	0.021674	0.468264
ENST00000394566.5	SLFN11	547.512	0.265993	0.11586	2.29582	0.0216862	0.468264
ENST00000521775.6	AC124242.1	6.50844	-2.7828	1.21216	-2.29572	0.0216917	0.468264
ENST00000329153.10	PLEKHH1	3.01426	-2.70734	1.17932	-2.29569	0.0216939	0.468264
ENST00000332707.10	XPOT	8249.73	0.407699	0.177627	2.29525	0.0217188	0.468275
ENST00000373930.4	MEGF9	227.351	-0.355533	0.154925	-2.29487	0.0217406	0.468275
ENST00000598322.1	AC022150.4	77.8695	-0.506678	0.220806	-2.29467	0.0217521	0.468275
ENST00000336798.11	SDC3	451.593	-0.417563	0.182008	-2.2942	0.0217792	0.468445
ENST00000210444.6	NANS	609.794	0.309567	0.134979	2.29344	0.0218225	0.468962
ENST00000270502.7	TIMM29	146.318	0.378964	0.165285	2.29279	0.0218603	0.469361
ENST00000338965.9	NCR3LG1	240.454	0.550541	0.240331	2.29076	0.0219771	0.471453
ENST00000395812.6	CAST	169.768	2.77659	1.2132	2.28866	0.0220992	0.473654
ENST00000622495.4	CLTCL1	96.8308	-3.98298	1.74148	-2.28712	0.0221887	0.475155
ENST00000357877.7	SEMA4F	51.6277	-0.643556	0.281563	-2.28566	0.0222744	0.476285
ENST00000326266.13	THOC6	83.2661	0.849602	0.371727	2.28555	0.0222806	0.476285
ENST00000451813.6	TRPC4AP	244.289	3.50107	1.53295	2.28388	0.0223786	0.47796
ENST00000301904.4	SCARA3	512.964	-0.655271	0.286972	-2.28339	0.0224072	0.477993
ENST00000585156.5	PDE4DIP	54.8852	-2.22369	0.973941	-2.28319	0.0224194	0.477993
ENST00000605786.5	DYNC2LI1	183.817	1.2773	0.55983	2.2816	0.0225133	0.47918
ENST00000424760.5	PHTF2	58.6803	-2.48469	1.08902	-2.28158	0.0225144	0.47918
ENST00000560641.5	PBX1	88.1243	-3.78267	1.66102	-2.27731	0.0227676	0.48363
ENST00000318066.7	UBE2N	958.529	-1.2836	0.563707	-2.27707	0.0227822	0.48363
ENST00000370081.6	COX7A2	5.28886	-2.04583	0.898456	-2.27705	0.0227831	0.48363
ENST00000653353.1	LINC01354	10.7378	1.14454	0.502855	2.27609	0.0228407	0.48443
ENST00000531206.5	CDC27	4.4915	-2.36474	1.03941	-2.27507	0.0229015	0.48505
ENST00000660752.1	NNT	8.31808	-1.25199	0.550339	-2.27494	0.0229098	0.48505
ENST00000262096.13	ZDHHC2	1636.76	0.258294	0.113604	2.27365	0.0229872	0.485948
ENST00000645291.2	CFAP92	1.81326	-2.87867	1.26617	-2.27353	0.0229944	0.485948
ENST00000372899.5	UBR2	250.873	3.43096	1.50929	2.27323	0.0230121	0.485948
ENST00000521861.6	EIF3H	1579.55	-0.255585	0.112552	-2.27082	0.0231577	0.488421
ENST00000273320.7	ZKSCAN7	82.5391	0.423989	0.186738	2.2705	0.023177	0.488421
ENST00000197268.13	FAM234B	165.432	0.557974	0.245771	2.2703	0.0231894	0.488421
ENST00000374518.6	BMS1	847.973	0.173509	0.0764378	2.26993	0.0232117	0.488469
ENST00000323443.6	LRRC57	316.168	0.337486	0.148719	2.26928	0.0232511	0.488876
ENST00000322475.12	EIF2S3B	14.314	-1.16591	0.513897	-2.26876	0.0232832	0.489128
ENST00000396053.9	RBM4	88.8673	0.462217	0.203769	2.26834	0.0233088	0.489244
ENST00000452404.6	NCBP2	30.6967	3.10012	1.36761	2.26682	0.0234011	0.490758
ENST00000433091.6	PON2	311.904	-3.14827	1.38914	-2.26635	0.02343	0.490926
ENST00000476134.1	MAPK8	87.8877	2.04117	0.900768	2.26603	0.0234494	0.490926
ENST00000336349.6	SPTY2D1	715.99	0.323768	0.142969	2.26461	0.0235366	0.492327
ENST00000277198.6	AOPEP	5.69312	-3.35988	1.48404	-2.26401	0.0235736	0.492677
ENST00000381920.8	METTL22	260.033	0.435358	0.192339	2.26349	0.0236053	0.492918
ENST00000585457.6	ASB16-AS1	19.0447	-0.867433	0.383302	-2.26305	0.0236324	0.493061
ENST00000381750.9	RCL1	35.1554	-0.608159	0.26894	-2.26132	0.0237395	0.494872
ENST00000404125.6	PSME4	2857.86	-0.286527	0.126799	-2.25969	0.0238402	0.496545
ENST00000631519.1	SMIM10L1	152.512	0.355051	0.157232	2.25813	0.0239375	0.498147
ENST00000261489.6	TSC22D1	335.847	0.677571	0.300196	2.2571	0.0240019	0.499059
ENST00000326094.4	ISCA1	1.15546	-3.1717	1.4055	-2.25664	0.0240305	NA
ENST00000622535.1	AC121338.2	1.15546	-3.1717	1.4055	-2.25664	0.0240305	NA
ENST00000648127.1	SNHG12	42.6087	1.42779	0.632719	2.2566	0.0240333	0.499286
ENST00000502773.6	PDGFC	3702.21	0.250474	0.111114	2.25421	0.024183	0.501968
ENST00000372102.3	TP53RK	484.131	0.256731	0.113919	2.25363	0.0242194	0.502027
ENST00000279394.7	TAOK2	182.426	0.717093	0.318212	2.25351	0.0242271	0.502027
ENST00000352203.8	AP2S1	50.9656	-1.01791	0.451959	-2.25221	0.0243088	0.503291
ENST00000258390.11	DOCK10	1.81293	2.85855	1.2698	2.25119	0.0243738	0.504208
ENST00000559026.1	AC092757.2	1.16132	-3.17203	1.40954	-2.2504	0.0244235	NA
ENST00000588599.5	SNRPD2	1.16132	-3.17203	1.40954	-2.2504	0.0244235	NA
ENST00000384413.1	Y_RNA	152.119	-0.509277	0.226449	-2.24897	0.0245145	0.505947
ENST00000424848.2	LRP12	11.9075	-4.13539	1.83884	-2.24891	0.024518	0.505947
ENST00000222726.4	HOXA5	79.438	-0.556559	0.247506	-2.24867	0.0245332	0.505947
ENST00000666480.1	CHROMR	105.463	1.18907	0.528906	2.24818	0.024565	0.505947
ENST00000619452.1	AC007546.1	1.77011	-3.5302	1.57028	-2.24814	0.0245671	0.505947
ENST00000565383.5	TRAF7	4.8352	-3.17775	1.41365	-2.2479	0.0245825	0.505947
ENST00000314332.5	H2BC4	397.228	-3.54036	1.57609	-2.24629	0.0246851	0.50763
ENST00000357166.11	ZDHHC9	296.33	0.338604	0.150922	2.24357	0.0248599	0.510793
ENST00000266984.9	CCDC65	4.88667	-1.92123	0.856544	-2.243	0.0248967	0.511117
ENST00000391196.1	SNORD86	4.7962	1.85656	0.827976	2.24229	0.0249428	0.511633
ENST00000311852.11	MMP14	5525.38	0.509529	0.227272	2.24193	0.0249657	0.511672
ENST00000398246.8	LONRF1	314.828	0.401007	0.178975	2.24058	0.0250533	0.513034
ENST00000643116.2	KP420441.4	1532.59	0.196258	0.0876239	2.23977	0.0251057	0.513675
ENST00000310775.11	STAG3L5P-PVRIG2P-PILRB	202.079	-0.810352	0.362079	-2.23805	0.0252176	0.515532
ENST00000458549.7	TMEM64	762.848	0.284648	0.127215	2.23753	0.0252518	0.515797
ENST00000441174.8	TBRG1	650.252	0.466489	0.208828	2.23385	0.0254931	0.519699
ENST00000304222.2	ADORA2B	121.76	-0.436519	0.195415	-2.2338	0.025496	0.519699
ENST00000374279.4	UGCG	3493.04	0.199658	0.089387	2.23364	0.0255068	0.519699
ENST00000373020.9	TSPAN6	967.172	0.302981	0.135715	2.23248	0.0255831	0.520642
ENST00000261884.8	TRIP4	262.787	0.31409	0.140703	2.23229	0.0255959	0.520642
ENST00000469796.7	ACSL4	2257.08	-0.537946	0.241283	-2.22953	0.0257789	0.523611
ENST00000647433.1	DIAPH1	537.49	-0.539147	0.241831	-2.22944	0.0257848	0.523611
ENST00000376854.6	C9orf40	132.748	-0.376361	0.16889	-2.22843	0.0258517	0.524532
ENST00000563500.5	PML	20.0922	2.92783	1.31428	2.22771	0.0259001	0.52504
ENST00000372159.7	DDX31	127.762	0.505845	0.2271	2.22741	0.0259199	0.52504
ENST00000406438.5	SMCR8	354.187	-0.380665	0.171002	-2.22608	0.0260086	0.526399
ENST00000670269.1	ALG1L9P	2.45288	-2.49344	1.12053	-2.22523	0.0260659	0.527025
ENST00000281834.4	TNFSF4	1509.53	2.18768	0.983236	2.22498	0.0260828	0.527025
ENST00000275072.5	PM20D2	134.743	-0.848937	0.381647	-2.2244	0.0261213	0.527365
ENST00000658996.1	GEMIN7-AS1	21.4327	2.44149	1.09852	2.22253	0.0262476	0.529475
ENST00000396020.7	RPS29	214.108	0.376972	0.169765	2.22056	0.0263807	0.53172
ENST00000464889.6	PCMT1	225.397	-2.1182	0.954461	-2.21927	0.0264685	0.53262
ENST00000541179.5	POSTN	8744.59	-2.3757	1.07061	-2.21901	0.0264862	0.53262
ENST00000374403.4	KIF4A	181.168	-0.937668	0.422575	-2.21894	0.026491	0.53262
ENST00000361362.7	ZFP2	7.98527	-1.74644	0.787304	-2.21825	0.0265377	0.533118
ENST00000576436.5	RPS15A	396.837	2.99156	1.34882	2.2179	0.0265616	0.533158
ENST00000373585.8	DDX50	103.239	0.783679	0.35342	2.21742	0.0265947	0.533384
ENST00000368662.10	TUBE1	410.467	0.278135	0.125485	2.21649	0.0266583	0.533469
ENST00000335681.10	NPAS2	43.8587	0.791177	0.357062	2.2158	0.0267053	0.533469
ENST00000439211.7	DHFR	230.433	-0.651151	0.293971	-2.21502	0.0267586	0.533469
ENST00000503780.6	CEP44	201.679	-0.515611	0.23278	-2.21501	0.0267591	0.533469
ENST00000619697.1	AC073508.3	32.036	0.996599	0.449951	2.21491	0.0267664	0.533469
ENST00000477305.5	HTD2	20.4599	4.21771	1.9048	2.21426	0.0268112	0.533469
ENST00000582113.1	TMEM97	4.12638	-2.25443	1.0183	-2.21391	0.0268349	0.533469
ENST00000269221.8	RMC1	124.239	0.905576	0.409052	2.21384	0.0268399	0.533469
ENST00000341068.8	ANAPC1	705.937	-0.172751	0.0780456	-2.21346	0.026866	0.533469
ENST00000220597.4	PAG1	582.903	-0.552715	0.249714	-2.21339	0.0268705	0.533469
ENST00000338895.7	DFFB	53.783	-0.639174	0.288789	-2.21329	0.0268774	0.533469
ENST00000613024.2	EPOP	7.218	-1.24483	0.562458	-2.2132	0.0268838	0.533469
ENST00000621654.2	EPOP	7.218	-1.24483	0.562458	-2.2132	0.0268838	0.533469
ENST00000367481.7	STXBP5	1270.4	-0.541273	0.244779	-2.21127	0.0270171	0.53484
ENST00000357681.9	DLG1	3358.46	-0.393271	0.177863	-2.21108	0.0270302	0.53484
ENST00000555520.1	LINC01578	65.3745	-3.64992	1.65075	-2.21107	0.0270311	0.53484
ENST00000392452.3	MB21D2	668.329	-0.242254	0.109618	-2.20999	0.0271059	0.53484
ENST00000305476.10	SEMA4C	151.448	0.46501	0.210413	2.20999	0.0271061	0.53484
ENST00000606966.1	AC006273.1	2.65133	-2.56352	1.16002	-2.20989	0.0271129	0.53484
ENST00000229633.7	HINT3	939.521	0.382412	0.17306	2.20971	0.0271252	0.53484
ENST00000668373.1	SHROOM3-AS1	19.9128	2.41146	1.09133	2.20966	0.0271286	0.53484
ENST00000507187.2	NAAA	25.1412	1.34631	0.609515	2.20882	0.0271869	0.535556
ENST00000243298.3	RAB9B	66.8066	0.552772	0.250502	2.20666	0.0273377	0.538091
ENST00000518942.2	AC064807.1	35.3002	-0.628193	0.284761	-2.20603	0.0273816	0.53852
ENST00000274364.11	IQGAP2	14.929	1.52279	0.690587	2.20507	0.0274495	0.53942
ENST00000394434.7	LARS1	2895.22	0.351326	0.159395	2.20413	0.0275153	0.540277
ENST00000329759.6	FAM43A	1649.93	0.456616	0.207307	2.20261	0.0276225	0.541944
ENST00000505472.5	SEC31A	1064.24	4.16169	1.88988	2.20209	0.0276586	0.542215
ENST00000261381.7	XYLT1	103.711	0.45638	0.207385	2.20064	0.0277614	0.543794
ENST00000505019.5	ZGRF1	93.6207	-0.458682	0.20855	-2.19939	0.0278505	0.544738
ENST00000556443.5	MAX	1.84343	3.52035	1.60065	2.19933	0.0278544	0.544738
ENST00000586397.5	PRKAR1A	473.317	-2.77314	1.26129	-2.19865	0.0279026	0.544952
ENST00000249071.11	RAC2	90.2535	-0.65907	0.299775	-2.19855	0.0279101	0.544952
ENST00000341754.8	RAD1	1.43258	3.33125	1.5153	2.19841	0.0279198	NA
ENST00000313349.3	SERTAD2	181.479	-0.639628	0.29132	-2.19562	0.0281192	0.548595
ENST00000347055.4	KRCC1	852.774	-0.258999	0.118012	-2.19469	0.0281861	0.548734
ENST00000393094.7	CUL5	2051.15	0.226593	0.103247	2.19466	0.0281881	0.548734
ENST00000260128.8	SULF1	4494.74	0.796495	0.362938	2.19458	0.0281939	0.548734
ENST00000369939.8	ELAPOR1	12.166	-1.06259	0.484351	-2.19384	0.0282469	0.549325
ENST00000623921.1	AC009090.4	1.47271	-3.35373	1.52971	-2.1924	0.0283507	NA
ENST00000568653.7	RPGRIP1L	59.9544	0.510362	0.233012	2.19028	0.0285037	0.553877
ENST00000303004.5	CEBPB	385.703	0.293954	0.134295	2.18886	0.0286068	0.555437
ENST00000415914.4	THAP5	639.271	-0.295202	0.13489	-2.18847	0.0286352	0.555546
ENST00000344548.7	CDC42	994.102	-2.80755	1.28368	-2.18711	0.0287343	0.556318
ENST00000666945.1	ENTPD1-AS1	13.3584	2.44802	1.11933	2.18704	0.0287395	0.556318
ENST00000427716.6	FGD4	25.3794	-1.39941	0.639914	-2.18686	0.0287524	0.556318
ENST00000205194.5	NAT14	258.612	0.526729	0.240882	2.18667	0.0287664	0.556318
ENST00000612793.1	AC084876.1	2.80046	3.27415	1.49757	2.18631	0.028793	0.556391
ENST00000358701.10	QSOX2	263.362	0.58165	0.266304	2.18416	0.0289506	0.558993
ENST00000375991.9	ISCA1	600.576	0.325965	0.149275	2.18365	0.0289881	0.559273
ENST00000640252.2	PIGN	426.269	-0.512398	0.234699	-2.18321	0.0290201	0.559448
ENST00000630737.1	Z69713.1	6.73513	-1.26086	0.577774	-2.18227	0.0290897	0.560346
ENST00000395323.9	LBH	1941.42	-0.4452	0.204057	-2.18174	0.0291284	0.560647
ENST00000265340.12	PITX1	27.1517	-0.974438	0.446799	-2.18093	0.0291883	0.560953
ENST00000571584.1	COX11	35.7572	0.795394	0.364708	2.18091	0.0291904	0.560953
ENST00000397618.7	UGGT2	23.9904	1.00027	0.458735	2.18049	0.029221	0.561099
ENST00000278949.9	MPZL3	2.56612	2.53341	1.16249	2.1793	0.0293094	0.562352
ENST00000455146.8	COG6	699.738	0.653659	0.30006	2.17843	0.0293743	0.563154
ENST00000235332.6	MIIP	139.54	-0.38512	0.17684	-2.1778	0.0294212	0.56361
ENST00000258399.8	USP37	385.526	0.295445	0.13571	2.17703	0.0294783	0.564259
ENST00000375734.6	RND3	14040.5	-0.198298	0.0911094	-2.17648	0.0295192	0.564598
ENST00000341189.8	ARMCX3	370.526	-3.80529	1.74919	-2.17546	0.0295958	0.565619
ENST00000368842.10	LHPP	65.0923	0.463023	0.213003	2.17379	0.0297211	0.567392
ENST00000541887.5	ANAPC5	624.5	3.13666	1.44319	2.17342	0.0297489	0.567392
ENST00000249356.4	DNAJB9	962.062	0.269985	0.124231	2.17325	0.0297615	0.567392
ENST00000370801.8	ZZZ3	1748.7	0.247027	0.113681	2.17298	0.0297818	0.567392
ENST00000515279.6	GSTCD	184.956	-0.375854	0.173048	-2.17197	0.0298582	0.568403
ENST00000599564.5	GRAMD1A	68.9328	0.92215	0.425036	2.16958	0.0300387	0.571392
ENST00000298198.5	PGM2L1	799.488	0.623764	0.287568	2.1691	0.0300751	0.571627
ENST00000508802.5	TBC1D1	12.2909	-2.47463	1.14102	-2.1688	0.030098	0.571627
ENST00000669005.1	RAB30-DT	3.61413	-2.4535	1.13214	-2.16714	0.0302244	0.573331
ENST00000318386.8	SLBP	7.27368	-3.51817	1.62352	-2.167	0.0302348	0.573331
ENST00000347519.11	RPL36	196.577	-0.275732	0.127277	-2.16639	0.030281	0.573761
ENST00000355105.8	GPBP1L1	1370.41	0.233758	0.107922	2.166	0.0303112	0.573885
ENST00000586869.5	NLE1	194.587	0.394483	0.182154	2.16566	0.0303369	0.573927
ENST00000540618.5	EYA3	23.2105	1.27085	0.58699	2.16502	0.030386	0.573948
ENST00000638437.1	FTX	185.787	1.25773	0.581011	2.16473	0.0304085	0.573948
ENST00000612339.4	TMEM106A	62.7293	0.492536	0.227528	2.16472	0.0304088	0.573948
ENST00000340309.7	UBE2V1	2.8113	-2.62378	1.21226	-2.16438	0.0304355	0.574007
ENST00000381401.11	SLC25A6	1937.87	0.4035	0.186591	2.16248	0.0305812	0.575904
ENST00000525239.5	WDR74	2274	-3.55496	1.64401	-2.16237	0.0305896	0.575904
ENST00000437232.5	VIM-AS1	16.1663	1.03301	0.477772	2.16214	0.030607	0.575904
ENST00000550765.6	FKBP11	623.951	0.399685	0.184945	2.1611	0.0306878	0.576977
ENST00000611191.1	AL133445.2	1.2983	-3.23669	1.49863	-2.15976	0.0307914	NA
ENST00000638749.1	IQCJ-SCHIP1	300.615	0.80899	0.374717	2.15893	0.0308553	0.57968
ENST00000393381.3	HPF1	232.08	-0.389114	0.180287	-2.1583	0.0309049	0.580163
ENST00000367405.4	NUP43	1696.28	0.297591	0.137977	2.15681	0.0310206	0.581887
ENST00000568589.5	DCTN5	80.9144	1.36987	0.635338	2.15613	0.0310735	0.582431
ENST00000637342.1	TPCN2	1.49522	3.33572	1.54749	2.15557	0.0311175	NA
ENST00000515673.7	RNF150	747.021	-0.62591	0.290647	-2.1535	0.031279	0.585832
ENST00000321765.10	SPAG5	288.675	-1.09793	0.510122	-2.15228	0.0313752	0.586741
ENST00000558320.5	ZNF280D	36.7469	3.07039	1.42658	2.15227	0.0313758	0.586741
ENST00000536769.1	UBC	2361.01	3.124	1.4518	2.1518	0.0314129	0.586985
ENST00000382533.8	SAP18	64.1844	-3.47216	1.61479	-2.15022	0.0315379	0.588379
ENST00000356357.9	AREL1	459.834	-0.444507	0.206729	-2.15019	0.0315405	0.588379
ENST00000372839.7	YWHAB	303.073	-2.52154	1.17284	-2.14994	0.03156	0.588379
ENST00000622602.2	SMIM10L1	209.623	0.298959	0.139093	2.14935	0.0316067	0.588799
ENST00000613823.1	UGP2	1.31002	-3.23689	1.50612	-2.14916	0.0316214	NA
ENST00000332674.9	MXI1	436.774	0.727993	0.338832	2.14853	0.0316713	0.589552
ENST00000361729.3	E2F2	14.1621	-1.05336	0.490414	-2.1479	0.0317219	0.590041
ENST00000263265.11	PLEKHA4	220.651	0.328625	0.153053	2.14712	0.0317834	0.590245
ENST00000339154.6	NUDT6	5.44351	-2.93913	1.36904	-2.14685	0.031805	0.590245
ENST00000652203.1	NR1H2	223.513	4.22344	1.96736	2.14675	0.031813	0.590245
ENST00000261015.4	CHRNA1	581.704	0.219384	0.102217	2.14626	0.0318522	0.590245
ENST00000381434.7	IL33	24.3833	1.45847	0.679576	2.14614	0.0318617	0.590245
ENST00000633819.1	KANSL1	13.4935	-3.27153	1.52453	-2.14593	0.0318783	0.590245
ENST00000418390.6	ELOA	487.2	-0.309903	0.144446	-2.14546	0.0319158	0.590254
ENST00000333055.8	MGAT1	142.539	0.369278	0.172155	2.14503	0.0319501	0.590254
ENST00000412997.6	SGO1	50.2977	-1.08053	0.503739	-2.14502	0.0319515	0.590254
ENST00000378595.7	AFF4	101.648	-4.21237	1.96477	-2.14395	0.0320369	0.591383
ENST00000227507.3	CCND1	8474.08	-0.291653	0.136063	-2.14351	0.0320721	0.591585
ENST00000378700.8	ID4	44.3484	0.658386	0.307278	2.14264	0.0321421	0.592215
ENST00000559471.6	SECISBP2L	1694.32	0.301801	0.140865	2.14248	0.0321549	0.592215
ENST00000257724.7	RINT1	1103.77	-0.560815	0.261835	-2.14186	0.0322043	0.592677
ENST00000329970.8	GTF3C6	468.337	0.249695	0.116688	2.13986	0.0323661	0.594165
ENST00000434526.7	AL022326.1	620.323	2.88978	1.35052	2.13975	0.0323747	0.594165
ENST00000544053.5	EMP1	19.0492	1.96754	0.919536	2.13971	0.0323781	0.594165
ENST00000425583.6	OCIAD1	22.2975	2.57535	1.20385	2.13926	0.0324147	0.594165
ENST00000458128.3	PGAM4	622.555	-0.326919	0.152833	-2.13906	0.0324307	0.594165
ENST00000309733.6	FAM241A	104.024	0.58662	0.274296	2.13864	0.0324647	0.594165
ENST00000317114.2	DLGAP1-AS1	33.4216	0.635107	0.297022	2.13825	0.0324965	0.594165
ENST00000359930.8	SULF2	24.8225	-0.93968	0.439525	-2.13794	0.0325214	0.594165
ENST00000396973.8	PCK2	30.8673	2.69464	1.26045	2.13784	0.0325298	0.594165
ENST00000432648.8	AKIRIN1	1267.43	0.243714	0.114015	2.13756	0.0325526	0.594165
ENST00000263245.10	ARFGAP3	1645.08	0.201612	0.0943283	2.13734	0.03257	0.594165
ENST00000425853.5	KIF9	11.0003	3.48181	1.62911	2.13725	0.0325781	0.594165
ENST00000652605.1	UPRT	7.87639	3.84584	1.80023	2.13631	0.0326545	0.59477
ENST00000360380.7	STIL	185.5	-0.77281	0.361762	-2.13624	0.0326601	0.59477
ENST00000405763.7	YY1AP1	46.9643	2.4757	1.15926	2.13559	0.0327128	0.595286
ENST00000360351.8	MAP2	32.4475	0.866297	0.405749	2.13505	0.0327566	0.595636
ENST00000300714.7	TEPSIN	22.9675	-0.809825	0.379509	-2.13388	0.0328528	0.596941
ENST00000613434.4	YME1L1	333.704	1.87571	0.879369	2.13302	0.032923	0.59777
ENST00000436205.2	SNHG32	4.48682	-2.00873	0.942111	-2.13216	0.0329937	0.598607
ENST00000379108.1	KCTD4	15.1251	-1.04525	0.490308	-2.13182	0.0330214	0.598663
ENST00000551676.5	PPP1CC	88.9195	1.67237	0.785556	2.1289	0.0332623	0.602541
ENST00000319332.10	P3H2	59.159	1.01514	0.476899	2.12863	0.0332848	0.602541
ENST00000393164.6	ATP2B1	70.1922	-3.8102	1.79046	-2.12806	0.0333324	0.602716
ENST00000392676.8	ABCA5	71.2972	0.790963	0.371708	2.12792	0.0333439	0.602716
ENST00000571975.1	AC020978.7	97.2138	0.578813	0.272228	2.12621	0.0334861	0.604556
ENST00000372310.7	AIF1L	262.472	0.356356	0.16761	2.12609	0.0334954	0.604556
ENST00000279907.12	UHRF1BP1L	1104.81	0.281328	0.132417	2.12456	0.0336235	0.605812
ENST00000641261.2	LINC02228	19.4457	0.748562	0.352401	2.12418	0.0336553	0.605812
ENST00000407997.4	APOBEC3G	26.4512	-0.80664	0.37979	-2.12391	0.0336776	0.605812
ENST00000281589.4	PABPC3	182.628	0.264215	0.124403	2.12386	0.0336819	0.605812
ENST00000408953.4	ZBED8	185.355	0.32598	0.153502	2.12362	0.0337017	0.605812
ENST00000379611.10	CCDC112	180.391	0.531787	0.250433	2.12347	0.0337143	0.605812
ENST00000525876.1	SERPINH1	5875.01	0.598008	0.281884	2.12146	0.0338828	0.608391
ENST00000322940.11	ABITRAM	205.295	-0.39683	0.1871	-2.12096	0.0339254	0.608707
ENST00000360586.8	WDHD1	236.198	-0.532227	0.251172	-2.11898	0.0340924	0.610913
ENST00000324439.9	RCHY1	231.947	0.307449	0.145098	2.1189	0.0340985	0.610913
ENST00000590393.1	MFSD11	9.67208	-1.29028	0.609049	-2.11852	0.0341311	0.611048
ENST00000338745.11	SATB1	60.236	0.870303	0.410878	2.11815	0.0341621	0.611152
ENST00000448876.5	MAP3K13	51.7878	2.28322	1.07845	2.11712	0.0342497	0.611865
ENST00000649796.2	GNAI1	996.044	0.301622	0.14247	2.11709	0.0342522	0.611865
ENST00000259229.7	CCDC115	293.458	-0.246013	0.116228	-2.11664	0.0342901	0.612094
ENST00000327347.10	SEPHS1	515.77	-0.174723	0.0825805	-2.11579	0.0343626	0.612806
ENST00000366639.9	TSNAX	1410.48	0.174655	0.0825825	2.11492	0.0344367	0.612806
ENST00000591022.6	PLEKHH3	81.0259	0.419108	0.198178	2.11481	0.0344463	0.612806
ENST00000360814.8	GLT8D2	1166.8	0.318589	0.150659	2.11463	0.0344613	0.612806
ENST00000397238.7	AGAP3	351.341	0.478337	0.226205	2.11462	0.0344623	0.612806
ENST00000357628.8	POT1	79.5186	1.75605	0.830519	2.1144	0.0344811	0.612806
ENST00000162749.7	TNFRSF1A	419.22	-0.326175	0.154325	-2.11356	0.0345527	0.613632
ENST00000320431.8	AMIGO3	19.5405	2.60029	1.23104	2.11228	0.0346628	0.615139
ENST00000555686.1	FOS	21.2991	-3.04572	1.44237	-2.1116	0.0347207	0.615717
ENST00000418747.2	SLC25A25-AS1	22.4222	2.03612	0.964801	2.1104	0.0348235	0.616724
ENST00000396913.6	PHYH	185.506	-0.441514	0.209217	-2.11032	0.0348311	0.616724
ENST00000393399.6	PRCP	3.75714	-3.89055	1.84381	-2.11006	0.0348535	0.616724
ENST00000507434.1	TRIM52-AS1	5.28049	-2.00393	0.950117	-2.10914	0.0349328	0.617678
ENST00000310528.8	TRPV1	1025.77	0.265996	0.12622	2.1074	0.035083	0.619885
ENST00000329608.11	CSF1	89.1291	-0.429486	0.203941	-2.10593	0.0352107	0.621689
ENST00000309315.9	ZMIZ2	40.4466	-0.551714	0.262028	-2.10556	0.0352428	0.621806
ENST00000379262.8	SIRT5	12.9038	0.919046	0.436633	2.10485	0.0353047	0.622447
ENST00000316731.12	CCZ1B	924.407	0.250635	0.119167	2.10323	0.0354456	0.624461
ENST00000394142.7	CNPY3	34.0352	1.67632	0.797142	2.10292	0.0354731	0.624461
ENST00000373891.2	CHPF	37.5205	-1.33138	0.633192	-2.10266	0.0354959	0.624461
ENST00000510515.5	SEPTIN11	19.6003	-0.818119	0.389318	-2.10141	0.0356046	0.625392
ENST00000392002.7	TMEM91	4.75327	-2.41414	1.14901	-2.10106	0.0356358	0.625392
ENST00000340748.8	DNMT1	310.356	-0.749378	0.35669	-2.10092	0.0356479	0.625392
ENST00000253861.5	EXOC4	1147.08	0.250517	0.119259	2.10061	0.0356753	0.625392
ENST00000225831.4	CCL2	369.357	-0.526857	0.250829	-2.10047	0.0356877	0.625392
ENST00000334304.10	ADGRA3	802.518	-0.188735	0.0898634	-2.10025	0.0357071	0.625392
ENST00000607124.1	H2BC11	17.6503	-1.5183	0.723179	-2.09948	0.0357744	0.625392
ENST00000354886.6	SLC38A6	85.3636	-1.29223	0.61553	-2.09938	0.0357837	0.625392
ENST00000379198.5	B3GALT6	429.34	-0.260546	0.124116	-2.09921	0.0357986	0.625392
ENST00000391842.5	PTOV1	51.3379	2.61287	1.24474	2.09913	0.0358057	0.625392
ENST00000325795.7	ORMDL1	584.674	0.927525	0.44196	2.09866	0.0358466	0.625645
ENST00000589496.2	AC010733.1	37.9984	-0.886537	0.422486	-2.09838	0.0358716	0.625645
ENST00000426263.9	AL929288.1	1656.14	-0.403714	0.192456	-2.09769	0.0359321	0.626253
ENST00000590083.5	CBARP	24.0059	0.91531	0.436704	2.09595	0.0360865	0.628493
ENST00000400509.1	IER3	175.368	0.357633	0.170747	2.09453	0.0362131	0.630248
ENST00000439174.7	GNA13	3207.82	0.252272	0.120469	2.09407	0.0362534	0.630499
ENST00000577598.5	BRIP1	20.574	-1.46813	0.701472	-2.09292	0.0363561	0.631834
ENST00000294964.6	PKDCC	51.0014	0.518855	0.248061	2.09164	0.0364706	0.633371
ENST00000369872.4	SYPL2	92.4479	-0.567133	0.271224	-2.09102	0.0365264	0.633889
ENST00000311922.4	TRIB1	184.729	0.410641	0.196424	2.09058	0.0365659	0.634091
ENST00000359591.9	LRP10	2579.62	0.224886	0.107585	2.09031	0.0365902	0.634091
ENST00000434547.1	STK24-AS1	2.27852	2.35887	1.12936	2.08868	0.0367364	0.63572
ENST00000540972.5	PLEKHA5	2.27852	2.35887	1.12936	2.08868	0.0367364	0.63572
ENST00000336564.5	ZNF576	26.7808	0.846343	0.405309	2.08814	0.036785	0.635979
ENST00000573177.1	DLGAP1-AS2	28.2433	0.84632	0.40539	2.08767	0.0368278	0.635979
ENST00000581874.1	JPT1	54.0433	2.47205	1.18413	2.08765	0.0368297	0.635979
ENST00000407418.8	CBX6	1095.29	0.182546	0.0874774	2.08678	0.0369084	0.636885
ENST00000671323.1	ENTPD1-AS1	14.1864	2.32005	1.11221	2.08599	0.0369792	0.637655
ENST00000435224.3	ABTB2	13.0068	0.945084	0.453149	2.08559	0.0370156	0.637832
ENST00000279027.9	SLC13A3	17.3882	0.956165	0.45872	2.08442	0.0371222	0.638693
ENST00000424155.6	TMED3	146.776	0.448469	0.215209	2.08388	0.0371712	0.638693
ENST00000245787.9	INSIG2	217.959	-0.539241	0.258792	-2.08368	0.0371891	0.638693
ENST00000377191.5	XRN2	1901.06	0.159711	0.0766712	2.08306	0.0372459	0.638693
ENST00000519881.5	PTK2	20.3905	1.52315	0.731253	2.08293	0.0372573	0.638693
ENST00000530705.5	IL15RA	12935.3	0.579099	0.278023	2.08292	0.0372585	0.638693
ENST00000393810.5	SLC35B2	4.34192	3.53042	1.69499	2.08286	0.0372641	0.638693
ENST00000651588.1	CDKN2B-AS1	17.7619	0.803373	0.38578	2.08247	0.0372998	0.638693
ENST00000621776.4	POLQ	145.342	-0.827525	0.397438	-2.08215	0.0373288	0.638693
ENST00000381007.9	SGTB	974.969	0.260343	0.125039	2.08209	0.0373341	0.638693
ENST00000367651.4	CITED2	1691.39	0.206309	0.0990977	2.08187	0.0373542	0.638693
ENST00000550785.5	TPCN1	82.3754	0.493125	0.236972	2.08094	0.0374394	0.639444
ENST00000267484.10	RTN1	0.98962	-2.96405	1.4247	-2.08048	0.0374815	NA
ENST00000615146.1	AC034102.8	0.98962	-2.96405	1.4247	-2.08048	0.0374815	NA
ENST00000625973.1	AC019226.2	0.98962	-2.96405	1.4247	-2.08048	0.0374815	NA
ENST00000397641.8	MORC2	127.956	0.542303	0.260663	2.08047	0.037482	0.639444
ENST00000258083.3	PRADC1	284.947	-0.402883	0.193665	-2.08031	0.0374974	0.639444
ENST00000257527.8	FAM189A2	2528.22	-0.168196	0.0808539	-2.08024	0.0375031	0.639444
ENST00000359315.6	TPGS1	42.3974	0.710156	0.341433	2.07993	0.0375324	0.639495
ENST00000274255.11	SKP2	654.394	-0.420834	0.20252	-2.07799	0.0377106	0.641086
ENST00000307216.10	TMEM87A	47.2506	-1.83172	0.88156	-2.07782	0.0377261	0.641086
ENST00000377793.9	NAA40	158.642	-0.290944	0.140027	-2.07777	0.0377308	0.641086
ENST00000394901.7	DHRS13	6.48963	3.00621	1.44685	2.07776	0.0377311	0.641086
ENST00000497705.5	OXR1	17.1354	2.17387	1.04664	2.07699	0.0378023	0.641848
ENST00000498502.5	MBNL1	275.944	2.24811	1.08384	2.0742	0.0380603	0.645453
ENST00000297107.11	GALNT10	2398.31	-0.312287	0.150581	-2.07388	0.0380903	0.645453
ENST00000455537.7	KIF5A	14.916	1.48777	0.717577	2.07332	0.0381424	0.645453
ENST00000511848.1	FNIP1	5.14633	-2.24583	1.08337	-2.073	0.0381723	0.645453
ENST00000534585.5	MAF1	388.788	-1.68605	0.813485	-2.07263	0.0382072	0.645453
ENST00000399959.7	DDX3X	241.257	-2.68195	1.29405	-2.07251	0.0382175	0.645453
ENST00000544001.6	ITFG1	1.65903	2.70669	1.30615	2.07227	0.0382406	0.645453
ENST00000531107.5	IRAG1	6.64139	-3.71637	1.79341	-2.07223	0.0382436	0.645453
ENST00000398831.8	PPIL2	6.75321	-3.70459	1.78782	-2.07213	0.0382532	0.645453
ENST00000562409.1	AC009090.1	1.14103	-3.08663	1.49058	-2.07075	0.0383823	NA
ENST00000293894.4	SOX8	7.41607	1.26836	0.612567	2.07056	0.0383997	0.646857
ENST00000607978.1	AC027644.3	38.2856	0.67183	0.324485	2.07045	0.0384103	0.646857
ENST00000606963.1	AC100814.1	10.1213	-1.06464	0.51422	-2.07039	0.0384161	0.646857
ENST00000368989.6	PLEKHA1	13.5637	3.22631	1.55927	2.06912	0.0385347	0.647619
ENST00000261304.7	GALC	313.499	0.410343	0.198322	2.06908	0.0385388	0.647619
ENST00000231368.10	LNPEP	1374.59	-0.395004	0.19091	-2.06905	0.0385411	0.647619
ENST00000447750.7	GDI1	571.692	0.357661	0.172939	2.06813	0.0386278	0.647776
ENST00000379303.10	ACOT9	961.724	-0.347518	0.168036	-2.06812	0.0386288	0.647776
ENST00000340990.10	ADIPOR1	1725.63	0.330986	0.160043	2.0681	0.0386303	0.647776
ENST00000665871.1	SLC25A5-AS1	3.08716	-2.25468	1.09066	-2.06727	0.0387089	0.648647
ENST00000543656.2	RUSC1-AS1	2.50186	-2.43478	1.17811	-2.06667	0.038765	0.64914
ENST00000526870.1	NUP160	4.215	2.61063	1.26369	2.06587	0.0388404	0.649956
ENST00000402038.7	PARG	525.728	0.241653	0.117004	2.06534	0.038891	0.65025
ENST00000340857.3	H1-0	771.489	0.351605	0.170258	2.06512	0.0389114	0.65025
ENST00000606538.5	POLR2F	27.4997	2.68823	1.30227	2.06426	0.0389933	0.651173
ENST00000612892.4	GPR1	810.177	0.481141	0.233207	2.06315	0.0390983	0.652478
ENST00000559081.1	SRP14	29.5528	3.68321	1.78613	2.06212	0.0391963	0.653665
ENST00000256015.5	BTG1	722.525	0.288068	0.139789	2.06074	0.0393275	0.655269
ENST00000598249.6	SPTBN4	3.95416	-2.18439	1.0601	-2.06055	0.0393463	0.655269
ENST00000520984.5	ZNF706	5.33256	1.78709	0.867774	2.0594	0.0394559	0.656118
ENST00000326397.10	RWDD4	427.644	0.418824	0.203413	2.05898	0.0394958	0.656118
ENST00000392006.8	HNRNPUL1	554.203	-0.223555	0.10859	-2.0587	0.0395227	0.656118
ENST00000392403.8	ASH1L	1162.79	-0.445714	0.216515	-2.05858	0.0395342	0.656118
ENST00000638681.1	FTX	6.88227	-3.69873	1.7968	-2.05851	0.0395412	0.656118
ENST00000510408.5	ELF2	130.156	3.83734	1.86446	2.05815	0.0395756	0.656118
ENST00000629798.2	IFI27L1	2.30739	2.33507	1.13484	2.05762	0.0396265	0.656118
ENST00000299308.7	TMEM132B	89.7925	-0.697734	0.3391	-2.05761	0.039628	0.656118
ENST00000301463.9	SPRYD3	482.651	0.350262	0.170238	2.05748	0.0396398	0.656118
ENST00000370558.8	SH3GLB1	2623.72	-0.213456	0.103775	-2.05691	0.0396948	0.656582
ENST00000283365.13	DTNA	54.4472	0.926553	0.450606	2.05624	0.0397596	0.657207
ENST00000671136.1	SNHG14	2.28996	-3.04291	1.48036	-2.05553	0.039828	0.657891
ENST00000573553.5	PAM16	12.8123	-3.01193	1.46593	-2.05463	0.0399151	0.658883
ENST00000339594.9	BAZ1B	1718.99	-0.31856	0.155095	-2.05397	0.0399787	0.659486
ENST00000373758.5	REEP3	3326.61	0.201863	0.0983006	2.05353	0.0400216	0.659747
ENST00000539277.6	TMTC1	1115.86	0.612484	0.298398	2.05257	0.040114	0.660822
ENST00000508632.6	OCIAD2	87.7269	-0.629539	0.306946	-2.05097	0.0402694	0.662934
ENST00000298630.8	STK32C	16.9266	0.822857	0.401308	2.05044	0.0403215	0.663335
ENST00000303383.8	SHCBP1	290.669	-0.919721	0.448608	-2.05017	0.0403483	0.663335
ENST00000646441.1	EFNB2	257.553	-0.428083	0.208834	-2.04987	0.0403771	0.663362
ENST00000598895.5	ZNF548	5.71578	-2.92488	1.42732	-2.04921	0.0404417	0.663974
ENST00000422508.6	CD109	40.9385	-0.846609	0.413838	-2.04575	0.040781	0.668392
ENST00000462787.5	SMC4	1086.3	-0.540915	0.264449	-2.04544	0.0408112	0.668392
ENST00000393909.7	MRPL19	1370.33	0.142603	0.0697206	2.04535	0.0408202	0.668392
ENST00000261180.9	TRHDE	1388.46	-0.252317	0.123361	-2.04535	0.0408205	0.668392
ENST00000375471.5	PADI1	16.5954	-0.861012	0.421187	-2.04425	0.0409288	0.669715
ENST00000558888.2	AC103740.1	7.66412	-1.22333	0.598589	-2.0437	0.0409837	0.670162
ENST00000425626.1	BET1	15.9384	-1.92675	0.943195	-2.04279	0.0410736	0.671085
ENST00000314128.9	STAT2	1565.67	0.42235	0.206774	2.04257	0.0410952	0.671085
ENST00000609682.1	ZBTB11-AS1	73.9023	0.560991	0.274723	2.04202	0.0411493	0.671273
ENST00000243673.7	GPR83	3.13635	-2.67819	1.31186	-2.04152	0.0411989	0.671273
ENST00000222482.10	CPA4	199.196	0.809467	0.39655	2.04127	0.0412238	0.671273
ENST00000247226.13	PLEKHG3	99.1684	-0.38331	0.187792	-2.04114	0.0412371	0.671273
ENST00000238714.8	PAPOLG	228.53	0.479338	0.234847	2.04106	0.0412447	0.671273
ENST00000420910.6	LMLN	10.6365	1.25101	0.613152	2.0403	0.0413209	0.67152
ENST00000424120.5	AC114752.2	572.15	0.537605	0.263565	2.03975	0.0413755	0.67152
ENST00000580996.1	AC093484.2	3.98629	-2.13843	1.04845	-2.03962	0.0413886	0.67152
ENST00000355472.10	GRK6	261.588	-0.394905	0.193624	-2.03954	0.0413958	0.67152
ENST00000567598.1	HEXA-AS1	2.82542	-2.56543	1.25786	-2.03952	0.0413977	0.67152
ENST00000397062.8	NFE2L2	2005.09	-0.276348	0.135531	-2.039	0.04145	0.671902
ENST00000655005.1	AL360178.1	2.31108	-2.36016	1.15768	-2.0387	0.04148	0.671902
ENST00000502584.5	SEPTIN11	6135.31	-0.65353	0.320613	-2.03838	0.0415123	0.671902
ENST00000636449.1	MIR1244-2	183.829	-0.381456	0.187155	-2.03818	0.0415317	0.671902
ENST00000576409.5	ATPAF1	314.712	1.60187	0.786089	2.03777	0.0415727	0.67212
ENST00000553066.5	MYL6B	728.425	-0.486593	0.238834	-2.03737	0.0416133	0.672127
ENST00000648869.1	AL358472.6	74.6511	2.67569	1.3135	2.03707	0.0416429	0.672127
ENST00000665536.1	LINC01273	3.28408	2.308	1.13307	2.03694	0.041656	0.672127
ENST00000448120.7	TULP3	550.761	0.243505	0.119566	2.03658	0.0416921	0.672216
ENST00000525528.1	BDNF	298.534	-1.51091	0.742089	-2.03602	0.0417479	0.672216
ENST00000263317.9	NOX4	218.75	1.05091	0.516276	2.03555	0.0417953	0.672216
ENST00000306176.5	ZPLD1	13.2295	0.962733	0.472967	2.03552	0.0417986	0.672216
ENST00000663366.1	DUBR	1.51059	-3.28258	1.61276	-2.03537	0.0418132	NA
ENST00000512097.9	KCNN2	4.91457	-1.43176	0.703643	-2.03479	0.0418724	0.672216
ENST00000427999.6	NPIPA9	40.4319	0.744057	0.365684	2.0347	0.0418813	0.672216
ENST00000335756.9	CENPA	86.8308	-1.00739	0.495131	-2.0346	0.0418913	0.672216
ENST00000519077.4	TUG1	13.7224	-3.89276	1.91342	-2.03445	0.0419065	0.672216
ENST00000649896.1	AP000944.5	364.573	-0.380354	0.18696	-2.03441	0.0419099	0.672216
ENST00000229214.9	KRR1	1324.79	0.321696	0.158156	2.03404	0.0419474	0.672373
ENST00000362803.1	SNORD16	2.13905	2.24723	1.10515	2.0334	0.0420117	0.672961
ENST00000397358.7	HMBOX1	182.308	-0.379704	0.186761	-2.0331	0.0420427	0.673014
ENST00000251241.9	DHX40	1155.39	0.320774	0.157879	2.03176	0.0421776	0.67473
ENST00000216513.5	SIX4	440.223	0.332678	0.163767	2.03141	0.0422138	0.674867
ENST00000305988.5	ADRB2	8.81686	-1.69647	0.835283	-2.03101	0.0422541	0.675067
ENST00000369103.3	RGS10	96.2038	-0.945623	0.465952	-2.02944	0.0424131	0.677163
ENST00000309311.7	EEF2	30078.3	0.404268	0.199317	2.02827	0.0425325	0.678511
ENST00000607679.1	AL354872.1	1.48004	3.25879	1.60678	2.02815	0.0425452	NA
ENST00000370128.8	RTCA	470.143	0.180557	0.0890293	2.02807	0.0425533	0.678511
ENST00000312431.10	DST	83.0919	-0.442634	0.218395	-2.02676	0.042687	0.680198
ENST00000358788.10	MRPL19	1.84425	2.80137	1.38295	2.02566	0.0428	0.681553
ENST00000304685.8	RGL1	528.124	0.372892	0.184163	2.0248	0.0428882	0.682511
ENST00000496391.5	PRKRIP1	231.239	0.298257	0.147369	2.02388	0.0429825	0.682927
ENST00000521764.3	NACA2	165.908	0.344082	0.170014	2.02385	0.0429855	0.682927
ENST00000379046.6	NQO1	1540.56	-3.0929	1.52832	-2.02372	0.0429985	0.682927
ENST00000613314.1	PCDHGA12	62.2972	0.816425	0.403528	2.02322	0.0430504	0.682973
ENST00000379551.2	PRR16	4.43396	-1.7521	0.866026	-2.02315	0.0430575	0.682973
ENST00000296785.8	ANKRA2	294.259	0.266468	0.131734	2.02277	0.043097	0.683154
ENST00000370206.9	CNN3	5671.23	0.139367	0.0689176	2.02222	0.0431537	0.683609
ENST00000609923.6	SLC25A16	657.924	0.18221	0.0901448	2.02131	0.043248	0.684333
ENST00000369099.8	C1orf54	61.4783	-3.90938	1.93416	-2.02123	0.0432556	0.684333
ENST00000383768.7	ZCWPW2	19.0314	0.862294	0.426692	2.02088	0.0432921	0.684465
ENST00000371514.8	SCP2	1427.45	1.13105	0.559799	2.02045	0.0433364	0.684721
ENST00000510994.5	ANAPC13	954.529	0.397708	0.196922	2.01962	0.0434228	0.68539
ENST00000409246.5	RAD9B	2.93576	-2.17722	1.0781	-2.0195	0.0434351	0.68539
ENST00000263694.9	SNRNP40	396.547	-0.299465	0.148357	-2.01855	0.043534	0.686506
ENST00000260045.8	THAP12	788.136	-0.1671	0.0828081	-2.01792	0.0435994	0.686883
ENST00000492465.2	RPARP-AS1	5.87419	3.60253	1.78565	2.01749	0.0436439	0.686883
ENST00000425836.6	VEGFA	4.3583	1.99519	0.989043	2.01729	0.0436649	0.686883
ENST00000398752.11	ATP5F1A	7381.48	0.297033	0.147247	2.01724	0.0436707	0.686883
ENST00000356839.10	ACADVL	419.633	3.78704	1.87913	2.01532	0.0438716	0.689596
ENST00000230056.8	GMNN	149.839	-0.509352	0.252892	-2.01411	0.0439981	0.691139
ENST00000229239.10	GAPDH	5401.97	-1.78776	0.888017	-2.01321	0.044093	0.691423
ENST00000527879.2	EID3	21.8181	-0.818047	0.406345	-2.01318	0.0440956	0.691423
ENST00000329321.4	GPR39	30.7852	-1.4391	0.714943	-2.01289	0.0441258	0.691423
ENST00000545800.1	AP001453.3	18.7563	0.938158	0.466083	2.01286	0.0441297	0.691423
ENST00000396373.9	ETV6	246.633	-0.542152	0.269425	-2.01226	0.0441929	0.691968
ENST00000591214.5	SMAD2	56.4902	-1.97491	0.981831	-2.01146	0.0442773	0.692563
ENST00000561460.5	AC091045.1	9.57923	1.95433	0.971679	2.0113	0.0442943	0.692563
ENST00000370990.5	SERBP1	336.739	0.411621	0.204703	2.01082	0.0443442	0.692563
ENST00000361565.9	IPO9	1019.47	-0.207848	0.103365	-2.01082	0.0443447	0.692563
ENST00000544196.5	REXO2	7.14175	-1.52043	0.756246	-2.0105	0.044378	0.692638
ENST00000567067.1	AC233266.2	13.7027	-0.924579	0.459991	-2.01	0.0444316	0.692651
ENST00000331268.9	MORF4L1	545.005	2.51633	1.25199	2.00986	0.0444462	0.692651
ENST00000429436.7	MARK3	1034.68	0.352788	0.175544	2.00969	0.0444642	0.692651
ENST00000529230.6	CKAP5	2700.91	-0.135582	0.0674795	-2.00923	0.0445129	0.692913
ENST00000615671.2	GABPB1-IT1	85.8468	0.442594	0.220307	2.00899	0.0445379	0.692913
ENST00000609602.1	LINC00896	4.70518	-1.82812	0.910294	-2.00828	0.044614	0.693431
ENST00000316024.9	WRAP53	27.7005	-1.27153	0.633185	-2.00814	0.0446281	0.693431
ENST00000402630.5	MRTFA	7.64792	1.91009	0.951551	2.00735	0.0447126	0.6943
ENST00000352511.5	ACVR2B	69.0507	0.518382	0.258481	2.00549	0.0449107	0.696932
ENST00000624417.1	AC110285.6	4.18061	1.89748	0.946517	2.0047	0.0449951	0.697796
ENST00000610455.4	DEF8	1.33889	-3.17464	1.58384	-2.00439	0.0450278	NA
ENST00000310791.4	REP15	12.424	1.73629	0.866643	2.00347	0.0451273	0.699363
ENST00000410075.5	ZNF638	21.6176	0.649755	0.324359	2.0032	0.0451558	0.699363
ENST00000374768.1	PARD3	45.8702	1.94614	0.971755	2.0027	0.0452091	0.699363
ENST00000266508.14	AEBP2	408.846	-0.968751	0.483726	-2.00269	0.045211	0.699363
ENST00000380579.6	TRAPPC2	277.31	-0.417815	0.208689	-2.0021	0.0452742	0.699895
ENST00000409687.5	SAPCD2	88.4097	-0.896725	0.448002	-2.00161	0.045327	0.700268
ENST00000562706.5	TMX3	12.9975	-0.864462	0.432107	-2.00058	0.0454381	0.701034
ENST00000375915.4	FAM155A	585.978	0.362903	0.18142	2.00035	0.0454622	0.701034
ENST00000344351.5	CREM	29.9978	2.86323	1.43137	2.00035	0.045463	0.701034
ENST00000395076.9	PPM1A	711.015	0.236939	0.118472	1.99995	0.045506	0.701253
ENST00000358392.6	COL11A1	641.562	0.909784	0.455083	1.99916	0.0455912	0.702121
ENST00000379055.5	TPT1	146.433	1.93662	0.969187	1.99819	0.0456958	0.703288
ENST00000318801.8	SYNGR1	114.376	-0.456746	0.228613	-1.9979	0.0457271	0.703325
ENST00000625159.1	RN7SKP23	9.42353	-2.50553	1.25458	-1.9971	0.0458138	0.704214
ENST00000614549.4	SMAP2	153.148	-0.546715	0.27384	-1.99648	0.0458822	0.704821
ENST00000039989.9	TTC17	1245.82	0.443761	0.222432	1.99504	0.0460388	0.70678
ENST00000513973.6	PGM3	3246.12	0.288958	0.144882	1.99443	0.0461051	0.707352
ENST00000394144.9	TBC1D23	1731.2	0.220816	0.110756	1.99373	0.046182	0.707665
ENST00000396526.7	SNX6	2934.07	-0.482477	0.242018	-1.99356	0.0462007	0.707665
ENST00000295974.12	APBB2	1465.08	0.307695	0.154364	1.99331	0.0462271	0.707665
ENST00000394665.5	RPL34	1413.99	-2.11401	1.06062	-1.99318	0.0462418	0.707665
ENST00000561419.1	AL136295.4	8.30451	-2.77341	1.39168	-1.99284	0.0462786	0.707784
ENST00000407775.7	ZFPM2	99.1399	-0.512434	0.257234	-1.99209	0.0463612	0.708602
ENST00000392521.7	CIT	122.731	-0.846188	0.424906	-1.99147	0.0464288	0.709189
ENST00000392004.7	COL6A3	1325.41	0.961524	0.482968	1.99087	0.0464957	0.709319
ENST00000556985.5	JKAMP	62.9802	-3.85828	1.93851	-1.99033	0.046555	0.709319
ENST00000398004.4	SLC35E3	165.15	0.293605	0.147523	1.99023	0.0465654	0.709319
ENST00000329151.5	TMEM54	40.6736	-0.961409	0.483075	-1.99019	0.0465704	0.709319
ENST00000275053.8	MMS22L	218.142	-0.712658	0.358107	-1.99007	0.0465829	0.709319
ENST00000368865.9	BUB3	1499.38	-0.346523	0.174168	-1.98959	0.0466357	0.709679
ENST00000360240.10	MAP4	310.398	3.96468	1.99375	1.98856	0.0467501	0.710975
ENST00000398235.6	CHTF8	2.57649	2.47416	1.24485	1.98751	0.0468655	0.712285
ENST00000380087.6	RBBP7	891.114	1.85064	0.931739	1.98622	0.0470085	0.713628
ENST00000378426.5	CXorf38	277.17	0.269104	0.135491	1.98613	0.0470185	0.713628
ENST00000296506.8	SCRG1	67.8256	0.917279	0.46189	1.98592	0.0470418	0.713628
ENST00000595295.1	ZNF814	1.94257	2.84794	1.43472	1.98501	0.0471436	0.714334
ENST00000220429.12	GABPB1	208.997	1.68047	0.846593	1.98498	0.047147	0.714334
ENST00000645190.1	TRMU	163.632	-0.440109	0.221773	-1.9845	0.0471996	0.714413
ENST00000340281.9	ZNF326	158.104	0.325405	0.163982	1.9844	0.0472114	0.714413
ENST00000666517.1	MIR99AHG	16.4347	1.60663	0.809735	1.98414	0.0472402	0.714413
ENST00000633563.1	CARS1	9.65225	3.74181	1.88647	1.9835	0.0473114	0.715045
ENST00000601134.5	ZNF333	6.17421	1.25383	0.63233	1.98287	0.0473818	0.715406
ENST00000221462.9	PPP1R37	389.943	0.280679	0.14156	1.98276	0.047394	0.715406
ENST00000410111.7	IMMT	463.929	-0.24535	0.123933	-1.9797	0.0477368	0.720133
ENST00000546588.1	VPS29	1.47249	-2.57146	1.30025	-1.97766	0.0479667	NA
ENST00000273308.9	CNPY2	1250.78	0.25905	0.131015	1.97725	0.0480129	0.723606
ENST00000364113.1	SNORA3A	3.09339	1.78819	0.904555	1.97687	0.0480558	0.723606
ENST00000581647.5	ASPSCR1	34.183	0.800176	0.404769	1.97687	0.0480561	0.723606
ENST00000461821.1	ZBTB11	20.9756	-2.59205	1.31168	-1.97613	0.0481401	0.724158
ENST00000252599.9	COLGALT1	1527.16	0.216376	0.109513	1.97581	0.0481761	0.724158
ENST00000393292.7	ISY1	32.5282	-3.1848	1.61194	-1.97576	0.048182	0.724158
ENST00000430327.6	PLAC4	1.50127	-2.57392	1.30305	-1.97531	0.0482333	NA
ENST00000373371.8	SLC2A8	40.01	0.764362	0.387052	1.97483	0.0482874	0.724517
ENST00000368134.6	SAMD3	143.144	0.535057	0.270956	1.9747	0.0483019	0.724517
ENST00000603798.6	SMAGP	48.3131	-2.90064	1.46907	-1.97447	0.0483285	0.724517
ENST00000622926.1	AC041040.1	16.716	0.731997	0.370823	1.97398	0.048384	0.724517
ENST00000290341.8	IGF2BP1	282.962	-0.438289	0.222058	-1.97376	0.0484085	0.724517
ENST00000471874.2	RC3H2	16.5005	2.38802	1.2099	1.97373	0.0484129	0.724517
ENST00000370982.4	GNG12	10963.8	-0.130822	0.0662882	-1.97353	0.0484348	0.724517
ENST00000375213.8	MAP3K20	452.404	-0.981183	0.497207	-1.97339	0.0484513	0.724517
ENST00000506128.5	UIMC1	5.06987	3.48453	1.76594	1.97319	0.0484737	0.724517
ENST00000429592.1	IER3	181.192	0.327213	0.165969	1.97154	0.0486624	0.726695
ENST00000323441.10	HIF1A	372.498	-1.11453	0.56535	-1.97139	0.0486792	0.726695
ENST00000309383.6	BRSK1	68.6038	0.763558	0.387571	1.97011	0.0488256	0.728434
ENST00000340513.4	TPX2	503.488	-0.853206	0.433202	-1.96953	0.0488918	0.728976
ENST00000272433.7	SFXN5	121.873	-0.364614	0.185165	-1.96913	0.0489386	0.729131
ENST00000266970.9	CDK2	334.257	-0.759079	0.38553	-1.96892	0.0489621	0.729131
ENST00000526627.1	SMIM3	321.661	0.245299	0.124614	1.96848	0.0490129	0.729403
ENST00000558468.2	AL136295.5	242.385	0.795588	0.404213	1.96824	0.0490403	0.729403
ENST00000446599.1	IER3	181.642	0.354978	0.180415	1.96756	0.0491188	0.730118
ENST00000373210.4	AGO4	206.858	0.462752	0.235221	1.9673	0.0491483	0.730118
ENST00000348911.10	SBF1	105.543	-2.34216	1.19092	-1.96668	0.0492196	0.730372
ENST00000449247.6	IMMT	32.9834	-0.768931	0.390988	-1.96663	0.0492254	0.730372
ENST00000370476.10	CUTC	104.171	0.388568	0.19762	1.96624	0.0492708	0.730373
ENST00000366553.2	CHML	793.749	0.226314	0.115107	1.96611	0.0492855	0.730373
ENST00000354386.10	KIAA0586	1.16403	-3.04617	1.54974	-1.96561	0.0493441	NA
ENST00000389044.8	TRIP12	150.23	-0.728597	0.370816	-1.96485	0.0494319	0.731859
ENST00000621385.1	CCNB2	88.6646	-2.7041	1.37632	-1.96473	0.0494459	0.731859
ENST00000586040.5	SMAD2	325.268	-2.85649	1.45468	-1.96365	0.0495704	0.732312
ENST00000381309.7	KDM4C	220.886	0.327312	0.166691	1.96359	0.0495779	0.732312
ENST00000229314.10	GOLT1B	2504.6	0.211134	0.107532	1.96346	0.0495927	0.732312
ENST00000538183.7	SOD2	1018.45	0.18881	0.0961662	1.96337	0.0496028	0.732312
ENST00000523917.5	CNOT7	685.875	0.813848	0.414559	1.96317	0.0496268	0.732312
ENST00000404049.7	KDM5C	39.9462	-3.20181	1.63123	-1.96282	0.0496666	0.732454
ENST00000286070.10	RBM45	246.712	0.27255	0.138913	1.96202	0.0497603	0.733392
ENST00000395698.7	NCAPH2	34.2865	-3.81175	1.94437	-1.96041	0.0499483	0.735718
ENST00000354831.11	NRDC	1238.38	-1.47249	0.751928	-1.95828	0.0501971	0.738936
ENST00000504032.1	UGDH-AS1	7.48121	-1.27189	0.649702	-1.95765	0.050271	0.739334
ENST00000368685.6	SNAPIN	436.563	0.232308	0.118687	1.95732	0.0503104	0.739334
ENST00000674106.1	CTNND1	27.2591	-2.43273	1.24292	-1.95727	0.0503153	0.739334
ENST00000669238.1	MEG8	5.8466	2.13119	1.08933	1.95643	0.0504148	0.74035
ENST00000297303.4	XKR6	2.60262	-2.48473	1.27064	-1.9555	0.0505245	0.741514
ENST00000419585.5	FANCD2	22.9135	-0.665209	0.34041	-1.95414	0.0506843	0.743411
ENST00000409790.6	CLEC16A	252.159	-0.568931	0.291226	-1.95357	0.0507517	0.7437
ENST00000260327.9	CTDSPL2	690.755	-0.157356	0.0805524	-1.95346	0.0507651	0.7437
ENST00000216879.8	NSFL1C	404.142	-0.234131	0.119893	-1.95283	0.0508397	0.744345
ENST00000315711.12	CD200	114.709	-0.735278	0.376648	-1.95216	0.0509192	0.74506
ENST00000442160.7	ZNF410	1.15407	3.02543	1.55014	1.95171	0.0509732	NA
ENST00000547583.1	GLT8D2	1.15407	3.02543	1.55014	1.95171	0.0509732	NA
ENST00000366534.9	CATSPERE	18.8839	0.7227	0.370338	1.95146	0.0510025	0.745108
ENST00000246548.9	UBA2	1741.21	0.269491	0.138104	1.95137	0.0510132	0.745108
ENST00000592502.2	ZNF101	99.2449	-0.322411	0.165224	-1.95136	0.0510143	0.745108
ENST00000569835.1	AC011978.2	13.6062	-1.10748	0.567631	-1.95106	0.0510501	0.745185
ENST00000282397.9	FLT1	231.853	-0.542645	0.278243	-1.95025	0.0511458	0.746068
ENST00000273550.12	FTH1	3374.82	0.316774	0.162446	1.95003	0.051173	0.746068
ENST00000628542.2	EPB41L2	81.8971	3.37454	1.73075	1.94975	0.0512056	0.746068
ENST00000564349.5	ERI2	161.879	-1.07485	0.551342	-1.94952	0.0512332	0.746068
ENST00000369663.10	TBX18	29.4576	-0.67116	0.344545	-1.94796	0.0514196	0.747915
ENST00000227378.7	HSPA8	1543.8	-2.03506	1.04472	-1.94795	0.0514215	0.747915
ENST00000379484.10	MBTPS2	470.869	-0.25366	0.130309	-1.9466	0.0515826	0.749346
ENST00000370574.4	ZNHIT6	387.68	0.312192	0.160395	1.94639	0.0516078	0.749346
ENST00000649003.1	GJA1	2897.11	-3.90141	2.00447	-1.94635	0.0516122	0.749346
ENST00000556260.6	PPP2R5C	315.903	0.275554	0.141609	1.94588	0.0516694	0.74959
ENST00000561011.5	CCDC32	29.7069	-1.11085	0.570923	-1.9457	0.0516906	0.74959
ENST00000649859.1	FOXC2	44.7974	-0.726656	0.373683	-1.94458	0.0518258	0.750757
ENST00000180173.10	MTMR7	32.3805	0.624446	0.321131	1.94452	0.0518327	0.750757
ENST00000296679.9	WDR41	1637.69	0.243849	0.125444	1.94389	0.0519092	0.751418
ENST00000219837.12	KNOP1	327.632	0.327964	0.168751	1.94348	0.0519582	0.751681
ENST00000247986.2	KIF17	8.75206	-1.205	0.620614	-1.94163	0.052182	0.754469
ENST00000359365.8	RASSF1	53.5182	3.55143	1.82953	1.94117	0.0522371	0.754819
ENST00000451762.4	WDFY3-AS2	61.5697	0.522408	0.26922	1.94045	0.0523251	0.755641
ENST00000265056.12	MCM2	200.452	-0.945566	0.487378	-1.94011	0.0523666	0.755755
ENST00000627585.2	TNPO3	899.254	0.218515	0.112655	1.93968	0.0524181	0.755755
ENST00000512132.5	ZFP62	259.38	-0.449077	0.231529	-1.93962	0.0524261	0.755755
ENST00000378339.7	REEP2	93.1376	0.59778	0.308245	1.9393	0.0524647	0.755864
ENST00000540557.1	AL138752.2	10.1827	-2.80461	1.44667	-1.93866	0.0525429	0.756544
ENST00000368455.9	HSF2	31.2548	1.55502	0.802491	1.93774	0.0526546	0.757586
ENST00000251507.8	RABGAP1L	297.012	0.669192	0.345423	1.93732	0.0527068	0.757586
ENST00000610681.1	NUTM2B-AS1	2.20749	2.95019	1.52283	1.9373	0.0527087	0.757586
ENST00000396444.7	USP8	436.48	1.31785	0.680346	1.93703	0.0527411	0.757605
ENST00000648594.1	CDC42	28.8727	-2.82421	1.4585	-1.93637	0.0528218	0.758317
ENST00000502852.1	NUDT16	34.1551	-1.678	0.86673	-1.93601	0.0528667	0.758514
ENST00000564224.1	AL162231.4	13.2647	-1.42523	0.736533	-1.93505	0.0529839	0.759747
ENST00000670394.1	SNHG14	19.7792	2.14137	1.10723	1.93399	0.0531143	0.760921
ENST00000373018.7	FRS3	14.8232	1.07111	0.553883	1.93381	0.0531362	0.760921
ENST00000381070.8	CWC27	229.069	0.421291	0.217876	1.93362	0.0531594	0.760921
ENST00000558094.1	PSMA4	28.3355	3.67646	1.90185	1.9331	0.0532241	0.761398
ENST00000230792.7	NUDT12	391.835	-0.223814	0.115832	-1.93223	0.0533312	0.762483
ENST00000253506.9	NFATC1	1.46715	-2.55212	1.32084	-1.9322	0.0533354	NA
ENST00000355968.10	PPIA	297.81	0.823253	0.426197	1.93163	0.0534056	0.762726
ENST00000358755.5	FZD6	1538.95	0.615766	0.318788	1.93158	0.0534109	0.762726
ENST00000383791.8	SH3BP5	166.828	0.85909	0.44513	1.92998	0.0536095	0.765088
ENST00000221086.8	MTMR9	792.59	0.274791	0.142406	1.92963	0.0536525	0.765088
ENST00000250113.12	FXR2	542.963	0.304242	0.157717	1.92903	0.0537272	0.765088
ENST00000635992.1	AC098650.1	17.9217	2.54871	1.32127	1.92898	0.0537332	0.765088
ENST00000215095.11	STX1B	3.13742	-2.21464	1.14847	-1.92834	0.0538133	0.765088
ENST00000392185.8	SNX9	1365.37	0.327782	0.169984	1.92831	0.0538162	0.765088
ENST00000518068.5	ASPH	96.7196	-0.588565	0.305245	-1.92817	0.0538338	0.765088
ENST00000378985.7	RAP1B	10.4642	2.17961	1.13055	1.92792	0.0538651	0.765088
ENST00000604845.1	AC005034.3	4.07736	-2.17236	1.12684	-1.92783	0.0538763	0.765088
ENST00000576730.5	MCRIP1	229.555	1.50115	0.77872	1.92772	0.0538905	0.765088
ENST00000335007.10	PPP1CC	1183.73	-0.400344	0.207776	-1.92681	0.0540039	0.76599
ENST00000596251.6	DEDD2	196.246	0.337099	0.175067	1.92555	0.0541606	0.76599
ENST00000454366.2	GTSE1	84.8459	-0.778596	0.40437	-1.92545	0.0541726	0.76599
ENST00000379359.4	RGCC	274.426	-0.763668	0.39669	-1.9251	0.0542168	0.76599
ENST00000435364.7	KAT14	230.174	-0.351565	0.182626	-1.92506	0.0542224	0.76599
ENST00000380289.3	GRPR	31.1693	-1.62562	0.844482	-1.92498	0.0542314	0.76599
ENST00000407689.7	GAREM2	44.0232	0.580109	0.301384	1.92482	0.0542522	0.76599
ENST00000399151.3	DOP1B	310.363	0.392472	0.203923	1.92461	0.0542787	0.76599
ENST00000638119.1	REN	349.723	-0.258183	0.134198	-1.9239	0.0543666	0.76599
ENST00000301905.9	PBK	330.162	-0.884281	0.459658	-1.92378	0.0543824	0.76599
ENST00000330651.11	MAPK11	157.749	-0.428092	0.222533	-1.92372	0.0543893	0.76599
ENST00000570282.1	AC007541.1	10.3267	-0.895457	0.465485	-1.92371	0.0543912	0.76599
ENST00000587309.5	KIF18B	51.9844	-1.05368	0.547781	-1.92354	0.0544121	0.76599
ENST00000540986.5	CIAO3	41.7226	-2.8055	1.45857	-1.92345	0.0544232	0.76599
ENST00000590389.5	MICOS13	10.3792	2.4726	1.28552	1.92343	0.0544259	0.76599
ENST00000509791.7	SEC11C	96.3148	1.59381	0.828741	1.92317	0.0544581	0.766
ENST00000455833.7	IFFO2	282.651	-0.279045	0.145121	-1.92284	0.0544999	0.766069
ENST00000258648.7	MED4	267.66	-0.522763	0.271899	-1.92263	0.054526	0.766069
ENST00000591504.6	CCDC68	40.1823	0.929613	0.483891	1.92112	0.0547164	0.76693
ENST00000408991.4	C19orf73	4.62773	-1.52447	0.793666	-1.9208	0.054757	0.76693
ENST00000378566.5	FAM214B	62.367	-2.02183	1.05262	-1.92077	0.0547611	0.76693
ENST00000264057.6	SP100	142.088	0.638583	0.332475	1.9207	0.05477	0.76693
ENST00000279387.12	PPP4C	285.378	2.79782	1.45668	1.92067	0.0547727	0.76693
ENST00000368533.8	TPM3	1334.9	-0.862361	0.448995	-1.92065	0.0547762	0.76693
ENST00000224949.9	PITRM1	364.171	-1.86768	0.972794	-1.91991	0.0548688	0.767258
ENST00000367048.5	ACAT2	1032.46	-0.278435	0.145027	-1.91989	0.0548719	0.767258
ENST00000495075.5	MRPS22	144.716	-1.54137	0.802955	-1.91962	0.0549054	0.767258
ENST00000614558.2	MID1IP1	259.08	0.95211	0.496119	1.91912	0.0549695	0.767258
ENST00000393127.6	GRIA4	6.70477	1.40363	0.731433	1.91901	0.0549833	0.767258
ENST00000545882.5	CNN3	103.361	-2.82199	1.47058	-1.91897	0.0549887	0.767258
ENST00000295666.6	IGFBP7	13914.4	-0.444445	0.231731	-1.91794	0.0551185	0.768189
ENST00000261366.10	LMNB1	266.117	-0.722441	0.376675	-1.91794	0.0551185	0.768189
ENST00000614628.5	JADE3	161.434	-0.294143	0.153403	-1.91745	0.055181	0.768619
ENST00000374172.5	ARHGAP22	10.0933	3.46026	1.80537	1.91665	0.0552828	0.768664
ENST00000566866.5	EIF3C	835.41	1.84643	0.963393	1.91659	0.0552899	0.768664
ENST00000381341.6	DDX1	2525.27	0.156958	0.0819016	1.91642	0.055312	0.768664
ENST00000393567.7	HYDIN	3.74135	-1.75392	0.91524	-1.91635	0.0553203	0.768664
ENST00000427926.6	CLTCL1	223.877	0.734581	0.383357	1.91618	0.055342	0.768664
ENST00000262464.9	FBN2	6868.79	-0.33741	0.176153	-1.91544	0.0554364	0.769536
ENST00000307201.5	ABHD15	203.565	-0.292213	0.152593	-1.91498	0.0554948	0.769774
ENST00000371980.4	LURAP1	41.0392	0.579962	0.302882	1.91481	0.0555168	0.769774
ENST00000405510.5	SUN2	764.659	-0.255806	0.133687	-1.91347	0.055688	0.771453
ENST00000623539.1	AP000648.4	59.5866	-0.66354	0.346792	-1.91337	0.0557013	0.771453
ENST00000452929.6	KLC1	6.33932	-2.65544	1.3882	-1.91287	0.0557653	0.771901
ENST00000234453.10	PLEKHA3	559.582	0.312889	0.163612	1.91238	0.0558273	0.77232
ENST00000438528.7	SMIM19	23.219	2.54274	1.33029	1.91142	0.0559504	0.773378
ENST00000391857.9	RPL13A	13758.6	0.378907	0.198247	1.91129	0.0559673	0.773378
ENST00000373783.3	ADO	910.357	0.195172	0.102148	1.91067	0.0560474	0.774045
ENST00000667017.1	PXN-AS1	29.5309	-1.95654	1.02433	-1.91006	0.0561251	0.774501
ENST00000432901.4	PET117	177.293	0.351539	0.18406	1.90992	0.056144	0.774501
ENST00000576521.2	GIHCG	1.62661	-2.65653	1.39148	-1.90913	0.0562448	0.774988
ENST00000363872.1	Y_RNA	0.975189	-2.88088	1.50915	-1.90895	0.0562685	NA
ENST00000650871.1	ALPK1	72.216	-0.987494	0.517303	-1.90893	0.0562713	0.774988
ENST00000265245.10	LSG1	547.285	0.192154	0.100669	1.90878	0.0562909	0.774988
ENST00000345125.7	CTSB	3.25683	2.27564	1.19228	1.90865	0.0563066	0.774988
ENST00000238497.10	VPS4B	1137.28	0.213423	0.111849	1.90813	0.0563742	0.775183
ENST00000292246.8	ANO10	1088.6	0.239037	0.125294	1.9078	0.0564165	0.775183
ENST00000367145.4	SLC45A3	69.8029	0.620708	0.325431	1.90734	0.0564762	0.775183
ENST00000668046.1	AC069360.1	2.17018	-2.22489	1.16657	-1.90721	0.0564939	0.775183
ENST00000222693.5	CAV2	4997.2	-0.218886	0.114796	-1.90675	0.0565534	0.775183
ENST00000371408.7	SLC35G1	25.4367	-0.802202	0.420723	-1.90672	0.0565569	0.775183
ENST00000302450.11	CKAP2L	184.367	-0.737825	0.386963	-1.90671	0.0565587	0.775183
ENST00000407319.7	TRIOBP	208.091	-1.34226	0.704016	-1.90658	0.0565755	0.775183
ENST00000487148.5	CUTA	999.566	-0.315364	0.165442	-1.90619	0.0566256	0.775433
ENST00000334660.10	CHP1	2276.92	0.181418	0.0952097	1.90546	0.0567203	0.775877
ENST00000564754.6	ZNF106	36.5001	-0.863377	0.453174	-1.90518	0.0567571	0.775877
ENST00000558939.5	TLE3	17.9927	-1.14608	0.601595	-1.90506	0.0567719	0.775877
ENST00000398841.6	YPEL3	82.4074	0.456725	0.239783	1.90475	0.0568129	0.775877
ENST00000642260.1	EPB41	48.7549	0.986031	0.517679	1.90471	0.0568174	0.775877
ENST00000634783.1	AC103703.1	0.981051	-2.88178	1.51324	-1.90437	0.0568614	NA
ENST00000245817.5	TNFSF9	22.7592	-0.715621	0.375805	-1.90424	0.0568793	0.776287
ENST00000518852.5	PPP3CC	68.1183	-3.00601	1.57924	-1.90345	0.0569821	0.776665
ENST00000446526.8	PRPSAP1	371.872	-0.201191	0.105699	-1.90343	0.056984	0.776665
ENST00000367242.4	TMEM183A	1002.57	-0.273999	0.143969	-1.90319	0.0570162	0.776665
ENST00000367545.7	UTRN	2062.97	-0.403904	0.212241	-1.90305	0.0570345	0.776665
ENST00000443950.6	HNRNPF	1336.5	0.978454	0.514277	1.90258	0.0570953	0.777058
ENST00000472947.5	NMD3	2.09533	2.22238	1.16843	1.90202	0.0571685	0.77729
ENST00000556381.5	IFI27L1	2.1444	2.20889	1.16137	1.90196	0.0571762	0.77729
ENST00000243347.5	TNFAIP6	613.604	0.371844	0.195572	1.90131	0.0572608	0.778006
ENST00000375123.5	FOXE1	14.9787	-1.41833	0.746553	-1.89984	0.057454	0.780001
ENST00000618841.1	AC018926.3	3.42425	1.58605	0.834978	1.89951	0.0574981	0.780001
ENST00000531165.5	CELF1	34.0278	0.791533	0.416714	1.89946	0.0575038	0.780001
ENST00000648172.2	HAS2-AS1	110.568	0.333228	0.175563	1.89805	0.0576896	0.782035
ENST00000371037.9	SGIP1	425.623	-0.747443	0.39384	-1.89783	0.057718	0.782035
ENST00000361840.8	SPRYD7	51.7082	2.61372	1.37773	1.89712	0.0578126	0.782881
ENST00000392266.7	CASP8	15.575	3.56737	1.88125	1.89628	0.0579237	0.783899
ENST00000373616.9	MTCH1	1724.93	-0.313684	0.165456	-1.89587	0.0579771	0.783899
ENST00000011619.6	RANBP9	1093.15	0.172763	0.0911308	1.89577	0.0579902	0.783899
ENST00000369809.5	DNASE1L1	633.723	-0.608866	0.321336	-1.8948	0.0581194	0.783899
ENST00000493442.2	FAM199X	689.997	-0.305537	0.161255	-1.89475	0.0581257	0.783899
ENST00000312989.11	PPP1CA	31.0262	-1.05972	0.559404	-1.89437	0.0581761	0.783899
ENST00000217456.3	APMAP	1170.66	-0.277162	0.146313	-1.89432	0.0581832	0.783899
ENST00000609998.1	AC073957.3	5.36416	-1.98615	1.04875	-1.89382	0.0582488	0.783899
ENST00000358430.8	TXLNB	21.0972	0.870318	0.459584	1.89371	0.0582636	0.783899
ENST00000416505.6	IKBKB	104.513	1.8167	0.959492	1.8934	0.0583049	0.783899
ENST00000572447.6	PIMREG	178.976	-0.789309	0.41688	-1.89337	0.0583081	0.783899
ENST00000363549.1	AC090527.1	0.995483	-2.88418	1.52341	-1.89323	0.0583267	NA
ENST00000506259.5	HNRNPAB	111.999	-3.30623	1.74639	-1.89318	0.0583343	0.783899
ENST00000170447.12	MKRN2	681.57	0.235415	0.124355	1.89309	0.0583464	0.783899
ENST00000257017.5	RAB33A	64.0512	0.645848	0.341176	1.893	0.0583575	0.783899
ENST00000345146.6	PLEC	3567.7	0.286895	0.151563	1.8929	0.0583706	0.783899
ENST00000405303.7	TAPT1	403.513	0.329087	0.173956	1.89178	0.0585201	0.785465
ENST00000611259.1	AC027601.3	3.86347	1.80771	0.95568	1.89154	0.0585518	0.785465
ENST00000399286.3	KCNE1	0.998189	-2.88473	1.5254	-1.89113	0.0586076	NA
ENST00000649030.2	NDN	0.970874	2.86051	1.5126	1.89112	0.058609	NA
ENST00000382004.7	RFX3	87.3764	0.645645	0.34143	1.891	0.0586238	0.785941
ENST00000310823.8	ADAM17	710.891	0.53242	0.281606	1.89065	0.0586705	0.785941
ENST00000503176.6	PDK2	62.5945	-1.72451	0.912171	-1.89055	0.0586841	0.785941
ENST00000309295.9	EHBP1L1	351.335	-0.281972	0.149221	-1.88963	0.0588074	0.787159
ENST00000249364.9	CALU	5264.27	1.42919	0.756433	1.88938	0.0588407	0.787172
ENST00000609701.1	AP001033.2	5.0822	-1.26261	0.668541	-1.88861	0.0589447	0.788023
ENST00000263377.6	BRD4	83.514	-0.745795	0.39493	-1.88842	0.058969	0.788023
ENST00000265981.7	RNF141	1364.31	0.257371	0.136333	1.88782	0.0590503	0.788231
ENST00000602117.1	MARCHF2	239.825	0.486458	0.257691	1.88776	0.0590585	0.788231
ENST00000262426.6	FOXF1	105.578	-0.548501	0.29063	-1.88728	0.0591222	0.788231
ENST00000607003.5	SAP18	1116.96	0.334048	0.177007	1.8872	0.0591335	0.788231
ENST00000262160.11	SMAD2	2260.73	0.58191	0.308361	1.8871	0.0591464	0.788231
ENST00000583262.1	AC005224.3	4.98479	1.64911	0.874167	1.88649	0.0592288	0.788896
ENST00000623476.2	FP565260.2	114.015	3.7139	1.96909	1.8861	0.0592815	0.789166
ENST00000371123.5	SMARCA1	1211.29	1.10891	0.58809	1.88562	0.0593467	0.789383
ENST00000417942.5	XIST	4.05191	2.87787	1.52654	1.88522	0.0593996	0.789383
ENST00000619564.3	FGFR1	4.05191	2.87787	1.52654	1.88522	0.0593996	0.789383
ENST00000343017.11	SNX18	56.6688	1.28656	0.682617	1.88474	0.0594647	0.789383
ENST00000298852.7	PSMC3	96.7672	-0.915116	0.485566	-1.88464	0.0594788	0.789383
ENST00000524104.5	STAU2	8.9604	-2.92666	1.55316	-1.88433	0.0595203	0.789383
ENST00000380762.5	HCCS	396.211	-0.38993	0.206944	-1.88423	0.0595341	0.789383
ENST00000380953.6	NFIB	2.30716	-2.29578	1.2186	-1.88394	0.0595725	0.789383
ENST00000245407.7	HROB	44.8722	-0.599312	0.318153	-1.88372	0.0596023	0.789383
ENST00000551007.1	OAS3	4.90532	-2.44214	1.29654	-1.88358	0.059622	0.789383
ENST00000329524.8	NFATC3	14.2263	-3.17	1.68363	-1.88284	0.0597216	0.789658
ENST00000293771.10	ZNF653	6.16164	1.75004	0.929525	1.88272	0.0597383	0.789658
ENST00000450253.6	EIF4E	1095.75	-0.377053	0.200271	-1.88271	0.0597401	0.789658
ENST00000372857.7	PABPC4	456.269	2.74079	1.45648	1.88179	0.0598646	0.790807
ENST00000219439.9	HSDL1	843.96	0.194948	0.103608	1.88159	0.0598919	0.790807
ENST00000367498.8	IVNS1ABP	826.26	0.28009	0.148922	1.88079	0.0600008	0.791816
ENST00000506368.5	SCLT1	8.91587	-1.00193	0.532789	-1.88053	0.0600359	0.79185
ENST00000366955.8	CENPF	1640.19	-0.573997	0.305285	-1.8802	0.0600808	0.792013
ENST00000216039.9	JOSD1	1280.73	0.124924	0.0664533	1.87988	0.0601245	0.79216
ENST00000268383.7	CDR2	437.881	0.289233	0.153907	1.87928	0.0602069	0.792817
ENST00000662562.1	CDC42	10.7246	-2.63435	1.40261	-1.87818	0.0603559	0.794349
ENST00000378026.5	CKAP4	9512.1	0.133869	0.071285	1.87794	0.0603888	0.794353
ENST00000556230.2	RPS29	5.5714	-1.44454	0.769404	-1.87748	0.0604518	0.794536
ENST00000654821.1	AC129803.1	2.44146	-1.88661	1.00497	-1.87728	0.0604797	0.794536
ENST00000239151.5	HOXB5	4.26193	-1.39394	0.742658	-1.87696	0.0605231	0.794536
ENST00000403197.5	NMNAT1	15.9874	2.58556	1.3778	1.87659	0.0605744	0.794536
ENST00000374050.4	ATP6V1G1	2213.7	0.24166	0.128794	1.87633	0.0606093	0.794536
ENST00000318627.4	FIBIN	101.424	0.893155	0.47607	1.8761	0.0606415	0.794536
ENST00000358716.8	BAZ1A	859.973	-0.281591	0.150111	-1.87589	0.0606704	0.794536
ENST00000486715.5	LTC4S	298.219	-0.958994	0.511228	-1.87586	0.0606742	0.794536
ENST00000493463.2	ERVW-1	0.991077	2.86406	1.52683	1.87582	0.0606799	NA
ENST00000444867.1	SEMA3D	20.8497	1.37602	0.733606	1.8757	0.0606964	0.794536
ENST00000408454.1	SNORD88B	0.993108	2.86435	1.52798	1.87461	0.0608469	NA
ENST00000261499.10	B9D1	29.6358	-1.58094	0.843584	-1.87407	0.0609207	0.797043
ENST00000367996.6	ADAMTS4	85.3611	0.816492	0.436077	1.87236	0.0611572	0.799216
ENST00000635491.1	MUC20-OT1	137.499	1.94021	1.03626	1.87232	0.0611619	0.799216
ENST00000382389.5	CBWD1	15.7651	1.54043	0.822811	1.87215	0.0611853	0.799216
ENST00000261497.9	USP22	3637.06	-0.484597	0.259013	-1.87093	0.0613543	0.800994
ENST00000399598.7	UBXN2B	229.608	0.498976	0.266841	1.86993	0.061493	0.802375
ENST00000216468.8	TMED8	389.022	0.305028	0.163151	1.86961	0.0615384	0.802537
ENST00000323348.10	ANKZF1	78.8699	0.691669	0.370105	1.86885	0.0616444	0.803489
ENST00000451288.6	DCUN1D4	142.087	-3.48577	1.86584	-1.8682	0.0617341	0.803939
ENST00000320857.7	SSR4	333.348	3.33842	1.78724	1.86793	0.0617725	0.803939
ENST00000341871.7	C6orf132	76.3636	0.438504	0.234759	1.86789	0.061778	0.803939
ENST00000621914.4	AP2B1	2133.5	-0.60797	0.325763	-1.8663	0.0619998	0.805899
ENST00000340001.9	ABCA9	81.91	0.808876	0.433452	1.86613	0.0620238	0.805899
ENST00000279281.8	VPS51	604.221	0.390496	0.209258	1.8661	0.0620279	0.805899
ENST00000265036.10	DEPDC1B	31.7287	-1.61067	0.863602	-1.86506	0.0621737	0.807183
ENST00000409690.4	CEP19	82.8728	-0.485856	0.260548	-1.86474	0.0622172	0.807183
ENST00000580907.5	CCL2	9.12932	-1.06376	0.570548	-1.86446	0.0622575	0.807183
ENST00000275820.4	NOM1	199.796	-0.3762	0.201776	-1.86444	0.0622593	0.807183
ENST00000334306.4	SOWAHB	3.41314	-1.61889	0.868425	-1.86417	0.062298	0.807213
ENST00000265620.11	GNAS	3182.97	-1.23794	0.664145	-1.86396	0.0623279	0.807213
ENST00000497230.2	PRRX1	262.538	0.293304	0.1574	1.86343	0.0624024	0.80755
ENST00000378526.9	LIG3	329.474	-0.532605	0.28584	-1.8633	0.0624203	0.80755
ENST00000316836.5	PNMA1	660.187	0.212586	0.11415	1.86233	0.0625561	0.80867
ENST00000305510.4	CNNM3	55.3756	0.515409	0.276773	1.86221	0.0625733	0.80867
ENST00000314011.9	ZNF436	133.79	2.11871	1.13795	1.86186	0.0626229	0.808882
ENST00000276390.7	ATP6V1B2	916.524	0.346899	0.186371	1.86134	0.0626966	0.809404
ENST00000265395.7	HIBADH	593.64	0.208348	0.111952	1.86105	0.062737	0.809497
ENST00000623811.1	AC117503.2	3.51151	-1.9732	1.06042	-1.86078	0.0627756	0.809565
ENST00000300571.7	GPRC5B	56.1101	-0.872598	0.469095	-1.86017	0.062861	0.810014
ENST00000380817.8	SBF1	1780.52	0.377268	0.202886	1.85951	0.0629549	0.810014
ENST00000388835.4	KRT18	435.155	0.490875	0.263987	1.85947	0.0629609	0.810014
ENST00000470820.1	UCK2	43.2928	-1.56736	0.842984	-1.8593	0.0629853	0.810014
ENST00000434935.6	LINC02651	1024.06	-0.224481	0.120744	-1.85916	0.0630049	0.810014
ENST00000512091.6	ADGRL3	361.808	0.503234	0.270684	1.85912	0.06301	0.810014
ENST00000304842.6	TPST1	1367	0.255261	0.137334	1.85869	0.063071	0.810043
ENST00000353265.8	PARD6G	191.416	-0.540003	0.290537	-1.85864	0.0630788	0.810043
ENST00000376499.8	TLE1	286.693	0.242474	0.130482	1.8583	0.063127	0.810236
ENST00000264645.12	CASC3	494.397	-0.262932	0.141509	-1.85805	0.0631612	0.810248
ENST00000373243.7	NCDN	336.581	0.38268	0.206181	1.85604	0.063448	0.811791
ENST00000343217.6	DUSP28	4.64318	-2.2769	1.22688	-1.85584	0.063476	0.811791
ENST00000369864.5	AMIGO1	107.003	-0.554079	0.29857	-1.85577	0.0634857	0.811791
ENST00000244227.8	SNRNP27	271.143	-0.255352	0.137601	-1.85574	0.063491	0.811791
ENST00000370826.3	RABGGTB	2.84521	-2.06593	1.11328	-1.8557	0.0634956	0.811791
ENST00000373943.9	STX12	1843.75	-0.232297	0.125187	-1.8556	0.0635105	0.811791
ENST00000650285.1	IGF1R	486.154	-0.430481	0.231994	-1.85557	0.0635149	0.811791
ENST00000425354.7	RARG	502.123	0.270521	0.145873	1.8545	0.0636678	0.813318
ENST00000524575.5	YAP1	4.24431	3.29557	1.7779	1.85363	0.0637917	0.814473
ENST00000311330.4	CD248	1035.24	-0.241174	0.130188	-1.85251	0.0639532	0.815532
ENST00000449549.4	B3GNT9	544.195	0.33659	0.181702	1.85243	0.0639646	0.815532
ENST00000251900.9	SCML2	17.3606	-0.973023	0.52529	-1.85235	0.0639751	0.815532
ENST00000610245.1	AL671710.1	25.8415	-2.45148	1.32419	-1.85131	0.0641255	0.816728
ENST00000306315.9	ZNF608	22.3505	1.15649	0.624713	1.85123	0.064136	0.816728
ENST00000613363.4	ZNF302	381.702	-0.370976	0.200527	-1.85	0.0643133	0.816957
ENST00000369888.6	ZNF512B	267.683	-0.930962	0.503271	-1.84982	0.064339	0.816957
ENST00000346991.9	KNL1	596.524	-0.767782	0.415298	-1.84875	0.0644937	0.816957
ENST00000444214.6	FKBP11	15.0088	2.71543	1.46883	1.8487	0.0645011	0.816957
ENST00000361911.9	ZNF326	21.1403	-0.823206	0.445369	-1.84837	0.0645492	0.816957
ENST00000542174.5	CDK2AP1	3713.73	-0.249172	0.13481	-1.84832	0.0645561	0.816957
ENST00000361820.6	GRIN3A	2.96361	2.10777	1.14054	1.84805	0.064595	0.816957
ENST00000331373.10	POMK	380.067	0.369092	0.19974	1.84786	0.064622	0.816957
ENST00000349995.10	COG3	686.541	0.296434	0.160492	1.84703	0.0647425	0.816957
ENST00000400546.6	NCAM2	825.816	0.613645	0.33232	1.84654	0.0648131	0.816957
ENST00000668519.1	AC010735.2	147.699	-0.325901	0.176503	-1.84643	0.0648294	0.816957
ENST00000337110.11	MFF	32.5999	-3.54118	1.91789	-1.8464	0.0648347	0.816957
ENST00000393110.7	STEAP3	527.214	-0.248583	0.134688	-1.84562	0.0649474	0.816957
ENST00000411731.6	ERBB3	3.10292	2.20055	1.19233	1.84558	0.0649532	0.816957
ENST00000397463.3	LYPD1	148.573	0.876507	0.474961	1.84543	0.0649753	0.816957
ENST00000565576.5	MPI	14.7465	-1.21176	0.656691	-1.84524	0.0650019	0.816957
ENST00000216968.5	PROCR	309.808	0.288141	0.156159	1.84517	0.0650122	0.816957
ENST00000555265.6	CEP128	42.9295	-0.719368	0.389923	-1.8449	0.0650526	0.816957
ENST00000409433.2	PTRH2	1.70973	3.22289	1.74728	1.84451	0.0651084	0.816957
ENST00000547825.5	LIMA1	840.318	-2.20564	1.19592	-1.84431	0.0651385	0.816957
ENST00000329293.4	OLFML1	7.67474	1.0627	0.576248	1.84417	0.0651587	0.816957
ENST00000431742.2	CSTF3	7.54313	2.82856	1.53396	1.84396	0.065189	0.816957
ENST00000261326.6	MOCOS	38.9736	-0.656865	0.35624	-1.84388	0.0652001	0.816957
ENST00000374049.4	TMEM268	171.443	0.362519	0.196632	1.84364	0.0652352	0.816957
ENST00000447119.2	UNC5B-AS1	4.41149	-1.47754	0.801456	-1.84356	0.0652467	0.816957
ENST00000586923.1	AC010327.6	43.5158	-1.42938	0.775574	-1.843	0.0653289	0.816957
ENST00000615604.1	AC004080.14	4.50844	-1.99858	1.085	-1.84202	0.0654729	0.816957
ENST00000419349.2	GPX1	3.4414	-1.61745	0.878102	-1.84198	0.0654775	0.816957
ENST00000560351.2	AC015712.2	10.3035	3.69209	2.0048	1.84162	0.0655303	0.816957
ENST00000410032.5	MLPH	11.2723	3.693	2.00552	1.84142	0.0655601	0.816957
ENST00000317907.9	TTC27	315.495	-0.250986	0.136326	-1.84107	0.0656106	0.816957
ENST00000451436.6	EDA2R	13.5808	3.69416	2.00682	1.84081	0.0656501	0.816957
ENST00000616524.4	PHOSPHO2	16.6515	-1.0709	0.581799	-1.84066	0.065671	0.816957
ENST00000267079.6	MAP3K12	152.956	0.347338	0.188737	1.84033	0.0657192	0.816957
ENST00000436988.1	IER3	182.184	0.320165	0.174015	1.83987	0.0657875	0.816957
ENST00000534300.5	AMBRA1	6.08334	1.37434	0.747141	1.83946	0.0658476	0.816957
ENST00000264033.6	CBL	618.412	-0.476521	0.25915	-1.83879	0.0659466	0.816957
ENST00000449131.6	BEST1	190.509	1.65378	0.899533	1.83848	0.065991	0.816957
ENST00000367409.9	ASPM	1044.78	-0.787624	0.428415	-1.83846	0.0659944	0.816957
ENST00000252011.8	DHX35	114.946	0.356484	0.193941	1.83811	0.0660467	0.816957
ENST00000358431.7	KIAA1671	4.49756	1.74641	0.950174	1.83799	0.0660639	0.816957
ENST00000558581.5	DHRS4	9.51885	-3.68393	2.00458	-1.83776	0.066098	0.816957
ENST00000370475.8	SDHAF4	13.2817	-3.68803	2.00701	-1.83757	0.0661254	0.816957
ENST00000302327.4	ING2	132.495	0.279917	0.152334	1.83752	0.0661335	0.816957
ENST00000216797.9	PCK2	100.207	1.84861	1.00618	1.83726	0.066172	0.816957
ENST00000374389.8	SRRM1	14.2425	-3.68774	2.00747	-1.83701	0.0662077	0.816957
ENST00000299977.9	SLFN5	1084.5	1.38155	0.75225	1.83655	0.0662758	0.816957
[truncated: 98,456 more rows]
