# Supplementary material for: Evolutionary transcriptomics implicates HAND2 in the origins of implantation and regulation of gestation length
Source: eLife. 2021 Feb 1;10:e61257. doi: 10.7554/eLife.61257 (PMC7943190; doi:10.7554/eLife.61257)
Supplement: Figure 3—source data 2. [file elife-61257-fig3-data2.xlsx]

## Sheet: Figure 3—source data 2
Figure 3—source data 2. Pathways (Wikipathway 2019) enriched among genes differentially expressed by HAND2 knockown.
Term	P-value	Adjusted P-value (FDR)	Odds Ratio	Combined Score	Genes
Wnt Signaling Pathway WP363	0.000314086	0.0989371	5.3313	43.0015	GSK3B;CDK6;TSC1;CSNK1D;PPARG;TCF3;CSNK1G1
BMP Signaling Pathway WP3927	0.00141084	0.222207	7.92079	51.9887	BMP4;SMAD5;EGFR;MAPK3
Differentiation of white and brown adipocyte WP2895	0.00333414	0.228797	6.33663	36.1413	BMP4;SMAD9;PPARG;SMAD5
Intraflagellar transport proteins binding to dynein WP4532	0.00444538	0.228797	5.86725	31.7764	DYNC1I2;IFT140;DYNLRB1;WDR34
Signaling Pathways in Glioblastoma WP2261	0.00467382	0.228797	3.38083	18.1408	MSH6;NRAS;CDK6;SPRY2;TSC1;EGFR;MAPK3
Regulation of Actin Cytoskeleton WP51	0.00485185	0.228797	2.64026	14.0684	NRAS;RDX;GNA12;FN1;PIP4K2A;BDKRB1;MAPK6;PTK2;EGFR;MAPK3
Nanoparticle-mediated activation of receptor signaling WP2643	0.00508437	0.228797	5.65771	29.8817	NRAS;FN1;EGFR;PTK2
TCA Cycle Nutrient Utilization and Invasiveness of Ovarian Cancer WP2868	0.00604912	0.238184	15.8416	80.9163	EGFR;MAPK3
RAC1/PAK1/p38/MMP2 Pathway WP3303	0.0073458	0.238562	3.49447	17.1705	NRAS;CHUK;FN1;EGFR;PTK2;MAPK3
ErbB Signaling Pathway WP673	0.00820869	0.238562	3.04646	14.6308	GSK3B;NRAS;CBLB;EGFR;PTK2;CRKL;MAPK3
TNF alpha Signaling Pathway WP231	0.00869717	0.238562	3.01334	14.2976	TRAP1;NRAS;CHUK;BTRC;NFKBIE;GLUL;MAPK3
Primary Focal Segmental Glomerulosclerosis FSGS WP2572	0.00964241	0.238562	3.30033	15.3188	TRPC6;CTSL;ITGA3;SYNPO;PTK2;CD2AP
Inhibition of exosome biogenesis and secretion by Manumycin A in CRPC cells WP4301	0.00984542	0.238562	6.60066	30.5	NRAS;HNRNPH1;MAPK3
TGF-beta Receptor Signaling WP560	0.0115189	0.244419	3.66703	16.3688	BMP4;ZEB2;SMAD9;SMAD5;MAPK3
Cardiac Hypertrophic Response WP2795	0.0124149	0.244419	3.60036	15.8015	GSK3B;CHUK;IKBKE;HDAC9;MAPK3
IL-1 signaling pathway WP195	0.0124149	0.244419	3.60036	15.8015	CHUK;PELI2;SQSTM1;MYD88;MAPK3
Circadian rhythm related genes WP3594	0.0134524	0.249266	2.16738	9.33837	HEBP1;ARNT2;GSK3B;NFIL3;KCNMA1;UBC;CSNK1D;PPARG;BTRC;BTBD9;ARNTL
Neovascularisation processes WP4331	0.0151756	0.265572	5.65771	23.6949	SMAD9;SMAD5;MAPK3
Ebola Virus Pathway on Host WP4217	0.0167366	0.271665	2.45606	10.0457	RFC1;CTSL;ITGA3;ICAM3;IKBKE;EGFR;RHOB;MAPK3
PI3K/AKT/mTOR - VitD3 Signalling WP4141	0.0172485	0.271665	5.40054	21.9263	GSK3B;SLC2A3;TSC1
DNA Mismatch Repair WP531	0.0203658	0.288894	8.80088	34.2697	MSH6;RFC1
Pyrimidine metabolism WP4022	0.0205814	0.288894	2.79557	10.8562	NME1-NME2;POLD4;POLR1C;POLR3G;TK1;NME1
Splicing factor NOVA regulated synaptic proteins WP4148	0.0210939	0.288894	3.77181	14.5545	APLP2;KCNMA1;ATP2B1;CLASP1
AGE/RAGE pathway WP2324	0.0255096	0.334813	3.0003	11.0072	CHUK;DDOST;EGFR;MYD88;MAPK3
Aryl Hydrocarbon Receptor Pathway WP2873	0.0284422	0.358371	3.44382	12.2596	SLC7A5;HES1;JUNB;EGFR
TLR4 Signaling and Tolerance WP3851	0.032843	0.385607	4.24328	14.4951	CHUK;IKBKE;MYD88
Bile Acids synthesis and enterohepatic circulation WP4389	0.0355212	0.385607	6.60066	22.0305	LDLR;MAPK3
Synaptic signaling pathways associated with autism spectrum disorder WP4539	0.0371354	0.385607	3.16832	10.4339	GSK3B;NRAS;TSC1;MAPK3
BMP2-WNT4-FOXO1 Pathway in Human Primary Endometrial Stromal Cell Differentiation WP3876	0.0412907	0.385607	6.09292	19.4188	SMAD9;SMAD5
Genes targeted by miRNAs in adipocytes WP1992	0.0412907	0.385607	6.09292	19.4188	HAND2;PTBP2
MFAP5-mediated ovarian cancer cell motility and invasiveness WP3301	0.0412907	0.385607	6.09292	19.4188	PTK2;MAPK3
Osteopontin Signaling WP1434	0.0412907	0.385607	6.09292	19.4188	CHUK;MAPK3
Translation Factors WP107	0.0419934	0.385607	3.04646	9.65802	EEF1A1;EIF2B3;EIF3J;ETF1
Toll-like Receptor Signaling WP3858	0.0426497	0.385607	3.83264	12.091	CHUK;IKBKE;MYD88
Neural Crest Differentiation WP2064	0.0428452	0.385607	2.35271	7.41142	BMP4;GSK3B;HDAC11;HES1;HDAC9;RHOB
Prion disease pathway WP3995	0.0499088	0.413149	3.60036	10.7923	CHD2;PTK2;MAPK3
RANKL/RANK (Receptor activator of NFKB (ligand)) Signaling Pathway WP2018	0.0499208	0.413149	2.88029	8.63314	CHUK;SQSTM1;PTK2;MAPK3
TGF-beta Signaling Pathway WP366	0.0502774	0.413149	2.10021	6.28005	TRAP1;ZEB2;FN1;STRAP;BTRC;JUNB;PTK2
BDNF-TrkB Signaling WP3676	0.0537489	0.413149	3.49447	10.2158	NRAS;TRPC6;TSC1
Signaling of Hepatocyte Growth Factor Receptor WP313	0.0537489	0.413149	3.49447	10.2158	PTK2;CRKL;MAPK3
Complement and Coagulation Cascades WP558	0.0586118	0.413149	2.73131	7.74823	LMAN1;C7;BDKRB1;CD55
Interactome of polycomb repressive complex 2 (PRC2) WP2916	0.0604611	0.413149	4.9505	13.8899	RBBP7;EZH1
MicroRNAs in cardiomyocyte hypertrophy WP1544	0.0613985	0.413149	2.35738	6.57796	GSK3B;CHUK;IKBKE;HDAC9;MAPK3
Viral Acute Myocarditis WP4298	0.0613985	0.413149	2.35738	6.57796	GSK3B;BNIP2;DMD;CD55;MAPK3
MET in type 1 papillary renal cell carcinoma WP4205	0.0616767	0.413149	2.68501	7.48004	NRAS;PTK2;CRKL;MAPK3
Regulation of toll-like receptor signaling pathway WP1449	0.0629037	0.413149	1.99444	5.51693	CHUK;PELI2;TMED7;SQSTM1;IKBKE;MYD88;MAPK3
Fibrin Complement Receptor 3 Signaling Pathway WP4136	0.066084	0.413149	3.21113	8.72409	CHUK;CBLB;MYD88
Melatonin metabolism and effects WP3298	0.066084	0.413149	3.21113	8.72409	GSK3B;CSNK1D;ARNTL
Regulation of Wnt/B-catenin Signaling by Small Molecule Compounds WP3664	0.067408	0.413149	4.65929	12.5661	GSK3B;TNKS
Hair Follicle Development: Cytodifferentiation (Part 3 of 3) WP2840	0.0692279	0.413149	2.27609	6.07796	BMP4;IGFBP5;CUX1;TCF3;EGFR
Proteasome Degradation WP183	0.0713672	0.413149	2.55509	6.74524	PSMC6;UBE2B;UBE2D3;UBC
ESC Pluripotency Pathways WP3931	0.073805	0.413149	2.04848	5.33901	BMP4;GSK3B;SMAD9;MAPK6;SMAD5;EGFR
4-hydroxytamoxifen, Dexamethasone, and Retinoic Acids Regulation of p27 Expression WP3879	0.0746034	0.413149	4.40044	11.4216	TSC1;MAPK3
Simplified Interaction Map Between LOXL4 and Oxidative Stress Pathway WP3670	0.0746034	0.413149	4.40044	11.4216	FN1;PKD1
TGF-B Signaling in Thyroid Cells for Epithelial-Mesenchymal Transition WP3859	0.0746034	0.413149	4.40044	11.4216	FN1;MAPK3
Pancreatic adenocarcinoma pathway WP4263	0.0747396	0.413149	2.22494	5.77093	CDK6;CHUK;DUSP6;EGFR;MAPK3
Endometrial cancer WP4155	0.0747603	0.413149	2.51454	6.52137	GSK3B;NRAS;EGFR;MAPK3
Androgen receptor signaling pathway WP138	0.0775823	0.415393	2.20022	5.62468	GSK3B;DAXX;EGFR;PTK2;RHOB
Oncostatin M Signaling Pathway WP2374	0.0817859	0.415393	2.43717	6.10181	MMP3;JUNB;LDLR;MAPK3
Overview of nanoparticle effects WP3287	0.0820302	0.415393	4.16884	10.4249	FN1;PTK2
Association Between Physico-Chemical Features and Toxicity Associated Pathways WP3680	0.0854167	0.415393	2.40024	5.9051	GSK3B;FN1;EGFR;PTK2
Non-small cell lung cancer WP4255	0.0854167	0.415393	2.40024	5.9051	NRAS;CDK6;EGFR;MAPK3
Integrated Breast Cancer Pathway WP1984	0.0886646	0.415393	1.83595	4.4483	MSH6;UBE2F;CHUK;TSC1;CSNK1D;RPP38;EGFR
PPAR signaling pathway WP3942	0.0891247	0.415393	2.36442	5.71649	FABP4;SCP2;DBI;PPARG
DNA Replication WP466	0.0891971	0.415393	2.82885	6.83708	POLD4;RFC1;UBC
TNF related weak inducer of apoptosis (TWEAK) Signaling Pathway WP2036	0.0891971	0.415393	2.82885	6.83708	GSK3B;CHUK;MAPK3
Hematopoietic Stem Cell Gene Regulation by GABP alpha/beta Complex WP3657	0.0896722	0.415393	3.9604	9.55087	GABPB1;ZFX
Serotonin Receptor 2 and ELK-SRF/GATA4 signaling WP732	0.0896722	0.415393	3.9604	9.55087	NRAS;MAPK3
IL-6 signaling pathway WP364	0.0941764	0.429936	2.76307	6.52798	GSK3B;JUNB;MAPK3
Sterol Regulatory Element-Binding Proteins (SREBP) signalling WP1982	0.0967684	0.434424	2.29588	5.36188	SAR1B;DBI;PPARG;LDLR
Ciliary landscape WP4352	0.0979178	0.434424	1.65017	3.83437	DYNC1I2;PSMC6;IFT140;ARHGDIA;COPS7A;BBS7;DYNLRB1;WDR34;CNOT9
Complement Activation WP545	0.105541	0.46174	3.60036	8.09599	C7;CD55
Epithelial to mesenchymal transition in colorectal cancer WP4239	0.108702	0.467265	1.74357	3.86923	CLDN11;GSK3B;ZEB2;FN1;STRAP;PKD1;MAPK3
Regulation of Microtubule Cytoskeleton WP2038	0.10977	0.467265	2.58287	5.7065	GSK3B;TESK2;CLASP1
Nuclear Receptors Meta-Pathway WP2882	0.111385	0.467817	1.4898	3.26977	SLC7A5;SCP2;MAFG;TXNRD1;SLC39A8;SLC2A3;DBI;HES1;SLC7A11;JUNB;SQSTM1;EGFR
NRF2-ARE regulation WP4357	0.113738	0.471412	3.44382	7.48639	GSK3B;SLC7A11
Leptin signaling pathway WP2034	0.125787	0.507275	2.08442	4.32134	GSK3B;CHUK;PTK2;MAPK3
Structural Pathway of Interleukin 1 (IL-1) WP2637	0.126278	0.507275	2.42473	5.01742	CHUK;MYD88;MAPK3
Focal Adhesion WP306	0.129583	0.507275	1.60016	3.26982	GSK3B;ITGA3;FN1;TESK2;PTK2;EGFR;CRKL;MAPK3
IL-7 Signaling Pathway WP205	0.130589	0.507275	3.16832	6.44974	GSK3B;MAPK3
Signal Transduction of S1P Receptor WP26	0.130589	0.507275	3.16832	6.44974	MAPK6;MAPK3
Ectoderm Differentiation WP2858	0.137081	0.507275	1.72191	3.42175	BMP4;CLDN11;SPRY2;DMD;TCF3;ZBTB7B
PPAR Alpha Pathway WP2878	0.139218	0.507275	3.04646	6.00675	SCP2;DBI
Wnt/beta-catenin Signaling Pathway in Leukemia WP3658	0.139218	0.507275	3.04646	6.00675	GSK3B;TCF3
Metastatic brain tumor WP2249	0.142269	0.507275	6.60066	12.8715	CDK6
Focal Adhesion-PI3K-Akt-mTOR-signaling pathway WP3932	0.146667	0.507275	1.43777	2.75992	RAB10;GSK3B;NRAS;ITGA3;FN1;TSC1;SLC2A3;EIF4E2;PTK2;EGFR;MAPK3
Canonical and Non-canonical Notch signaling WP3845	0.147966	0.507275	2.93363	5.6055	CHUK;HES1
Follicle Stimulating Hormone (FSH) signaling pathway WP2035	0.147966	0.507275	2.93363	5.6055	SGK1;MAPK3
Apoptosis-related network due to altered Notch3 in ovarian cancer WP2864	0.149552	0.507275	2.24173	4.25954	SQSTM1;TNFRSF21;PTK2
PI3K-Akt Signaling Pathway WP4172	0.15413	0.507275	1.39779	2.6138	GSK3B;NRAS;CDK6;CHUK;ITGA3;FN1;TSC1;SGK1;EIF4E2;PTK2;EGFR;MAPK3
IL-4 Signaling Pathway WP395	0.155573	0.507275	2.20022	4.09382	CHUK;NFIL3;MAPK3
Hfe effect on hepcidin production WP3924	0.163933	0.507275	5.65771	10.2308	HFE
Mevalonate pathway WP3963	0.163933	0.507275	5.65771	10.2308	MVK
MicroRNA for Targeting Cancer Growth and Vascularization in Glioblastoma WP3593	0.163933	0.507275	5.65771	10.2308	HES1
Molybdenum cofactor (Moco) biosynthesis WP4507	0.163933	0.507275	5.65771	10.2308	MOCS2
NRF2 pathway WP2884	0.164878	0.507275	1.62756	2.93376	MAFG;TXNRD1;SLC39A8;SLC2A3;SLC7A11;SQSTM1
MAPK Cascade WP422	0.165774	0.507275	2.73131	4.90852	NRAS;MAPK3
Pathways in clear cell renal cell carcinoma WP4018	0.167692	0.507275	1.86372	3.3279	TSC1;SQSTM1;PSPH;EGFR
MAPK Signaling Pathway WP382	0.171568	0.507275	1.44893	2.55413	DAXX;NRAS;CHUK;GNA12;DUSP16;DUSP6;EGFR;CRKL;MAPK3
Extracellular vesicle-mediated signaling in recipient cells WP2870	0.174812	0.507275	2.64026	4.60473	NRAS;EGFR
PI3K-AKT-mTOR signaling pathway and therapeutic opportunities WP3844	0.174812	0.507275	2.64026	4.60473	GSK3B;NRAS
Vitamin D Receptor Pathway WP2877	0.178115	0.507275	1.52323	2.62807	STS;IGFBP5;BDKRB1;KRT34;MYO9B;ATP2B1;JUNB
Factors and pathways affecting insulin-like growth factor (IGF1)-Akt signaling WP3850	0.183927	0.507275	2.55509	4.32633	GSK3B;IGFBP5
IL17 signaling pathway WP2112	0.183927	0.507275	2.55509	4.32633	GSK3B;MAPK3
Trans-sulfuration and one carbon metabolism WP2525	0.183927	0.507275	2.55509	4.32633	MTHFD1;PSPH
HIF1A and PPARG regulation of glycolysis WP2456	0.185051	0.507275	4.9505	8.3521	PPARG
Phase I biotransformations, non P450 WP136	0.185051	0.507275	4.9505	8.3521	PON2
Kit receptor signaling pathway WP304	0.186724	0.507275	2.01376	3.37934	JUNB;CRKL;MAPK3
Cell Cycle WP179	0.187162	0.507275	1.65017	2.76531	GSK3B;STAG2;CDK6;CDC16;ANAPC5
T-Cell antigen Receptor (TCR) Signaling Pathway WP69	0.19284	0.507275	1.76018	2.89706	CHUK;CBLB;CRKL;MAPK3
Development and heterogeneity of the ILC family WP3893	0.193108	0.507275	2.47525	4.07056	NFIL3;IL15
Mammary gland development pathway - Pregnancy and lactation (Stage 3 of 4) WP2817	0.193108	0.507275	2.47525	4.07056	CHUK;EGFR
RIG-I-like Receptor Signaling WP3865	0.19314	0.507275	1.9802	3.25612	SIKE1;CHUK;IKBKE
Breast cancer pathway WP4262	0.194845	0.507275	1.54301	2.52368	GSK3B;NRAS;CDK6;HES1;EGFR;MAPK3
Amino Acid metabolism WP3925	0.198006	0.507275	1.74083	2.81921	AUH;ASNS;HNMT;GLUL
Apoptosis Modulation and Signaling WP1772	0.198006	0.507275	1.74083	2.81921	DAXX;MYD88;MAPK3;TNFRSF10D
Alpha 6 Beta 4 signaling pathway WP244	0.202347	0.507275	2.40024	3.83504	PTK2;MAPK3
Oxidative Stress WP408	0.202347	0.507275	2.40024	3.83504	TXNRD1;JUNB
Resistin as a regulator of inflammation WP4481	0.202347	0.507275	2.40024	3.83504	CHUK;MAPK3
Signal transduction through IL1R WP4496	0.202347	0.507275	2.40024	3.83504	CHUK;MYD88
Composition of Lipid Particles WP3601	0.205637	0.507275	4.40044	6.95993	LDLR
Heme Biosynthesis WP561	0.205637	0.507275	4.40044	6.95993	UROS
Metabolism of Spingolipids in ER and Golgi apparatus WP4142	0.205637	0.507275	4.40044	6.95993	GALNT1
Methylation Pathways WP704	0.205637	0.507275	4.40044	6.95993	HNMT
NLR Proteins WP288	0.205637	0.507275	4.40044	6.95993	CHUK
Role Altered Glycolysation of MUC1 in Tumour Microenvironment WP4480	0.205637	0.507275	4.40044	6.95993	CHUK
Supression of HMGB1 mediated inflammation by THBD WP4479	0.205637	0.507275	4.40044	6.95993	CHUK
T-Cell antigen Receptor (TCR) pathway during Staphylococcus aureus infection WP3863	0.206131	0.507275	1.91632	3.02634	GSK3B;CHUK;MAPK3
Corticotropin-releasing hormone signaling pathway WP2355	0.208461	0.509033	1.7034	2.67093	GSK3B;JUNB;PTK2;MAPK3
Type 2 papillary renal cell carcinoma WP4241	0.211634	0.512806	2.32964	3.6177	EGLN1;ARNT2
mRNA Processing WP411	0.213745	0.513966	1.57159	2.42491	RBM39;SNRPD2;HNRNPH1;SNRPE;PTBP2
Insulin Signaling WP481	0.218562	0.521568	1.48515	2.25844	GSK3B;CBLB;TSC1;SGK1;MAPK6;MAPK3
Photodynamic therapy-induced NF-kB survival signaling WP3617	0.220962	0.523331	2.26308	3.41673	CHUK;MMP3
Ethanol metabolism resulting in production of ROS by CYP2E1 WP4269	0.225703	0.526641	3.9604	5.89518	MAFG
Interleukin-1 Induced Activation of NF-kappa-B WP3656	0.225703	0.526641	3.9604	5.89518	SQSTM1
Zinc homeostasis WP3529	0.230322	0.533466	2.20022	3.23053	SLC30A6;SLC39A8
Adipogenesis WP236	0.232093	0.533645	1.52323	2.22485	BMP4;WWTR1;LMNA;PPARG;ZMPSTE24
Chemokine signaling pathway WP3929	0.234888	0.536158	1.44893	2.09898	GSK3B;NRAS;CHUK;PTK2;CRKL;MAPK3
Photodynamic therapy-induced HIF-1 survival signaling WP3614	0.239707	0.536515	2.14075	3.05772	EGLN1;SLC2A3
miRNAs involvement in the immune response in sepsis WP4329	0.239707	0.536515	2.14075	3.05772	CHUK;MYD88
Angiopoietin Like Protein 8 Regulatory Pathway WP3915	0.241432	0.536515	1.50015	2.13197	GSK3B;CBLB;TSC1;MAPK6;MAPK3
Gene regulatory network modelling somitogenesis WP2854	0.245264	0.536515	3.60036	5.06002	HES1
NAD metabolism, sirtuins and aging WP3630	0.245264	0.536515	3.60036	5.06002	PPARG
PTF1A related regulatory pathway WP4147	0.245264	0.536515	3.60036	5.06002	HES1
Parkinsons Disease Pathway WP2371	0.24911	0.537463	2.08442	2.89705	SYT11;UBE2G1
Sleep regulation WP3591	0.24911	0.537463	2.08442	2.89705	OXTR;BTBD9
Integrin-mediated Cell Adhesion WP185	0.251691	0.537588	1.56847	2.16379	GIT2;ITGA3;MAPK6;PTK2
PDGF Pathway WP2526	0.258523	0.537588	2.03097	2.74744	CHUK;MAPK3
Genes related to primary cilium development (based on CRISPR) WP4536	0.262787	0.537588	1.53802	2.05542	BBS10;IFT140;BBS7;WDR34
Toll-like Receptor Signaling Pathway WP75	0.262787	0.537588	1.53802	2.05542	CHUK;IKBKE;MYD88;MAPK3
Iron metabolism in placenta WP2007	0.264332	0.537588	3.30033	4.39126	IREB2
MAPK and NFkB Signalling Pathways Inhibited by Yersinia YopJ WP3849	0.264332	0.537588	3.30033	4.39126	CHUK
RalA downstream regulated genes WP2290	0.264332	0.537588	3.30033	4.39126	NRAS
miRNA Regulation of DNA Damage Response WP1530	0.266595	0.537588	1.67341	2.21228	CDK6;RFC1;CCNG1
Bladder Cancer WP2828	0.267941	0.537588	1.9802	2.6079	NRAS;EGFR
Ferroptosis WP4313	0.267941	0.537588	1.9802	2.6079	SLC39A8;SLC7A11
IL-5 Signaling Pathway WP127	0.267941	0.537588	1.9802	2.6079	GSK3B;MAPK3
Senescence and Autophagy in Cancer WP615	0.273974	0.541783	1.50872	1.95338	GSK3B;IGFBP5;FN1;SQSTM1
Chromosomal and microsatellite instability in colorectal cancer WP4216	0.280336	0.541783	1.62756	2.06988	MSH6;GSK3B;MAPK3
Disorders of Folate Metabolism and Transport WP4259	0.282918	0.541783	3.04646	3.84645	MTHFD1
Homologous recombination WP186	0.282918	0.541783	3.04646	3.84645	POLD4
Mammary gland development pathway - Puberty (Stage 2 of 4) WP2814	0.282918	0.541783	3.04646	3.84645	FN1
Transcriptional cascade regulating adipogenesis WP4211	0.282918	0.541783	3.04646	3.84645	PPARG
Fas Ligand (FasL) pathway and Stress induction of Heat Shock Proteins (HSP) regulation WP314	0.286765	0.541783	1.8859	2.35567	DAXX;LMNA
IL-2 Signaling Pathway WP49	0.286765	0.541783	1.8859	2.35567	CRKL;MAPK3
Metabolic reprogramming in colon cancer WP4290	0.286765	0.541783	1.8859	2.35567	PGAM1;PSPH
Arrhythmogenic Right Ventricular Cardiomyopathy WP2118	0.287231	0.541783	1.60557	2.00289	ITGA3;LMNA;DMD
ERK Pathway in Huntington's Disease WP3853	0.301036	0.551592	2.82885	3.39611	EGFR
Prolactin Signaling Pathway WP2037	0.301058	0.551592	1.56331	1.87668	GSK3B;PTK2;MAPK3
DNA Damage Response (only ATM dependent) WP710	0.302257	0.551592	1.44014	1.7231	GSK3B;NRAS;SCP2;LDLR
Heart Development WP1591	0.305535	0.551592	1.80018	2.13446	BMP4;HAND2
Hedgehog Signaling Pathway WP4249	0.305535	0.551592	1.80018	2.13446	CSNK1D;CSNK1G1
Interleukin-11 Signaling Pathway WP2332	0.305535	0.551592	1.80018	2.13446	CHUK;MAPK3
Glycolysis and Gluconeogenesis WP534	0.314887	0.551592	1.76018	2.03396	PGAM1;SLC2A3
Prostaglandin Synthesis and Regulation WP98	0.314887	0.551592	1.76018	2.03396	ANXA3;PPARG
Cholesterol Biosynthesis Pathway WP197	0.318698	0.551592	2.64026	3.01917	MVK
GPCRs, Class C Metabotropic glutamate, pheromone WP501	0.318698	0.551592	2.64026	3.01917	GPRC5A
GPR40 Pathway WP3958	0.318698	0.551592	2.64026	3.01917	PKD1
Mammary gland development pathway - Embryonic development (Stage 1 of 4) WP2813	0.318698	0.551592	2.64026	3.01917	ZEB2
Oxysterols derived from cholesterol WP4545	0.318698	0.551592	2.64026	3.01917	GPR183
Phytochemical activity on NRF2 transcriptional activation WP3	0.318698	0.551592	2.64026	3.01917	SLC7A11
miRNAs involved in DNA damage response WP1545	0.318698	0.551592	2.64026	3.01917	CDK6
Aryl Hydrocarbon Receptor WP2586	0.324211	0.556909	1.72191	1.9395	NRAS;EGFR
Energy Metabolism WP1541	0.333501	0.556909	1.68527	1.85062	GSK3B;PPARG
NO/cGMP/PKG mediated Neuroprotection WP4008	0.333501	0.556909	1.68527	1.85062	AKAP9;TSPO
Cori Cycle WP1946	0.335913	0.556909	2.47525	2.70025	PGAM1
Deregulation of Rab and Rab Effector Genes in Bladder Cancer WP2291	0.335913	0.556909	2.47525	2.70025	RAB27B
Hedgehog Signaling Pathway WP47	0.335913	0.556909	2.47525	2.70025	ARNTL
Metabolic pathway of LDL, HDL and TG, including diseases WP4522	0.335913	0.556909	2.47525	2.70025	LDLR
SREBF and miR33 in cholesterol and lipid homeostasis WP2011	0.335913	0.556909	2.47525	2.70025	LDLR
Spinal Cord Injury WP2431	0.348072	0.563954	1.34251	1.41681	CCNG1;EGFR;RHOB;MAPK3
IL-3 Signaling Pathway WP286	0.351966	0.563954	1.61649	1.68797	CRKL;MAPK3
ACE Inhibitor Pathway WP554	0.352695	0.563954	2.32964	2.42784	BDKRB1
Cells and Molecules involved in local acute inflammatory response WP4493	0.352695	0.563954	2.32964	2.42784	C7
IL-9 Signaling Pathway WP22	0.352695	0.563954	2.32964	2.42784	MAPK3
Mitochondrial LC-Fatty Acid Beta-Oxidation WP368	0.352695	0.563954	2.32964	2.42784	SCP2
miR-509-3p alteration of YAP1/ECM axis WP3967	0.352695	0.563954	2.32964	2.42784	FN1
Apoptosis WP254	0.356496	0.567153	1.41443	1.45889	CHUK;NFKBIE;TNFRSF21
Hippo-Merlin Signaling Dysregulation WP4541	0.359565	0.568783	1.32013	1.35031	NRAS;ITGA3;PTK2;EGFR
Photodynamic therapy-induced AP-1 survival signaling. WP3611	0.361132	0.568783	1.58416	1.61348	JUNB;EGFR
Estrogen metabolism WP697	0.369053	0.572669	2.20022	2.19321	STS
Simplified Depiction of MYD88 Distinct Input-Output Pathway WP3877	0.369053	0.572669	2.20022	2.19321	MYD88
TCA Cycle (aka Krebs or citric acid cycle) WP78	0.369053	0.572669	2.20022	2.19321	IDH3G
Retinoblastoma Gene in Cancer WP2446	0.377181	0.582411	1.36565	1.33155	MSH6;CDK6;RBBP7
Copper homeostasis WP3286	0.379316	0.582851	1.52323	1.4766	GSK3B;ADAM9
Extracellular vesicles in the crosstalk of cardiac cells WP4300	0.384999	0.583051	2.08442	1.98961	EGFR
Mitochondrial Gene Expression WP391	0.384999	0.583051	2.08442	1.98961	GABPB1
Serotonin Receptor 4/6/7 and NR3C Signaling WP734	0.384999	0.583051	2.08442	1.98961	MAPK3
Cardiac Progenitor Differentiation WP2406	0.388326	0.583658	1.49449	1.41365	BMP4;GSK3B
EGF/EGFR Signaling Pathway WP437	0.389105	0.583658	1.22234	1.15378	SPRY2;CBLB;PTK2;EGFR;CRKL
Hereditary leiomyomatosis and renal cell carcinoma pathway WP4206	0.400543	0.597966	1.9802	1.81175	EGLN1
Mitochondrial complex I assembly model OXPHOS system WP4324	0.414996	0.613556	1.41443	1.24397	NDUFB1;NDUFV3
Glycerophospholipid Biosynthetic Pathway WP2533	0.415694	0.613556	1.8859	1.65546	CDS2
G Protein Signaling Pathways WP35	0.418082	0.613556	1.27755	1.11412	NRAS;AKAP9;GNA12
LncRNA involvement in canonical Wnt signaling and colorectal cancer WP4258	0.424818	0.613556	1.26396	1.08207	GSK3B;CDK6;TCF3
Methionine De Novo and Salvage Pathway WP3580	0.430463	0.613556	1.80018	1.51736	MTAP
NAD+ biosynthetic pathways WP3645	0.430463	0.613556	1.80018	1.51736	TNKS
Regulation of Apoptosis by Parathyroid Hormone-related Protein WP3872	0.430463	0.613556	1.80018	1.51736	GSK3B
Transcription factor regulation in adipogenesis WP3599	0.430463	0.613556	1.80018	1.51736	PPARG
Vitamin D in inflammatory diseases WP4482	0.430463	0.613556	1.80018	1.51736	CHUK
miRNA targets in ECM and membrane receptors WP2911	0.430463	0.613556	1.80018	1.51736	FN1
B Cell Receptor Signaling Pathway WP23	0.444859	0.617316	1.22486	0.992139	GSK3B;CHUK;CRKL
EBV LMP1 signaling WP262	0.44486	0.617316	1.72191	1.39474	CHUK
Estrogen signaling pathway WP712	0.44486	0.617316	1.72191	1.39474	CHUK
Hippo-Yap signaling pathway WP4537	0.44486	0.617316	1.72191	1.39474	TNIK
Nanoparticle triggered autophagic cell death WP2509	0.44486	0.617316	1.72191	1.39474	TSC1
The human immune response to tuberculosis WP4197	0.44486	0.617316	1.72191	1.39474	PTPN2
Oxidative phosphorylation WP623	0.449621	0.620392	1.32013	1.05525	NDUFB1;NDUFV3
Notch Signaling Pathway WP61	0.458096	0.620392	1.29849	1.0137	GSK3B;HES1
Prader-Willi and Angelman Syndrome WP3998	0.458096	0.620392	1.29849	1.0137	CDK6;FEZ2
Angiogenesis WP1539	0.458893	0.620392	1.65017	1.28538	PTK2
IL1 and megakaryocytes in obesity WP2865	0.458893	0.620392	1.65017	1.28538	MYD88
Triacylglyceride Synthesis WP325	0.458893	0.620392	1.65017	1.28538	AGPAT5
MECP2 and Associated Rett Syndrome WP3584	0.466495	0.627974	1.27755	0.97414	HNRNPH1;SGK1
Glycosylation and related congenital defects. WP4521	0.472573	0.628103	1.58416	1.18743	DOLK
Hypothesized Pathways in Pathogenesis of Cardiovascular Disease WP3668	0.472573	0.628103	1.58416	1.18743	MAPK3
MTHFR deficiency WP4288	0.472573	0.628103	1.58416	1.18743	HNMT
Genotoxicity pathway WP4286	0.474816	0.628433	1.25727	0.936448	CBLB;SMAD5
Electron Transport Chain (OXPHOS system in mitochondria) WP111	0.484063	0.635106	1.15351	0.83692	NDUFB1;COX7A2;NDUFV3
Cytokines and Inflammatory Response WP530	0.485907	0.635106	1.52323	1.09937	IL15
EPO Receptor Signaling WP581	0.485907	0.635106	1.52323	1.09937	MAPK3
Brain-Derived Neurotrophic Factor (BDNF) signaling pathway WP2380	0.494598	0.641957	1.10011	0.774489	GSK3B;CHUK;SQSTM1;MAPK3
Photodynamic therapy-induced unfolded protein response WP3613	0.498904	0.641957	1.46681	1.01994	ASNS
Folate Metabolism WP176	0.4993	0.641957	1.20012	0.833541	MTHFD1;LDLR
Human Thyroid Stimulating Hormone (TSH) signaling pathway WP2032	0.4993	0.641957	1.20012	0.833541	GNA12;MAPK3
DNA Damage Response WP707	0.515211	0.654905	1.16482	0.772486	CDK6;RFC1
Thermogenesis WP4321	0.515695	0.654905	1.10011	0.728536	NRAS;TSC1;PPARG
AMP-activated Protein Kinase (AMPK) Signaling WP1403	0.52304	0.654905	1.14794	0.743978	TSC1;CAMKK2
Cannabinoid receptor signaling WP3869	0.523924	0.654905	1.36565	0.88277	MAPK3
PDGFR-beta pathway WP3972	0.523924	0.654905	1.36565	0.88277	MAPK3
Statin Pathway WP430	0.523924	0.654905	1.36565	0.88277	LDLR
T-Cell Receptor and Co-stimulatory Signaling WP2583	0.523924	0.654905	1.36565	0.88277	GSK3B
Parkin-Ubiquitin Proteasomal System pathway WP2359	0.530783	0.656919	1.13154	0.71672	PSMC6;UBE2G1
Inflammatory Response Pathway WP453	0.535963	0.656919	1.32013	0.823354	FN1
Matrix Metalloproteinases WP129	0.535963	0.656919	1.32013	0.823354	MMP3
Oligodendrocyte Specification and differentiation(including remyelination), leading to Myelin Components for CNS WP4304	0.535963	0.656919	1.32013	0.823354	BMP4
One Carbon Metabolism WP241	0.535963	0.656919	1.32013	0.823354	MTHFD1
Non-genomic actions of 1,25 dihydroxyvitamin D3 WP4341	0.538441	0.657399	1.1156	0.690645	NRAS;MAPK3
Ethanol effects on histone modifications WP3996	0.547697	0.661014	1.27755	0.769125	HDAC9
Gastric Cancer Network 2 WP2363	0.547697	0.661014	1.27755	0.769125	EGFR
Tumor suppressor activity of SMARCB1 WP4204	0.547697	0.661014	1.27755	0.769125	CDK6
VEGFA-VEGFR2 Signaling Pathway WP3888	0.550605	0.661727	1.00688	0.600843	GSK3B;PRKD2;HDAC9;PTK2;CAMKK2;MAPK3
Nonalcoholic fatty liver disease WP4396	0.552531	0.661727	1.02204	0.606319	GSK3B;NDUFB1;COX7A2;NDUFV3
Myometrial Relaxation and Contraction Pathways WP289	0.557624	0.661727	1.01549	0.593116	OXTR;IGFBP5;GABPB1;PKIG
Initiation of transcription and translation elongation at the HIV-1 LTR WP3414	0.559135	0.661727	1.23762	0.719509	HDAC9
White fat cell differentiation WP4149	0.559135	0.661727	1.23762	0.719509	PPARG
Peptide GPCRs WP24	0.560892	0.661727	1.07038	0.618921	OXTR;BDKRB1
Sudden Infant Death Syndrome (SIDS) Susceptibility Pathways WP706	0.567714	0.662877	1.00263	0.567627	TSPYL1;HES1;TCF3;HDAC9
Fluoropyrimidine Activity WP1601	0.570285	0.662877	1.20012	0.67401	TK1
Nuclear Receptors in Lipid Metabolism and Toxicity WP299	0.570285	0.662877	1.20012	0.67401	PPARG
miRNA regulation of prostate cancer signaling pathways WP3981	0.570285	0.662877	1.20012	0.67401	GSK3B
p38 MAPK Signaling Pathway WP400	0.581153	0.673027	1.16482	0.632197	DAXX
Target Of Rapamycin (TOR) Signaling WP1471	0.602074	0.6947	1.10011	0.558169	TSC1
The effect of progerin on the involved genes in Hutchinson-Gilford Progeria Syndrome WP4320	0.612139	0.703737	1.07038	0.525336	RBBP7
Amyotrophic lateral sclerosis (ALS) WP2447	0.621951	0.706462	1.04221	0.494939	DAXX
Nuclear Receptors WP170	0.621951	0.706462	1.04221	0.494939	PPARG
Striated Muscle Contraction Pathway WP383	0.621951	0.706462	1.04221	0.494939	DMD
Alzheimers Disease WP2059	0.623481	0.706462	0.954312	0.450853	GSK3B;MAPK3
G13 Signaling Pathway WP524	0.631515	0.713001	1.01549	0.466752	PIP4K2A
Glycogen Synthesis and Degradation WP500	0.640837	0.717968	0.990099	0.440574	GSK3B
Oxidative Damage WP3941	0.640837	0.717968	0.990099	0.440574	NFKBIE
Selenium Micronutrient Network WP15	0.642753	0.717968	0.921022	0.407088	TXNRD1;LDLR
Nucleotide-binding Oligomerization Domain (NOD) pathway WP1433	0.649924	0.723414	0.96595	0.416228	CHUK
Common Pathways Underlying Drug Addiction WP2636	0.658782	0.728287	0.942951	0.393553	MAPK3
Allograft Rejection WP2328	0.661238	0.728287	0.889977	0.368131	C7;CD55
Cytoplasmic Ribosomal Proteins WP477	0.661238	0.728287	0.889977	0.368131	RPS15;RPL13A
Integrated Cancer Pathway WP1971	0.675831	0.741766	0.90009	0.352666	MSH6
Notch Signaling WP268	0.684035	0.74807	0.880088	0.334211	HES1
Ras Signaling WP4223	0.686325	0.74807	0.860956	0.324067	NRAS;CHUK;EGFR;MAPK3
Selenium Metabolism and Selenoproteins WP28	0.692031	0.751689	0.860956	0.316939	TXNRD1
Thymic Stromal LymphoPoietin (TSLP) Signaling Pathway WP2203	0.699825	0.757542	0.842637	0.300759	MAPK3
Human Complement System WP2806	0.70678	0.757952	0.816577	0.283382	C7;CD55
Differentiation Pathway WP2848	0.707422	0.757952	0.825083	0.285584	BMP4
Exercise-induced Circadian Regulation WP410	0.707422	0.757952	0.825083	0.285584	ARNTL
Hepatitis C and Hepatocellular Carcinoma WP3646	0.714827	0.76329	0.808244	0.271339	MAPK3
Vitamin B12 Metabolism WP1533	0.722046	0.768393	0.792079	0.257954	LDLR
Calcium Regulation in the Cardiac Cell WP536	0.729727	0.773952	0.797395	0.251248	ATP1B3;ATP2B1;PKIG
Wnt Signaling Pathway and Pluripotency WP399	0.732571	0.774362	0.776548	0.241658	GSK3B;LDLR
Interferon type I signaling pathways WP585	0.749141	0.789228	0.733407	0.211829	CRKL
Pathogenic Escherichia coli infection WP2272	0.755492	0.793266	0.720072	0.201898	ARHGEF2
Preimplantation Embryo WP3527	0.773599	0.80958	0.682827	0.175283	ZFP36L2
TYROBP Causal Network WP3945	0.790367	0.82439	0.649245	0.15274	ZFP36L2
Lung fibrosis WP3624	0.800852	0.832319	0.628634	0.139607	FAM13A
Endochondral Ossification WP474	0.805896	0.832319	0.618812	0.13354	SERPINH1
G1 to S cell cycle control WP45	0.805896	0.832319	0.618812	0.13354	CDK6
Histone Modifications WP2369	0.820277	0.844403	0.591104	0.117105	EZH1
Metapathway biotransformation Phase I and II WP702	0.84431	0.866312	0.649245	0.109875	HNMT;HS6ST1;CHST2
DNA IR-damage and cellular response via ATR WP4016	0.871269	0.891071	0.49505	0.0682198	UBE2D3
Mesodermal Commitment Pathway WP2857	0.88888	0.904002	0.538829	0.0634701	BMP4;MEIS1
ncRNAs involved in Wnt signaling in hepatocellular carcinoma WP4336	0.889652	0.904002	0.460511	0.053845	GSK3B
GPCRs, Other WP117	0.902953	0.914567	0.435208	0.044428	GPR183
Pathways Regulating Hippo Signaling WP4540	0.918929	0.927765	0.404122	0.0341669	EGFR
Wnt Signaling WP428	0.947636	0.953691	0.344382	0.0185227	GSK3B
Endoderm Differentiation WP2853	0.973184	0.976283	0.280879	0.00763501	NME1
GPCRs, Class A Rhodopsin-like WP455	0.989623	0.989623	0.308202	0.00321501	OXTR;BDKRB1
