# Supplementary material for: Evolutionary transcriptomics implicates HAND2 in the origins of implantation and regulation of gestation length
Source: eLife. 2021 Feb 1;10:e61257. doi: 10.7554/eLife.61257 (PMC7943190; doi:10.7554/eLife.61257)
Supplement: Figure 3—source data 3. [file elife-61257-fig3-data3.xlsx]

## Sheet: Figure 3—source data 3
Figure 3—source data 3. Human phenotype (disease) ontology terms enriched among genes differentially expressed by HAND2 knockown.
Term	P-value	Adjusted P-value (FDR)	Odds Ratio	Combined Score	Genes
Submucous cleft hard palate (HP:0000176)	0.000815215	0.328852	14.8515	105.625	ZEB2;LMNA;ZMPSTE24
Premature rupture of membranes (HP:0001788)	0.000815215	0.328852	14.8515	105.625	LMNA;SERPINH1;ZMPSTE24
Congenital, generalized hypertrichosis (HP:0004540)	0.00168218	0.38195	11.8812	75.893	LMNA;SNRPE;ZMPSTE24
Reduced subcutaneous adipose tissue (HP:0003758)	0.00226984	0.38195	10.8011	65.7575	LMNA;PPARG;ZMPSTE24
Osteolytic defects of the phalanges of the hand (HP:0009771)	0.00297004	0.38195	9.90099	57.6156	ATL3;LMNA;ZMPSTE24
Osteolytic defects of the hand bones (HP:0009699)	0.00297004	0.38195	9.90099	57.6156	ATL3;LMNA;ZMPSTE24
Insulin-resistant diabetes mellitus (HP:0000831)	0.00378919	0.38195	9.13938	50.9575	LMNA;PPARG;ZMPSTE24
Abnormal glucose tolerance (HP:0001952)	0.00473296	0.38195	8.48656	45.4303	HFE;LMNA;ZMPSTE24
Skin nodule (HP:0200036)	0.00473296	0.38195	8.48656	45.4303	TSC1;LDLR;NME1
Adrenal hypoplasia (HP:0000835)	0.00473296	0.38195	8.48656	45.4303	BMP4;LMNA;ZMPSTE24
Nephrotic syndrome (HP:0000100)	0.00533485	0.391384	3.30033	17.2723	TRPC6;BBS10;ITGA3;ARHGDIA;SLC17A5;FN1;BBS7
Hypolipoproteinemia (HP:0010981)	0.00835908	0.491355	6.98893	33.4379	SAR1B;LMNA;PPARG
Hyperglycemia (HP:0003074)	0.00835908	0.491355	6.98893	33.4379	LMNA;PPARG;ZMPSTE24
External ear malformation (HP:0008572)	0.00964241	0.491355	3.30033	15.3188	BMP4;PEX11B;LMNA;TCF3;CRKL;ZMPSTE24
Abnormality of the sella turcica (HP:0002679)	0.00984542	0.491355	6.60066	30.5	BMP4;SLC17A5;DYM
Focal segmental glomerulosclerosis (HP:0000097)	0.0114755	0.491355	6.25326	27.9367	TRPC6;ITGA3;CD2AP
Premature birth (HP:0001622)	0.0124095	0.491355	3.12663	13.7237	EOGT;PEX11B;LMNA;SLC17A5;CRKL;ZMPSTE24
Bradycardia (HP:0001662)	0.0132517	0.491355	5.94059	25.6849	TSPYL1;LMNA;GLUL
Ascites (HP:0001541)	0.013357	0.491355	3.53607	15.2606	MSH6;HFE;EOGT;SLC17A5;TSC1
Thin skin (HP:0000963)	0.013357	0.491355	3.53607	15.2606	MTAP;CHUK;HFE;LMNA;ZMPSTE24
Postaxial foot polydactyly (HP:0001830)	0.0137294	0.491355	4.28151	18.3601	BMP4;IFT140;NEK1;WDR34
Patent ductus arteriosus (HP:0001643)	0.0140752	0.491355	2.53465	10.8061	ZEB2;DTNA;PIGN;EOGT;POLR1C;LMNA;AMMECR1;ZMPSTE24
Dialeptic seizures (HP:0011146)	0.0151756	0.491355	5.65771	23.6949	KCNMA1;TSC1;CHD2
Entropion (HP:0000621)	0.0161067	0.491355	9.90099	40.8764	LMNA;ZMPSTE24
Ependymoma (HP:0002888)	0.0161067	0.491355	9.90099	40.8764	MSH6;TSC1
Short nail (HP:0001799)	0.0161067	0.491355	9.90099	40.8764	LMNA;ZMPSTE24
Open mouth (HP:0000194)	0.0164394	0.491355	4.06194	16.6868	NRAS;PIGN;LMNA;ZMPSTE24
Abnormality of the level of lipoprotein cholesterol (HP:0010979)	0.0172485	0.497128	5.40054	21.9263	SAR1B;LMNA;PPARG
Microglossia (HP:0000171)	0.0203658	0.509518	8.80088	34.2697	BMP4;NEK1
Abnormal pupillary function (HP:0007686)	0.0203658	0.509518	8.80088	34.2697	STIM1;NME1
Glomerulosclerosis (HP:0000096)	0.021845	0.509518	4.9505	18.9296	TRPC6;ITGA3;CD2AP
Attention deficit hyperactivity disorder (HP:0007018)	0.0239631	0.509518	2.70027	10.0754	MSH6;STS;DYM;TSC1;CRKL;GNE
Hypoalphalipoproteinemia (HP:0003233)	0.0250367	0.509518	7.92079	29.2072	LMNA;PPARG
Abnormality of the distal phalanges of the toes (HP:0010182)	0.0250367	0.509518	7.92079	29.2072	LMNA;ZMPSTE24
Glucose intolerance (HP:0000833)	0.0250367	0.509518	7.92079	29.2072	LMNA;ZMPSTE24
Gastroesophageal reflux (HP:0002020)	0.0264803	0.509518	3.52035	12.7836	ARNT2;TSPYL1;PIGN;DDOST
Hirsutism (HP:0001007)	0.0270152	0.509518	2.95552	10.6734	BBS10;LMNA;PPARG;BBS7;GNE
Genital tract atresia (HP:0001827)	0.027044	0.509518	4.56969	16.4979	BBS10;NEK1;BBS7
Insulin resistance (HP:0000855)	0.027044	0.509518	4.56969	16.4979	LMNA;PPARG;ZMPSTE24
Dilatation of the ascending aorta (HP:0005111)	0.0298689	0.509518	4.40044	15.4497	LMNA;ZMPSTE24;CRKL
Astrocytoma (HP:0009592)	0.030096	0.509518	7.20072	25.2267	MSH6;TSC1
Abnormality of the astrocytes (HP:0100707)	0.030096	0.509518	7.20072	25.2267	MSH6;TSC1
Adactyly (HP:0009776)	0.030096	0.509518	7.20072	25.2267	EOGT;DOLK
Limb-girdle muscle atrophy (HP:0003797)	0.030096	0.509518	7.20072	25.2267	LMNA;GNE
Natal tooth (HP:0000695)	0.030096	0.509518	7.20072	25.2267	LMNA;ZMPSTE24
Toxemia of pregnancy (HP:0100603)	0.030096	0.509518	7.20072	25.2267	LMNA;PPARG
Specific learning disability (HP:0001328)	0.0304882	0.509518	3.37055	11.7646	BBS10;STIM1;TSC1;BBS7
Abnormality of the femoral head (HP:0003368)	0.032843	0.509518	4.24328	14.4951	IFT140;DYM;RAB33B
Abnormal delivery (HP:0001787)	0.032843	0.509518	4.24328	14.4951	LMNA;SERPINH1;ZMPSTE24
Osteopenia (HP:0000938)	0.0335972	0.509518	2.78901	9.46399	MTAP;UROS;SERPINH1;SLC17A5;DUSP6
Hyporeflexia of lower limbs (HP:0002600)	0.0355212	0.509518	6.60066	22.0305	STIM1;ATL3
Vertebral compression fractures (HP:0002953)	0.0355212	0.509518	6.60066	22.0305	UROS;SQSTM1
Rocker bottom foot (HP:0001838)	0.0371354	0.509518	3.16832	10.4339	LMNA;HS6ST1;DUSP6;ZMPSTE24
Narrow chest (HP:0000774)	0.0372302	0.509518	2.7126	8.92618	IFT140;LMNA;SERPINH1;NEK1;WDR34
Sparse eyelashes (HP:0000653)	0.0392348	0.509518	3.9604	12.8245	LMNA;DOLK;ZMPSTE24
Breast aplasia (HP:0100783)	0.0392348	0.509518	3.9604	12.8245	LMNA;HS6ST1;DUSP6
Dental crowding (HP:0000678)	0.0395216	0.509518	3.10619	10.0358	BBS10;LMNA;BBS7;ZMPSTE24
Azoospermia (HP:0000027)	0.0412907	0.509518	6.09292	19.4188	SCP2;HFE
Deformed sella turcica (HP:0002681)	0.0412907	0.509518	6.09292	19.4188	SLC17A5;DYM
Decreased subcutaneous fat (HP:0001002)	0.0412907	0.509518	6.09292	19.4188	LMNA;PPARG
Cutaneous photosensitivity (HP:0000992)	0.0419934	0.509518	3.04646	9.65802	MVK;HFE;UROS;CHD2
Acrocyanosis (HP:0001063)	0.0426497	0.509518	3.83264	12.091	MVK;LMNA;ZMPSTE24
EEG with generalized epileptiform discharges (HP:0011198)	0.0426497	0.509518	3.83264	12.091	KCNMA1;ASNS;DOLK
Congestive heart failure (HP:0001635)	0.0438452	0.509518	2.16584	6.77278	DTNA;HFE;LMNA;SLC17A5;TSC1;DMD;MYD88
Erectile abnormalities (HP:0100639)	0.0462084	0.509518	3.71287	11.4156	HFE;HS6ST1;DUSP6
Epileptiform EEG discharges (HP:0011182)	0.0462084	0.509518	3.71287	11.4156	KCNMA1;ASNS;DOLK
Renal cell carcinoma (HP:0005584)	0.0462084	0.509518	3.71287	11.4156	NRAS;FN1;TSC1
Hypoplasia of the corpus callosum (HP:0002079)	0.0463925	0.509518	2.30703	7.084	ARNT2;MOCS2;ZEB2;DDHD2;ASNS;GLUL
Febrile seizures (HP:0002373)	0.0473837	0.509518	5.65771	17.2531	AUH;CHD2
Absent hand (HP:0004050)	0.0473837	0.509518	5.65771	17.2531	EOGT;BTRC
Glioma (HP:0009733)	0.0473837	0.509518	5.65771	17.2531	MSH6;TSC1
Disproportionate short-trunk short stature (HP:0003521)	0.0473837	0.509518	5.65771	17.2531	DYM;RAB33B
Xanthomatosis (HP:0000991)	0.0473837	0.509518	5.65771	17.2531	LMNA;LDLR
Downslanted palpebral fissures (HP:0000494)	0.0496874	0.509518	1.89593	5.6916	ZEB2;NRAS;BBS10;MVK;ASPH;POLR1C;AMMECR1;BBS7;KPTN
Aplasia/Hypoplasia of the breasts (HP:0010311)	0.0499088	0.509518	3.60036	10.7923	LMNA;HS6ST1;DUSP6
Hypoplastic toenails (HP:0001800)	0.0499088	0.509518	3.60036	10.7923	LMNA;EOGT;ZMPSTE24
Aplasia/Hypoplasia of the lens (HP:0008063)	0.0499088	0.509518	3.60036	10.7923	BBS10;BBS7;HDAC9
Scrotal hypoplasia (HP:0000046)	0.0537489	0.509518	3.49447	10.2158	BMP4;TSPYL1;POLR1C
Abnormality of the umbilical cord (HP:0010881)	0.0537802	0.509518	5.28053	15.4342	LMNA;ZMPSTE24
Polygenic inheritance (HP:0010982)	0.0537802	0.509518	5.28053	15.4342	SERPINH1;PPARG
Ureteral duplication (HP:0000073)	0.0537802	0.509518	5.28053	15.4342	LMNA;ZMPSTE24
Postaxial hand polydactyly (HP:0001162)	0.0564732	0.509518	2.41488	6.94033	BBS10;IFT140;NEK1;BBS7;WDR34
Neuroepithelial neoplasm (HP:0030063)	0.0577265	0.509518	3.39463	9.6816	MSH6;TSC1;NME1
Benign neoplasm of the central nervous system (HP:0100835)	0.0577265	0.509518	3.39463	9.6816	MSH6;NRAS;TSC1
Osteomyelitis (HP:0002754)	0.0577265	0.509518	3.39463	9.6816	MTAP;ATL3;TCF3
Skin rash (HP:0000988)	0.0586118	0.509518	2.73131	7.74823	MVK;HFE;TCF3;GLUL
Barrel-shaped chest (HP:0001552)	0.0604611	0.509518	4.9505	13.8899	DYM;RAB33B
Absence seizures (HP:0002121)	0.0604611	0.509518	4.9505	13.8899	KCNMA1;CHD2
Polycystic kidney dysplasia (HP:0000113)	0.0616767	0.509518	2.68501	7.48004	NEK1;TSC1;WDR34;PKD1
Neuroectodermal neoplasm (HP:0030061)	0.0618391	0.509518	3.30033	9.18554	MSH6;TSC1;NME1
Nervous tissue neoplasm (HP:0030060)	0.0618391	0.509518	3.30033	9.18554	MSH6;TSC1;NME1
Ventricular arrhythmia (HP:0004308)	0.0618391	0.509518	3.30033	9.18554	DTNA;LMNA;TSC1
Malignant neoplasm of the central nervous system (HP:0100836)	0.066084	0.509518	3.21113	8.72409	MSH6;TSC1;NME1
Adenoma sebaceum (HP:0009720)	0.067408	0.509518	4.65929	12.5661	MSH6;TSC1
Median cleft lip (HP:0000161)	0.067408	0.509518	4.65929	12.5661	NEK1;WDR34
Muscle stiffness (HP:0003552)	0.067408	0.509518	4.65929	12.5661	STIM1;VAMP1
Angiofibromas (HP:0010615)	0.067408	0.509518	4.65929	12.5661	MSH6;TSC1
Absent speech (HP:0001344)	0.067408	0.509518	4.65929	12.5661	BMP4;ZEB2
Spinal rigidity (HP:0003306)	0.067408	0.509518	4.65929	12.5661	MGME1;LMNA
Hypoplasia of the odontoid process (HP:0003311)	0.067408	0.509518	4.65929	12.5661	DYM;RAB33B
Athetosis (HP:0002305)	0.067408	0.509518	4.65929	12.5661	AUH;SLC17A5
Abnormal spermatogenesis (HP:0008669)	0.067408	0.509518	4.65929	12.5661	SCP2;HFE
Abnormality of subcutaneous fat tissue (HP:0001001)	0.067408	0.509518	4.65929	12.5661	LMNA;PPARG
Facial cleft (HP:0002006)	0.067408	0.509518	4.65929	12.5661	POLR1C;WDR34
Micromelia (HP:0002983)	0.0692279	0.509518	2.27609	6.07796	IFT140;SERPINH1;NEK1;WDR34;GLUL
Congenital hepatic fibrosis (HP:0002612)	0.0704587	0.509518	3.12663	8.29409	EOGT;DOLK;WDR34
Broad foot (HP:0001769)	0.0704587	0.509518	3.12663	8.29409	BBS10;DYM;BBS7
Delayed myelination (HP:0012448)	0.0704587	0.509518	3.12663	8.29409	BMP4;ARNT2;ASNS
Choanal atresia (HP:0000453)	0.0713672	0.509518	2.55509	6.74524	POLR1C;LMNA;CRKL;ZMPSTE24
Neoplasm of striated muscle (HP:0009728)	0.0746034	0.509518	4.40044	11.4216	MSH6;TSC1
Abnormality of the calf musculature (HP:0001430)	0.0746034	0.509518	4.40044	11.4216	LMNA;DMD
Easy fatigability (HP:0003388)	0.0746034	0.509518	4.40044	11.4216	MGME1;STIM1
Congenital primary aphakia (HP:0007707)	0.0746034	0.509518	4.40044	11.4216	BBS10;BBS7
Rough bone trabeculation (HP:0100670)	0.0746034	0.509518	4.40044	11.4216	LMNA;ZMPSTE24
Thickened calvaria (HP:0002684)	0.0746034	0.509518	4.40044	11.4216	SLC17A5;DYM
Gait imbalance (HP:0002141)	0.0746034	0.509518	4.40044	11.4216	BBS10;BBS7
Prominent forehead (HP:0011220)	0.0747603	0.509518	2.51454	6.52137	ARNT2;NRAS;SERPINH1;GNE
Abnormality of the pleura (HP:0002103)	0.0749604	0.509518	3.04646	7.89275	HFE;TSC1;MYD88
Progressive disorder (HP:0003676)	0.0751334	0.509518	1.91192	4.94897	MGME1;MTAP;MOCS2;LMNA;DDHD2;SMAD9;ASNS
Hematuria (HP:0000790)	0.0817859	0.520615	2.43717	6.10181	FN1;AMMECR1;TSC1;CD2AP
Dilated cardiomyopathy (HP:0001644)	0.0817859	0.520615	2.43717	6.10181	MGME1;LMNA;DMD;DOLK
Advanced eruption of teeth (HP:0006288)	0.0820302	0.520615	4.16884	10.4249	LMNA;ZMPSTE24
Abnormality of the periventricular white matter (HP:0002518)	0.0820302	0.520615	4.16884	10.4249	DDHD2;GLUL
Metaphyseal irregularity (HP:0003025)	0.0820302	0.520615	4.16884	10.4249	SLC17A5;DYM
Secondary amenorrhea (HP:0000869)	0.0820302	0.520615	4.16884	10.4249	EIF2B3;LMNA
Short clavicles (HP:0000894)	0.0820302	0.520615	4.16884	10.4249	LMNA;ZMPSTE24
Spastic tetraplegia (HP:0002510)	0.0843326	0.520615	2.89785	7.16635	MOCS2;AUH;ASNS
Decreased testicular size (HP:0008734)	0.0891971	0.520615	2.82885	6.83708	BBS10;BBS7;HS6ST1
Left ventricular hypertrophy (HP:0001712)	0.0891971	0.520615	2.82885	6.83708	DTNA;BBS10;BBS7
Abnormal isoelectric focusing of serum transferrin (HP:0003160)	0.0896722	0.520615	3.9604	9.55087	DOLK;DDOST
Abnormal protein glycosylation (HP:0012346)	0.0896722	0.520615	3.9604	9.55087	DOLK;DDOST
Abnormal protein N-linked glycosylation (HP:0012347)	0.0896722	0.520615	3.9604	9.55087	DOLK;DDOST
Abnormal albumin level (HP:0012116)	0.0896722	0.520615	3.9604	9.55087	SAR1B;ARHGDIA
Abnormality of complement system (HP:0005339)	0.0896722	0.520615	3.9604	9.55087	C7;LMNA
Abnormality of the odontoid process (HP:0003310)	0.0896722	0.520615	3.9604	9.55087	DYM;RAB33B
Hypoalbuminemia (HP:0003073)	0.0896722	0.520615	3.9604	9.55087	SAR1B;ARHGDIA
Abnormal glycosylation (HP:0012345)	0.0896722	0.520615	3.9604	9.55087	DOLK;DDOST
Nephrogenic diabetes insipidus (HP:0009806)	0.0896722	0.520615	3.9604	9.55087	BBS10;BBS7
Generalized hypotonia (HP:0001290)	0.0896722	0.520615	3.9604	9.55087	NRAS;SERPINH1
Short thorax (HP:0010306)	0.0941764	0.542716	2.76307	6.52798	IFT140;DYM;WDR34
Micropenis (HP:0000054)	0.0958331	0.542716	2.06271	4.83735	BMP4;BBS10;NEK1;BBS7;HS6ST1
Short distal phalanx of finger (HP:0009882)	0.0967684	0.542716	2.29588	5.36188	EOGT;LMNA;CRKL;ZMPSTE24
Aplasia/Hypoplasia of the clavicles (HP:0006710)	0.097514	0.542716	3.77181	8.77986	LMNA;ZMPSTE24
Limb-girdle muscle weakness (HP:0003325)	0.097514	0.542716	3.77181	8.77986	LMNA;GNE
Medial flaring of the eyebrow (HP:0010747)	0.097514	0.542716	3.77181	8.77986	BBS10;BBS7
Memory impairment (HP:0002354)	0.100702	0.556619	2.26308	5.19511	MSH6;EIF2B3;VAMP1;MYD88
Malar flattening (HP:0000272)	0.102274	0.556675	1.69429	3.86314	BMP4;NRAS;PEX11B;POLR1C;LMNA;SERPINH1;LARP7;AMMECR1
Death in infancy (HP:0001522)	0.104466	0.556675	2.64026	5.96407	NRAS;DOLK;GLUL
Polycystic ovaries (HP:0000147)	0.104708	0.556675	2.23121	5.0349	BBS10;LMNA;PPARG;BBS7
Generalized amyotrophy (HP:0003700)	0.105541	0.556675	3.60036	8.09599	MGME1;LMNA
Short palpebral fissure (HP:0012745)	0.105541	0.556675	3.60036	8.09599	LMNA;ZMPSTE24
Bifid scrotum (HP:0000048)	0.105541	0.556675	3.60036	8.09599	BMP4;ZEB2
CNS hypomyelination (HP:0003429)	0.105541	0.556675	3.60036	8.09599	EIF2B3;GLUL
High palate (HP:0000218)	0.1118	0.558806	1.6588	3.63452	BMP4;BBS10;PIGN;LMNA;SLC17A5;DDHD2;BBS7;GNE
Hereditary nonpolyposis colorectal carcinoma (HP:0006716)	0.113738	0.558806	3.44382	7.48639	MSH6;NRAS
Bowel incontinence (HP:0002607)	0.113738	0.558806	3.44382	7.48639	DDHD2;CRKL
Neuroblastoma (HP:0003006)	0.113738	0.558806	3.44382	7.48639	MSH6;NME1
Poor coordination (HP:0002370)	0.113738	0.558806	3.44382	7.48639	BBS10;BBS7
Hypergonadotropic hypogonadism (HP:0000815)	0.113738	0.558806	3.44382	7.48639	SCP2;LMNA
Neuroblastic tumors (HP:0004376)	0.113738	0.558806	3.44382	7.48639	MSH6;NME1
Abnormal trabecular bone morphology (HP:0100671)	0.113738	0.558806	3.44382	7.48639	LMNA;ZMPSTE24
Pathologic fracture (HP:0002756)	0.113738	0.558806	3.44382	7.48639	MTAP;UROS
Primitive neuroectodermal tumor (HP:0030065)	0.113738	0.558806	3.44382	7.48639	MSH6;NME1
Peripheral primitive neuroectodermal neoplasm (HP:0030067)	0.113738	0.558806	3.44382	7.48639	MSH6;NME1
Brachydactyly syndrome (HP:0001156)	0.114254	0.558806	1.65017	3.57976	BMP4;NRAS;BBS10;IFT140;EOGT;BBS7;WDR34;CRKL
Preaxial hand polydactyly (HP:0001177)	0.115176	0.559921	2.52791	5.46356	BMP4;NEK1;WDR34
Stillbirth (HP:0003826)	0.122091	0.569525	3.30033	6.94054	LMNA;ZMPSTE24
Abnormality of purine metabolism (HP:0004352)	0.122091	0.569525	3.30033	6.94054	MOCS2;PPARG
Severe muscular hypotonia (HP:0006829)	0.122091	0.569525	3.30033	6.94054	BMP4;LMNA
Aplasia/Hypoplasia of the tongue (HP:0010295)	0.122091	0.569525	3.30033	6.94054	BMP4;NEK1
Abnormal large intestine physiology (HP:0012700)	0.122091	0.569525	3.30033	6.94054	DDHD2;CRKL
Cellulitis (HP:0100658)	0.122091	0.569525	3.30033	6.94054	LMNA;TCF3
Mitral regurgitation (HP:0001653)	0.122091	0.569525	3.30033	6.94054	DTNA;LMNA
Pectus carinatum (HP:0000768)	0.125787	0.573587	2.08442	4.32134	ZEB2;NRAS;DYM;RAB33B
Convex nasal ridge (HP:0000444)	0.126278	0.573587	2.42473	5.01742	ASPH;LMNA;ZMPSTE24
Migraine (HP:0002076)	0.126873	0.573587	1.8859	3.89357	MSH6;MVK;STIM1;PEX11B;MYD88
Vaginal atresia (HP:0000148)	0.130589	0.573587	3.16832	6.44974	BBS10;BBS7
Acanthosis nigricans (HP:0000956)	0.130589	0.573587	3.16832	6.44974	LMNA;PPARG
Decreased skull ossification (HP:0004331)	0.130589	0.573587	3.16832	6.44974	LMNA;ZMPSTE24
EMG: myopathic abnormalities (HP:0003458)	0.130589	0.573587	3.16832	6.44974	LMNA;GNE
Abnormalities of placenta or umbilical cord (HP:0001194)	0.130589	0.573587	3.16832	6.44974	LMNA;ZMPSTE24
Prominent nose (HP:0000448)	0.130589	0.573587	3.16832	6.44974	STIM1;ASPH
Wide nose (HP:0000445)	0.130589	0.573587	3.16832	6.44974	ASPH;LARP7
Hepatomegaly (HP:0002240)	0.130781	0.573587	1.44452	2.93849	MSH6;NRAS;MVK;AUH;IFT140;HFE;PEX11B;LMNA;SLC17A5;DOLK;MYD88;GNE
Pulmonary hypoplasia (HP:0002089)	0.137746	0.590902	2.32964	4.61815	LMNA;NEK1;ZMPSTE24
Asthma (HP:0002099)	0.137746	0.590902	2.32964	4.61815	TSPYL1;BBS10;BBS7
High forehead (HP:0000348)	0.138131	0.590902	1.83352	3.62954	BMP4;NRAS;STIM1;PEX11B;SERPINH1
Abnormality of the epiphysis of the femoral head (HP:0010574)	0.139218	0.590902	3.04646	6.00675	IFT140;DYM
Glomerulopathy (HP:0100820)	0.143609	0.590902	2.28484	4.43411	LMNA;FN1;AMMECR1
Broad nasal tip (HP:0000455)	0.147966	0.590902	2.93363	5.6055	NRAS;KPTN
Deeply set eye (HP:0000490)	0.148488	0.590902	1.95575	3.73011	ARNT2;ZEB2;STIM1;CRKL
Retinitis pigmentosa (HP:0000510)	0.148488	0.590902	1.95575	3.73011	BBS10;MVK;IFT140;BBS7
Abnormality of femoral epiphyses (HP:0006499)	0.156821	0.590902	2.82885	5.24087	IFT140;DYM
Abnormality of skull ossification (HP:0002703)	0.156821	0.590902	2.82885	5.24087	LMNA;ZMPSTE24
Multifactorial inheritance (HP:0001426)	0.156821	0.590902	2.82885	5.24087	SERPINH1;PPARG
Malignant gastrointestinal tract tumors (HP:0006749)	0.156821	0.590902	2.82885	5.24087	MSH6;NRAS
Gastrointestinal carcinoma (HP:0002672)	0.156821	0.590902	2.82885	5.24087	MSH6;NRAS
Abnormality involving the epiphyses of the lower limbs (HP:0006500)	0.156821	0.590902	2.82885	5.24087	IFT140;DYM
Postnatal microcephaly (HP:0005484)	0.156821	0.590902	2.82885	5.24087	EIF2B3;DOLK
Lipoatrophy (HP:0100578)	0.161669	0.590902	2.16022	3.93636	LMNA;DMD;DOLK
Hypospadias (HP:0000047)	0.16281	0.590902	1.8859	3.42323	BMP4;ZEB2;LMNA;ZMPSTE24
Cryptorchidism (HP:0000028)	0.164797	0.590902	1.35845	2.44933	ARNT2;TSPYL1;PEX11B;WDR34;HS6ST1;DUSP6;BMP4;ZEB2;NRAS;STS;BBS10;POLR1C;BBS7
Hamartoma (HP:0010566)	0.165774	0.590902	2.73131	4.90852	NRAS;TSC1
Hypergammaglobulinemia (HP:0010702)	0.165774	0.590902	2.73131	4.90852	MVK;MYD88
Pulmonary infiltrates (HP:0002113)	0.165774	0.590902	2.73131	4.90852	TSC1;MYD88
Proteinuria (HP:0000093)	0.166004	0.590902	1.72191	3.09211	TRPC6;ARHGDIA;FN1;AMMECR1;CD2AP
Recurrent fractures (HP:0002757)	0.166004	0.590902	1.72191	3.09211	MTAP;UROS;HS6ST1;SQSTM1;DUSP6
Full cheeks (HP:0000293)	0.174068	0.590902	2.08442	3.64421	MOCS2;NRAS;LMNA
Hypertriglyceridemia (HP:0002155)	0.174812	0.590902	2.64026	4.60473	LMNA;PPARG
Aplasia/Hypoplasia of the nipples (HP:0006709)	0.174812	0.590902	2.64026	4.60473	DOLK;GNE
Ectopia lentis (HP:0001083)	0.174812	0.590902	2.64026	4.60473	MOCS2;ASPH
Hypsarrhythmia (HP:0002521)	0.174812	0.590902	2.64026	4.60473	ASNS;DOLK
Sudden cardiac death (HP:0001645)	0.18264	0.590902	1.80018	3.06074	TSPYL1;DTNA;HFE;LMNA
Developmental regression (HP:0002376)	0.183372	0.590902	1.57367	2.66932	MSH6;EIF2B3;PEX11B;LMNA;SLC2A3;CHD2
Aplasia/Hypoplasia of the middle phalanges of the hand (HP:0009843)	0.183927	0.590902	2.55509	4.32633	BMP4;LMNA
Abnormality of saccadic eye movements (HP:0000570)	0.183927	0.590902	2.55509	4.32633	SCP2;VAMP1
Fibroma (HP:0010614)	0.183927	0.590902	2.55509	4.32633	MSH6;TSC1
Spastic paraplegia (HP:0001258)	0.183927	0.590902	2.55509	4.32633	DDHD2;VAMP1
Prenatal maternal abnormality (HP:0002686)	0.183927	0.590902	2.55509	4.32633	LMNA;PPARG
Hypobetalipoproteinemia (HP:0003563)	0.185051	0.590902	4.9505	8.3521	SAR1B
Peritonitis (HP:0002586)	0.185051	0.590902	4.9505	8.3521	MVK
Elevated erythrocyte sedimentation rate (HP:0003565)	0.185051	0.590902	4.9505	8.3521	MVK
Conjugated hyperbilirubinemia (HP:0002908)	0.185051	0.590902	4.9505	8.3521	SLC17A5
Cutaneous melanoma (HP:0012056)	0.185051	0.590902	4.9505	8.3521	NRAS
Neoplasm of the heart (HP:0100544)	0.185051	0.590902	4.9505	8.3521	TSC1
Increased density of long bones (HP:0006392)	0.185051	0.590902	4.9505	8.3521	MTAP
Distal lower limb amyotrophy (HP:0008944)	0.185051	0.590902	4.9505	8.3521	LMNA
Asymmetry of the thorax (HP:0001555)	0.185051	0.590902	4.9505	8.3521	NRAS
Multiple enchondromatosis (HP:0005701)	0.185051	0.590902	4.9505	8.3521	POLR1C
Sensory axonal neuropathy (HP:0003390)	0.185051	0.590902	4.9505	8.3521	ATL3
Syringomyelia (HP:0003396)	0.185051	0.590902	4.9505	8.3521	NRAS
Hypothermia (HP:0002045)	0.185051	0.590902	4.9505	8.3521	TSPYL1
Mesangial abnormality (HP:0001966)	0.185051	0.590902	4.9505	8.3521	ARHGDIA
Spinal cord lesions (HP:0100561)	0.185051	0.590902	4.9505	8.3521	NRAS
Agnosia (HP:0010524)	0.185051	0.590902	4.9505	8.3521	MSH6
Testicular atrophy (HP:0000029)	0.185051	0.590902	4.9505	8.3521	HFE
Upper limb muscle weakness (HP:0003484)	0.185051	0.590902	4.9505	8.3521	LMNA
Cortical dysplasia (HP:0002539)	0.185051	0.590902	4.9505	8.3521	ASNS
Abnormality of lateral ventricle (HP:0030047)	0.185051	0.590902	4.9505	8.3521	NEK1
Axonal loss (HP:0003447)	0.185051	0.590902	4.9505	8.3521	MOCS2
Metaphyseal dysplasia (HP:0100255)	0.185051	0.590902	4.9505	8.3521	NEK1
J-shaped sella turcica (HP:0002680)	0.185051	0.590902	4.9505	8.3521	SLC17A5
Aplasia involving bones of the upper limbs (HP:0009823)	0.185051	0.590902	4.9505	8.3521	LMNA
Aplasia involving bones of the extremities (HP:0009825)	0.185051	0.590902	4.9505	8.3521	LMNA
Carpal bone hypoplasia (HP:0001498)	0.185051	0.590902	4.9505	8.3521	DYM
Aplasia of the phalanges of the hand (HP:0009802)	0.185051	0.590902	4.9505	8.3521	LMNA
Vacuolated lymphocytes (HP:0001922)	0.185051	0.590902	4.9505	8.3521	SLC17A5
Exercise-induced myalgia (HP:0003738)	0.185051	0.590902	4.9505	8.3521	STIM1
Primary amenorrhea (HP:0000786)	0.186724	0.590902	2.01376	3.37934	PPARG;HS6ST1;DUSP6
Fibrous tissue neoplasm (HP:0012316)	0.193108	0.590902	2.47525	4.07056	MSH6;TSC1
Atrial fibrillation (HP:0005110)	0.193108	0.590902	2.47525	4.07056	DTNA;LMNA
Short metatarsal (HP:0010743)	0.193108	0.590902	2.47525	4.07056	DYM;RAB33B
Pyloric stenosis (HP:0002021)	0.19961	0.590902	1.94774	3.13856	PEX11B;SERPINH1;CRKL
Sporadic (HP:0003745)	0.19961	0.590902	1.94774	3.13856	NRAS;TSC1;NME1
Abdominal distention (HP:0003270)	0.202347	0.590902	2.40024	3.83504	ZEB2;GNE
Malnutrition (HP:0004395)	0.205637	0.590902	4.40044	6.95993	SAR1B
Tetraparesis (HP:0002273)	0.205637	0.590902	4.40044	6.95993	SQSTM1
Delayed CNS myelination (HP:0002188)	0.205637	0.590902	4.40044	6.95993	BMP4
Epidermoid cyst (HP:0200040)	0.205637	0.590902	4.40044	6.95993	LDLR
Long foot (HP:0001833)	0.205637	0.590902	4.40044	6.95993	ASNS
Increased connective tissue (HP:0009025)	0.205637	0.590902	4.40044	6.95993	LMNA
Cerebral aneurysm (HP:0004944)	0.205637	0.590902	4.40044	6.95993	PKD1
Hypoplasia of the capital femoral epiphysis (HP:0003090)	0.205637	0.590902	4.40044	6.95993	IFT140
Abnormality of proline metabolism (HP:0010907)	0.205637	0.590902	4.40044	6.95993	SQSTM1
Hydroxyprolinuria (HP:0003080)	0.205637	0.590902	4.40044	6.95993	SQSTM1
Oligomenorrhea (HP:0000876)	0.205637	0.590902	4.40044	6.95993	PPARG
Distal lower limb muscle weakness (HP:0009053)	0.205637	0.590902	4.40044	6.95993	LMNA
Midface retrusion (HP:0011800)	0.206131	0.590902	1.91632	3.02634	BMP4;LMNA;SERPINH1
Muscular dystrophy (HP:0003560)	0.211634	0.590902	2.32964	3.6177	LMNA;DMD
Absent toe (HP:0010760)	0.211634	0.590902	2.32964	3.6177	EOGT;DOLK
Venous abnormality (HP:0002624)	0.211634	0.590902	2.32964	3.6177	LMNA;PPARG
Paraplegia (HP:0010550)	0.211634	0.590902	2.32964	3.6177	DDHD2;VAMP1
Cutis marmorata (HP:0000965)	0.211634	0.590902	2.32964	3.6177	EOGT;MYD88
Urticaria (HP:0001025)	0.211634	0.590902	2.32964	3.6177	MVK;MYD88
Lack of skin elasticity (HP:0100679)	0.211634	0.590902	2.32964	3.6177	LMNA;ZMPSTE24
Delayed cranial suture closure (HP:0000270)	0.211634	0.590902	2.32964	3.6177	LMNA;ZMPSTE24
Hypermelanotic macule (HP:0001034)	0.219312	0.590902	1.85644	2.81669	MSH6;MVK;TSC1
Thickened nuchal skin fold (HP:0000474)	0.220962	0.590902	2.26308	3.41673	NRAS;PEX11B
Abnormality of the pupil (HP:0000615)	0.220962	0.590902	2.26308	3.41673	STIM1;NME1
Abnormality of nucleobase metabolism (HP:0010932)	0.220962	0.590902	2.26308	3.41673	MOCS2;PPARG
Primary atrial arrhythmia (HP:0001692)	0.220962	0.590902	2.26308	3.41673	DTNA;LMNA
Flat acetabular roof (HP:0003180)	0.225703	0.590902	3.9604	5.89518	DYM
Bell-shaped thorax (HP:0001591)	0.225703	0.590902	3.9604	5.89518	WDR34
Recurrent gram-negative bacterial infections (HP:0005420)	0.225703	0.590902	3.9604	5.89518	C7
Shoulder girdle muscle weakness (HP:0003547)	0.225703	0.590902	3.9604	5.89518	LMNA
Autoimmune hemolytic anemia (HP:0001890)	0.225703	0.590902	3.9604	5.89518	STIM1
Progressive external ophthalmoplegia (HP:0000590)	0.225703	0.590902	3.9604	5.89518	MGME1
Stridor (HP:0010307)	0.225703	0.590902	3.9604	5.89518	TSPYL1
Ankyloglossia (HP:0010296)	0.225703	0.590902	3.9604	5.89518	CRKL
Lower limb amyotrophy (HP:0007210)	0.225703	0.590902	3.9604	5.89518	LMNA
Atonic seizures (HP:0010819)	0.225703	0.590902	3.9604	5.89518	CHD2
Arthropathy (HP:0003040)	0.225703	0.590902	3.9604	5.89518	HFE
Increased IgM level (HP:0003496)	0.225703	0.590902	3.9604	5.89518	MYD88
Tongue fasciculations (HP:0001308)	0.225703	0.590902	3.9604	5.89518	TSPYL1
Abnormality of the axillary hair (HP:0100134)	0.225703	0.590902	3.9604	5.89518	SNRPE
Pelvic girdle muscle weakness (HP:0003749)	0.225703	0.590902	3.9604	5.89518	LMNA
Aplasia/Hypoplasia of metatarsal bones (HP:0001964)	0.230322	0.590902	2.20022	3.23053	DYM;RAB33B
Abnormality of the pericardium (HP:0001697)	0.230322	0.590902	2.20022	3.23053	LMNA;TSC1
Abnormality of the middle phalanges of the hand (HP:0009833)	0.230322	0.590902	2.20022	3.23053	BMP4;LMNA
Aplasia/Hypoplasia involving the vertebral column (HP:0008518)	0.230322	0.590902	2.20022	3.23053	DYM;RAB33B
Supraventricular tachycardia (HP:0004755)	0.230322	0.590902	2.20022	3.23053	DTNA;LMNA
Intellectual disability, mild (HP:0001256)	0.23266	0.590902	1.80018	2.62498	NRAS;PEX11B;DMD
Triangular face (HP:0000325)	0.23266	0.590902	1.80018	2.62498	NRAS;MVK;SERPINH1
Cerebellar hypoplasia (HP:0001321)	0.239388	0.590902	1.77331	2.53525	BMP4;MGME1;ASNS
Supraventricular arrhythmia (HP:0005115)	0.239707	0.590902	2.14075	3.05772	DTNA;LMNA
Stage 5 chronic kidney disease (HP:0003774)	0.239707	0.590902	2.14075	3.05772	IFT140;FN1
Lymphedema (HP:0001004)	0.239707	0.590902	2.14075	3.05772	NRAS;TSC1
Neoplasm of the respiratory system (HP:0100606)	0.239707	0.590902	2.14075	3.05772	MSH6;EGFR
Abnormality of the hip-girdle musculature (HP:0001445)	0.245264	0.590902	3.60036	5.06002	LMNA
Short tibia (HP:0005736)	0.245264	0.590902	3.60036	5.06002	NEK1
Cerebral hypomyelination (HP:0006808)	0.245264	0.590902	3.60036	5.06002	EIF2B3
Muscle fibrillation (HP:0010546)	0.245264	0.590902	3.60036	5.06002	TSPYL1
Curly hair (HP:0002212)	0.245264	0.590902	3.60036	5.06002	NRAS
Lymphangioma (HP:0100764)	0.245264	0.590902	3.60036	5.06002	TSC1
Rimmed vacuoles (HP:0003805)	0.245264	0.590902	3.60036	5.06002	GNE
Interstitial pulmonary disease (HP:0006530)	0.245264	0.590902	3.60036	5.06002	ITGA3
Abnormality of secondary sexual hair (HP:0009888)	0.245264	0.590902	3.60036	5.06002	SNRPE
Large earlobe (HP:0009748)	0.245264	0.590902	3.60036	5.06002	ZEB2
Abnormality of the costochondral junction (HP:0000919)	0.245264	0.590902	3.60036	5.06002	DYM
Hypoplasia of the pons (HP:0012110)	0.245264	0.590902	3.60036	5.06002	ASNS
Aplasia/Hypoplasia involving the carpal bones (HP:0006502)	0.245264	0.590902	3.60036	5.06002	DYM
Albinism (HP:0001022)	0.245264	0.590902	3.60036	5.06002	HPS5
Myocardial infarction (HP:0001658)	0.245264	0.590902	3.60036	5.06002	LMNA
Abnormality of the musculature of the pelvis (HP:0001469)	0.245264	0.590902	3.60036	5.06002	LMNA
Irregular epiphyses (HP:0010582)	0.245264	0.590902	3.60036	5.06002	DYM
Aplasia/Hypoplasia of the capital femoral epiphysis (HP:0005003)	0.245264	0.590902	3.60036	5.06002	IFT140
Postnatal growth retardation (HP:0008897)	0.246148	0.590902	1.74723	2.44931	LMNA;DYM;PSPH
Kyphoscoliosis (HP:0002751)	0.246148	0.590902	1.74723	2.44931	MVK;LMNA;ZMPSTE24
Polyhydramnios (HP:0001561)	0.246181	0.590902	1.58416	2.2205	PIGN;LMNA;WDR34;ZMPSTE24
Uterine neoplasm (HP:0010784)	0.24911	0.590902	2.08442	2.89705	MSH6;NRAS
Short ribs (HP:0000773)	0.24911	0.590902	2.08442	2.89705	IFT140;NEK1
Increased intracranial pressure (HP:0002516)	0.24911	0.590902	2.08442	2.89705	MSH6;TSC1
Abnormal epiphyseal ossification (HP:0010656)	0.24911	0.590902	2.08442	2.89705	PEX11B;DYM
Abnormality of intracranial pressure (HP:0012640)	0.24911	0.590902	2.08442	2.89705	MSH6;TSC1
Cardiomegaly (HP:0001640)	0.24911	0.590902	2.08442	2.89705	HFE;SLC17A5
Pulmonic stenosis (HP:0001642)	0.24911	0.590902	2.08442	2.89705	NRAS;ZEB2
Multicystic kidney dysplasia (HP:0000003)	0.251691	0.590902	1.56847	2.16379	BBS10;PEX11B;TSC1;BBS7
Autosomal recessive inheritance (HP:0000007)	0.255233	0.590902	1.10394	1.50752	MOCS2;MVK;SAR1B;PIGN;HFE;PEX11B;EGFR;ZMPSTE24;LMAN1;C7;AUH;ARHGDIA;LMNA;SERPINH1;SLC17A5;NEK1;DYM;BBS7;GLUL;PSPH;MGME1;EIF2B3;TSPYL1;CEP135;CHUK;IFT140;UROS;RDX;DDHD2;LARP7;ASNS;DOLK;HPS5;WDR34;DDOST;RAB33B;MSH6;PDP1;BBS10;ARL2BP;STIM1;ASPH;POLR1C;EOGT;ADAM9;KPTN;ISCU;GNE
Splenomegaly (HP:0001744)	0.258254	0.590902	1.32566	1.79469	MVK;HFE;UROS;LMNA;SLC17A5;DOLK;MYD88;GNE
Aneurysm (HP:0002617)	0.258523	0.590902	2.03097	2.74744	TSC1;PKD1
Neoplasm of the thyroid gland (HP:0100031)	0.258523	0.590902	2.03097	2.74744	MSH6;NRAS
Neoplasm of the liver (HP:0002896)	0.258523	0.590902	2.03097	2.74744	MSH6;HFE
Lymphoma (HP:0002665)	0.259755	0.590902	1.69731	2.28801	MSH6;NRAS;MYD88
Abnormal blistering of the skin (HP:0008066)	0.259755	0.590902	1.69731	2.28801	ITGA3;HFE;UROS
Pruritus (HP:0000989)	0.259755	0.590902	1.69731	2.28801	NRAS;MVK;SNRPE
Nausea (HP:0002018)	0.264332	0.590902	3.30033	4.39126	MGME1
Absent epiphyses (HP:0010577)	0.264332	0.590902	3.30033	4.39126	IFT140
Abnormality of the columella (HP:0009929)	0.264332	0.590902	3.30033	4.39126	ZEB2
Abnormal activity of mitochondrial respiratory chain (HP:0011922)	0.264332	0.590902	3.30033	4.39126	ISCU
Supranuclear gaze palsy (HP:0000605)	0.264332	0.590902	3.30033	4.39126	VAMP1
Decreased activity of mitochondrial respiratory chain (HP:0008972)	0.264332	0.590902	3.30033	4.39126	ISCU
Cone-rod dystrophy (HP:0000548)	0.264332	0.590902	3.30033	4.39126	ADAM9
Down-sloping shoulders (HP:0200021)	0.264332	0.590902	3.30033	4.39126	LMNA
Achilles tendon contracture (HP:0001771)	0.264332	0.590902	3.30033	4.39126	LMNA
Abnormality of dentin (HP:0010299)	0.264332	0.590902	3.30033	4.39126	SERPINH1
Medulloblastoma (HP:0002885)	0.264332	0.590902	3.30033	4.39126	MSH6
Asplenia (HP:0001746)	0.264332	0.590902	3.30033	4.39126	STIM1
Abnormality of the pons (HP:0007361)	0.264332	0.590902	3.30033	4.39126	ASNS
Shallow orbits (HP:0000586)	0.264332	0.590902	3.30033	4.39126	SERPINH1
Aplasia/Hypoplasia of the tibia (HP:0005772)	0.264332	0.590902	3.30033	4.39126	NEK1
Spinal cord compression (HP:0002176)	0.264332	0.590902	3.30033	4.39126	NME1
Atresia of the external auditory canal (HP:0000413)	0.267941	0.594034	1.9802	2.6079	BMP4;POLR1C
Polyneuropathy (HP:0001271)	0.267941	0.594034	1.9802	2.6079	PEX11B;MYD88
Pointed chin (HP:0000307)	0.267941	0.594034	1.9802	2.6079	ZEB2;CRKL
Platyspondyly (HP:0000926)	0.273457	0.596123	1.65017	2.13962	SERPINH1;DYM;RAB33B
Bone pain (HP:0002653)	0.277357	0.596123	1.9319	2.47757	SQSTM1;NME1
Waddling gait (HP:0002515)	0.277357	0.596123	1.9319	2.47757	DYM;DMD
Underdeveloped nasal alae (HP:0000430)	0.277357	0.596123	1.9319	2.47757	BMP4;CRKL
Broad ribs (HP:0000885)	0.282918	0.596123	3.04646	3.84645	SERPINH1
Hamartoma of the eye (HP:0010568)	0.282918	0.596123	3.04646	3.84645	TSC1
Pulmonary artery stenosis (HP:0004415)	0.282918	0.596123	3.04646	3.84645	ZEB2
Aplasia/Hypoplasia of the spleen (HP:0010451)	0.282918	0.596123	3.04646	3.84645	STIM1
Hypoplastic left heart (HP:0004383)	0.282918	0.596123	3.04646	3.84645	DTNA
Difficulty climbing stairs (HP:0003551)	0.282918	0.596123	3.04646	3.84645	LMNA
Hypoplasia of the iris (HP:0007676)	0.282918	0.596123	3.04646	3.84645	STIM1
Thoracic kyphosis (HP:0002942)	0.282918	0.596123	3.04646	3.84645	DYM
Abnormality of the Achilles tendon (HP:0005109)	0.282918	0.596123	3.04646	3.84645	LMNA
Fair hair (HP:0002286)	0.282918	0.596123	3.04646	3.84645	SLC17A5
Rhabdomyosarcoma (HP:0002859)	0.282918	0.596123	3.04646	3.84645	MSH6
Increased intramyocellular lipid droplets (HP:0012240)	0.282918	0.596123	3.04646	3.84645	ISCU
Beaking of vertebral bodies (HP:0004568)	0.282918	0.596123	3.04646	3.84645	DYM
Alveolar cell carcinoma (HP:0006519)	0.282918	0.596123	3.04646	3.84645	EGFR
Trismus (HP:0000211)	0.282918	0.596123	3.04646	3.84645	POLR1C
Ventricular septal defect (HP:0001629)	0.285866	0.599886	1.35014	1.69068	ZEB2;DTNA;EOGT;PEX11B;NEK1;CRKL
Stereotypic behavior (HP:0000733)	0.286765	0.599886	1.8859	2.35567	KPTN;CRKL
Arthralgia (HP:0002829)	0.290897	0.599886	1.46681	1.8112	MVK;LMNA;PTPN2;ZMPSTE24
Weight loss (HP:0001824)	0.290897	0.599886	1.46681	1.8112	MSH6;LMNA;ZMPSTE24;NME1
Genu valgum (HP:0002857)	0.294139	0.599886	1.58416	1.93854	SERPINH1;DYM;RAB33B
Vertigo (HP:0002321)	0.296159	0.599886	1.84204	2.24151	MVK;MYD88
Dolichocephaly (HP:0000268)	0.29657	0.599886	1.45336	1.76651	MVK;PEX11B;DYM;KPTN
Polycythemia (HP:0001901)	0.301036	0.599886	2.82885	3.39611	EGLN1
Increased variability in muscle fiber diameter (HP:0003557)	0.301036	0.599886	2.82885	3.39611	STIM1
Neoplasm of the tracheobronchial system (HP:0100552)	0.301036	0.599886	2.82885	3.39611	EGFR
Abnormality of the intrinsic pathway (HP:0010989)	0.301036	0.599886	2.82885	3.39611	LMAN1
Biliary tract neoplasm (HP:0100574)	0.301036	0.599886	2.82885	3.39611	MSH6
Progressive cerebellar ataxia (HP:0002073)	0.301036	0.599886	2.82885	3.39611	MVK
Cerebral palsy (HP:0100021)	0.301036	0.599886	2.82885	3.39611	HFE
Long toe (HP:0010511)	0.301036	0.599886	2.82885	3.39611	GNE
Relative macrocephaly (HP:0004482)	0.301036	0.599886	2.82885	3.39611	SERPINH1
Protruding tongue (HP:0010808)	0.301036	0.599886	2.82885	3.39611	CHUK
Neoplasm of the oral cavity (HP:0100649)	0.301036	0.599886	2.82885	3.39611	MSH6
Hemiparesis (HP:0001269)	0.301036	0.599886	2.82885	3.39611	TSC1
Abnormality of oral frenula (HP:0000190)	0.301036	0.599886	2.82885	3.39611	CRKL
Type I transferrin isoform profile (HP:0003642)	0.301036	0.599886	2.82885	3.39611	DDOST
Sloping forehead (HP:0000340)	0.301058	0.599886	1.56331	1.87668	CEP135;DYM;ASNS
Iris coloboma (HP:0000612)	0.302257	0.600791	1.44014	1.7231	BMP4;ZEB2;POLR1C;TSC1
Urinary incontinence (HP:0000020)	0.305535	0.602853	1.80018	2.13446	AUH;DDHD2
Split hand (HP:0001171)	0.305535	0.602853	1.80018	2.13446	EOGT;BTRC
Precocious puberty (HP:0000826)	0.305535	0.602853	1.80018	2.13446	LMNA;TSC1
Short nose (HP:0003196)	0.309142	0.605151	1.3563	1.59224	MOCS2;NRAS;PIGN;LMNA;ZMPSTE24
Osteoporosis (HP:0000939)	0.314917	0.605151	1.52323	1.76001	HFE;LMNA;DUSP6
Mildly elevated creatine phosphokinase (HP:0008180)	0.318698	0.605151	2.64026	3.01917	LMNA
Abnormality of the pubic bones (HP:0003172)	0.318698	0.605151	2.64026	3.01917	DYM
Hypoplastic nipples (HP:0002557)	0.318698	0.605151	2.64026	3.01917	GNE
Brushfield spots (HP:0001088)	0.318698	0.605151	2.64026	3.01917	PEX11B
Areflexia of lower limbs (HP:0002522)	0.318698	0.605151	2.64026	3.01917	STIM1
Abnormality of the salivary glands (HP:0010286)	0.318698	0.605151	2.64026	3.01917	MSH6
Anal stenosis (HP:0002025)	0.318698	0.605151	2.64026	3.01917	PIGN
Glossoptosis (HP:0000162)	0.318698	0.605151	2.64026	3.01917	POLR1C
Abnormality of the diencephalon (HP:0010662)	0.318698	0.605151	2.64026	3.01917	SCP2
Abnormality of glutamine family amino acid metabolism (HP:0010902)	0.318698	0.605151	2.64026	3.01917	SQSTM1
Slow saccadic eye movements (HP:0000514)	0.318698	0.605151	2.64026	3.01917	VAMP1
Complement deficiency (HP:0004431)	0.318698	0.605151	2.64026	3.01917	C7
Maternal diabetes (HP:0009800)	0.318698	0.605151	2.64026	3.01917	PPARG
Increased muscle lipid content (HP:0009058)	0.318698	0.605151	2.64026	3.01917	ISCU
Heterogeneous (HP:0001425)	0.324027	0.607807	1.32899	1.49768	LMNA;SQSTM1;PKD1;ZMPSTE24;NME1
Vasculitis (HP:0002633)	0.324211	0.607807	1.72191	1.9395	MVK;MYD88
Omphalocele (HP:0001539)	0.324211	0.607807	1.72191	1.9395	CHUK;WDR34
Dental malocclusion (HP:0000689)	0.335722	0.607807	1.46681	1.60098	ASPH;POLR1C;HDAC9
Pancreatic fibrosis (HP:0100732)	0.335913	0.607807	2.47525	2.70025	NEK1
Truncus arteriosus (HP:0001660)	0.335913	0.607807	2.47525	2.70025	CRKL
Abnormal cartilage morphology (HP:0002763)	0.335913	0.607807	2.47525	2.70025	POLR1C
Testicular neoplasm (HP:0010788)	0.335913	0.607807	2.47525	2.70025	STS
Cortical visual impairment (HP:0100704)	0.335913	0.607807	2.47525	2.70025	ASNS
Dysphonia (HP:0001618)	0.335913	0.607807	2.47525	2.70025	MGME1
Hyperuricemia (HP:0002149)	0.335913	0.607807	2.47525	2.70025	PPARG
Visceral angiomatosis (HP:0100761)	0.335913	0.607807	2.47525	2.70025	TSC1
Hypoplastic heart (HP:0001961)	0.335913	0.607807	2.47525	2.70025	DTNA
Palpitations (HP:0001962)	0.335913	0.607807	2.47525	2.70025	ISCU
Broad palm (HP:0001169)	0.335913	0.607807	2.47525	2.70025	DYM
Sleep apnea (HP:0010535)	0.335913	0.607807	2.47525	2.70025	GNE
Protuberant abdomen (HP:0001538)	0.335913	0.607807	2.47525	2.70025	GNE
Steatorrhea (HP:0002570)	0.335913	0.607807	2.47525	2.70025	SAR1B
Increased purine levels (HP:0004368)	0.335913	0.607807	2.47525	2.70025	PPARG
Abnormality of skeletal muscle fiber size (HP:0012084)	0.335913	0.607807	2.47525	2.70025	STIM1
Myoglobinuria (HP:0002913)	0.335913	0.607807	2.47525	2.70025	ISCU
Long philtrum (HP:0000343)	0.338989	0.608173	1.30276	1.40931	MOCS2;NRAS;PIGN;WDR34;GNE
Blue sclerae (HP:0000592)	0.342754	0.608173	1.65017	1.7669	MVK;SERPINH1
Epistaxis (HP:0000421)	0.342754	0.608173	1.65017	1.7669	STIM1;MYD88
Ptosis (HP:0000508)	0.350167	0.608173	1.17171	1.22953	MGME1;ZEB2;NRAS;PEX11B;LMNA;SLC17A5;VAMP1;HS6ST1;DUSP6;NME1
Low posterior hairline (HP:0002162)	0.351966	0.608173	1.61649	1.68797	NRAS;GNE
Round face (HP:0000311)	0.351966	0.608173	1.61649	1.68797	NRAS;LMNA
Gastrointestinal atresia (HP:0002589)	0.352695	0.608173	2.32964	2.42784	NEK1
Abnormality of the peritoneum (HP:0002585)	0.352695	0.608173	2.32964	2.42784	MVK
Opisthotonus (HP:0002179)	0.352695	0.608173	2.32964	2.42784	MOCS2
Increased serum ferritin (HP:0003281)	0.352695	0.608173	2.32964	2.42784	HFE
Hemangiomatosis (HP:0007461)	0.352695	0.608173	2.32964	2.42784	TSC1
Episodic fever (HP:0001954)	0.352695	0.608173	2.32964	2.42784	STIM1
High pitched voice (HP:0001620)	0.352695	0.608173	2.32964	2.42784	SERPINH1
Personality changes (HP:0000751)	0.352695	0.608173	2.32964	2.42784	EIF2B3
Atelectasis (HP:0100750)	0.352695	0.608173	2.32964	2.42784	TSC1
Meningioma (HP:0002858)	0.352695	0.608173	2.32964	2.42784	NRAS
Abnormality of the common coagulation pathway (HP:0010990)	0.352695	0.608173	2.32964	2.42784	LMAN1
Abnormality of the heme biosynthetic pathway (HP:0010472)	0.352695	0.608173	2.32964	2.42784	UROS
Rhabdomyolysis (HP:0003201)	0.352695	0.608173	2.32964	2.42784	ISCU
Cone-shaped epiphyses of the phalanges of the hand (HP:0010230)	0.352695	0.608173	2.32964	2.42784	DYM
Generalized hypopigmentation of hair (HP:0011358)	0.352695	0.608173	2.32964	2.42784	SLC17A5
Premature ovarian failure (HP:0008209)	0.352695	0.608173	2.32964	2.42784	EIF2B3
Hypohidrosis (HP:0000966)	0.361132	0.611552	1.58416	1.61348	STS;MVK
Aplasia/Hypoplasia of the scapulae (HP:0006713)	0.369053	0.611552	2.20022	2.19321	DYM
Hypoplastic scapulae (HP:0000882)	0.369053	0.611552	2.20022	2.19321	DYM
Thin ribs (HP:0000883)	0.369053	0.611552	2.20022	2.19321	SERPINH1
Renal tubular acidosis (HP:0001947)	0.369053	0.611552	2.20022	2.19321	FN1
Abnormality of the thoracic spine (HP:0100711)	0.369053	0.611552	2.20022	2.19321	DYM
Esophageal varix (HP:0002040)	0.369053	0.611552	2.20022	2.19321	EOGT
Soft skin (HP:0000977)	0.369053	0.611552	2.20022	2.19321	MTAP
Exotropia (HP:0000577)	0.369053	0.611552	2.20022	2.19321	SLC17A5
Skull defect (HP:0001362)	0.369053	0.611552	2.20022	2.19321	EOGT
Delusions (HP:0000746)	0.369053	0.611552	2.20022	2.19321	EIF2B3
Hypoplastic iliac wings (HP:0002866)	0.369053	0.611552	2.20022	2.19321	DYM
Thyroid carcinoma (HP:0002890)	0.369053	0.611552	2.20022	2.19321	NRAS
Woolly hair (HP:0002224)	0.369053	0.611552	2.20022	2.19321	SNRPE
Prolonged QT interval (HP:0001657)	0.369053	0.611552	2.20022	2.19321	AKAP9
Congenital ichthyosiform erythroderma (HP:0007431)	0.369053	0.611552	2.20022	2.19321	STS
Hypoventilation (HP:0002791)	0.369053	0.611552	2.20022	2.19321	DMD
Epileptic encephalopathy (HP:0200134)	0.369053	0.611552	2.20022	2.19321	CHD2
Short femoral neck (HP:0100864)	0.369053	0.611552	2.20022	2.19321	IFT140
Delayed eruption of teeth (HP:0000684)	0.370299	0.612359	1.38153	1.37248	ZEB2;LMNA;ZMPSTE24
Gynecomastia (HP:0000771)	0.379316	0.617682	1.52323	1.4766	HS6ST1;DUSP6
Juvenile onset (HP:0003621)	0.384047	0.617682	1.35014	1.29207	EIF2B3;LMNA;ISCU
Anophthalmia (HP:0000528)	0.384999	0.617682	2.08442	1.98961	BMP4
Progressive hearing impairment (HP:0001730)	0.384999	0.617682	2.08442	1.98961	PEX11B
Supernumerary nipples (HP:0002558)	0.384999	0.617682	2.08442	1.98961	ZEB2
Muscle abnormality related to mitochondrial dysfunction (HP:0003800)	0.384999	0.617682	2.08442	1.98961	ISCU
Spinal canal stenosis (HP:0003416)	0.384999	0.617682	2.08442	1.98961	DYM
Inability to walk (HP:0002540)	0.384999	0.617682	2.08442	1.98961	SLC17A5
Neoplasm of the rectum (HP:0100743)	0.384999	0.617682	2.08442	1.98961	MSH6
Basal cell carcinoma (HP:0002671)	0.384999	0.617682	2.08442	1.98961	MSH6
Brittle hair (HP:0002299)	0.384999	0.617682	2.08442	1.98961	ZMPSTE24
Bowel diverticulosis (HP:0005222)	0.384999	0.617682	2.08442	1.98961	PKD1
Hypopigmentation of the fundus (HP:0007894)	0.384999	0.617682	2.08442	1.98961	TSC1
Abnormal atrioventricular conduction (HP:0005150)	0.384999	0.617682	2.08442	1.98961	LMNA
Abnormality of chromosome segregation (HP:0002916)	0.384999	0.617682	2.08442	1.98961	TSC1
Abdominal pain (HP:0002027)	0.388257	0.620553	1.26733	1.199	MSH6;MVK;TSC1;NME1
Narrow face (HP:0000275)	0.388326	0.620553	1.49449	1.41365	LMNA;ZMPSTE24
Gingival bleeding (HP:0000225)	0.400543	0.624011	1.9802	1.81175	MYD88
Cystic liver disease (HP:0006706)	0.400543	0.624011	1.9802	1.81175	PKD1
Aplasia/Hypoplasia involving the femoral head and neck (HP:0009108)	0.400543	0.624011	1.9802	1.81175	IFT140
Abnormality of the musculature of the hand (HP:0001421)	0.400543	0.624011	1.9802	1.81175	STIM1
Increased number of teeth (HP:0011069)	0.400543	0.624011	1.9802	1.81175	AMMECR1
Hepatocellular carcinoma (HP:0001402)	0.400543	0.624011	1.9802	1.81175	HFE
Renal dysplasia (HP:0000110)	0.400543	0.624011	1.9802	1.81175	IFT140
Abnormality of dental color (HP:0011073)	0.400543	0.624011	1.9802	1.81175	UROS
Proximal amyotrophy (HP:0007126)	0.400543	0.624011	1.9802	1.81175	MGME1
Absent hair (HP:0002298)	0.400543	0.624011	1.9802	1.81175	SNRPE
Uterine leiomyosarcoma (HP:0002891)	0.400543	0.624011	1.9802	1.81175	NRAS
Leiomyosarcoma (HP:0100243)	0.400543	0.624011	1.9802	1.81175	NRAS
Deep philtrum (HP:0002002)	0.400543	0.624011	1.9802	1.81175	NRAS
Delayed skeletal maturation (HP:0002750)	0.404126	0.628381	1.20012	1.08734	BMP4;NRAS;MVK;HS6ST1;DUSP6
Coarse facial features (HP:0000280)	0.41109	0.632953	1.22803	1.09165	PIGN;SLC17A5;DYM;GNE
Pes cavus (HP:0001761)	0.41109	0.632953	1.22803	1.09165	LMNA;VAMP1;HS6ST1;DUSP6
Optic disc pallor (HP:0000543)	0.414996	0.632953	1.41443	1.24397	MVK;ARL2BP
Hydronephrosis (HP:0000126)	0.414996	0.632953	1.41443	1.24397	ARNT2;PIGN
Primary adrenal insufficiency (HP:0008207)	0.414996	0.632953	1.41443	1.24397	BMP4;PEX11B
Nasal speech (HP:0001611)	0.415694	0.632953	1.8859	1.65546	MGME1
Fat malabsorption (HP:0002630)	0.415694	0.632953	1.8859	1.65546	SAR1B
Neoplasm of the small intestine (HP:0100833)	0.415694	0.632953	1.8859	1.65546	MSH6
Abnormality of iron homeostasis (HP:0011031)	0.415694	0.632953	1.8859	1.65546	HFE
Porencephaly (HP:0002132)	0.415694	0.632953	1.8859	1.65546	EOGT
Cystic hygroma (HP:0000476)	0.415694	0.632953	1.8859	1.65546	NRAS
Hypopigmented skin patches (HP:0001053)	0.418082	0.634195	1.27755	1.11412	NRAS;HFE;TSC1
Narrow mouth (HP:0000160)	0.418082	0.634195	1.27755	1.11412	LMNA;CRKL;ZMPSTE24
Autosomal dominant inheritance (HP:0000006)	0.422537	0.637401	1.04772	0.902591	MVK;ATL3;DBI;CHD2;HS6ST1;PKD1;NRAS;SART3;LMNA;EGLN1;DTNA;FN1;ASNS;SMAD9;CSNK1D;TSC1;ETV1;NME1;MSH6;BMP4;MTAP;ZEB2;STIM1;KCNMA1;VAMP1;PPARG;SNRPE;SQSTM1;MYD88;GNE
Exercise intolerance (HP:0003546)	0.423757	0.637401	1.38961	1.19311	MGME1;ISCU
Hypodontia (HP:0000668)	0.423757	0.637401	1.38961	1.19311	BBS10;BBS7
Intellectual disability, moderate (HP:0002342)	0.430463	0.637401	1.80018	1.51736	ZEB2
Gingivitis (HP:0000230)	0.430463	0.637401	1.80018	1.51736	TSC1
Paraparesis (HP:0002385)	0.430463	0.637401	1.80018	1.51736	SQSTM1
Proximal placement of thumb (HP:0009623)	0.430463	0.637401	1.80018	1.51736	BMP4
Transitional cell carcinoma of the bladder (HP:0006740)	0.430463	0.637401	1.80018	1.51736	NRAS
Large hands (HP:0001176)	0.430463	0.637401	1.80018	1.51736	ASNS
Intention tremor (HP:0002080)	0.430463	0.637401	1.80018	1.51736	SCP2
Torticollis (HP:0000473)	0.430463	0.637401	1.80018	1.51736	SCP2
Sparse scalp hair (HP:0002209)	0.430463	0.637401	1.80018	1.51736	LMNA
2-3 toe syndactyly (HP:0004691)	0.430463	0.637401	1.80018	1.51736	GNE
Incomplete penetrance (HP:0003829)	0.441072	0.637659	1.34251	1.09891	SMAD9;NME1
Intellectual disability, severe (HP:0010864)	0.441072	0.637659	1.34251	1.09891	CEP135;LARP7
Aganglionic megacolon (HP:0002251)	0.444859	0.637659	1.22486	0.992139	ZEB2;BBS10;BBS7
Preaxial foot polydactyly (HP:0001841)	0.44486	0.637659	1.72191	1.39474	NEK1
Neonatal onset (HP:0003623)	0.44486	0.637659	1.72191	1.39474	ARHGDIA
Steppage gait (HP:0003376)	0.44486	0.637659	1.72191	1.39474	LMNA
Abnormality of the epiphyses of the phalanges of the hand (HP:0005920)	0.44486	0.637659	1.72191	1.39474	DYM
Nephronophthisis (HP:0000090)	0.44486	0.637659	1.72191	1.39474	IFT140
Generalized hypopigmentation (HP:0007513)	0.44486	0.637659	1.72191	1.39474	HPS5
Joint stiffness (HP:0001387)	0.44486	0.637659	1.72191	1.39474	LMNA
Cholelithiasis (HP:0001081)	0.44486	0.637659	1.72191	1.39474	UROS
Cleft eyelid (HP:0000625)	0.44486	0.637659	1.72191	1.39474	POLR1C
Focal seizures (HP:0007359)	0.44486	0.637659	1.72191	1.39474	TSC1
Scapular winging (HP:0003691)	0.44486	0.637659	1.72191	1.39474	LMNA
Status epilepticus (HP:0002133)	0.44486	0.637659	1.72191	1.39474	CHD2
Premature graying of hair (HP:0002216)	0.44486	0.637659	1.72191	1.39474	MTAP
Ocular albinism (HP:0001107)	0.44486	0.637659	1.72191	1.39474	HPS5
Death in childhood (HP:0003819)	0.44486	0.637659	1.72191	1.39474	SLC17A5
Slow progression (HP:0003677)	0.451478	0.639597	1.21237	0.964108	STIM1;LMNA;FN1
Opacification of the corneal stroma (HP:0007759)	0.456147	0.639597	1.15632	0.907642	STS;PEX11B;HDAC9;LDLR
Anonychia (HP:0001798)	0.458096	0.639597	1.29849	1.0137	EOGT;CRKL
Bladder neoplasm (HP:0009725)	0.458893	0.639597	1.65017	1.28538	NRAS
Deviation of the thumb (HP:0009603)	0.458893	0.639597	1.65017	1.28538	BMP4
Optic nerve hypoplasia (HP:0000609)	0.458893	0.639597	1.65017	1.28538	DDHD2
External ophthalmoplegia (HP:0000544)	0.458893	0.639597	1.65017	1.28538	MGME1
Cupped ear (HP:0000378)	0.458893	0.639597	1.65017	1.28538	ZEB2
Chest pain (HP:0100749)	0.458893	0.639597	1.65017	1.28538	TSC1
Bladder carcinoma (HP:0002862)	0.458893	0.639597	1.65017	1.28538	NRAS
Neck muscle weakness (HP:0000467)	0.458893	0.639597	1.65017	1.28538	LMNA
Unsteady gait (HP:0002317)	0.458893	0.639597	1.65017	1.28538	EIF2B3
Abnormality of transition element cation homeostasis (HP:0011030)	0.458893	0.639597	1.65017	1.28538	HFE
Drooling (HP:0002307)	0.458893	0.639597	1.65017	1.28538	ZEB2
Short middle phalanx of finger (HP:0005819)	0.458893	0.639597	1.65017	1.28538	BMP4
Abnormal autonomic nervous system physiology (HP:0012332)	0.458893	0.639597	1.65017	1.28538	NME1
Infantile onset (HP:0003593)	0.461042	0.641485	1.09145	0.845071	PDP1;AUH;SAR1B;IFT140;RDX;TSC1;DDOST
Prominent nasal bridge (HP:0000426)	0.464618	0.645347	1.18812	0.91074	BBS10;BBS7;CRKL
Aplasia/hypoplasia of the femur (HP:0005613)	0.472573	0.651908	1.58416	1.18743	IFT140
Onion bulb formation (HP:0003383)	0.472573	0.651908	1.58416	1.18743	LMNA
Excessive salivation (HP:0003781)	0.472573	0.651908	1.58416	1.18743	ZEB2
Abnormality of sodium homeostasis (HP:0010931)	0.472573	0.651908	1.58416	1.18743	ARNT2
Short foot (HP:0001773)	0.474816	0.653885	1.25727	0.936448	BBS10;BBS7
Brachycephaly (HP:0000248)	0.483058	0.659468	1.23762	0.900517	BMP4;NEK1
Congenital onset (HP:0003577)	0.483723	0.659468	1.1156	0.810201	CEP135;PIGN;UROS;KPTN
Abnormality of the epiphyses of the hand (HP:0005924)	0.485907	0.659468	1.52323	1.09937	DYM
Iris hypopigmentation (HP:0007730)	0.485907	0.659468	1.52323	1.09937	HPS5
Abnormal gallbladder morphology (HP:0012437)	0.485907	0.659468	1.52323	1.09937	UROS
Abnormality of the labia (HP:0000058)	0.485907	0.659468	1.52323	1.09937	LMNA
Abnormal biliary tract morphology (HP:0012440)	0.485907	0.659468	1.52323	1.09937	MSH6
Portal hypertension (HP:0001409)	0.485907	0.659468	1.52323	1.09937	EOGT
Blepharophimosis (HP:0000581)	0.49047	0.659468	1.14242	0.813852	LMNA;CRKL;ZMPSTE24
Narrow forehead (HP:0000341)	0.49122	0.659468	1.21858	0.866246	PIGN;SERPINH1
Macrotia (HP:0000400)	0.496837	0.659468	1.13154	0.791505	BMP4;PIGN;ASNS
Abnormality involving the epiphyses of the upper limbs (HP:0003839)	0.498904	0.659468	1.46681	1.01994	DYM
Craniofacial dystonia (HP:0012179)	0.498904	0.659468	1.46681	1.01994	SCP2
Abnormal neuron morphology (HP:0012757)	0.498904	0.659468	1.46681	1.01994	SCP2
Abnormality of the motor neurons (HP:0002450)	0.498904	0.659468	1.46681	1.01994	SCP2
Chondrocalcinosis (HP:0000934)	0.498904	0.659468	1.46681	1.01994	ZMPSTE24
Foot dorsiflexor weakness (HP:0009027)	0.498904	0.659468	1.46681	1.01994	LMNA
Generalized myoclonic seizures (HP:0002123)	0.498904	0.659468	1.46681	1.01994	CHD2
Epiphyseal stippling (HP:0010655)	0.498904	0.659468	1.46681	1.01994	PEX11B
Widely spaced teeth (HP:0000687)	0.498904	0.659468	1.46681	1.01994	ZEB2
Severe global developmental delay (HP:0011344)	0.498904	0.659468	1.46681	1.01994	GLUL
Nephropathy (HP:0000112)	0.4993	0.659468	1.20012	0.833541	IFT140;WDR34
Astigmatism (HP:0000483)	0.4993	0.659468	1.20012	0.833541	BBS10;BBS7
Cheekbone underdevelopment (HP:0010669)	0.4993	0.659468	1.20012	0.833541	POLR1C;CRKL
Nephrolithiasis (HP:0000787)	0.4993	0.659468	1.20012	0.833541	MOCS2;SERPINH1
Cafe-au-lait spot (HP:0000957)	0.507297	0.66167	1.18221	0.802315	MSH6;TSC1
Myoclonus (HP:0001336)	0.507297	0.66167	1.18221	0.802315	MOCS2;NME1
Generalized hyperpigmentation (HP:0007440)	0.511574	0.66167	1.41443	0.948038	HFE
Aplasia/Hypoplasia of the optic nerve (HP:0008058)	0.511574	0.66167	1.41443	0.948038	DDHD2
Abnormality of the hepatic vasculature (HP:0006707)	0.511574	0.66167	1.41443	0.948038	EOGT
Overfolded helix (HP:0000396)	0.511574	0.66167	1.41443	0.948038	PIGN
Gowers sign (HP:0003391)	0.511574	0.66167	1.41443	0.948038	DMD
Joint swelling (HP:0001386)	0.511574	0.66167	1.41443	0.948038	PTPN2
Growth hormone deficiency (HP:0000824)	0.511574	0.66167	1.41443	0.948038	ARNT2
Sclerocornea (HP:0000647)	0.511574	0.66167	1.41443	0.948038	BMP4
Abnormality of Sharpey fibers (HP:0100685)	0.511574	0.66167	1.41443	0.948038	ZMPSTE24
Abnormality of the carotid arteries (HP:0005344)	0.511574	0.66167	1.41443	0.948038	PPARG
Facial asymmetry (HP:0000324)	0.515211	0.66167	1.16482	0.772486	BMP4;CRKL
Vesicoureteral reflux (HP:0000076)	0.515211	0.66167	1.16482	0.772486	ARNT2;PIGN
Vomiting (HP:0002013)	0.515695	0.66167	1.10011	0.728536	ZEB2;MVK;SAR1B
Radial deviation of finger (HP:0009466)	0.521136	0.66167	1.03766	0.676288	BMP4;NRAS;BBS10;BBS7;KPTN;CRKL
Autism (HP:0000717)	0.521897	0.66167	1.09002	0.708822	STS;DYM;TSC1
Papilloma (HP:0012740)	0.523924	0.66167	1.36565	0.88277	TCF3
Generalized tonic-clonic seizures (HP:0002069)	0.523924	0.66167	1.36565	0.88277	KCNMA1
Rhizomelia (HP:0008905)	0.523924	0.66167	1.36565	0.88277	DYM
Bifid uvula (HP:0000193)	0.523924	0.66167	1.36565	0.88277	BMP4
Wormian bones (HP:0002645)	0.523924	0.66167	1.36565	0.88277	LMNA
Verrucae (HP:0200043)	0.523924	0.66167	1.36565	0.88277	TCF3
Aplasia/Hypoplasia of the thymus (HP:0010515)	0.523924	0.66167	1.36565	0.88277	POLR1C
Respiratory distress (HP:0002098)	0.523924	0.66167	1.36565	0.88277	ITGA3
Focal dystonia (HP:0004373)	0.523924	0.66167	1.36565	0.88277	SCP2
Abnormality of the foot musculature (HP:0001436)	0.523924	0.66167	1.36565	0.88277	LMNA
Hemoptysis (HP:0002105)	0.523924	0.66167	1.36565	0.88277	TSC1
Impaired vibratory sensation (HP:0002495)	0.535963	0.667472	1.32013	0.823354	SAR1B
Decreased motor nerve conduction velocity (HP:0003431)	0.535963	0.667472	1.32013	0.823354	LMNA
Abnormally folded helix (HP:0008544)	0.535963	0.667472	1.32013	0.823354	PIGN
Ulnar deviation of finger (HP:0009465)	0.535963	0.667472	1.32013	0.823354	CRKL
Posterior embryotoxon (HP:0000627)	0.535963	0.667472	1.32013	0.823354	PEX11B
Peripheral demyelination (HP:0011096)	0.535963	0.667472	1.32013	0.823354	MOCS2
Emphysema (HP:0002097)	0.535963	0.667472	1.32013	0.823354	TSC1
Plagiocephaly (HP:0001357)	0.535963	0.667472	1.32013	0.823354	BMP4
Hypogonadotrophic hypogonadism (HP:0000044)	0.535963	0.667472	1.32013	0.823354	HFE
Epicanthus (HP:0000286)	0.538072	0.668652	1.01984	0.632061	PIGN;PEX11B;SLC17A5;TCF3;WDR34;GNE
Elevated hepatic transaminases (HP:0002910)	0.540238	0.668652	1.06082	0.653195	MVK;HFE;DOLK
Ectopic anus (HP:0004397)	0.547697	0.668652	1.27755	0.769125	WDR34
Decreased number of peripheral myelinated nerve fibers (HP:0003380)	0.547697	0.668652	1.27755	0.769125	LMNA
Elevated alkaline phosphatase (HP:0003155)	0.547697	0.668652	1.27755	0.769125	SQSTM1
Hypoplastic ilia (HP:0000946)	0.547697	0.668652	1.27755	0.769125	DYM
Abnormality of the renal medulla (HP:0100957)	0.547697	0.668652	1.27755	0.769125	IFT140
Genu varum (HP:0002970)	0.547697	0.668652	1.27755	0.769125	DYM
Abnormal EKG (HP:0003115)	0.547697	0.668652	1.27755	0.769125	AKAP9
Melanoma (HP:0002861)	0.547697	0.668652	1.27755	0.769125	NRAS
Renal tubular dysfunction (HP:0000124)	0.547697	0.668652	1.27755	0.769125	FN1
Freckling (HP:0001480)	0.547697	0.668652	1.27755	0.769125	MSH6
Abnormality of the line of Schwalbe (HP:0008048)	0.547697	0.668652	1.27755	0.769125	PEX11B
Low-set, posteriorly rotated ears (HP:0000368)	0.54851	0.668652	1.00445	0.603221	NRAS;BBS10;MVK;PEX11B;LMNA;BBS7;ZMPSTE24
Renal hypoplasia (HP:0000089)	0.559135	0.673466	1.23762	0.719509	BMP4
Amaurosis fugax (HP:0100576)	0.559135	0.673466	1.23762	0.719509	MSH6
Lower limb muscle weakness (HP:0007340)	0.559135	0.673466	1.23762	0.719509	DDHD2
Esotropia (HP:0000565)	0.559135	0.673466	1.23762	0.719509	ZEB2
Hallux valgus (HP:0001822)	0.559135	0.673466	1.23762	0.719509	ATL3
Type I diabetes mellitus (HP:0100651)	0.559135	0.673466	1.23762	0.719509	LMNA
Rapidly progressive (HP:0003678)	0.559135	0.673466	1.23762	0.719509	ARHGDIA
Aplasia/Hypoplasia involving the pelvis (HP:0009103)	0.559135	0.673466	1.23762	0.719509	IFT140
Dysphagia (HP:0002015)	0.569886	0.682819	1.01549	0.571027	PDP1;DDHD2;VAMP1
Abnormality of the acetabulum (HP:0003170)	0.570285	0.682819	1.20012	0.67401	DYM
Abnormality of the wing of the ilium (HP:0011867)	0.570285	0.682819	1.20012	0.67401	DYM
Stroke (HP:0001297)	0.570285	0.682819	1.20012	0.67401	STIM1
Fasciculations (HP:0002380)	0.581153	0.685659	1.16482	0.632197	TSPYL1
Preauricular skin tag (HP:0000384)	0.581153	0.685659	1.16482	0.632197	POLR1C
Abnormality of alkaline phosphatase activity (HP:0004379)	0.581153	0.685659	1.16482	0.632197	SQSTM1
Leukocytosis (HP:0001974)	0.581153	0.685659	1.16482	0.632197	MVK
Elbow flexion contracture (HP:0002987)	0.581153	0.685659	1.16482	0.632197	LMNA
Hyperammonemia (HP:0001987)	0.581153	0.685659	1.16482	0.632197	GLUL
Deviation of the hallux (HP:0010051)	0.581153	0.685659	1.16482	0.632197	ATL3
Neoplasm of the lung (HP:0100526)	0.581153	0.685659	1.16482	0.632197	EGFR
Neoplasm of the colon (HP:0100273)	0.581153	0.685659	1.16482	0.632197	MSH6
Difficulty walking (HP:0002355)	0.581153	0.685659	1.16482	0.632197	LMNA
Blindness (HP:0000618)	0.582552	0.686306	1.02867	0.55583	BMP4;EIF2B3
Hypothyroidism (HP:0000821)	0.587099	0.688257	0.990099	0.52729	BMP4;ARNT2;TSC1
Hypertelorism (HP:0000316)	0.589278	0.688257	0.96595	0.51085	MOCS2;ZEB2;NRAS;LMNA;POLR1C;TCF3;GNE;ZMPSTE24
Protruding ear (HP:0000411)	0.591747	0.688257	1.13154	0.593693	BMP4
Abnormal enzyme/coenzyme activity (HP:0012379)	0.591747	0.688257	1.13154	0.593693	SQSTM1
Intestinal polyposis (HP:0200008)	0.591747	0.688257	1.13154	0.593693	MSH6
Periorbital edema (HP:0100539)	0.591747	0.688257	1.13154	0.593693	MYD88
Smooth philtrum (HP:0000319)	0.591747	0.688257	1.13154	0.593693	GNE
Coarse hair (HP:0002208)	0.591747	0.688257	1.13154	0.593693	NRAS
Cerebral cortical atrophy (HP:0002120)	0.592373	0.688257	0.971876	0.508892	BMP4;MVK;DOLK;SLC2A3
Camptodactyly of finger (HP:0100490)	0.592737	0.688257	0.981916	0.513546	LMNA;CRKL;ZMPSTE24
Bruising susceptibility (HP:0000978)	0.59655	0.689182	1.00263	0.517953	MTAP;HPS5
Dysarthria (HP:0001260)	0.597743	0.689182	0.961261	0.494659	EIF2B3;AUH;SLC17A5;DDHD2;VAMP1
Obsessive-compulsive behavior (HP:0000722)	0.602074	0.689182	1.10011	0.558169	CRKL
Hyperbilirubinemia (HP:0002904)	0.602074	0.689182	1.10011	0.558169	SLC17A5
Broad phalanx (HP:0006009)	0.602074	0.689182	1.10011	0.558169	RAB33B
Abnormality of the shoulder girdle musculature (HP:0001435)	0.602074	0.689182	1.10011	0.558169	LMNA
Abnormality of the thymus (HP:0000777)	0.602074	0.689182	1.10011	0.558169	POLR1C
Facial edema (HP:0000282)	0.602074	0.689182	1.10011	0.558169	MYD88
Low anterior hairline (HP:0000294)	0.602074	0.689182	1.10011	0.558169	POLR1C
Abnormality of the gallbladder (HP:0005264)	0.602074	0.689182	1.10011	0.558169	UROS
Pulmonary hypertension (HP:0002092)	0.603415	0.689739	0.990099	0.500148	EOGT;SMAD9
Recurrent urinary tract infections (HP:0000010)	0.610192	0.691872	0.977876	0.483052	MSH6;CRKL
Hypotelorism (HP:0000601)	0.612139	0.691872	1.07038	0.525336	STIM1
Female pseudohermaphroditism (HP:0010458)	0.612139	0.691872	1.07038	0.525336	PEX11B
Intestinal polyp (HP:0005266)	0.612139	0.691872	1.07038	0.525336	MSH6
Nephrocalcinosis (HP:0000121)	0.612139	0.691872	1.07038	0.525336	WDR34
Abnormality of the humerus (HP:0003063)	0.612139	0.691872	1.07038	0.525336	DYM
Lumbar hyperlordosis (HP:0002938)	0.612139	0.691872	1.07038	0.525336	DYM
Anxiety (HP:0000739)	0.612139	0.691872	1.07038	0.525336	KPTN
Inguinal hernia (HP:0000023)	0.616881	0.696256	0.96595	0.466631	SERPINH1;GNE
Pachygyria (HP:0001302)	0.621951	0.699084	1.04221	0.494939	NEK1
Abnormality of the upper arm (HP:0001454)	0.621951	0.699084	1.04221	0.494939	DYM
Constipation (HP:0002019)	0.625462	0.699084	0.931858	0.437288	MSH6;ZEB2;DDHD2;DDOST
Frontal bossing (HP:0002007)	0.627217	0.699084	0.92967	0.433657	MOCS2;POLR1C;WDR34;KPTN;GNE
Aplasia/Hypoplasia affecting the fundus (HP:0008057)	0.631515	0.699084	1.01549	0.466752	DDHD2
Anal atresia (HP:0002023)	0.631515	0.699084	1.01549	0.466752	PIGN
Broad long bones (HP:0005622)	0.631515	0.699084	1.01549	0.466752	RAB33B
Abnormality of salivation (HP:0100755)	0.631515	0.699084	1.01549	0.466752	ZEB2
Ulnar deviation of the hand or of fingers of the hand (HP:0001193)	0.631515	0.699084	1.01549	0.466752	CRKL
Skin tags (HP:0010609)	0.631515	0.699084	1.01549	0.466752	POLR1C
CNS demyelination (HP:0007305)	0.631515	0.699084	1.01549	0.466752	EIF2B3
Choreoathetosis (HP:0001266)	0.631515	0.699084	1.01549	0.466752	PIGN
Melanocytic nevus (HP:0000995)	0.631515	0.699084	1.01549	0.466752	NRAS
Sandal gap (HP:0001852)	0.631515	0.699084	1.01549	0.466752	CRKL
Restrictive lung disease (HP:0002091)	0.640837	0.708432	0.990099	0.440574	TSC1
Wide mouth (HP:0000154)	0.642753	0.709391	0.921022	0.407088	POLR1C;LARP7
Wide nasal bridge (HP:0000431)	0.643463	0.709391	0.912534	0.402328	ZEB2;ARL2BP;POLR1C;GLUL;GNE
Single transverse palmar crease (HP:0000954)	0.649001	0.71359	0.910436	0.3936	BMP4;PEX11B
Anorexia (HP:0002039)	0.649924	0.71359	0.96595	0.416228	MYD88
Childhood onset (HP:0011463)	0.649924	0.71359	0.96595	0.416228	DMD
Tapered finger (HP:0001182)	0.658782	0.721352	0.942951	0.393553	AMMECR1
Prominent occiput (HP:0000269)	0.658782	0.721352	0.942951	0.393553	TSC1
Abnormality of the fingernails (HP:0001231)	0.666316	0.725882	0.880088	0.357308	BMP4;LMNA;ZMPSTE24
Emotional lability (HP:0000712)	0.667416	0.725882	0.921022	0.372408	EIF2B3
Multiple lipomas (HP:0001012)	0.667416	0.725882	0.921022	0.372408	LMNA
Congenital cataract (HP:0000519)	0.667416	0.725882	0.921022	0.372408	PEX11B
Pallor (HP:0000980)	0.667416	0.725882	0.921022	0.372408	MYD88
Underdeveloped supraorbital ridges (HP:0009891)	0.675831	0.734046	0.90009	0.352666	PEX11B
Short neck (HP:0000470)	0.678075	0.735493	0.870417	0.338154	BBS10;DYM;BBS7;RAB33B
Nail dystrophy (HP:0008404)	0.684035	0.739968	0.880088	0.334211	ITGA3
Neoplasm of the pancreas (HP:0002894)	0.684035	0.739968	0.880088	0.334211	MSH6
Depressed nasal bridge (HP:0005280)	0.685803	0.740888	0.868508	0.32757	PIGN;PEX11B;AMMECR1;WDR34;GLUL
Radioulnar synostosis (HP:0002974)	0.692031	0.744625	0.860956	0.316939	NRAS
Corneal dystrophy (HP:0001131)	0.692031	0.744625	0.860956	0.316939	HDAC9
Ovarian neoplasm (HP:0100615)	0.692031	0.744625	0.860956	0.316939	MSH6
Long face (HP:0000276)	0.695896	0.747788	0.833768	0.302286	MOCS2;CRKL
Oculomotor apraxia (HP:0000657)	0.699825	0.750012	0.842637	0.300759	CRKL
Webbed neck (HP:0000465)	0.699825	0.750012	0.842637	0.300759	NRAS
Thick lower lip vermilion (HP:0000179)	0.70678	0.754147	0.816577	0.283382	NRAS;AMMECR1
Microcornea (HP:0000482)	0.70678	0.754147	0.816577	0.283382	BMP4;HDAC9
Mandibular prognathia (HP:0000303)	0.70678	0.754147	0.816577	0.283382	DYM;KPTN
Respiratory insufficiency due to muscle weakness (HP:0002747)	0.707422	0.754147	0.825083	0.285584	LMNA
Dry skin (HP:0000958)	0.712098	0.758036	0.808244	0.274431	STS;DOLK
Hydrocephalus (HP:0000238)	0.714017	0.758036	0.829402	0.279382	NRAS;EOGT;SLC17A5;TSC1
Meningitis (HP:0001287)	0.714827	0.758036	0.808244	0.271339	TCF3
Synophrys (HP:0000664)	0.714827	0.758036	0.808244	0.271339	GNE
Clinodactyly of the 5th finger (HP:0004209)	0.717824	0.760215	0.825083	0.273541	BMP4;NRAS;KPTN;CRKL
Sepsis (HP:0100806)	0.722046	0.761687	0.792079	0.257954	TCF3
Downturned corners of mouth (HP:0002714)	0.722046	0.761687	0.792079	0.257954	BMP4
Chorioretinal coloboma (HP:0000567)	0.722046	0.761687	0.792079	0.257954	BMP4
Thin upper lip vermilion (HP:0000219)	0.729082	0.768105	0.776548	0.245366	GNE
Intestinal malrotation (HP:0002566)	0.742625	0.780336	0.747245	0.222354	NEK1
Muscular hypotonia of the trunk (HP:0008936)	0.742625	0.780336	0.747245	0.222354	ASNS
Pes planus (HP:0001763)	0.747102	0.78402	0.754361	0.219937	CRKL;RAB33B
Leukopenia (HP:0001882)	0.749141	0.785138	0.733407	0.211829	EOGT
Aplasia/Hypoplasia of the abdominal wall musculature (HP:0010318)	0.755492	0.790768	0.720072	0.201898	NRAS
Dehydration (HP:0001944)	0.761683	0.792111	0.707214	0.192521	TCF3
Pancreatitis (HP:0001733)	0.761683	0.792111	0.707214	0.192521	LMNA
Gait ataxia (HP:0002066)	0.761683	0.792111	0.707214	0.192521	PDP1
Arachnodactyly (HP:0001166)	0.761683	0.792111	0.707214	0.192521	CRKL
Gliosis (HP:0002171)	0.761683	0.792111	0.707214	0.192521	MOCS2
Lactic acidosis (HP:0003128)	0.769815	0.799538	0.720072	0.188374	PDP1;ISCU
Respiratory failure (HP:0002878)	0.773599	0.801964	0.682827	0.175283	DMD
X-linked recessive inheritance (HP:0001419)	0.774139	0.801964	0.713585	0.182681	STS;DMD
Metabolic acidosis (HP:0001942)	0.790367	0.817726	0.649245	0.15274	AUH
Distal sensory impairment (HP:0002936)	0.795677	0.822165	0.638774	0.145999	LMNA
Skin ulcer (HP:0200042)	0.802462	0.828117	0.671254	0.147723	TCF3;MYD88
Short philtrum (HP:0000322)	0.805896	0.830598	0.618812	0.13354	LARP7
Tracheoesophageal fistula (HP:0002575)	0.815606	0.839533	0.60006	0.122307	POLR1C
Palmoplantar keratoderma (HP:0000982)	0.817194	0.840096	0.649245	0.131069	DOLK;DMD
Joint laxity (HP:0001388)	0.820277	0.842193	0.591104	0.117105	SERPINH1
Gingival overgrowth (HP:0000212)	0.833594	0.854778	0.565771	0.102975	SLC17A5
Intrauterine growth retardation (HP:0001511)	0.840729	0.861	0.682827	0.118461	LMNA;PSPH;CRKL;ZMPSTE24
Dandy-Walker malformation (HP:0001305)	0.84192	0.861128	0.550055	0.0946478	NRAS
Highly arched eyebrow (HP:0002553)	0.845926	0.861948	0.54252	0.0907761	CRKL
Increased serum lactate (HP:0002151)	0.845926	0.861948	0.54252	0.0907761	ISCU
Paresthesia (HP:0003401)	0.845926	0.861948	0.54252	0.0907761	MSH6
Everted lower lip vermilion (HP:0000232)	0.849831	0.864834	0.535189	0.0870848	NRAS
Cerebral ischemia (HP:0002637)	0.857346	0.870369	0.521105	0.080205	MYD88
Pectus excavatum (HP:0000767)	0.858505	0.870369	0.586725	0.0895124	ZEB2;NRAS
Cerebellar atrophy (HP:0001272)	0.858505	0.870369	0.586725	0.0895124	MVK;PIGN
Broad forehead (HP:0000337)	0.860962	0.871765	0.514337	0.0769988	NRAS
Tetralogy of Fallot (HP:0001636)	0.871269	0.881096	0.49505	0.0682198	EOGT
Lethargy (HP:0001254)	0.874533	0.883289	0.488938	0.0655496	EIF2B3
Telecanthus (HP:0000506)	0.880814	0.888521	0.477156	0.0605552	DDHD2
Photophobia (HP:0000613)	0.88888	0.895539	0.538829	0.0634701	ARL2BP;ADAM9
Optic atrophy (HP:0000648)	0.913535	0.91923	0.635358	0.0574577	BMP4;EIF2B3;ARL2BP;AUH;PEX11B;TSC1
Upslanted palpebral fissure (HP:0000582)	0.937307	0.941976	0.366703	0.023742	PEX11B
Type II diabetes mellitus (HP:0005978)	0.943435	0.946955	0.353607	0.0205897	ARL2BP
Babinski sign (HP:0003487)	0.955126	0.957499	0.327305	0.0150274	DDHD2
Variable expressivity (HP:0003828)	0.975178	0.976388	0.275028	0.00691298	LMNA
Umbilical hernia (HP:0001537)	0.979274	0.979274	0.262278	0.00549316	EOGT
