# Supplementary material for: Evolutionary transcriptomics implicates HAND2 in the origins of implantation and regulation of gestation length
Source: eLife. 2021 Feb 1;10:e61257. doi: 10.7554/eLife.61257 (PMC7943190; doi:10.7554/eLife.61257)
Supplement: Figure 5—source data 1. [file elife-61257-fig5-data1.xlsx]

## Sheet: Figure 5—source data 1
Figure 5—source data 1. Raw and log transformed luminesence data for NK trans-well migration assays.
		Luminesence (RLU)
Media	Media+rhIL15	+NT siRNA	+ siHAND2	+NT siRNA	+ siIL15	+ IgG	+ abIL15
413	533	710	2019	876	745	812	657
409	539	800	2028	870	692	830	652
334	560	870	2091	911	633	768	776
350	532	770	1673	870	690	799	783
353	571	840	1846	844	683	758	686
362	518	780	2133	873	689	828	675
398	630	870	1930	838	674	803	731
339	513	860	1863	853	693	796	668
336	572	870	1895	875	692	813	749
355	641	880	2615	862	722	815	728
357	526	880	1797	871	752	768	767
378	621	870	1566	824	634	782	754
		Log(Luminesence (RLU))
Media	Media+rhIL15	+NT siRNA	+ siHAND2	+NT siRNA	+ siIL15	+ IgG	+ abIL15
6.02345	6.27852	6.56526	7.61036	6.77537	6.61338	6.6995	6.48768
6.01372	6.28972	6.68461	7.61481	6.76849	6.53959	6.72143	6.48004
5.81114	6.32794	6.76849	7.6454	6.81454	6.45047	6.64379	6.65415
5.85793	6.27664	6.64639	7.42237	6.76849	6.53669	6.68336	6.66313
5.86647	6.34739	6.7334	7.52078	6.73815	6.52649	6.63068	6.53088
5.89164	6.24998	6.65929	7.66528	6.77194	6.53524	6.71901	6.51471
5.98645	6.44572	6.76849	7.56528	6.73102	6.51323	6.68835	6.59441
5.826	6.24028	6.75693	7.52994	6.74876	6.54103	6.6796	6.50429
5.81711	6.34914	6.76849	7.54697	6.77422	6.53959	6.70073	6.61874
5.87212	6.46303	6.77992	7.86902	6.75926	6.58203	6.70319	6.5903
5.87774	6.2653	6.77992	7.49387	6.76964	6.62274	6.64379	6.64249
5.93489	6.43133	6.76849	7.35628	6.71417	6.45205	6.66185	6.62539
