# Supplementary material for: Evolutionary transcriptomics implicates HAND2 in the origins of implantation and regulation of gestation length
Source: eLife. 2021 Feb 1;10:e61257. doi: 10.7554/eLife.61257 (PMC7943190; doi:10.7554/eLife.61257)
Supplement: Figure 5—source data 2. [file elife-61257-fig5-data2.xlsx]

## Sheet: Figure 5—source data 2
Figure 5—source data 2. Raw and log transformed luminesence data for HTR-8 trans-well migration assays.
		Luminesence (RLU)
Media	Media+rhIL15	+NT siRNA	+ siHAND2	+NT siRNA	+ siIL15	+ IgG	+ abIL15
496	585	3603	2913	2555	1449	2776	1853
291	788	3010	5545	3207	1653	2906	2291
340	742	2750	5531	2757	1426	2908	1832
257	941	2828	4712	2955	1938	2558	1284
568	358	3493	5360	2934	1380	3182	2657
433	729	3279	4276	2871	1905	3169	1921
554	723	3692	5715	2476	1607	3303	2796
316	550	3523	5278	2385	1223	2534	2960
277	859	2912	5708	2521	1186	2914	2580
326	678	2790	5452	3131	1255	2784	1895
424	315	2942	6107	2570	1524	2803	2677
661	728	3435	4837	2340	1546	2783	2351
		Log(Luminesence (RLU))
Media	Media+rhIL15	+NT siRNA	+ siHAND2	+NT siRNA	+ siIL15	+ IgG	+ abIL15
6.20658	6.37161	8.18952	7.97694	7.84581	7.27863	7.92877	7.52456
5.67332	6.6695	8.0097	8.62065	8.07309	7.41035	7.97453	7.73674
5.82895	6.60935	7.91936	8.61812	7.9219	7.26263	7.97522	7.51316
5.54908	6.84694	7.94733	8.45787	7.99125	7.56941	7.84698	7.15774
6.34212	5.88053	8.15852	8.58672	7.98412	7.22984	8.06527	7.88495
6.07074	6.59167	8.09529	8.36077	7.96242	7.55224	8.06117	7.5606
6.31716	6.58341	8.21392	8.65085	7.8144	7.38212	8.10259	7.93595
5.75574	6.30992	8.16707	8.5713	7.77695	7.10906	7.83755	7.99294
5.62402	6.75577	7.9766	8.64962	7.83241	7.07834	7.97728	7.85554
5.7869	6.51915	7.9338	8.60374	8.04911	7.13489	7.93164	7.54697
6.04973	5.75257	7.98684	8.71719	7.85166	7.32909	7.93845	7.89245
6.49375	6.5903	8.14177	8.48405	7.75791	7.34343	7.93128	7.7626
