# Supplementary material for: La fe divina, la fe eclesiástica y la evolución del dogma
Source: eLife journal article supplement (doi:10.7554/elife.61257), 1960-01-01
Supplement: supp [file elife_poa_e61257_Figure_1_source_data_1.xlsx]

## Sheet: Figure 1—source data 1
Figure 1—source data 1. Species names (common and binomial), genome annotations used for RNA-Seq analysis and parity mode.
Species (common name)	Species (binomial name)	Genome annotation	Parity mode
Human	Homo sapiens	GRCh38.p13	Pregnant
Baboon	Papio anubis	Panu_3.0	Pregnant
Rhesus monkey	Macaca mulatta	Mmul_10	Pregnant
Rabbit	Oryctolagus cuniculus	OryCun2.0	Pregnant
Thirteen-lined ground squirrel	Ictidomys tridecemlineatus	SpeTri2.0	Pregnant
Seba's short-tailed bat	Carollia perspicillata	CarPer_v1_BIUU	Pregnant
Golden Hamster	Mesocricetus auratus	MesAur1.0	Pregnant
Mouse	Mus musculus	GRCm38.p6	Pregnant
Goat	Capra hircus	ARS1	Pregnant
Sheep	Ovis aries	Oar_rambouillet_v1.0	Pregnant
Dog	Canis lupus familiaris	CanFam3.1	Pregnant
Cow	Bos taurus	ARS-UCD1.2	Pregnant
Horse	Equus caballus	EquCab3.0	Pregnant
Pig	Sus scrofa	Sscrofa11.1	Pregnant
Armadillo	Dasypus novemcinctus	Dasnov3.0	Pregnant
Short-tailed opossum	Monodelphis domestica	MonDom5	Pregnant
Tamar wallaby	Notamacropus eugenii	Meug_1.1	Pregnant
Fat-tailed dunnart	Sminthopsis crassicaudata	de novo	Pregnant
Platypus	Ornithorhynchus anatinus	mOrnAna1.p.v1	Gravid
Southern grass skink	Pseudemoia entrecasteauxii	de novo	Gravid
Bougainville's skink	Lerista bougainvillii	de novo	Gravid
Common garden skink	Lampropholis guichenoti	de novo	Gravid
Ocellated skink	Chalcides ocellatus	de novo	Gravid
Three-toed skink	Saiphos equalis	de novo	Gravid
Chicken	Gallus gallus	GRCg6a	Gravid
Duck	Anas platyrhynchos	IASCAAS_PekingDuck_PBH1.5	Gravid
Frog	Xenopus tropicalis	Ensembl (64 v37) and JGI v3.0)	Gravid
