# Supplementary material for: Evolutionary transcriptomics implicates HAND2 in the origins of implantation and regulation of gestation length
Source: eLife. 2021 Feb 1;10:e61257. doi: 10.7554/eLife.61257 (PMC7943190; doi:10.7554/eLife.61257)
Supplement: Table 2—source data 1. [file elife-61257-table2-data1.xlsx]

## Sheet: GSE26787 - Fetile vs RSA
ID	adj.P.Val	P.Value	t	B	logFC	Gene.symbol	Gene.title
229941_at	7.08e-14	1.29e-18	279	30.7764	2.74353	FAM166B	family with sequence similarity 166, member B
206807_s_at	2.97e-13	1.47e-17	211	29.5659	2.2188	ADD2	adducin 2 (beta)
240270_x_at	2.97e-13	1.63e-17	-209	29.5057	-2.07	LOC283728	uncharacterized LOC283728
1562896_at	3.33e-13	2.6e-17	-198	29.2263	-2.04907	TNRC18	trinucleotide repeat containing 18
1566471_at	3.33e-13	3.05e-17	194	29.1283	1.92249	LOC100996506	all-trans-retinol 13,14-reductase-like
221889_at	3.35e-13	3.94e-17	189	28.9667	1.85985	KCTD13	potassium channel tetramerisation domain containing 13
208156_x_at	3.35e-13	4.74e-17	185	28.8479	2.32812	EPPK1	epiplakin 1
230196_x_at	3.35e-13	4.91e-17	184	28.8253	1.95497	ARHGAP23	Rho GTPase activating protein 23
226964_at	3.48e-13	5.73e-17	-181	28.7232	-2.02978
240854_x_at	4.31e-13	8.37e-17	173	28.4687	1.88893
236867_at	4.31e-13	8.92e-17	172	28.4253	2.13594
205050_s_at	4.31e-13	1.03e-16	-169	28.3227	-1.65256	MAPK8IP2	mitogen-activated protein kinase 8 interacting protein 2
239117_at	4.31e-13	1.04e-16	169	28.319	1.54135
224283_x_at	4.31e-13	1.13e-16	-168	28.2621	-1.57549	IL18BP	interleukin 18 binding protein
214674_at	4.31e-13	1.18e-16	167	28.2296	1.50927	USP19	ubiquitin specific peptidase 19
215741_x_at	4.53e-13	1.45e-16	163	28.0846	1.77049	AKAP8L	A kinase (PRKA) anchor protein 8-like
239235_at	4.53e-13	1.47e-16	-163	28.0752	-2.01993
221947_at	4.53e-13	1.51e-16	162	28.0556	1.98215	IL17RC	interleukin 17 receptor C
210884_s_at	4.53e-13	1.58e-16	161	28.0247	1.61831	SPAG11A	sperm associated antigen 11A
228219_s_at	5.1e-13	1.87e-16	-158	27.9023	-1.6812	UPB1	ureidopropionase, beta
216678_at	5.39e-13	2.14e-16	156	27.8019	2.24638	IFT122	intraflagellar transport 122 homolog (Chlamydomonas)
1564603_at	5.39e-13	2.17e-16	-155	27.7918	-1.49726	NUTM1	NUT midline carcinoma, family member 1
214471_x_at	5.41e-13	2.28e-16	-155	27.7558	-1.55039	LHB	luteinizing hormone beta polypeptide
243453_at	5.64e-13	2.48e-16	153	27.6932	1.39468
206080_at	5.67e-13	2.59e-16	152	27.6582	1.43759	PLCH2	phospholipase C, eta 2
244478_at	6.18e-13	3.05e-16	150	27.5356	1.7113	LRRC37A3	leucine rich repeat containing 37, member A3
216694_at	6.18e-13	3.1e-16	149	27.5248	1.68026	PQLC3	PQ loop repeat containing 3
215582_x_at	6.18e-13	3.16e-16	149	27.5082	1.65481	MCM3AP	minichromosome maintenance complex component 3 associated protein
231004_s_at	6.22e-13	3.3e-16	-148	27.476	-1.33042	H1FX	H1 histone family, member X
220163_s_at	6.51e-13	3.67e-16	146	27.3953	1.46661	HR	hair growth associated
1559870_at	6.51e-13	3.8e-16	146	27.3677	1.38825	LOC100129129	uncharacterized LOC100129129
229175_at	6.51e-13	3.81e-16	-146	27.366	-1.83319	SMYD4	SET and MYND domain containing 4
1553755_at	8.65e-13	5.25e-16	141	27.1155	1.38819	NXNL1	nucleoredoxin-like 1
216067_at	8.65e-13	5.38e-16	140	27.097	1.37466
216601_at	8.73e-13	5.71e-16	139	27.0491	1.73078	AOC4	amine oxidase, copper containing 3 (vascular adhesion protein 1) pseudogene
1557689_at	8.73e-13	5.75e-16	139	27.0445	1.35638
1555088_x_at	8.76e-13	5.93e-16	-139	27.0198	-1.4037	STAT5B	signal transducer and activator of transcription 5B
239607_at	9.18e-13	6.45e-16	137	26.9529	1.22331	GPR156	G protein-coupled receptor 156
210350_x_at	9.18e-13	6.68e-16	-137	26.925	-1.44456	ING1	inhibitor of growth family, member 1
238422_at	9.18e-13	6.72e-16	137	26.9202	1.2952	LBX2-AS1	LBX2 antisense RNA 1
229469_at	9.81e-13	7.39e-16	135	26.8437	1.6348	XAGE2B///XAGE2	X antigen family, member 2B///X antigen family, member 2
205723_at	9.81e-13	7.6e-16	135	26.8214	1.3542	CNTFR	ciliary neurotrophic factor receptor
1559502_s_at	9.81e-13	7.72e-16	135	26.8088	1.3142	LRRC25	leucine rich repeat containing 25
217207_s_at	1.03e-12	8.3e-16	133	26.75	1.41033	BTNL3	butyrophilin-like 3
231497_at	1.14e-12	9.42e-16	131	26.6472	1.67133	ZBTB20-AS1	ZBTB20 antisense RNA 1
224211_at	1.22e-12	1.03e-15	130	26.576	2.06108	FOXP3	forkhead box P3
236093_at	1.33e-12	1.16e-15	128	26.4742	1.3695
219879_s_at	1.33e-12	1.17e-15	128	26.4693	1.62778	C17orf53	chromosome 17 open reading frame 53
212963_at	1.41e-12	1.28e-15	127	26.3913	1.17289	TM2D1	TM2 domain containing 1
221835_at	1.41e-12	1.29e-15	127	26.3868	1.18454	DTX3	deltex homolog 3 (Drosophila)
241173_at	1.6e-12	1.49e-15	125	26.2648	1.37041
237986_at	1.62e-12	1.57e-15	124	26.2243	1.46267
214625_s_at	1.62e-12	1.64e-15	-123	26.1877	-1.12027	MINK1	misshapen-like kinase 1
1565611_at	1.62e-12	1.65e-15	123	26.1786	1.5996
211802_x_at	1.62e-12	1.67e-15	123	26.1688	1.30424	CACNA1G	calcium channel, voltage-dependent, T type, alpha 1G subunit
211037_s_at	1.62e-12	1.68e-15	123	26.1637	1.53449	MBOAT7	membrane bound O-acyltransferase domain containing 7
227841_at	1.62e-12	1.69e-15	-123	26.1588	-1.48569	AMDHD2	amidohydrolase domain containing 2
232844_at	1.73e-12	1.84e-15	122	26.0907	1.42211	IFT140	intraflagellar transport 140 homolog (Chlamydomonas)
236599_at	1.79e-12	1.93e-15	-121	26.0489	-1.52529
220080_at	1.82e-12	1.99e-15	121	26.0198	1.07706	FBXL8	F-box and leucine-rich repeat protein 8
213615_at	1.83e-12	2.04e-15	-120	26.0013	-1.72141	LPCAT3	lysophosphatidylcholine acyltransferase 3
1552445_a_at	1.84e-12	2.09e-15	120	25.9809	1.13726	ESX1	ESX homeobox 1
206944_at	1.9e-12	2.19e-15	119	25.9385	1.84938	HTR6	5-hydroxytryptamine (serotonin) receptor 6, G protein-coupled
1554128_at	1.96e-12	2.33e-15	119	25.8882	1.5511	ADIG	adipogenin
220246_at	1.96e-12	2.36e-15	118	25.876	1.22046	CAMK1D	calcium/calmodulin-dependent protein kinase ID
217269_s_at	1.96e-12	2.37e-15	118	25.8733	1.72322	TMPRSS15	transmembrane protease, serine 15
235160_at	2.27e-12	2.79e-15	116	25.7316	1.00216	ATF7	activating transcription factor 7
214542_x_at	2.28e-12	2.84e-15	116	25.7158	1.25891	HIST1H2AI	histone cluster 1, H2ai
1555374_at	2.36e-12	3e-15	115	25.6674	1.20664	TTL	tubulin tyrosine ligase
1558641_at	2.36e-12	3.02e-15	115	25.6625	1.00781	SPATA24	spermatogenesis associated 24
229320_at	2.62e-12	3.41e-15	114	25.5566	1.53474	KIAA1211L	KIAA1211-like
232357_at	2.68e-12	3.53e-15	113	25.5255	1.16774	TTLL9	tubulin tyrosine ligase-like family, member 9
1563012_x_at	2.81e-12	3.75e-15	112	25.4725	1.97014
217205_at	2.87e-12	3.88e-15	-112	25.4416	-1.71021	LOC100420758	poly(A) binding protein, nuclear 1 pseudogene
204371_s_at	2.87e-12	3.94e-15	112	25.428	1.05205	KHSRP	KH-type splicing regulatory protein
205360_at	3.15e-12	4.38e-15	110	25.3352	1.2039
220583_at	3.3e-12	4.65e-15	-110	25.2823	-0.974608
219670_at	3.33e-12	4.75e-15	109	25.262	1.10216	BEND5	BEN domain containing 5
221379_at	3.34e-12	4.82e-15	109	25.2491	1.1293
203369_x_at	4.11e-12	6.06e-15	-106	25.0443	-1.3974	PDLIM7	PDZ and LIM domain 7 (enigma)
236744_at	4.11e-12	6.09e-15	-106	25.0407	-1.06141	PHPT1	phosphohistidine phosphatase 1
230297_x_at	4.18e-12	6.27e-15	106	25.0145	2.65872	SYNGAP1	synaptic Ras GTPase activating protein 1
240683_at	4.48e-12	6.8e-15	105	24.941	1.16454
1556717_at	4.7e-12	7.22e-15	104	24.8864	1.04413
241919_x_at	4.86e-12	7.64e-15	104	24.8348	1.43016	WDR31	WD repeat domain 31
220048_at	4.86e-12	7.64e-15	104	24.8345	1.27163	EDAR	ectodysplasin A receptor
221281_at	5.52e-12	8.78e-15	102	24.708	1.18453	SRC	v-src sarcoma (Schmidt-Ruppin A-2) viral oncogene homolog (avian)
238618_at	5.53e-12	9e-15	102	24.686	1.76072	NF2	neurofibromin 2 (merlin)
238397_at	5.53e-12	9.02e-15	102	24.6832	1.29002
1556178_x_at	5.53e-12	9.1e-15	101	24.675	1.03301	TAF8	TAF8 RNA polymerase II, TATA box binding protein (TBP)-associated factor, 43kDa
231255_at	5.7e-12	9.48e-15	101	24.6375	1.17726	MPRIP	myosin phosphatase Rho interacting protein
241415_at	5.78e-12	9.72e-15	101	24.6151	0.89962
1554683_a_at	5.82e-12	9.9e-15	101	24.5985	1.04592	MGC50722	uncharacterized MGC50722
202652_at	6e-12	1.03e-14	-100	24.5598	-1.13864	APBB1	amyloid beta (A4) precursor protein-binding, family B, member 1 (Fe65)
236228_at	6.13e-12	1.06e-14	-99.7	24.5312	-1.18699	LOC100130744	uncharacterized LOC100130744
229445_at	6.5e-12	1.14e-14	-98.9	24.4663	-1.02595	CYBA	cytochrome b-245, alpha polypeptide
201907_x_at	6.5e-12	1.15e-14	98.8	24.458	1.13819	DVL3	dishevelled segment polarity protein 3
1557666_s_at	6.92e-12	1.25e-14	97.9	24.3815	0.922306	AK8	adenylate kinase 8
218372_at	6.92e-12	1.25e-14	-97.9	24.3799	-1.61729	MED9	mediator complex subunit 9
211141_s_at	7.03e-12	1.29e-14	-97.6	24.3551	-0.930678	CNOT3	CCR4-NOT transcription complex, subunit 3
213468_at	7.03e-12	1.3e-14	97.4	24.3456	1.03599	ERCC2	excision repair cross-complementing rodent repair deficiency, complementation group 2
217341_at	7.03e-12	1.31e-14	97.3	24.3376	0.936144	DNM1	dynamin 1
210124_x_at	7.08e-12	1.33e-14	-97.2	24.3231	-0.898339	SEMA4F	sema domain, immunoglobulin domain (Ig), transmembrane domain (TM) and short cytoplasmic domain, (semaphorin) 4F
217142_at	7.29e-12	1.39e-14	96.7	24.2862	1.32844
234746_at	7.37e-12	1.42e-14	96.5	24.2674	1.76261
1558762_a_at	7.63e-12	1.48e-14	96	24.2256	1.31523	ZNF789	zinc finger protein 789
231493_at	7.87e-12	1.54e-14	95.6	24.1882	1.18839
240999_at	8.12e-12	1.6e-14	95.1	24.1504	0.903359	LOC100287704	uncharacterized LOC100287704
240929_at	8.19e-12	1.63e-14	-95	24.1338	-1.41989
207608_x_at	8.94e-12	1.8e-14	93.9	24.0429	2.45543	CYP1A2	cytochrome P450, family 1, subfamily A, polypeptide 2
221997_s_at	9.03e-12	1.84e-14	93.7	24.0214	0.833062	MRPL52	mitochondrial ribosomal protein L52
235317_at	9.03e-12	1.85e-14	93.6	24.017	1.84878	LOC284454	uncharacterized LOC284454
217509_x_at	9.26e-12	1.91e-14	93.2	23.9843	1.29943	GRIK5	glutamate receptor, ionotropic, kainate 5
1569496_s_at	9.54e-12	2e-14	92.8	23.9426	1.06191	LOC100130872	uncharacterized LOC100130872
1559616_x_at	9.54e-12	2.01e-14	92.7	23.9403	1.07043	ZNF626	zinc finger protein 626
237147_at	9.56e-12	2.03e-14	92.6	23.9301	1.35064
241246_at	9.96e-12	2.14e-14	92.1	23.8795	1.0444
210414_at	9.96e-12	2.15e-14	92	23.8753	0.99338	FLRT1	fibronectin leucine rich transmembrane protein 1
230155_x_at	1.01e-11	2.2e-14	-91.8	23.8518	-0.925376	MSL1	male-specific lethal 1 homolog (Drosophila)
240615_at	1.01e-11	2.21e-14	91.7	23.8467	1.07692	PTOV1-AS1	PTOV1 antisense RNA 1
215996_at	1.01e-11	2.25e-14	91.5	23.8322	0.962055
215437_x_at	1.01e-11	2.25e-14	91.5	23.8309	1.52181	BAZ2A	bromodomain adjacent to zinc finger domain, 2A
227097_at	1.01e-11	2.28e-14	91.4	23.8199	1.42759	ZNF800	zinc finger protein 800
209880_s_at	1.01e-11	2.3e-14	-91.3	23.8123	-1.28159	SELPLG	selectin P ligand
208535_x_at	1.07e-11	2.44e-14	90.7	23.7554	1.31664	COL13A1	collagen, type XIII, alpha 1
206869_at	1.09e-11	2.52e-14	90.4	23.7245	1.51702	CHAD	chondroadherin
233918_at	1.09e-11	2.52e-14	90.4	23.7233	1.48433	DCDC2B	doublecortin domain containing 2B
1560874_at	1.12e-11	2.62e-14	90	23.6868	0.904285	EFCAB4B	EF-hand calcium binding domain 4B
244889_at	1.2e-11	2.83e-14	89.2	23.6139	1.15337	LOC388210	uncharacterized LOC388210
214644_at	1.21e-11	2.88e-14	89	23.5955	1.32651	HIST1H2AK	histone cluster 1, H2ak
234143_at	1.22e-11	2.92e-14	88.9	23.5848	1.18401
211497_x_at	1.23e-11	2.98e-14	88.7	23.5649	0.885753	NKX3-1	NK3 homeobox 1
223410_s_at	1.27e-11	3.08e-14	88.3	23.5319	0.824732
1557532_at	1.3e-11	3.18e-14	88	23.5014	1.80728	NDUFA7	NADH dehydrogenase (ubiquinone) 1 alpha subcomplex, 7, 14.5kDa
238541_at	1.31e-11	3.23e-14	-87.8	23.4862	-0.825818	C21orf58	chromosome 21 open reading frame 58
233285_at	1.33e-11	3.3e-14	87.6	23.466	1.37866
215369_at	1.35e-11	3.38e-14	87.4	23.4433	1.76523
231723_at	1.38e-11	3.5e-14	87	23.4111	1.37972	SNX12	sorting nexin 12
1554231_a_at	1.42e-11	3.61e-14	86.7	23.3797	1.06796	ZNF396	zinc finger protein 396
1564069_at	1.53e-11	3.94e-14	85.9	23.2949	0.880627	HOTTIP	HOXA distal transcript antisense RNA
234668_at	1.53e-11	3.95e-14	85.8	23.2945	1.15841	ALG13	ALG13, UDP-N-acetylglucosaminyltransferase subunit
220695_at	1.58e-11	4.09e-14	85.5	23.2596	1.09389
1568929_at	1.63e-11	4.29e-14	-85	23.2131	-0.876235	LOC100128343	uncharacterized LOC100128343
204323_x_at	1.63e-11	4.3e-14	85	23.2114	0.809493	NF1	neurofibromin 1
232988_at	1.69e-11	4.49e-14	-84.6	23.1687	-0.870182	GSE1	Gse1 coiled-coil protein
241514_at	1.72e-11	4.59e-14	84.4	23.1491	1.0861
1554475_a_at	1.77e-11	4.76e-14	-84	23.1127	-0.721134	C19orf47	chromosome 19 open reading frame 47
234948_at	1.77e-11	4.78e-14	84	23.1091	0.907463	SLC27A5	solute carrier family 27 (fatty acid transporter), member 5
1554192_s_at	1.86e-11	5.07e-14	-83.4	23.0522	-1.02537	TRMT44	tRNA methyltransferase 44 homolog (S. cerevisiae)
1562698_x_at	1.86e-11	5.18e-14	83.2	23.0316	0.947904	LOC339988	uncharacterized LOC339988
223747_x_at	1.86e-11	5.18e-14	83.2	23.0312	1.48584	WWOX	WW domain containing oxidoreductase
233454_at	1.86e-11	5.19e-14	83.2	23.0286	1.38021	POLN	polymerase (DNA directed) nu
230613_at	1.86e-11	5.25e-14	83.1	23.0177	1.1094	GMEB1	glucocorticoid modulatory element binding protein 1
1561571_at	1.86e-11	5.27e-14	-83.1	23.0133	-0.929743	LOC730139	uncharacterized LOC730139
239396_at	1.86e-11	5.28e-14	-83	23.0114	-1.209
215788_at	2e-11	5.69e-14	82.3	22.9385	0.811939	C1orf222	chromosome 1 open reading frame 222
1565715_at	2.09e-11	6e-14	81.8	22.8876	0.836632	FUS	fused in sarcoma
234943_at	2.09e-11	6.04e-14	81.8	22.8807	0.985172	LOC400927///CSNK1E	TPTE and PTEN homologous inositol lipid phosphatase pseudogene///casein kinase 1, epsilon
237337_at	2.12e-11	6.17e-14	-81.6	22.8604	-1.04782
1557135_at	2.13e-11	6.23e-14	81.5	22.8503	0.988935	LOC100996344	uncharacterized LOC100996344
214901_at	2.13e-11	6.29e-14	-81.4	22.841	-0.760848	ZNF8	zinc finger protein 8
1557280_s_at	2.13e-11	6.32e-14	81.4	22.8376	0.894099	ITSN1	intersectin 1 (SH3 domain protein)
242933_at	2.13e-11	6.43e-14	-81.2	22.8193	-0.89127
1554173_at	2.13e-11	6.45e-14	81.2	22.8169	0.758426	CD300LB	CD300 molecule-like family member b
238527_at	2.13e-11	6.49e-14	81.1	22.8114	1.00548
240642_at	2.13e-11	6.51e-14	81.1	22.8071	0.949347	ZMYM2	zinc finger, MYM-type 2
220056_at	2.13e-11	6.54e-14	81	22.8039	0.852836	IL22RA1	interleukin 22 receptor, alpha 1
233806_at	2.13e-11	6.54e-14	81	22.8026	0.926884
207193_at	2.16e-11	6.69e-14	-80.8	22.7813	-0.845729	AGRP	agouti related protein homolog (mouse)
220258_s_at	2.17e-11	6.73e-14	80.8	22.775	0.864851	WRAP53	WD repeat containing, antisense to TP53
235861_at	2.22e-11	6.95e-14	80.5	22.7441	1.14358
1559028_at	2.23e-11	7.02e-14	-80.4	22.7333	-0.87552	C21orf15	chromosome 21 open reading frame 15
1570541_s_at	2.25e-11	7.13e-14	-80.2	22.7187	-1.11064	GBP1P1	guanylate binding protein 1, interferon-inducible pseudogene 1
213837_at	2.32e-11	7.37e-14	79.9	22.6858	0.819744	L3MBTL1	l(3)mbt-like 1 (Drosophila)
222937_s_at	2.53e-11	8.1e-14	79.1	22.5936	0.995425	MMP28	matrix metallopeptidase 28
215492_x_at	2.6e-11	8.37e-14	78.8	22.5608	0.718729	PTCRA	pre T-cell antigen receptor alpha
1556319_at	2.67e-11	8.63e-14	78.5	22.5304	0.863427	LOC283270	uncharacterized LOC283270
1554117_at	2.7e-11	8.78e-14	78.4	22.5143	1.1579	CCDC60	coiled-coil domain containing 60
1558431_at	2.72e-11	8.91e-14	78.2	22.4996	0.961609	NHLRC4	NHL repeat containing 4
1555021_a_at	2.8e-11	9.21e-14	-77.9	22.4666	-1.15602	SCARF1	scavenger receptor class F, member 1
232517_s_at	2.82e-11	9.32e-14	77.8	22.4545	1.05278	HELZ2	helicase with zinc finger 2, transcriptional coactivator
238789_at	2.82e-11	9.38e-14	77.8	22.4483	1.04842	KANK1	KN motif and ankyrin repeat domains 1
220490_at	2.85e-11	9.58e-14	77.6	22.4276	1.20615	SERINC2	serine incorporator 2
237041_x_at	2.85e-11	9.6e-14	77.6	22.4251	0.867005	RCOR1	REST corepressor 1
202222_s_at	2.91e-11	9.84e-14	77.3	22.4014	1.77998	DES	desmin
205797_s_at	2.93e-11	9.99e-14	77.2	22.3859	1.52273	TCP11L1	t-complex 11, testis-specific-like 1
209957_s_at	2.93e-11	1.01e-13	77.1	22.3796	0.882081	NPPA	natriuretic peptide A
210483_at	2.93e-11	1.01e-13	77.1	22.3769	0.79795	LOC254896	uncharacterized LOC254896
233287_at	3.14e-11	1.09e-13	-76.4	22.2983	-1.03921	SLC6A17	solute carrier family 6, member 17
1553843_at	3.14e-11	1.09e-13	76.4	22.2975	0.756174	C10orf67	chromosome 10 open reading frame 67
220782_x_at	3.15e-11	1.11e-13	76.3	22.2858	0.865636	KLK12	kallikrein-related peptidase 12
234345_at	3.15e-11	1.11e-13	76.3	22.2803	0.809727
220256_s_at	3.15e-11	1.12e-13	-76.2	22.2701	-0.82297	OXCT2	3-oxoacid CoA transferase 2
242416_at	3.15e-11	1.13e-13	76.1	22.2647	0.976885
1554372_at	3.15e-11	1.14e-13	76.1	22.2574	0.940356
239666_at	3.15e-11	1.14e-13	76.1	22.2558	0.782592	PYGO2	pygopus homolog 2 (Drosophila)
239670_at	3.15e-11	1.14e-13	-76	22.2513	-0.97162
233572_s_at	3.15e-11	1.14e-13	76	22.2511	0.806456	BCORL1	BCL6 corepressor-like 1
1559402_a_at	3.15e-11	1.15e-13	76	22.2497	1.65868	C1orf61	chromosome 1 open reading frame 61
239242_at	3.18e-11	1.17e-13	-75.9	22.2328	-0.7571	SLC25A5-AS1	SLC25A5 antisense RNA 1
1560100_at	3.18e-11	1.17e-13	75.8	22.2292	0.772639	DLX1	distal-less homeobox 1
230414_s_at	3.26e-11	1.2e-13	75.6	22.2012	1.17413	TMEM170A	transmembrane protein 170A
208417_at	3.28e-11	1.22e-13	75.5	22.1896	2.05151	FGF6	fibroblast growth factor 6
228922_at	3.28e-11	1.22e-13	75.4	22.1851	1.02297	SHF	Src homology 2 domain containing F
239209_at	3.31e-11	1.24e-13	75.3	22.1699	0.951201
240398_at	3.4e-11	1.29e-13	75	22.1357	1.65474
231407_s_at	3.4e-11	1.29e-13	75	22.1351	1.0754	FOXH1	forkhead box H1
230476_at	3.58e-11	1.36e-13	74.5	22.0779	0.821406
1561190_at	3.69e-11	1.41e-13	74.2	22.0414	0.830158	CDKL3	cyclin-dependent kinase-like 3
214630_at	3.69e-11	1.42e-13	74.2	22.038	0.834428	CYP11B2	cytochrome P450, family 11, subfamily B, polypeptide 2
1556864_at	3.94e-11	1.52e-13	73.6	21.9672	0.689779	TCTN1	tectonic family member 1
217039_x_at	4.05e-11	1.57e-13	-73.3	21.9353	-0.938547	IGHG1	immunoglobulin heavy constant gamma 1 (G1m marker)
214387_x_at	4.06e-11	1.58e-13	73.3	21.9298	0.83938	SFTPC	surfactant protein C
241237_at	4.14e-11	1.63e-13	73	21.9007	0.704341
1562002_at	4.14e-11	1.64e-13	73	21.8927	0.712043	MYOZ3	myozenin 3
226681_at	4.14e-11	1.64e-13	73	21.8918	0.698855
1561610_at	4.14e-11	1.64e-13	72.9	21.89	0.754659
1552558_a_at	4.15e-11	1.66e-13	72.9	21.8832	0.697234	RAI1	retinoic acid induced 1
236206_at	4.23e-11	1.69e-13	72.7	21.8599	0.891288	FAM53A	family with sequence similarity 53, member A
1552769_at	4.25e-11	1.71e-13	72.6	21.8508	0.86528	ZNF625	zinc finger protein 625
1557690_x_at	4.27e-11	1.73e-13	-72.5	21.8407	-0.773061
232525_at	4.32e-11	1.75e-13	72.4	21.8254	0.614879
204724_s_at	4.37e-11	1.78e-13	72.3	21.81	1.03032	COL9A3	collagen, type IX, alpha 3
207025_at	4.47e-11	1.83e-13	-72	21.7819	-0.69181	GJC2	gap junction protein, gamma 2, 47kDa
1553438_at	4.47e-11	1.84e-13	72	21.7766	1.02153
36004_at	4.51e-11	1.86e-13	71.9	21.7649	1.57634	IKBKG	inhibitor of kappa light polypeptide gene enhancer in B-cells, kinase gamma
206458_s_at	4.88e-11	2.03e-13	-71.2	21.6806	-0.865086	WNT2B	wingless-type MMTV integration site family, member 2B
207123_s_at	4.95e-11	2.06e-13	71.1	21.6621	1.26058	MATN4	matrilin 4
1557712_x_at	4.95e-11	2.08e-13	71	21.6545	1.81167
242079_at	4.95e-11	2.08e-13	-71	21.6533	-0.702931	RGS12	regulator of G-protein signaling 12
220558_x_at	5.08e-11	2.15e-13	-70.8	21.6221	-0.779023	TSPAN32	tetraspanin 32
217672_x_at	5.27e-11	2.24e-13	70.4	21.5797	2.38797	EIF1	eukaryotic translation initiation factor 1
227365_at	5.44e-11	2.32e-13	70.1	21.545	0.894037	ATCAY	ataxia, cerebellar, Cayman type
206019_at	5.56e-11	2.38e-13	-69.9	21.5188	-0.886716	RBM19	RNA binding motif protein 19
210126_at	5.67e-11	2.44e-13	-69.7	21.4934	-1.03978	PSG9	pregnancy specific beta-1-glycoprotein 9
209874_x_at	5.67e-11	2.45e-13	69.7	21.488	0.689888	CNNM2	cyclin M2
1560214_at	5.67e-11	2.46e-13	-69.7	21.4856	-0.872394	SPG11	spastic paraplegia 11 (autosomal recessive)
1566003_x_at	5.68e-11	2.48e-13	69.6	21.4754	1.00342
1567539_at	5.68e-11	2.48e-13	-69.6	21.4742	-0.752996	MFGE8	milk fat globule-EGF factor 8 protein
1554583_a_at	5.69e-11	2.5e-13	69.5	21.4691	0.823219	METTL20	methyltransferase like 20
1554103_at	5.84e-11	2.58e-13	-69.3	21.4378	-0.643465
1569614_s_at	6.03e-11	2.67e-13	-69	21.4013	-0.75564	LCN8	lipocalin 8
216345_at	6.05e-11	2.69e-13	69	21.3948	1.0427	ZSWIM8	zinc finger, SWIM-type containing 8
223990_at	6.17e-11	2.75e-13	68.8	21.3708	0.982807	C4orf17	chromosome 4 open reading frame 17
1554346_at	6.3e-11	2.82e-13	68.6	21.3453	0.698582	GNB5	guanine nucleotide binding protein (G protein), beta 5
1560439_at	6.37e-11	2.87e-13	-68.5	21.33	-0.795195	LINGO3	leucine rich repeat and Ig domain containing 3
231518_at	6.76e-11	3.07e-13	67.9	21.2614	0.689703	LINC00922	long intergenic non-protein coding RNA 922
230254_at	6.76e-11	3.07e-13	67.9	21.2609	0.667947	FAM26E	family with sequence similarity 26, member E
240584_at	6.86e-11	3.13e-13	67.8	21.2392	1.11593
213919_at	6.86e-11	3.14e-13	67.7	21.238	0.616749	DNAJC4	DnaJ (Hsp40) homolog, subfamily C, member 4
210106_at	6.87e-11	3.15e-13	-67.7	21.2323	-0.940506	RDH5	retinol dehydrogenase 5 (11-cis/9-cis)
210388_at	6.88e-11	3.17e-13	67.7	21.2276	1.13744	PLCB2	phospholipase C, beta 2
240840_s_at	7.05e-11	3.26e-13	67.4	21.1986	0.740227	SETD9	SET domain containing 9
1568666_at	7.21e-11	3.35e-13	67.2	21.17	1.19302	PLIN5	perilipin 5
230931_at	7.21e-11	3.36e-13	67.2	21.1672	0.785439	PLG	plasminogen
205766_at	7.28e-11	3.41e-13	67.1	21.154	1.13556	TCAP	titin-cap
214398_s_at	7.35e-11	3.46e-13	67	21.1393	0.882398	IKBKE	inhibitor of kappa light polypeptide gene enhancer in B-cells, kinase epsilon
215479_at	7.47e-11	3.52e-13	66.9	21.12	0.659638
217129_at	7.54e-11	3.57e-13	-66.7	21.1057	-0.78883
211635_x_at	7.55e-11	3.59e-13	66.7	21.1003	0.70196	LOC100133862///IGHV4-31///IGHM///IGHG4///IGHG3///IGHG1///IGHD///IGHA2///IGHA1	Ig heavy chain V-I region V35-like///immunoglobulin heavy variable 4-31///immunoglobulin heavy constant mu///immunoglobulin heavy constant gamma 4 (G4m marker)///immunoglobulin heavy constant gamma 3 (G3m marker)///immunoglobulin heavy constant gamma 1 (G1m marker)///immunoglobulin heavy constant delta///immunoglobulin heavy constant alpha 2 (A2m marker)///immunoglobulin heavy constant alpha 1
240391_at	7.63e-11	3.64e-13	66.6	21.0866	0.929315	NDUFB2	NADH dehydrogenase (ubiquinone) 1 beta subcomplex, 2, 8kDa
206124_s_at	8.09e-11	3.88e-13	66.1	21.0227	0.761837	LLGL1	lethal giant larvae homolog 1 (Drosophila)
233212_at	8.11e-11	3.9e-13	-66.1	21.0159	-0.610515
1557120_at	8.28e-11	4e-13	65.9	20.9907	0.784736	EEF1A1	eukaryotic translation elongation factor 1 alpha 1
235805_at	8.44e-11	4.09e-13	-65.7	20.9676	-0.684393
208332_at	8.49e-11	4.13e-13	65.7	20.9581	0.692507	PRY	PTPN13-like, Y-linked
217532_x_at	8.6e-11	4.2e-13	65.5	20.9402	1.4317
241285_at	8.74e-11	4.32e-13	65.3	20.9118	0.688249
1562671_s_at	8.74e-11	4.32e-13	65.3	20.9116	0.796816
1569834_at	8.74e-11	4.32e-13	65.3	20.9113	0.617543
1568702_a_at	8.74e-11	4.33e-13	65.3	20.9087	0.934699	PAAF1	proteasomal ATPase-associated factor 1
231135_at	8.76e-11	4.36e-13	-65.2	20.9024	-0.801919	LOC151174	uncharacterized LOC151174
228556_at	8.77e-11	4.38e-13	65.2	20.8983	0.916502	YTHDC1	YTH domain containing 1
215153_at	8.82e-11	4.42e-13	65.1	20.8882	0.835246	NOS1AP	nitric oxide synthase 1 (neuronal) adaptor protein
215584_at	9.16e-11	4.61e-13	-64.8	20.8456	-1.00955	HECW1	HECT, C2 and WW domain containing E3 ubiquitin protein ligase 1
1555826_at	9.27e-11	4.7e-13	64.7	20.8256	1.1556	EPR1	effector cell peptidase receptor 1 (non-protein coding)
205156_s_at	9.27e-11	4.71e-13	-64.7	20.8224	-0.646656	ASIC1	acid-sensing (proton-gated) ion channel 1
230089_s_at	9.27e-11	4.71e-13	64.7	20.8224	0.819371	TMEM259	transmembrane protein 259
234858_at	9.3e-11	4.75e-13	64.6	20.8154	1.24283
242687_at	9.32e-11	4.77e-13	-64.6	20.8095	-0.78124	FAM160A1	family with sequence similarity 160, member A1
228192_at	9.37e-11	4.81e-13	-64.5	20.8011	-0.773511	MNF1	mitochondrial nucleoid factor 1
215517_at	9.38e-11	4.84e-13	-64.5	20.796	-0.761375	PYGO1	pygopus homolog 1 (Drosophila)
216330_s_at	9.44e-11	4.89e-13	64.4	20.786	0.72005	POU6F1	POU class 6 homeobox 1
215579_at	9.52e-11	4.96e-13	-64.3	20.7708	-0.648004	APOBEC3G	apolipoprotein B mRNA editing enzyme, catalytic polypeptide-like 3G
219339_s_at	9.52e-11	4.96e-13	64.3	20.7702	0.656082	EHMT1	euchromatic histone-lysine N-methyltransferase 1
1561387_a_at	9.52e-11	5e-13	64.2	20.7621	0.724068	NXPE1	neurexophilin and PC-esterase domain family, member 1
237235_at	9.52e-11	5.01e-13	-64.2	20.7605	-0.693638
229991_s_at	9.52e-11	5.02e-13	-64.2	20.7587	-0.714847	SYTL4	synaptotagmin-like 4
215266_at	9.58e-11	5.06e-13	64.1	20.7493	0.714021	DNAH3	dynein, axonemal, heavy chain 3
235832_at	9.61e-11	5.1e-13	-64.1	20.7427	-0.777972	NKX6-2	NK6 homeobox 2
228994_at	9.75e-11	5.19e-13	64	20.7246	0.68288	CCDC24	coiled-coil domain containing 24
230386_at	9.91e-11	5.29e-13	63.8	20.704	0.742467
1565604_at	9.93e-11	5.32e-13	63.8	20.6982	0.84935	PWP2	PWP2 periodic tryptophan protein homolog (yeast)
1552398_a_at	9.95e-11	5.35e-13	63.7	20.6924	0.903308	CLEC12A	C-type lectin domain family 12, member A
238082_at	1.01e-10	5.43e-13	63.6	20.6782	0.620857
216776_at	1.03e-10	5.57e-13	63.5	20.6522	0.602613
216668_at	1.03e-10	5.57e-13	63.4	20.6518	1.066
1562116_at	1.06e-10	5.79e-13	63.2	20.6114	1.12722
219900_s_at	1.07e-10	5.85e-13	63.1	20.6005	0.60356	ZNF446	zinc finger protein 446
1556015_a_at	1.08e-10	5.95e-13	-63	20.5837	-0.686933	MESP2	mesoderm posterior 2 homolog (mouse)
222208_s_at	1.1e-10	6.08e-13	62.8	20.5611	1.18066	POLR2J4	polymerase (RNA) II (DNA directed) polypeptide J4, pseudogene
244810_at	1.11e-10	6.12e-13	-62.8	20.5548	-0.705334
237747_at	1.13e-10	6.26e-13	62.6	20.5315	0.614938	LOC100507281	uncharacterized LOC100507281
1559127_x_at	1.13e-10	6.28e-13	62.6	20.5288	0.94643	RRP12	ribosomal RNA processing 12 homolog (S. cerevisiae)
1555620_a_at	1.16e-10	6.45e-13	62.4	20.4999	0.57202	PTGIR	prostaglandin I2 (prostacyclin) receptor (IP)
223472_at	1.18e-10	6.6e-13	62.2	20.4769	1.00384	WHSC1	Wolf-Hirschhorn syndrome candidate 1
1564386_at	1.18e-10	6.63e-13	62.2	20.4728	0.826206	TXNDC8	thioredoxin domain containing 8 (spermatozoa)
229919_at	1.18e-10	6.64e-13	-62.2	20.4707	-0.591322
220427_at	1.18e-10	6.69e-13	62.1	20.4628	0.640727	OBSCN	obscurin, cytoskeletal calmodulin and titin-interacting RhoGEF
222318_at	1.19e-10	6.74e-13	62.1	20.4551	0.756616	ZNF324B	zinc finger protein 324B
1555268_a_at	1.19e-10	6.77e-13	-62	20.4512	-1.40162	GRID1	glutamate receptor, ionotropic, delta 1
1554519_at	1.19e-10	6.81e-13	62	20.4445	0.662639	CD80	CD80 molecule
224087_at	1.2e-10	6.89e-13	61.9	20.4332	0.652506
238939_at	1.2e-10	6.89e-13	61.9	20.432	0.511863	ADD1	adducin 1 (alpha)
210422_x_at	1.2e-10	6.9e-13	61.9	20.4304	0.547586	SLC11A1	solute carrier family 11 (proton-coupled divalent metal ion transporters), member 1
204549_at	1.2e-10	6.93e-13	61.9	20.4265	1.56135	IKBKE	inhibitor of kappa light polypeptide gene enhancer in B-cells, kinase epsilon
217473_x_at	1.21e-10	7.04e-13	61.8	20.4107	0.64011	SLC11A1	solute carrier family 11 (proton-coupled divalent metal ion transporters), member 1
228459_at	1.23e-10	7.13e-13	-61.7	20.3975	-1.20647	FAM84A	family with sequence similarity 84, member A
1561133_at	1.27e-10	7.42e-13	61.4	20.3555	0.705196
1564208_x_at	1.28e-10	7.51e-13	61.3	20.3443	1.69002	LINC00957	long intergenic non-protein coding RNA 957
1564413_at	1.31e-10	7.69e-13	61.1	20.3188	1.03643	FLJ36116	uncharacterized LOC388666
223587_s_at	1.33e-10	7.85e-13	61	20.2985	0.63281	AMN	amnion associated transmembrane protein
1568822_at	1.33e-10	7.85e-13	61	20.2978	1.75004	MTG2	mitochondrial ribosome-associated GTPase 2
1557848_at	1.33e-10	7.86e-13	61	20.2969	0.632137
214361_s_at	1.33e-10	7.89e-13	-61	20.2934	-0.620903	RGS12	regulator of G-protein signaling 12
1552686_at	1.33e-10	7.95e-13	60.9	20.2854	1.04827	CNBD2	cyclic nucleotide binding domain containing 2
241241_at	1.34e-10	8e-13	-60.9	20.2789	-0.749034	RPS14	ribosomal protein S14
229486_s_at	1.34e-10	8.02e-13	60.9	20.2762	1.11647	TMEM132A	transmembrane protein 132A
1561896_at	1.34e-10	8.05e-13	60.8	20.2724	0.638159	LOC100996578	uncharacterized LOC100996578
208497_x_at	1.4e-10	8.46e-13	-60.5	20.2206	-0.993617	NEUROG1	neurogenin 1
40640_at	1.41e-10	8.56e-13	60.4	20.208	0.657762	NCAPH2	non-SMC condensin II complex, subunit H2
234881_at	1.43e-10	8.71e-13	60.3	20.1908	1.89595
238150_at	1.44e-10	8.76e-13	60.2	20.1841	0.548714
242709_s_at	1.45e-10	8.86e-13	-60.2	20.173	-0.68077
216076_at	1.45e-10	8.88e-13	60.2	20.1703	0.779973	L3MBTL1	l(3)mbt-like 1 (Drosophila)
1565754_x_at	1.45e-10	8.94e-13	-60.1	20.1635	-0.633198	FGD2	FYVE, RhoGEF and PH domain containing 2
237443_at	1.47e-10	9.05e-13	-60	20.1506	-0.664603
234761_at	1.47e-10	9.07e-13	60	20.1482	0.555021
210050_at	1.47e-10	9.14e-13	60	20.1409	0.802838	TPI1	triosephosphate isomerase 1
207306_at	1.49e-10	9.3e-13	59.8	20.123	0.855524	TCF15	transcription factor 15 (basic helix-loop-helix)
1557452_at	1.49e-10	9.31e-13	59.8	20.1217	0.521956
234797_at	1.49e-10	9.35e-13	59.8	20.1175	0.800479
243246_at	1.49e-10	9.39e-13	59.8	20.1125	0.793693
219707_at	1.49e-10	9.4e-13	59.8	20.1112	0.66304	CPNE7	copine VII
205682_x_at	1.5e-10	9.45e-13	-59.7	20.1064	-0.789477	APOM	apolipoprotein M
1569091_at	1.51e-10	9.54e-13	59.7	20.0958	1.00424
222823_at	1.53e-10	9.69e-13	59.6	20.0799	0.639111	IPPK	inositol 1,3,4,5,6-pentakisphosphate 2-kinase
207767_s_at	1.53e-10	9.74e-13	59.5	20.0748	1.12949	EGR4	early growth response 4
1556378_a_at	1.53e-10	9.76e-13	-59.5	20.0727	-0.687523	LOC440896	uncharacterized LOC440896
213597_s_at	1.54e-10	9.86e-13	59.4	20.0622	0.724379	CTDSPL	CTD (carboxy-terminal domain, RNA polymerase II, polypeptide A) small phosphatase-like
237536_at	1.54e-10	9.87e-13	-59.4	20.0613	-1.43809	MAPT-AS1	MAPT antisense RNA 1
239949_at	1.54e-10	9.9e-13	59.4	20.0579	0.682451	THNSL2	threonine synthase-like 2 (S. cerevisiae)
1564010_at	1.55e-10	1e-12	-59.3	20.0446	-0.5683	CAST	calpastatin
244755_at	1.55e-10	1e-12	59.3	20.0425	0.774051
1557244_a_at	1.59e-10	1.03e-12	59.1	20.0132	1.15883
204968_at	1.61e-10	1.05e-12	59	19.9972	0.506633	C6orf47	chromosome 6 open reading frame 47
214335_at	1.61e-10	1.05e-12	-59	19.9964	-0.915733	RPL18	ribosomal protein L18
220538_at	1.64e-10	1.07e-12	58.9	19.9756	2.29793	ADM2	adrenomedullin 2
242327_x_at	1.64e-10	1.08e-12	58.8	19.9693	0.58905
222935_x_at	1.65e-10	1.09e-12	58.8	19.9619	1.04629	SLC39A8	solute carrier family 39 (zinc transporter), member 8
232134_at	1.65e-10	1.09e-12	-58.8	19.9604	-0.706547
206873_at	1.65e-10	1.1e-12	58.7	19.9528	0.751555	CA6	carbonic anhydrase VI
217270_s_at	1.66e-10	1.11e-12	58.7	19.9436	1.31457	DYRK1B	dual-specificity tyrosine-(Y)-phosphorylation regulated kinase 1B
235353_at	1.67e-10	1.11e-12	58.6	19.9361	0.679649	SEL1L3	sel-1 suppressor of lin-12-like 3 (C. elegans)
1555348_at	1.67e-10	1.12e-12	-58.6	19.932	-0.627956	TFAP2E	transcription factor AP-2 epsilon (activating enhancer binding protein 2 epsilon)
231999_at	1.67e-10	1.12e-12	58.6	19.9274	0.7985	ANKRD11	ankyrin repeat domain 11
239869_at	1.67e-10	1.12e-12	58.6	19.9272	1.12989
230123_at	1.67e-10	1.12e-12	-58.6	19.9271	-0.605832	NECAP2	NECAP endocytosis associated 2
223127_s_at	1.7e-10	1.15e-12	58.4	19.9018	0.64627	C1orf21	chromosome 1 open reading frame 21
1557889_at	1.73e-10	1.17e-12	-58.3	19.8834	-1.22418
219943_s_at	1.76e-10	1.2e-12	58.1	19.8585	0.775039	USP46	ubiquitin specific peptidase 46
1553710_at	1.76e-10	1.2e-12	58.1	19.858	1.12699	FAM218A	family with sequence similarity 218, member A
233661_at	1.78e-10	1.21e-12	58.1	19.8478	0.75698	LINC00557	long intergenic non-protein coding RNA 557
244285_at	1.78e-10	1.22e-12	58	19.8387	1.16404
242589_x_at	1.78e-10	1.22e-12	58	19.8375	0.791963
213368_x_at	1.78e-10	1.23e-12	-58	19.8357	-0.985991	PPFIA3	protein tyrosine phosphatase, receptor type, f polypeptide (PTPRF), interacting protein (liprin), alpha 3
207105_s_at	1.78e-10	1.23e-12	58	19.8328	1.56061	PIK3R2	phosphoinositide-3-kinase, regulatory subunit 2 (beta)
227302_s_at	1.79e-10	1.24e-12	-57.9	19.8279	-0.674059	LLGL1///FLII	lethal giant larvae homolog 1 (Drosophila)///flightless I homolog (Drosophila)
243698_at	1.79e-10	1.24e-12	57.9	19.8239	1.04485
1558174_at	1.8e-10	1.25e-12	-57.9	19.8171	-0.5907	FAM43A	family with sequence similarity 43, member A
207844_at	1.82e-10	1.27e-12	57.7	19.7966	0.628741	IL13	interleukin 13
229446_at	1.82e-10	1.27e-12	57.7	19.7955	0.62357
207442_at	1.83e-10	1.28e-12	-57.7	19.7884	-0.618519	CSF3	colony stimulating factor 3 (granulocyte)
229597_s_at	1.83e-10	1.29e-12	-57.7	19.7862	-2.38108	WDFY4	WDFY family member 4
240178_at	1.83e-10	1.29e-12	57.6	19.7824	0.670225
1557908_at	1.83e-10	1.29e-12	57.6	19.78	0.751417
237695_at	1.84e-10	1.3e-12	57.6	19.7732	0.894669
230500_at	1.84e-10	1.31e-12	57.6	19.7693	0.716077	PDE7A	phosphodiesterase 7A
229368_s_at	1.86e-10	1.32e-12	57.5	19.758	0.526353	ZFAND5	zinc finger, AN1-type domain 5
222293_at	1.88e-10	1.34e-12	-57.4	19.7422	-0.839107	CADM4	cell adhesion molecule 4
220466_at	1.88e-10	1.35e-12	-57.4	19.738	-0.685497	CCDC15	coiled-coil domain containing 15
241102_at	1.88e-10	1.35e-12	57.3	19.7364	0.927432
234081_at	1.88e-10	1.35e-12	57.3	19.7323	0.78263
1553499_s_at	1.94e-10	1.4e-12	57.1	19.6992	1.68618	SERPINA9	serpin peptidase inhibitor, clade A (alpha-1 antiproteinase, antitrypsin), member 9
239015_at	1.97e-10	1.42e-12	-57	19.6824	-0.75358	THAP7-AS1	THAP7 antisense RNA 1
229555_at	1.98e-10	1.43e-12	57	19.6746	1.11123	GALNT5	UDP-N-acetyl-alpha-D-galactosamine:polypeptide N-acetylgalactosaminyltransferase 5 (GalNAc-T5)
1561208_at	2.02e-10	1.47e-12	56.8	19.6467	0.784203
242160_at	2.04e-10	1.48e-12	-56.7	19.6385	-0.698414
1562933_at	2.05e-10	1.49e-12	56.7	19.6305	0.665257
211660_at	2.13e-10	1.56e-12	56.4	19.587	0.86222	POU2F2	POU class 2 homeobox 2
217636_at	2.13e-10	1.56e-12	56.4	19.582	0.818945	POLG	polymerase (DNA directed), gamma
230672_at	2.13e-10	1.57e-12	56.4	19.5803	1.25217
232147_at	2.17e-10	1.6e-12	56.2	19.5574	0.670753	SLX4	SLX4 structure-specific endonuclease subunit
236030_at	2.17e-10	1.61e-12	56.2	19.5543	1.64339	RCOR2	REST corepressor 2
203975_s_at	2.17e-10	1.61e-12	56.2	19.5517	0.610515	CHAF1A	chromatin assembly factor 1, subunit A (p150)
243400_x_at	2.17e-10	1.61e-12	-56.2	19.5508	-0.69225	LTBR	lymphotoxin beta receptor (TNFR superfamily, member 3)
205374_at	2.2e-10	1.64e-12	-56.1	19.5326	-0.629536	SLN	sarcolipin
231241_at	2.2e-10	1.64e-12	-56.1	19.5324	-0.653826	TAF5LP1	TAF5-like RNA polymerase II, p300/CBP-associated factor (PCAF)-associated factor, 65kDa pseudogene 1
216114_at	2.23e-10	1.67e-12	-56	19.5134	-0.542405	NCKIPSD	NCK interacting protein with SH3 domain
243695_at	2.23e-10	1.67e-12	-55.9	19.5115	-0.493882
221366_at	2.23e-10	1.67e-12	55.9	19.5114	0.602139	NKX6-1	NK6 homeobox 1
231387_at	2.24e-10	1.69e-12	55.9	19.503	0.677699	PXDC1	PX domain containing 1
1556593_s_at	2.24e-10	1.7e-12	55.9	19.4963	0.937262
1563577_at	2.24e-10	1.7e-12	55.9	19.4956	0.557701
239508_x_at	2.24e-10	1.7e-12	-55.8	19.4942	-0.61045	CCDC108	coiled-coil domain containing 108
211332_x_at	2.24e-10	1.7e-12	-55.8	19.4919	-0.550349	HFE	hemochromatosis
206430_at	2.24e-10	1.71e-12	55.8	19.489	1.90995	CDX1	caudal type homeobox 1
242141_at	2.25e-10	1.72e-12	-55.8	19.4827	-1.12186	HDAC2	histone deacetylase 2
213171_s_at	2.28e-10	1.75e-12	55.7	19.4666	0.563273	MMP24	matrix metallopeptidase 24 (membrane-inserted)
1553532_a_at	2.31e-10	1.77e-12	55.6	19.451	0.894158	ZNF341	zinc finger protein 341
228663_x_at	2.33e-10	1.79e-12	-55.5	19.4392	-0.621169	FIZ1	FLT3-interacting zinc finger 1
204882_at	2.33e-10	1.8e-12	-55.5	19.4352	-1.07897	ARHGAP25	Rho GTPase activating protein 25
208100_x_at	2.33e-10	1.8e-12	-55.5	19.4347	-0.553738	SEMA6C	sema domain, transmembrane domain (TM), and cytoplasmic domain, (semaphorin) 6C
243651_at	2.34e-10	1.82e-12	55.4	19.4247	0.547212	CPEB3	cytoplasmic polyadenylation element binding protein 3
220100_at	2.35e-10	1.82e-12	55.4	19.4216	0.583258	SLC22A11	solute carrier family 22 (organic anion/urate transporter), member 11
235600_at	2.35e-10	1.83e-12	-55.4	19.4152	-0.938945
210072_at	2.39e-10	1.86e-12	55.3	19.3989	0.819883	CCL19	chemokine (C-C motif) ligand 19
216228_s_at	2.41e-10	1.89e-12	55.2	19.3843	0.87291	WDHD1	WD repeat and HMG-box DNA binding protein 1
1552924_a_at	2.44e-10	1.91e-12	-55.1	19.3726	-0.832084	PITPNM2	phosphatidylinositol transfer protein, membrane-associated 2
235407_at	2.45e-10	1.92e-12	55.1	19.3657	0.799015
242561_at	2.45e-10	1.93e-12	-55	19.363	-0.756823	IPO9	importin 9
238814_at	2.45e-10	1.94e-12	55	19.3579	0.549942	SLC35C2	solute carrier family 35, member C2
204196_x_at	2.45e-10	1.94e-12	55	19.3568	0.669503	PKNOX1	PBX/knotted 1 homeobox 1
244011_at	2.45e-10	1.94e-12	55	19.3552	0.530881	PPM1K	protein phosphatase, Mg2+/Mn2+ dependent, 1K
1558304_s_at	2.45e-10	1.95e-12	55	19.35	2.21377	TSEN54	tRNA splicing endonuclease 54 homolog (S. cerevisiae)
222711_s_at	2.47e-10	1.98e-12	54.9	19.3371	0.601653	RHBDF1	rhomboid 5 homolog 1 (Drosophila)
209972_s_at	2.47e-10	1.98e-12	54.9	19.3354	0.624613	AIMP2	aminoacyl tRNA synthetase complex-interacting multifunctional protein 2
207370_at	2.47e-10	1.98e-12	-54.9	19.334	-0.663969	IBSP	integrin-binding sialoprotein
1570625_at	2.47e-10	1.98e-12	54.9	19.3335	0.637478	TCEB3	transcription elongation factor B (SIII), polypeptide 3 (110kDa, elongin A)
208115_x_at	2.52e-10	2.03e-12	54.7	19.3109	0.752315	C10orf137	chromosome 10 open reading frame 137
236574_at	2.56e-10	2.07e-12	54.6	19.29	1.3289	LOC284373	uncharacterized LOC284373
242433_at	2.57e-10	2.07e-12	-54.6	19.2868	-0.519057	ZBTB11	zinc finger and BTB domain containing 11
244858_at	2.61e-10	2.12e-12	54.5	19.2646	0.565386	TGIF1	TGFB-induced factor homeobox 1
243326_at	2.64e-10	2.15e-12	54.4	19.2513	0.957826
232870_at	2.67e-10	2.17e-12	54.3	19.2381	1.61743	HDAC10	histone deacetylase 10
1561502_x_at	2.68e-10	2.19e-12	54.3	19.2313	0.586675	CTU2	cytosolic thiouridylase subunit 2 homolog (S. pombe)
36907_at	2.68e-10	2.19e-12	54.2	19.229	0.967741	MVK	mevalonate kinase
238014_at	2.69e-10	2.21e-12	54.2	19.2211	0.67669	TMEM194B	transmembrane protein 194B
234696_at	2.71e-10	2.22e-12	54.2	19.2134	0.558815	LOC100509011///PRSS47	putative serine protease 47-like///protease, serine, 47
232743_at	2.73e-10	2.24e-12	54.1	19.2047	0.722315
216426_at	2.73e-10	2.26e-12	-54.1	19.1988	-0.791369
244280_at	2.78e-10	2.3e-12	-54	19.1805	-0.923203	LOC100507254	uncharacterized LOC100507254
1562940_at	2.78e-10	2.31e-12	53.9	19.1756	1.3608
205294_at	2.8e-10	2.32e-12	53.9	19.1673	0.725035	BAIAP2	BAI1-associated protein 2
236023_at	2.84e-10	2.36e-12	53.8	19.1498	0.834991	CDK9	cyclin-dependent kinase 9
240643_at	2.85e-10	2.38e-12	53.7	19.1438	0.605815	TTBK1	tau tubulin kinase 1
211768_at	2.88e-10	2.41e-12	53.7	19.1312	1.63603	LAT2	linker for activation of T cells family, member 2
1559073_at	2.9e-10	2.43e-12	53.6	19.1193	0.615147	KDM4B	lysine (K)-specific demethylase 4B
222733_x_at	2.9e-10	2.44e-12	53.6	19.1175	0.603545	RRP1	ribosomal RNA processing 1 homolog (S. cerevisiae)
1564658_at	2.93e-10	2.47e-12	53.5	19.1044	0.706874	NAT16	N-acetyltransferase 16 (GCN5-related, putative)
1560818_at	2.96e-10	2.49e-12	-53.5	19.0942	-0.551148
1562232_at	2.97e-10	2.51e-12	53.4	19.0851	0.933786
237165_at	2.97e-10	2.52e-12	53.4	19.0809	0.55536
219314_s_at	2.97e-10	2.52e-12	-53.4	19.0808	-0.464115	ZNF219	zinc finger protein 219
1561944_at	2.97e-10	2.53e-12	53.4	19.0789	0.911544
226144_at	2.97e-10	2.53e-12	-53.4	19.0773	-0.824046	REXO1	REX1, RNA exonuclease 1 homolog (S. cerevisiae)
210477_x_at	3.02e-10	2.58e-12	53.2	19.0571	0.522028	MAPK8	mitogen-activated protein kinase 8
229780_at	3.03e-10	2.59e-12	-53.2	19.0532	-0.512241	MTSS1	metastasis suppressor 1
1552887_at	3.07e-10	2.63e-12	53.1	19.0364	0.816464	TBATA	thymus, brain and testes associated
208532_x_at	3.07e-10	2.64e-12	-53.1	19.0339	-0.516878	KRTAP5-8	keratin associated protein 5-8
235799_at	3.07e-10	2.65e-12	53.1	19.0308	0.892816	NSL1	NSL1, MIND kinetochore complex component, homolog (S. cerevisiae)
234316_x_at	3.12e-10	2.69e-12	53	19.0121	0.535447	KLK12	kallikrein-related peptidase 12
244307_s_at	3.12e-10	2.7e-12	53	19.009	0.652665
1559072_a_at	3.14e-10	2.72e-12	52.9	19.0008	0.609151	ELFN2	extracellular leucine-rich repeat and fibronectin type III domain containing 2
1570055_at	3.15e-10	2.74e-12	-52.9	18.9942	-0.540058
1562861_at	3.15e-10	2.75e-12	52.9	18.9912	1.13204
243145_at	3.15e-10	2.75e-12	-52.9	18.9901	-0.61355
1555678_at	3.15e-10	2.75e-12	52.8	18.989	0.775999	ST3GAL3	ST3 beta-galactoside alpha-2,3-sialyltransferase 3
234132_at	3.18e-10	2.79e-12	52.8	18.9763	0.566792
237042_at	3.18e-10	2.8e-12	52.8	18.9723	0.607327
1559254_at	3.18e-10	2.8e-12	-52.7	18.9717	-0.561931	LINC00162	long intergenic non-protein coding RNA 162
235718_at	3.22e-10	2.84e-12	52.7	18.9557	0.868508	SRL	sarcalumenin
1560790_at	3.25e-10	2.87e-12	52.6	18.9453	0.986576	GOLGA6L2	golgin A6 family-like 2
213697_at	3.3e-10	2.92e-12	-52.5	18.9279	-0.513701	HIPK3	homeodomain interacting protein kinase 3
1565132_at	3.41e-10	3.02e-12	-52.3	18.8912	-0.676641	RBMY3AP	RNA binding motif protein, Y-linked, family 3, member A pseudogene
213157_s_at	3.42e-10	3.04e-12	52.2	18.8835	1.51919	WSCD1	WSC domain containing 1
243752_s_at	3.43e-10	3.06e-12	-52.2	18.8789	-0.577524	CYTH3	cytohesin 3
210169_at	3.43e-10	3.06e-12	-52.2	18.8781	-1.03551	SEC14L5	SEC14-like 5 (S. cerevisiae)
243047_at	3.48e-10	3.11e-12	52.1	18.8606	0.550806	FAM193B	family with sequence similarity 193, member B
237325_at	3.51e-10	3.15e-12	-52	18.8486	-0.498711	C22orf43	chromosome 22 open reading frame 43
210391_at	3.53e-10	3.17e-12	-52	18.8402	-0.555841	NR6A1	nuclear receptor subfamily 6, group A, member 1
244475_at	3.54e-10	3.18e-12	52	18.8369	0.544904
234575_at	3.6e-10	3.25e-12	51.8	18.8133	0.657178	ZNF71	zinc finger protein 71
229613_at	3.6e-10	3.25e-12	51.8	18.8131	0.530904
217693_x_at	3.6e-10	3.26e-12	-51.8	18.8122	-0.582062
242246_x_at	3.69e-10	3.35e-12	-51.7	18.7828	-0.540069	MIR770	microRNA 770
1560488_at	3.69e-10	3.36e-12	51.7	18.7803	1.01629	LCNL1	lipocalin-like 1
210984_x_at	3.69e-10	3.36e-12	51.7	18.7782	1.37943	EGFR	epidermal growth factor receptor
1563361_at	3.73e-10	3.4e-12	-51.6	18.7668	-0.601627	RNF216	ring finger protein 216
211002_s_at	3.73e-10	3.41e-12	-51.6	18.7646	-0.57593	TRIM29	tripartite motif containing 29
240054_at	3.73e-10	3.42e-12	51.6	18.7621	0.994658
1560856_at	3.77e-10	3.46e-12	-51.5	18.7494	-0.746252	ARHGAP26-AS1	ARHGAP26 antisense RNA 1
1566994_at	3.79e-10	3.48e-12	51.4	18.7418	0.615549
208038_at	3.8e-10	3.5e-12	-51.4	18.7362	-0.669526	IL1RL2	interleukin 1 receptor-like 2
215488_at	3.81e-10	3.53e-12	51.4	18.7289	0.58822
215583_at	3.81e-10	3.53e-12	51.4	18.7283	2.0082	TMEM63A	transmembrane protein 63A
232998_at	3.81e-10	3.53e-12	51.4	18.7279	0.904717	TIGD4	tigger transposable element derived 4
1569737_a_at	3.81e-10	3.54e-12	-51.4	18.7257	-0.554913	CASKIN1	CASK interacting protein 1
228207_at	3.83e-10	3.57e-12	51.3	18.7165	1.26542	LOC100499489	uncharacterized LOC100499489
231146_at	3.83e-10	3.57e-12	51.3	18.7146	0.837052	FAM24B	family with sequence similarity 24, member B
211301_at	3.85e-10	3.6e-12	51.3	18.7068	0.681035	KCND3	potassium voltage-gated channel, Shal-related subfamily, member 3
1554385_a_at	3.88e-10	3.64e-12	-51.2	18.6945	-0.552386	PADI2	peptidyl arginine deiminase, type II
223812_at	3.88e-10	3.64e-12	51.2	18.694	0.538311	FAM178B	family with sequence similarity 178, member B
1555694_a_at	3.89e-10	3.66e-12	-51.2	18.6897	-0.504678	KCNIP3	Kv channel interacting protein 3, calsenilin
229032_at	3.89e-10	3.66e-12	51.2	18.6889	0.596087	WSCD2	WSC domain containing 2
244123_at	3.92e-10	3.7e-12	51.1	18.6772	1.00446
222648_at	4.01e-10	3.79e-12	50.9	18.6516	0.7979	TBC1D16	TBC1 domain family, member 16
230639_at	4.02e-10	3.81e-12	50.9	18.6475	0.672581	ICA1	islet cell autoantigen 1, 69kDa
215961_at	4.06e-10	3.86e-12	-50.8	18.6337	-0.574683	F12	coagulation factor XII (Hageman factor)
210100_s_at	4.09e-10	3.89e-12	50.8	18.6249	1.01288	ABCA2	ATP-binding cassette, sub-family A (ABC1), member 2
54051_at	4.13e-10	3.93e-12	-50.7	18.6133	-0.801739	PKNOX1	PBX/knotted 1 homeobox 1
238514_at	4.16e-10	3.97e-12	-50.7	18.6034	-0.473804	TMEM25	transmembrane protein 25
1557091_at	4.18e-10	4e-12	-50.6	18.5964	-0.990035	MAMSTR	MEF2 activating motif and SAP domain containing transcriptional regulator
1565562_at	4.18e-10	4.01e-12	50.6	18.5928	0.601403	MAGIX	MAGI family member, X-linked
236997_at	4.19e-10	4.02e-12	50.6	18.5903	0.882677	LOC100505554	uncharacterized LOC100505554
236080_at	4.22e-10	4.06e-12	50.6	18.5809	0.715355	LOC100507670	uncharacterized LOC100507670
1553207_at	4.24e-10	4.08e-12	50.5	18.574	0.954631	ARL10	ADP-ribosylation factor-like 10
239414_at	4.24e-10	4.1e-12	50.5	18.57	0.638692
221603_at	4.26e-10	4.13e-12	-50.5	18.5629	-0.478076	PEX16	peroxisomal biogenesis factor 16
235411_at	4.27e-10	4.14e-12	-50.4	18.5598	-0.777736	PGBD1	piggyBac transposable element derived 1
211398_at	4.28e-10	4.16e-12	50.4	18.5546	0.673599	FGFR2	fibroblast growth factor receptor 2
224172_at	4.32e-10	4.2e-12	50.4	18.544	0.755857
239075_at	4.34e-10	4.23e-12	50.3	18.5363	0.529414
1559960_x_at	4.47e-10	4.37e-12	50.1	18.5027	0.792885	SYCE1L	synaptonemal complex central element protein 1-like
235491_at	4.49e-10	4.4e-12	50.1	18.4949	0.878452	ZBTB10	zinc finger and BTB domain containing 10
221051_s_at	4.49e-10	4.41e-12	50.1	18.4924	1.27222	NMRK2	nicotinamide riboside kinase 2
243025_at	4.49e-10	4.41e-12	50.1	18.4913	0.589772
1568760_at	4.54e-10	4.47e-12	50	18.4779	0.626947	MYH11	myosin, heavy chain 11, smooth muscle
243961_at	4.55e-10	4.48e-12	50	18.4751	0.667458	LOC100505622	uncharacterized LOC100505622
79005_at	4.6e-10	4.54e-12	49.9	18.4606	0.728353	SLC35E1	solute carrier family 35, member E1
205297_s_at	4.64e-10	4.6e-12	-49.8	18.4472	-2.36243	CD79B	CD79b molecule, immunoglobulin-associated beta
231185_at	4.64e-10	4.6e-12	49.8	18.4471	0.546585	KIAA1161	KIAA1161
241725_at	4.64e-10	4.61e-12	49.8	18.4459	0.845716	E2F7	E2F transcription factor 7
210535_at	4.69e-10	4.67e-12	-49.8	18.4322	-1.02129	B9D1	B9 protein domain 1
215140_at	4.74e-10	4.73e-12	49.7	18.4188	0.520841
230504_at	4.74e-10	4.73e-12	49.7	18.4185	0.899782	CEACAM19	carcinoembryonic antigen-related cell adhesion molecule 19
239137_x_at	4.76e-10	4.77e-12	-49.6	18.4101	-0.563437	C6orf223	chromosome 6 open reading frame 223
1555016_at	4.95e-10	4.96e-12	49.4	18.3678	0.685628	IL16	interleukin 16
221032_s_at	4.99e-10	5.01e-12	49.3	18.3566	0.572323	TMPRSS5	transmembrane protease, serine 5
222042_x_at	5.3e-10	5.33e-12	49	18.2914	0.862953	MEX3D	mex-3 homolog D (C. elegans)
1556844_at	5.42e-10	5.46e-12	-48.9	18.2663	-0.599411	LOC100132078	uncharacterized LOC100132078
220730_at	5.42e-10	5.47e-12	-48.9	18.2632	-0.727792	ZNF778	zinc finger protein 778
203809_s_at	5.44e-10	5.51e-12	48.8	18.2574	1.18879	AKT2	v-akt murine thymoma viral oncogene homolog 2
206531_at	5.5e-10	5.57e-12	48.8	18.2446	0.496825	DPF1	D4, zinc and double PHD fingers family 1
228057_at	5.56e-10	5.64e-12	48.7	18.2314	0.851857	DDIT4L	DNA-damage-inducible transcript 4-like
1570371_a_at	5.56e-10	5.65e-12	-48.7	18.2293	-0.488323	EPT1	ethanolaminephosphotransferase 1 (CDP-ethanolamine-specific)
216153_x_at	5.58e-10	5.68e-12	48.6	18.2238	0.734938	RECK	reversion-inducing-cysteine-rich protein with kazal motifs
232607_at	5.58e-10	5.69e-12	-48.6	18.2218	-0.605158
228975_at	5.62e-10	5.75e-12	48.6	18.2105	0.484207	SP6	Sp6 transcription factor
231107_at	5.62e-10	5.76e-12	-48.6	18.2095	-0.642437
217045_x_at	5.62e-10	5.76e-12	48.6	18.209	0.769138	NCR2	natural cytotoxicity triggering receptor 2
208212_s_at	5.62e-10	5.78e-12	48.6	18.2062	0.566256	ALK	anaplastic lymphoma receptor tyrosine kinase
1559674_at	5.84e-10	6.02e-12	-48.3	18.1632	-0.464547	ZNF333	zinc finger protein 333
218690_at	5.84e-10	6.03e-12	-48.3	18.1615	-0.532174	PDLIM4	PDZ and LIM domain 4
237792_at	5.87e-10	6.07e-12	-48.3	18.1536	-0.498293
231705_at	5.87e-10	6.08e-12	48.3	18.1518	0.595782	HRSP12	heat-responsive protein 12
213968_at	5.89e-10	6.11e-12	48.2	18.1466	0.663215
231591_at	5.93e-10	6.16e-12	48.2	18.1386	0.82243	BHMT	betaine--homocysteine S-methyltransferase
239835_at	5.96e-10	6.21e-12	48.2	18.1302	1.30553	KBTBD8	kelch repeat and BTB (POZ) domain containing 8
211590_x_at	5.98e-10	6.24e-12	-48.1	18.1249	-0.465231	TBXA2R	thromboxane A2 receptor
217324_at	5.98e-10	6.25e-12	48.1	18.1228	0.760912
1561403_at	6.06e-10	6.34e-12	48	18.1072	0.483782	SOHLH1	spermatogenesis and oogenesis specific basic helix-loop-helix 1
1553919_at	6.07e-10	6.36e-12	48	18.1045	0.55852	C9orf62	chromosome 9 open reading frame 62
228966_at	6.24e-10	6.57e-12	47.8	18.0699	0.630108	PANK2	pantothenate kinase 2
227071_at	6.24e-10	6.57e-12	47.8	18.0697	1.13408	ZNF414	zinc finger protein 414
1564112_at	6.24e-10	6.58e-12	47.8	18.0682	0.430726	FAM71A	family with sequence similarity 71, member A
221854_at	6.25e-10	6.6e-12	47.8	18.065	0.495493	PKP1	plakophilin 1 (ectodermal dysplasia/skin fragility syndrome)
234298_at	6.3e-10	6.67e-12	47.8	18.0541	0.583152	MYCN	v-myc myelocytomatosis viral related oncogene, neuroblastoma derived (avian)
243156_at	6.3e-10	6.67e-12	47.8	18.0537	0.497778
216897_s_at	6.3e-10	6.69e-12	-47.7	18.0508	-0.542598	FAM76A	family with sequence similarity 76, member A
208052_x_at	6.3e-10	6.69e-12	47.7	18.0502	0.606974	CEACAM3	carcinoembryonic antigen-related cell adhesion molecule 3
222861_x_at	6.33e-10	6.74e-12	47.7	18.0422	0.545294	FBXO44	F-box protein 44
206894_at	6.35e-10	6.77e-12	47.7	18.0372	0.713863	APOA4	apolipoprotein A-IV
232753_at	6.37e-10	6.81e-12	47.7	18.0322	0.723191	ZNF346	zinc finger protein 346
238871_at	6.44e-10	6.9e-12	47.6	18.018	1.00223	MLLT4	myeloid/lymphoid or mixed-lineage leukemia (trithorax homolog, Drosophila); translocated to, 4
237764_at	6.44e-10	6.91e-12	47.6	18.0168	0.736487
1569193_at	6.44e-10	6.91e-12	-47.6	18.0158	-0.644812
1562729_at	6.58e-10	7.07e-12	-47.4	17.9912	-0.510935
1569963_at	6.59e-10	7.11e-12	-47.4	17.9857	-0.591771
1552396_at	6.59e-10	7.13e-12	47.4	17.9833	0.473665	WFDC6	WAP four-disulfide core domain 6
233339_s_at	6.59e-10	7.13e-12	47.4	17.9823	1.05173	ARID1B	AT rich interactive domain 1B (SWI1-like)
232428_at	6.59e-10	7.14e-12	47.4	17.9812	0.741568	MOGAT2	monoacylglycerol O-acyltransferase 2
1559075_s_at	6.65e-10	7.21e-12	47.3	17.9707	0.492306	BAHCC1	BAH domain and coiled-coil containing 1
230433_at	6.67e-10	7.24e-12	47.3	17.9657	0.615751	LOC729970	hCG2028352-like
1570357_at	6.75e-10	7.35e-12	47.2	17.9503	0.824756	STX8	syntaxin 8
238099_at	6.76e-10	7.37e-12	-47.2	17.9477	-0.457331
205325_at	6.76e-10	7.38e-12	-47.2	17.9466	-0.716755	PHYHIP	phytanoyl-CoA 2-hydroxylase interacting protein
232387_at	6.8e-10	7.43e-12	47.2	17.9382	0.389683	SYNRG	synergin, gamma
220842_at	6.8e-10	7.46e-12	47.2	17.935	0.827871	AHI1	Abelson helper integration site 1
214904_at	6.8e-10	7.46e-12	47.2	17.9341	0.753071	ZNF41	zinc finger protein 41
213563_s_at	6.83e-10	7.5e-12	-47.1	17.9282	-0.610462	TUBGCP2	tubulin, gamma complex associated protein 2
1553839_at	6.87e-10	7.56e-12	47.1	17.9204	0.628752	CCDC149	coiled-coil domain containing 149
222308_x_at	6.89e-10	7.6e-12	47.1	17.915	0.675427
237653_at	7.09e-10	7.83e-12	46.9	17.8828	0.458318
226827_at	7.1e-10	7.86e-12	46.9	17.8788	0.582743
235034_at	7.23e-10	8.01e-12	46.8	17.8587	1.03431	VTI1A	vesicle transport through interaction with t-SNAREs 1A
243131_x_at	7.27e-10	8.07e-12	46.7	17.851	1.05329
213800_at	7.27e-10	8.09e-12	46.7	17.8486	0.517765	CFH	complement factor H
217573_at	7.33e-10	8.17e-12	-46.7	17.8383	-0.467346	GRIN2C	glutamate receptor, ionotropic, N-methyl D-aspartate 2C
234922_s_at	7.4e-10	8.25e-12	46.6	17.8269	0.527713	NHSL1	NHS-like 1
231401_s_at	7.41e-10	8.28e-12	-46.6	17.824	-0.869651	MLX	MLX, MAX dimerization protein
1558837_a_at	7.41e-10	8.29e-12	-46.6	17.8222	-1.49626
240319_at	7.47e-10	8.37e-12	46.5	17.8121	0.663761
231393_x_at	7.48e-10	8.4e-12	46.5	17.8086	0.838967	ZBTB43	zinc finger and BTB domain containing 43
215251_at	7.51e-10	8.45e-12	-46.5	17.8021	-0.505866
224497_x_at	7.56e-10	8.52e-12	-46.4	17.793	-0.51449	HSD17B14	hydroxysteroid (17-beta) dehydrogenase 14
241862_x_at	7.65e-10	8.63e-12	46.4	17.7792	0.564272	C19orf45	chromosome 19 open reading frame 45
228068_at	7.66e-10	8.67e-12	46.3	17.7743	0.720495	GOLGA7B	golgin A7 family, member B
229041_s_at	7.66e-10	8.67e-12	-46.3	17.7743	-0.615498	ITGB2-AS1	ITGB2 antisense RNA 1
232821_at	7.67e-10	8.7e-12	-46.3	17.7707	-0.565589	GTSF1L	gametocyte specific factor 1-like
228175_at	7.71e-10	8.75e-12	-46.3	17.7642	-1.06533	SLC4A8	solute carrier family 4, sodium bicarbonate cotransporter, member 8
215669_at	7.76e-10	8.83e-12	46.3	17.7552	0.555864	HLA-DRB4	major histocompatibility complex, class II, DR beta 4
233258_at	7.79e-10	8.88e-12	46.2	17.7494	0.530382
240235_at	7.82e-10	8.93e-12	-46.2	17.7432	-0.865603	C10orf62	chromosome 10 open reading frame 62
1566740_at	7.84e-10	8.98e-12	46.2	17.7374	0.96359	PLCE1	phospholipase C, epsilon 1
229928_at	7.84e-10	8.98e-12	46.2	17.7374	1.1781	LOC100507265	uncharacterized LOC100507265
240345_x_at	7.86e-10	9.02e-12	46.1	17.732	0.600421
1556925_at	7.86e-10	9.02e-12	46.1	17.7319	0.495147	SMC3	structural maintenance of chromosomes 3
236676_at	7.89e-10	9.07e-12	46.1	17.7261	0.480529
1569887_a_at	7.9e-10	9.1e-12	46.1	17.7225	0.517096	FAM183CP	family with sequence similarity 183, member C, pseudogene
202849_x_at	7.91e-10	9.13e-12	-46.1	17.7193	-0.576776	GRK6	G protein-coupled receptor kinase 6
232062_at	7.95e-10	9.19e-12	-46	17.7129	-0.696967	ADCY1	adenylate cyclase 1 (brain)
214883_at	7.98e-10	9.24e-12	46	17.7063	0.503012	THRA	thyroid hormone receptor, alpha
211592_s_at	8.03e-10	9.31e-12	-46	17.6984	-1.62814	CACNA1C	calcium channel, voltage-dependent, L type, alpha 1C subunit
229375_at	8.07e-10	9.37e-12	45.9	17.6918	0.733389	PPIE	peptidylprolyl isomerase E (cyclophilin E)
1564399_a_at	8.07e-10	9.38e-12	45.9	17.6902	1.50179	ARMCX4	armadillo repeat containing, X-linked 4
214309_s_at	8.29e-10	9.66e-12	-45.8	17.6589	-0.476601
222107_x_at	8.29e-10	9.68e-12	45.8	17.6574	0.77503	LZTS1	leucine zipper, putative tumor suppressor 1
230327_at	8.43e-10	9.86e-12	45.7	17.6377	1.18057	LOC730098	uncharacterized LOC730098
228942_s_at	8.45e-10	9.9e-12	45.6	17.6326	0.819195	DAB2IP	DAB2 interacting protein
232050_at	8.45e-10	9.91e-12	45.6	17.6322	0.708788	FLJ42627	uncharacterized LOC645644
237623_at	8.45e-10	9.92e-12	45.6	17.631	0.450724	CST3	cystatin C
215676_at	8.7e-10	1.02e-11	45.5	17.5982	0.743013	BRF1	BRF1, RNA polymerase III transcription initiation factor 90 kDa subunit
241437_s_at	8.74e-10	1.03e-11	45.4	17.5914	0.539092	EP400NL	EP400 N-terminal like
217516_x_at	8.84e-10	1.04e-11	45.4	17.578	1.09912	ARVCF	armadillo repeat gene deleted in velocardiofacial syndrome
230978_at	8.89e-10	1.05e-11	45.3	17.5701	0.771364
243053_x_at	8.93e-10	1.06e-11	-45.3	17.5638	-0.698084	LOC100128079	uncharacterized LOC100128079
1562074_a_at	8.95e-10	1.06e-11	45.3	17.5591	0.785832	UNC13C	unc-13 homolog C (C. elegans)
236826_at	8.99e-10	1.07e-11	-45.3	17.5534	-1.03611	TTC39B	tetratricopeptide repeat domain 39B
230159_at	9.03e-10	1.07e-11	-45.2	17.5464	-0.508836	C1orf115	chromosome 1 open reading frame 115
211819_s_at	9.04e-10	1.08e-11	-45.2	17.5438	-0.555865	SORBS1	sorbin and SH3 domain containing 1
226928_x_at	9.12e-10	1.09e-11	45.2	17.5315	0.406163	SLC25A37	solute carrier family 25 (mitochondrial iron transporter), member 37
207979_s_at	9.12e-10	1.09e-11	-45.2	17.531	-0.644126	CD8B	CD8b molecule
213950_s_at	9.16e-10	1.1e-11	-45.1	17.525	-0.677087
236784_s_at	9.19e-10	1.1e-11	45.1	17.5193	0.53654	LOC646808	L antigen family, member 3 pseudogene
239039_at	9.25e-10	1.11e-11	-45.1	17.5108	-0.464406
215685_s_at	9.35e-10	1.12e-11	45	17.497	0.620252	DLX2	distal-less homeobox 2
1558889_at	9.35e-10	1.13e-11	-45	17.4959	-0.488934
239268_at	9.35e-10	1.13e-11	45	17.4944	0.496962	NDUFS1	NADH dehydrogenase (ubiquinone) Fe-S protein 1, 75kDa (NADH-coenzyme Q reductase)
207699_at	9.38e-10	1.13e-11	45	17.4893	1.03183	ZFHX2	zinc finger homeobox 2
229245_at	9.47e-10	1.14e-11	44.9	17.478	0.90276	PLEKHA6	pleckstrin homology domain containing, family A member 6
205249_at	9.49e-10	1.15e-11	-44.9	17.4742	-0.492778	EGR2	early growth response 2
230451_at	9.65e-10	1.17e-11	44.8	17.4548	0.572996	LOC100506974	uncharacterized LOC100506974
221713_s_at	9.73e-10	1.18e-11	-44.7	17.4437	-0.492569	MAP6D1	MAP6 domain containing 1
222297_x_at	9.75e-10	1.19e-11	44.7	17.44	1.05284	RPL18	ribosomal protein L18
212868_x_at	9.76e-10	1.19e-11	44.7	17.438	0.418874	MAPKAPK5-AS1	MAPKAPK5 antisense RNA 1
1558407_at	9.84e-10	1.2e-11	-44.7	17.427	-1.51086	PLEKHG2	pleckstrin homology domain containing, family G (with RhoGef domain) member 2
238981_at	9.89e-10	1.21e-11	44.6	17.4207	0.556415	TMEM223	transmembrane protein 223
244072_at	9.99e-10	1.22e-11	44.6	17.4081	0.54924
1565731_at	1e-09	1.23e-11	44.5	17.4028	0.474245	ALDH3B1	aldehyde dehydrogenase 3 family, member B1
206974_at	1.01e-09	1.24e-11	-44.5	17.3963	-0.652892	CXCR6	chemokine (C-X-C motif) receptor 6
240039_at	1.01e-09	1.24e-11	44.5	17.3913	1.01637
232888_at	1.01e-09	1.25e-11	-44.5	17.3879	-0.514696	ISM1	isthmin 1, angiogenesis inhibitor
1557754_at	1.01e-09	1.25e-11	44.5	17.3863	1.04649	LOC401068	uncharacterized LOC401068
213611_at	1.01e-09	1.25e-11	44.4	17.3825	0.675505	AQP5	aquaporin 5
220967_s_at	1.02e-09	1.27e-11	-44.4	17.3703	-1.30932	ZNF696	zinc finger protein 696
1558533_at	1.02e-09	1.27e-11	44.4	17.3687	0.814752	KRBA2	KRAB-A domain containing 2
209399_at	1.02e-09	1.27e-11	-44.4	17.3679	-0.438081	HLCS	holocarboxylase synthetase (biotin-(proprionyl-CoA-carboxylase (ATP-hydrolysing)) ligase)
212924_s_at	1.03e-09	1.28e-11	-44.3	17.3629	-0.621465	LSM4	LSM4 homolog, U6 small nuclear RNA associated (S. cerevisiae)
220783_at	1.03e-09	1.28e-11	-44.3	17.3596	-0.52884	MMP27	matrix metallopeptidase 27
211587_x_at	1.03e-09	1.29e-11	44.3	17.3513	0.502517	CHRNA3	cholinergic receptor, nicotinic, alpha 3 (neuronal)
229894_s_at	1.04e-09	1.3e-11	44.2	17.3413	0.467234	RAB43	RAB43, member RAS oncogene family
1555787_at	1.05e-09	1.31e-11	44.2	17.3301	0.833121	C11orf63	chromosome 11 open reading frame 63
1553190_s_at	1.08e-09	1.35e-11	44.1	17.3037	0.428418	PARD3B	par-3 partitioning defective 3 homolog B (C. elegans)
244157_x_at	1.09e-09	1.36e-11	44	17.2921	1.80448
1560977_a_at	1.09e-09	1.37e-11	44	17.2881	0.525872	BCL2L13	BCL2-like 13 (apoptosis facilitator)
209851_at	1.09e-09	1.37e-11	44	17.2837	0.810151	ZC3H13	zinc finger CCCH-type containing 13
229207_x_at	1.1e-09	1.38e-11	43.9	17.2778	0.503558	RNF187	ring finger protein 187
223945_x_at	1.1e-09	1.39e-11	43.9	17.2737	1.07786	RP9P	retinitis pigmentosa 9 pseudogene
1561685_a_at	1.1e-09	1.39e-11	-43.9	17.2723	-0.451694	LOC441178	uncharacterized LOC441178
227424_x_at	1.1e-09	1.39e-11	43.9	17.2694	0.909929	C21orf119	chromosome 21 open reading frame 119
1554911_at	1.1e-09	1.39e-11	43.9	17.2682	0.462202	ABCC11	ATP-binding cassette, sub-family C (CFTR/MRP), member 11
1558941_at	1.12e-09	1.42e-11	43.8	17.2464	0.493435	ZNF704	zinc finger protein 704
217024_x_at	1.14e-09	1.44e-11	-43.7	17.2315	-0.776919	SIRPA	signal-regulatory protein alpha
235214_at	1.15e-09	1.47e-11	-43.6	17.2133	-0.589869	LURAP1	leucine rich adaptor protein 1
242788_at	1.15e-09	1.47e-11	43.6	17.2112	0.743496	KDM4D	lysine (K)-specific demethylase 4D
227863_at	1.15e-09	1.47e-11	43.6	17.2108	0.496105	IFITM10	interferon induced transmembrane protein 10
1559989_at	1.16e-09	1.48e-11	43.6	17.2044	0.431277	TPM4	tropomyosin 4
235829_at	1.17e-09	1.5e-11	43.5	17.1907	0.62558	CAHM	colon adenocarcinoma hypermethylated (non-protein coding)
222957_at	1.19e-09	1.52e-11	43.5	17.174	1.98523	NEU4	sialidase 4
230157_at	1.19e-09	1.53e-11	43.4	17.1712	0.666066	CDH24	cadherin 24, type 2
217013_at	1.19e-09	1.53e-11	-43.4	17.1648	-0.514335	AZGP1P1	alpha-2-glycoprotein 1, zinc-binding pseudogene 1
244281_at	1.19e-09	1.54e-11	43.4	17.164	0.805272	REXO1	REX1, RNA exonuclease 1 homolog (S. cerevisiae)
206402_s_at	1.19e-09	1.54e-11	-43.4	17.1638	-0.787929	NPFF	neuropeptide FF-amide peptide precursor
1555546_a_at	1.19e-09	1.54e-11	-43.4	17.1605	-0.71001	POFUT2	protein O-fucosyltransferase 2
221717_at	1.19e-09	1.54e-11	43.4	17.1583	0.558602
233498_at	1.19e-09	1.54e-11	43.4	17.1579	0.637596	ERBB4	v-erb-a erythroblastic leukemia viral oncogene homolog 4 (avian)
240761_at	1.2e-09	1.55e-11	43.4	17.1522	0.440227
212965_at	1.2e-09	1.55e-11	43.4	17.1518	1.08767	HIC2	hypermethylated in cancer 2
240487_at	1.2e-09	1.55e-11	43.4	17.1509	0.8391
236702_at	1.2e-09	1.56e-11	43.3	17.1464	0.684399	RTFDC1	replication termination factor 2 domain containing 1
238943_at	1.2e-09	1.56e-11	43.3	17.145	0.992959	FIBCD1	fibrinogen C domain containing 1
205013_s_at	1.22e-09	1.59e-11	-43.2	17.1267	-0.868112	SPECC1L///ADORA2A	sperm antigen with calponin homology and coiled-coil domains 1-like///adenosine A2a receptor
208571_at	1.23e-09	1.6e-11	43.2	17.1188	0.906251	ANP32D///ANP32A	acidic (leucine-rich) nuclear phosphoprotein 32 family, member D///acidic (leucine-rich) nuclear phosphoprotein 32 family, member A
208160_at	1.23e-09	1.6e-11	-43.2	17.1169	-0.646474
216624_s_at	1.23e-09	1.61e-11	-43.2	17.1106	-0.525667	KMT2A	lysine (K)-specific methyltransferase 2A
228564_at	1.24e-09	1.63e-11	43.1	17.1017	1.0868	LOC375295	uncharacterized LOC375295
243304_at	1.25e-09	1.64e-11	43.1	17.0949	0.544116	LOC286109	uncharacterized LOC286109
230790_x_at	1.26e-09	1.66e-11	-43	17.08	-1.06611	FOXN3	forkhead box N3
1561141_at	1.26e-09	1.66e-11	43	17.0783	0.483514
1555746_at	1.26e-09	1.66e-11	43	17.0775	0.533083	CD79B	CD79b molecule, immunoglobulin-associated beta
233306_at	1.27e-09	1.68e-11	43	17.0675	0.484005
235064_s_at	1.27e-09	1.68e-11	43	17.0646	0.591546	C20orf196	chromosome 20 open reading frame 196
1554749_s_at	1.27e-09	1.69e-11	-42.9	17.0613	-0.444693	CLCNKB	chloride channel, voltage-sensitive Kb
230202_at	1.27e-09	1.69e-11	-42.9	17.0609	-0.630783	RELA	v-rel reticuloendotheliosis viral oncogene homolog A (avian)
232255_at	1.27e-09	1.69e-11	42.9	17.0595	0.573776	LOC401321	uncharacterized LOC401321
241123_at	1.27e-09	1.69e-11	42.9	17.0583	0.568073
1569474_at	1.29e-09	1.71e-11	-42.9	17.0467	-0.564388
1553178_a_at	1.29e-09	1.72e-11	-42.9	17.0454	-0.410933	SSTR3	somatostatin receptor 3
238404_x_at	1.29e-09	1.72e-11	42.9	17.0442	0.437623	SEZ6L2	seizure related 6 homolog (mouse)-like 2
1562254_at	1.29e-09	1.72e-11	42.9	17.0432	0.44272	STK35	serine/threonine kinase 35
227217_at	1.29e-09	1.73e-11	42.8	17.0387	1.33897	WNK2	WNK lysine deficient protein kinase 2
1554876_a_at	1.3e-09	1.74e-11	42.8	17.0302	1.02673	S100Z	S100 calcium binding protein Z
239940_at	1.3e-09	1.74e-11	42.8	17.0281	0.85442
1552456_a_at	1.31e-09	1.76e-11	42.8	17.0205	0.566651	MBD3L2	methyl-CpG binding domain protein 3-like 2
222160_at	1.31e-09	1.76e-11	-42.7	17.0194	-0.355014	AKAP8L	A kinase (PRKA) anchor protein 8-like
1560988_a_at	1.31e-09	1.77e-11	42.7	17.012	0.508795	LINC00556	long intergenic non-protein coding RNA 556
217588_at	1.31e-09	1.77e-11	42.7	17.0119	0.463753	CATSPER2P1///CATSPER2	cation channel, sperm associated 2 pseudogene 1///cation channel, sperm associated 2
1560661_x_at	1.31e-09	1.77e-11	42.7	17.0107	0.643157	LINC00342	long intergenic non-protein coding RNA 342
241410_at	1.32e-09	1.79e-11	-42.7	17.0019	-1.17168
229965_at	1.32e-09	1.8e-11	42.6	16.9962	0.654587
236776_at	1.33e-09	1.8e-11	42.6	16.9945	0.459474
211313_s_at	1.33e-09	1.8e-11	42.6	16.9929	1.01381	BAZ1B	bromodomain adjacent to zinc finger domain, 1B
230579_at	1.33e-09	1.81e-11	42.6	16.9897	0.783958	LOC728705	uncharacterized LOC728705
224388_s_at	1.33e-09	1.81e-11	42.6	16.9863	0.473963	COL25A1	collagen, type XXV, alpha 1
220981_x_at	1.33e-09	1.81e-11	42.6	16.9859	0.501182	NXF2	nuclear RNA export factor 2
205490_x_at	1.33e-09	1.82e-11	42.6	16.981	0.5406	GJB3	gap junction protein, beta 3, 31kDa
224338_s_at	1.34e-09	1.83e-11	42.6	16.9778	1.52475	RNF26	ring finger protein 26
221915_s_at	1.34e-09	1.84e-11	42.5	16.9695	0.509055	RANBP1	RAN binding protein 1
1554748_at	1.35e-09	1.86e-11	42.5	16.9612	0.636698	CLCNKB	chloride channel, voltage-sensitive Kb
232857_at	1.37e-09	1.88e-11	42.4	16.9463	0.80982	POLR3H	polymerase (RNA) III (DNA directed) polypeptide H (22.9kD)
215995_x_at	1.38e-09	1.89e-11	42.4	16.9398	1.09672
220406_at	1.38e-09	1.9e-11	-42.4	16.934	-0.53626	TGFB2	transforming growth factor, beta 2
1566678_at	1.38e-09	1.91e-11	42.3	16.9315	0.590979	MMP2	matrix metallopeptidase 2 (gelatinase A, 72kDa gelatinase, 72kDa type IV collagenase)
1569991_at	1.39e-09	1.92e-11	-42.3	16.9266	-0.533241	KY	kyphoscoliosis peptidase
230855_at	1.4e-09	1.94e-11	-42.3	16.915	-0.466965	GATA4	GATA binding protein 4
207192_at	1.41e-09	1.95e-11	-42.2	16.9074	-0.535481	DNASE1L2	deoxyribonuclease I-like 2
232942_at	1.41e-09	1.96e-11	-42.2	16.903	-0.443038	PYROXD2	pyridine nucleotide-disulphide oxidoreductase domain 2
219536_s_at	1.43e-09	1.99e-11	42.1	16.886	0.667192	ZFP64	ZFP64 zinc finger protein
217274_x_at	1.43e-09	1.99e-11	-42.1	16.8846	-0.496088	MYL4	myosin, light chain 4, alkali; atrial, embryonic
205985_x_at	1.43e-09	1.99e-11	-42.1	16.8835	-0.46608	CLCNKB	chloride channel, voltage-sensitive Kb
1559532_at	1.44e-09	2.01e-11	42.1	16.8754	0.433297	ARIH2OS	ariadne homolog 2 opposite strand
1569680_at	1.44e-09	2.01e-11	42.1	16.8739	0.63993
1560665_at	1.46e-09	2.04e-11	42	16.857	0.452664	SCPEP1	serine carboxypeptidase 1
211880_x_at	1.47e-09	2.06e-11	42	16.8484	0.422762	PCDHGA1	protocadherin gamma subfamily A, 1
1561103_at	1.47e-09	2.07e-11	42	16.8456	0.517541
242743_at	1.48e-09	2.08e-11	-41.9	16.8409	-0.456283	IL4R	interleukin 4 receptor
230065_at	1.48e-09	2.08e-11	41.9	16.837	0.649346	ZNF180	zinc finger protein 180
228265_at	1.48e-09	2.08e-11	41.9	16.8363	0.458195
1560069_at	1.49e-09	2.09e-11	41.9	16.8322	0.424793	PLEKHM3	pleckstrin homology domain containing, family M, member 3
211598_x_at	1.5e-09	2.12e-11	41.8	16.8195	0.833919	VIPR2	vasoactive intestinal peptide receptor 2
223999_at	1.5e-09	2.12e-11	41.8	16.8164	0.811375	PPIL2	peptidylprolyl isomerase (cyclophilin)-like 2
214634_at	1.53e-09	2.16e-11	41.7	16.7972	1.90144	HIST1H4I	histone cluster 1, H4i
1560943_s_at	1.54e-09	2.18e-11	41.7	16.7891	0.444859	PGD	phosphogluconate dehydrogenase
1552646_at	1.54e-09	2.18e-11	41.7	16.7863	1.07583	IL11RA	interleukin 11 receptor, alpha
236296_x_at	1.55e-09	2.2e-11	41.7	16.7783	0.420117	C8orf58	chromosome 8 open reading frame 58
1561740_at	1.55e-09	2.2e-11	41.7	16.778	0.542837
225015_s_at	1.59e-09	2.26e-11	41.5	16.7498	1.26034	STK40	serine/threonine kinase 40
1555221_at	1.59e-09	2.27e-11	41.5	16.7468	0.450977
217038_at	1.59e-09	2.27e-11	41.5	16.7459	0.429386
1569444_at	1.6e-09	2.28e-11	41.5	16.7397	0.491641
216434_at	1.6e-09	2.29e-11	41.5	16.7361	1.05841	TTC38	tetratricopeptide repeat domain 38
239379_at	1.61e-09	2.3e-11	41.4	16.7298	0.402013
1561537_at	1.61e-09	2.31e-11	41.4	16.7254	0.438928	LOC388906	opioid growth factor receptor pseudogene
216217_at	1.62e-09	2.32e-11	41.4	16.7198	1.30693	PLCL2	phospholipase C-like 2
228844_at	1.62e-09	2.33e-11	41.4	16.7183	0.53301	SLC13A5	solute carrier family 13 (sodium-dependent citrate transporter), member 5
231153_at	1.62e-09	2.33e-11	41.4	16.7177	0.441259	C16orf86	chromosome 16 open reading frame 86
1556154_a_at	1.62e-09	2.33e-11	-41.4	16.7151	-0.499461	SNAI3-AS1	SNAI3 antisense RNA 1
240306_at	1.63e-09	2.36e-11	-41.3	16.7038	-0.627465	LINC00312	long intergenic non-protein coding RNA 312
230575_at	1.64e-09	2.36e-11	41.3	16.7006	0.636511	MSRB2	methionine sulfoxide reductase B2
228300_at	1.64e-09	2.37e-11	-41.3	16.6968	-0.46576	CCDC103	coiled-coil domain containing 103
220560_at	1.64e-09	2.38e-11	41.3	16.6948	0.423917	C11orf21	chromosome 11 open reading frame 21
1560258_a_at	1.64e-09	2.38e-11	41.3	16.6937	0.661008
1558764_at	1.64e-09	2.38e-11	41.3	16.6925	0.945885
221625_at	1.65e-09	2.41e-11	41.2	16.682	0.559641	ZNF506	zinc finger protein 506
216365_x_at	1.66e-09	2.41e-11	41.2	16.6796	0.500947	IGLV3-19	immunoglobulin lambda variable 3-19
1553352_x_at	1.66e-09	2.41e-11	-41.2	16.6786	-0.417	ERVW-1	endogenous retrovirus group W, member 1
235403_at	1.67e-09	2.44e-11	41.2	16.6677	0.48823
239628_at	1.69e-09	2.47e-11	41.1	16.652	1.53283
238019_at	1.69e-09	2.48e-11	41.1	16.6504	0.643368	PLIN5	perilipin 5
1552412_a_at	1.69e-09	2.48e-11	41.1	16.6489	0.71916	DEFB106B///DEFB106A	defensin, beta 106B///defensin, beta 106A
234336_s_at	1.71e-09	2.51e-11	41	16.6359	0.529189	TTLL9	tubulin tyrosine ligase-like family, member 9
219695_at	1.72e-09	2.52e-11	-41	16.6323	-0.577372	SMPD3	sphingomyelin phosphodiesterase 3, neutral membrane (neutral sphingomyelinase II)
1566671_a_at	1.72e-09	2.54e-11	-41	16.6249	-0.374436	PDXK	pyridoxal (pyridoxine, vitamin B6) kinase
232186_at	1.72e-09	2.54e-11	-41	16.6247	-0.668409	FITM2	fat storage-inducing transmembrane protein 2
1563867_at	1.73e-09	2.55e-11	41	16.6206	0.48998	LOC283194	uncharacterized LOC283194
241580_at	1.73e-09	2.56e-11	40.9	16.6158	0.514625	ZNF518B	zinc finger protein 518B
234012_at	1.74e-09	2.57e-11	40.9	16.61	0.562413
205457_at	1.75e-09	2.59e-11	40.9	16.6034	0.428806	C6orf106	chromosome 6 open reading frame 106
222813_at	1.75e-09	2.59e-11	-40.9	16.6032	-0.912422	ZNF668	zinc finger protein 668
32540_at	1.75e-09	2.59e-11	40.9	16.6031	0.580592
1569909_at	1.75e-09	2.6e-11	40.9	16.5986	0.415979	KRT79	keratin 79
1558484_s_at	1.77e-09	2.64e-11	-40.8	16.582	-0.407993	LRRC27	leucine rich repeat containing 27
1560548_at	1.77e-09	2.64e-11	-40.8	16.5817	-0.753867
230054_at	1.78e-09	2.65e-11	40.8	16.5782	0.930436	LOC100507547	uncharacterized LOC100507547
207159_x_at	1.8e-09	2.7e-11	40.7	16.5598	0.661833	CRTC1	CREB regulated transcription coactivator 1
1557481_a_at	1.8e-09	2.7e-11	40.7	16.5588	0.981025	LINC00320	long intergenic non-protein coding RNA 320
216337_at	1.8e-09	2.7e-11	-40.7	16.5588	-0.500111
211439_at	1.8e-09	2.7e-11	-40.7	16.5566	-0.456793	SRSF7	serine/arginine-rich splicing factor 7
217335_at	1.82e-09	2.73e-11	40.6	16.5472	0.446824	FLJ11292	uncharacterized protein FLJ11292
227042_at	1.82e-09	2.73e-11	40.6	16.545	0.396347	YDJC	YdjC homolog (bacterial)
233077_at	1.83e-09	2.75e-11	-40.6	16.5396	-0.466844	NAV2-AS4	NAV2 antisense RNA 4
1569961_at	1.85e-09	2.79e-11	40.5	16.5233	0.683693
220529_at	1.85e-09	2.79e-11	-40.5	16.5231	-0.519973	FLJ11710	uncharacterized protein FLJ11710
204329_s_at	1.85e-09	2.8e-11	-40.5	16.5198	-1.1026	ZNF202	zinc finger protein 202
238247_at	1.87e-09	2.82e-11	-40.5	16.5108	-0.486447	LOC100506942	uncharacterized LOC100506942
243988_at	1.91e-09	2.88e-11	-40.4	16.4879	-0.544113
231708_at	1.91e-09	2.9e-11	-40.4	16.4821	-0.572521	C2CD3	C2 calcium-dependent domain containing 3
1561960_at	1.91e-09	2.9e-11	-40.4	16.4808	-0.407989	CSPG4P5	chondroitin sulfate proteoglycan 4 pseudogene 5
237077_at	1.92e-09	2.91e-11	-40.3	16.4761	-0.581226
1569294_at	1.92e-09	2.92e-11	40.3	16.4735	0.382476	RNF187	ring finger protein 187
239369_at	1.92e-09	2.92e-11	40.3	16.4729	0.654343	LCN8	lipocalin 8
222051_s_at	1.93e-09	2.94e-11	40.3	16.4674	0.749809	E2F5	E2F transcription factor 5, p130-binding
234627_at	1.93e-09	2.95e-11	40.3	16.4636	0.596447	FLJ21408	uncharacterized LOC400512
52651_at	1.94e-09	2.96e-11	-40.3	16.4589	-0.438771	COL8A2	collagen, type VIII, alpha 2
205424_at	1.94e-09	2.97e-11	40.3	16.4567	0.817152	TBKBP1	TBK1 binding protein 1
1566908_at	1.96e-09	3e-11	40.2	16.4442	0.692348	C9orf173	chromosome 9 open reading frame 173
239933_x_at	1.97e-09	3.03e-11	-40.2	16.4344	-1.19235	CCDC176	coiled-coil domain containing 176
204253_s_at	1.97e-09	3.03e-11	-40.2	16.4339	-0.467382	VDR	vitamin D (1,25- dihydroxyvitamin D3) receptor
232016_at	1.98e-09	3.04e-11	40.2	16.4319	0.70317	FAN1	FANCD2/FANCI-associated nuclease 1
216429_at	1.99e-09	3.06e-11	-40.1	16.4219	-0.418216
236497_at	1.99e-09	3.07e-11	-40.1	16.4209	-0.521671	LOC729683	uncharacterized LOC729683
236863_at	2.01e-09	3.1e-11	-40.1	16.4105	-0.992589	C17orf67	chromosome 17 open reading frame 67
216878_x_at	2.01e-09	3.1e-11	40	16.4081	0.611878	HAB1	B1 for mucin
1553889_at	2.02e-09	3.12e-11	40	16.4022	0.48265	MRGPRX2	MAS-related GPR, member X2
207413_s_at	2.03e-09	3.14e-11	40	16.3944	0.988224	SCN5A	sodium channel, voltage-gated, type V, alpha subunit
220445_s_at	2.04e-09	3.16e-11	40	16.3897	0.458138	CSAG2///CSAG3	CSAG family, member 2///CSAG family, member 3
237944_at	2.05e-09	3.18e-11	39.9	16.3829	0.464822	LRRFIP1	leucine rich repeat (in FLII) interacting protein 1
231615_at	2.07e-09	3.21e-11	39.9	16.3722	0.559613
242941_x_at	2.07e-09	3.22e-11	39.9	16.3669	0.999047	TBX1	T-box 1
215365_at	2.09e-09	3.25e-11	39.8	16.3586	0.709128	CACNB2	calcium channel, voltage-dependent, beta 2 subunit
205666_at	2.11e-09	3.29e-11	39.8	16.3468	0.439708	FMO1	flavin containing monooxygenase 1
207484_s_at	2.11e-09	3.3e-11	39.8	16.3435	0.379007	EHMT2	euchromatic histone-lysine N-methyltransferase 2
244516_at	2.13e-09	3.32e-11	39.7	16.3356	0.641407
243705_at	2.13e-09	3.33e-11	39.7	16.3315	0.962333	DDHD1	DDHD domain containing 1
206110_at	2.13e-09	3.33e-11	39.7	16.3311	0.419347	HIST1H3H	histone cluster 1, H3h
211295_x_at	2.13e-09	3.34e-11	39.7	16.3287	0.369499	CYP2A6	cytochrome P450, family 2, subfamily A, polypeptide 6
228580_at	2.13e-09	3.34e-11	39.7	16.3275	0.409716	HTRA3	HtrA serine peptidase 3
1561044_at	2.13e-09	3.35e-11	39.7	16.3271	0.844434
240340_at	2.13e-09	3.35e-11	-39.7	16.3252	-0.513281	SPATA3	spermatogenesis associated 3
211231_x_at	2.14e-09	3.37e-11	-39.7	16.3183	-0.454711	CYP4A11	cytochrome P450, family 4, subfamily A, polypeptide 11
235323_at	2.15e-09	3.39e-11	39.6	16.3132	0.494488	LOC100499489	uncharacterized LOC100499489
244023_at	2.16e-09	3.4e-11	-39.6	16.3091	-1.394	SYK	spleen tyrosine kinase
35150_at	2.16e-09	3.41e-11	-39.6	16.3071	-0.551824	CD40	CD40 molecule, TNF receptor superfamily member 5
239000_at	2.16e-09	3.42e-11	39.6	16.3049	0.703278	BRD4	bromodomain containing 4
231064_s_at	2.17e-09	3.44e-11	39.6	16.2977	0.428472
240860_at	2.17e-09	3.45e-11	39.6	16.2943	0.46576	LOC100506288	uncharacterized LOC100506288
204401_at	2.19e-09	3.48e-11	39.5	16.2845	0.549187	KCNN4	potassium intermediate/small conductance calcium-activated channel, subfamily N, member 4
204757_s_at	2.2e-09	3.49e-11	39.5	16.2801	1.29776	C2CD2L	C2CD2-like
1559635_at	2.2e-09	3.5e-11	-39.5	16.2777	-0.552831	CASC4	cancer susceptibility candidate 4
220903_at	2.21e-09	3.52e-11	39.5	16.2727	0.657369	GFM1	G elongation factor, mitochondrial 1
238395_at	2.22e-09	3.54e-11	39.5	16.2676	0.73359
219710_at	2.22e-09	3.55e-11	39.4	16.2629	0.519365	SH3TC2	SH3 domain and tetratricopeptide repeats 2
222374_at	2.23e-09	3.57e-11	39.4	16.2575	0.673348	BTRC	beta-transducin repeat containing E3 ubiquitin protein ligase
238498_at	2.24e-09	3.59e-11	-39.4	16.2522	-1.24086
216014_s_at	2.25e-09	3.6e-11	39.4	16.2487	1.18602	ZXDB///ZXDA	zinc finger, X-linked, duplicated B///zinc finger, X-linked, duplicated A
220463_at	2.25e-09	3.61e-11	39.4	16.2458	0.441291	TRPM3	transient receptor potential cation channel, subfamily M, member 3
232581_x_at	2.25e-09	3.61e-11	-39.4	16.2444	-0.377397	HIVEP3	human immunodeficiency virus type I enhancer binding protein 3
1553583_a_at	2.26e-09	3.63e-11	39.3	16.2385	0.770926	THRSP	thyroid hormone responsive
236762_at	2.26e-09	3.64e-11	39.3	16.2362	0.48456	ATP9B	ATPase, class II, type 9B
243263_at	2.26e-09	3.65e-11	39.3	16.2338	1.10225	LINC00482	long intergenic non-protein coding RNA 482
1552311_a_at	2.28e-09	3.69e-11	39.3	16.2229	0.521197	RAX2	retina and anterior neural fold homeobox 2
233004_x_at	2.29e-09	3.69e-11	39.3	16.2209	1.52086
237429_at	2.29e-09	3.7e-11	39.2	16.2179	0.709769
1555569_a_at	2.3e-09	3.73e-11	-39.2	16.21	-0.347044	KCTD7	potassium channel tetramerisation domain containing 7
208008_at	2.31e-09	3.75e-11	39.2	16.2046	0.427775	TBC1D29	TBC1 domain family, member 29
238910_at	2.32e-09	3.76e-11	-39.2	16.2013	-0.445743
216282_x_at	2.36e-09	3.84e-11	39.1	16.1786	0.437128	POLR2C	polymerase (RNA) II (DNA directed) polypeptide C, 33kDa
1564787_at	2.36e-09	3.84e-11	39.1	16.1773	0.483628	LOC643923	uncharacterized LOC643923
221456_at	2.36e-09	3.84e-11	39.1	16.1772	0.486391	TAS2R3	taste receptor, type 2, member 3
217548_at	2.37e-09	3.86e-11	-39.1	16.1726	-0.803308
236111_at	2.38e-09	3.88e-11	39	16.168	0.866164
214411_x_at	2.38e-09	3.88e-11	39	16.1662	0.67187	CTRB2	chymotrypsinogen B2
226205_at	2.38e-09	3.9e-11	-39	16.1614	-0.468408	ANKRD13D	ankyrin repeat domain 13 family, member D
240916_x_at	2.38e-09	3.9e-11	-39	16.1611	-0.491227
204909_at	2.38e-09	3.91e-11	39	16.1603	0.749233	DDX6	DEAD (Asp-Glu-Ala-Asp) box helicase 6
236722_at	2.39e-09	3.92e-11	39	16.1576	1.10646	LOC100129380	uncharacterized LOC100129380
1559754_at	2.39e-09	3.92e-11	39	16.1551	0.369368	LTB	lymphotoxin beta (TNF superfamily, member 3)
233307_x_at	2.41e-09	3.97e-11	38.9	16.1438	1.31248	LOC100505828	uncharacterized LOC100505828
234021_at	2.43e-09	3.99e-11	38.9	16.1366	0.665712	EML2	echinoderm microtubule associated protein like 2
222259_s_at	2.43e-09	4.01e-11	38.9	16.133	0.568026	SPO11	SPO11 meiotic protein covalently bound to DSB
1567166_at	2.43e-09	4.01e-11	38.9	16.1328	0.391598
232643_at	2.43e-09	4.01e-11	-38.9	16.132	-0.512154	POLR2F	polymerase (RNA) II (DNA directed) polypeptide F
1555084_at	2.45e-09	4.05e-11	-38.8	16.12	-0.436958
232787_at	2.49e-09	4.11e-11	-38.8	16.1039	-0.94095	HELZ2	helicase with zinc finger 2, transcriptional coactivator
233104_at	2.5e-09	4.14e-11	38.7	16.0976	0.727534	PABPC1L	poly(A) binding protein, cytoplasmic 1-like
237786_at	2.51e-09	4.16e-11	-38.7	16.093	-0.495479
244381_at	2.52e-09	4.18e-11	-38.7	16.086	-0.558121
232667_at	2.52e-09	4.19e-11	-38.7	16.0852	-1.14773
1564039_at	2.54e-09	4.22e-11	38.7	16.0768	0.460928	ZSCAN23	zinc finger and SCAN domain containing 23
216644_at	2.55e-09	4.25e-11	38.6	16.0694	0.348449
1568796_at	2.55e-09	4.25e-11	-38.6	16.0684	-0.553304	CCDC157	coiled-coil domain containing 157
1569005_at	2.55e-09	4.26e-11	38.6	16.0667	0.638745
216699_s_at	2.55e-09	4.27e-11	38.6	16.0651	0.417365	KLK1	kallikrein 1
1566766_a_at	2.55e-09	4.27e-11	-38.6	16.0641	-1.17257	MACC1	metastasis associated in colon cancer 1
243689_s_at	2.56e-09	4.28e-11	38.6	16.0605	0.652901	FRG1B	FSHD region gene 1 family, member B
1565699_at	2.57e-09	4.31e-11	38.6	16.0539	0.625699	HECTD2	HECT domain containing E3 ubiquitin protein ligase 2
239844_x_at	2.59e-09	4.35e-11	38.5	16.0438	0.384396	C1orf228	chromosome 1 open reading frame 228
237916_at	2.59e-09	4.35e-11	38.5	16.0438	0.545722
1553717_at	2.59e-09	4.36e-11	38.5	16.0414	1.00554	KCTD7	potassium channel tetramerisation domain containing 7
244497_at	2.61e-09	4.39e-11	-38.5	16.0341	-0.530286	LOC100129907	hypothetical LOC100129907
222017_x_at	2.61e-09	4.41e-11	38.5	16.0293	0.497914	LRCH4	leucine-rich repeats and calponin homology (CH) domain containing 4
207353_s_at	2.62e-09	4.42e-11	-38.5	16.0263	-1.12419	HMX1	H6 family homeobox 1
235674_at	2.64e-09	4.47e-11	-38.4	16.0153	-0.614768	KIAA0922	KIAA0922
211221_at	2.68e-09	4.54e-11	38.3	15.9989	0.47806	TADA3	transcriptional adaptor 3
230525_at	2.68e-09	4.54e-11	38.3	15.9977	0.453815
228864_at	2.69e-09	4.56e-11	38.3	15.9933	0.349412	ZNF653	zinc finger protein 653
227901_at	2.73e-09	4.64e-11	-38.2	15.9752	-0.785555	LOC648987	uncharacterized LOC648987
214229_at	2.73e-09	4.65e-11	-38.2	15.9727	-0.45287	DNAH17	dynein, axonemal, heavy chain 17
218266_s_at	2.74e-09	4.65e-11	38.2	15.971	1.28339	NCS1	neuronal calcium sensor 1
1554571_at	2.75e-09	4.68e-11	38.2	15.9649	0.400931	APBB1IP	amyloid beta (A4) precursor protein-binding, family B, member 1 interacting protein
1554086_at	2.75e-09	4.69e-11	-38.2	15.9617	-0.401606	TUBGCP3	tubulin, gamma complex associated protein 3
220922_s_at	2.77e-09	4.73e-11	38.2	15.9524	0.45965	SPANXB2///SPANXA2///SPANXB1///SPANXF1///SPANXC///SPANXA1	SPANX family, member B2///SPANX family, member A2///SPANX family, member B1///SPANX family, member F1///SPANX family, member C///sperm protein associated with the nucleus, X-linked, family member A1
205629_s_at	2.81e-09	4.8e-11	-38.1	15.9385	-0.648095	CRH	corticotropin releasing hormone
1561619_at	2.82e-09	4.82e-11	-38.1	15.9332	-0.571673
240023_at	2.84e-09	4.86e-11	-38	15.9237	-0.44056
91952_at	2.89e-09	4.96e-11	38	15.9018	0.684413	DCAF15	DDB1 and CUL4 associated factor 15
239146_at	2.89e-09	4.96e-11	-37.9	15.9014	-0.475975	CLDND1	claudin domain containing 1
228475_at	2.91e-09	4.99e-11	37.9	15.8955	0.461438	CCDC61	coiled-coil domain containing 61
1559546_s_at	2.93e-09	5.03e-11	37.9	15.8862	0.761331	SNRPN	small nuclear ribonucleoprotein polypeptide N
240849_at	2.93e-09	5.04e-11	-37.9	15.8845	-0.836095
243292_at	2.94e-09	5.07e-11	-37.9	15.8794	-0.439164	FAM132A	family with sequence similarity 132, member A
207366_at	2.94e-09	5.08e-11	37.9	15.8774	0.384756	KCNS1	potassium voltage-gated channel, delayed-rectifier, subfamily S, member 1
226836_at	3e-09	5.18e-11	37.8	15.8551	0.874262	SFT2D1	SFT2 domain containing 1
1560212_a_at	3e-09	5.18e-11	-37.8	15.855	-0.491821
240793_at	3e-09	5.19e-11	-37.8	15.8533	-1.20981	TTN	titin
244686_at	3e-09	5.2e-11	-37.7	15.851	-0.515846	TCOF1	Treacher Collins-Franceschetti syndrome 1
216847_at	3.05e-09	5.28e-11	37.7	15.8336	0.597977
206985_at	3.05e-09	5.29e-11	-37.7	15.8335	-0.665732	HSD17B3	hydroxysteroid (17-beta) dehydrogenase 3
238552_at	3.05e-09	5.3e-11	-37.7	15.831	-1.49367
215265_at	3.07e-09	5.34e-11	-37.6	15.8227	-0.404623	EMX1	empty spiracles homeobox 1
232359_at	3.08e-09	5.37e-11	37.6	15.8164	1.35679	RDH11	retinol dehydrogenase 11 (all-trans/9-cis/11-cis)
206257_at	3.09e-09	5.39e-11	37.6	15.8119	0.910172	CCDC9	coiled-coil domain containing 9
1562733_at	3.11e-09	5.43e-11	-37.6	15.8039	-1.27482	LINC00092	long intergenic non-protein coding RNA 92
222269_at	3.11e-09	5.44e-11	37.6	15.8032	1.44045	APOOL	apolipoprotein O-like
1555078_at	3.12e-09	5.45e-11	37.5	15.7998	0.435323	ZNF843	zinc finger protein 843
1565436_s_at	3.16e-09	5.52e-11	37.5	15.7859	0.628464	KMT2A	lysine (K)-specific methyltransferase 2A
221302_at	3.21e-09	5.64e-11	-37.4	15.7639	-1.22237	KLF15	Kruppel-like factor 15
234733_s_at	3.21e-09	5.64e-11	37.4	15.7629	0.659189	FANCM	Fanconi anemia, complementation group M
237899_at	3.21e-09	5.65e-11	37.4	15.7618	0.406046
237736_at	3.21e-09	5.65e-11	37.4	15.7618	0.411552
206151_x_at	3.21e-09	5.65e-11	37.4	15.7605	0.877566	CELA3B	chymotrypsin-like elastase family, member 3B
227271_at	3.23e-09	5.69e-11	-37.4	15.7546	-0.378834	FGF11	fibroblast growth factor 11
206800_at	3.23e-09	5.7e-11	37.3	15.7511	0.922188	MTHFR	methylenetetrahydrofolate reductase (NAD(P)H)
241057_x_at	3.23e-09	5.7e-11	37.3	15.7509	0.974143
210484_s_at	3.26e-09	5.76e-11	37.3	15.7397	0.751669	LOC254896///TNFRSF10C	uncharacterized LOC254896///tumor necrosis factor receptor superfamily, member 10c, decoy without an intracellular domain
215319_at	3.27e-09	5.79e-11	37.3	15.7351	0.421911	ATP8B3	ATPase, aminophospholipid transporter, class I, type 8B, member 3
1568616_a_at	3.3e-09	5.84e-11	-37.3	15.7264	-0.99768	C11orf96	chromosome 11 open reading frame 96
238105_x_at	3.32e-09	5.88e-11	-37.2	15.718	-0.432981	WNT7B	wingless-type MMTV integration site family, member 7B
237715_at	3.32e-09	5.9e-11	37.2	15.7138	0.40141	AKNA	AT-hook transcription factor
1554503_a_at	3.32e-09	5.91e-11	-37.2	15.7136	-0.454496	OSCAR	osteoclast associated, immunoglobulin-like receptor
1554943_at	3.32e-09	5.91e-11	-37.2	15.713	-0.538108	VIL1	villin 1
231388_at	3.32e-09	5.92e-11	37.2	15.7116	0.583098	ZNF318	zinc finger protein 318
220875_at	3.35e-09	5.96e-11	37.2	15.7033	0.473316
206728_at	3.35e-09	5.98e-11	37.1	15.7004	0.474416	ECE2	endothelin converting enzyme 2
1553721_at	3.35e-09	5.98e-11	37.1	15.6999	0.652659	RNF152	ring finger protein 152
215613_at	3.35e-09	5.99e-11	-37.1	15.6984	-0.585126	ADAM12	ADAM metallopeptidase domain 12
205720_at	3.38e-09	6.05e-11	37.1	15.6881	0.399048	POMC	proopiomelanocortin
216739_at	3.38e-09	6.05e-11	37.1	15.687	0.373337
1555464_at	3.39e-09	6.08e-11	37.1	15.6825	1.18268	IFIH1	interferon induced with helicase C domain 1
226174_at	3.4e-09	6.1e-11	37.1	15.6792	1.44419	USP42	ubiquitin specific peptidase 42
207787_at	3.4e-09	6.1e-11	37.1	15.6779	0.449137	KRT33B	keratin 33B
210954_s_at	3.41e-09	6.13e-11	37	15.6724	0.412913	TSC22D2	TSC22 domain family, member 2
217265_at	3.42e-09	6.15e-11	37	15.6689	0.593068	PLLP	plasmolipin
1560163_at	3.42e-09	6.16e-11	37	15.6686	0.438663
210846_x_at	3.42e-09	6.17e-11	37	15.6665	0.382829	TRIM14	tripartite motif containing 14
242684_at	3.42e-09	6.17e-11	37	15.6662	0.606693	ZNF425	zinc finger protein 425
231286_at	3.43e-09	6.2e-11	37	15.6613	0.558318	C9orf47	chromosome 9 open reading frame 47
222350_at	3.44e-09	6.23e-11	37	15.6562	0.631163
216207_x_at	3.47e-09	6.28e-11	36.9	15.6474	2.11859	LOC652493///IGKV1D-8///IGKV1-5///IGKC	ig kappa chain V-I region HK102-like///immunoglobulin kappa variable 1D-8///immunoglobulin kappa variable 1-5///immunoglobulin kappa constant
240628_at	3.47e-09	6.29e-11	36.9	15.6455	0.549599	LOC100506958	hypothetical LOC100506958
231312_at	3.48e-09	6.31e-11	-36.9	15.6417	-0.388716
224409_s_at	3.49e-09	6.34e-11	36.9	15.6375	0.419897	TSSK6	testis-specific serine kinase 6
1560713_a_at	3.49e-09	6.35e-11	36.9	15.6351	0.419696	ELFN2	extracellular leucine-rich repeat and fibronectin type III domain containing 2
237093_at	3.5e-09	6.38e-11	-36.9	15.6299	-0.523256	PRPF4B	PRP4 pre-mRNA processing factor 4 homolog B (yeast)
236331_at	3.5e-09	6.38e-11	-36.9	15.6294	-0.465989	CDKL2	cyclin-dependent kinase-like 2 (CDC2-related kinase)
1564907_s_at	3.51e-09	6.4e-11	36.9	15.6266	1.06278	SNHG4///MATR3	small nucleolar RNA host gene 4 (non-protein coding)///matrin 3
233475_at	3.51e-09	6.41e-11	-36.9	15.6254	-0.528045
239173_at	3.51e-09	6.42e-11	36.8	15.6234	0.400772	INADL	InaD-like (Drosophila)
1559812_at	3.51e-09	6.42e-11	-36.8	15.6229	-0.45051
237003_at	3.53e-09	6.46e-11	-36.8	15.6169	-0.48317	BEST3	bestrophin 3
238889_at	3.54e-09	6.48e-11	36.8	15.6124	0.85656	AGBL5	ATP/GTP binding protein-like 5
1558140_at	3.55e-09	6.51e-11	-36.8	15.6086	-0.397671	PLXNA1	plexin A1
244713_at	3.55e-09	6.53e-11	-36.8	15.6052	-0.391201
1557621_at	3.56e-09	6.54e-11	36.8	15.6037	0.367416	KCP	kielin/chordin-like protein
238473_at	3.56e-09	6.54e-11	36.8	15.6028	0.48608	LOC100216545	uncharacterized LOC100216545
1562910_at	3.58e-09	6.59e-11	-36.7	15.5948	-0.418742	SH3PXD2B	SH3 and PX domains 2B
235726_at	3.59e-09	6.62e-11	-36.7	15.5906	-0.406973	ZBTB10	zinc finger and BTB domain containing 10
203111_s_at	3.6e-09	6.64e-11	36.7	15.5872	0.51081	PTK2B	protein tyrosine kinase 2 beta
208406_s_at	3.62e-09	6.68e-11	36.7	15.58	0.526385	GRAP2	GRB2-related adaptor protein 2
213847_at	3.63e-09	6.71e-11	-36.7	15.5756	-0.384639	PRPH	peripherin
1556267_at	3.63e-09	6.72e-11	36.7	15.5738	0.849384	MYRFL	myelin regulatory factor-like
208416_s_at	3.7e-09	6.85e-11	-36.6	15.5535	-0.329125	SPTB	spectrin, beta, erythrocytic
205592_at	3.72e-09	6.89e-11	36.5	15.5461	0.77798	SLC4A1	solute carrier family 4, anion exchanger, member 1 (erythrocyte membrane protein band 3, Diego blood group)
211641_x_at	3.72e-09	6.91e-11	-36.5	15.5428	-0.693702	IGHV3-48///IGHV4-31///IGHM///IGHG3///IGHG1///IGHD///IGHA2///IGHA1	immunoglobulin heavy variable 3-48///immunoglobulin heavy variable 4-31///immunoglobulin heavy constant mu///immunoglobulin heavy constant gamma 3 (G3m marker)///immunoglobulin heavy constant gamma 1 (G1m marker)///immunoglobulin heavy constant delta///immunoglobulin heavy constant alpha 2 (A2m marker)///immunoglobulin heavy constant alpha 1
202400_s_at	3.75e-09	6.96e-11	-36.5	15.5353	-0.70618	SRF	serum response factor (c-fos serum response element-binding transcription factor)
231404_at	3.76e-09	6.99e-11	-36.5	15.5316	-0.427236	SPTY2D1-AS1	SPTY2D1 antisense RNA 1
1564467_at	3.76e-09	7e-11	36.5	15.53	0.749948	FAM161A	family with sequence similarity 161, member A
235894_at	3.82e-09	7.12e-11	-36.4	15.5116	-0.790602
221068_at	3.82e-09	7.12e-11	-36.4	15.5105	-0.398321	KANK2	KN motif and ankyrin repeat domains 2
242821_at	3.82e-09	7.14e-11	36.4	15.5088	0.657801	CCDC171	coiled-coil domain containing 171
1563119_at	3.89e-09	7.26e-11	36.3	15.4896	0.426532
235839_at	3.89e-09	7.28e-11	-36.3	15.4869	-0.39273	C22orf34	chromosome 22 open reading frame 34
1560451_at	3.89e-09	7.28e-11	36.3	15.4864	0.878789
236041_at	3.89e-09	7.28e-11	36.3	15.4863	0.664427
240210_at	3.93e-09	7.37e-11	36.3	15.4739	0.61546	ATAD3C	ATPase family, AAA domain containing 3C
231071_at	3.94e-09	7.4e-11	36.3	15.4695	0.587768	YTHDF3-AS1	YTHDF3 antisense RNA 1 (head to head)
236463_at	3.95e-09	7.43e-11	-36.2	15.4642	-0.386074	ADAD2	adenosine deaminase domain containing 2
229920_at	3.99e-09	7.51e-11	-36.2	15.4531	-0.607684
1562853_x_at	4.01e-09	7.55e-11	-36.2	15.4482	-0.495863
237709_at	4.04e-09	7.61e-11	36.1	15.4386	0.351913	LOC100507513	uncharacterized LOC100507513
211822_s_at	4.05e-09	7.64e-11	-36.1	15.4346	-0.429439	NLRP1	NLR family, pyrin domain containing 1
241522_at	4.05e-09	7.64e-11	-36.1	15.434	-0.468277
243708_at	4.05e-09	7.67e-11	36.1	15.4308	0.468642	TMEM132E	transmembrane protein 132E
229263_at	4.05e-09	7.67e-11	-36.1	15.4301	-0.681339	IL17RD	interleukin 17 receptor D
240097_at	4.1e-09	7.77e-11	36	15.4159	0.37223
232666_at	4.14e-09	7.85e-11	-36	15.4048	-0.521459	OAS3	2'-5'-oligoadenylate synthetase 3, 100kDa
207296_at	4.14e-09	7.86e-11	-36	15.4045	-0.65246	ZNF343	zinc finger protein 343
232555_at	4.16e-09	7.91e-11	-36	15.3965	-0.60102	CREB5	cAMP responsive element binding protein 5
207244_x_at	4.18e-09	7.95e-11	-36	15.3916	-0.511031	CYP2A6	cytochrome P450, family 2, subfamily A, polypeptide 6
210025_s_at	4.19e-09	7.97e-11	35.9	15.3886	0.721861	CARD10	caspase recruitment domain family, member 10
1564077_at	4.2e-09	8e-11	-35.9	15.3847	-0.802272
1566549_at	4.2e-09	8e-11	35.9	15.3844	0.379868
228862_at	4.21e-09	8.04e-11	-35.9	15.3797	-0.381366	TSNARE1	t-SNARE domain containing 1
1556183_at	4.23e-09	8.09e-11	35.9	15.3727	0.347252	ANKRD36BP2	ankyrin repeat domain 36B pseudogene 2
1552953_a_at	4.24e-09	8.11e-11	-35.9	15.3703	-0.397124	NEUROD2	neuronal differentiation 2
236626_at	4.24e-09	8.13e-11	-35.9	15.3679	-0.721068	ALG1	ALG1, chitobiosyldiphosphodolichol beta-mannosyltransferase
234664_at	4.25e-09	8.15e-11	35.9	15.3652	0.372465	LOC100133161///LOC100132062///LOC731275	uncharacterized LOC100133161///uncharacterized LOC100132062///uncharacterized LOC731275
215736_at	4.25e-09	8.15e-11	35.9	15.3652	0.358202
1565832_at	4.27e-09	8.2e-11	-35.8	15.358	-0.40001	KANK1	KN motif and ankyrin repeat domains 1
1564985_a_at	4.29e-09	8.25e-11	-35.8	15.3517	-0.492728	SLC8A1	solute carrier family 8 (sodium/calcium exchanger), member 1
223788_at	4.31e-09	8.29e-11	35.8	15.3457	1.26668
220340_at	4.35e-09	8.38e-11	35.7	15.335	0.715528	GREB1L	growth regulation by estrogen in breast cancer-like
236595_at	4.37e-09	8.42e-11	-35.7	15.3296	-0.517833	LOC100507307	uncharacterized LOC100507307
235087_at	4.38e-09	8.46e-11	-35.7	15.3248	-0.620894	UNKL	unkempt homolog (Drosophila)-like
240771_at	4.41e-09	8.52e-11	-35.7	15.3161	-0.851279	C1orf101	chromosome 1 open reading frame 101
1554126_at	4.42e-09	8.54e-11	-35.7	15.3136	-1.44558	MSRB3	methionine sulfoxide reductase B3
207476_at	4.46e-09	8.62e-11	35.6	15.3036	0.54665	LOC100507630	uncharacterized LOC100507630
230851_x_at	4.47e-09	8.66e-11	35.6	15.2988	0.331917	C16orf13	chromosome 16 open reading frame 13
239013_at	4.47e-09	8.67e-11	35.6	15.2981	0.362367	SEC22C	SEC22 vesicle trafficking protein homolog C (S. cerevisiae)
219907_at	4.47e-09	8.68e-11	35.6	15.296	0.571187	FRS3	fibroblast growth factor receptor substrate 3
205784_x_at	4.47e-09	8.69e-11	35.6	15.2955	0.62051	ARVCF	armadillo repeat gene deleted in velocardiofacial syndrome
205686_s_at	4.49e-09	8.72e-11	35.6	15.2914	0.411833	CD86	CD86 molecule
209745_at	4.51e-09	8.79e-11	35.5	15.2833	0.904613	COQ7	coenzyme Q7 homolog, ubiquinone (yeast)
219085_s_at	4.55e-09	8.87e-11	35.5	15.2728	0.386676	GEMIN7	gem (nuclear organelle) associated protein 7
241398_at	4.56e-09	8.89e-11	-35.5	15.2701	-0.500727
206327_s_at	4.58e-09	8.93e-11	35.5	15.2657	0.467021	CDH15	cadherin 15, type 1, M-cadherin (myotubule)
240620_at	4.59e-09	8.96e-11	35.5	15.262	0.489623
205708_s_at	4.59e-09	8.97e-11	-35.5	15.2604	-0.549298	TRPM2	transient receptor potential cation channel, subfamily M, member 2
1569536_at	4.62e-09	9.04e-11	35.4	15.2528	0.698093	FLVCR2	feline leukemia virus subgroup C cellular receptor family, member 2
1558584_at	4.62e-09	9.05e-11	35.4	15.2515	0.548583	UBL4B	ubiquitin-like 4B
212617_at	4.63e-09	9.07e-11	35.4	15.2489	0.815059	ZNF609	zinc finger protein 609
222050_at	4.63e-09	9.09e-11	-35.4	15.2461	-0.393828
243223_at	4.63e-09	9.1e-11	-35.4	15.2453	-0.358227
234003_at	4.63e-09	9.1e-11	-35.4	15.2446	-0.43864	ENOX2	ecto-NOX disulfide-thiol exchanger 2
1562675_at	4.63e-09	9.12e-11	-35.4	15.243	-1.38757
202835_at	4.67e-09	9.2e-11	35.4	15.2335	0.679696	TXNL4A	thioredoxin-like 4A
1565714_at	4.7e-09	9.26e-11	35.3	15.2266	0.380878
1552854_a_at	4.72e-09	9.32e-11	-35.3	15.2197	-0.513274	VWA5B1	von Willebrand factor A domain containing 5B1
229037_at	4.73e-09	9.33e-11	35.3	15.2177	1.07746	TRIM69	tripartite motif containing 69
237688_at	4.73e-09	9.36e-11	35.3	15.2149	0.724698
1553840_a_at	4.76e-09	9.42e-11	35.3	15.2079	0.614588	CCDC149	coiled-coil domain containing 149
234667_at	4.77e-09	9.44e-11	35.2	15.2048	0.530109
233997_at	4.77e-09	9.46e-11	-35.2	15.203	-0.343731	LOC100287166	uncharacterized LOC100287166
1555952_at	4.78e-09	9.49e-11	-35.2	15.1994	-0.363626	SLC19A1	solute carrier family 19 (folate transporter), member 1
214158_s_at	4.78e-09	9.5e-11	35.2	15.1982	0.425496	PRDM10	PR domain containing 10
1554059_at	4.81e-09	9.56e-11	-35.2	15.1916	-0.338141	SETMAR	SET domain and mariner transposase fusion gene
244707_at	4.81e-09	9.58e-11	-35.2	15.1898	-0.650646
220965_s_at	4.81e-09	9.58e-11	35.2	15.1895	0.566232	RSPH6A	radial spoke head 6 homolog A (Chlamydomonas)
231636_s_at	4.81e-09	9.58e-11	35.2	15.1892	0.581758
1557669_at	4.85e-09	9.67e-11	35.2	15.1792	0.458515	LOC100132005	uncharacterized LOC100132005
214187_x_at	4.85e-09	9.68e-11	35.2	15.1783	0.304973	CTDSPL	CTD (carboxy-terminal domain, RNA polymerase II, polypeptide A) small phosphatase-like
221075_s_at	4.86e-09	9.72e-11	35.1	15.1735	0.372709	NCR2	natural cytotoxicity triggering receptor 2
223715_at	4.86e-09	9.72e-11	35.1	15.1731	0.413341	BRSK2	BR serine/threonine kinase 2
243694_at	4.93e-09	9.88e-11	35.1	15.1555	0.465011
238259_at	4.93e-09	9.89e-11	35.1	15.1552	0.731198	ADSSL1	adenylosuccinate synthase like 1
242902_at	4.93e-09	9.89e-11	35.1	15.1551	0.576234	CYMP	chymosin pseudogene
223052_x_at	4.95e-09	9.95e-11	-35	15.1486	-0.356942	SSU72	SSU72 RNA polymerase II CTD phosphatase homolog (S. cerevisiae)
208461_at	4.98e-09	1e-10	-35	15.1415	-0.362347	HIC1	hypermethylated in cancer 1
231415_at	5e-09	1.01e-10	-35	15.1371	-0.40536	WBSCR22	Williams Beuren syndrome chromosome region 22
1555196_at	5e-09	1.01e-10	35	15.1359	0.38037	LINC00421	long intergenic non-protein coding RNA 421
231561_s_at	5.02e-09	1.01e-10	35	15.1295	0.534203	APOC2	apolipoprotein C-II
1560817_at	5.07e-09	1.02e-10	-34.9	15.1174	-0.484667	LOC100287627	similar to hCG1997308
1562664_at	5.11e-09	1.03e-10	-34.9	15.1096	-0.434978	LOC286009	uncharacterized LOC286009
203861_s_at	5.12e-09	1.03e-10	34.9	15.1064	0.369618	ACTN2	actinin, alpha 2
233370_at	5.13e-09	1.04e-10	-34.9	15.1023	-0.517615
1563827_at	5.13e-09	1.04e-10	34.9	15.1006	0.770164	LOC158434	uncharacterized LOC158434
1565905_at	5.16e-09	1.05e-10	34.8	15.0933	0.358934	FLJ46026	FLJ46026 protein
1561353_at	5.23e-09	1.06e-10	-34.8	15.0797	-0.460026
1561221_x_at	5.23e-09	1.06e-10	34.8	15.0773	0.349792	LOC728099	uncharacterized LOC728099
206207_at	5.27e-09	1.07e-10	34.7	15.0689	0.390351	CLC	Charcot-Leyden crystal galectin
242946_at	5.28e-09	1.07e-10	-34.7	15.065	-0.481738
242117_at	5.28e-09	1.08e-10	34.7	15.064	0.524594
235537_at	5.28e-09	1.08e-10	-34.7	15.0632	-0.527872	OCIAD1	OCIA domain containing 1
1569790_at	5.28e-09	1.08e-10	34.7	15.0618	0.606429	LOC100288590	cutaneous T-cell lymphoma-associated antigen 1 pseudogene
1569374_at	5.32e-09	1.09e-10	-34.7	15.053	-0.348201	C3orf62	chromosome 3 open reading frame 62
224223_s_at	5.38e-09	1.1e-10	34.6	15.0408	0.591327	PDE11A	phosphodiesterase 11A
236123_at	5.38e-09	1.1e-10	-34.6	15.0401	-0.489938	ST7L	suppression of tumorigenicity 7 like
1554332_a_at	5.43e-09	1.11e-10	34.6	15.0274	0.477564	LOC100127888	uncharacterized LOC100127888
1556340_at	5.45e-09	1.12e-10	-34.6	15.0223	-0.649527	MAPK12	mitogen-activated protein kinase 12
228319_at	5.5e-09	1.13e-10	-34.5	15.0106	-0.403061	FAM84A	family with sequence similarity 84, member A
237952_at	5.5e-09	1.13e-10	-34.5	15.0104	-0.412917
1563489_at	5.52e-09	1.13e-10	34.5	15.0064	0.628555	LOC285638	uncharacterized LOC285638
206585_at	5.62e-09	1.16e-10	34.4	14.9857	0.663949	MKRN3	makorin ring finger protein 3
1560001_at	5.63e-09	1.16e-10	-34.4	14.9839	-0.36248	LOC100131581	uncharacterized LOC100131581
241611_s_at	5.67e-09	1.17e-10	-34.4	14.9749	-0.67379	FNDC3A	fibronectin type III domain containing 3A
234355_s_at	5.67e-09	1.17e-10	34.4	14.9729	0.377051	PTCHD2	patched domain containing 2
214294_at	5.71e-09	1.18e-10	-34.4	14.9643	-0.630557	KIAA0485	uncharacterized LOC57235
223678_s_at	5.71e-09	1.18e-10	34.4	14.9636	0.634198	SFTPA2///SFTPA1	surfactant protein A2///surfactant protein A1
228802_at	5.72e-09	1.18e-10	-34.4	14.9619	-0.395633	RBPMS2	RNA binding protein with multiple splicing 2
229104_s_at	5.74e-09	1.19e-10	34.3	14.9561	0.540765	GPR39	G protein-coupled receptor 39
229443_at	5.77e-09	1.19e-10	-34.3	14.9506	-0.450241	MNF1	mitochondrial nucleoid factor 1
1569517_at	5.78e-09	1.2e-10	34.3	14.9465	0.346212	LOC646482	uncharacterized LOC646482
1569234_at	5.8e-09	1.2e-10	34.3	14.9411	0.393127
229698_at	5.8e-09	1.2e-10	-34.3	14.9406	-0.713042
228279_s_at	5.81e-09	1.21e-10	-34.3	14.9385	-0.504119
237543_at	5.81e-09	1.21e-10	34.3	14.9369	0.469373	LOC100506286	uncharacterized LOC100506286
220010_at	5.81e-09	1.21e-10	-34.3	14.9358	-0.328469	KCNE1L	KCNE1-like
238383_at	5.81e-09	1.21e-10	34.3	14.9347	0.440558	C6orf58	chromosome 6 open reading frame 58
1554170_a_at	5.84e-09	1.22e-10	34.2	14.9296	1.10343	MBLAC1	metallo-beta-lactamase domain containing 1
1566726_at	5.94e-09	1.24e-10	34.2	14.9096	0.485655
1566484_at	5.97e-09	1.25e-10	34.1	14.9034	0.397662
1556165_at	6e-09	1.25e-10	34.1	14.8976	0.333431	LOC100505727	uncharacterized LOC100505727
226367_at	6.03e-09	1.26e-10	-34.1	14.8912	-0.664244	KDM5A	lysine (K)-specific demethylase 5A
235485_at	6.04e-09	1.26e-10	34.1	14.8881	0.35447	WDR44	WD repeat domain 44
1564131_a_at	6.13e-09	1.28e-10	34	14.871	0.80995	BSN-AS2	BSN antisense RNA 2 (head to head)
230699_at	6.16e-09	1.29e-10	-34	14.8638	-0.353357	PGLS	6-phosphogluconolactonase
217154_s_at	6.17e-09	1.29e-10	34	14.8623	0.805291	EDN3	endothelin 3
1568690_a_at	6.19e-09	1.3e-10	34	14.8579	0.413212	LOC728853	WD repeat domain 87 pseudogene
1561526_at	6.2e-09	1.31e-10	34	14.8535	0.556788
227216_at	6.2e-09	1.31e-10	34	14.8531	0.562633	RLTPR	RGD motif, leucine rich repeats, tropomodulin domain and proline-rich containing
221244_s_at	6.23e-09	1.31e-10	-33.9	14.8474	-0.442922	PDPK1	3-phosphoinositide dependent protein kinase-1
216925_s_at	6.24e-09	1.32e-10	33.9	14.8453	0.345046	TAL1	T-cell acute lymphocytic leukemia 1
236992_at	6.38e-09	1.35e-10	33.8	14.82	1.03745
224421_x_at	6.38e-09	1.35e-10	-33.8	14.8186	-0.413983	PMCHL1	pro-melanin-concentrating hormone-like 1, pseudogene
227469_at	6.38e-09	1.35e-10	33.8	14.8184	0.40222	PTEN	phosphatase and tensin homolog
1553813_s_at	6.38e-09	1.35e-10	33.8	14.8171	0.359695	TLE6	transducin-like enhancer of split 6 (E(sp1) homolog, Drosophila)
230960_at	6.48e-09	1.37e-10	33.8	14.7988	1.69114	IGDCC3	immunoglobulin superfamily, DCC subclass, member 3
207976_at	6.56e-09	1.39e-10	-33.7	14.7849	-0.423996	KLHL18	kelch-like family member 18
220185_at	6.57e-09	1.39e-10	33.7	14.7818	0.350906	SPTBN4	spectrin, beta, non-erythrocytic 4
219576_at	6.58e-09	1.4e-10	33.7	14.779	0.426038	MAP7D3	MAP7 domain containing 3
231942_at	6.61e-09	1.4e-10	-33.7	14.7743	-0.348791
215005_at	6.64e-09	1.42e-10	-33.6	14.7654	-0.431314	NECAB2	N-terminal EF-hand calcium binding protein 2
236455_at	6.64e-09	1.42e-10	33.6	14.765	0.705393
1554430_at	6.64e-09	1.42e-10	33.6	14.7635	0.342757	SMIM11	small integral membrane protein 11
1554675_a_at	6.64e-09	1.42e-10	33.6	14.7634	0.647445	SYCE1	synaptonemal complex central element protein 1
231816_s_at	6.64e-09	1.42e-10	-33.6	14.763	-0.590805	UBE2Q1	ubiquitin-conjugating enzyme E2Q family member 1
216473_x_at	6.64e-09	1.42e-10	33.6	14.7628	0.361168	DUX4L2///DUX4L3///DUX4L5///DUX4L6///DUX4L7///DUX4L4///DUX4	double homeobox 4 like 2///double homeobox 4 like 3///double homeobox 4 like 5///double homeobox 4 like 6///double homeobox 4 like 7///double homeobox 4 like 4///double homeobox 4
216910_at	6.64e-09	1.42e-10	33.6	14.7602	0.435342	XPNPEP2	X-prolyl aminopeptidase (aminopeptidase P) 2, membrane-bound
216557_x_at	6.64e-09	1.42e-10	-33.6	14.76	-0.589761	IGHV3-48///IGHV4-31///IGHM///IGHG3///IGHG1///IGHD///IGHA1	immunoglobulin heavy variable 3-48///immunoglobulin heavy variable 4-31///immunoglobulin heavy constant mu///immunoglobulin heavy constant gamma 3 (G3m marker)///immunoglobulin heavy constant gamma 1 (G1m marker)///immunoglobulin heavy constant delta///immunoglobulin heavy constant alpha 1
215205_x_at	6.64e-09	1.42e-10	33.6	14.7598	0.486228	NCOR2	nuclear receptor corepressor 2
1555614_at	6.67e-09	1.43e-10	33.6	14.7551	0.48643	SUGT1P1	suppressor of G2 allele of SKP1 (S. cerevisiae) pseudogene 1
230457_at	6.69e-09	1.44e-10	33.6	14.7498	0.43735	TMEM242	transmembrane protein 242
243842_at	6.71e-09	1.44e-10	33.6	14.7457	0.387353
208104_s_at	6.8e-09	1.46e-10	33.5	14.7308	0.491261	TSC22D4	TSC22 domain family, member 4
1561484_at	6.94e-09	1.49e-10	33.4	14.7074	0.409247
1559755_at	6.94e-09	1.49e-10	-33.4	14.7072	-0.353645	C21orf49	chromosome 21 open reading frame 49
213250_at	6.96e-09	1.5e-10	33.4	14.7028	0.385954	CCDC85B	coiled-coil domain containing 85B
214523_at	7.03e-09	1.51e-10	33.4	14.6915	0.401263	CEBPE	CCAAT/enhancer binding protein (C/EBP), epsilon
230539_at	7.04e-09	1.52e-10	33.4	14.6885	0.388018	FAM182A	family with sequence similarity 182, member A
1552566_at	7.06e-09	1.52e-10	33.4	14.685	0.39621	BTBD16	BTB (POZ) domain containing 16
229102_at	7.13e-09	1.54e-10	-33.3	14.6731	-0.343844	HTATIP2	HIV-1 Tat interactive protein 2, 30kDa
239657_x_at	7.14e-09	1.54e-10	33.3	14.6705	0.525845	FOXO6	forkhead box O6
1561270_at	7.14e-09	1.55e-10	33.3	14.6692	0.472565
1556665_at	7.15e-09	1.55e-10	33.3	14.6664	0.866288	TTC6	tetratricopeptide repeat domain 6
219881_s_at	7.24e-09	1.57e-10	-33.2	14.6522	-0.621116	LOC100507619	uncharacterized LOC100507619
232834_at	7.25e-09	1.57e-10	33.2	14.6506	1.08911
237691_x_at	7.25e-09	1.57e-10	33.2	14.6495	0.871829	ENO3	enolase 3 (beta, muscle)
1556250_at	7.25e-09	1.58e-10	33.2	14.6473	0.43359
217339_x_at	7.25e-09	1.58e-10	-33.2	14.6467	-0.397043	CTAG1A///CTAG1B	cancer/testis antigen 1A///cancer/testis antigen 1B
1563339_at	7.3e-09	1.59e-10	33.2	14.6394	0.576312
224156_x_at	7.32e-09	1.6e-10	-33.2	14.6333	-0.377182	IL17RB	interleukin 17 receptor B
1562657_a_at	7.32e-09	1.6e-10	33.2	14.6332	0.711423	C10orf90	chromosome 10 open reading frame 90
1553663_a_at	7.32e-09	1.6e-10	33.2	14.6331	0.351873	NPB	neuropeptide B
1563485_at	7.34e-09	1.6e-10	33.2	14.629	0.358349
216374_at	7.34e-09	1.61e-10	-33.2	14.6279	-0.820871
237887_at	7.35e-09	1.61e-10	33.2	14.6246	0.666273
232819_s_at	7.35e-09	1.61e-10	33.1	14.6233	0.480018	LTBR	lymphotoxin beta receptor (TNFR superfamily, member 3)
243111_at	7.35e-09	1.61e-10	33.1	14.6231	0.515646	ENTPD1	ectonucleoside triphosphate diphosphohydrolase 1
237726_at	7.35e-09	1.61e-10	33.1	14.6229	0.959099
240393_at	7.39e-09	1.62e-10	-33.1	14.6167	-0.415351
232684_at	7.39e-09	1.62e-10	33.1	14.6153	0.540219	ZNF503-AS1	ZNF503 antisense RNA 1
1560782_at	7.39e-09	1.63e-10	33.1	14.6146	0.458332
231858_x_at	7.46e-09	1.64e-10	33.1	14.6038	1.482	AP5B1	adaptor-related protein complex 5, beta 1 subunit
223848_at	7.55e-09	1.66e-10	-33	14.5893	-0.438991	LOC100129198	PRO2866
207800_at	7.6e-09	1.68e-10	33	14.5808	0.58633	AKAP5	A kinase (PRKA) anchor protein 5
215063_x_at	7.64e-09	1.69e-10	33	14.5753	0.758826	LRRC40	leucine rich repeat containing 40
217533_x_at	7.66e-09	1.69e-10	-33	14.5706	-0.373632
234494_x_at	7.69e-09	1.7e-10	-32.9	14.5664	-0.818808
214010_s_at	7.72e-09	1.71e-10	-32.9	14.5611	-0.599565	ATP9B	ATPase, class II, type 9B
231589_at	7.72e-09	1.71e-10	32.9	14.5599	0.55023	LOC100132460	hypothetical protein LOC100132460
229040_at	7.78e-09	1.73e-10	-32.9	14.5501	-0.546116	ITGB2-AS1	ITGB2 antisense RNA 1
221226_s_at	7.79e-09	1.73e-10	32.9	14.5486	0.359593	ASIC4	acid-sensing (proton-gated) ion channel family member 4
222096_x_at	7.8e-09	1.73e-10	-32.9	14.5454	-0.347568	LOC100507284	uncharacterized LOC100507284
1557232_at	7.82e-09	1.74e-10	32.9	14.5419	1.37949
210200_at	7.82e-09	1.74e-10	-32.9	14.5412	-0.728492	WWP2	WW domain containing E3 ubiquitin protein ligase 2
233984_at	7.82e-09	1.74e-10	32.9	14.5408	0.480115
41387_r_at	7.82e-09	1.74e-10	32.9	14.5394	1.2004	KDM6B	lysine (K)-specific demethylase 6B
214135_at	7.85e-09	1.75e-10	32.8	14.5348	0.346472	CLDN18	claudin 18
219018_s_at	7.85e-09	1.75e-10	-32.8	14.5335	-1.32489	CCDC85C	coiled-coil domain containing 85C
230046_at	7.86e-09	1.76e-10	32.8	14.5308	0.665383	SPRED3	sprouty-related, EVH1 domain containing 3
1563589_at	7.86e-09	1.76e-10	32.8	14.5302	0.566556	LOC340184	uncharacterized LOC340184
215748_at	7.87e-09	1.76e-10	-32.8	14.5271	-0.491879	KLHL35	kelch-like family member 35
1562495_at	7.87e-09	1.76e-10	32.8	14.527	0.389447	ANKFY1	ankyrin repeat and FYVE domain containing 1
1561029_at	7.89e-09	1.77e-10	32.8	14.5222	0.528652
207665_at	7.89e-09	1.77e-10	32.8	14.5222	0.361462	ADAM21P1///ADAM21	ADAM metallopeptidase domain 21 pseudogene 1///ADAM metallopeptidase domain 21
206296_x_at	7.91e-09	1.78e-10	-32.8	14.5186	-0.365215	MAP4K1	mitogen-activated protein kinase kinase kinase kinase 1
214082_at	7.91e-09	1.78e-10	32.8	14.5182	0.506644	CA5B	carbonic anhydrase VB, mitochondrial
1570243_at	7.91e-09	1.78e-10	32.8	14.5174	0.705809
213947_s_at	7.92e-09	1.78e-10	32.8	14.5148	2.4673	NUP210	nucleoporin 210kDa
241842_x_at	7.92e-09	1.78e-10	-32.8	14.5145	-0.383852	C19orf45	chromosome 19 open reading frame 45
204184_s_at	7.95e-09	1.79e-10	32.8	14.5094	0.357181	ADRBK2	adrenergic, beta, receptor kinase 2
219693_at	7.96e-09	1.8e-10	-32.7	14.5068	-1.21868	AGPAT4	1-acylglycerol-3-phosphate O-acyltransferase 4
215003_at	7.96e-09	1.8e-10	32.7	14.5062	0.358223	DGCR9	DiGeorge syndrome critical region gene 9
210497_x_at	7.96e-09	1.8e-10	-32.7	14.5057	-0.341376	SSX2B///SSX2	synovial sarcoma, X breakpoint 2B///synovial sarcoma, X breakpoint 2
231888_at	7.97e-09	1.8e-10	32.7	14.5029	0.696572
221026_s_at	7.97e-09	1.8e-10	32.7	14.5027	0.388419	SCRT1	scratch homolog 1, zinc finger protein (Drosophila)
232457_at	7.97e-09	1.8e-10	32.7	14.5012	0.46396	LIMCH1	LIM and calponin homology domains 1
236507_at	7.97e-09	1.81e-10	-32.7	14.4997	-0.344965	ZDHHC3	zinc finger, DHHC-type containing 3
205853_at	7.97e-09	1.81e-10	-32.7	14.4993	-0.54651	ZBTB7B	zinc finger and BTB domain containing 7B
229722_at	7.98e-09	1.81e-10	32.7	14.4976	0.457651	LOC100270804	uncharacterized LOC100270804
205710_at	7.98e-09	1.81e-10	32.7	14.4961	0.595726	LRP2	low density lipoprotein receptor-related protein 2
1558573_at	7.98e-09	1.81e-10	32.7	14.4951	0.376713	MCTS1	malignant T cell amplified sequence 1
221259_s_at	8e-09	1.82e-10	32.7	14.4917	0.997846	TEX11	testis expressed 11
218406_x_at	8.05e-09	1.83e-10	32.7	14.4837	0.373157	NENF	neudesin neurotrophic factor
202327_s_at	8.07e-09	1.84e-10	32.6	14.4797	0.406811	PKD1	polycystic kidney disease 1 (autosomal dominant)
243205_at	8.07e-09	1.84e-10	32.6	14.4796	0.371515
1556195_a_at	8.15e-09	1.86e-10	32.6	14.4674	0.435746
235437_at	8.15e-09	1.86e-10	32.6	14.4668	0.807938
1554958_at	8.17e-09	1.87e-10	32.6	14.4642	0.297309	ZNF641	zinc finger protein 641
239555_at	8.22e-09	1.88e-10	-32.6	14.4556	-0.38935
220024_s_at	8.26e-09	1.89e-10	-32.5	14.4502	-0.354114	PRX	periaxin
1563431_x_at	8.26e-09	1.89e-10	-32.5	14.4488	-0.519492	CALM3	calmodulin 3 (phosphorylase kinase, delta)
233960_s_at	8.28e-09	1.9e-10	32.5	14.4454	0.332345	LOC115110	uncharacterized LOC115110
234636_at	8.34e-09	1.91e-10	32.5	14.4368	0.454899
233135_at	8.4e-09	1.93e-10	-32.5	14.4286	-0.414796	LOC100506527	uncharacterized LOC100506527
232965_at	8.44e-09	1.94e-10	32.5	14.4218	0.52301	LOC400684	uncharacterized LOC400684
203995_at	8.44e-09	1.94e-10	-32.4	14.4205	-0.352237	C21orf2	chromosome 21 open reading frame 2
221936_x_at	8.44e-09	1.94e-10	32.4	14.4204	0.300662	MRPL41	mitochondrial ribosomal protein L41
233458_at	8.47e-09	1.95e-10	32.4	14.4158	0.425166	POLR3E	polymerase (RNA) III (DNA directed) polypeptide E (80kD)
1558517_s_at	8.48e-09	1.96e-10	-32.4	14.4134	-1.90695	LRRC8C	leucine rich repeat containing 8 family, member C
241998_at	8.48e-09	1.96e-10	32.4	14.4133	0.56737	C2orf80	chromosome 2 open reading frame 80
232015_at	8.5e-09	1.96e-10	32.4	14.4095	0.780244	GAREML	GRB2 associated, regulator of MAPK1-like
204938_s_at	8.51e-09	1.97e-10	-32.4	14.4067	-0.477747	PLN	phospholamban
231325_at	8.52e-09	1.97e-10	-32.4	14.4052	-0.587776	UNC5D	unc-5 homolog D (C. elegans)
233885_at	8.52e-09	1.97e-10	32.4	14.4035	0.373709	ARHGAP33	Rho GTPase activating protein 33
220989_s_at	8.53e-09	1.98e-10	32.4	14.4017	0.880353	AMN	amnion associated transmembrane protein
219498_s_at	8.56e-09	1.99e-10	32.4	14.3967	0.40921	BCL11A	B-cell CLL/lymphoma 11A (zinc finger protein)
242726_at	8.66e-09	2.01e-10	32.3	14.384	1.00748
240912_x_at	8.69e-09	2.02e-10	32.3	14.3791	0.407893	LINC00277	long intergenic non-protein coding RNA 277
240505_at	8.7e-09	2.02e-10	32.3	14.3765	0.764345
216065_at	8.74e-09	2.04e-10	32.3	14.3701	0.302828
215242_at	8.74e-09	2.04e-10	32.3	14.3699	1.17312	PIGC	phosphatidylinositol glycan anchor biosynthesis, class C
1555215_a_at	8.74e-09	2.04e-10	-32.3	14.3692	-0.331506	HRH3	histamine receptor H3
234508_at	8.74e-09	2.04e-10	32.3	14.3692	0.540402
232470_at	8.76e-09	2.04e-10	32.3	14.3657	1.56628	SIK1	salt-inducible kinase 1
203010_at	8.79e-09	2.05e-10	32.2	14.3609	1.36222	STAT5A	signal transducer and activator of transcription 5A
1563369_at	8.86e-09	2.07e-10	-32.2	14.3513	-0.324047	LINC00173	long intergenic non-protein coding RNA 173
212735_at	8.86e-09	2.07e-10	-32.2	14.3502	-0.323531	KIAA0226	KIAA0226
213542_at	8.86e-09	2.07e-10	32.2	14.3492	1.95541	ZNF710	zinc finger protein 710
205106_at	8.87e-09	2.08e-10	-32.2	14.3472	-0.570569	CMC4///MTCP1	C-x(9)-C motif containing 4 homolog (S. cerevisiae)///mature T-cell proliferation 1
215935_at	8.88e-09	2.08e-10	32.2	14.346	0.565021	SPATA31A5///SPATA31A3///SPATA31A1///SPATA31A4///SPATA31A2///SPATA31A6///SPATA31A7	SPATA31 subfamily A, member 5///SPATA31 subfamily A, member 3///SPATA31 subfamily A, member 1///SPATA31 subfamily A, member 4///SPATA31 subfamily A, member 2///SPATA31 subfamily A, member 6///SPATA31 subfamily A, member 7
206196_s_at	8.88e-09	2.08e-10	32.2	14.3441	0.434164	RUNDC3A	RUN domain containing 3A
240321_at	8.89e-09	2.09e-10	32.2	14.342	0.437973
1569086_at	8.9e-09	2.09e-10	32.2	14.3403	0.43811	EML2	echinoderm microtubule associated protein like 2
242816_at	8.9e-09	2.09e-10	-32.2	14.3391	-0.552407	GNAS	GNAS complex locus
234214_at	8.92e-09	2.1e-10	32.2	14.3363	0.323291
243535_at	8.92e-09	2.1e-10	32.2	14.3358	0.665606
1567686_at	8.99e-09	2.12e-10	32.1	14.326	0.342523	CECR9	cat eye syndrome chromosome region, candidate 9 (non-protein coding)
1563655_at	9.07e-09	2.14e-10	-32.1	14.3159	-0.338469	TNNT2	troponin T type 2 (cardiac)
1560942_at	9.07e-09	2.14e-10	32.1	14.3152	0.331911	PGD	phosphogluconate dehydrogenase
236143_at	9.15e-09	2.16e-10	32.1	14.3046	0.992185
1555603_at	9.16e-09	2.17e-10	32	14.3022	0.889277	BAGE	B melanoma antigen
1563341_at	9.24e-09	2.19e-10	32	14.2924	0.585555
211056_s_at	9.26e-09	2.19e-10	-32	14.2885	-1.82098	SRD5A1	steroid-5-alpha-reductase, alpha polypeptide 1 (3-oxo-5 alpha-steroid delta 4-dehydrogenase alpha 1)
228626_at	9.29e-09	2.2e-10	-32	14.2845	-0.431011
1553968_a_at	9.39e-09	2.23e-10	31.9	14.2713	0.526582	ADAT3	adenosine deaminase, tRNA-specific 3
1564295_at	9.46e-09	2.25e-10	31.9	14.2632	0.841277	FLJ25917	uncharacterized LOC401585
204134_at	9.47e-09	2.25e-10	-31.9	14.2607	-0.396062	PDE2A	phosphodiesterase 2A, cGMP-stimulated
207897_at	9.47e-09	2.25e-10	31.9	14.26	0.409057	CRHR2	corticotropin releasing hormone receptor 2
1560743_a_at	9.52e-09	2.26e-10	31.9	14.254	0.688158
239584_at	9.53e-09	2.27e-10	-31.9	14.2518	-0.352737
243919_at	9.54e-09	2.27e-10	-31.9	14.2497	-0.309428
217169_at	9.56e-09	2.28e-10	31.9	14.2461	0.431021	IGHM///IGHG1///IGHA1	immunoglobulin heavy constant mu///immunoglobulin heavy constant gamma 1 (G1m marker)///immunoglobulin heavy constant alpha 1
229925_at	9.69e-09	2.31e-10	-31.8	14.231	-0.658275	SLC6A17	solute carrier family 6, member 17
235943_at	9.7e-09	2.32e-10	-31.8	14.2292	-0.391712
216993_s_at	9.76e-09	2.33e-10	31.8	14.2212	1.07911	COL11A2	collagen, type XI, alpha 2
242012_at	9.78e-09	2.34e-10	-31.8	14.2178	-0.663566	LOC100508147	hypothetical LOC100508147
224268_x_at	9.79e-09	2.34e-10	-31.8	14.2166	-0.332362	ZAN	zonadhesin
1565845_at	9.84e-09	2.36e-10	31.7	14.2098	0.35859
1559508_at	9.85e-09	2.36e-10	-31.7	14.2083	-0.42102
41657_at	9.85e-09	2.36e-10	31.7	14.2067	1.08631	STK11	serine/threonine kinase 11
215705_at	9.91e-09	2.38e-10	-31.7	14.1995	-0.275816	PPP5C	protein phosphatase 5, catalytic subunit
243990_at	9.94e-09	2.39e-10	-31.7	14.1956	-0.351618
210641_at	9.98e-09	2.4e-10	-31.7	14.1906	-0.444736	CAPN9	calpain 9
244200_at	1e-08	2.41e-10	31.7	14.1872	0.404185
1553430_a_at	1e-08	2.42e-10	-31.6	14.1827	-0.40417	EDARADD	EDAR-associated death domain
225360_at	1.01e-08	2.43e-10	31.6	14.1783	0.733034	TRABD	TraB domain containing
237878_at	1.01e-08	2.44e-10	31.6	14.1747	0.923574
1557676_at	1.01e-08	2.44e-10	-31.6	14.1713	-0.361577
1555447_at	1.01e-08	2.44e-10	-31.6	14.1704	-0.423418	GPR114	G protein-coupled receptor 114
228684_at	1.02e-08	2.46e-10	31.6	14.1617	0.603507	ZNF503	zinc finger protein 503
206220_s_at	1.02e-08	2.47e-10	31.6	14.1593	0.414982	RASA3	RAS p21 protein activator 3
231557_at	1.02e-08	2.47e-10	31.6	14.1588	0.437207
209547_s_at	1.03e-08	2.49e-10	31.5	14.1525	3.37153	SUGP1	SURP and G patch domain containing 1
1554962_a_at	1.03e-08	2.49e-10	31.5	14.149	0.454192	FGFR4	fibroblast growth factor receptor 4
1561919_at	1.03e-08	2.5e-10	31.5	14.1476	0.56724
206187_at	1.03e-08	2.5e-10	31.5	14.1474	0.627373	PTGIR	prostaglandin I2 (prostacyclin) receptor (IP)
222676_at	1.03e-08	2.5e-10	31.5	14.1458	0.359305	FLJ30064///BRI3	uncharacterized LOC644975///brain protein I3
223910_at	1.03e-08	2.51e-10	31.5	14.1426	0.581348	ERN2	endoplasmic reticulum to nucleus signaling 2
210437_at	1.03e-08	2.51e-10	31.5	14.1419	0.346665	MAGEA9B///MAGEA9	melanoma antigen family A, 9B///melanoma antigen family A, 9
243194_at	1.03e-08	2.51e-10	31.5	14.1416	0.741034	ZNF551	zinc finger protein 551
220628_s_at	1.03e-08	2.51e-10	-31.5	14.1413	-0.395671	SDK2	sidekick cell adhesion molecule 2
216046_at	1.03e-08	2.51e-10	31.5	14.1407	0.591462
228356_at	1.04e-08	2.53e-10	31.5	14.1342	0.616952	ANKRD11	ankyrin repeat domain 11
237162_at	1.04e-08	2.54e-10	-31.5	14.1282	-0.537709	KANK1	KN motif and ankyrin repeat domains 1
1555317_at	1.04e-08	2.55e-10	31.4	14.124	0.648808	POLK	polymerase (DNA directed) kappa
221112_at	1.04e-08	2.55e-10	31.4	14.1233	0.331712	IL1RAPL2	interleukin 1 receptor accessory protein-like 2
242676_at	1.05e-08	2.56e-10	31.4	14.1188	0.682802
1561877_at	1.05e-08	2.56e-10	-31.4	14.1186	-0.392168	LOC100996624	uncharacterized LOC100996624
230952_at	1.06e-08	2.6e-10	-31.4	14.1028	-0.443602	RRN3P2	RNA polymerase I transcription factor homolog (S. cerevisiae) pseudogene 2
239531_at	1.06e-08	2.61e-10	-31.4	14.1004	-0.319834
229155_at	1.06e-08	2.61e-10	-31.4	14.0997	-0.404852
230429_at	1.06e-08	2.61e-10	31.4	14.0993	0.591002	ASPH	aspartate beta-hydroxylase
1554705_at	1.06e-08	2.61e-10	31.4	14.0991	0.461698	SCARA5	scavenger receptor class A, member 5 (putative)
1557027_at	1.06e-08	2.62e-10	31.4	14.097	0.459054	LOC100287221	uncharacterized LOC100287221
1552419_s_at	1.06e-08	2.62e-10	-31.3	14.0943	-0.325428	TTLL10	tubulin tyrosine ligase-like family, member 10
207323_s_at	1.07e-08	2.63e-10	31.3	14.0897	0.478464	MBP	myelin basic protein
230417_at	1.07e-08	2.63e-10	31.3	14.0896	0.286307	GALNT16	UDP-N-acetyl-alpha-D-galactosamine:polypeptide N-acetylgalactosaminyltransferase 16
235640_at	1.07e-08	2.63e-10	31.3	14.0896	2.06913
233010_at	1.07e-08	2.64e-10	31.3	14.0882	0.339544
241538_at	1.07e-08	2.64e-10	31.3	14.0874	0.470913	CXorf30	chromosome X open reading frame 30
210506_at	1.07e-08	2.64e-10	-31.3	14.0861	-0.366883	FUT7	fucosyltransferase 7 (alpha (1,3) fucosyltransferase)
237630_s_at	1.07e-08	2.64e-10	31.3	14.0856	1.49876	FAM86B3P	family with sequence similarity 86, member A pseudogene
1570651_at	1.07e-08	2.64e-10	31.3	14.0855	0.450272	CCBL1	cysteine conjugate-beta lyase, cytoplasmic
208154_at	1.07e-08	2.65e-10	-31.3	14.0841	-0.520347
240387_at	1.07e-08	2.65e-10	31.3	14.0821	0.587547	UBASH3B	ubiquitin associated and SH3 domain containing B
232173_at	1.08e-08	2.67e-10	-31.3	14.0728	-0.373369	CLEC2L	C-type lectin domain family 2, member L
224141_at	1.08e-08	2.68e-10	31.3	14.0722	0.359167	FLJ38668	uncharacterized LOC644903
1561273_at	1.08e-08	2.69e-10	31.3	14.0679	0.416729
1569588_x_at	1.08e-08	2.69e-10	-31.2	14.0642	-0.36253	PIK3C2A	phosphatidylinositol-4-phosphate 3-kinase, catalytic subunit type 2 alpha
238543_x_at	1.09e-08	2.72e-10	31.2	14.0546	0.587619	MDGA1	MAM domain containing glycosylphosphatidylinositol anchor 1
205848_at	1.09e-08	2.72e-10	31.2	14.054	2.50108	GAS2	growth arrest-specific 2
1556148_s_at	1.09e-08	2.72e-10	-31.2	14.0533	-0.671288	LOC100287426	hypothetical protein LOC100287426
244421_at	1.09e-08	2.73e-10	-31.2	14.0509	-0.340071
209697_at	1.09e-08	2.73e-10	-31.2	14.05	-0.345654	PPP3CC	protein phosphatase 3, catalytic subunit, gamma isozyme
231025_at	1.09e-08	2.73e-10	31.2	14.049	0.406957	SYT7	synaptotagmin VII
217603_at	1.09e-08	2.74e-10	31.2	14.0476	0.36236	ATP6V0A2	ATPase, H+ transporting, lysosomal V0 subunit a2
236719_at	1.1e-08	2.75e-10	31.2	14.0416	0.904453	LOC100506299	uncharacterized LOC100506299
237636_at	1.11e-08	2.78e-10	-31.1	14.0322	-0.368764	PPP2R2A	protein phosphatase 2, regulatory subunit B, alpha
244252_at	1.12e-08	2.8e-10	31.1	14.0224	0.729835	LOC399884	uncharacterized LOC399884
208282_x_at	1.12e-08	2.81e-10	31.1	14.0188	0.477077	DAZ4///DAZ2///DAZ3///DAZ1	deleted in azoospermia 4///deleted in azoospermia 2///deleted in azoospermia 3///deleted in azoospermia 1
222267_at	1.12e-08	2.82e-10	31.1	14.0152	0.730617	TMEM209	transmembrane protein 209
206119_at	1.15e-08	2.88e-10	31	13.9906	0.442403	BHMT	betaine--homocysteine S-methyltransferase
219904_at	1.15e-08	2.9e-10	31	13.9831	0.331585	ZSCAN5A	zinc finger and SCAN domain containing 5A
1561518_at	1.15e-08	2.9e-10	-31	13.9827	-0.324643	LOC283914	uncharacterized LOC283914
220862_s_at	1.15e-08	2.91e-10	31	13.9817	0.364727	USP22	ubiquitin specific peptidase 22
229818_at	1.16e-08	2.93e-10	31	13.9737	0.528115	SVOP	SV2 related protein homolog (rat)
1560476_at	1.16e-08	2.93e-10	-30.9	13.9726	-0.50617
244555_at	1.16e-08	2.93e-10	30.9	13.972	0.35441
232700_at	1.16e-08	2.93e-10	30.9	13.972	0.567936
210060_at	1.16e-08	2.93e-10	30.9	13.9716	0.522864	PDE6G	phosphodiesterase 6G, cGMP-specific, rod, gamma
38707_r_at	1.16e-08	2.94e-10	-30.9	13.9677	-0.278966	E2F4	E2F transcription factor 4, p107/p130-binding
222225_at	1.17e-08	2.96e-10	30.9	13.9618	0.905704	RPL23AP53	ribosomal protein L23a pseudogene 53
231221_at	1.17e-08	2.96e-10	-30.9	13.9614	-0.323999	CLEC16A	C-type lectin domain family 16, member A
1553464_at	1.17e-08	2.97e-10	-30.9	13.9586	-0.345158	FLJ40288	uncharacterized FLJ40288
239284_at	1.17e-08	2.97e-10	-30.9	13.9575	-0.293044
234198_at	1.18e-08	2.99e-10	-30.9	13.9498	-0.330426	KCNIP3	Kv channel interacting protein 3, calsenilin
1562305_x_at	1.18e-08	3.01e-10	30.9	13.945	0.3622	ZKSCAN3	zinc finger with KRAB and SCAN domains 3
214015_at	1.19e-08	3.03e-10	30.8	13.9369	0.365703	SOCS7	suppressor of cytokine signaling 7
208547_at	1.19e-08	3.04e-10	30.8	13.9341	0.691605	HIST1H2BB	histone cluster 1, H2bb
217349_s_at	1.21e-08	3.07e-10	-30.8	13.9224	-0.898134	PRICKLE3	prickle homolog 3 (Drosophila)
210583_at	1.21e-08	3.08e-10	30.8	13.9194	0.28369	POLDIP3	polymerase (DNA-directed), delta interacting protein 3
243975_at	1.21e-08	3.09e-10	-30.8	13.9163	-0.398045
236413_at	1.21e-08	3.09e-10	-30.8	13.914	-0.324337
242177_at	1.21e-08	3.1e-10	30.8	13.912	0.624933
211498_s_at	1.22e-08	3.11e-10	30.7	13.9093	0.520145	NKX3-1	NK3 homeobox 1
238630_at	1.22e-08	3.11e-10	30.7	13.9064	0.420147	OPA3	optic atrophy 3 (autosomal recessive, with chorea and spastic paraplegia)
240036_at	1.22e-08	3.13e-10	30.7	13.9	0.421942	SEC14L1	SEC14-like 1 (S. cerevisiae)
215279_at	1.22e-08	3.13e-10	30.7	13.8993	0.279465
1567527_at	1.23e-08	3.15e-10	30.7	13.8944	0.650079
207709_at	1.23e-08	3.15e-10	30.7	13.894	1.29075	PRKAA2	protein kinase, AMP-activated, alpha 2 catalytic subunit
1563878_a_at	1.23e-08	3.15e-10	-30.7	13.8922	-0.307135	LOC338963	epididymal protein pseudogene
217479_at	1.23e-08	3.16e-10	30.7	13.8909	0.548158
209221_s_at	1.25e-08	3.22e-10	30.6	13.8708	0.779131	OSBPL2	oxysterol binding protein-like 2
239685_at	1.25e-08	3.22e-10	30.6	13.8698	0.524596	LINC00900	long intergenic non-protein coding RNA 900
1566884_at	1.25e-08	3.23e-10	-30.6	13.8681	-0.358546
1569338_at	1.25e-08	3.23e-10	30.6	13.8678	0.559913	LOC100287558	uncharacterized LOC100287558
1561185_at	1.25e-08	3.23e-10	-30.6	13.866	-0.609066	TTTY7	testis-specific transcript, Y-linked 7 (non-protein coding)
1564816_at	1.26e-08	3.25e-10	30.6	13.8598	0.284554	C14orf178	chromosome 14 open reading frame 178
1557295_a_at	1.26e-08	3.25e-10	30.6	13.8597	0.408143
232137_at	1.26e-08	3.26e-10	-30.6	13.8579	-1.43381	ZNF616	zinc finger protein 616
38521_at	1.26e-08	3.26e-10	-30.6	13.8576	-0.325653	CD22	CD22 molecule
238954_at	1.26e-08	3.26e-10	-30.6	13.8559	-0.358353
1570065_at	1.26e-08	3.26e-10	30.6	13.8552	0.650738	C22orf34	chromosome 22 open reading frame 34
1552980_at	1.26e-08	3.26e-10	30.6	13.855	0.476278	HAS3	hyaluronan synthase 3
231008_at	1.26e-08	3.28e-10	-30.6	13.8507	-2.80423	UNC5CL	unc-5 homolog C (C. elegans)-like
1569378_at	1.27e-08	3.28e-10	30.5	13.8492	0.440626	LINC00942	long intergenic non-protein coding RNA 942
230709_x_at	1.27e-08	3.3e-10	30.5	13.8427	0.481118	ZBTB7A	zinc finger and BTB domain containing 7A
222078_at	1.28e-08	3.31e-10	30.5	13.8391	0.662848	PKLR	pyruvate kinase, liver and RBC
1568977_at	1.28e-08	3.32e-10	30.5	13.8381	0.309884	RNASET2	ribonuclease T2
227883_at	1.28e-08	3.33e-10	-30.5	13.8344	-0.303802	CCDC71L	coiled-coil domain containing 71-like
243476_at	1.28e-08	3.34e-10	30.5	13.8308	0.68801	NF1	neurofibromin 1
236135_at	1.29e-08	3.35e-10	30.5	13.8269	0.365469	PNPLA7	patatin-like phospholipase domain containing 7
220410_s_at	1.29e-08	3.36e-10	-30.5	13.822	-0.56064	CAMSAP1	calmodulin regulated spectrin-associated protein 1
1559166_at	1.3e-08	3.4e-10	30.4	13.8106	0.299408
237924_at	1.3e-08	3.41e-10	-30.4	13.8087	-0.608714
220533_at	1.32e-08	3.45e-10	-30.4	13.7936	-0.615954
236625_at	1.33e-08	3.47e-10	-30.4	13.7897	-0.406207
205695_at	1.34e-08	3.5e-10	-30.3	13.7803	-0.319265	SDS	serine dehydratase
1559003_a_at	1.34e-08	3.51e-10	-30.3	13.7765	-0.890738	CCDC163P	coiled-coil domain containing 163, pseudogene
1569353_at	1.35e-08	3.53e-10	30.3	13.7704	0.299291	CCP110	centriolar coiled coil protein 110kDa
1553458_at	1.36e-08	3.55e-10	-30.3	13.7621	-0.307836	VSTM4	V-set and transmembrane domain containing 4
238633_at	1.36e-08	3.56e-10	-30.3	13.7597	-0.460684
241501_at	1.36e-08	3.57e-10	30.3	13.7562	0.388864
226494_at	1.36e-08	3.58e-10	30.2	13.7553	1.75693	CAMSAP3	calmodulin regulated spectrin-associated protein family, member 3
240577_at	1.37e-08	3.59e-10	-30.2	13.7516	-0.568094	TRAF3IP2-AS1	TRAF3IP2 antisense RNA 1
210375_at	1.37e-08	3.6e-10	-30.2	13.7471	-1.08158	PTGER3	prostaglandin E receptor 3 (subtype EP3)
209841_s_at	1.37e-08	3.61e-10	-30.2	13.7463	-0.393881	LRRN3	leucine rich repeat neuronal 3
217567_at	1.39e-08	3.65e-10	30.2	13.7318	0.429958	TGM4	transglutaminase 4
228187_at	1.39e-08	3.67e-10	30.2	13.7273	0.365098	GAS1	growth arrest-specific 1
233235_x_at	1.4e-08	3.68e-10	30.1	13.7239	0.589619
235624_at	1.4e-08	3.68e-10	30.1	13.7234	0.418777	HDLBP	high density lipoprotein binding protein
216331_at	1.4e-08	3.7e-10	-30.1	13.7191	-0.975503	ITGA7	integrin, alpha 7
207486_x_at	1.4e-08	3.7e-10	30.1	13.7176	1.53551	CHN2	chimerin 2
1559444_at	1.4e-08	3.7e-10	30.1	13.7171	0.472097
214312_at	1.41e-08	3.72e-10	-30.1	13.7114	-0.305276	FOXA2	forkhead box A2
1559340_at	1.41e-08	3.72e-10	30.1	13.7111	0.409	TTLL11-IT1	TTLL11 intronic transcript 1 (non-protein coding)
1557262_at	1.41e-08	3.73e-10	-30.1	13.7096	-0.608059
1561604_at	1.42e-08	3.77e-10	30.1	13.699	0.4044
231052_at	1.42e-08	3.77e-10	-30.1	13.6983	-0.373045	GLOD5	glyoxalase domain containing 5
238241_at	1.43e-08	3.8e-10	30	13.6887	0.749861	LOC100144602	uncharacterized LOC100144602
214676_x_at	1.44e-08	3.83e-10	30	13.6815	1.07912	MUC3A	mucin 3A, cell surface associated
206712_at	1.44e-08	3.83e-10	-30	13.6807	-0.453177	GRTP1	growth hormone regulated TBC protein 1
243556_at	1.45e-08	3.86e-10	30	13.6716	0.350875	NGEF	neuronal guanine nucleotide exchange factor
232702_at	1.46e-08	3.88e-10	30	13.6667	0.697904	RABGAP1L	RAB GTPase activating protein 1-like
244378_at	1.46e-08	3.9e-10	29.9	13.6607	0.446404	HECTD4	HECT domain containing E3 ubiquitin protein ligase 4
224124_at	1.47e-08	3.92e-10	29.9	13.6551	0.35725	ZRANB3	zinc finger, RAN-binding domain containing 3
235903_at	1.48e-08	3.94e-10	29.9	13.6492	0.842079	ANKS6	ankyrin repeat and sterile alpha motif domain containing 6
1553533_at	1.49e-08	3.97e-10	29.9	13.642	1.27347	JPH1	junctophilin 1
206427_s_at	1.49e-08	3.98e-10	-29.9	13.6379	-0.341016	MLANA	melan-A
1570303_at	1.5e-08	4e-10	29.9	13.6329	0.55274
243586_at	1.5e-08	4.02e-10	29.8	13.6275	0.377619
223752_at	1.5e-08	4.02e-10	-29.8	13.6271	-0.415107	CFC1	cripto, FRL-1, cryptic family 1
1558308_at	1.5e-08	4.03e-10	29.8	13.6246	0.367684	LINC00942	long intergenic non-protein coding RNA 942
1562563_at	1.5e-08	4.03e-10	29.8	13.6242	0.284794	HCN1	hyperpolarization activated cyclic nucleotide-gated potassium channel 1
240514_at	1.5e-08	4.04e-10	29.8	13.6231	0.546402	PGA3	pepsinogen 3, group I (pepsinogen A)
211827_s_at	1.52e-08	4.07e-10	29.8	13.6143	0.681374	KCND3	potassium voltage-gated channel, Shal-related subfamily, member 3
216329_at	1.52e-08	4.09e-10	29.8	13.6098	0.343494
238073_at	1.52e-08	4.09e-10	29.8	13.6076	0.658183	ELAVL4	ELAV (embryonic lethal, abnormal vision, Drosophila)-like 4
237202_at	1.52e-08	4.1e-10	-29.8	13.6065	-0.355249	PGPEP1	pyroglutamyl-peptidase I
216423_at	1.52e-08	4.1e-10	29.8	13.6049	0.316948
214456_x_at	1.53e-08	4.11e-10	-29.8	13.6024	-0.412267	SAA2///SAA1	serum amyloid A2///serum amyloid A1
235397_at	1.53e-08	4.11e-10	-29.8	13.6022	-0.313797	LINC00174	long intergenic non-protein coding RNA 174
240164_at	1.53e-08	4.12e-10	-29.8	13.6011	-0.373348	MUC4	mucin 4, cell surface associated
1556301_at	1.55e-08	4.17e-10	-29.7	13.5865	-0.873204	LOC100287015	uncharacterized LOC100287015
214986_x_at	1.55e-08	4.19e-10	29.7	13.5833	1.07141	PPIL2	peptidylprolyl isomerase (cyclophilin)-like 2
1563509_at	1.55e-08	4.2e-10	29.7	13.5798	0.475952
240759_at	1.55e-08	4.2e-10	29.7	13.5796	0.849939
207866_at	1.55e-08	4.2e-10	-29.7	13.5785	-0.29927	BMP8A	bone morphogenetic protein 8a
1558483_at	1.56e-08	4.22e-10	-29.7	13.5747	-0.850689	LRRC27	leucine rich repeat containing 27
243543_at	1.56e-08	4.23e-10	29.7	13.5722	0.881726
237826_at	1.56e-08	4.23e-10	29.7	13.572	0.342223
239021_at	1.58e-08	4.29e-10	29.6	13.5573	1.0468	TLR6	toll-like receptor 6
206152_at	1.58e-08	4.3e-10	29.6	13.5541	0.760191	AGAP2	ArfGAP with GTPase domain, ankyrin repeat and PH domain 2
242970_at	1.58e-08	4.31e-10	29.6	13.5519	0.358513	DIP2B	DIP2 disco-interacting protein 2 homolog B (Drosophila)
223517_at	1.58e-08	4.31e-10	29.6	13.5519	0.954304	FBXO44	F-box protein 44
231642_at	1.59e-08	4.33e-10	29.6	13.5465	0.616881	C6orf201	chromosome 6 open reading frame 201
1561318_at	1.61e-08	4.38e-10	29.6	13.5348	0.327133
236159_x_at	1.61e-08	4.38e-10	-29.6	13.5344	-0.322899	CALM2	calmodulin 2 (phosphorylase kinase, delta)
1562510_at	1.61e-08	4.39e-10	29.5	13.5318	0.756828	LOC339442	uncharacterized LOC339442
239160_at	1.61e-08	4.39e-10	-29.5	13.5304	-0.283297
238400_at	1.61e-08	4.4e-10	-29.5	13.5299	-0.309848	ENDOV	endonuclease V
214643_x_at	1.61e-08	4.4e-10	-29.5	13.5296	-0.280898	BIN1	bridging integrator 1
213928_s_at	1.61e-08	4.41e-10	29.5	13.5259	0.30462	AGFG1	ArfGAP with FG repeats 1
234591_at	1.61e-08	4.41e-10	29.5	13.5258	0.369378
231317_at	1.62e-08	4.44e-10	29.5	13.52	0.2891
232845_at	1.62e-08	4.44e-10	-29.5	13.5196	-0.342146	CDH23	cadherin-related 23
229516_at	1.62e-08	4.44e-10	29.5	13.5184	1.71636	WDR31	WD repeat domain 31
231219_at	1.62e-08	4.46e-10	29.5	13.5146	0.391389	CMTM1	CKLF-like MARVEL transmembrane domain containing 1
1569538_at	1.64e-08	4.51e-10	29.5	13.5029	0.763262
232950_s_at	1.64e-08	4.51e-10	29.5	13.5015	0.698889	PITPNM2	phosphatidylinositol transfer protein, membrane-associated 2
1556737_at	1.64e-08	4.52e-10	29.4	13.4991	0.449063	LINC00671	long intergenic non-protein coding RNA 671
240399_at	1.64e-08	4.52e-10	29.4	13.499	1.16397
33197_at	1.66e-08	4.56e-10	-29.4	13.4892	-0.690811	MYO7A	myosin VIIA
1560694_at	1.66e-08	4.57e-10	29.4	13.4882	0.376091	SFT2D1	SFT2 domain containing 1
231479_at	1.67e-08	4.59e-10	-29.4	13.4825	-0.559281	TTC33	tetratricopeptide repeat domain 33
207020_at	1.68e-08	4.62e-10	29.4	13.4753	0.335254	HSF2BP	heat shock transcription factor 2 binding protein
223745_at	1.68e-08	4.63e-10	-29.4	13.4735	-0.42974
222349_x_at	1.68e-08	4.64e-10	-29.4	13.47	-1.87786	RNF126P1	ring finger protein 126 pseudogene 1
241490_s_at	1.68e-08	4.65e-10	-29.3	13.4675	-0.29877	PGBD2	piggyBac transposable element derived 2
241584_at	1.68e-08	4.66e-10	-29.3	13.4668	-0.331847
1553162_x_at	1.69e-08	4.68e-10	29.3	13.4617	0.96863	C19orf55	chromosome 19 open reading frame 55
233795_at	1.69e-08	4.68e-10	29.3	13.4612	0.763899	ODF3	outer dense fiber of sperm tails 3
234813_at	1.69e-08	4.7e-10	-29.3	13.457	-0.326432	TMEM108	transmembrane protein 108
232256_s_at	1.69e-08	4.7e-10	-29.3	13.457	-0.265853	LOC401321	uncharacterized LOC401321
1558420_at	1.71e-08	4.74e-10	29.3	13.4483	0.330701	C14orf180	chromosome 14 open reading frame 180
230385_at	1.71e-08	4.75e-10	29.3	13.4445	0.403757	2014-03-03	membrane-associated ring finger (C3HC4) 3, E3 ubiquitin protein ligase
216492_at	1.72e-08	4.77e-10	29.3	13.4409	0.328592	KIR3DX1	killer cell immunoglobulin-like receptor, three domains, X1
1562946_at	1.73e-08	4.81e-10	29.2	13.4325	0.588797
213520_at	1.73e-08	4.82e-10	29.2	13.4286	0.371302	RECQL4	RecQ protein-like 4
1562590_at	1.74e-08	4.85e-10	29.2	13.423	0.412312	PRTG	protogenin
232648_at	1.74e-08	4.85e-10	29.2	13.422	0.668445	PSMA3	proteasome (prosome, macropain) subunit, alpha type, 3
206794_at	1.77e-08	4.93e-10	29.2	13.4053	0.705389	ERBB4	v-erb-a erythroblastic leukemia viral oncogene homolog 4 (avian)
214128_at	1.77e-08	4.93e-10	29.1	13.4038	0.499765	DAGLA	diacylglycerol lipase, alpha
1557413_a_at	1.77e-08	4.95e-10	29.1	13.4007	0.287175
229793_at	1.79e-08	5e-10	-29.1	13.3895	-0.60789	ASAH2B	N-acylsphingosine amidohydrolase (non-lysosomal ceramidase) 2B
230007_at	1.79e-08	5.01e-10	-29.1	13.3866	-0.276606	JMJD1C	jumonji domain containing 1C
1563048_at	1.79e-08	5.01e-10	-29.1	13.3864	-0.313763
207575_at	1.79e-08	5.02e-10	29.1	13.3859	0.44066	GOLGA6A	golgin A6 family, member A
213722_at	1.79e-08	5.02e-10	-29.1	13.3858	-0.381719	SOX2	SRY (sex determining region Y)-box 2
227460_at	1.79e-08	5.02e-10	29.1	13.385	0.336709	FAM208A	family with sequence similarity 208, member A
238216_at	1.8e-08	5.04e-10	29.1	13.3814	0.478857
1553246_a_at	1.81e-08	5.07e-10	-29.1	13.3739	-0.33449	SGK196	protein kinase-like protein SgK196
1553475_at	1.81e-08	5.09e-10	29	13.3707	0.448309	PRO1483	uncharacterized LOC55448
219499_at	1.83e-08	5.14e-10	29	13.3597	0.79657	SEC61A2	Sec61 alpha 2 subunit (S. cerevisiae)
206126_at	1.83e-08	5.15e-10	-29	13.3572	-0.296263	CXCR5	chemokine (C-X-C motif) receptor 5
240485_at	1.85e-08	5.2e-10	29	13.3471	0.367421
234422_at	1.85e-08	5.2e-10	-29	13.3467	-0.326804
207609_s_at	1.85e-08	5.2e-10	29	13.3456	0.383905	CYP1A2	cytochrome P450, family 1, subfamily A, polypeptide 2
230547_at	1.85e-08	5.22e-10	29	13.3416	0.413935	KCNC1	potassium voltage-gated channel, Shaw-related subfamily, member 1
213690_s_at	1.85e-08	5.23e-10	29	13.341	0.51543	LOC100506002	hypothetical protein LOC100506002
217060_at	1.85e-08	5.23e-10	29	13.3409	0.547269
1562392_at	1.86e-08	5.24e-10	-28.9	13.3371	-0.367862	MRPL23	mitochondrial ribosomal protein L23
234860_at	1.86e-08	5.27e-10	28.9	13.3315	0.388059
234495_at	1.86e-08	5.27e-10	28.9	13.3315	0.483789	KLK15	kallikrein-related peptidase 15
241166_at	1.86e-08	5.27e-10	28.9	13.3315	0.362204
232877_at	1.87e-08	5.29e-10	28.9	13.3275	0.655833
1553690_at	1.88e-08	5.33e-10	28.9	13.3192	0.406497	SGOL1	shugoshin-like 1 (S. pombe)
1554826_at	1.89e-08	5.35e-10	28.9	13.3143	0.556735	CDK15	cyclin-dependent kinase 15
222005_s_at	1.89e-08	5.36e-10	-28.9	13.3132	-0.390621	GNG3	guanine nucleotide binding protein (G protein), gamma 3
241486_at	1.9e-08	5.38e-10	28.9	13.3081	0.389111
235586_at	1.9e-08	5.39e-10	28.9	13.3075	0.448916
216019_x_at	1.91e-08	5.42e-10	28.8	13.3008	1.25476	PHLDB1	pleckstrin homology-like domain, family B, member 1
1553209_at	1.91e-08	5.42e-10	28.8	13.3005	0.342955	RNFT2	ring finger protein, transmembrane 2
243452_at	1.91e-08	5.44e-10	-28.8	13.2973	-0.307746	LOC646778	uncharacterized LOC646778
211181_x_at	1.93e-08	5.48e-10	-28.8	13.2881	-0.29091	RUNX1	runt-related transcription factor 1
1569624_at	1.93e-08	5.49e-10	28.8	13.2869	0.485776
233803_s_at	1.95e-08	5.55e-10	-28.8	13.2745	-0.889432	MYBBP1A	MYB binding protein (P160) 1a
232240_at	1.96e-08	5.6e-10	28.7	13.2656	0.306412	DNHD1	dynein heavy chain domain 1
1556914_at	1.96e-08	5.61e-10	28.7	13.2641	0.454975	LOC100652911	uncharacterized LOC100652911
205948_at	1.97e-08	5.62e-10	-28.7	13.262	-0.350082	PTPRT	protein tyrosine phosphatase, receptor type, T
1553761_at	1.97e-08	5.63e-10	28.7	13.26	0.388795	PRR14L	proline rich 14-like
219781_s_at	1.99e-08	5.69e-10	-28.7	13.2484	-0.303684	ZNF771	zinc finger protein 771
235776_x_at	1.99e-08	5.69e-10	28.7	13.2473	0.465456	LOC100507197	hypothetical LOC100507197
211603_s_at	2e-08	5.74e-10	-28.6	13.2392	-0.426198	ETV4	ets variant 4
227645_at	2.04e-08	5.84e-10	-28.6	13.2196	-0.383928	PIK3R5	phosphoinositide-3-kinase, regulatory subunit 5
241240_at	2.04e-08	5.85e-10	28.6	13.2184	0.7519
208315_x_at	2.04e-08	5.85e-10	-28.6	13.2175	-1.15363	TRAF3	TNF receptor-associated factor 3
1566697_at	2.04e-08	5.86e-10	28.6	13.2159	0.324228
234443_at	2.05e-08	5.88e-10	-28.6	13.2117	-0.49091
236214_at	2.06e-08	5.91e-10	28.5	13.2056	0.32283	FAM71F1	family with sequence similarity 71, member F1
1570618_at	2.06e-08	5.94e-10	28.5	13.201	0.500332
242993_at	2.07e-08	5.95e-10	-28.5	13.199	-0.577301
222211_x_at	2.08e-08	5.98e-10	-28.5	13.1937	-0.313215	SCAND2P	SCAN domain containing 2 pseudogene
1556504_at	2.08e-08	5.99e-10	-28.5	13.1914	-0.473934
219752_at	2.08e-08	6.01e-10	28.5	13.1885	2.07891	RASAL1	RAS protein activator like 1 (GAP1 like)
1554986_a_at	2.09e-08	6.02e-10	28.5	13.1854	0.634626	SNX19	sorting nexin 19
1558147_a_at	2.09e-08	6.03e-10	28.5	13.1835	0.272407	BAIAP2-AS1	BAIAP2 antisense RNA 1 (head to head)
223832_s_at	2.09e-08	6.04e-10	28.5	13.1824	0.375645	CAPNS2	calpain, small subunit 2
233069_at	2.09e-08	6.05e-10	-28.5	13.1816	-0.363804	PPP4R1L	protein phosphatase 4, regulatory subunit 1-like
238676_at	2.09e-08	6.05e-10	-28.5	13.1814	-0.335089
1570176_at	2.09e-08	6.05e-10	28.5	13.181	0.55741
37796_at	2.09e-08	6.06e-10	-28.5	13.1792	-0.274339	SAP25///LRCH4	Sin3A-associated protein, 25kDa///leucine-rich repeats and calponin homology (CH) domain containing 4
1558766_at	2.11e-08	6.11e-10	-28.4	13.1692	-1.67745
242148_at	2.11e-08	6.13e-10	28.4	13.167	0.608471	BCL6B	B-cell CLL/lymphoma 6, member B
1560897_a_at	2.15e-08	6.23e-10	-28.4	13.1489	-0.36783	KRTAP10-11	keratin associated protein 10-11
236996_at	2.15e-08	6.23e-10	28.4	13.1483	0.686719
1562309_s_at	2.18e-08	6.35e-10	28.3	13.1279	0.83376	PHF21B	PHD finger protein 21B
233514_x_at	2.2e-08	6.39e-10	28.3	13.1214	0.361933	TEX11	testis expressed 11
233544_at	2.21e-08	6.42e-10	-28.3	13.116	-0.399809	GNL1	guanine nucleotide binding protein-like 1
213785_at	2.21e-08	6.43e-10	-28.3	13.1138	-0.666131	IPO9	importin 9
1556030_at	2.23e-08	6.49e-10	28.2	13.1032	0.989242	SMTN	smoothelin
235186_at	2.23e-08	6.5e-10	28.2	13.1023	0.878476	LOC388692	uncharacterized LOC388692
1556899_at	2.25e-08	6.57e-10	-28.2	13.0905	-0.332508	PRMT5-AS1	PRMT5 antisense RNA 1
1557480_a_at	2.26e-08	6.59e-10	28.2	13.0871	0.601647	PPP1R27	protein phosphatase 1, regulatory subunit 27
240337_at	2.28e-08	6.65e-10	28.2	13.0766	0.578599	RHOA	ras homolog family member A
243710_at	2.28e-08	6.66e-10	28.2	13.0754	0.472871
1555904_at	2.28e-08	6.66e-10	28.2	13.075	1.10309
230574_at	2.29e-08	6.69e-10	-28.1	13.0709	-0.290819	LOC100130938	uncharacterized LOC100130938
1561405_s_at	2.33e-08	6.82e-10	28.1	13.0495	0.384842	CATSPER2	cation channel, sperm associated 2
1553222_at	2.34e-08	6.84e-10	28.1	13.0459	0.286767	OXER1	oxoeicosanoid (OXE) receptor 1
1557372_at	2.35e-08	6.88e-10	28.1	13.0402	0.359222	FLJ41757	uncharacterized LOC440862
1564075_a_at	2.35e-08	6.89e-10	-28	13.0382	-0.367397	C17orf104	chromosome 17 open reading frame 104
240010_at	2.36e-08	6.92e-10	28	13.0335	0.333545
210864_x_at	2.39e-08	7.01e-10	-28	13.0191	-0.490878	HFE	hemochromatosis
215104_at	2.39e-08	7.03e-10	-28	13.0158	-0.521967	NRIP2	nuclear receptor interacting protein 2
242696_at	2.4e-08	7.07e-10	28	13.0099	0.530138
1564552_at	2.42e-08	7.12e-10	-27.9	13.0027	-0.337603
237565_at	2.44e-08	7.19e-10	-27.9	12.9918	-0.515434	GCC2	GRIP and coiled-coil domain containing 2
238836_at	2.45e-08	7.22e-10	27.9	12.9876	0.653619
230392_at	2.45e-08	7.23e-10	-27.9	12.986	-0.479939
223390_at	2.45e-08	7.23e-10	-27.9	12.9855	-0.995146	C9orf37	chromosome 9 open reading frame 37
1565852_at	2.45e-08	7.23e-10	27.9	12.9854	0.485711
1558238_at	2.47e-08	7.3e-10	-27.9	12.9758	-0.582992	TNRC18	trinucleotide repeat containing 18
1561963_at	2.47e-08	7.31e-10	27.9	12.9743	0.338821	MIR4296	microRNA 4296
1555429_at	2.48e-08	7.33e-10	27.9	12.9709	0.355418
1563884_at	2.49e-08	7.36e-10	27.8	12.9659	0.41919
234333_at	2.49e-08	7.37e-10	-27.8	12.9654	-0.426606	KIAA2022	KIAA2022
209371_s_at	2.49e-08	7.37e-10	-27.8	12.9651	-0.830285	SH3BP2	SH3-domain binding protein 2
1557783_at	2.49e-08	7.37e-10	27.8	12.9649	0.809584	MAP3K14-AS1	MAP3K14 antisense RNA 1
216940_x_at	2.49e-08	7.38e-10	27.8	12.9636	0.55178	YBX1P2///YBX1	Y box binding protein 1 pseudogene 2///Y box binding protein 1
1562507_at	2.5e-08	7.42e-10	27.8	12.9566	0.500438
228270_at	2.5e-08	7.43e-10	-27.8	12.9555	-0.323511	ZNF853	zinc finger protein 853
208269_s_at	2.52e-08	7.5e-10	27.8	12.9458	0.298577	ADAM28	ADAM metallopeptidase domain 28
224271_x_at	2.52e-08	7.5e-10	-27.8	12.9456	-0.575699	FRMD8P1	FERM domain containing 8 pseudogene 1
206738_at	2.52e-08	7.5e-10	27.8	12.945	0.473613	APOC4	apolipoprotein C-IV
201902_s_at	2.52e-08	7.51e-10	27.8	12.9435	0.296597	YY1	YY1 transcription factor
1567333_at	2.54e-08	7.57e-10	27.7	12.9356	0.553629
216932_at	2.55e-08	7.61e-10	27.7	12.9302	0.307558
1562759_at	2.56e-08	7.64e-10	27.7	12.9259	0.334673
223198_x_at	2.56e-08	7.65e-10	27.7	12.9234	0.45302	COMMD5	COMM domain containing 5
227513_s_at	2.56e-08	7.66e-10	27.7	12.923	0.290072	LRRFIP1	leucine rich repeat (in FLII) interacting protein 1
234846_at	2.56e-08	7.66e-10	-27.7	12.9228	-0.671162
1566473_a_at	2.56e-08	7.66e-10	27.7	12.9226	0.501382	LOC100996506	all-trans-retinol 13,14-reductase-like
232106_s_at	2.58e-08	7.71e-10	27.7	12.916	1.2733	CEP89	centrosomal protein 89kDa
239255_at	2.58e-08	7.71e-10	27.7	12.9148	0.296389
208354_s_at	2.58e-08	7.74e-10	27.7	12.9115	0.343426	SLC12A3	solute carrier family 12 (sodium/chloride transporters), member 3
1558148_x_at	2.6e-08	7.8e-10	27.7	12.9031	0.292192	BAIAP2-AS1	BAIAP2 antisense RNA 1 (head to head)
207762_at	2.6e-08	7.82e-10	27.6	12.9002	0.402651	LPAL2	lipoprotein, Lp(a)-like 2, pseudogene
1569058_at	2.6e-08	7.82e-10	27.6	12.9	0.682287	GTF3C3	general transcription factor IIIC, polypeptide 3, 102kDa
1566498_at	2.61e-08	7.84e-10	27.6	12.8965	0.282453
242205_at	2.63e-08	7.89e-10	-27.6	12.8897	-1.25727
1565733_at	2.63e-08	7.91e-10	27.6	12.8876	0.302436
205058_at	2.63e-08	7.91e-10	-27.6	12.8872	-0.537076	SLC26A1	solute carrier family 26 (sulfate transporter), member 1
219632_s_at	2.63e-08	7.92e-10	-27.6	12.8862	-0.896058	TRPV1	transient receptor potential cation channel, subfamily V, member 1
239615_at	2.64e-08	7.94e-10	-27.6	12.883	-0.50317
1555675_at	2.64e-08	7.96e-10	-27.6	12.8805	-0.390829	BLID	BH3-like motif containing, cell death inducer
228637_at	2.64e-08	7.97e-10	27.6	12.8795	1.70412	ZDHHC1	zinc finger, DHHC-type containing 1
242728_at	2.69e-08	8.12e-10	27.5	12.8586	0.381498
216852_x_at	2.69e-08	8.13e-10	-27.5	12.8572	-0.278762	IGL	immunoglobulin lambda locus
220348_at	2.7e-08	8.15e-10	-27.5	12.8551	-0.322464	KLHL29	kelch-like family member 29
224466_s_at	2.7e-08	8.15e-10	27.5	12.8547	0.293691	MAFG	v-maf musculoaponeurotic fibrosarcoma oncogene homolog G (avian)
235135_at	2.7e-08	8.16e-10	27.5	12.8537	0.522276	TAF10	TAF10 RNA polymerase II, TATA box binding protein (TBP)-associated factor, 30kDa
232089_at	2.71e-08	8.21e-10	27.5	12.8463	0.329876	TIGD7	tigger transposable element derived 7
1570330_at	2.71e-08	8.22e-10	27.5	12.8455	0.29058
223994_s_at	2.72e-08	8.24e-10	27.5	12.8428	1.47086	SLC12A9	solute carrier family 12 (potassium/chloride transporters), member 9
1564881_at	2.72e-08	8.26e-10	27.5	12.84	0.394631	LOC152578	uncharacterized LOC152578
242375_x_at	2.73e-08	8.28e-10	27.5	12.8372	0.351301
1555478_at	2.73e-08	8.28e-10	-27.5	12.8371	-0.266384	C17orf82	chromosome 17 open reading frame 82
229985_at	2.75e-08	8.37e-10	27.4	12.8258	0.438795
1560499_at	2.76e-08	8.4e-10	27.4	12.822	0.371624	C14orf64	chromosome 14 open reading frame 64
1556452_a_at	2.78e-08	8.44e-10	27.4	12.816	0.334329	LINC00928	long intergenic non-protein coding RNA 928
1569751_at	2.79e-08	8.48e-10	27.4	12.8107	0.408688	TBC1D26///ZNF286A	TBC1 domain family, member 26///zinc finger protein 286A
1555468_at	2.79e-08	8.49e-10	27.4	12.8097	0.341286	NRP2	neuropilin 2
1562924_at	2.79e-08	8.51e-10	-27.4	12.8068	-0.297502	LOC340357	uncharacterized LOC340357
243996_at	2.79e-08	8.52e-10	-27.4	12.8059	-0.448782
223634_at	2.79e-08	8.52e-10	27.4	12.8057	0.311397	RASD2	RASD family, member 2
240703_s_at	2.8e-08	8.54e-10	27.4	12.8027	0.705393	HERC1	HECT and RLD domain containing E3 ubiquitin protein ligase family member 1
1553396_a_at	2.8e-08	8.55e-10	27.4	12.8027	1.18964	CCDC13	coiled-coil domain containing 13
236516_at	2.8e-08	8.55e-10	-27.4	12.8026	-0.328877
1554742_at	2.8e-08	8.57e-10	27.4	12.7993	1.16723	PMS1	PMS1 postmeiotic segregation increased 1 (S. cerevisiae)
222337_at	2.81e-08	8.61e-10	-27.3	12.7945	-0.605294
39318_at	2.82e-08	8.62e-10	-27.3	12.7927	-0.349987	TCL1A	T-cell leukemia/lymphoma 1A
1561670_at	2.82e-08	8.64e-10	27.3	12.7906	0.363613
217488_x_at	2.82e-08	8.65e-10	27.3	12.7887	0.27987	PMS2P3	postmeiotic segregation increased 2 pseudogene 3
207449_s_at	2.83e-08	8.68e-10	27.3	12.7854	0.788242	POFUT2	protein O-fucosyltransferase 2
214070_s_at	2.85e-08	8.76e-10	27.3	12.7756	0.287355	ATP10B	ATPase, class V, type 10B
240490_at	2.87e-08	8.8e-10	27.3	12.7703	0.499012
37793_r_at	2.87e-08	8.81e-10	-27.3	12.7689	-0.369321	RAD51D	RAD51 homolog D (S. cerevisiae)
238509_at	2.88e-08	8.84e-10	-27.3	12.765	-1.57076	CUL1	cullin 1
231599_x_at	2.88e-08	8.87e-10	27.2	12.7614	1.45004	DPF1	D4, zinc and double PHD fingers family 1
1560705_at	2.89e-08	8.9e-10	27.2	12.7587	0.61399
214299_at	2.89e-08	8.9e-10	-27.2	12.7577	-0.840141	TOP3A	topoisomerase (DNA) III alpha
1570366_x_at	2.89e-08	8.91e-10	-27.2	12.7563	-0.772728	ZNF709	zinc finger protein 709
233435_at	2.89e-08	8.92e-10	-27.2	12.7553	-0.352077
234072_at	2.91e-08	8.98e-10	27.2	12.7487	0.382082	SEMA4A	sema domain, immunoglobulin domain (Ig), transmembrane domain (TM) and short cytoplasmic domain, (semaphorin) 4A
244037_at	2.91e-08	9.01e-10	-27.2	12.7452	-0.331283
203332_s_at	2.91e-08	9.01e-10	-27.2	12.7452	-1.48043	INPP5D	inositol polyphosphate-5-phosphatase, 145kDa
244737_at	2.91e-08	9.01e-10	-27.2	12.7452	-0.378182
222888_at	2.91e-08	9.01e-10	27.2	12.7449	0.638923	CCNJ	cyclin J
238780_s_at	2.91e-08	9.01e-10	27.2	12.7445	0.429677
1555792_a_at	2.91e-08	9.01e-10	-27.2	12.7443	-0.307022	CCDC116	coiled-coil domain containing 116
1554335_at	2.92e-08	9.06e-10	-27.2	12.7384	-0.339577	CYTH4	cytohesin 4
1566231_at	2.93e-08	9.09e-10	27.2	12.7347	0.268423
242953_at	2.93e-08	9.09e-10	-27.2	12.7344	-1.02439	ZNF234	zinc finger protein 234
229911_at	2.94e-08	9.12e-10	27.2	12.7308	0.574274	TPM2	tropomyosin 2 (beta)
231151_at	2.95e-08	9.17e-10	-27.1	12.7254	-0.291326	DLGAP3	discs, large (Drosophila) homolog-associated protein 3
230835_at	2.95e-08	9.18e-10	27.1	12.7245	0.332112	KRTDAP	keratinocyte differentiation-associated protein
222818_at	2.95e-08	9.18e-10	27.1	12.7241	0.333685	OSBPL10	oxysterol binding protein-like 10
223817_at	2.95e-08	9.18e-10	27.1	12.7238	0.533084	LRRIQ1	leucine-rich repeats and IQ motif containing 1
220758_s_at	2.96e-08	9.22e-10	27.1	12.7195	0.376301	ROBO4	roundabout, axon guidance receptor, homolog 4 (Drosophila)
1554847_at	2.97e-08	9.24e-10	27.1	12.7173	0.534803	ATP6V1B1	ATPase, H+ transporting, lysosomal 56/58kDa, V1 subunit B1
209950_s_at	2.97e-08	9.26e-10	-27.1	12.7144	-0.936513	VILL	villin-like
240396_at	2.98e-08	9.3e-10	27.1	12.7104	0.485095	IL20RA	interleukin 20 receptor, alpha
233605_x_at	3e-08	9.37e-10	27.1	12.7014	1.51297	HNRNPM	heterogeneous nuclear ribonucleoprotein M
234381_at	3.01e-08	9.38e-10	27.1	12.7002	0.707428	IGLV4-3	immunoglobulin lambda variable 4-3
1558330_x_at	3.05e-08	9.52e-10	27	12.6843	0.318129	TONSL	tonsoku-like, DNA repair protein
207224_s_at	3.07e-08	9.6e-10	27	12.6749	0.80383	SIGLEC7	sialic acid binding Ig-like lectin 7
239495_at	3.08e-08	9.62e-10	-27	12.6724	-0.454292
230926_s_at	3.08e-08	9.63e-10	27	12.6721	0.780346	ODF2L	outer dense fiber of sperm tails 2-like
232437_at	3.09e-08	9.68e-10	-27	12.6656	-0.727706	CPSF3L	cleavage and polyadenylation specific factor 3-like
241748_x_at	3.09e-08	9.69e-10	27	12.6649	1.645	DGCR14	DiGeorge syndrome critical region gene 14
207382_at	3.11e-08	9.75e-10	26.9	12.6584	0.377049	TP63	tumor protein p63
224165_s_at	3.12e-08	9.8e-10	-26.9	12.6531	-0.439635	IQCH	IQ motif containing H
215843_s_at	3.12e-08	9.8e-10	26.9	12.6528	0.385171	TLL2	tolloid-like 2
216055_at	3.14e-08	9.87e-10	-26.9	12.6446	-0.284188	PDGFB	platelet-derived growth factor beta polypeptide
1559766_at	3.15e-08	9.9e-10	-26.9	12.641	-0.326147	ALDH1L1-AS2	ALDH1L1 antisense RNA 2
1570511_at	3.16e-08	9.93e-10	26.9	12.6378	0.760014	ARHGEF10L	Rho guanine nucleotide exchange factor (GEF) 10-like
234436_x_at	3.17e-08	9.98e-10	26.9	12.6322	0.297343	OBP2A	odorant binding protein 2A
239953_at	3.18e-08	1e-09	-26.9	12.6275	-0.318644
219236_at	3.18e-08	1e-09	26.9	12.6271	0.283505	PAQR6	progestin and adipoQ receptor family member VI
204696_s_at	3.22e-08	1.02e-09	26.8	12.6139	1.44267	CDC25A	cell division cycle 25A
1570242_x_at	3.24e-08	1.02e-09	-26.8	12.6083	-0.54044	SPATA21	spermatogenesis associated 21
1562036_at	3.25e-08	1.03e-09	-26.8	12.603	-0.461076
241629_at	3.26e-08	1.03e-09	26.8	12.5976	0.839204
243432_at	3.28e-08	1.04e-09	26.8	12.5919	0.349114	CHL1-AS2	CHL1 antisense RNA 2
239340_at	3.28e-08	1.04e-09	26.8	12.5904	0.454284
1565732_at	3.29e-08	1.04e-09	-26.7	12.5865	-0.514287
238628_s_at	3.3e-08	1.04e-09	-26.7	12.584	-0.723253	TRAPPC2L	trafficking protein particle complex 2-like
243587_x_at	3.31e-08	1.05e-09	26.7	12.5794	0.329224
1560536_at	3.32e-08	1.05e-09	-26.7	12.5736	-0.26874
231465_at	3.32e-08	1.05e-09	26.7	12.573	0.497717
1569008_at	3.33e-08	1.06e-09	-26.7	12.5714	-0.316206	LOC100132249	uncharacterized LOC100132249
213336_at	3.33e-08	1.06e-09	-26.7	12.5711	-0.882331	BAZ1B	bromodomain adjacent to zinc finger domain, 1B
219963_at	3.33e-08	1.06e-09	-26.7	12.5706	-0.293832	DUSP13	dual specificity phosphatase 13
205598_at	3.33e-08	1.06e-09	-26.7	12.5694	-0.273285	TRAIP	TRAF interacting protein
238882_at	3.33e-08	1.06e-09	26.7	12.5694	0.681292
239641_at	3.33e-08	1.06e-09	-26.7	12.5678	-0.595399	FLI1-AS1	FLI1 antisense RNA 1
232495_x_at	3.33e-08	1.06e-09	-26.7	12.5665	-0.269227
237628_at	3.33e-08	1.06e-09	26.7	12.5648	0.828595
231083_at	3.35e-08	1.07e-09	-26.7	12.5596	-0.321339	ETV5	ets variant 5
221784_at	3.35e-08	1.07e-09	-26.7	12.5573	-1.05516	WIZ	widely interspaced zinc finger motifs
231244_at	3.38e-08	1.08e-09	26.6	12.5483	0.338095
1557226_a_at	3.38e-08	1.08e-09	26.6	12.5478	0.295374	ASPG	asparaginase homolog (S. cerevisiae)
223514_at	3.38e-08	1.08e-09	-26.6	12.547	-1.29906	CARD11	caspase recruitment domain family, member 11
1557943_at	3.38e-08	1.08e-09	-26.6	12.5467	-0.849123	CNP	2',3'-cyclic nucleotide 3' phosphodiesterase
1557827_at	3.4e-08	1.09e-09	26.6	12.54	0.352538	DNAJC9-AS1	DNAJC9 antisense RNA 1
239272_at	3.41e-08	1.09e-09	-26.6	12.5359	-0.518446	MMP28	matrix metallopeptidase 28
230215_at	3.41e-08	1.09e-09	-26.6	12.5336	-0.278138	SEC61A2	Sec61 alpha 2 subunit (S. cerevisiae)
1563472_at	3.43e-08	1.1e-09	26.6	12.5282	0.319528
203877_at	3.43e-08	1.1e-09	26.6	12.5266	0.457275	MMP11	matrix metallopeptidase 11 (stromelysin 3)
237598_at	3.45e-08	1.11e-09	26.6	12.5196	0.451813	SEC1P	secretory blood group 1, pseudogene
1556449_at	3.45e-08	1.11e-09	26.6	12.5189	0.609923
1566500_at	3.47e-08	1.11e-09	26.5	12.5129	0.307637
1552596_at	3.49e-08	1.12e-09	26.5	12.5064	0.274819	GAS2L2	growth arrest-specific 2 like 2
231661_at	3.49e-08	1.12e-09	-26.5	12.5048	-0.274387	REG3G	regenerating islet-derived 3 gamma
222083_at	3.52e-08	1.13e-09	26.5	12.4935	0.352758	GLYAT	glycine-N-acyltransferase
240888_at	3.53e-08	1.14e-09	26.5	12.4899	0.308584
240925_at	3.53e-08	1.14e-09	26.5	12.4895	0.307867
1569660_at	3.53e-08	1.14e-09	26.5	12.4892	0.405188	PP13439	uncharacterized LOC100128046
221982_x_at	3.54e-08	1.14e-09	26.5	12.4867	0.341608	LAGE3	L antigen family, member 3
210271_at	3.54e-08	1.14e-09	-26.5	12.486	-0.279595	NEUROD2	neuronal differentiation 2
232560_at	3.54e-08	1.14e-09	-26.5	12.4845	-0.290693	UROS	uroporphyrinogen III synthase
237150_at	3.55e-08	1.15e-09	26.4	12.4805	0.449899
1562939_at	3.57e-08	1.15e-09	26.4	12.4739	0.30146	LRRC16A	leucine rich repeat containing 16A
236448_at	3.57e-08	1.15e-09	26.4	12.4735	0.292394	UNC5A	unc-5 homolog A (C. elegans)
244284_at	3.57e-08	1.16e-09	-26.4	12.4715	-0.447006
208199_s_at	3.57e-08	1.16e-09	26.4	12.4713	0.749922	ZBTB14	zinc finger and BTB domain containing 14
205293_x_at	3.58e-08	1.16e-09	26.4	12.4697	3.51153	BAIAP2	BAI1-associated protein 2
228800_x_at	3.59e-08	1.16e-09	-26.4	12.4649	-1.10746	AURKAIP1	aurora kinase A interacting protein 1
233089_at	3.61e-08	1.17e-09	26.4	12.4583	0.831441	QRSL1	glutaminyl-tRNA synthase (glutamine-hydrolyzing)-like 1
1557632_at	3.61e-08	1.17e-09	-26.4	12.4571	-0.766742
217612_at	3.63e-08	1.18e-09	26.4	12.4524	0.705778	TIMM50	translocase of inner mitochondrial membrane 50 homolog (S. cerevisiae)
242434_at	3.65e-08	1.18e-09	-26.3	12.4445	-1.10114
1558120_at	3.65e-08	1.19e-09	26.3	12.4429	0.380655	DDX3X	DEAD (Asp-Glu-Ala-Asp) box polypeptide 3, X-linked
1553249_at	3.66e-08	1.19e-09	-26.3	12.4394	-0.440406	SMC1B	structural maintenance of chromosomes 1B
229988_at	3.68e-08	1.2e-09	-26.3	12.4329	-0.239574
210272_at	3.68e-08	1.2e-09	-26.3	12.432	-0.34062	CYP2B7P1	cytochrome P450, family 2, subfamily B, polypeptide 7 pseudogene 1
231517_at	3.68e-08	1.2e-09	26.3	12.4313	0.472871	ZYG11A	zyg-11 family member A, cell cycle regulator
241427_x_at	3.68e-08	1.2e-09	26.3	12.4311	0.381543
241187_at	3.69e-08	1.2e-09	26.3	12.4289	0.36319
1569502_s_at	3.7e-08	1.21e-09	26.3	12.4253	1.12473	TP73-AS1	TP73 antisense RNA 1
231957_s_at	3.7e-08	1.21e-09	-26.3	12.425	-0.274802	DPP9	dipeptidyl-peptidase 9
238088_at	3.7e-08	1.21e-09	26.3	12.4244	0.35401
239074_at	3.7e-08	1.21e-09	-26.3	12.4233	-0.354985	GRAPL	GRB2-related adaptor protein-like
237965_at	3.72e-08	1.22e-09	-26.3	12.4165	-0.254394
1556677_at	3.73e-08	1.22e-09	26.3	12.4122	0.333865
1552960_at	3.74e-08	1.22e-09	-26.3	12.4099	-0.328256	LRRC15	leucine rich repeat containing 15
1563946_at	3.76e-08	1.23e-09	26.2	12.4039	0.279274
213635_s_at	3.77e-08	1.24e-09	-26.2	12.399	-0.318824	SAFB	scaffold attachment factor B
216738_at	3.77e-08	1.24e-09	26.2	12.3977	0.344978
207050_at	3.79e-08	1.24e-09	26.2	12.3916	0.806585	CACNA2D1	calcium channel, voltage-dependent, alpha 2/delta subunit 1
1559523_at	3.82e-08	1.25e-09	-26.2	12.3829	-0.732053
206915_at	3.82e-08	1.25e-09	26.2	12.3828	0.427837	NKX2-2	NK2 homeobox 2
1565002_at	3.82e-08	1.26e-09	26.2	12.38	0.303639
239673_at	3.82e-08	1.26e-09	26.2	12.3792	0.43667
234963_s_at	3.82e-08	1.26e-09	-26.2	12.379	-0.440125	FA2H	fatty acid 2-hydroxylase
227602_at	3.83e-08	1.26e-09	26.2	12.3776	0.2362	RAB7A	RAB7A, member RAS oncogene family
1563142_at	3.83e-08	1.26e-09	26.2	12.3764	0.277731
211588_s_at	3.83e-08	1.26e-09	-26.2	12.3762	-0.855416	LOC652346///PML	probable transcription factor PML-like///promyelocytic leukemia
244244_at	3.83e-08	1.26e-09	26.2	12.3747	0.351571	CD300LG	CD300 molecule-like family member g
232680_at	3.83e-08	1.26e-09	26.2	12.373	0.427438	HDGFL1	hepatoma derived growth factor-like 1
1560553_at	3.84e-08	1.27e-09	26.1	12.3706	0.361592	TIAF1	TGFB1-induced anti-apoptotic factor 1
231682_at	3.84e-08	1.27e-09	-26.1	12.3689	-0.360006
210795_s_at	3.85e-08	1.27e-09	26.1	12.3657	0.297168	MEG3	maternally expressed 3 (non-protein coding)
225393_at	3.86e-08	1.28e-09	26.1	12.3633	1.23121	GATAD2B	GATA zinc finger domain containing 2B
205038_at	3.87e-08	1.28e-09	-26.1	12.3612	-1.40209	IKZF1	IKAROS family zinc finger 1 (Ikaros)
230246_at	3.88e-08	1.28e-09	26.1	12.3576	0.264618	PLAC9	placenta-specific 9
1570354_s_at	3.89e-08	1.29e-09	26.1	12.3537	0.526695	ZNF169	zinc finger protein 169
221849_s_at	3.9e-08	1.29e-09	26.1	12.3509	0.926948	DCAF15	DDB1 and CUL4 associated factor 15
221240_s_at	3.9e-08	1.29e-09	26.1	12.3483	1.81265	B3GNT4	UDP-GlcNAc:betaGal beta-1,3-N-acetylglucosaminyltransferase 4
233266_at	3.9e-08	1.29e-09	26.1	12.3483	0.322698
244135_at	3.9e-08	1.3e-09	26.1	12.3466	0.337798
234431_at	3.91e-08	1.3e-09	26.1	12.3436	1.13359	GSN	gelsolin
1553460_at	3.93e-08	1.3e-09	-26.1	12.3391	-0.358934	C2orf61	chromosome 2 open reading frame 61
238286_at	3.94e-08	1.31e-09	26	12.3342	0.388514	SPG7	spastic paraplegia 7 (pure and complicated autosomal recessive)
239972_at	3.95e-08	1.31e-09	26	12.3309	0.320997
205956_x_at	3.95e-08	1.31e-09	26	12.3309	0.756512	PSMC3IP	PSMC3 interacting protein
216382_s_at	3.95e-08	1.31e-09	26	12.3305	0.256473	KMT2D	lysine (K)-specific methyltransferase 2D
206170_at	3.95e-08	1.32e-09	-26	12.3285	-0.36933	ADRB2	adrenoceptor beta 2, surface
222022_at	3.96e-08	1.32e-09	-26	12.3273	-0.83708	DTX3	deltex homolog 3 (Drosophila)
1560011_at	3.96e-08	1.32e-09	-26	12.3267	-0.439892
207393_at	3.99e-08	1.33e-09	-26	12.3177	-0.353903	HCRTR2	hypocretin (orexin) receptor 2
210132_at	4.02e-08	1.34e-09	26	12.3079	1.95872	EFNA3	ephrin-A3
1564773_x_at	4.04e-08	1.35e-09	26	12.3025	0.703753
244556_at	4.04e-08	1.35e-09	26	12.3012	0.310657	LCP2	lymphocyte cytosolic protein 2 (SH2 domain containing leukocyte protein of 76kDa)
224059_s_at	4.07e-08	1.36e-09	25.9	12.2938	0.714585	NUMBL	numb homolog (Drosophila)-like
1556269_at	4.08e-08	1.36e-09	-25.9	12.2901	-0.488101	MYT1	myelin transcription factor 1
204592_at	4.08e-08	1.37e-09	25.9	12.2884	0.822714	DLG4	discs, large homolog 4 (Drosophila)
1557521_a_at	4.09e-08	1.37e-09	25.9	12.2853	0.387776
1554766_s_at	4.09e-08	1.37e-09	25.9	12.285	0.404504
57739_at	4.1e-08	1.37e-09	25.9	12.2824	0.617545	DND1	dead end homolog 1 (zebrafish)
1562930_at	4.12e-08	1.38e-09	-25.9	12.2758	-0.290615	SRRM2-AS1	SRRM2 antisense RNA 1
210601_at	4.13e-08	1.39e-09	25.9	12.2729	0.418476	CDH6	cadherin 6, type 2, K-cadherin (fetal kidney)
1567023_at	4.14e-08	1.39e-09	25.9	12.2687	0.32181	OR5AK4P	olfactory receptor, family 5, subfamily AK, member 4 pseudogene
235933_at	4.14e-08	1.39e-09	-25.9	12.2684	-0.321874	FLJ32154	uncharacterized protein FLJ32154
237749_at	4.14e-08	1.39e-09	-25.9	12.267	-0.289428
237605_at	4.15e-08	1.4e-09	-25.9	12.2648	-0.515476
238125_at	4.15e-08	1.4e-09	25.9	12.2642	1.09997	ADAMTS16	ADAM metallopeptidase with thrombospondin type 1 motif, 16
210479_s_at	4.15e-08	1.4e-09	-25.9	12.2634	-1.62976	RORA	RAR-related orphan receptor A
232904_at	4.15e-08	1.4e-09	25.8	12.2622	0.329651	SLC7A14	solute carrier family 7 (orphan transporter), member 14
1563157_at	4.17e-08	1.41e-09	25.8	12.2561	0.286785
206289_at	4.18e-08	1.41e-09	25.8	12.253	1.50395	HOXA4	homeobox A4
235873_at	4.2e-08	1.42e-09	25.8	12.2467	0.342404
231471_at	4.2e-08	1.42e-09	25.8	12.2461	0.251784
207880_at	4.22e-08	1.42e-09	-25.8	12.2426	-0.274531	ADAM11	ADAM metallopeptidase domain 11
232462_s_at	4.23e-08	1.43e-09	-25.8	12.2375	-0.729069	A1BG-AS1	A1BG antisense RNA 1
1553629_a_at	4.23e-08	1.43e-09	25.8	12.237	0.31823	FAM71B	family with sequence similarity 71, member B
230524_at	4.26e-08	1.44e-09	25.8	12.2282	0.514699	MPI	mannose phosphate isomerase
221010_s_at	4.26e-08	1.44e-09	25.8	12.2281	1.28389	SIRT5	sirtuin 5
1553740_a_at	4.26e-08	1.44e-09	-25.8	12.227	-0.277568	IRAK2	interleukin-1 receptor-associated kinase 2
231156_at	4.27e-08	1.45e-09	25.8	12.2262	0.367836
236139_at	4.28e-08	1.45e-09	25.7	12.2231	0.321524
218634_at	4.29e-08	1.46e-09	25.7	12.2182	0.601081	PHLDA3	pleckstrin homology-like domain, family A, member 3
1556333_at	4.3e-08	1.46e-09	25.7	12.2148	0.456783
1555591_at	4.35e-08	1.48e-09	25.7	12.2034	0.679936	PIF1	PIF1 5'-to-3' DNA helicase
237027_at	4.35e-08	1.48e-09	25.7	12.2024	0.299337
207631_at	4.35e-08	1.48e-09	25.7	12.2016	0.856812	NBR2	neighbor of BRCA1 gene 2 (non-protein coding)
201006_at	4.35e-08	1.48e-09	25.7	12.2002	0.664895	PRDX2	peroxiredoxin 2
222009_at	4.35e-08	1.48e-09	25.7	12.1993	0.383432	CEMP1	cementum protein 1
238508_at	4.35e-08	1.48e-09	25.7	12.199	0.248338	DBF4B	DBF4 homolog B (S. cerevisiae)
1552895_a_at	4.35e-08	1.48e-09	25.7	12.1982	0.653401	ANKRD30BP2	ankyrin repeat domain 30B pseudogene 2
1553556_at	4.39e-08	1.5e-09	-25.6	12.1886	-0.350631	TAS2R40	taste receptor, type 2, member 40
216387_x_at	4.39e-08	1.5e-09	25.6	12.1882	1.39519
1555299_s_at	4.4e-08	1.5e-09	-25.6	12.1857	-0.430798	ERVW-1	endogenous retrovirus group W, member 1
216744_at	4.4e-08	1.5e-09	-25.6	12.1844	-0.465778
211438_at	4.4e-08	1.5e-09	25.6	12.1841	0.300978	TRHR	thyrotropin-releasing hormone receptor
1556236_at	4.4e-08	1.51e-09	-25.6	12.1817	-0.536132
211076_x_at	4.42e-08	1.51e-09	-25.6	12.1781	-0.670748	ATN1	atrophin 1
1555719_a_at	4.45e-08	1.52e-09	25.6	12.168	0.709939	MAATS1	MYCBP-associated, testis expressed 1
232220_at	4.46e-08	1.53e-09	-25.6	12.1672	-0.689036	S100A7A	S100 calcium binding protein A7A
216994_s_at	4.46e-08	1.53e-09	25.6	12.165	0.288351	RUNX2	runt-related transcription factor 2
234768_at	4.47e-08	1.53e-09	25.6	12.1624	0.373252
208601_s_at	4.47e-08	1.53e-09	25.6	12.1609	0.530766	TUBB1	tubulin, beta 1 class VI
236490_at	4.47e-08	1.53e-09	25.6	12.1605	0.235885	NEDD4L	neural precursor cell expressed, developmentally down-regulated 4-like, E3 ubiquitin protein ligase
221885_at	4.48e-08	1.54e-09	25.6	12.1582	1.49997	DENND2A	DENN/MADD domain containing 2A
1554582_a_at	4.49e-08	1.54e-09	25.6	12.1558	0.48078	METTL20	methyltransferase like 20
1554657_a_at	4.5e-08	1.55e-09	25.5	12.1514	0.482162	C20orf26	chromosome 20 open reading frame 26
233941_at	4.5e-08	1.55e-09	-25.5	12.1511	-0.240263	C14orf166B	chromosome 14 open reading frame 166B
231884_at	4.5e-08	1.55e-09	-25.5	12.15	-0.551919	CNTROB	centrobin, centrosomal BRCA2 interacting protein
209415_at	4.5e-08	1.55e-09	25.5	12.1497	1.52476	FZR1	fizzy/cell division cycle 20 related 1 (Drosophila)
224431_s_at	4.5e-08	1.55e-09	25.5	12.1495	1.00707	SUV420H2	suppressor of variegation 4-20 homolog 2 (Drosophila)
226253_at	4.56e-08	1.57e-09	25.5	12.1338	0.681707	LRRC45	leucine rich repeat containing 45
233309_at	4.58e-08	1.58e-09	-25.5	12.129	-0.313958
1554578_at	4.59e-08	1.58e-09	25.5	12.1256	0.256839	ZNF70	zinc finger protein 70
1552315_at	4.61e-08	1.59e-09	-25.5	12.1212	-0.301246	GIMAP1	GTPase, IMAP family member 1
1564414_a_at	4.61e-08	1.59e-09	-25.5	12.1203	-0.427703	PNLDC1	poly(A)-specific ribonuclease (PARN)-like domain containing 1
239578_at	4.62e-08	1.59e-09	25.5	12.1186	0.300099
235359_at	4.62e-08	1.6e-09	25.5	12.1177	0.915436	LRRC33	leucine rich repeat containing 33
1570106_at	4.63e-08	1.6e-09	25.5	12.1151	0.329691
234190_at	4.65e-08	1.61e-09	-25.4	12.1094	-0.495172
211011_at	4.66e-08	1.61e-09	25.4	12.1062	0.395447	COL19A1	collagen, type XIX, alpha 1
217646_at	4.67e-08	1.62e-09	25.4	12.102	0.743761	SURF1	surfeit 1
206131_at	4.68e-08	1.62e-09	25.4	12.0995	0.886305	CLPS	colipase, pancreatic
216881_x_at	4.73e-08	1.64e-09	25.4	12.0885	0.716392	PRB4	proline-rich protein BstNI subfamily 4
205101_at	4.73e-08	1.64e-09	-25.4	12.088	-0.5086	CIITA	class II, major histocompatibility complex, transactivator
234588_at	4.73e-08	1.64e-09	25.4	12.0859	0.39732
207300_s_at	4.73e-08	1.64e-09	25.4	12.0853	0.422837	F7	coagulation factor VII (serum prothrombin conversion accelerator)
210421_s_at	4.74e-08	1.65e-09	-25.4	12.084	-0.450532	SLC24A1	solute carrier family 24 (sodium/potassium/calcium exchanger), member 1
241006_at	4.75e-08	1.65e-09	-25.4	12.0803	-0.55817
228659_at	4.76e-08	1.66e-09	-25.4	12.0776	-0.382158
244489_at	4.8e-08	1.67e-09	25.3	12.0683	0.877532	LOC100129268	uncharacterized LOC100129268
211838_x_at	4.82e-08	1.68e-09	25.3	12.0634	0.682325	PCDHA5	protocadherin alpha 5
232822_x_at	4.84e-08	1.69e-09	25.3	12.058	0.337744	LINC00629	long intergenic non-protein coding RNA 629
1555503_a_at	4.85e-08	1.69e-09	25.3	12.0536	0.356037	TMCC2	transmembrane and coiled-coil domain family 2
1552758_at	4.85e-08	1.69e-09	25.3	12.0533	0.346861	HDAC9	histone deacetylase 9
239105_at	4.85e-08	1.69e-09	-25.3	12.0524	-0.644282
244064_at	4.86e-08	1.7e-09	-25.3	12.0494	-0.482175
1564960_at	4.89e-08	1.71e-09	25.3	12.0439	0.289612	KRTAP7-1	keratin associated protein 7-1 (gene/pseudogene)
1561905_at	4.89e-08	1.71e-09	-25.3	12.0418	-0.643084
1556205_at	4.9e-08	1.71e-09	-25.3	12.0402	-0.232592
238791_at	4.9e-08	1.71e-09	25.3	12.0397	0.611842	ZNF100	zinc finger protein 100
1552509_a_at	4.91e-08	1.72e-09	25.2	12.0362	0.29846	CD300LG	CD300 molecule-like family member g
234620_at	4.92e-08	1.72e-09	25.2	12.033	0.579812	TPM3P9///TPM3	tropomyosin 3 pseudogene 9///tropomyosin 3
237451_x_at	4.92e-08	1.73e-09	25.2	12.0323	0.391333
1566927_at	4.93e-08	1.73e-09	25.2	12.0291	0.315635	LINC00527	long intergenic non-protein coding RNA 527
235417_at	4.95e-08	1.74e-09	-25.2	12.0258	-0.662053	SPOCD1	SPOC domain containing 1
223889_at	4.95e-08	1.74e-09	-25.2	12.0239	-0.346549
210326_at	4.95e-08	1.74e-09	-25.2	12.0228	-0.332234	AGXT	alanine-glyoxylate aminotransferase
1569321_at	4.95e-08	1.74e-09	-25.2	12.0227	-0.283229
239571_at	4.97e-08	1.75e-09	25.2	12.0175	0.304979
216924_s_at	5e-08	1.76e-09	-25.2	12.0111	-0.321736	DRD2	dopamine receptor D2
230020_at	5.03e-08	1.77e-09	-25.2	12.004	-2.12559	NAA38	N(alpha)-acetyltransferase 38, NatC auxiliary subunit
219652_s_at	5.04e-08	1.77e-09	25.2	12.002	0.328461	CXorf36	chromosome X open reading frame 36
1565454_at	5.05e-08	1.78e-09	-25.1	11.9995	-0.243969	XAGE-4	XAGE-4 protein
238016_s_at	5.06e-08	1.78e-09	25.1	11.9958	0.515146
237453_at	5.06e-08	1.79e-09	-25.1	11.9942	-0.337458	ZNF529	zinc finger protein 529
220598_at	5.07e-08	1.79e-09	-25.1	11.9921	-0.328946	CARD14	caspase recruitment domain family, member 14
220284_at	5.09e-08	1.8e-09	25.1	11.9876	0.355501	DKKL1	dickkopf-like 1
233696_at	5.09e-08	1.8e-09	-25.1	11.9866	-0.301382
231596_at	5.09e-08	1.8e-09	-25.1	11.9858	-0.25791
1552459_a_at	5.1e-08	1.8e-09	25.1	11.9843	0.301363	MBD3L1	methyl-CpG binding domain protein 3-like 1
234485_at	5.12e-08	1.81e-09	-25.1	11.9791	-0.41408	EIF3L	eukaryotic translation initiation factor 3, subunit L
1556905_at	5.13e-08	1.81e-09	-25.1	11.9765	-0.545478	ZNF577	zinc finger protein 577
243239_at	5.15e-08	1.82e-09	25.1	11.971	0.329508	SAMM50	sorting and assembly machinery component 50 homolog (S. cerevisiae)
244063_at	5.15e-08	1.82e-09	-25.1	11.9706	-0.426168	BTN2A1	butyrophilin, subfamily 2, member A1
220332_at	5.15e-08	1.83e-09	25.1	11.9699	0.405738	CLDN16	claudin 16
1556244_s_at	5.16e-08	1.83e-09	25.1	11.9673	0.473947	LOC375196	uncharacterized LOC375196
1557919_a_at	5.16e-08	1.83e-09	-25.1	11.9672	-0.296355
1565728_at	5.16e-08	1.83e-09	25.1	11.9671	0.344189	LOC284630	uncharacterized LOC284630
231400_s_at	5.16e-08	1.83e-09	25.1	11.9667	0.32244	TIMM22	translocase of inner mitochondrial membrane 22 homolog (yeast)
232335_at	5.17e-08	1.84e-09	25	11.9624	0.335051	LOC100508120	uncharacterized LOC100508120
229161_at	5.17e-08	1.84e-09	-25	11.962	-0.689308	IQCG	IQ motif containing G
244129_at	5.17e-08	1.84e-09	-25	11.9615	-0.604794
1569293_x_at	5.19e-08	1.85e-09	-25	11.9573	-0.390814	CROCCP2	ciliary rootlet coiled-coil, rootletin pseudogene 2
216849_at	5.2e-08	1.85e-09	25	11.955	0.693452
230318_at	5.2e-08	1.85e-09	-25	11.9534	-0.286236	SERPINA1	serpin peptidase inhibitor, clade A (alpha-1 antiproteinase, antitrypsin), member 1
229755_x_at	5.2e-08	1.86e-09	-25	11.9525	-0.295533	DLL3	delta-like 3 (Drosophila)
244800_x_at	5.22e-08	1.86e-09	-25	11.9486	-0.429329
1564281_at	5.22e-08	1.86e-09	25	11.9477	0.251272	LINC00491	long intergenic non-protein coding RNA 491
1567060_at	5.25e-08	1.87e-09	25	11.9408	0.304684	OR8G1	olfactory receptor, family 8, subfamily G, member 1
207748_at	5.25e-08	1.88e-09	25	11.9397	0.516046
1494_f_at	5.27e-08	1.88e-09	25	11.9351	0.457448	CYP2A6	cytochrome P450, family 2, subfamily A, polypeptide 6
231524_at	5.27e-08	1.89e-09	25	11.9348	0.283997
210328_at	5.28e-08	1.89e-09	25	11.933	0.323534	GNMT	glycine N-methyltransferase
233583_at	5.28e-08	1.89e-09	25	11.9328	0.363784
242999_at	5.28e-08	1.89e-09	25	11.9306	0.449932	ARHGEF7	Rho guanine nucleotide exchange factor (GEF) 7
221053_s_at	5.29e-08	1.89e-09	-25	11.9293	-0.599932	TDRKH	tudor and KH domain containing
1555809_at	5.29e-08	1.89e-09	25	11.9291	0.440595	CRISPLD2	cysteine-rich secretory protein LCCL domain containing 2
221118_at	5.29e-08	1.9e-09	25	11.927	0.432387	PKD2L2	polycystic kidney disease 2-like 2
220157_x_at	5.32e-08	1.91e-09	24.9	11.9207	1.24985	PLEKHA8P1	pleckstrin homology domain containing, family A member 8 pseudogene 1
222278_at	5.32e-08	1.91e-09	24.9	11.9206	0.258387
215846_at	5.34e-08	1.92e-09	24.9	11.9161	0.460636
234466_at	5.34e-08	1.92e-09	24.9	11.9144	0.587304	FAM20C	family with sequence similarity 20, member C
230181_at	5.37e-08	1.93e-09	24.9	11.9078	0.438427	PQLC1	PQ loop repeat containing 1
1570182_at	5.37e-08	1.93e-09	-24.9	11.9074	-0.2882
235149_at	5.38e-08	1.94e-09	-24.9	11.9052	-0.285136	PGM2L1	phosphoglucomutase 2-like 1
232288_at	5.38e-08	1.94e-09	-24.9	11.9042	-0.430549	PDXDC2P///PDXDC1	pyridoxal-dependent decarboxylase domain containing 2, pseudogene///pyridoxal-dependent decarboxylase domain containing 1
202549_at	5.38e-08	1.94e-09	-24.9	11.9041	-0.52842	VAPB	VAMP (vesicle-associated membrane protein)-associated protein B and C
239504_at	5.38e-08	1.94e-09	24.9	11.9028	0.469909
234070_at	5.39e-08	1.95e-09	24.9	11.9003	0.30117
1561509_at	5.41e-08	1.95e-09	-24.9	11.8961	-0.316056
237021_at	5.41e-08	1.95e-09	-24.9	11.8951	-0.306469	CCDC41-AS1	CCDC41 antisense RNA 1 (head to head)
206362_x_at	5.43e-08	1.96e-09	-24.9	11.891	-0.393731	MAP3K10	mitogen-activated protein kinase kinase kinase 10
234736_at	5.44e-08	1.97e-09	24.9	11.8883	0.304401	JPH3	junctophilin 3
233693_at	5.44e-08	1.97e-09	24.8	11.8873	0.378018	STPG1	sperm-tail PG-rich repeat containing 1
236541_at	5.44e-08	1.97e-09	24.8	11.8868	1.29867
208128_x_at	5.46e-08	1.97e-09	24.8	11.8839	0.260737	KIF25	kinesin family member 25
1553397_at	5.48e-08	1.98e-09	-24.8	11.8788	-0.245023	CCDC13	coiled-coil domain containing 13
204380_s_at	5.5e-08	1.99e-09	-24.8	11.8748	-0.331346	FGFR3	fibroblast growth factor receptor 3
244759_x_at	5.5e-08	2e-09	-24.8	11.8726	-0.2962	RNF207	ring finger protein 207
238246_at	5.53e-08	2.01e-09	24.8	11.8666	0.697149	MTL5	metallothionein-like 5, testis-specific (tesmin)
232120_at	5.55e-08	2.01e-09	24.8	11.8623	0.398374
211469_s_at	5.55e-08	2.02e-09	-24.8	11.8611	-0.332741	CXCR6	chemokine (C-X-C motif) receptor 6
207389_at	5.56e-08	2.02e-09	24.8	11.8594	0.49604	GP1BA	glycoprotein Ib (platelet), alpha polypeptide
233064_at	5.56e-08	2.02e-09	24.8	11.8587	0.362903	ZFR2	zinc finger RNA binding protein 2
231548_at	5.56e-08	2.02e-09	24.8	11.8585	1.83767	FOXO3	forkhead box O3
242863_at	5.56e-08	2.02e-09	24.8	11.8579	0.272978
226983_at	5.57e-08	2.03e-09	24.8	11.8554	0.289452	ZNF777	zinc finger protein 777
233043_at	5.57e-08	2.03e-09	-24.8	11.8544	-0.280742	LOC221814	uncharacterized LOC221814
218267_at	5.57e-08	2.03e-09	24.8	11.8532	1.14574	CINP	cyclin-dependent kinase 2 interacting protein
1553059_at	5.58e-08	2.03e-09	24.8	11.8515	0.36311	PGLYRP3	peptidoglycan recognition protein 3
228689_at	5.58e-08	2.04e-09	-24.8	11.8507	-1.04573	NDUFA11	NADH dehydrogenase (ubiquinone) 1 alpha subcomplex, 11, 14.7kDa
232324_x_at	5.58e-08	2.04e-09	24.8	11.8503	1.82394
236753_at	5.58e-08	2.04e-09	24.8	11.8499	0.352174	LINC00689	long intergenic non-protein coding RNA 689
238753_at	5.58e-08	2.04e-09	-24.8	11.8498	-1.44384	NCS1	neuronal calcium sensor 1
244362_at	5.58e-08	2.04e-09	24.8	11.8493	0.217279
216105_x_at	5.59e-08	2.04e-09	24.7	11.846	0.556952	PPP2R4	protein phosphatase 2A activator, regulatory subunit 4
[truncated: 52,676 more rows]

## Sheet: GSE26787 - Fertile vs IF
ID	adj.P.Val	P.Value	t	B	logFC (Fertile vs IF)	Gene.symbol	Gene.title
220962_s_at	6.74e-14	1.23e-18	294	31.2122	2.47192	PADI1	peptidyl arginine deiminase, type I
214968_at	9.54e-14	5.53e-18	247	30.4494	2.023	DDX51	DEAD (Asp-Glu-Ala-Asp) box polypeptide 51
236744_at	9.54e-14	6.8e-18	-241	30.3326	-1.66005	PHPT1	phosphohistidine phosphatase 1
244478_at	9.54e-14	6.98e-18	240	30.3174	2.24316	LRRC37A3	leucine rich repeat containing 37, member A3
228219_s_at	1.05e-13	1.24e-17	-225	29.9762	-1.85271	UPB1	ureidopropionase, beta
215583_at	1.05e-13	1.32e-17	223	29.9397	1.60077	TMEM63A	transmembrane protein 63A
226964_at	1.05e-13	1.43e-17	-221	29.8922	-1.84095
1552631_a_at	1.05e-13	1.56e-17	-219	29.8363	-1.61842	MAP3K6	mitogen-activated protein kinase kinase kinase 6
205050_s_at	1.05e-13	1.73e-17	-216	29.7708	-1.57061	MAPK8IP2	mitogen-activated protein kinase 8 interacting protein 2
234761_at	1.24e-13	2.48e-17	208	29.5408	1.5256
213837_at	1.24e-13	2.49e-17	208	29.5377	1.55969	L3MBTL1	l(3)mbt-like 1 (Drosophila)
215798_at	1.55e-13	3.39e-17	200	29.3339	1.60871	ALDH1L1	aldehyde dehydrogenase 1 family, member L1
1558304_s_at	2.9e-13	6.9e-17	185	28.8417	1.41941	TSEN54	tRNA splicing endonuclease 54 homolog (S. cerevisiae)
244012_x_at	3.07e-13	7.87e-17	-182	28.7472	-2.0657	XPO1	exportin 1 (CRM1 homolog, yeast)
232147_at	3.09e-13	8.47e-17	180	28.6942	1.46402	SLX4	SLX4 structure-specific endonuclease subunit
220246_at	3.26e-13	9.95e-17	177	28.5766	1.34853	CAMK1D	calcium/calmodulin-dependent protein kinase ID
1554905_x_at	3.26e-13	1.05e-16	176	28.5353	1.41824	FRMD8	FERM domain containing 8
244280_at	3.26e-13	1.07e-16	-175	28.5196	-1.20877	LOC100507254	uncharacterized LOC100507254
1568929_at	3.31e-13	1.15e-16	-174	28.4687	-1.30946	LOC100128343	uncharacterized LOC100128343
1564603_at	3.41e-13	1.25e-16	-172	28.4083	-1.26526	NUTM1	NUT midline carcinoma, family member 1
236599_at	3.75e-13	1.44e-16	-170	28.2999	-1.42889
211332_x_at	4.01e-13	1.61e-16	167	28.2137	1.12694	HFE	hemochromatosis
232988_at	4.04e-13	1.7e-16	-166	28.1748	-1.24369	GSE1	Gse1 coiled-coil protein
1559502_s_at	4.09e-13	1.81e-16	165	28.1247	1.24929	LRRC25	leucine rich repeat containing 25
211590_x_at	4.09e-13	1.87e-16	-165	28.1008	-1.08981	TBXA2R	thromboxane A2 receptor
239047_at	4.23e-13	2.01e-16	-163	28.0439	-1.17195	FAM122C	family with sequence similarity 122C
240797_at	4.8e-13	2.37e-16	-160	27.9167	-1.4728	PERP	PERP, TP53 apoptosis effector
230579_at	5.4e-13	2.79e-16	-157	27.7874	-1.79593	LOC728705	uncharacterized LOC728705
1569614_s_at	5.4e-13	2.86e-16	-157	27.7676	-1.26213	LCN8	lipocalin 8
227783_at	6.86e-13	3.79e-16	152	27.5427	1.46847	CCDC57	coiled-coil domain containing 57
227071_at	6.86e-13	3.94e-16	151	27.5118	1.1481	ZNF414	zinc finger protein 414
1554173_at	6.86e-13	4.02e-16	-151	27.4956	-1.12669	CD300LB	CD300 molecule-like family member b
1558517_s_at	7.19e-13	4.41e-16	-149	27.42	-2.39431	LRRC8C	leucine rich repeat containing 8 family, member C
204152_s_at	7.19e-13	4.72e-16	148	27.3633	1.03021	MFNG	MFNG O-fucosylpeptide 3-beta-N-acetylglucosaminyltransferase
230155_x_at	7.19e-13	4.73e-16	-148	27.3627	-1.0756	MSL1	male-specific lethal 1 homolog (Drosophila)
227841_at	7.19e-13	4.73e-16	-148	27.3613	-1.30428	AMDHD2	amidohydrolase domain containing 2
219559_at	7.57e-13	5.12e-16	-146	27.2966	-1.91949	SLC17A9	solute carrier family 17, member 9
1559616_x_at	8.82e-13	6.29e-16	143	27.1264	0.9795	ZNF626	zinc finger protein 626
239607_at	8.82e-13	6.29e-16	143	27.1262	0.962398	GPR156	G protein-coupled receptor 156
1557666_s_at	9.47e-13	6.93e-16	141	27.045	1.08934	AK8	adenylate kinase 8
1556224_a_at	9.85e-13	7.39e-16	-140	26.9915	-1.12731	ZNF783///LOC155060	zinc finger family member 783///AI894139 pseudogene
223812_at	9.86e-13	7.57e-16	140	26.9702	1.26448	FAM178B	family with sequence similarity 178, member B
215741_x_at	1e-12	8.11e-16	139	26.9124	0.99567	AKAP8L	A kinase (PRKA) anchor protein 8-like
236228_at	1e-12	8.41e-16	-138	26.8818	-1.21579	LOC100130744	uncharacterized LOC100130744
229180_at	1e-12	8.43e-16	138	26.8799	0.905694	WWC1	WW and C2 domain containing 1
224172_at	1e-12	8.46e-16	138	26.8771	1.21415
206944_at	1.05e-12	9.06e-16	137	26.8181	2.22003	HTR6	5-hydroxytryptamine (serotonin) receptor 6, G protein-coupled
208269_s_at	1.06e-12	9.34e-16	137	26.7928	1.43287	ADAM28	ADAM metallopeptidase domain 28
230832_at	1.08e-12	9.66e-16	-136	26.7637	-1.26895	RTF1	Rtf1, Paf1/RNA polymerase II complex component, homolog (S. cerevisiae)
206485_at	1.13e-12	1.03e-15	-135	26.7078	-1.09602	CD5	CD5 molecule
240644_at	1.29e-12	1.21e-15	-133	26.5723	-1.04803
211802_x_at	1.32e-12	1.26e-15	132	26.5375	0.997552	CACNA1G	calcium channel, voltage-dependent, T type, alpha 1G subunit
206869_at	1.41e-12	1.37e-15	131	26.4637	2.09192	CHAD	chondroadherin
231317_at	1.48e-12	1.47e-15	-130	26.4012	-0.995126
217039_x_at	1.48e-12	1.49e-15	-129	26.3882	-1.27675	IGHG1	immunoglobulin heavy constant gamma 1 (G1m marker)
1552769_at	1.62e-12	1.66e-15	128	26.2933	0.943154	ZNF625	zinc finger protein 625
203369_x_at	1.66e-12	1.75e-15	-127	26.2458	-1.20275	PDLIM7	PDZ and LIM domain 7 (enigma)
222861_x_at	1.66e-12	1.77e-15	127	26.2398	1.08414	FBXO44	F-box protein 44
214283_at	1.74e-12	1.91e-15	126	26.171	1.50835	TMEM97	transmembrane protein 97
217207_s_at	1.74e-12	1.91e-15	126	26.1704	0.897049	BTNL3	butyrophilin-like 3
1552873_s_at	1.77e-12	1.97e-15	-125	26.1419	-0.922928	ASMTL-AS1	ASMTL antisense RNA 1
207123_s_at	1.87e-12	2.12e-15	124	26.0762	1.36359	MATN4	matrilin 4
230754_at	1.9e-12	2.19e-15	124	26.0478	1.17019	ZBTB38	zinc finger and BTB domain containing 38
234943_at	1.91e-12	2.23e-15	-124	26.0316	-1.38236	LOC400927///CSNK1E	TPTE and PTEN homologous inositol lipid phosphatase pseudogene///casein kinase 1, epsilon
221967_at	1.95e-12	2.31e-15	123	26.0005	1.03879	NXPH4	neurexophilin 4
241862_x_at	1.97e-12	2.38e-15	123	25.9738	1.53073	C19orf45	chromosome 19 open reading frame 45
224316_at	1.98e-12	2.42e-15	122	25.9589	0.840673
205554_s_at	2.01e-12	2.5e-15	-122	25.93	-1.57678	DNASE1L3	deoxyribonuclease I-like 3
204746_s_at	2.1e-12	2.69e-15	121	25.8656	2.31695	PICK1	protein interacting with PRKCA 1
229806_at	2.1e-12	2.69e-15	-121	25.8651	-0.977301	QRICH1	glutamine-rich 1
211661_x_at	2.18e-12	2.83e-15	-120	25.8204	-1.1466	PTAFR	platelet-activating factor receptor
1570238_at	2.18e-12	2.87e-15	-120	25.8069	-1.09557	ZNF527	zinc finger protein 527
244131_at	2.18e-12	2.96e-15	-120	25.7791	-0.987595	HNRNPA2B1	heterogeneous nuclear ribonucleoprotein A2/B1
1569496_s_at	2.18e-12	2.99e-15	-119	25.7695	-1.05864	LOC100130872	uncharacterized LOC100130872
240398_at	2.18e-12	3.02e-15	119	25.7608	1.63373
1563867_at	2.18e-12	3.03e-15	119	25.7582	1.07329	LOC283194	uncharacterized LOC283194
207575_at	2.35e-12	3.31e-15	118	25.6792	1.09656	GOLGA6A	golgin A6 family, member A
1564010_at	2.35e-12	3.35e-15	-118	25.6676	-0.878015	CAST	calpastatin
214901_at	2.36e-12	3.41e-15	-118	25.6501	-0.998279	ZNF8	zinc finger protein 8
210350_x_at	2.4e-12	3.51e-15	-117	25.6238	-1.44605	ING1	inhibitor of growth family, member 1
242327_x_at	2.4e-12	3.57e-15	117	25.6103	0.85357
231071_at	2.4e-12	3.62e-15	117	25.5963	0.909439	YTHDF3-AS1	YTHDF3 antisense RNA 1 (head to head)
242376_at	2.4e-12	3.64e-15	117	25.5908	1.22126
235863_at	2.53e-12	3.89e-15	116	25.5301	0.968107	JSRP1	junctional sarcoplasmic reticulum protein 1
1562240_at	2.53e-12	3.93e-15	116	25.5213	1.94731	PLXNA4	plexin A4
233854_x_at	2.54e-12	3.99e-15	-116	25.5069	-1.18039	KLK4	kallikrein-related peptidase 4
1553207_at	2.62e-12	4.2e-15	115	25.4615	1.27451	ARL10	ADP-ribosylation factor-like 10
205897_at	2.62e-12	4.23e-15	-115	25.4553	-0.993726	NFATC4	nuclear factor of activated T-cells, cytoplasmic, calcineurin-dependent 4
219314_s_at	2.62e-12	4.28e-15	-115	25.4429	-1.84541	ZNF219	zinc finger protein 219
214674_at	2.62e-12	4.3e-15	115	25.4384	1.0076	USP19	ubiquitin specific peptidase 19
223525_at	2.8e-12	4.65e-15	-114	25.3669	-1.50537	DLL4	delta-like 4 (Drosophila)
230504_at	2.91e-12	4.97e-15	113	25.3063	0.897775	CEACAM19	carcinoembryonic antigen-related cell adhesion molecule 19
220908_at	2.91e-12	4.99e-15	113	25.3034	0.882482	CCDC33	coiled-coil domain containing 33
1561390_at	2.91e-12	5.05e-15	112	25.2916	0.828525	FAM41AY2///FAM41AY1	family with sequence similarity 41, member A, Y-linked 2///family with sequence similarity 41, member A, Y-linked 1
1570541_s_at	2.91e-12	5.05e-15	-112	25.2912	-1.12734	GBP1P1	guanylate binding protein 1, interferon-inducible pseudogene 1
216601_at	3.09e-12	5.43e-15	112	25.224	1.21109	AOC4	amine oxidase, copper containing 3 (vascular adhesion protein 1) pseudogene
219672_at	3.32e-12	5.93e-15	-110	25.1433	-0.847471	AHSP	alpha hemoglobin stabilizing protein
229985_at	3.32e-12	5.95e-15	110	25.1403	0.728449
232212_at	3.36e-12	6.16e-15	110	25.1078	0.759991	PLEKHA8	pleckstrin homology domain containing, family A (phosphoinositide binding specific) member 8
1565728_at	3.36e-12	6.17e-15	110	25.1061	1.03337	LOC284630	uncharacterized LOC284630
205708_s_at	3.36e-12	6.21e-15	110	25.1006	0.974662	TRPM2	transient receptor potential cation channel, subfamily M, member 2
207929_at	3.38e-12	6.32e-15	110	25.0833	0.834042	GRPR	gastrin-releasing peptide receptor
242811_x_at	3.38e-12	6.38e-15	-109	25.0753	-0.932187
229375_at	3.47e-12	6.61e-15	109	25.0419	0.98425	PPIE	peptidylprolyl isomerase E (cyclophilin E)
241939_at	3.5e-12	6.73e-15	109	25.0252	0.792837	IQGAP3	IQ motif containing GTPase activating protein 3
229612_at	3.5e-12	6.79e-15	109	25.0168	0.973812
229037_at	3.59e-12	7.02e-15	108	24.9856	0.805026	TRIM69	tripartite motif containing 69
240328_at	3.64e-12	7.18e-15	108	24.9638	0.71345
1563012_x_at	3.67e-12	7.39e-15	108	24.9376	1.72073
222187_x_at	3.67e-12	7.39e-15	108	24.9375	1.13222	G3BP1	GTPase activating protein (SH3 domain) binding protein 1
204947_at	4.07e-12	8.26e-15	106	24.8325	1.18763	E2F1	E2F transcription factor 1
240854_x_at	4.09e-12	8.39e-15	106	24.8187	1.00953
217291_at	4.15e-12	8.61e-15	-106	24.7944	-0.908726	CEACAM5	carcinoembryonic antigen-related cell adhesion molecule 5
242933_at	4.15e-12	8.72e-15	-106	24.7821	-0.830923
215326_at	4.15e-12	8.79e-15	106	24.7748	1.03959	PAK4	p21 protein (Cdc42/Rac)-activated kinase 4
242552_x_at	4.15e-12	8.86e-15	105	24.7673	0.792349	ZBED5	zinc finger, BED-type containing 5
206814_at	4.15e-12	8.91e-15	-105	24.7616	-0.786314	NGF	nerve growth factor (beta polypeptide)
230297_x_at	4.15e-12	8.96e-15	105	24.7563	2.23366	SYNGAP1	synaptic Ras GTPase activating protein 1
238670_at	4.16e-12	9.06e-15	-105	24.7455	-0.89173	RAD18	RAD18 homolog (S. cerevisiae)
241095_at	4.31e-12	9.46e-15	-105	24.7047	-0.954093
1553663_a_at	4.32e-12	9.56e-15	-104	24.6949	-0.791058	NPB	neuropeptide B
225966_at	4.43e-12	9.88e-15	104	24.6641	0.875558	C17orf89	chromosome 17 open reading frame 89
244642_at	4.53e-12	1.02e-14	-104	24.6335	-0.782079
231419_at	4.53e-12	1.03e-14	-104	24.6279	-1.36821	LOC100505555	uncharacterized LOC100505555
1560588_at	4.58e-12	1.05e-14	103	24.6096	0.793391
239526_x_at	4.72e-12	1.09e-14	-103	24.573	-0.842875	PTPN1	protein tyrosine phosphatase, non-receptor type 1
206019_at	4.76e-12	1.12e-14	103	24.5459	0.863631	RBM19	RNA binding motif protein 19
216153_x_at	4.76e-12	1.13e-14	102	24.5351	1.25979	RECK	reversion-inducing-cysteine-rich protein with kazal motifs
203003_at	4.76e-12	1.13e-14	-102	24.5348	-1.19535	MEF2D	myocyte enhancer factor 2D
244046_at	4.76e-12	1.14e-14	102	24.5289	0.732693	URGCP	upregulator of cell proliferation
209972_s_at	4.76e-12	1.14e-14	102	24.5287	0.893404	AIMP2	aminoacyl tRNA synthetase complex-interacting multifunctional protein 2
231375_at	4.76e-12	1.15e-14	102	24.5215	0.841346	LOC202181	SUMO-interacting motifs containing 1 pseudogene
229445_at	4.77e-12	1.17e-14	-102	24.5035	-0.972618	CYBA	cytochrome b-245, alpha polypeptide
240270_x_at	4.77e-12	1.18e-14	-102	24.4989	-0.791725	LOC283728	uncharacterized LOC283728
237190_at	4.77e-12	1.18e-14	-102	24.4978	-0.824747
229991_s_at	4.99e-12	1.24e-14	-101	24.4469	-0.781017	SYTL4	synaptotagmin-like 4
1566403_at	5.14e-12	1.29e-14	101	24.4129	0.86992	SNORA68	small nucleolar RNA, H/ACA box 68
205629_s_at	5.41e-12	1.37e-14	-100	24.3556	-0.98012	CRH	corticotropin releasing hormone
220255_at	5.73e-12	1.46e-14	99.5	24.2936	1.43083	FANCE	Fanconi anemia, complementation group E
211141_s_at	5.81e-12	1.49e-14	-99.3	24.2745	-0.770664	CNOT3	CCR4-NOT transcription complex, subunit 3
223845_at	5.81e-12	1.51e-14	99.2	24.2628	0.765369	VSIG10	V-set and immunoglobulin domain containing 10
1554475_a_at	5.81e-12	1.51e-14	-99.1	24.2603	-0.701143	C19orf47	chromosome 19 open reading frame 47
214630_at	5.81e-12	1.54e-14	98.9	24.2408	0.791481	CYP11B2	cytochrome P450, family 11, subfamily B, polypeptide 2
233212_at	5.81e-12	1.55e-14	-98.8	24.2358	-0.651392
1556650_at	5.81e-12	1.55e-14	98.8	24.2339	0.717523
1555198_x_at	5.81e-12	1.55e-14	-98.8	24.2338	-0.719411	C21orf58	chromosome 21 open reading frame 58
207193_at	5.93e-12	1.61e-14	-98.4	24.2	-0.773253	AGRP	agouti related protein homolog (mouse)
1558760_at	5.93e-12	1.61e-14	98.4	24.1958	0.815057
220185_at	5.93e-12	1.62e-14	-98.4	24.1942	-0.890132	SPTBN4	spectrin, beta, non-erythrocytic 4
1560439_at	5.96e-12	1.64e-14	-98.2	24.1831	-0.980103	LINGO3	leucine rich repeat and Ig domain containing 3
240311_at	6.09e-12	1.68e-14	97.9	24.156	0.857652	NANOS3	nanos homolog 3 (Drosophila)
228060_at	6.17e-12	1.72e-14	-97.7	24.1367	-0.906629	SLC35F1	solute carrier family 35, member F1
241246_at	6.46e-12	1.81e-14	97.1	24.0859	0.934218
230347_at	6.47e-12	1.82e-14	-97	24.0784	-0.771862	ORAI2	ORAI calcium release-activated calcium modulator 2
232178_at	6.78e-12	1.92e-14	96.4	24.0265	0.712979	ZNF503	zinc finger protein 503
231135_at	6.92e-12	1.98e-14	-96.1	24.0007	-0.858067	LOC151174	uncharacterized LOC151174
229988_at	6.93e-12	1.99e-14	-96	23.9934	-0.634073
1558581_at	6.95e-12	2.01e-14	95.9	23.9847	0.703048	TEX22	testis expressed 22
237618_at	7.14e-12	2.08e-14	-95.5	23.9519	-0.87132
222937_s_at	7.16e-12	2.09e-14	95.5	23.9439	0.906554	MMP28	matrix metallopeptidase 28
242159_at	7.17e-12	2.11e-14	95.4	23.9359	1.0245	LOC100506684	uncharacterized LOC100506684
1559028_at	7.19e-12	2.15e-14	-95.2	23.9195	-0.835907	C21orf15	chromosome 21 open reading frame 15
1554538_at	7.19e-12	2.15e-14	95.2	23.919	0.602743	RHOF	ras homolog family member F (in filopodia)
241667_x_at	7.19e-12	2.16e-14	95.1	23.9161	0.780096
204626_s_at	7.38e-12	2.23e-14	-94.8	23.8837	-0.723774	ITGB3	integrin, beta 3 (platelet glycoprotein IIIa, antigen CD61)
238473_at	7.4e-12	2.25e-14	94.7	23.8762	0.650242	LOC100216545	uncharacterized LOC100216545
227664_at	7.41e-12	2.27e-14	94.6	23.8678	0.675619	FLJ37453	uncharacterized LOC729614
214625_s_at	7.41e-12	2.28e-14	-94.5	23.8623	-0.632297	MINK1	misshapen-like kinase 1
1556468_at	7.46e-12	2.3e-14	-94.4	23.8511	-0.656735	LOC100288099	hypothetical protein LOC100288099
1566231_at	7.56e-12	2.36e-14	94.2	23.8297	0.637987
217573_at	7.56e-12	2.36e-14	94.1	23.8262	0.777438	GRIN2C	glutamate receptor, ionotropic, N-methyl D-aspartate 2C
1553845_x_at	7.72e-12	2.43e-14	-93.8	23.8	-0.704072	C10orf67	chromosome 10 open reading frame 67
233258_at	7.97e-12	2.53e-14	-93.4	23.7609	-0.801499
237747_at	7.97e-12	2.54e-14	93.4	23.7575	0.700349	LOC100507281	uncharacterized LOC100507281
224466_s_at	8.15e-12	2.61e-14	93.1	23.7307	0.75248	MAFG	v-maf musculoaponeurotic fibrosarcoma oncogene homolog G (avian)
1557244_a_at	9.08e-12	2.92e-14	91.8	23.6191	0.933306
243331_at	9.39e-12	3.04e-14	91.4	23.5809	0.795841
217275_at	9.59e-12	3.12e-14	91.1	23.5542	0.719434	TSSK2	testis-specific serine kinase 2
201907_x_at	9.87e-12	3.23e-14	90.8	23.5209	0.919423	DVL3	dishevelled segment polarity protein 3
214237_x_at	9.93e-12	3.27e-14	-90.7	23.5099	-1.10649	PAWR	PRKC, apoptosis, WT1, regulator
210169_at	1.01e-11	3.35e-14	-90.4	23.4855	-0.782796	SEC14L5	SEC14-like 5 (S. cerevisiae)
216023_at	1.05e-11	3.5e-14	-89.9	23.4415	-0.829948	KDM4B	lysine (K)-specific demethylase 4B
35150_at	1.05e-11	3.5e-14	-89.9	23.441	-1.05014	CD40	CD40 molecule, TNF receptor superfamily member 5
1555399_a_at	1.08e-11	3.65e-14	-89.5	23.4018	-0.657134	DUSP16	dual specificity phosphatase 16
204724_s_at	1.1e-11	3.74e-14	89.3	23.3761	0.810397	COL9A3	collagen, type IX, alpha 3
243351_at	1.1e-11	3.75e-14	-89.3	23.375	-0.7907	FZD10-AS1	FZD10 antisense RNA 1 (head to head)
231064_s_at	1.14e-11	3.88e-14	-88.9	23.3398	-0.758711
237266_at	1.14e-11	3.92e-14	88.8	23.3304	0.766423	KCNIP2-AS1	KCNIP2 antisense RNA 1
229597_s_at	1.16e-11	4.01e-14	-88.6	23.3079	-2.41568	WDFY4	WDFY family member 4
206754_s_at	1.16e-11	4.03e-14	88.5	23.3043	1.12505	CYP2B7P1///CYP2B6	cytochrome P450, family 2, subfamily B, polypeptide 7 pseudogene 1///cytochrome P450, family 2, subfamily B, polypeptide 6
237977_at	1.16e-11	4.04e-14	-88.5	23.3008	-0.731506	LOC100996349	testis expressed 264 pseudogene
236093_at	1.16e-11	4.07e-14	-88.4	23.2944	-0.76492
206231_at	1.19e-11	4.2e-14	-88.1	23.2635	-0.698516	KCNN1	potassium intermediate/small conductance calcium-activated channel, subfamily N, member 1
240235_at	1.22e-11	4.32e-14	-87.8	23.2348	-0.782111	C10orf62	chromosome 10 open reading frame 62
232062_at	1.23e-11	4.37e-14	-87.7	23.2232	-0.692227	ADCY1	adenylate cyclase 1 (brain)
234287_at	1.23e-11	4.41e-14	-87.6	23.2133	-0.674664
235600_at	1.25e-11	4.49e-14	-87.4	23.1966	-0.951256
222302_at	1.26e-11	4.55e-14	-87.3	23.1826	-0.640475	LOC100507009	uncharacterized LOC100507009
232240_at	1.3e-11	4.73e-14	86.9	23.1453	0.644844	DNHD1	dynein heavy chain domain 1
1553396_a_at	1.31e-11	4.78e-14	86.8	23.1337	1.06102	CCDC13	coiled-coil domain containing 13
232680_at	1.32e-11	4.84e-14	86.7	23.1225	0.712169	HDGFL1	hepatoma derived growth factor-like 1
206524_at	1.33e-11	4.93e-14	86.5	23.1037	0.920934	T	T, brachyury homolog (mouse)
209768_s_at	1.39e-11	5.17e-14	-86	23.056	-1.66183	SEPT5///GP1BB	septin 5///glycoprotein Ib (platelet), beta polypeptide
208497_x_at	1.4e-11	5.23e-14	-85.9	23.0448	-0.966764	NEUROG1	neurogenin 1
241784_x_at	1.43e-11	5.35e-14	-85.7	23.0223	-0.591813	HELQ	helicase, POLQ-like
240397_x_at	1.45e-11	5.49e-14	-85.4	22.9962	-0.62614
1564887_at	1.45e-11	5.52e-14	85.4	22.9917	0.878852
229920_at	1.45e-11	5.52e-14	-85.4	22.9917	-0.998447
1563654_at	1.46e-11	5.57e-14	85.3	22.9827	0.619752	C8orf66	chromosome 8 open reading frame 66
237414_at	1.48e-11	5.69e-14	85	22.9605	0.951985	F7	coagulation factor VII (serum prothrombin conversion accelerator)
1555550_at	1.49e-11	5.75e-14	84.9	22.9508	0.653799	ZACN	zinc activated ligand-gated ion channel
229928_at	1.51e-11	5.87e-14	84.7	22.9295	1.39943	LOC100507265	uncharacterized LOC100507265
1560214_at	1.53e-11	5.97e-14	-84.6	22.914	-0.785103	SPG11	spastic paraplegia 11 (autosomal recessive)
243112_at	1.55e-11	6.07e-14	84.4	22.8973	0.727164	LOC100996424	uncharacterized LOC100996424
205723_at	1.56e-11	6.19e-14	84.2	22.8765	0.650559	CNTFR	ciliary neurotrophic factor receptor
217265_at	1.56e-11	6.2e-14	84.2	22.8752	0.713375	PLLP	plasmolipin
239670_at	1.56e-11	6.2e-14	-84.2	22.8747	-0.947841
212939_at	1.58e-11	6.31e-14	-84	22.8577	-0.668127	COL6A1	collagen, type VI, alpha 1
231888_at	1.64e-11	6.56e-14	83.7	22.8195	0.720939
229248_at	1.64e-11	6.61e-14	83.6	22.8108	1.7291
238105_x_at	1.64e-11	6.65e-14	-83.5	22.8059	-0.632114	WNT7B	wingless-type MMTV integration site family, member 7B
216936_at	1.66e-11	6.76e-14	83.4	22.7897	1.60245
224211_at	1.77e-11	7.21e-14	82.8	22.7242	0.797342	FOXP3	forkhead box P3
206458_s_at	1.81e-11	7.4e-14	-82.5	22.6987	-0.851207	WNT2B	wingless-type MMTV integration site family, member 2B
1559870_at	1.93e-11	7.93e-14	-81.8	22.6283	-0.611428	LOC100129129	uncharacterized LOC100129129
215584_at	1.93e-11	7.99e-14	-81.8	22.6213	-0.559158	HECW1	HECT, C2 and WW domain containing E3 ubiquitin protein ligase 1
227365_at	1.94e-11	8.07e-14	-81.7	22.6114	-0.948714	ATCAY	ataxia, cerebellar, Cayman type
234746_at	1.94e-11	8.12e-14	81.6	22.6053	0.823766
214335_at	1.94e-11	8.14e-14	-81.6	22.6028	-1.08041	RPL18	ribosomal protein L18
1555348_at	1.97e-11	8.29e-14	-81.4	22.584	-0.639832	TFAP2E	transcription factor AP-2 epsilon (activating enhancer binding protein 2 epsilon)
1559701_s_at	1.98e-11	8.38e-14	81.3	22.5739	0.55045	NDST2	N-deacetylase/N-sulfotransferase (heparan glucosaminyl) 2
213834_at	2.03e-11	8.61e-14	-81.1	22.5468	-0.666524	IQSEC3	IQ motif and Sec7 domain 3
204951_at	2.03e-11	8.65e-14	-81	22.5414	-0.559653	RHOH	ras homolog family member H
214145_s_at	2.03e-11	8.69e-14	81	22.5368	0.56337	SPTB	spectrin, beta, erythrocytic
229698_at	2.06e-11	8.86e-14	-80.8	22.5178	-1.43298
241715_x_at	2.14e-11	9.22e-14	-80.4	22.4776	-0.560447	ACPT	acid phosphatase, testicular
1563635_at	2.2e-11	9.61e-14	80.1	22.4355	0.934945
232937_at	2.2e-11	9.62e-14	-80.1	22.435	-1.03305
214133_at	2.2e-11	9.62e-14	80	22.4343	0.939418	MUC6	mucin 6, oligomeric mucus/gel-forming
1566957_at	2.2e-11	9.67e-14	80	22.4288	0.725344	OR7E104P	olfactory receptor, family 7, subfamily E, member 104 pseudogene
210482_x_at	2.21e-11	9.75e-14	79.9	22.4207	0.604734	MAP2K5	mitogen-activated protein kinase kinase 5
1555006_at	2.26e-11	1e-13	-79.7	22.3918	-0.627457	WDR66	WD repeat domain 66
231407_s_at	2.26e-11	1.01e-13	79.6	22.3893	1.53129	FOXH1	forkhead box H1
204101_at	2.27e-11	1.02e-13	79.5	22.3802	0.697755	MTM1	myotubularin 1
238265_x_at	2.29e-11	1.03e-13	-79.4	22.3692	-0.977272
236867_at	2.29e-11	1.03e-13	79.4	22.365	0.829835
206657_s_at	2.31e-11	1.05e-13	79.2	22.3461	0.879286	MYOD1	myogenic differentiation 1
206080_at	2.31e-11	1.05e-13	79.2	22.3449	0.526063	PLCH2	phospholipase C, eta 2
1565132_at	2.31e-11	1.05e-13	-79.2	22.3422	-0.665933	RBMY3AP	RNA binding motif protein, Y-linked, family 3, member A pseudogene
221344_at	2.31e-11	1.05e-13	79.2	22.3419	0.640027	OR12D2	olfactory receptor, family 12, subfamily D, member 2
215996_at	2.33e-11	1.07e-13	79.1	22.3266	0.556937
239396_at	2.33e-11	1.07e-13	-79	22.3245	-1.3308
1565807_at	2.41e-11	1.11e-13	-78.7	22.2858	-0.777265
1559532_at	2.42e-11	1.13e-13	78.6	22.2733	0.767756	ARIH2OS	ariadne homolog 2 opposite strand
1556078_at	2.42e-11	1.13e-13	-78.6	22.271	-0.65894	LOC100289632	hypothetical protein LOC100289632
243953_at	2.47e-11	1.16e-13	78.4	22.2477	0.81898	FADS2	fatty acid desaturase 2
1563878_a_at	2.47e-11	1.16e-13	-78.3	22.2438	-0.682001	LOC338963	epididymal protein pseudogene
1561546_at	2.52e-11	1.19e-13	78.1	22.2195	0.599689	FGD5-AS1	FGD5 antisense RNA 1
206807_s_at	2.6e-11	1.24e-13	77.8	22.1802	0.576095	ADD2	adducin 2 (beta)
210477_x_at	2.6e-11	1.24e-13	-77.8	22.1801	-0.989189	MAPK8	mitogen-activated protein kinase 8
233072_at	2.67e-11	1.27e-13	-77.5	22.1502	-0.533037	NTNG2	netrin G2
239419_at	2.7e-11	1.29e-13	77.3	22.1337	0.655297	PTPRA	protein tyrosine phosphatase, receptor type, A
221975_s_at	2.78e-11	1.34e-13	77	22.0983	1.1292	C21orf2	chromosome 21 open reading frame 2
220267_at	2.78e-11	1.34e-13	-77	22.0963	-1.04208	KRT24	keratin 24
235081_x_at	2.82e-11	1.37e-13	76.9	22.0773	1.09092	TRIM65	tripartite motif containing 65
241919_x_at	2.82e-11	1.37e-13	76.8	22.0751	0.804736	WDR31	WD repeat domain 31
1555268_a_at	2.88e-11	1.41e-13	-76.6	22.0503	-1.83296	GRID1	glutamate receptor, ionotropic, delta 1
221956_at	2.99e-11	1.46e-13	-76.3	22.0089	-0.680729	LRCH4	leucine-rich repeats and calponin homology (CH) domain containing 4
213611_at	3.01e-11	1.48e-13	76.2	21.9984	0.64073	AQP5	aquaporin 5
1558381_a_at	3.04e-11	1.5e-13	-76	21.9836	-0.73395	LOC100506469	uncharacterized LOC100506469
206236_at	3.04e-11	1.51e-13	-76	21.9809	-1.31776	GPR4	G protein-coupled receptor 4
1569322_at	3.08e-11	1.54e-13	75.8	21.958	1.01654	LINC00857	long intergenic non-protein coding RNA 857
216330_s_at	3.08e-11	1.54e-13	-75.8	21.9578	-0.686804	POU6F1	POU class 6 homeobox 1
1570542_a_at	3.11e-11	1.56e-13	-75.7	21.9447	-0.669163	PMPCB	peptidase (mitochondrial processing) beta
237555_at	3.17e-11	1.6e-13	75.5	21.9209	0.588676	CARS2	cysteinyl-tRNA synthetase 2, mitochondrial (putative)
1565715_at	3.2e-11	1.61e-13	75.4	21.9103	0.573077	FUS	fused in sarcoma
240178_at	3.29e-11	1.67e-13	75.1	21.8758	0.617283
233959_at	3.29e-11	1.67e-13	-75.1	21.8731	-0.528071	ADCY10P1	adenylate cyclase 10 (soluble) pseudogene 1
205666_at	3.32e-11	1.69e-13	75	21.8601	0.621108	FMO1	flavin containing monooxygenase 1
1563800_at	3.36e-11	1.72e-13	74.8	21.8433	0.7024	LOC283140	uncharacterized LOC283140
1556321_a_at	3.36e-11	1.73e-13	-74.8	21.8394	-0.839352
237443_at	3.38e-11	1.75e-13	-74.7	21.8285	-0.599335
1570239_a_at	3.38e-11	1.75e-13	74.7	21.8262	0.683524	CLNK	cytokine-dependent hematopoietic cell linker
216678_at	3.38e-11	1.75e-13	74.7	21.8248	0.91084	IFT122	intraflagellar transport 122 homolog (Chlamydomonas)
228312_at	3.41e-11	1.79e-13	-74.5	21.8062	-1.0929	PI16	peptidase inhibitor 16
203591_s_at	3.41e-11	1.79e-13	-74.5	21.8046	-0.655508	CSF3R	colony stimulating factor 3 receptor (granulocyte)
235966_at	3.41e-11	1.79e-13	-74.5	21.8028	-1.10511	DAB2IP	DAB2 interacting protein
1560872_at	3.44e-11	1.81e-13	-74.4	21.7928	-0.884923
219152_at	3.46e-11	1.83e-13	74.3	21.7824	0.568093	PODXL2	podocalyxin-like 2
235832_at	3.48e-11	1.85e-13	-74.2	21.7722	-0.686682	NKX6-2	NK6 homeobox 2
227877_at	3.48e-11	1.85e-13	-74.2	21.769	-0.916258	ANXA2R	annexin A2 receptor
1555694_a_at	3.52e-11	1.88e-13	74.1	21.7548	0.550958	KCNIP3	Kv channel interacting protein 3, calsenilin
1553839_at	3.52e-11	1.88e-13	74.1	21.7515	0.623624	CCDC149	coiled-coil domain containing 149
244792_at	3.55e-11	1.91e-13	74	21.7386	0.74883
1558167_a_at	3.55e-11	1.92e-13	73.9	21.7348	1.6674	MGC16275	uncharacterized protein MGC16275
205374_at	3.59e-11	1.94e-13	-73.8	21.7191	-0.589511	SLN	sarcolipin
232926_x_at	3.63e-11	1.97e-13	73.7	21.7061	0.572905	ANKRD19P	ankyrin repeat domain 19, pseudogene
237033_at	3.64e-11	1.98e-13	73.6	21.7001	0.589185	FAM159A	family with sequence similarity 159, member A
244810_at	3.66e-11	2e-13	-73.5	21.6893	-0.602472
240643_at	3.67e-11	2.02e-13	73.5	21.6828	0.597065	TTBK1	tau tubulin kinase 1
1554430_at	3.7e-11	2.04e-13	-73.4	21.6718	-0.564562	SMIM11	small integral membrane protein 11
213466_at	3.8e-11	2.1e-13	-73.2	21.6419	-0.862609	RAB40C	RAB40C, member RAS oncogene family
1570366_x_at	3.8e-11	2.1e-13	-73.1	21.639	-0.778382	ZNF709	zinc finger protein 709
239826_at	3.82e-11	2.13e-13	-73	21.6275	-0.557516
243826_at	3.82e-11	2.13e-13	73	21.626	0.862423
244656_at	3.82e-11	2.14e-13	73	21.6235	0.570303	RASL10B	RAS-like, family 10, member B
1569005_at	3.85e-11	2.16e-13	72.9	21.611	0.584764
1554346_at	3.85e-11	2.17e-13	72.9	21.6076	0.554266	GNB5	guanine nucleotide binding protein (G protein), beta 5
207353_s_at	3.94e-11	2.23e-13	-72.6	21.5795	-0.723872	HMX1	H6 family homeobox 1
1569446_x_at	3.94e-11	2.23e-13	-72.6	21.5779	-0.552032
238241_at	3.99e-11	2.27e-13	72.5	21.5611	0.68014	LOC100144602	uncharacterized LOC100144602
229703_at	4.06e-11	2.32e-13	72.3	21.5387	0.589126	DLG1	discs, large homolog 1 (Drosophila)
207914_x_at	4.12e-11	2.36e-13	-72.2	21.5207	-0.742745	EVX1	even-skipped homeobox 1
1567539_at	4.19e-11	2.41e-13	-72	21.4989	-0.687459	MFGE8	milk fat globule-EGF factor 8 protein
207767_s_at	4.19e-11	2.41e-13	72	21.4974	0.906221	EGR4	early growth response 4
215822_x_at	4.26e-11	2.46e-13	-71.8	21.4774	-0.841645	MYT1	myelin transcription factor 1
241489_at	4.36e-11	2.53e-13	71.6	21.4501	0.964978
217567_at	4.36e-11	2.53e-13	71.6	21.448	0.546207	TGM4	transglutaminase 4
229079_at	4.36e-11	2.54e-13	71.5	21.4442	0.494739	EHMT2	euchromatic histone-lysine N-methyltransferase 2
244150_at	4.39e-11	2.57e-13	-71.5	21.434	-0.640376
205424_at	4.46e-11	2.62e-13	71.3	21.4129	0.615711	TBKBP1	TBK1 binding protein 1
1560818_at	4.46e-11	2.63e-13	-71.3	21.4102	-0.515684
1569193_at	4.49e-11	2.65e-13	-71.2	21.4014	-0.533763
217324_at	4.52e-11	2.69e-13	-71.1	21.3881	-1.14182
236507_at	4.52e-11	2.69e-13	-71.1	21.3871	-1.09958	ZDHHC3	zinc finger, DHHC-type containing 3
239720_at	4.53e-11	2.7e-13	-71	21.3822	-1.89349	ZGLP1	zinc finger, GATA-like protein 1
214072_x_at	4.53e-11	2.71e-13	-71	21.3798	-0.530866	NENF	neudesin neurotrophic factor
227706_at	4.55e-11	2.73e-13	-71	21.3701	-1.00307	SPIRE2	spire homolog 2 (Drosophila)
231774_at	4.56e-11	2.75e-13	70.9	21.3649	0.578636	KCNIP3	Kv channel interacting protein 3, calsenilin
1569737_a_at	4.56e-11	2.75e-13	-70.9	21.3624	-0.531155	CASKIN1	CASK interacting protein 1
233287_at	4.68e-11	2.83e-13	-70.7	21.3335	-0.598808	SLC6A17	solute carrier family 6, member 17
216103_at	4.74e-11	2.88e-13	-70.5	21.317	-1.6735	ACOT11	acyl-CoA thioesterase 11
1552412_a_at	4.82e-11	2.94e-13	70.4	21.296	0.860861	DEFB106B///DEFB106A	defensin, beta 106B///defensin, beta 106A
213336_at	4.95e-11	3.02e-13	-70.1	21.2654	-1.94619	BAZ1B	bromodomain adjacent to zinc finger domain, 1B
1569963_at	4.98e-11	3.05e-13	-70.1	21.2569	-0.5651
237779_at	5.05e-11	3.11e-13	-69.9	21.2381	-1.34948	LOC100505711	uncharacterized LOC100505711
208373_s_at	5.06e-11	3.12e-13	-69.9	21.2335	-1.27073	P2RY6	pyrimidinergic receptor P2Y, G-protein coupled, 6
1559674_at	5.07e-11	3.13e-13	-69.8	21.2293	-0.521782	ZNF333	zinc finger protein 333
205797_s_at	5.1e-11	3.16e-13	69.8	21.2195	1.30298	TCP11L1	t-complex 11, testis-specific-like 1
205294_at	5.14e-11	3.2e-13	69.7	21.2058	2.07688	BAIAP2	BAI1-associated protein 2
217693_x_at	5.14e-11	3.21e-13	69.7	21.2048	0.82314
216694_at	5.19e-11	3.24e-13	69.6	21.193	0.72787	PQLC3	PQ loop repeat containing 3
210072_at	5.2e-11	3.27e-13	69.5	21.1852	0.608661	CCL19	chemokine (C-C motif) ligand 19
208156_x_at	5.2e-11	3.27e-13	69.5	21.1851	1.60479	EPPK1	epiplakin 1
1565832_at	5.22e-11	3.3e-13	-69.4	21.1764	-0.650185	KANK1	KN motif and ankyrin repeat domains 1
234505_at	5.22e-11	3.3e-13	-69.4	21.1754	-0.876043
215788_at	5.4e-11	3.43e-13	69.1	21.136	0.483423	C1orf222	chromosome 1 open reading frame 222
223587_s_at	5.41e-11	3.46e-13	69.1	21.1277	0.587523	AMN	amnion associated transmembrane protein
230639_at	5.41e-11	3.46e-13	-69	21.1267	-0.778447	ICA1	islet cell autoantigen 1, 69kDa
1554317_s_at	5.41e-11	3.46e-13	-69	21.1265	-0.716287	TRMT61A	tRNA methyltransferase 61 homolog A (S. cerevisiae)
206097_at	5.41e-11	3.47e-13	69	21.1225	0.600434	SLC22A18AS	solute carrier family 22 (organic cation transporter), member 18 antisense
209880_s_at	5.65e-11	3.64e-13	-68.6	21.0751	-0.879617	SELPLG	selectin P ligand
205829_at	5.67e-11	3.66e-13	68.6	21.0682	1.39873	HSD17B1	hydroxysteroid (17-beta) dehydrogenase 1
231651_at	5.71e-11	3.7e-13	68.5	21.0579	0.615442
1555826_at	5.78e-11	3.75e-13	68.4	21.0433	2.442	EPR1	effector cell peptidase receptor 1 (non-protein coding)
204708_at	5.8e-11	3.78e-13	-68.3	21.0357	-0.553605	MAPK4	mitogen-activated protein kinase 4
223514_at	5.81e-11	3.8e-13	-68.3	21.0308	-1.8397	CARD11	caspase recruitment domain family, member 11
1556864_at	5.94e-11	3.89e-13	68.1	21.0059	0.448432	TCTN1	tectonic family member 1
238422_at	5.98e-11	3.93e-13	68	20.9952	0.501413	LBX2-AS1	LBX2 antisense RNA 1
216878_x_at	5.98e-11	3.94e-13	68	20.9909	0.648225	HAB1	B1 for mucin
236583_at	5.98e-11	3.95e-13	68	20.9899	0.582804	GIMAP1	GTPase, IMAP family member 1
235972_at	5.98e-11	3.96e-13	68	20.9863	0.840622	TMEM131	transmembrane protein 131
237630_s_at	5.99e-11	3.97e-13	67.9	20.9832	0.666238	FAM86B3P	family with sequence similarity 86, member A pseudogene
243218_at	6.04e-11	4.02e-13	-67.9	20.971	-1.04786
228840_at	6.05e-11	4.04e-13	67.8	20.9667	1.50999	AMOTL1	angiomotin like 1
230672_at	6.13e-11	4.12e-13	67.7	20.9452	1.45413
237338_at	6.13e-11	4.12e-13	-67.7	20.9452	-0.851603	B3GNT8	UDP-GlcNAc:betaGal beta-1,3-N-acetylglucosaminyltransferase 8
1557545_s_at	6.13e-11	4.12e-13	-67.7	20.9449	-1.42425	RNF165	ring finger protein 165
215579_at	6.17e-11	4.16e-13	-67.6	20.9346	-0.518256	APOBEC3G	apolipoprotein B mRNA editing enzyme, catalytic polypeptide-like 3G
210126_at	6.39e-11	4.32e-13	-67.3	20.8964	-1.03084	PSG9	pregnancy specific beta-1-glycoprotein 9
1558174_at	6.5e-11	4.41e-13	-67.1	20.8746	-0.480192	FAM43A	family with sequence similarity 43, member A
205275_at	6.62e-11	4.51e-13	67	20.8526	0.720919	GTPBP1	GTP binding protein 1
1557232_at	6.64e-11	4.53e-13	66.9	20.8479	1.20714
243651_at	6.65e-11	4.55e-13	66.9	20.8436	0.550388	CPEB3	cytoplasmic polyadenylation element binding protein 3
209718_at	6.73e-11	4.61e-13	-66.8	20.828	-0.767952	NCAPH2	non-SMC condensin II complex, subunit H2
1554117_at	6.9e-11	4.77e-13	-66.5	20.7944	-0.781597	CCDC60	coiled-coil domain containing 60
230931_at	6.9e-11	4.77e-13	-66.5	20.794	-0.594938	PLG	plasminogen
207188_at	6.9e-11	4.78e-13	-66.5	20.7914	-2.16397	CDK3	cyclin-dependent kinase 3
236139_at	6.9e-11	4.79e-13	66.5	20.7901	0.729723
1561019_at	6.9e-11	4.8e-13	66.5	20.7882	0.474754
204316_at	7.1e-11	4.95e-13	-66.3	20.7561	-0.648476	RGS10	regulator of G-protein signaling 10
210984_x_at	7.11e-11	4.97e-13	66.2	20.7516	1.73234	EGFR	epidermal growth factor receptor
1561485_at	7.15e-11	5.01e-13	66.2	20.7428	0.992864	IQCA1	IQ motif containing with AAA domain 1
238889_at	7.17e-11	5.04e-13	66.1	20.7373	1.07452	AGBL5	ATP/GTP binding protein-like 5
222308_x_at	7.17e-11	5.05e-13	66.1	20.7351	0.529518
223323_x_at	7.17e-11	5.06e-13	-66.1	20.7326	-0.444302	TRPM7	transient receptor potential cation channel, subfamily M, member 7
216668_at	7.17e-11	5.07e-13	66.1	20.7294	1.37071
215875_at	7.21e-11	5.11e-13	66	20.7215	0.640997
1569091_at	7.31e-11	5.2e-13	65.9	20.7042	1.17637
233862_at	7.43e-11	5.3e-13	65.7	20.6844	0.951389
209979_at	7.47e-11	5.34e-13	65.7	20.6764	0.483535	ADARB1	adenosine deaminase, RNA-specific, B1
214354_x_at	7.48e-11	5.36e-13	-65.6	20.6724	-1.86681	SFTPB	surfactant protein B
228270_at	7.5e-11	5.39e-13	-65.6	20.6659	-0.573387	ZNF853	zinc finger protein 853
1552315_at	7.5e-11	5.4e-13	-65.6	20.6643	-0.448457	GIMAP1	GTPase, IMAP family member 1
236284_at	7.5e-11	5.41e-13	65.6	20.6617	0.527569	KIAA0146	KIAA0146
242654_at	7.51e-11	5.44e-13	-65.5	20.6569	-0.609391	FANCC	Fanconi anemia, complementation group C
243708_at	7.7e-11	5.59e-13	65.3	20.629	0.59148	TMEM132E	transmembrane protein 132E
1558463_s_at	7.72e-11	5.62e-13	65.3	20.6228	0.496909	LMF1	lipase maturation factor 1
1561937_x_at	7.76e-11	5.67e-13	-65.2	20.614	-0.567436
234070_at	7.76e-11	5.67e-13	65.2	20.613	0.518665
242400_at	7.79e-11	5.71e-13	65.2	20.6058	0.554512	ZFP90	ZFP90 zinc finger protein
1565731_at	7.79e-11	5.73e-13	65.1	20.6029	0.511528	ALDH3B1	aldehyde dehydrogenase 3 family, member B1
231129_at	7.84e-11	5.79e-13	-65.1	20.5925	-0.623775	LOC728012	uncharacterized LOC728012
216067_at	7.84e-11	5.79e-13	65.1	20.5914	0.638357
208090_s_at	7.9e-11	5.85e-13	-65	20.581	-0.686094	AIRE	autoimmune regulator
211641_x_at	8.13e-11	6.04e-13	-64.7	20.5481	-0.672538	IGHV3-48///IGHV4-31///IGHM///IGHG3///IGHG1///IGHD///IGHA2///IGHA1	immunoglobulin heavy variable 3-48///immunoglobulin heavy variable 4-31///immunoglobulin heavy constant mu///immunoglobulin heavy constant gamma 3 (G3m marker)///immunoglobulin heavy constant gamma 1 (G1m marker)///immunoglobulin heavy constant delta///immunoglobulin heavy constant alpha 2 (A2m marker)///immunoglobulin heavy constant alpha 1
233661_at	8.21e-11	6.13e-13	64.6	20.5327	0.739894	LINC00557	long intergenic non-protein coding RNA 557
1552383_at	8.21e-11	6.13e-13	64.6	20.5325	0.948802	FAM71A	family with sequence similarity 71, member A
241963_at	8.31e-11	6.22e-13	64.5	20.5179	0.459934	ZNF704	zinc finger protein 704
222926_at	8.86e-11	6.65e-13	64	20.448	0.626706	DCDC2	doublecortin domain containing 2
220819_at	9e-11	6.76e-13	63.9	20.4301	0.568729	FRMD1	FERM domain containing 1
239088_at	9e-11	6.78e-13	-63.9	20.4265	-0.508812
241317_at	9.1e-11	6.87e-13	-63.8	20.413	-0.510083	LOC283112	uncharacterized LOC283112
1570625_at	9.14e-11	6.94e-13	63.7	20.4024	0.550872	TCEB3	transcription elongation factor B (SIII), polypeptide 3 (110kDa, elongin A)
1563919_a_at	9.14e-11	6.94e-13	-63.7	20.4023	-0.568227	CEP89	centrosomal protein 89kDa
236497_at	9.14e-11	6.95e-13	-63.7	20.4012	-0.488972	LOC729683	uncharacterized LOC729683
215961_at	9.22e-11	7.03e-13	-63.6	20.389	-0.522632	F12	coagulation factor XII (Hageman factor)
239039_at	9.29e-11	7.1e-13	-63.5	20.3784	-0.55621
211398_at	9.31e-11	7.14e-13	63.5	20.3736	0.541551	FGFR2	fibroblast growth factor receptor 2
228864_at	9.32e-11	7.16e-13	63.5	20.37	0.70476	ZNF653	zinc finger protein 653
233767_at	9.43e-11	7.26e-13	63.4	20.355	0.698509	HHLA1	HERV-H LTR-associating 1
244307_s_at	9.44e-11	7.28e-13	63.4	20.3522	0.705391
231185_at	9.48e-11	7.33e-13	63.3	20.3455	0.53447	KIAA1161	KIAA1161
218690_at	9.53e-11	7.39e-13	-63.2	20.3374	-0.479409	PDLIM4	PDZ and LIM domain 4
227509_x_at	9.53e-11	7.41e-13	63.2	20.3347	1.62149
242329_at	9.66e-11	7.52e-13	-63.1	20.3184	-0.480116	LOC401317	uncharacterized LOC401317
211301_at	9.74e-11	7.61e-13	63	20.3069	0.515759	KCND3	potassium voltage-gated channel, Shal-related subfamily, member 3
206430_at	9.75e-11	7.63e-13	63	20.3039	0.631535	CDX1	caudal type homeobox 1
221366_at	9.77e-11	7.67e-13	63	20.2989	0.471364	NKX6-1	NK6 homeobox 1
224548_at	9.91e-11	7.8e-13	62.9	20.2812	0.532339	HES7	hairy and enhancer of split 7 (Drosophila)
228975_at	1.01e-10	7.94e-13	-62.7	20.2623	-0.463914	SP6	Sp6 transcription factor
213250_at	1.01e-10	7.97e-13	62.7	20.258	0.644503	CCDC85B	coiled-coil domain containing 85B
215582_x_at	1.01e-10	8e-13	62.7	20.2543	0.472208	MCM3AP	minichromosome maintenance complex component 3 associated protein
241974_at	1.02e-10	8.09e-13	-62.6	20.2419	-0.462942
242160_at	1.03e-10	8.16e-13	-62.5	20.2328	-0.62902
221889_at	1.03e-10	8.18e-13	62.5	20.2305	0.47135	KCTD13	potassium channel tetramerisation domain containing 13
207699_at	1.03e-10	8.21e-13	62.5	20.2271	1.39948	ZFHX2	zinc finger homeobox 2
227773_at	1.03e-10	8.22e-13	-62.5	20.2261	-1.02916	SAMD10	sterile alpha motif domain containing 10
217119_s_at	1.03e-10	8.31e-13	-62.4	20.215	-0.519455	CXCR3	chemokine (C-X-C motif) receptor 3
202400_s_at	1.04e-10	8.39e-13	-62.3	20.2041	-0.718284	SRF	serum response factor (c-fos serum response element-binding transcription factor)
205163_at	1.04e-10	8.4e-13	62.3	20.2027	0.464533	MYLPF	myosin light chain, phosphorylatable, fast skeletal muscle
204958_at	1.04e-10	8.43e-13	-62.3	20.1989	-0.532436	PLK3	polo-like kinase 3
207137_at	1.06e-10	8.61e-13	62.1	20.1766	0.546182	TONSL	tonsoku-like, DNA repair protein
234610_at	1.08e-10	8.8e-13	-62	20.1542	-0.408898	HSPA12B	heat shock 70kD protein 12B
226920_at	1.08e-10	8.81e-13	62	20.1533	1.22015
218390_s_at	1.08e-10	8.81e-13	62	20.1533	0.975555	FAM204A	family with sequence similarity 204, member A
239864_at	1.09e-10	8.93e-13	-61.9	20.1384	-0.506912	LOC100130175	uncharacterized LOC100130175
220056_at	1.09e-10	8.97e-13	61.8	20.1341	0.52028	IL22RA1	interleukin 22 receptor, alpha 1
206225_at	1.11e-10	9.12e-13	-61.7	20.1162	-0.465558	ZNF507	zinc finger protein 507
235861_at	1.15e-10	9.46e-13	61.5	20.0787	0.801213
1556806_at	1.15e-10	9.46e-13	-61.5	20.0782	-0.46358
240760_at	1.15e-10	9.47e-13	61.5	20.0769	1.07592	CDRT15	CMT1A duplicated region transcript 15
216061_x_at	1.17e-10	9.66e-13	61.3	20.0568	0.804129	PDGFB	platelet-derived growth factor beta polypeptide
235089_at	1.17e-10	9.71e-13	-61.3	20.0509	-0.587642	FBXL20	F-box and leucine-rich repeat protein 20
230530_at	1.17e-10	9.71e-13	-61.3	20.0508	-0.516363
1553690_at	1.18e-10	9.86e-13	61.2	20.0348	0.458339	SGOL1	shugoshin-like 1 (S. pombe)
215669_at	1.18e-10	9.86e-13	61.2	20.0346	0.581074	HLA-DRB4	major histocompatibility complex, class II, DR beta 4
210189_at	1.18e-10	9.9e-13	61.1	20.0305	0.814142	HSPA1L	heat shock 70kDa protein 1-like
206570_s_at	1.18e-10	9.93e-13	61.1	20.0276	0.844708	PSG11	pregnancy specific beta-1-glycoprotein 11
227302_s_at	1.18e-10	9.96e-13	-61.1	20.0242	-0.62987	LLGL1///FLII	lethal giant larvae homolog 1 (Drosophila)///flightless I homolog (Drosophila)
237235_at	1.18e-10	9.98e-13	-61.1	20.0227	-0.485317
1559254_at	1.18e-10	9.99e-13	-61.1	20.0208	-0.493594	LINC00162	long intergenic non-protein coding RNA 162
240860_at	1.18e-10	9.99e-13	61.1	20.0208	0.484448	LOC100506288	uncharacterized LOC100506288
1569302_at	1.18e-10	1e-12	61.1	20.0202	0.442651	KIAA1731	KIAA1731
1561719_at	1.18e-10	1e-12	61.1	20.02	0.624973
1557585_at	1.18e-10	1.01e-12	-61	20.0125	-0.612678	ATP6V1H	ATPase, H+ transporting, lysosomal 50/57kDa, V1 subunit H
1553205_at	1.18e-10	1.01e-12	-61	20.0124	-0.664408	C20orf166-AS1	C20orf166 antisense RNA 1
243145_at	1.2e-10	1.03e-12	-60.9	19.9907	-0.629681
1568977_at	1.21e-10	1.03e-12	60.8	19.9847	0.456398	RNASET2	ribonuclease T2
242687_at	1.21e-10	1.04e-12	-60.8	19.9828	-0.783876	FAM160A1	family with sequence similarity 160, member A1
215328_at	1.21e-10	1.04e-12	60.8	19.9772	0.527519	EFR3B	EFR3 homolog B (S. cerevisiae)
1570414_x_at	1.21e-10	1.05e-12	60.7	19.9717	0.586195	FLJ13197	uncharacterized FLJ13197
221603_at	1.22e-10	1.05e-12	-60.7	19.9642	-0.479197	PEX16	peroxisomal biogenesis factor 16
221394_at	1.22e-10	1.06e-12	-60.7	19.9634	-0.451904	TAAR2	trace amine associated receptor 2
219899_x_at	1.23e-10	1.07e-12	-60.6	19.9528	-0.535371	NDOR1	NADPH dependent diflavin oxidoreductase 1
1562722_at	1.24e-10	1.08e-12	-60.5	19.9364	-0.645218	PRR20E///PRR20D///PRR20C///PRR20B///PRR20A	proline rich 20E///proline rich 20D///proline rich 20C///proline rich 20B///proline rich 20A
222485_at	1.24e-10	1.08e-12	-60.5	19.9356	-0.605812	FKBP3	FK506 binding protein 3, 25kDa
211381_x_at	1.28e-10	1.12e-12	60.3	19.9045	0.554591	SPAG11B	sperm associated antigen 11B
215265_at	1.3e-10	1.14e-12	-60.2	19.8814	-0.490473	EMX1	empty spiracles homeobox 1
237653_at	1.31e-10	1.15e-12	60.1	19.8747	0.468671
229346_at	1.32e-10	1.16e-12	60	19.8641	0.790408	NES	nestin
91920_at	1.33e-10	1.18e-12	59.9	19.8502	0.469643	BCAN	brevican
228175_at	1.33e-10	1.18e-12	-59.9	19.8501	-1.50079	SLC4A8	solute carrier family 4, sodium bicarbonate cotransporter, member 8
207784_at	1.34e-10	1.19e-12	-59.9	19.838	-0.412846	ARSD	arylsulfatase D
209237_s_at	1.35e-10	1.2e-12	59.8	19.8323	0.41101	SLC23A2	solute carrier family 23 (nucleobase transporters), member 2
216776_at	1.36e-10	1.21e-12	59.8	19.8235	0.591906
232995_at	1.36e-10	1.21e-12	-59.7	19.8205	-0.670079
244671_at	1.36e-10	1.21e-12	59.7	19.8169	0.620605
1570568_at	1.37e-10	1.22e-12	59.7	19.8094	0.410159
215727_x_at	1.37e-10	1.23e-12	59.6	19.801	0.515595
237536_at	1.38e-10	1.24e-12	-59.6	19.7969	-1.27336	MAPT-AS1	MAPT antisense RNA 1
1570272_at	1.39e-10	1.25e-12	59.5	19.7876	0.538392
237718_at	1.4e-10	1.26e-12	59.5	19.7765	0.58993	EIF4E	eukaryotic translation initiation factor 4E
213697_at	1.4e-10	1.26e-12	-59.5	19.7762	-0.456544	HIPK3	homeodomain interacting protein kinase 3
242993_at	1.41e-10	1.28e-12	-59.4	19.7637	-0.553792
211295_x_at	1.44e-10	1.31e-12	59.2	19.7385	0.392457	CYP2A6	cytochrome P450, family 2, subfamily A, polypeptide 6
1564573_at	1.45e-10	1.32e-12	59.2	19.7315	0.496902	IFITM10	interferon induced transmembrane protein 10
1563489_at	1.45e-10	1.32e-12	59.1	19.7247	0.442047	LOC285638	uncharacterized LOC285638
210421_s_at	1.45e-10	1.33e-12	-59.1	19.7227	-0.730943	SLC24A1	solute carrier family 24 (sodium/potassium/calcium exchanger), member 1
52651_at	1.46e-10	1.33e-12	-59.1	19.7169	-0.504611	COL8A2	collagen, type VIII, alpha 2
234333_at	1.46e-10	1.34e-12	-59	19.7116	-0.625799	KIAA2022	KIAA2022
213323_s_at	1.47e-10	1.35e-12	-59	19.7024	-0.713025	ZC3H7B	zinc finger CCCH-type containing 7B
235468_at	1.48e-10	1.36e-12	58.9	19.6967	0.459184	RBFOX3	RNA binding protein, fox-1 homolog (C. elegans) 3
222626_at	1.49e-10	1.38e-12	58.9	19.6838	1.75064	RBM26	RNA binding motif protein 26
208532_x_at	1.52e-10	1.4e-12	-58.7	19.6637	-0.436484	KRTAP5-8	keratin associated protein 5-8
241680_at	1.53e-10	1.41e-12	-58.7	19.6567	-1.00034
1559508_at	1.53e-10	1.42e-12	-58.6	19.6501	-0.588867
1562648_at	1.54e-10	1.43e-12	58.6	19.6414	0.718435	CCDC88A	coiled-coil domain containing 88A
237642_at	1.54e-10	1.44e-12	58.6	19.6394	0.454489	CTBP1-AS2	CTBP1 antisense RNA 2 (head to head)
221464_at	1.55e-10	1.44e-12	-58.5	19.6326	-0.539416	OR1D2	olfactory receptor, family 1, subfamily D, member 2
220981_x_at	1.55e-10	1.45e-12	58.5	19.6264	0.505721	NXF2	nuclear RNA export factor 2
1560069_at	1.55e-10	1.46e-12	58.5	19.625	0.396864	PLEKHM3	pleckstrin homology domain containing, family M, member 3
229934_at	1.55e-10	1.46e-12	-58.5	19.6237	-0.491917
228902_at	1.58e-10	1.49e-12	-58.3	19.6018	-1.70702	NUP214	nucleoporin 214kDa
1569602_at	1.58e-10	1.49e-12	-58.3	19.5994	-1.24032	KANK2	KN motif and ankyrin repeat domains 2
1567166_at	1.59e-10	1.5e-12	58.3	19.59	0.450935
234687_x_at	1.6e-10	1.52e-12	58.2	19.5819	0.452041	LIMD1	LIM domains containing 1
233475_at	1.6e-10	1.52e-12	58.2	19.5817	0.491906
241415_at	1.6e-10	1.52e-12	58.2	19.5794	0.427065
220965_s_at	1.6e-10	1.52e-12	58.2	19.5761	0.684645	RSPH6A	radial spoke head 6 homolog A (Chlamydomonas)
1555546_a_at	1.6e-10	1.53e-12	-58.1	19.5728	-0.72142	POFUT2	protein O-fucosyltransferase 2
242684_at	1.6e-10	1.53e-12	58.1	19.5708	0.728005	ZNF425	zinc finger protein 425
1556136_at	1.61e-10	1.54e-12	58.1	19.5635	0.57803	MYLK4	myosin light chain kinase family, member 4
207954_at	1.61e-10	1.55e-12	58.1	19.5608	0.485995	GATA2	GATA binding protein 2
232284_at	1.63e-10	1.56e-12	58	19.5502	0.887447	PSMD6	proteasome (prosome, macropain) 26S subunit, non-ATPase, 6
216217_at	1.63e-10	1.57e-12	58	19.5466	1.02635	PLCL2	phospholipase C-like 2
239235_at	1.63e-10	1.57e-12	58	19.5432	0.521547
1554385_a_at	1.63e-10	1.57e-12	-58	19.5417	-0.453388	PADI2	peptidyl arginine deiminase, type II
231816_s_at	1.65e-10	1.59e-12	-57.9	19.5288	-0.689395	UBE2Q1	ubiquitin-conjugating enzyme E2Q family member 1
1556976_s_at	1.7e-10	1.65e-12	-57.6	19.4925	-0.566068
243926_at	1.73e-10	1.68e-12	-57.5	19.4729	-0.493515
212821_at	1.73e-10	1.69e-12	57.5	19.4694	0.51594	PLEKHG3	pleckstrin homology domain containing, family G (with RhoGef domain) member 3
1556567_at	1.79e-10	1.74e-12	57.3	19.4359	0.55416	NAP1L4	nucleosome assembly protein 1-like 4
216114_at	1.79e-10	1.75e-12	57.2	19.4285	0.681329	NCKIPSD	NCK interacting protein with SH3 domain
233776_at	1.8e-10	1.76e-12	57.2	19.4214	0.471175	PTPRA	protein tyrosine phosphatase, receptor type, A
230553_at	1.82e-10	1.78e-12	-57.1	19.4116	-0.554727	PRDM15	PR domain containing 15
44822_s_at	1.83e-10	1.79e-12	-57.1	19.4043	-0.475061	MIER2	mesoderm induction early response 1, family member 2
220558_x_at	1.85e-10	1.82e-12	-57	19.3872	-0.83392	TSPAN32	tetraspanin 32
1561571_at	1.88e-10	1.86e-12	-56.9	19.367	-0.79593	LOC730139	uncharacterized LOC730139
243022_at	1.9e-10	1.88e-12	-56.8	19.3544	-0.588114	LOC100506631	uncharacterized LOC100506631
1557258_a_at	1.9e-10	1.88e-12	-56.8	19.3534	-0.466861	BCL10	B-cell CLL/lymphoma 10
234206_at	1.9e-10	1.89e-12	-56.7	19.3499	-0.508513
234376_at	1.91e-10	1.9e-12	56.7	19.3426	0.475751	MYCN	v-myc myelocytomatosis viral related oncogene, neuroblastoma derived (avian)
207192_at	1.91e-10	1.91e-12	-56.7	19.3383	-0.457322	DNASE1L2	deoxyribonuclease I-like 2
239173_at	1.91e-10	1.91e-12	56.7	19.3379	0.431646	INADL	InaD-like (Drosophila)
1563339_at	1.91e-10	1.92e-12	56.7	19.3345	0.665609
239000_at	1.91e-10	1.92e-12	56.7	19.3345	0.626867	BRD4	bromodomain containing 4
215400_x_at	1.96e-10	1.96e-12	56.5	19.3097	0.586683	ADCY9	adenylate cyclase 9
239213_at	1.99e-10	2e-12	-56.4	19.2898	-0.500518	SERPINB1	serpin peptidase inhibitor, clade B (ovalbumin), member 1
232827_at	2e-10	2.02e-12	-56.3	19.2798	-0.483236
1560879_a_at	2.05e-10	2.07e-12	56.2	19.254	0.543495	SYT15	synaptotagmin XV
231004_s_at	2.07e-10	2.09e-12	-56.1	19.2398	-1.43331	H1FX	H1 histone family, member X
221298_s_at	2.07e-10	2.1e-12	-56.1	19.2394	-0.529083	SLC22A8	solute carrier family 22 (organic anion transporter), member 8
208301_at	2.08e-10	2.11e-12	56	19.2313	1.11121
1554974_at	2.09e-10	2.12e-12	-56	19.2271	-0.439476	ACY3	aspartoacylase (aminocyclase) 3
244381_at	2.09e-10	2.12e-12	-56	19.2252	-0.579953
219710_at	2.12e-10	2.16e-12	55.9	19.2091	0.515472	SH3TC2	SH3 domain and tetratricopeptide repeats 2
1555078_at	2.12e-10	2.16e-12	55.9	19.2053	0.442756	ZNF843	zinc finger protein 843
221673_s_at	2.12e-10	2.17e-12	55.8	19.2028	0.421388	CSNK1G1	casein kinase 1, gamma 1
206743_s_at	2.13e-10	2.18e-12	-55.8	19.1977	-0.424918	ASGR1	asialoglycoprotein receptor 1
239272_at	2.14e-10	2.19e-12	-55.8	19.1916	-0.676135	MMP28	matrix metallopeptidase 28
214592_s_at	2.14e-10	2.2e-12	-55.8	19.1876	-0.619924	SNAPC5	small nuclear RNA activating complex, polypeptide 5, 19kDa
229320_at	2.14e-10	2.2e-12	55.7	19.1871	0.505604	KIAA1211L	KIAA1211-like
1569325_at	2.15e-10	2.22e-12	55.7	19.1797	0.450563	ARPC5	actin related protein 2/3 complex, subunit 5, 16kDa
241918_at	2.15e-10	2.22e-12	-55.7	19.1776	-0.407952	ANO7	anoctamin 7
1566646_at	2.16e-10	2.24e-12	-55.6	19.1676	-0.491848	LOC149086	ornithine decarboxylase 1 pseudogene
1552558_a_at	2.16e-10	2.24e-12	55.6	19.1664	0.403469	RAI1	retinoic acid induced 1
208590_x_at	2.19e-10	2.28e-12	-55.5	19.1511	-0.483435	GJA3	gap junction protein, alpha 3, 46kDa
1560212_a_at	2.2e-10	2.29e-12	-55.5	19.1447	-0.479985
213847_at	2.26e-10	2.35e-12	-55.3	19.1171	-0.423228	PRPH	peripherin
217953_at	2.27e-10	2.37e-12	55.3	19.1067	0.60227	PHF3	PHD finger protein 3
209637_s_at	2.28e-10	2.39e-12	55.2	19.1017	1.26875	RGS12	regulator of G-protein signaling 12
1553968_a_at	2.28e-10	2.39e-12	55.2	19.1012	0.832818	ADAT3	adenosine deaminase, tRNA-specific 3
233339_s_at	2.28e-10	2.39e-12	55.2	19.0996	0.408231	ARID1B	AT rich interactive domain 1B (SWI1-like)
223887_at	2.3e-10	2.42e-12	55.1	19.0849	0.845706	GPR132	G protein-coupled receptor 132
230801_at	2.37e-10	2.49e-12	55	19.0546	0.591559	RPRD1B	regulation of nuclear pre-mRNA domain containing 1B
1564281_at	2.37e-10	2.5e-12	54.9	19.053	0.419984	LINC00491	long intergenic non-protein coding RNA 491
238527_at	2.37e-10	2.51e-12	54.9	19.0483	0.540509
235370_at	2.37e-10	2.52e-12	-54.9	19.045	-1.80843	KREMEN1	kringle containing transmembrane protein 1
221713_s_at	2.37e-10	2.52e-12	-54.9	19.0445	-0.401896	MAP6D1	MAP6 domain containing 1
1553785_at	2.45e-10	2.6e-12	-54.7	19.0096	-1.2831	RASGEF1B	RasGEF domain family, member 1B
239615_at	2.45e-10	2.6e-12	-54.7	19.0088	-0.510777
217672_x_at	2.46e-10	2.62e-12	54.6	19.0029	1.34459	EIF1	eukaryotic translation initiation factor 1
227844_at	2.5e-10	2.67e-12	-54.5	18.9819	-0.500101	FMNL3	formin-like 3
1559812_at	2.5e-10	2.68e-12	-54.5	18.9792	-0.496871
233530_at	2.54e-10	2.72e-12	54.4	18.9609	0.601944	SDCBP2-AS1	SDCBP2 antisense RNA 1
208160_at	2.56e-10	2.75e-12	-54.3	18.9514	-0.603805
1560790_at	2.58e-10	2.78e-12	54.3	18.9407	0.95571	GOLGA6L2	golgin A6 family-like 2
237165_at	2.59e-10	2.79e-12	54.2	18.935	0.440178
242946_at	2.63e-10	2.84e-12	-54.1	18.915	-0.595063
222110_at	2.63e-10	2.85e-12	-54.1	18.9145	-0.595225	SENP5	SUMO1/sentrin specific peptidase 5
215748_at	2.65e-10	2.87e-12	-54.1	18.9045	-0.502146	KLHL35	kelch-like family member 35
237736_at	2.66e-10	2.89e-12	54	18.897	0.409958
234720_s_at	2.66e-10	2.89e-12	-54	18.8962	-0.485059	TOB2	transducer of ERBB2, 2
216400_at	2.66e-10	2.9e-12	54	18.894	0.620572	GBAP1///GBA	glucosidase, beta, acid pseudogene 1///glucosidase, beta, acid
220862_s_at	2.66e-10	2.9e-12	54	18.8931	0.381086	USP22	ubiquitin specific peptidase 22
235941_s_at	2.68e-10	2.92e-12	-54	18.8862	-0.430219	FAM224A	family with sequence similarity 224, member A (non-protein coding)
216282_x_at	2.69e-10	2.94e-12	-53.9	18.8808	-0.472657	POLR2C	polymerase (RNA) II (DNA directed) polypeptide C, 33kDa
1569474_at	2.7e-10	2.96e-12	-53.9	18.8723	-0.522342
1569246_a_at	2.74e-10	3.01e-12	-53.8	18.8561	-0.418345	C8orf74	chromosome 8 open reading frame 74
223508_at	2.74e-10	3.01e-12	53.8	18.8536	0.456557	NOTCH1	notch 1
230157_at	2.76e-10	3.04e-12	53.7	18.8458	0.43958	CDH24	cadherin 24, type 2
232801_at	2.77e-10	3.05e-12	53.7	18.8398	1.22487	ERCC6L2	excision repair cross-complementing rodent repair deficiency, complementation group 6-like 2
202285_s_at	2.85e-10	3.15e-12	53.5	18.8075	0.481605	TACSTD2	tumor-associated calcium signal transducer 2
1557707_at	2.86e-10	3.17e-12	53.5	18.8006	0.5151
1570447_at	2.86e-10	3.17e-12	53.4	18.7995	0.401831	LINC00452	long intergenic non-protein coding RNA 452
231388_at	2.86e-10	3.17e-12	53.4	18.7983	0.468988	ZNF318	zinc finger protein 318
236595_at	2.87e-10	3.19e-12	-53.4	18.7915	-0.528197	LOC100507307	uncharacterized LOC100507307
230855_at	2.87e-10	3.2e-12	-53.4	18.791	-0.426547	GATA4	GATA binding protein 4
240487_at	2.87e-10	3.2e-12	53.4	18.7901	0.746267
1569815_x_at	2.87e-10	3.21e-12	-53.4	18.7876	-1.01229	STRN	striatin, calmodulin binding protein
203975_s_at	2.87e-10	3.22e-12	53.4	18.7841	0.439576	CHAF1A	chromatin assembly factor 1, subunit A (p150)
238353_at	2.88e-10	3.23e-12	53.3	18.7781	0.546029	RASL11A	RAS-like, family 11, member A
234298_at	2.92e-10	3.28e-12	53.2	18.7633	0.462207	MYCN	v-myc myelocytomatosis viral related oncogene, neuroblastoma derived (avian)
229326_at	2.96e-10	3.33e-12	-53.2	18.7483	-0.639321	TNFSF13	tumor necrosis factor (ligand) superfamily, member 13
241148_at	2.97e-10	3.35e-12	53.1	18.7411	0.426714	ACTG2	actin, gamma 2, smooth muscle, enteric
232357_at	2.97e-10	3.35e-12	-53.1	18.7393	-0.905189	TTLL9	tubulin tyrosine ligase-like family, member 9
233623_at	2.98e-10	3.37e-12	53.1	18.7356	0.84726
207960_at	2.98e-10	3.38e-12	53.1	18.7326	0.380463
1552456_a_at	2.98e-10	3.38e-12	53.1	18.7319	0.536311	MBD3L2	methyl-CpG binding domain protein 3-like 2
222871_at	2.98e-10	3.39e-12	-53	18.7283	-0.37055	KLHDC8A	kelch domain containing 8A
240340_at	2.98e-10	3.4e-12	-53	18.7263	-0.479255	SPATA3	spermatogenesis associated 3
230648_at	3.05e-10	3.47e-12	-52.9	18.7024	-0.348086	LINC00926	long intergenic non-protein coding RNA 926
220838_at	3.07e-10	3.5e-12	-52.8	18.6939	-0.55914	EXD3	exonuclease 3'-5' domain containing 3
232359_at	3.09e-10	3.53e-12	52.8	18.6845	1.87429	RDH11	retinol dehydrogenase 11 (all-trans/9-cis/11-cis)
220427_at	3.09e-10	3.54e-12	52.8	18.6809	0.423516	OBSCN	obscurin, cytoskeletal calmodulin and titin-interacting RhoGEF
234881_at	3.11e-10	3.57e-12	52.7	18.6726	0.597962
205249_at	3.12e-10	3.58e-12	52.7	18.6689	0.999087	EGR2	early growth response 2
224307_x_at	3.17e-10	3.64e-12	-52.6	18.651	-0.675354	MAGI3	membrane associated guanylate kinase, WW and PDZ domain containing 3
206712_at	3.21e-10	3.7e-12	-52.5	18.6338	-0.436692	GRTP1	growth hormone regulated TBC protein 1
241976_at	3.21e-10	3.71e-12	52.5	18.6327	0.391733	TCEA3	transcription elongation factor A (SII), 3
216311_at	3.27e-10	3.78e-12	-52.4	18.6128	-0.410843	OVOL3	ovo-like 3 (Drosophila)
234316_x_at	3.3e-10	3.82e-12	-52.3	18.601	-0.434907	KLK12	kallikrein-related peptidase 12
1565612_at	3.35e-10	3.89e-12	52.2	18.581	0.413105	DYNLRB1	dynein, light chain, roadblock-type 1
243988_at	3.35e-10	3.89e-12	-52.2	18.5802	-0.548227
214135_at	3.36e-10	3.91e-12	52.2	18.5764	0.432614	CLDN18	claudin 18
1557889_at	3.41e-10	3.97e-12	-52.1	18.5604	-1.04801
215492_x_at	3.43e-10	4e-12	52	18.5523	0.359092	PTCRA	pre T-cell antigen receptor alpha
211880_x_at	3.45e-10	4.03e-12	52	18.5424	0.437855	PCDHGA1	protocadherin gamma subfamily A, 1
238674_at	3.45e-10	4.04e-12	-52	18.5409	-0.621938
227387_at	3.46e-10	4.05e-12	52	18.538	0.348386	NSMCE4A	non-SMC element 4 homolog A (S. cerevisiae)
1553163_at	3.47e-10	4.07e-12	-51.9	18.5318	-0.557656	ADPRHL1	ADP-ribosylhydrolase like 1
1558289_at	3.52e-10	4.14e-12	-51.8	18.5139	-0.398938	RFT1	RFT1 homolog (S. cerevisiae)
244818_at	3.55e-10	4.18e-12	51.8	18.5056	0.394449	ZNF780B	zinc finger protein 780B
238482_at	3.57e-10	4.21e-12	-51.7	18.496	-1.09199	KLF7	Kruppel-like factor 7 (ubiquitous)
217013_at	3.57e-10	4.21e-12	-51.7	18.4958	-0.489467	AZGP1P1	alpha-2-glycoprotein 1, zinc-binding pseudogene 1
1552396_at	3.61e-10	4.27e-12	51.6	18.4812	0.933537	WFDC6	WAP four-disulfide core domain 6
1558762_a_at	3.62e-10	4.29e-12	51.6	18.4771	1.14495	ZNF789	zinc finger protein 789
215623_x_at	3.64e-10	4.32e-12	51.6	18.4691	0.710602	SMC4	structural maintenance of chromosomes 4
1558007_s_at	3.71e-10	4.41e-12	51.4	18.4473	0.459635	LOC100506655	uncharacterized LOC100506655
208008_at	3.73e-10	4.45e-12	51.4	18.438	0.40386	TBC1D29	TBC1 domain family, member 29
205325_at	3.73e-10	4.45e-12	-51.4	18.4376	-0.734492	PHYHIP	phytanoyl-CoA 2-hydroxylase interacting protein
208417_at	3.74e-10	4.46e-12	51.4	18.4346	1.38848	FGF6	fibroblast growth factor 6
239535_at	3.74e-10	4.48e-12	-51.4	18.4309	-0.49196
1556925_at	3.8e-10	4.55e-12	51.3	18.4146	0.408118	SMC3	structural maintenance of chromosomes 3
1552854_a_at	3.81e-10	4.57e-12	-51.2	18.409	-0.457024	VWA5B1	von Willebrand factor A domain containing 5B1
237605_at	3.82e-10	4.59e-12	-51.2	18.4056	-0.552895
211837_s_at	3.82e-10	4.6e-12	51.2	18.4027	0.521654	PTCRA	pre T-cell antigen receptor alpha
234077_at	3.82e-10	4.62e-12	-51.2	18.3985	-0.527554
240615_at	3.82e-10	4.62e-12	51.2	18.3981	0.640319	PTOV1-AS1	PTOV1 antisense RNA 1
1555485_s_at	3.82e-10	4.62e-12	-51.2	18.3973	-0.483054	FAM153B	family with sequence similarity 153, member B
210537_s_at	3.83e-10	4.64e-12	51.1	18.3928	0.631661	TADA2A	transcriptional adaptor 2A
1561484_at	3.87e-10	4.69e-12	51.1	18.3823	0.455935
237603_at	3.88e-10	4.72e-12	51	18.3754	0.426661	C1orf100	chromosome 1 open reading frame 100
1564816_at	3.9e-10	4.74e-12	-51	18.3706	-0.366817	C14orf178	chromosome 14 open reading frame 178
1556205_at	3.92e-10	4.77e-12	-51	18.3633	-0.490507
211603_s_at	3.92e-10	4.78e-12	51	18.3618	0.527898	ETV4	ets variant 4
1560694_at	3.92e-10	4.79e-12	51	18.3582	0.387239	SFT2D1	SFT2 domain containing 1
244001_at	3.93e-10	4.81e-12	-50.9	18.3539	-0.431729	NAP1L4	nucleosome assembly protein 1-like 4
242151_at	3.95e-10	4.84e-12	-50.9	18.3485	-0.45385
1560897_a_at	3.96e-10	4.86e-12	-50.9	18.3445	-0.444356	KRTAP10-11	keratin associated protein 10-11
241630_at	3.98e-10	4.9e-12	50.8	18.3354	0.381227
1568625_at	3.99e-10	4.91e-12	50.8	18.3325	0.550663	LOC100505997	uncharacterized LOC100505997
226549_at	3.99e-10	4.92e-12	50.8	18.3305	0.436621	SBK1	SH3-binding domain kinase 1
207244_x_at	3.99e-10	4.92e-12	-50.8	18.3301	-0.523608	CYP2A6	cytochrome P450, family 2, subfamily A, polypeptide 6
240023_at	3.99e-10	4.94e-12	-50.8	18.3267	-0.41297
224421_x_at	3.99e-10	4.94e-12	-50.8	18.326	-0.390987	PMCHL1	pro-melanin-concentrating hormone-like 1, pseudogene
1566678_at	4.04e-10	5.01e-12	50.7	18.3102	0.558997	MMP2	matrix metallopeptidase 2 (gelatinase A, 72kDa gelatinase, 72kDa type IV collagenase)
231474_at	4.04e-10	5.01e-12	-50.7	18.3102	-0.392973	KHDC3L	KH domain containing 3-like, subcortical maternal complex member
1552725_s_at	4.04e-10	5.03e-12	-50.7	18.3075	-0.434465	ADAMTS17	ADAM metallopeptidase with thrombospondin type 1 motif, 17
211691_x_at	4.09e-10	5.1e-12	50.6	18.2926	0.361141
1561208_at	4.1e-10	5.12e-12	50.6	18.2881	0.577637
236017_at	4.19e-10	5.23e-12	50.4	18.2649	0.615049	CDKL3	cyclin-dependent kinase-like 3
241577_at	4.21e-10	5.27e-12	50.4	18.2563	0.377196
220747_at	4.22e-10	5.28e-12	50.4	18.2544	0.355148	LINC00652	long intergenic non-protein coding RNA 652
221450_x_at	4.29e-10	5.38e-12	50.3	18.234	0.437009	PCDHB13	protocadherin beta 13
216275_at	4.31e-10	5.41e-12	50.2	18.2284	0.386174	BUB1	BUB1 mitotic checkpoint serine/threonine kinase
1564787_at	4.32e-10	5.44e-12	50.2	18.2235	0.482017	LOC643923	uncharacterized LOC643923
216340_s_at	4.32e-10	5.45e-12	50.2	18.2211	0.441752	CYP2A7P1	cytochrome P450, family 2, subfamily A, polypeptide 7 pseudogene 1
244333_at	4.32e-10	5.45e-12	-50.2	18.2211	-1.14913
1570331_at	4.36e-10	5.51e-12	-50.1	18.2089	-0.604995
236997_at	4.38e-10	5.54e-12	50.1	18.2027	0.405669	LOC100505554	uncharacterized LOC100505554
1560977_a_at	4.39e-10	5.57e-12	50.1	18.1977	0.527527	BCL2L13	BCL2-like 13 (apoptosis facilitator)
232892_at	4.42e-10	5.61e-12	-50	18.19	-1.58027	C20orf166	chromosome 20 open reading frame 166
233943_x_at	4.46e-10	5.67e-12	-50	18.1789	-0.539777	PLEKHA8	pleckstrin homology domain containing, family A (phosphoinositide binding specific) member 8
211918_x_at	4.46e-10	5.67e-12	-50	18.1778	-0.651848	PAPPA2	pappalysin 2
230810_at	4.49e-10	5.73e-12	-49.9	18.1676	-0.395857	JMJD4	jumonji domain containing 4
1558889_at	4.5e-10	5.74e-12	-49.9	18.1649	-0.38599
222337_at	4.5e-10	5.76e-12	-49.9	18.1626	-0.639064
217548_at	4.5e-10	5.77e-12	49.9	18.1605	0.635587
220671_at	4.51e-10	5.78e-12	49.9	18.1579	0.339281	CCRN4L	CCR4 carbon catabolite repression 4-like (S. cerevisiae)
209547_s_at	4.51e-10	5.8e-12	49.8	18.1551	1.76099	SUGP1	SURP and G patch domain containing 1
1565844_at	4.52e-10	5.82e-12	49.8	18.151	0.490605	BRPF3	bromodomain and PHD finger containing, 3
1560548_at	4.52e-10	5.83e-12	-49.8	18.1484	-0.746645
1569624_at	4.52e-10	5.84e-12	49.8	18.1474	0.415074
210515_at	4.52e-10	5.84e-12	49.8	18.1464	1.19544	HNF1A	HNF1 homeobox A
206971_at	4.55e-10	5.88e-12	-49.8	18.1396	-0.75724	GPR161	G protein-coupled receptor 161
211867_s_at	4.55e-10	5.9e-12	49.7	18.1368	0.368338	PCDHA10	protocadherin alpha 10
236643_s_at	4.56e-10	5.92e-12	49.7	18.1329	0.446341	LOC645321	uncharacterized LOC645321
237226_at	4.62e-10	6e-12	49.6	18.118	0.496015
220875_at	4.63e-10	6.02e-12	49.6	18.1144	0.449191
1561960_at	4.69e-10	6.1e-12	49.5	18.1	0.375231	CSPG4P5	chondroitin sulfate proteoglycan 4 pseudogene 5
210098_s_at	4.69e-10	6.12e-12	49.5	18.0966	0.712502
214344_at	4.69e-10	6.12e-12	49.5	18.0959	0.458814	LINC00950	long intergenic non-protein coding RNA 950
239816_at	4.73e-10	6.19e-12	49.5	18.0854	0.364646	POLD3	polymerase (DNA-directed), delta 3, accessory subunit
241584_at	4.73e-10	6.2e-12	-49.5	18.083	-0.40165
1554188_at	4.75e-10	6.23e-12	49.4	18.0775	0.468142	C11orf53	chromosome 11 open reading frame 53
227175_at	4.78e-10	6.28e-12	49.4	18.0686	0.37693	MCL1	myeloid cell leukemia sequence 1 (BCL2-related)
233553_at	4.82e-10	6.34e-12	49.3	18.0592	0.62406
1559057_at	4.82e-10	6.35e-12	-49.3	18.058	-0.565595
1560550_at	4.84e-10	6.38e-12	49.3	18.0521	0.427351
1556665_at	4.9e-10	6.47e-12	49.2	18.0367	0.780294	TTC6	tetratricopeptide repeat domain 6
235087_at	4.93e-10	6.52e-12	-49.2	18.0296	-0.505854	UNKL	unkempt homolog (Drosophila)-like
230052_s_at	4.96e-10	6.56e-12	-49.1	18.0219	-0.488065	NFKBID	nuclear factor of kappa light polypeptide gene enhancer in B-cells inhibitor, delta
206427_s_at	4.96e-10	6.58e-12	-49.1	18.0192	-0.41636	MLANA	melan-A
209841_s_at	5.01e-10	6.65e-12	-49.1	18.0074	-0.453933	LRRN3	leucine rich repeat neuronal 3
215685_s_at	5.01e-10	6.67e-12	49	18.0044	0.402211	DLX2	distal-less homeobox 2
224118_at	5.01e-10	6.68e-12	-49	18.0034	-0.349775	UBE2B	ubiquitin-conjugating enzyme E2B
1556636_at	5.05e-10	6.73e-12	-49	17.9946	-0.552585
220896_at	5.05e-10	6.75e-12	-49	17.9924	-0.366078	FBXL18	F-box and leucine-rich repeat protein 18
1553083_at	5.05e-10	6.75e-12	49	17.9914	0.374096
1552586_at	5.09e-10	6.81e-12	48.9	17.9824	0.418179	TRPV3	transient receptor potential cation channel, subfamily V, member 3
1554796_at	5.1e-10	6.84e-12	48.9	17.978	0.399332	DPP6	dipeptidyl-peptidase 6
215319_at	5.15e-10	6.92e-12	48.8	17.9646	0.400506	ATP8B3	ATPase, aminophospholipid transporter, class I, type 8B, member 3
234575_at	5.15e-10	6.93e-12	48.8	17.9638	0.339931	ZNF71	zinc finger protein 71
220950_s_at	5.16e-10	6.95e-12	-48.8	17.9601	-0.412965	KANSL3	KAT8 regulatory NSL complex subunit 3
1557848_at	5.17e-10	6.96e-12	48.8	17.9582	0.347904
208416_s_at	5.21e-10	7.03e-12	-48.7	17.9478	-0.341901	SPTB	spectrin, beta, erythrocytic
215205_x_at	5.24e-10	7.09e-12	48.7	17.9392	0.495045	NCOR2	nuclear receptor corepressor 2
231110_at	5.26e-10	7.13e-12	-48.7	17.9335	-0.834042
207484_s_at	5.26e-10	7.13e-12	-48.7	17.9333	-1.5026	EHMT2	euchromatic histone-lysine N-methyltransferase 2
237316_at	5.31e-10	7.21e-12	48.6	17.921	0.374243	ANKDD1A	ankyrin repeat and death domain containing 1A
1559075_s_at	5.34e-10	7.27e-12	48.6	17.9124	0.482276	BAHCC1	BAH domain and coiled-coil containing 1
222598_s_at	5.34e-10	7.27e-12	48.6	17.912	2.09914	NAV2	neuron navigator 2
214676_x_at	5.34e-10	7.28e-12	48.5	17.9107	0.389897	MUC3A	mucin 3A, cell surface associated
237451_x_at	5.4e-10	7.37e-12	-48.5	17.8974	-0.594512
1556593_s_at	5.4e-10	7.38e-12	48.5	17.8965	0.896389
238910_at	5.4e-10	7.39e-12	-48.5	17.8948	-0.426781
233495_at	5.4e-10	7.39e-12	48.5	17.8944	0.783139	EXOSC3	exosome component 3
241920_x_at	5.4e-10	7.42e-12	48.4	17.8907	0.549457	SPG11	spastic paraplegia 11 (autosomal recessive)
1557025_a_at	5.4e-10	7.43e-12	48.4	17.8891	0.488895
235417_at	5.4e-10	7.43e-12	-48.4	17.8882	-0.699142	SPOCD1	SPOC domain containing 1
232888_at	5.4e-10	7.44e-12	-48.4	17.8869	-0.459564	ISM1	isthmin 1, angiogenesis inhibitor
230159_at	5.41e-10	7.46e-12	-48.4	17.8845	-0.466402	C1orf115	chromosome 1 open reading frame 115
239707_at	5.41e-10	7.47e-12	48.4	17.8834	0.8263	SLC5A10	solute carrier family 5 (sodium/glucose cotransporter), member 10
213770_at	5.43e-10	7.5e-12	48.4	17.878	0.375013	KSR1	kinase suppressor of ras 1
232835_at	5.44e-10	7.53e-12	48.4	17.8749	0.475977
205297_s_at	5.46e-10	7.57e-12	-48.3	17.869	-2.11531	CD79B	CD79b molecule, immunoglobulin-associated beta
216926_s_at	5.5e-10	7.64e-12	48.3	17.8588	0.475467	MAU2	MAU2 chromatid cohesion factor homolog (C. elegans)
230476_at	5.58e-10	7.76e-12	48.2	17.8421	0.410049
233077_at	5.59e-10	7.78e-12	-48.2	17.84	-0.421284	NAV2-AS4	NAV2 antisense RNA 4
1555499_a_at	5.66e-10	7.89e-12	-48.1	17.8238	-0.388445	IFNLR1	interferon, lambda receptor 1
221244_s_at	5.71e-10	7.96e-12	-48	17.8143	-0.43261	PDPK1	3-phosphoinositide dependent protein kinase-1
221982_x_at	5.73e-10	8.01e-12	-48	17.8082	-0.432333	LAGE3	L antigen family, member 3
41387_r_at	5.81e-10	8.13e-12	-47.9	17.7918	-1.05916	KDM6B	lysine (K)-specific demethylase 6B
215916_at	5.81e-10	8.14e-12	47.9	17.7902	0.47118	CHRNE	cholinergic receptor, nicotinic, epsilon (muscle)
1556824_at	5.81e-10	8.15e-12	-47.9	17.7892	-0.638567
244127_at	5.81e-10	8.16e-12	47.9	17.7876	0.47244
237485_at	5.9e-10	8.3e-12	-47.8	17.7696	-0.401184	SRSF3	serine/arginine-rich splicing factor 3
1555569_a_at	5.93e-10	8.35e-12	-47.8	17.7638	-0.365801	KCTD7	potassium channel tetramerisation domain containing 7
214904_at	5.93e-10	8.37e-12	47.8	17.7612	0.442791	ZNF41	zinc finger protein 41
232866_at	5.95e-10	8.4e-12	47.7	17.757	0.627394	ZSCAN18	zinc finger and SCAN domain containing 18
216864_at	5.96e-10	8.42e-12	-47.7	17.7541	-0.36845
204878_s_at	5.96e-10	8.44e-12	47.7	17.752	0.348802	TAOK2	TAO kinase 2
220695_at	6.1e-10	8.65e-12	47.6	17.726	0.449274
210441_at	6.13e-10	8.71e-12	47.5	17.7178	0.663274	CDC14A	cell division cycle 14A
214885_at	6.13e-10	8.72e-12	-47.5	17.7163	-0.363617	KAT8	K(lysine) acetyltransferase 8
232792_at	6.13e-10	8.73e-12	-47.5	17.7157	-0.35446	TRIM69	tripartite motif containing 69
220628_s_at	6.19e-10	8.83e-12	-47.5	17.7034	-0.456285	SDK2	sidekick cell adhesion molecule 2
213950_s_at	6.19e-10	8.83e-12	-47.5	17.7034	-0.502748
238749_at	6.19e-10	8.86e-12	-47.5	17.6998	-0.343561
228430_at	6.19e-10	8.86e-12	-47.5	17.6997	-0.755015	BOLA3-AS1	BOLA3 antisense RNA 1 (head to head)
214445_at	6.2e-10	8.87e-12	-47.4	17.6982	-0.362211	ELL2	elongation factor, RNA polymerase II, 2
215266_at	6.2e-10	8.89e-12	47.4	17.696	0.377082	DNAH3	dynein, axonemal, heavy chain 3
207787_at	6.2e-10	8.9e-12	47.4	17.695	0.373187	KRT33B	keratin 33B
208484_at	6.28e-10	9.02e-12	47.4	17.6799	0.44077	HIST1H1A	histone cluster 1, H1a
216545_at	6.28e-10	9.04e-12	47.3	17.6777	0.393673
1557362_at	6.28e-10	9.05e-12	-47.3	17.6771	-0.411668	PHIP	pleckstrin homology domain interacting protein
214309_s_at	6.36e-10	9.17e-12	-47.3	17.6624	-0.406536
240097_at	6.37e-10	9.21e-12	-47.2	17.6577	-0.349574
223694_at	6.37e-10	9.22e-12	-47.2	17.6566	-0.466709	TRIM7	tripartite motif containing 7
243706_at	6.39e-10	9.26e-12	-47.2	17.6526	-0.423496
238301_at	6.39e-10	9.27e-12	-47.2	17.651	-0.599913
231047_at	6.42e-10	9.33e-12	-47.2	17.6445	-0.576357
230952_at	6.47e-10	9.4e-12	-47.1	17.6356	-0.573643	RRN3P2	RNA polymerase I transcription factor homolog (S. cerevisiae) pseudogene 2
1552592_at	6.48e-10	9.43e-12	-47.1	17.6326	-0.644826	MMP21	matrix metallopeptidase 21
208557_at	6.53e-10	9.52e-12	-47.1	17.6221	-0.364195	HOXA6	homeobox A6
240495_at	6.55e-10	9.56e-12	-47	17.6176	-0.59988
236906_x_at	6.58e-10	9.61e-12	47	17.6123	0.456629
214229_at	6.62e-10	9.69e-12	-47	17.6031	-0.43674	DNAH17	dynein, axonemal, heavy chain 17
215745_at	6.63e-10	9.71e-12	-47	17.6006	-0.464223
244440_at	6.64e-10	9.74e-12	-46.9	17.5976	-0.791586
229911_at	6.65e-10	9.76e-12	46.9	17.5952	0.576749	TPM2	tropomyosin 2 (beta)
235781_at	6.68e-10	9.82e-12	46.9	17.5894	0.477435	CACNA1B	calcium channel, voltage-dependent, N type, alpha 1B subunit
208129_x_at	6.74e-10	9.92e-12	46.8	17.5785	0.395238	RUNX1	runt-related transcription factor 1
206974_at	6.76e-10	9.97e-12	-46.8	17.5728	-0.384688	CXCR6	chemokine (C-X-C motif) receptor 6
1559352_a_at	6.89e-10	1.02e-11	46.7	17.552	0.390849	MAFG-AS1	MAFG antisense RNA 1 (head to head)
211326_x_at	6.96e-10	1.03e-11	46.6	17.5393	1.18946	HFE	hemochromatosis
224498_x_at	7.01e-10	1.04e-11	46.6	17.53	1.62564	AXIN2	axin 2
1555222_a_at	7.05e-10	1.04e-11	46.6	17.5226	0.507237
1555503_a_at	7.09e-10	1.05e-11	46.5	17.5153	0.351847	TMCC2	transmembrane and coiled-coil domain family 2
1555614_at	7.14e-10	1.06e-11	46.5	17.5066	0.432052	SUGT1P1	suppressor of G2 allele of SKP1 (S. cerevisiae) pseudogene 1
237986_at	7.29e-10	1.08e-11	46.4	17.4822	0.677017
232241_at	7.32e-10	1.09e-11	-46.3	17.4776	-0.44839
1556015_a_at	7.35e-10	1.1e-11	-46.3	17.4713	-0.478796	MESP2	mesoderm posterior 2 homolog (mouse)
207413_s_at	7.39e-10	1.1e-11	46.3	17.4635	0.946842	SCN5A	sodium channel, voltage-gated, type V, alpha subunit
1559188_x_at	7.4e-10	1.11e-11	46.3	17.4611	0.448758
215987_at	7.44e-10	1.11e-11	46.2	17.4537	0.786511	RAPGEF2	Rap guanine nucleotide exchange factor (GEF) 2
243752_s_at	7.44e-10	1.11e-11	-46.2	17.4533	-0.454266	CYTH3	cytohesin 3
221915_s_at	7.5e-10	1.13e-11	46.2	17.4423	0.474664	RANBP1	RAN binding protein 1
244627_at	7.52e-10	1.13e-11	46.1	17.4389	0.469346	DAK	dihydroxyacetone kinase 2 homolog (S. cerevisiae)
206296_x_at	7.52e-10	1.13e-11	-46.1	17.4375	-0.3688	MAP4K1	mitogen-activated protein kinase kinase kinase kinase 1
210769_at	7.57e-10	1.14e-11	46.1	17.4284	1.02648	CNGB1	cyclic nucleotide gated channel beta 1
1562314_at	7.58e-10	1.14e-11	46.1	17.4266	0.722721
1554876_a_at	7.59e-10	1.15e-11	46.1	17.4237	0.568217	S100Z	S100 calcium binding protein Z
1559127_x_at	7.63e-10	1.15e-11	46	17.4158	0.513171	RRP12	ribosomal RNA processing 12 homolog (S. cerevisiae)
208458_at	7.63e-10	1.16e-11	46	17.414	0.358777	SCNN1D	sodium channel, non-voltage-gated 1, delta subunit
207665_at	7.63e-10	1.16e-11	46	17.4132	0.373897	ADAM21P1///ADAM21	ADAM metallopeptidase domain 21 pseudogene 1///ADAM metallopeptidase domain 21
233435_at	7.64e-10	1.16e-11	-46	17.4107	-0.450932
1563074_at	7.65e-10	1.16e-11	-46	17.4088	-0.361326	LOC255654	uncharacterized LOC255654
1567686_at	7.67e-10	1.17e-11	46	17.4041	0.34808	CECR9	cat eye syndrome chromosome region, candidate 9 (non-protein coding)
1561353_at	7.71e-10	1.17e-11	-45.9	17.3979	-0.459492
1559061_at	7.73e-10	1.18e-11	-45.9	17.3929	-0.339243	CACNA1G-AS1	CACNA1G antisense RNA 1
1562380_at	7.77e-10	1.18e-11	-45.9	17.3868	-0.502741
1564985_a_at	7.8e-10	1.19e-11	-45.9	17.381	-0.491637	SLC8A1	solute carrier family 8 (sodium/calcium exchanger), member 1
1562910_at	7.81e-10	1.19e-11	-45.8	17.3788	-0.355409	SH3PXD2B	SH3 and PX domains 2B
220117_at	7.84e-10	1.2e-11	45.8	17.3732	0.433404	ZNF385D	zinc finger protein 385D
228814_at	7.84e-10	1.2e-11	45.8	17.3722	1.07242	RBBP6	retinoblastoma binding protein 6
239692_at	7.85e-10	1.2e-11	-45.8	17.3694	-0.485365
224203_at	7.86e-10	1.21e-11	-45.8	17.3669	-0.441632	SUFU	suppressor of fused homolog (Drosophila)
217274_x_at	7.87e-10	1.21e-11	-45.8	17.3626	-0.455925	MYL4	myosin, light chain 4, alkali; atrial, embryonic
228279_s_at	7.87e-10	1.21e-11	-45.8	17.3622	-0.41609
244207_at	7.89e-10	1.22e-11	45.7	17.3581	0.412082
211252_x_at	7.91e-10	1.22e-11	45.7	17.3547	0.327912	PTCRA	pre T-cell antigen receptor alpha
233370_at	8.03e-10	1.24e-11	-45.6	17.337	-0.519525
235257_at	8.09e-10	1.25e-11	-45.6	17.3283	-0.434218	ODF3B	outer dense fiber of sperm tails 3B
228689_at	8.26e-10	1.28e-11	-45.5	17.3037	-2.50383	NDUFA11	NADH dehydrogenase (ubiquinone) 1 alpha subcomplex, 11, 14.7kDa
205813_s_at	8.26e-10	1.28e-11	45.5	17.3023	0.4331	MAT1A	methionine adenosyltransferase I, alpha
232620_at	8.34e-10	1.3e-11	45.4	17.2909	0.36413	WDR93	WD repeat domain 93
217493_x_at	8.43e-10	1.31e-11	45.4	17.278	1.27742	NCR2	natural cytotoxicity triggering receptor 2
1560942_at	8.44e-10	1.32e-11	45.3	17.2732	0.334201	PGD	phosphogluconate dehydrogenase
240900_at	8.44e-10	1.32e-11	45.3	17.2731	0.351182	C7orf50	chromosome 7 open reading frame 50
210641_at	8.44e-10	1.32e-11	-45.3	17.273	-0.437386	CAPN9	calpain 9
1567298_at	8.46e-10	1.32e-11	-45.3	17.269	-1.73154	OR13C4	olfactory receptor, family 13, subfamily C, member 4
244686_at	8.46e-10	1.32e-11	-45.3	17.2679	-0.509685	TCOF1	Treacher Collins-Franceschetti syndrome 1
232027_at	8.48e-10	1.33e-11	-45.3	17.2623	-0.378972	SYNE1	spectrin repeat containing, nuclear envelope 1
223683_at	8.48e-10	1.33e-11	-45.3	17.2621	-0.365228	ZMYND15	zinc finger, MYND-type containing 15
1554057_at	8.48e-10	1.33e-11	-45.3	17.2621	-0.907434	ASH1L-AS1	ASH1L antisense RNA 1
1557027_at	8.51e-10	1.34e-11	45.2	17.256	0.438191	LOC100287221	uncharacterized LOC100287221
216473_x_at	8.51e-10	1.34e-11	45.2	17.2552	0.911989	DUX4L2///DUX4L3///DUX4L5///DUX4L6///DUX4L7///DUX4L4///DUX4	double homeobox 4 like 2///double homeobox 4 like 3///double homeobox 4 like 5///double homeobox 4 like 6///double homeobox 4 like 7///double homeobox 4 like 4///double homeobox 4
1563398_at	8.51e-10	1.34e-11	45.2	17.2538	0.637139
232787_at	8.51e-10	1.34e-11	45.2	17.2529	0.354844	HELZ2	helicase with zinc finger 2, transcriptional coactivator
237308_at	8.53e-10	1.35e-11	45.2	17.2487	0.511909
1561497_at	8.64e-10	1.37e-11	45.1	17.2336	0.339275
234620_at	8.76e-10	1.39e-11	45.1	17.2176	1.17761	TPM3P9///TPM3	tropomyosin 3 pseudogene 9///tropomyosin 3
210457_x_at	8.8e-10	1.39e-11	45	17.2112	1.06509	HMGA1	high mobility group AT-hook 1
215829_at	8.8e-10	1.4e-11	45	17.2103	0.420153	SHANK2	SH3 and multiple ankyrin repeat domains 2
1562056_at	8.83e-10	1.4e-11	45	17.2059	0.394654
231415_at	8.83e-10	1.4e-11	-45	17.2038	-0.384833	WBSCR22	Williams Beuren syndrome chromosome region 22
1553559_at	8.93e-10	1.42e-11	44.9	17.1905	0.340947	TMEM171	transmembrane protein 171
205265_s_at	9.02e-10	1.44e-11	-44.9	17.1784	-0.571832	SPEG	SPEG complex locus
239844_x_at	9.03e-10	1.44e-11	44.9	17.1768	0.330459	C1orf228	chromosome 1 open reading frame 228
236021_at	9.08e-10	1.45e-11	44.8	17.1694	0.351866
241795_at	9.08e-10	1.45e-11	44.8	17.1679	0.409694	RHEB	Ras homolog enriched in brain
232581_x_at	9.2e-10	1.47e-11	-44.7	17.1523	-0.34668	HIVEP3	human immunodeficiency virus type I enhancer binding protein 3
1554086_at	9.2e-10	1.47e-11	-44.7	17.1516	-0.34258	TUBGCP3	tubulin, gamma complex associated protein 3
237077_at	9.25e-10	1.48e-11	-44.7	17.1449	-0.610307
1560817_at	9.26e-10	1.49e-11	-44.7	17.1414	-0.330622	LOC100287627	similar to hCG1997308
2028_s_at	9.28e-10	1.49e-11	-44.7	17.1383	-0.342419	E2F1	E2F transcription factor 1
1563595_at	9.31e-10	1.5e-11	44.7	17.1331	0.451717	SRGAP3	SLIT-ROBO Rho GTPase activating protein 3
1558407_at	9.31e-10	1.5e-11	-44.6	17.1323	-1.50139	PLEKHG2	pleckstrin homology domain containing, family G (with RhoGef domain) member 2
215979_s_at	9.33e-10	1.51e-11	44.6	17.1289	0.498804	SLC7A1	solute carrier family 7 (cationic amino acid transporter, y+ system), member 1
241437_s_at	9.45e-10	1.53e-11	44.6	17.1136	0.379823	EP400NL	EP400 N-terminal like
220080_at	9.45e-10	1.53e-11	44.6	17.1125	1.40114	FBXL8	F-box and leucine-rich repeat protein 8
243568_at	9.52e-10	1.54e-11	44.5	17.1033	0.397382
241084_x_at	9.52e-10	1.54e-11	44.5	17.1026	0.345126	DYNC1H1	dynein, cytoplasmic 1, heavy chain 1
237847_at	9.56e-10	1.55e-11	-44.5	17.0963	-0.458723	NTN1	netrin 1
1556378_a_at	9.56e-10	1.55e-11	-44.5	17.0955	-0.639737	LOC440896	uncharacterized LOC440896
1566527_at	9.61e-10	1.56e-11	44.4	17.0885	0.69088
243990_at	9.77e-10	1.59e-11	-44.3	17.0693	-0.42844
221629_x_at	9.87e-10	1.61e-11	44.3	17.0569	0.316981	FAM203A	family with sequence similarity 203, member A
217335_at	9.87e-10	1.61e-11	44.3	17.0559	0.372335	FLJ11292	uncharacterized protein FLJ11292
215517_at	9.93e-10	1.62e-11	-44.2	17.0487	-0.757569	PYGO1	pygopus homolog 1 (Drosophila)
233674_at	9.97e-10	1.63e-11	44.2	17.0426	0.307119
215744_at	9.99e-10	1.64e-11	-44.2	17.0391	-0.655866	FUS	fused in sarcoma
206611_at	1e-09	1.64e-11	-44.2	17.0347	-0.470921	C2orf27A	chromosome 2 open reading frame 27A
215437_x_at	1e-09	1.65e-11	44.2	17.0322	0.419476	BAZ2A	bromodomain adjacent to zinc finger domain, 2A
1558066_s_at	1e-09	1.65e-11	44.2	17.0304	0.36006	TBC1D16	TBC1 domain family, member 16
229424_s_at	1.01e-09	1.65e-11	-44.1	17.0264	-1.48028	LOC100288194	hypothetical protein LOC100288194
239322_at	1.01e-09	1.66e-11	44.1	17.0259	0.326057
211822_s_at	1.02e-09	1.67e-11	-44.1	17.0136	-0.396274	NLRP1	NLR family, pyrin domain containing 1
216538_at	1.02e-09	1.68e-11	44.1	17.0109	0.487165
234557_at	1.02e-09	1.69e-11	44	17.005	0.355848
206355_at	1.02e-09	1.69e-11	-44	17.0026	-0.457257	GNAL	guanine nucleotide binding protein (G protein), alpha activating activity polypeptide, olfactory type
223778_at	1.02e-09	1.7e-11	-44	17.0004	-0.478126	KIF9	kinesin family member 9
215005_at	1.03e-09	1.7e-11	-44	16.9969	-0.443668	NECAB2	N-terminal EF-hand calcium binding protein 2
244477_at	1.03e-09	1.7e-11	44	16.9964	0.410259	SLC12A3	solute carrier family 12 (sodium/chloride transporters), member 3
219058_x_at	1.03e-09	1.72e-11	-44	16.9866	-1.39942	TINAGL1	tubulointerstitial nephritis antigen-like 1
225555_x_at	1.03e-09	1.72e-11	-43.9	16.9851	-0.34554	AURKAIP1	aurora kinase A interacting protein 1
220783_at	1.04e-09	1.74e-11	-43.9	16.9737	-0.34252	MMP27	matrix metallopeptidase 27
234912_at	1.04e-09	1.74e-11	43.9	16.9718	0.366549	DKFZP547L112	uncharacterized protein DKFZp547L112
1553460_at	1.04e-09	1.74e-11	-43.9	16.9706	-0.385158	C2orf61	chromosome 2 open reading frame 61
231176_at	1.04e-09	1.74e-11	-43.9	16.97	-0.541149	PRR19	proline rich 19
242882_at	1.05e-09	1.75e-11	43.9	16.9644	0.343842	RNF207	ring finger protein 207
238120_at	1.05e-09	1.76e-11	43.8	16.961	0.4578	RPH3AL	rabphilin 3A-like (without C2 domains)
223740_at	1.06e-09	1.78e-11	-43.8	16.9491	-1.50003	AGPAT4-IT1	AGPAT4 intronic transcript 1 (non-protein coding)
237952_at	1.07e-09	1.8e-11	-43.7	16.9352	-0.398218
241389_at	1.09e-09	1.82e-11	43.6	16.9214	0.581185	CHRNB2	cholinergic receptor, nicotinic, beta 2 (neuronal)
239414_at	1.09e-09	1.83e-11	43.6	16.9196	0.57069
1561112_at	1.09e-09	1.83e-11	-43.6	16.9173	-0.351951
210954_s_at	1.09e-09	1.83e-11	-43.6	16.9158	-0.330414	TSC22D2	TSC22 domain family, member 2
215841_at	1.1e-09	1.86e-11	43.6	16.9025	0.429014	GUCA1B	guanylate cyclase activator 1B (retina)
1557991_at	1.11e-09	1.87e-11	43.5	16.8929	0.395657	METTL6	methyltransferase like 6
1566726_at	1.11e-09	1.87e-11	43.5	16.8925	0.461043
227114_at	1.12e-09	1.9e-11	43.4	16.8785	0.916866	RNF214	ring finger protein 214
232324_x_at	1.12e-09	1.9e-11	43.4	16.8776	0.97076
231286_at	1.12e-09	1.9e-11	43.4	16.8764	0.443493	C9orf47	chromosome 9 open reading frame 47
1564208_x_at	1.13e-09	1.91e-11	43.4	16.8695	1.29256	LINC00957	long intergenic non-protein coding RNA 957
217462_at	1.13e-09	1.92e-11	43.4	16.8675	0.638603	MYRF	myelin regulatory factor
211486_s_at	1.13e-09	1.92e-11	-43.4	16.8644	-0.334527	KCNQ2	potassium voltage-gated channel, KQT-like subfamily, member 2
236596_at	1.14e-09	1.93e-11	-43.4	16.858	-0.558719
232244_at	1.15e-09	1.96e-11	43.3	16.8444	0.882929	KIAA1161	KIAA1161
223999_at	1.15e-09	1.97e-11	43.3	16.8396	0.442433	PPIL2	peptidylprolyl isomerase (cyclophilin)-like 2
216496_s_at	1.15e-09	1.97e-11	-43.3	16.8371	-0.449178
1561104_at	1.16e-09	1.98e-11	43.2	16.8343	0.34782
217339_x_at	1.16e-09	1.98e-11	-43.2	16.8314	-0.401173	CTAG1A///CTAG1B	cancer/testis antigen 1A///cancer/testis antigen 1B
206187_at	1.16e-09	1.99e-11	43.2	16.8289	0.809951	PTGIR	prostaglandin I2 (prostacyclin) receptor (IP)
231241_at	1.16e-09	1.99e-11	-43.2	16.8288	-0.366125	TAF5LP1	TAF5-like RNA polymerase II, p300/CBP-associated factor (PCAF)-associated factor, 65kDa pseudogene 1
221075_s_at	1.16e-09	1.99e-11	43.2	16.8287	0.335029	NCR2	natural cytotoxicity triggering receptor 2
205411_at	1.16e-09	1.99e-11	43.2	16.8283	0.450223	STK4	serine/threonine kinase 4
1562220_at	1.16e-09	1.99e-11	43.2	16.825	0.438624
239908_at	1.16e-09	2e-11	-43.2	16.8234	-0.557697
231095_at	1.18e-09	2.03e-11	-43.1	16.8074	-0.352234	LOC100507049	uncharacterized LOC100507049
231325_at	1.19e-09	2.06e-11	-43	16.7922	-0.598721	UNC5D	unc-5 homolog D (C. elegans)
216910_at	1.2e-09	2.07e-11	43	16.7836	0.422093	XPNPEP2	X-prolyl aminopeptidase (aminopeptidase P) 2, membrane-bound
214158_s_at	1.2e-09	2.08e-11	43	16.7807	0.57546	PRDM10	PR domain containing 10
241197_at	1.21e-09	2.1e-11	43	16.7714	0.392302
233367_at	1.21e-09	2.1e-11	42.9	16.7684	0.559342
216224_s_at	1.21e-09	2.1e-11	42.9	16.7681	0.305326	HDAC6	histone deacetylase 6
1554705_at	1.21e-09	2.11e-11	42.9	16.7643	0.368881	SCARA5	scavenger receptor class A, member 5 (putative)
235903_at	1.21e-09	2.11e-11	42.9	16.7639	0.91174	ANKS6	ankyrin repeat and sterile alpha motif domain containing 6
223862_at	1.22e-09	2.13e-11	-42.9	16.7545	-0.958314	GHRL	ghrelin/obestatin prepropeptide
237655_at	1.22e-09	2.13e-11	42.9	16.7516	0.45341
243156_at	1.25e-09	2.17e-11	42.8	16.7315	0.435562
242487_at	1.25e-09	2.19e-11	42.7	16.725	0.372733	CC2D1B	coiled-coil and C2 domain containing 1B
1565776_at	1.25e-09	2.19e-11	42.7	16.7244	0.428434
214777_at	1.26e-09	2.2e-11	-42.7	16.7176	-0.482464	IGKV4-1	immunoglobulin kappa variable 4-1
238230_x_at	1.26e-09	2.2e-11	42.7	16.7163	0.322439	MAN2C1	mannosidase, alpha, class 2C, member 1
1555390_at	1.26e-09	2.21e-11	42.7	16.7132	0.685005	NOP9	NOP9 nucleolar protein
215617_at	1.27e-09	2.22e-11	-42.7	16.7075	-1.02363	SPATS2L	spermatogenesis associated, serine-rich 2-like
234182_at	1.27e-09	2.23e-11	42.7	16.7059	0.406362
1555155_at	1.27e-09	2.23e-11	42.6	16.7025	0.461318	MLLT6	myeloid/lymphoid or mixed-lineage leukemia (trithorax homolog, Drosophila); translocated to, 6
244378_at	1.27e-09	2.23e-11	42.6	16.7015	0.395325	HECTD4	HECT domain containing E3 ubiquitin protein ligase 4
240441_at	1.28e-09	2.25e-11	-42.6	16.6938	-0.607064	FAM99B	family with sequence similarity 99, member B (non-protein coding)
1555429_at	1.28e-09	2.26e-11	42.6	16.691	0.343558
1557421_at	1.28e-09	2.26e-11	42.6	16.6896	0.371784
236055_at	1.29e-09	2.28e-11	42.5	16.6797	0.419262	DQX1	DEAQ box RNA-dependent ATPase 1
232870_at	1.29e-09	2.29e-11	42.5	16.6731	1.25475	HDAC10	histone deacetylase 10
1555387_at	1.29e-09	2.3e-11	-42.5	16.6727	-0.32448	UBA1	ubiquitin-like modifier activating enzyme 1
207794_at	1.29e-09	2.3e-11	-42.5	16.6719	-0.307411	CCR2	chemokine (C-C motif) receptor 2
239658_at	1.31e-09	2.33e-11	-42.4	16.6587	-0.381792
234963_s_at	1.31e-09	2.33e-11	-42.4	16.6571	-0.427361	FA2H	fatty acid 2-hydroxylase
1566597_at	1.31e-09	2.33e-11	-42.4	16.6565	-0.390534
1568760_at	1.31e-09	2.34e-11	42.4	16.6531	0.587593	MYH11	myosin, heavy chain 11, smooth muscle
204196_x_at	1.33e-09	2.38e-11	42.3	16.6353	0.889938	PKNOX1	PBX/knotted 1 homeobox 1
1556737_at	1.33e-09	2.38e-11	42.3	16.6345	0.428377	LINC00671	long intergenic non-protein coding RNA 671
224223_s_at	1.33e-09	2.38e-11	42.3	16.6335	0.574303	PDE11A	phosphodiesterase 11A
1555136_at	1.33e-09	2.39e-11	-42.3	16.6302	-0.538053	FGD6	FYVE, RhoGEF and PH domain containing 6
1569396_at	1.34e-09	2.39e-11	42.3	16.6285	0.490705	RAB40C	RAB40C, member RAS oncogene family
230196_x_at	1.37e-09	2.45e-11	42.2	16.6004	0.875249	ARHGAP23	Rho GTPase activating protein 23
234448_at	1.39e-09	2.49e-11	42.1	16.5847	0.588929
218484_at	1.4e-09	2.51e-11	-42.1	16.5767	-1.44289	NDUFA4L2	NADH dehydrogenase (ubiquinone) 1 alpha subcomplex, 4-like 2
233541_at	1.41e-09	2.53e-11	-42	16.5664	-0.360876	LIMD1-AS1	LIMD1 antisense RNA 1
208262_x_at	1.42e-09	2.55e-11	42	16.5571	0.434809	MEFV	Mediterranean fever
1569487_at	1.42e-09	2.56e-11	-42	16.554	-0.443942
210444_at	1.43e-09	2.58e-11	41.9	16.5464	0.36447	NPY6R	neuropeptide Y receptor Y6 (pseudogene)
216152_at	1.43e-09	2.59e-11	41.9	16.5428	0.328722
1559390_a_at	1.44e-09	2.59e-11	41.9	16.5403	0.469071	C1orf227	chromosome 1 open reading frame 227
243694_at	1.44e-09	2.61e-11	41.9	16.5353	0.442678
211050_x_at	1.45e-09	2.62e-11	-41.9	16.5294	-0.335937	LOC100288069///LOC100134822	general transcription factor IIi pseudogene///uncharacterized LOC100134822
216207_x_at	1.46e-09	2.65e-11	41.8	16.5152	2.3924	LOC652493///IGKV1D-8///IGKV1-5///IGKC	ig kappa chain V-I region HK102-like///immunoglobulin kappa variable 1D-8///immunoglobulin kappa variable 1-5///immunoglobulin kappa constant
224235_at	1.46e-09	2.66e-11	-41.8	16.5148	-0.58882
1558484_s_at	1.46e-09	2.66e-11	-41.8	16.5138	-0.311579	LRRC27	leucine rich repeat containing 27
231615_at	1.47e-09	2.66e-11	41.8	16.5113	0.469806
241672_at	1.47e-09	2.67e-11	-41.8	16.5086	-0.66939	SERTM1	serine-rich and transmembrane domain containing 1
243719_at	1.47e-09	2.69e-11	41.7	16.5021	0.576628	STK19	serine/threonine kinase 19
220296_at	1.47e-09	2.69e-11	41.7	16.501	0.697473	SAP30L-AS1	SAP30L antisense RNA 1 (head to head)
241240_at	1.48e-09	2.7e-11	41.7	16.4983	0.684728
241800_x_at	1.48e-09	2.7e-11	41.7	16.4969	0.340047	ZMYM2	zinc finger, MYM-type 2
1553728_at	1.48e-09	2.72e-11	-41.7	16.4902	-0.511096	LRRC43	leucine rich repeat containing 43
1558275_at	1.48e-09	2.72e-11	-41.7	16.4893	-0.837297
232822_x_at	1.48e-09	2.72e-11	41.7	16.4892	0.30327	LINC00629	long intergenic non-protein coding RNA 629
242435_at	1.5e-09	2.76e-11	41.6	16.4741	0.371823	PDE4A	phosphodiesterase 4A, cAMP-specific
1561423_at	1.51e-09	2.79e-11	-41.6	16.4629	-0.525448	LINC00535	long intergenic non-protein coding RNA 535
1570015_at	1.51e-09	2.79e-11	41.6	16.4623	0.462957	CHIAP2	chitinase, acidic pseudogene 2
244229_at	1.51e-09	2.79e-11	-41.6	16.4621	-0.367732	PARVG	parvin, gamma
224276_at	1.51e-09	2.79e-11	-41.6	16.4618	-0.635736	ZNF33A	zinc finger protein 33A
241424_at	1.51e-09	2.79e-11	41.5	16.4603	0.517389
242960_at	1.53e-09	2.82e-11	-41.5	16.4486	-0.629261
235485_at	1.54e-09	2.84e-11	41.5	16.443	0.302186	WDR44	WD repeat domain 44
241852_at	1.54e-09	2.85e-11	41.5	16.44	0.314104
226716_at	1.54e-09	2.85e-11	41.5	16.4391	0.588837	PRR12	proline rich 12
213202_at	1.55e-09	2.87e-11	-41.4	16.4298	-1.75071	SETD1A	SET domain containing 1A
221052_at	1.55e-09	2.87e-11	41.4	16.4289	0.325049	TDRKH	tudor and KH domain containing
235655_at	1.55e-09	2.87e-11	-41.4	16.4289	-1.05969
241166_at	1.56e-09	2.89e-11	41.4	16.4225	0.335284
237628_at	1.56e-09	2.9e-11	41.4	16.4211	0.620809
234603_at	1.56e-09	2.91e-11	-41.4	16.4171	-0.363804
220465_at	1.56e-09	2.91e-11	41.3	16.4152	0.547537	CEBPA-AS1	CEBPA antisense RNA 1 (head to head)
239586_at	1.56e-09	2.92e-11	-41.3	16.413	-0.416358	FAM83A	family with sequence similarity 83, member A
241541_at	1.58e-09	2.95e-11	41.3	16.4009	0.38357	MIB2	mindbomb E3 ubiquitin protein ligase 2
211592_s_at	1.58e-09	2.96e-11	-41.3	16.3982	-1.69719	CACNA1C	calcium channel, voltage-dependent, L type, alpha 1C subunit
1565775_at	1.58e-09	2.96e-11	-41.3	16.3979	-0.365167	PIEZO2	piezo-type mechanosensitive ion channel component 2
1565845_at	1.58e-09	2.96e-11	41.3	16.3964	0.374076
1564407_a_at	1.58e-09	2.97e-11	-41.3	16.3941	-0.350898
1570182_at	1.6e-09	3e-11	-41.2	16.3834	-0.379277
239242_at	1.6e-09	3.01e-11	-41.2	16.3783	-0.656493	SLC25A5-AS1	SLC25A5 antisense RNA 1
229583_at	1.6e-09	3.02e-11	41.2	16.3763	0.343303
244737_at	1.63e-09	3.07e-11	-41.1	16.3567	-0.346721
208307_at	1.64e-09	3.08e-11	-41.1	16.3538	-0.471384	RBMY1J///RBMY1E///RBMY1D///RBMY1B///RBMY1F///RBMY1A1	RNA binding motif protein, Y-linked, family 1, member J///RNA binding motif protein, Y-linked, family 1, member E///RNA binding motif protein, Y-linked, family 1, member D///RNA binding motif protein, Y-linked, family 1, member B///RNA binding motif protein, Y-linked, family 1, member F///RNA binding motif protein, Y-linked, family 1, member A1
244489_at	1.64e-09	3.09e-11	41.1	16.3515	0.455818	LOC100129268	uncharacterized LOC100129268
1560896_a_at	1.65e-09	3.11e-11	-41	16.3434	-0.39564
241849_at	1.66e-09	3.15e-11	-41	16.3312	-0.333602
229041_s_at	1.68e-09	3.17e-11	-40.9	16.3222	-0.474294	ITGB2-AS1	ITGB2 antisense RNA 1
1553425_at	1.68e-09	3.18e-11	-40.9	16.3208	-0.582307	WDR65	WD repeat domain 65
222823_at	1.69e-09	3.2e-11	40.9	16.3141	0.285456	IPPK	inositol 1,3,4,5,6-pentakisphosphate 2-kinase
215640_at	1.69e-09	3.2e-11	40.9	16.3134	0.534927	TBC1D2B	TBC1 domain family, member 2B
226064_s_at	1.69e-09	3.2e-11	-40.9	16.3122	-0.349903	DGAT2	diacylglycerol O-acyltransferase 2
231440_at	1.7e-09	3.24e-11	-40.8	16.3004	-0.320002
226491_x_at	1.71e-09	3.25e-11	-40.8	16.2954	-0.387857	PTBP1	polypyrimidine tract binding protein 1
243263_at	1.72e-09	3.27e-11	40.8	16.2894	1.36035	LINC00482	long intergenic non-protein coding RNA 482
204909_at	1.74e-09	3.31e-11	40.7	16.2765	0.554333	DDX6	DEAD (Asp-Glu-Ala-Asp) box helicase 6
230095_at	1.74e-09	3.32e-11	-40.7	16.2714	-0.445425
216429_at	1.75e-09	3.34e-11	-40.7	16.2652	-0.391963
234477_at	1.75e-09	3.35e-11	40.7	16.2632	0.45259	IGHV4-31///IGHA1	immunoglobulin heavy variable 4-31///immunoglobulin heavy constant alpha 1
239139_at	1.77e-09	3.39e-11	40.6	16.2508	0.425149	CPNE9	copine family member IX
242246_x_at	1.77e-09	3.39e-11	40.6	16.2489	0.348661	MIR770	microRNA 770
1553755_at	1.78e-09	3.41e-11	40.6	16.2441	1.18243	NXNL1	nucleoredoxin-like 1
209851_at	1.78e-09	3.42e-11	40.6	16.2389	0.738864	ZC3H13	zinc finger CCCH-type containing 13
210497_x_at	1.78e-09	3.43e-11	-40.6	16.2381	-0.323277	SSX2B///SSX2	synovial sarcoma, X breakpoint 2B///synovial sarcoma, X breakpoint 2
209697_at	1.79e-09	3.44e-11	-40.6	16.2352	-0.315095	PPP3CC	protein phosphatase 3, catalytic subunit, gamma isozyme
207979_s_at	1.8e-09	3.46e-11	-40.5	16.2268	-0.436893	CD8B	CD8b molecule
206181_at	1.81e-09	3.48e-11	-40.5	16.2201	-0.292542	SLAMF1	signaling lymphocytic activation molecule family member 1
232684_at	1.82e-09	3.52e-11	40.5	16.2101	2.19312	ZNF503-AS1	ZNF503 antisense RNA 1
1561785_at	1.83e-09	3.53e-11	-40.4	16.2072	-0.569652	MUC4	mucin 4, cell surface associated
226205_at	1.83e-09	3.54e-11	-40.4	16.2029	-0.384934	ANKRD13D	ankyrin repeat domain 13 family, member D
206362_x_at	1.87e-09	3.61e-11	-40.3	16.1818	-0.733835	MAP3K10	mitogen-activated protein kinase kinase kinase 10
231682_at	1.87e-09	3.62e-11	-40.3	16.1797	-0.378966
221026_s_at	1.87e-09	3.63e-11	40.3	16.1757	0.37707	SCRT1	scratch homolog 1, zinc finger protein (Drosophila)
231636_s_at	1.88e-09	3.64e-11	40.3	16.173	0.525581
228527_s_at	1.89e-09	3.66e-11	40.3	16.1664	0.380557	SLC25A37	solute carrier family 25 (mitochondrial iron transporter), member 37
206124_s_at	1.89e-09	3.68e-11	40.2	16.161	0.607039	LLGL1	lethal giant larvae homolog 1 (Drosophila)
1567410_at	1.91e-09	3.72e-11	40.2	16.1491	0.295741	ZNF135	zinc finger protein 135
232016_at	1.91e-09	3.72e-11	-40.2	16.1484	-0.398913	FAN1	FANCD2/FANCI-associated nuclease 1
221894_at	1.94e-09	3.78e-11	40.1	16.1311	1.22654	ADCK2	aarF domain containing kinase 2
230978_at	1.94e-09	3.79e-11	40.1	16.1287	0.652664
1553263_at	1.95e-09	3.81e-11	-40.1	16.1238	-0.321061	USH1G	Usher syndrome 1G (autosomal recessive)
1553288_a_at	1.95e-09	3.81e-11	-40.1	16.1226	-0.58063	NYAP1	neuronal tyrosine-phosphorylated phosphoinositide-3-kinase adaptor 1
207458_at	1.95e-09	3.82e-11	40.1	16.1204	0.358853	RHPN1-AS1	RHPN1 antisense RNA 1 (head to head)
220061_at	1.95e-09	3.82e-11	-40.1	16.1198	-0.319475	ACSM5	acyl-CoA synthetase medium-chain family member 5
211011_at	1.95e-09	3.83e-11	40.1	16.117	0.379721	COL19A1	collagen, type XIX, alpha 1
219746_at	1.95e-09	3.84e-11	40	16.116	0.331483	DPF3	D4, zinc and double PHD fingers, family 3
221159_at	1.95e-09	3.84e-11	-40	16.1159	-0.623383
219845_at	1.97e-09	3.88e-11	40	16.1038	0.404104	BARX1	BARX homeobox 1
203839_s_at	1.98e-09	3.88e-11	-40	16.1021	-0.938112	TNK2	tyrosine kinase, non-receptor, 2
222083_at	2e-09	3.93e-11	39.9	16.0903	0.366375	GLYAT	glycine-N-acyltransferase
217212_s_at	2e-09	3.93e-11	39.9	16.0888	0.782309	IL9R	interleukin 9 receptor
231244_at	2.01e-09	3.97e-11	39.9	16.0785	0.386799
241522_at	2.01e-09	3.98e-11	-39.9	16.0769	-0.400153
1560582_a_at	2.01e-09	3.98e-11	39.9	16.0768	0.417777
1552604_at	2.02e-09	4e-11	39.8	16.0693	0.380193	LINC00308	long intergenic non-protein coding RNA 308
237782_at	2.04e-09	4.03e-11	-39.8	16.0616	-0.850729
1553451_at	2.04e-09	4.05e-11	-39.8	16.058	-0.442084	CCDC79	coiled-coil domain containing 79
236336_at	2.04e-09	4.05e-11	-39.8	16.0573	-0.83856
227496_at	2.05e-09	4.07e-11	-39.8	16.0522	-0.33694	LOC253842///NR6A1	uncharacterized LOC253842///nuclear receptor subfamily 6, group A, member 1
211461_at	2.06e-09	4.09e-11	39.8	16.0467	0.326067	CSPG4P1Y///CSPG4P2Y	chondroitin sulfate proteoglycan 4 pseudogene 1, Y-linked///chondroitin sulfate proteoglycan 4 pseudogene 2, Y-linked
230806_s_at	2.07e-09	4.11e-11	39.7	16.0418	0.376266	FAM65A	family with sequence similarity 65, member A
215959_at	2.07e-09	4.12e-11	-39.7	16.0383	-0.296542	PPFIBP2	PTPRF interacting protein, binding protein 2 (liprin beta 2)
230451_at	2.07e-09	4.12e-11	39.7	16.0377	0.419633	LOC100506974	uncharacterized LOC100506974
230539_at	2.07e-09	4.13e-11	39.7	16.0349	0.376078	FAM182A	family with sequence similarity 182, member A
239157_at	2.07e-09	4.14e-11	-39.7	16.0334	-0.28495	ZSCAN12P1	zinc finger and SCAN domain containing 12 pseudogene 1
237880_at	2.09e-09	4.18e-11	39.6	16.022	0.315943
215138_s_at	2.11e-09	4.21e-11	-39.6	16.0145	-2.33638	KAZN	kazrin, periplakin interacting protein
215712_s_at	2.11e-09	4.22e-11	-39.6	16.012	-0.440211	IGFALS	insulin-like growth factor binding protein, acid labile subunit
220300_at	2.11e-09	4.22e-11	-39.6	16.0115	-0.388062	RGS3	regulator of G-protein signaling 3
214821_at	2.11e-09	4.23e-11	-39.6	16.0085	-0.387897	SLC25A4	solute carrier family 25 (mitochondrial carrier; adenine nucleotide translocator), member 4
233960_s_at	2.11e-09	4.24e-11	-39.6	16.0068	-0.420083	LOC115110	uncharacterized LOC115110
234443_at	2.12e-09	4.27e-11	-39.6	16.0004	-0.456429
1555922_at	2.12e-09	4.27e-11	39.6	16	0.297885	C10orf114	chromosome 10 open reading frame 114
234627_at	2.12e-09	4.27e-11	39.6	15.9993	0.540467	FLJ21408	uncharacterized LOC400512
231352_at	2.14e-09	4.32e-11	-39.5	15.9874	-0.357571	SLC22A8	solute carrier family 22 (organic anion transporter), member 8
221453_at	2.16e-09	4.35e-11	39.5	15.9803	0.297318	G6PC2	glucose-6-phosphatase, catalytic, 2
1563369_at	2.17e-09	4.38e-11	-39.4	15.9718	-0.308961	LINC00173	long intergenic non-protein coding RNA 173
228319_at	2.17e-09	4.39e-11	-39.4	15.9695	-0.291087	FAM84A	family with sequence similarity 84, member A
231942_at	2.19e-09	4.43e-11	-39.4	15.9605	-0.316728
1554183_s_at	2.2e-09	4.44e-11	39.4	15.9559	0.29125	TRIM74///TRIM73	tripartite motif containing 74///tripartite motif containing 73
220021_at	2.2e-09	4.45e-11	-39.4	15.9547	-0.410853	TMC7	transmembrane channel-like 7
233170_at	2.2e-09	4.46e-11	39.4	15.9517	0.570033
1557827_at	2.2e-09	4.46e-11	39.3	15.9512	0.360559	DNAJC9-AS1	DNAJC9 antisense RNA 1
214523_at	2.21e-09	4.48e-11	-39.3	15.9477	-0.387529	CEBPE	CCAAT/enhancer binding protein (C/EBP), epsilon
240086_at	2.21e-09	4.5e-11	-39.3	15.9422	-0.497651	VPS36	vacuolar protein sorting 36 homolog (S. cerevisiae)
217051_s_at	2.22e-09	4.52e-11	39.3	15.9365	0.25404
240209_at	2.22e-09	4.53e-11	-39.3	15.9355	-0.378338	C16orf78	chromosome 16 open reading frame 78
215368_at	2.23e-09	4.53e-11	-39.3	15.9343	-0.510939	NEB	nebulin
211056_s_at	2.24e-09	4.56e-11	-39.3	15.9281	-2.08531	SRD5A1	steroid-5-alpha-reductase, alpha polypeptide 1 (3-oxo-5 alpha-steroid delta 4-dehydrogenase alpha 1)
230385_at	2.24e-09	4.57e-11	39.2	15.9265	0.36295	2014-03-03	membrane-associated ring finger (C3HC4) 3, E3 ubiquitin protein ligase
216117_at	2.26e-09	4.62e-11	39.2	15.9136	0.355193	EXOSC2	exosome component 2
1561141_at	2.26e-09	4.62e-11	39.2	15.9128	0.332866
228028_at	2.26e-09	4.62e-11	39.2	15.9127	0.603201	GAREML	GRB2 associated, regulator of MAPK1-like
220011_at	2.26e-09	4.64e-11	39.2	15.9099	0.285979	AUNIP	aurora kinase A and ninein interacting protein
217046_s_at	2.26e-09	4.64e-11	-39.2	15.909	-0.419333	AGER	advanced glycosylation end product-specific receptor
209950_s_at	2.27e-09	4.65e-11	-39.2	15.906	-1.30404	VILL	villin-like
233978_at	2.27e-09	4.67e-11	39.1	15.9021	0.367832	PTPRE	protein tyrosine phosphatase, receptor type, E
211811_s_at	2.27e-09	4.68e-11	-39.1	15.8991	-0.322975	PCDHA6	protocadherin alpha 6
244479_at	2.27e-09	4.69e-11	39.1	15.898	0.383026
206207_at	2.27e-09	4.69e-11	39.1	15.8976	0.370298	CLC	Charcot-Leyden crystal galectin
218406_x_at	2.27e-09	4.69e-11	39.1	15.8976	0.346749	NENF	neudesin neurotrophic factor
238150_at	2.28e-09	4.7e-11	39.1	15.8949	0.280749
244421_at	2.28e-09	4.7e-11	-39.1	15.8945	-0.313241
1556504_at	2.28e-09	4.71e-11	-39.1	15.8916	-0.478709
1554059_at	2.28e-09	4.72e-11	-39.1	15.8904	-0.289126	SETMAR	SET domain and mariner transposase fusion gene
1562238_at	2.28e-09	4.73e-11	-39.1	15.8891	-0.462516	USPL1	ubiquitin specific peptidase like 1
1554091_a_at	2.29e-09	4.75e-11	-39.1	15.8843	-0.815958	TIRAP	toll-interleukin 1 receptor (TIR) domain containing adaptor protein
240771_at	2.29e-09	4.75e-11	-39.1	15.883	-0.691965	C1orf101	chromosome 1 open reading frame 101
240886_at	2.29e-09	4.76e-11	39.1	15.8819	0.669491	CASR	calcium-sensing receptor
243944_at	2.29e-09	4.77e-11	-39.1	15.88	-0.314515
220149_at	2.3e-09	4.79e-11	-39	15.8741	-0.712397	C2orf54	chromosome 2 open reading frame 54
239584_at	2.3e-09	4.79e-11	-39	15.8734	-0.309944
1557372_at	2.31e-09	4.8e-11	39	15.8715	0.368337	FLJ41757	uncharacterized LOC440862
239912_at	2.31e-09	4.82e-11	39	15.867	1.82013
1569999_at	2.31e-09	4.83e-11	39	15.8658	1.23329
232767_at	2.31e-09	4.84e-11	39	15.8643	0.361847	CADM1	cell adhesion molecule 1
213635_s_at	2.36e-09	4.93e-11	-38.9	15.8431	-0.353441	SAFB	scaffold attachment factor B
223678_s_at	2.38e-09	4.99e-11	38.8	15.8311	0.498575	SFTPA2///SFTPA1	surfactant protein A2///surfactant protein A1
221172_at	2.4e-09	5.04e-11	-38.8	15.8201	-0.46403	C7orf69	chromosome 7 open reading frame 69
231743_at	2.45e-09	5.15e-11	38.7	15.7961	0.313998	WNT3	wingless-type MMTV integration site family, member 3
216047_x_at	2.45e-09	5.15e-11	38.7	15.7957	0.319624	SEZ6L	seizure related 6 homolog (mouse)-like
242285_at	2.46e-09	5.16e-11	38.7	15.7934	0.510589
210313_at	2.46e-09	5.18e-11	38.7	15.7897	0.516047	LILRA4	leukocyte immunoglobulin-like receptor, subfamily A (with TM domain), member 4
239021_at	2.48e-09	5.22e-11	38.6	15.7819	0.617173	TLR6	toll-like receptor 6
230912_at	2.5e-09	5.26e-11	38.6	15.7731	0.669228	ASPDH	aspartate dehydrogenase domain containing
235726_at	2.5e-09	5.27e-11	-38.6	15.7707	-0.411107	ZBTB10	zinc finger and BTB domain containing 10
214122_at	2.51e-09	5.3e-11	38.6	15.7648	0.348615	PDLIM7	PDZ and LIM domain 7 (enigma)
206892_at	2.52e-09	5.31e-11	-38.6	15.7623	-0.314236	AMHR2	anti-Mullerian hormone receptor, type II
234119_at	2.52e-09	5.32e-11	38.6	15.7611	0.443766
234074_at	2.52e-09	5.32e-11	-38.6	15.7607	-0.338825
204938_s_at	2.53e-09	5.36e-11	-38.5	15.7523	-0.45041	PLN	phospholamban
224117_at	2.55e-09	5.4e-11	-38.5	15.7433	-0.534628	LOC284912	uncharacterized LOC284912
230007_at	2.55e-09	5.41e-11	-38.5	15.742	-0.272654	JMJD1C	jumonji domain containing 1C
220340_at	2.55e-09	5.41e-11	38.5	15.742	0.288469	GREB1L	growth regulation by estrogen in breast cancer-like
1562701_at	2.56e-09	5.43e-11	38.5	15.7375	0.291048
1565002_at	2.56e-09	5.45e-11	38.4	15.7337	0.32196
230338_x_at	2.56e-09	5.45e-11	38.4	15.7333	0.277289	GSX2	GS homeobox 2
224342_x_at	2.59e-09	5.51e-11	-38.4	15.7219	-0.28346	LOC96610	BMS1 homolog, ribosome assembly protein (yeast) pseudogene
1568799_at	2.6e-09	5.53e-11	38.4	15.7177	0.348966
232120_at	2.6e-09	5.55e-11	38.4	15.715	0.28766
1557908_at	2.6e-09	5.55e-11	38.4	15.7133	1.12587
1562914_a_at	2.6e-09	5.56e-11	-38.4	15.7125	-0.323612	LINC00905	long intergenic non-protein coding RNA 905
210593_at	2.61e-09	5.59e-11	38.3	15.7063	0.384023	ZSWIM8///SAT1	zinc finger, SWIM-type containing 8///spermidine/spermine N1-acetyltransferase 1
208254_at	2.62e-09	5.6e-11	38.3	15.7052	0.383044
242027_at	2.62e-09	5.61e-11	38.3	15.7018	0.431339
236023_at	2.62e-09	5.62e-11	38.3	15.7015	0.660388	CDK9	cyclin-dependent kinase 9
1558238_at	2.66e-09	5.7e-11	-38.3	15.6856	-0.555945	TNRC18	trinucleotide repeat containing 18
1552609_s_at	2.66e-09	5.7e-11	38.2	15.6848	0.421782	IFNL3///IFNL2	interferon, lambda 3///interferon, lambda 2
1567010_at	2.66e-09	5.72e-11	38.2	15.6812	0.277218
211053_at	2.67e-09	5.74e-11	-38.2	15.6773	-0.295038	KCNG1	potassium voltage-gated channel, subfamily G, member 1
241427_x_at	2.68e-09	5.78e-11	38.2	15.6701	0.344022
244722_at	2.69e-09	5.79e-11	-38.2	15.6678	-0.423625
210106_at	2.69e-09	5.79e-11	-38.2	15.6673	-0.43048	RDH5	retinol dehydrogenase 5 (11-cis/9-cis)
216849_at	2.7e-09	5.84e-11	-38.1	15.6597	-0.495675
241511_at	2.71e-09	5.86e-11	38.1	15.6547	0.367223
1552863_a_at	2.73e-09	5.9e-11	-38.1	15.6479	-0.501147	CACNG6	calcium channel, voltage-dependent, gamma subunit 6
1556984_at	2.73e-09	5.9e-11	-38.1	15.6473	-1.00881
242743_at	2.75e-09	5.95e-11	-38.1	15.6379	-0.286384	IL4R	interleukin 4 receptor
222374_at	2.8e-09	6.07e-11	38	15.6177	0.605875	BTRC	beta-transducin repeat containing E3 ubiquitin protein ligase
220683_at	2.82e-09	6.11e-11	37.9	15.6095	0.330301	RDH8	retinol dehydrogenase 8 (all-trans)
241501_at	2.82e-09	6.12e-11	37.9	15.6079	0.36379
1560448_at	2.82e-09	6.12e-11	-37.9	15.607	-0.320781	PRR7-AS1	PRR7 antisense RNA 1
1553297_a_at	2.82e-09	6.13e-11	-37.9	15.6056	-2.50815	CSF3R	colony stimulating factor 3 receptor (granulocyte)
234198_at	2.82e-09	6.14e-11	-37.9	15.6047	-0.292409	KCNIP3	Kv channel interacting protein 3, calsenilin
234919_s_at	2.83e-09	6.15e-11	37.9	15.6017	0.294293	SNTG1	syntrophin, gamma 1
1559210_at	2.84e-09	6.2e-11	37.9	15.5942	0.446542
220583_at	2.87e-09	6.27e-11	-37.8	15.5812	-0.2546
231245_s_at	2.89e-09	6.31e-11	-37.8	15.5753	-0.335726
214103_s_at	2.89e-09	6.31e-11	37.8	15.5752	0.298767	RAP2A	RAP2A, member of RAS oncogene family
234337_at	2.91e-09	6.37e-11	37.8	15.5645	0.409207	TTLL9	tubulin tyrosine ligase-like family, member 9
233941_at	2.91e-09	6.37e-11	37.8	15.564	0.278286	C14orf166B	chromosome 14 open reading frame 166B
1556301_at	2.91e-09	6.38e-11	-37.8	15.5621	-0.939129	LOC100287015	uncharacterized LOC100287015
216208_s_at	2.96e-09	6.5e-11	-37.7	15.5426	-0.40744	ATF6B	activating transcription factor 6 beta
221226_s_at	2.97e-09	6.53e-11	37.7	15.5373	0.289521	ASIC4	acid-sensing (proton-gated) ion channel family member 4
208356_x_at	2.97e-09	6.54e-11	37.6	15.5363	0.415922	CSH1	chorionic somatomammotropin hormone 1 (placental lactogen)
216692_at	2.97e-09	6.54e-11	37.6	15.5362	0.281861
237688_at	2.98e-09	6.57e-11	37.6	15.5312	0.681034
229561_at	2.99e-09	6.58e-11	37.6	15.5296	0.686684	LRRC16B	leucine rich repeat containing 16B
1564075_a_at	3e-09	6.61e-11	-37.6	15.5244	-0.342329	C17orf104	chromosome 17 open reading frame 104
232845_at	3e-09	6.61e-11	-37.6	15.5233	-0.317095	CDH23	cadherin-related 23
1554442_at	3.01e-09	6.65e-11	-37.6	15.5182	-0.301466	BEST1	bestrophin 1
244064_at	3.02e-09	6.67e-11	-37.6	15.5149	-0.613415
218279_s_at	3.02e-09	6.69e-11	37.5	15.5114	0.2848	HIST2H2AA3	histone cluster 2, H2aa3
1566697_at	3.07e-09	6.79e-11	37.5	15.4952	0.315377
243458_at	3.09e-09	6.85e-11	37.4	15.4853	0.598858
213829_x_at	3.1e-09	6.88e-11	-37.4	15.4801	-0.976624	RTEL1	regulator of telomere elongation helicase 1
225482_at	3.12e-09	6.92e-11	37.4	15.4743	0.28664	KIF1A	kinesin family member 1A
239662_x_at	3.12e-09	6.92e-11	-37.4	15.4737	-0.512686	TMCC1	transmembrane and coiled-coil domain family 1
209602_s_at	3.15e-09	7e-11	-37.3	15.4608	-0.330075	GATA3	GATA binding protein 3
220522_at	3.16e-09	7.02e-11	37.3	15.4583	0.357285	CRB1	crumbs homolog 1 (Drosophila)
202222_s_at	3.17e-09	7.06e-11	37.3	15.4529	0.771382	DES	desmin
207382_at	3.21e-09	7.16e-11	37.3	15.4373	0.366424	TP63	tumor protein p63
1556308_at	3.22e-09	7.18e-11	-37.2	15.4345	-1.9878	PRRT3	proline-rich transmembrane protein 3
215746_at	3.22e-09	7.19e-11	37.2	15.4325	0.392044
230547_at	3.22e-09	7.2e-11	37.2	15.4311	0.33525	KCNC1	potassium voltage-gated channel, Shaw-related subfamily, member 1
237023_at	3.23e-09	7.23e-11	-37.2	15.427	-0.342617
228798_x_at	3.24e-09	7.24e-11	-37.2	15.4246	-0.367995	MAZ	MYC-associated zinc finger protein (purine-binding transcription factor)
217205_at	3.25e-09	7.27e-11	-37.2	15.4208	-0.317512	LOC100420758	poly(A) binding protein, nuclear 1 pseudogene
240963_x_at	3.25e-09	7.27e-11	37.2	15.42	0.398679	PLXDC1	plexin domain containing 1
240184_at	3.25e-09	7.28e-11	37.2	15.4193	0.414631	SYNPR-AS1	SYNPR antisense RNA 1
233008_at	3.25e-09	7.29e-11	-37.2	15.4177	-0.289106	LOC100507284	uncharacterized LOC100507284
1564204_at	3.25e-09	7.3e-11	-37.2	15.4165	-0.461765	LINC00869	long intergenic non-protein coding RNA 869
240582_x_at	3.31e-09	7.43e-11	-37.1	15.3963	-0.347389
237826_at	3.31e-09	7.45e-11	37.1	15.3943	0.313153
234858_at	3.31e-09	7.45e-11	37.1	15.3941	0.443011
1561518_at	3.36e-09	7.56e-11	-37	15.3772	-0.286901	LOC283914	uncharacterized LOC283914
243406_at	3.36e-09	7.59e-11	37	15.374	0.396655
214070_s_at	3.36e-09	7.59e-11	37	15.374	0.279279	ATP10B	ATPase, class V, type 10B
207734_at	3.37e-09	7.62e-11	-37	15.3689	-0.747899	LAX1	lymphocyte transmembrane adaptor 1
231052_at	3.4e-09	7.68e-11	-36.9	15.3598	-0.341662	GLOD5	glyoxalase domain containing 5
240148_at	3.41e-09	7.72e-11	-36.9	15.3544	-0.303485	MSH6	mutS homolog 6 (E. coli)
235597_s_at	3.42e-09	7.75e-11	36.9	15.3504	0.40907	RGPD1	RANBP2-like and GRIP domain containing 1
230181_at	3.44e-09	7.78e-11	36.9	15.3457	0.412064	PQLC1	PQ loop repeat containing 1
220292_at	3.44e-09	7.8e-11	36.9	15.3432	0.371222	ZSCAN32	zinc finger and SCAN domain containing 32
230001_at	3.44e-09	7.8e-11	36.9	15.343	0.339838	2014-03-09	membrane-associated ring finger (C3HC4) 9
234712_at	3.45e-09	7.83e-11	36.9	15.3398	0.28411	LINC00470	long intergenic non-protein coding RNA 470
235497_at	3.45e-09	7.84e-11	-36.9	15.3373	-1.47833	LOC643837	uncharacterized LOC643837
223752_at	3.46e-09	7.87e-11	-36.8	15.3337	-0.421995	CFC1	cripto, FRL-1, cryptic family 1
238325_s_at	3.46e-09	7.88e-11	-36.8	15.3322	-0.348842	ODF3B	outer dense fiber of sperm tails 3B
220894_x_at	3.47e-09	7.91e-11	-36.8	15.3279	-0.298051	PRDM12	PR domain containing 12
220557_s_at	3.47e-09	7.92e-11	-36.8	15.3272	-0.655472	PACS1	phosphofurin acidic cluster sorting protein 1
240071_at	3.49e-09	7.97e-11	36.8	15.3206	0.372126
202618_s_at	3.49e-09	7.98e-11	36.8	15.3183	0.91573	MECP2	methyl CpG binding protein 2 (Rett syndrome)
217533_x_at	3.49e-09	7.99e-11	-36.8	15.3178	-0.298063
1559064_at	3.49e-09	8e-11	36.8	15.3163	1.13209	NUP153	nucleoporin 153kDa
210359_at	3.49e-09	8e-11	36.8	15.3159	0.382107	MTSS1	metastasis suppressor 1
1567856_x_at	3.52e-09	8.06e-11	36.7	15.3081	0.349852	ZNF29P	zinc finger protein 29, pseudogene
231374_at	3.54e-09	8.12e-11	36.7	15.2991	0.34142
209874_x_at	3.54e-09	8.14e-11	36.7	15.2975	0.281365	CNNM2	cyclin M2
222019_at	3.55e-09	8.16e-11	36.7	15.2941	0.521652	PFDN6	prefoldin subunit 6
1570176_at	3.57e-09	8.2e-11	36.7	15.2885	0.50525
1561318_at	3.57e-09	8.22e-11	36.7	15.2858	0.29553
243941_at	3.57e-09	8.23e-11	36.7	15.2854	0.3404
1564069_at	3.6e-09	8.3e-11	36.6	15.2761	0.301772	HOTTIP	HOXA distal transcript antisense RNA
206781_at	3.63e-09	8.37e-11	-36.6	15.2663	-0.402023	DNAJC4	DnaJ (Hsp40) homolog, subfamily C, member 4
240997_at	3.64e-09	8.4e-11	36.6	15.2629	0.364158
237899_at	3.65e-09	8.43e-11	36.6	15.2592	0.306038
232648_at	3.65e-09	8.44e-11	36.5	15.2571	0.515635	PSMA3	proteasome (prosome, macropain) subunit, alpha type, 3
1565690_at	3.65e-09	8.45e-11	36.5	15.2566	0.293356
1556267_at	3.65e-09	8.45e-11	36.5	15.2562	0.655528	MYRFL	myelin regulatory factor-like
240784_at	3.65e-09	8.45e-11	-36.5	15.256	-0.296887	NAT16	N-acetyltransferase 16 (GCN5-related, putative)
236973_at	3.65e-09	8.47e-11	-36.5	15.2533	-0.328124	LOC100131662	uncharacterized LOC100131662
227308_x_at	3.65e-09	8.48e-11	-36.5	15.2528	-0.342511	LTBP3	latent transforming growth factor beta binding protein 3
211819_s_at	3.65e-09	8.48e-11	-36.5	15.2527	-0.352983	SORBS1	sorbin and SH3 domain containing 1
234372_at	3.65e-09	8.48e-11	-36.5	15.2526	-0.395204
208230_s_at	3.65e-09	8.5e-11	-36.5	15.2499	-0.312398	NRG1	neuregulin 1
1569991_at	3.67e-09	8.55e-11	-36.5	15.243	-0.394581	KY	kyphoscoliosis peptidase
212963_at	3.71e-09	8.65e-11	36.4	15.2306	0.744155	TM2D1	TM2 domain containing 1
216848_at	3.72e-09	8.68e-11	36.4	15.2266	0.302508
238745_at	3.76e-09	8.77e-11	-36.4	15.216	-0.388392
1561965_at	3.76e-09	8.78e-11	36.4	15.2145	0.380653	SNRPB2	small nuclear ribonucleoprotein polypeptide B
214226_at	3.79e-09	8.85e-11	-36.3	15.2057	-0.375621	PRSS53	protease, serine, 53
243205_at	3.81e-09	8.91e-11	36.3	15.1986	0.290757
208401_s_at	3.81e-09	8.92e-11	36.3	15.1974	0.467159	GLP1R	glucagon-like peptide 1 receptor
216897_s_at	3.81e-09	8.93e-11	-36.3	15.1957	-0.254354	FAM76A	family with sequence similarity 76, member A
206086_x_at	3.81e-09	8.94e-11	36.3	15.1954	1.70874	HFE	hemochromatosis
1558586_at	3.82e-09	8.95e-11	-36.3	15.1932	-1.74981	ZNF33B	zinc finger protein 33B
220639_at	3.82e-09	8.97e-11	-36.3	15.1916	-0.381805	TM4SF20	transmembrane 4 L six family member 20
1565732_at	3.84e-09	9.02e-11	-36.3	15.1852	-0.526678
233493_at	3.86e-09	9.08e-11	-36.2	15.1776	-0.322594	OR2A4	olfactory receptor, family 2, subfamily A, member 4
222205_x_at	3.87e-09	9.1e-11	-36.2	15.175	-0.74663	FAM182B	family with sequence similarity 182, member B
223867_at	3.88e-09	9.14e-11	36.2	15.1705	0.281008	TEKT3	tektin 3
202768_at	3.92e-09	9.24e-11	36.2	15.159	0.480881	FOSB	FBJ murine osteosarcoma viral oncogene homolog B
231761_at	3.92e-09	9.25e-11	-36.2	15.1581	-0.285147	FFAR1	free fatty acid receptor 1
216302_at	3.96e-09	9.35e-11	36.1	15.1461	1.72442	LOC649330///HNRNPCP5///HNRNPCL1///HNRNPC	heterogeneous nuclear ribonucleoprotein C-like///heterogeneous nuclear ribonucleoprotein C pseudogene 5///heterogeneous nuclear ribonucleoprotein C-like 1///heterogeneous nuclear ribonucleoprotein C (C1/C2)
207504_at	3.97e-09	9.37e-11	-36.1	15.1433	-0.320547	CA7	carbonic anhydrase VII
1561944_at	3.97e-09	9.38e-11	36.1	15.1421	0.515322
1561619_at	3.97e-09	9.39e-11	-36.1	15.1415	-0.440177
207800_at	3.97e-09	9.42e-11	36.1	15.1378	0.506407	AKAP5	A kinase (PRKA) anchor protein 5
1553361_x_at	3.97e-09	9.42e-11	36.1	15.1377	0.309419	FBXL18	F-box and leucine-rich repeat protein 18
1570423_at	3.97e-09	9.42e-11	36.1	15.1376	0.385341
208496_x_at	3.97e-09	9.43e-11	36.1	15.1362	0.814392	HIST1H3G	histone cluster 1, H3g
219907_at	3.97e-09	9.44e-11	-36.1	15.1358	-0.351325	FRS3	fibroblast growth factor receptor substrate 3
241650_x_at	3.99e-09	9.48e-11	36.1	15.1312	0.257747	HMCN2	hemicentin 2
210234_at	3.99e-09	9.5e-11	36	15.1285	0.287162	GRM4	glutamate receptor, metabotropic 4
229915_at	4e-09	9.53e-11	-36	15.1253	-0.335918	FAM26F	family with sequence similarity 26, member F
1560250_s_at	4.01e-09	9.56e-11	36	15.1219	0.3571	LOC284242	uncharacterized LOC284242
208406_s_at	4.03e-09	9.61e-11	36	15.116	0.383948	GRAP2	GRB2-related adaptor protein 2
229260_at	4.1e-09	9.78e-11	35.9	15.0972	0.283319	C5orf15	chromosome 5 open reading frame 15
237643_at	4.1e-09	9.8e-11	-35.9	15.0944	-0.245919
215650_at	4.1e-09	9.81e-11	35.9	15.0938	0.413483
1553178_a_at	4.14e-09	9.91e-11	-35.9	15.0825	-0.270856	SSTR3	somatostatin receptor 3
213297_at	4.14e-09	9.92e-11	35.9	15.0818	0.826504	RMND5B	required for meiotic nuclear division 5 homolog B (S. cerevisiae)
232844_at	4.15e-09	9.94e-11	-35.9	15.0786	-0.358563	IFT140	intraflagellar transport 140 homolog (Chlamydomonas)
1566248_at	4.17e-09	1e-10	-35.8	15.0721	-0.502328
210132_at	4.23e-09	1.01e-10	35.8	15.0573	0.495598	EFNA3	ephrin-A3
239209_at	4.23e-09	1.02e-10	35.8	15.0555	0.810813
231441_at	4.23e-09	1.02e-10	-35.8	15.0543	-0.285949	C7orf62	chromosome 7 open reading frame 62
224258_at	4.24e-09	1.02e-10	35.8	15.0521	0.502497	DBIL5P2	diazepam binding inhibitor-like 5 pseudogene 2
204644_at	4.26e-09	1.03e-10	35.7	15.0436	0.429243	ENOX2	ecto-NOX disulfide-thiol exchanger 2
221195_at	4.26e-09	1.03e-10	35.7	15.0415	0.986646	RNFT1	ring finger protein, transmembrane 1
243322_at	4.26e-09	1.03e-10	-35.7	15.0411	-0.397482
215055_at	4.26e-09	1.03e-10	-35.7	15.041	-0.331623	B3GNTL1	UDP-GlcNAc:betaGal beta-1,3-N-acetylglucosaminyltransferase-like 1
230828_at	4.26e-09	1.03e-10	35.7	15.0403	0.461117	GRAMD2	GRAM domain containing 2
210846_x_at	4.26e-09	1.03e-10	-35.7	15.0402	-0.314201	TRIM14	tripartite motif containing 14
1569378_at	4.27e-09	1.03e-10	35.7	15.0365	0.416562	LINC00942	long intergenic non-protein coding RNA 942
227042_at	4.29e-09	1.04e-10	35.7	15.0312	0.457201	YDJC	YdjC homolog (bacterial)
1566549_at	4.3e-09	1.04e-10	35.7	15.0293	0.322158
1561670_at	4.33e-09	1.05e-10	-35.6	15.0212	-0.296393
233079_at	4.34e-09	1.05e-10	35.6	15.0179	0.486264
237646_x_at	4.34e-09	1.05e-10	-35.6	15.0166	-0.546227	PLEKHG5	pleckstrin homology domain containing, family G (with RhoGef domain) member 5
1569642_at	4.35e-09	1.06e-10	-35.6	15.0135	-0.381665	F2R	coagulation factor II (thrombin) receptor
220538_at	4.35e-09	1.06e-10	35.6	15.0113	2.48028	ADM2	adrenomedullin 2
220191_at	4.35e-09	1.06e-10	35.6	15.0102	0.503124	GKN1	gastrokine 1
1563884_at	4.4e-09	1.07e-10	35.6	14.9986	0.574436
240916_x_at	4.41e-09	1.08e-10	-35.5	14.993	-0.339305
235310_at	4.41e-09	1.08e-10	-35.5	14.9923	-0.31005	GCSAM	germinal center-associated, signaling and motility
239728_at	4.42e-09	1.08e-10	-35.5	14.9904	-0.247847
243480_at	4.42e-09	1.08e-10	-35.5	14.9894	-0.475013
236996_at	4.43e-09	1.08e-10	35.5	14.9862	0.512399
223832_s_at	4.43e-09	1.08e-10	35.5	14.9856	0.264899	CAPNS2	calpain, small subunit 2
208037_s_at	4.44e-09	1.09e-10	-35.5	14.9817	-0.987904	MADCAM1	mucosal vascular addressin cell adhesion molecule 1
242441_at	4.46e-09	1.09e-10	-35.5	14.9757	-0.305686	LOC646548	ADAM metallopeptidase domain 20 pseudogene
243025_at	4.46e-09	1.09e-10	35.5	14.9746	0.306613
1569746_s_at	4.5e-09	1.1e-10	-35.4	14.9658	-0.322617	OSER1-AS1	OSER1 antisense RNA 1 (head to head)
211607_x_at	4.5e-09	1.11e-10	35.4	14.963	1.63942	EGFR	epidermal growth factor receptor
207884_at	4.51e-09	1.11e-10	-35.4	14.9598	-0.275488	GUCY2D	guanylate cyclase 2D, membrane (retina-specific)
241057_x_at	4.55e-09	1.12e-10	35.4	14.9498	0.858328
230905_at	4.56e-09	1.12e-10	35.4	14.9474	0.453762
226253_at	4.57e-09	1.12e-10	35.3	14.9445	1.01146	LRRC45	leucine rich repeat containing 45
220097_s_at	4.57e-09	1.13e-10	35.3	14.944	1.48732	TMEM104	transmembrane protein 104
1555205_at	4.64e-09	1.15e-10	35.3	14.9246	0.275789
1569560_at	4.64e-09	1.15e-10	35.3	14.9238	0.422749	HIRA	histone cell cycle regulator
1570225_at	4.65e-09	1.15e-10	-35.3	14.921	-0.456414	TMEM150B	transmembrane protein 150B
236625_at	4.68e-09	1.16e-10	-35.2	14.9143	-0.371979
230632_at	4.68e-09	1.16e-10	35.2	14.914	0.495476	IL10RB-AS1	IL10RB antisense RNA 1 (head to head)
219881_s_at	4.69e-09	1.16e-10	-35.2	14.9092	-0.513229	LOC100507619	uncharacterized LOC100507619
235397_at	4.7e-09	1.16e-10	-35.2	14.906	-0.298008	LINC00174	long intergenic non-protein coding RNA 174
206126_at	4.7e-09	1.17e-10	-35.2	14.9051	-0.270633	CXCR5	chemokine (C-X-C motif) receptor 5
243828_at	4.71e-09	1.17e-10	35.2	14.9018	0.426545
219586_at	4.77e-09	1.18e-10	-35.1	14.8882	-0.320039	WDR59	WD repeat domain 59
1561194_at	4.77e-09	1.18e-10	35.1	14.8876	0.309147
1555356_a_at	4.78e-09	1.19e-10	-35.1	14.8854	-0.387255	SCML4	sex comb on midleg-like 4 (Drosophila)
1554332_a_at	4.83e-09	1.2e-10	35.1	14.8728	0.425996	LOC100127888	uncharacterized LOC100127888
222107_x_at	4.85e-09	1.21e-10	35.1	14.8662	0.690282	LZTS1	leucine zipper, putative tumor suppressor 1
233236_at	4.86e-09	1.21e-10	35	14.8634	0.317065	TSPAN16	tetraspanin 16
241102_at	4.86e-09	1.21e-10	35	14.8622	0.50073
234139_s_at	4.88e-09	1.22e-10	-35	14.8574	-0.348233
1561306_s_at	4.89e-09	1.22e-10	-35	14.8538	-0.27915	STRC	stereocilin
208068_x_at	4.89e-09	1.22e-10	-35	14.8532	-0.274569	GH2///GH1///CSHL1///CSH2///CSH1	growth hormone 2///growth hormone 1///chorionic somatomammotropin hormone-like 1///chorionic somatomammotropin hormone 2///chorionic somatomammotropin hormone 1 (placental lactogen)
233306_at	4.91e-09	1.23e-10	35	14.8488	0.298684
222318_at	4.91e-09	1.23e-10	35	14.8478	0.378678	ZNF324B	zinc finger protein 324B
205312_at	4.93e-09	1.24e-10	-35	14.8416	-0.346457	SPI1	spleen focus forming virus (SFFV) proviral integration oncogene spi1
244409_at	4.93e-09	1.24e-10	-35	14.8408	-0.269639	CCDC154	coiled-coil domain containing 154
1555299_s_at	4.97e-09	1.25e-10	-34.9	14.8319	-0.384374	ERVW-1	endogenous retrovirus group W, member 1
222905_s_at	5.01e-09	1.26e-10	34.9	14.8221	0.233993	TMEM143	transmembrane protein 143
211660_at	5.14e-09	1.29e-10	-34.8	14.7928	-0.474473	POU2F2	POU class 2 homeobox 2
207866_at	5.18e-09	1.3e-10	-34.8	14.7843	-0.321503	BMP8A	bone morphogenetic protein 8a
214613_at	5.2e-09	1.31e-10	-34.7	14.7803	-0.772103	GPR3	G protein-coupled receptor 3
232321_at	5.2e-09	1.31e-10	34.7	14.7796	0.362903	MUC17	mucin 17, cell surface associated
1556393_at	5.2e-09	1.31e-10	-34.7	14.7785	-0.650882
221112_at	5.2e-09	1.31e-10	34.7	14.778	0.309759	IL1RAPL2	interleukin 1 receptor accessory protein-like 2
1569448_at	5.24e-09	1.32e-10	34.7	14.7685	0.35574	PGM2L1	phosphoglucomutase 2-like 1
240810_at	5.24e-09	1.32e-10	-34.7	14.7672	-0.270618	MKNK1-AS1	MKNK1 antisense RNA 1
233761_at	5.24e-09	1.32e-10	34.7	14.7659	0.272133
1559755_at	5.24e-09	1.32e-10	-34.7	14.7656	-0.290767	C21orf49	chromosome 21 open reading frame 49
233403_x_at	5.3e-09	1.34e-10	-34.6	14.7529	-0.334365	TM6SF2	transmembrane 6 superfamily member 2
234494_x_at	5.3e-09	1.34e-10	-34.6	14.7519	-0.825872
213722_at	5.32e-09	1.35e-10	-34.6	14.7457	-0.329021	SOX2	SRY (sex determining region Y)-box 2
236334_at	5.41e-09	1.37e-10	-34.5	14.7272	-0.280886
1562896_at	5.42e-09	1.38e-10	-34.5	14.7247	-0.258052	TNRC18	trinucleotide repeat containing 18
1559635_at	5.46e-09	1.39e-10	-34.5	14.7163	-0.44092	CASC4	cancer susceptibility candidate 4
226367_at	5.49e-09	1.39e-10	-34.5	14.7094	-0.743402	KDM5A	lysine (K)-specific demethylase 5A
1556334_s_at	5.49e-09	1.4e-10	-34.5	14.7076	-0.360949
219781_s_at	5.5e-09	1.4e-10	-34.5	14.7062	-0.247802	ZNF771	zinc finger protein 771
242145_at	5.5e-09	1.4e-10	34.5	14.7047	0.545371
1570192_at	5.51e-09	1.4e-10	34.5	14.7023	0.31812
243814_at	5.51e-09	1.4e-10	-34.4	14.7012	-0.572086	ZMYND8	zinc finger, MYND-type containing 8
206915_at	5.53e-09	1.41e-10	34.4	14.6973	0.409749	NKX2-2	NK2 homeobox 2
1560523_at	5.55e-09	1.42e-10	34.4	14.691	0.31471
242079_at	5.66e-09	1.45e-10	-34.3	14.669	-0.391592	RGS12	regulator of G-protein signaling 12
1556195_a_at	5.75e-09	1.47e-10	34.3	14.652	0.407819
215251_at	5.75e-09	1.47e-10	-34.3	14.6506	-0.536471
239807_at	5.8e-09	1.48e-10	-34.2	14.6409	-1.3671
232555_at	5.8e-09	1.49e-10	-34.2	14.6402	-0.340436	CREB5	cAMP responsive element binding protein 5
219900_s_at	5.8e-09	1.49e-10	34.2	14.6391	0.740727	ZNF446	zinc finger protein 446
1552596_at	5.81e-09	1.49e-10	34.2	14.6361	0.291243	GAS2L2	growth arrest-specific 2 like 2
1559331_x_at	5.81e-09	1.49e-10	-34.2	14.636	-1.19763
227487_s_at	5.81e-09	1.49e-10	-34.2	14.6355	-0.339153	SERPINE2	serpin peptidase inhibitor, clade E (nexin, plasminogen activator inhibitor type 1), member 2
221680_s_at	5.85e-09	1.5e-10	-34.2	14.6264	-0.901603	ETV7	ets variant 7
1566236_at	5.86e-09	1.51e-10	34.2	14.6243	0.345389	DGCR12	DiGeorge syndrome critical region gene 12
211181_x_at	5.87e-09	1.51e-10	-34.2	14.6206	-0.262936	RUNX1	runt-related transcription factor 1
1566884_at	5.89e-09	1.52e-10	-34.1	14.6162	-0.276616
207393_at	5.91e-09	1.53e-10	-34.1	14.6115	-0.345179	HCRTR2	hypocretin (orexin) receptor 2
234813_at	6.04e-09	1.56e-10	-34	14.5883	-0.293405	TMEM108	transmembrane protein 108
217642_at	6.07e-09	1.57e-10	-34	14.5815	-0.283769	RNF40	ring finger protein 40, E3 ubiquitin protein ligase
212924_s_at	6.07e-09	1.57e-10	-34	14.5812	-0.538113	LSM4	LSM4 homolog, U6 small nuclear RNA associated (S. cerevisiae)
1563655_at	6.08e-09	1.57e-10	-34	14.5785	-0.245685	TNNT2	troponin T type 2 (cardiac)
1562074_a_at	6.12e-09	1.58e-10	34	14.5695	0.369269	UNC13C	unc-13 homolog C (C. elegans)
1552445_a_at	6.12e-09	1.59e-10	34	14.5687	0.632351	ESX1	ESX homeobox 1
240164_at	6.12e-09	1.59e-10	-34	14.5683	-0.384381	MUC4	mucin 4, cell surface associated
244081_at	6.16e-09	1.6e-10	-33.9	14.5604	-0.280999
1562598_at	6.18e-09	1.6e-10	-33.9	14.5557	-0.280651	DLG5-AS1	DLG5 antisense RNA 1
227360_at	6.2e-09	1.61e-10	33.9	14.5517	0.335273	RDH13	retinol dehydrogenase 13 (all-trans/9-cis)
222766_at	6.22e-09	1.62e-10	33.9	14.548	0.234739	POLR3K	polymerase (RNA) III (DNA directed) polypeptide K, 12.3 kDa
40020_at	6.22e-09	1.62e-10	33.9	14.5468	0.503498	CELSR3	cadherin, EGF LAG seven-pass G-type receptor 3
205999_x_at	6.22e-09	1.62e-10	-33.9	14.5456	-3.10627	CYP3A4	cytochrome P450, family 3, subfamily A, polypeptide 4
1554773_at	6.23e-09	1.62e-10	33.9	14.5442	0.284212	WFIKKN2	WAP, follistatin/kazal, immunoglobulin, kunitz and netrin domain containing 2
243676_at	6.23e-09	1.62e-10	-33.9	14.5438	-0.307517
205948_at	6.23e-09	1.63e-10	-33.9	14.5418	-0.323202	PTPRT	protein tyrosine phosphatase, receptor type, T
239877_at	6.23e-09	1.63e-10	33.9	14.5411	0.382514	LOC157740	uncharacterized protein C8orf9
244513_at	6.25e-09	1.63e-10	-33.9	14.537	-0.279197	TMEM161B	transmembrane protein 161B
241048_at	6.31e-09	1.65e-10	-33.8	14.5258	-0.389026
1554710_at	6.31e-09	1.65e-10	33.8	14.5248	0.372222	KCNMB1	potassium large conductance calcium-activated channel, subfamily M, beta member 1
220323_at	6.33e-09	1.66e-10	-33.8	14.5214	-0.252271	CNTD2	cyclin N-terminal domain containing 2
208105_at	6.34e-09	1.66e-10	-33.8	14.5187	-0.280294	GIPR	gastric inhibitory polypeptide receptor
1569738_at	6.35e-09	1.66e-10	-33.8	14.5162	-0.334536
1562433_at	6.38e-09	1.67e-10	33.8	14.5098	0.307471	FLJ10489	uncharacterized protein FLJ10489
224182_x_at	6.4e-09	1.68e-10	33.7	14.5053	0.270897	SEMA6B	sema domain, transmembrane domain (TM), and cytoplasmic domain, (semaphorin) 6B
240793_at	6.44e-09	1.69e-10	-33.7	14.4988	-1.05796	TTN	titin
228300_at	6.45e-09	1.7e-10	-33.7	14.4952	-0.261696	CCDC103	coiled-coil domain containing 103
214286_at	6.48e-09	1.7e-10	-33.7	14.4897	-0.401743	GNAT1	guanine nucleotide binding protein (G protein), alpha transducing activity polypeptide 1
223968_at	6.49e-09	1.71e-10	33.7	14.4881	0.412662	ZNF44	zinc finger protein 44
1556677_at	6.5e-09	1.71e-10	33.7	14.4854	0.275233
1558720_at	6.5e-09	1.71e-10	33.7	14.4837	0.40054
1557406_s_at	6.53e-09	1.72e-10	-33.6	14.4778	-0.336974	LOC100130111	uncharacterized LOC100130111
231321_s_at	6.54e-09	1.73e-10	-33.6	14.4758	-0.368539	ACER3	alkaline ceramidase 3
237965_at	6.58e-09	1.74e-10	-33.6	14.469	-0.247232
211190_x_at	6.62e-09	1.75e-10	33.6	14.4608	0.319231	CD84	CD84 molecule
211588_s_at	6.63e-09	1.75e-10	-33.6	14.4592	-0.982071	LOC652346///PML	probable transcription factor PML-like///promyelocytic leukemia
230392_at	6.63e-09	1.75e-10	-33.6	14.4583	-0.49075
232821_at	6.65e-09	1.76e-10	-33.6	14.4545	-0.54353	GTSF1L	gametocyte specific factor 1-like
1553063_at	6.65e-09	1.76e-10	33.6	14.4541	0.240443	GPR78	G protein-coupled receptor 78
215901_at	6.65e-09	1.76e-10	33.5	14.4521	0.462287	ZNF81	zinc finger protein 81
236354_at	6.66e-09	1.77e-10	-33.5	14.4501	-0.275421
1553740_a_at	6.66e-09	1.77e-10	-33.5	14.4498	-0.287838	IRAK2	interleukin-1 receptor-associated kinase 2
206696_at	6.66e-09	1.77e-10	-33.5	14.4479	-0.282042	GPR143	G protein-coupled receptor 143
233233_at	6.68e-09	1.78e-10	33.5	14.4439	0.374669	LOC100289610	mesenchymal stem cell protein DSC96
1568812_at	6.7e-09	1.79e-10	33.5	14.4392	0.292299	LOC100507140	uncharacterized LOC100507140
1562116_at	6.7e-09	1.79e-10	33.5	14.4391	0.349795
239284_at	6.7e-09	1.79e-10	-33.5	14.4384	-0.253753
237052_x_at	6.7e-09	1.79e-10	33.5	14.4379	1.02865	GIGYF2	GRB10 interacting GYF protein 2
1566671_a_at	6.73e-09	1.8e-10	-33.5	14.4329	-0.262532	PDXK	pyridoxal (pyridoxine, vitamin B6) kinase
1559654_s_at	6.73e-09	1.8e-10	-33.5	14.4316	-0.268757	LOC100289508	hypothetical protein LOC100289508
217596_at	6.75e-09	1.8e-10	-33.5	14.4288	-0.222695	UPF3A	UPF3 regulator of nonsense transcripts homolog A (yeast)
216128_at	6.78e-09	1.81e-10	-33.4	14.4219	-0.290567	TBCD	tubulin folding cofactor D
1565862_a_at	6.79e-09	1.82e-10	-33.4	14.4194	-0.274374
239564_at	6.82e-09	1.83e-10	-33.4	14.4144	-0.306762	LOC100128198	uncharacterized LOC100128198
1564039_at	6.84e-09	1.83e-10	33.4	14.4103	0.427228	ZSCAN23	zinc finger and SCAN domain containing 23
1558683_a_at	6.84e-09	1.83e-10	-33.4	14.4093	-0.294457	HMGA2	high mobility group AT-hook 2
1553253_at	6.84e-09	1.84e-10	33.4	14.4087	0.249262	ASB16	ankyrin repeat and SOCS box containing 16
226971_at	6.84e-09	1.84e-10	-33.4	14.4084	-0.353595	CCDC136	coiled-coil domain containing 136
214361_s_at	6.84e-09	1.84e-10	33.4	14.4055	0.402424	RGS12	regulator of G-protein signaling 12
208578_at	6.84e-09	1.84e-10	33.4	14.4054	0.219918	SCN10A	sodium channel, voltage-gated, type X, alpha subunit
211914_x_at	6.84e-09	1.84e-10	33.4	14.4052	0.755643	NF1	neurofibromin 1
236858_s_at	6.86e-09	1.85e-10	-33.4	14.4024	-0.270895
227244_s_at	6.86e-09	1.85e-10	33.4	14.402	0.672945	SSU72	SSU72 RNA polymerase II CTD phosphatase homolog (S. cerevisiae)
232009_at	6.91e-09	1.86e-10	-33.3	14.3933	-0.461778	EMR2	egf-like module containing, mucin-like, hormone receptor-like 2
243615_at	6.93e-09	1.87e-10	33.3	14.3875	0.267338
208327_at	6.93e-09	1.87e-10	-33.3	14.3873	-0.687642	CYP2A13	cytochrome P450, family 2, subfamily A, polypeptide 13
210579_s_at	6.94e-09	1.88e-10	33.3	14.3852	0.380293	TRIM10	tripartite motif containing 10
1565730_at	6.97e-09	1.88e-10	33.3	14.3797	0.293419	LOC100288224	hypothetical protein LOC100288224
236932_s_at	6.97e-09	1.89e-10	-33.3	14.3797	-0.327778	GATAD2A	GATA zinc finger domain containing 2A
221369_at	7.01e-09	1.9e-10	33.3	14.3732	0.428165	MTNR1A	melatonin receptor 1A
1559952_x_at	7.1e-09	1.92e-10	-33.2	14.3582	-0.524604	FAM66D///FAM66C	family with sequence similarity 66, member D///family with sequence similarity 66, member C
1561602_at	7.11e-09	1.93e-10	33.2	14.3546	0.421926	LOC100129476	uncharacterized LOC100129476
1561096_at	7.11e-09	1.93e-10	33.2	14.3545	0.41013	LOC285419	uncharacterized LOC285419
1569741_at	7.11e-09	1.93e-10	-33.2	14.3533	-0.44214
1561589_a_at	7.12e-09	1.93e-10	-33.2	14.3516	-0.364262	NBEAL1	neurobeachin-like 1
236792_at	7.12e-09	1.93e-10	33.2	14.3515	0.407804
1561199_at	7.27e-09	1.98e-10	33.1	14.328	0.309989
1570632_at	7.31e-09	1.99e-10	-33.1	14.3201	-0.347482
1564339_a_at	7.35e-09	2e-10	-33.1	14.3146	-0.350362	CHRM3	cholinergic receptor, muscarinic 3
228197_at	7.39e-09	2.01e-10	-33	14.3079	-0.342315	C1orf86	chromosome 1 open reading frame 86
217017_at	7.43e-09	2.03e-10	-33	14.3003	-0.329267	OSBPL10	oxysterol binding protein-like 10
1565859_at	7.43e-09	2.03e-10	-33	14.2997	-0.329601	SNORA71A	small nucleolar RNA, H/ACA box 71A
1569688_at	7.57e-09	2.07e-10	32.9	14.2792	0.288985	FMO5	flavin containing monooxygenase 5
240676_at	7.58e-09	2.07e-10	-32.9	14.2766	-0.63347
1561339_at	7.58e-09	2.07e-10	-32.9	14.2762	-0.317104
216329_at	7.58e-09	2.07e-10	32.9	14.275	0.253063
220510_at	7.61e-09	2.08e-10	32.9	14.2693	0.37801	RHBG	Rh family, B glycoprotein (gene/pseudogene)
1556721_at	7.61e-09	2.09e-10	32.9	14.2692	0.258513	C20orf203	chromosome 20 open reading frame 203
243111_at	7.61e-09	2.09e-10	-32.9	14.2691	-0.343718	ENTPD1	ectonucleoside triphosphate diphosphohydrolase 1
215866_at	7.63e-09	2.09e-10	-32.9	14.2643	-0.322056
240294_at	7.63e-09	2.09e-10	-32.9	14.2642	-0.245572	HIPK2	homeodomain interacting protein kinase 2
213442_x_at	7.63e-09	2.1e-10	32.9	14.2636	0.322697	SPDEF	SAM pointed domain containing ets transcription factor
237685_at	7.65e-09	2.1e-10	32.9	14.2593	0.313644	LOC339760	uncharacterized LOC339760
240060_at	7.7e-09	2.12e-10	32.8	14.2521	0.529897
216647_at	7.7e-09	2.12e-10	-32.8	14.2519	-0.235476	TCF3	transcription factor 3
1553209_at	7.74e-09	2.13e-10	32.8	14.2455	0.353447	RNFT2	ring finger protein, transmembrane 2
1556959_at	7.77e-09	2.14e-10	32.8	14.2406	0.732784	ANHX	anomalous homeobox
1556970_at	7.77e-09	2.14e-10	-32.8	14.2392	-0.375874	LOC100289312	hypothetical protein LOC100289312
1569274_at	7.84e-09	2.16e-10	32.8	14.2284	0.376856	C14orf182	chromosome 14 open reading frame 182
216492_at	7.85e-09	2.17e-10	32.8	14.2259	0.274565	KIR3DX1	killer cell immunoglobulin-like receptor, three domains, X1
234175_at	7.85e-09	2.17e-10	32.7	14.2248	0.361778
1555437_at	7.85e-09	2.17e-10	-32.7	14.2244	-0.454111	EARS2	glutamyl-tRNA synthetase 2, mitochondrial
1555675_at	7.85e-09	2.17e-10	-32.7	14.2244	-0.342262	BLID	BH3-like motif containing, cell death inducer
1569386_at	7.85e-09	2.17e-10	32.7	14.2242	0.262338
236826_at	7.86e-09	2.18e-10	-32.7	14.2216	-1.04221	TTC39B	tetratricopeptide repeat domain 39B
1554613_a_at	7.86e-09	2.18e-10	-32.7	14.2203	-1.26973	KIAA0226	KIAA0226
242723_at	7.88e-09	2.19e-10	32.7	14.2169	0.340958
207771_at	7.88e-09	2.19e-10	-32.7	14.2168	-0.285814	SLC5A2	solute carrier family 5 (sodium/glucose cotransporter), member 2
240840_s_at	7.94e-09	2.21e-10	32.7	14.2078	0.281168	SETD9	SET domain containing 9
1553166_at	8.01e-09	2.23e-10	-32.7	14.1978	-0.254041	CDH24	cadherin 24, type 2
1556453_at	8.05e-09	2.24e-10	32.6	14.1907	0.316166	LOC100506274	uncharacterized LOC100506274
242999_at	8.09e-09	2.25e-10	32.6	14.185	0.336127	ARHGEF7	Rho guanine nucleotide exchange factor (GEF) 7
1561687_a_at	8.11e-09	2.26e-10	32.6	14.1818	0.380828	ZNF382	zinc finger protein 382
234322_at	8.17e-09	2.28e-10	32.6	14.1729	0.291176
1555792_a_at	8.23e-09	2.3e-10	-32.5	14.1638	-0.259808	CCDC116	coiled-coil domain containing 116
1570394_at	8.23e-09	2.3e-10	-32.5	14.1635	-0.33131	XRN1	5'-3' exoribonuclease 1
236612_at	8.24e-09	2.3e-10	32.5	14.1618	0.220534
241009_at	8.24e-09	2.3e-10	-32.5	14.1612	-0.361604	FOXN4	forkhead box N4
1570618_at	8.24e-09	2.3e-10	32.5	14.1596	0.39258
238552_at	8.28e-09	2.32e-10	-32.5	14.1534	-1.70773
229291_at	8.3e-09	2.33e-10	32.5	14.1498	0.333329	LOC100289210	hypothetical protein LOC100289210
236074_at	8.34e-09	2.34e-10	32.5	14.145	0.345874
236403_at	8.36e-09	2.34e-10	32.5	14.1414	0.316831	THAP7-AS1	THAP7 antisense RNA 1
1553430_a_at	8.4e-09	2.36e-10	-32.4	14.1346	-0.341986	EDARADD	EDAR-associated death domain
217045_x_at	8.4e-09	2.36e-10	-32.4	14.1344	-1.03799	NCR2	natural cytotoxicity triggering receptor 2
1559444_at	8.41e-09	2.36e-10	32.4	14.1323	0.382724
1558837_a_at	8.43e-09	2.37e-10	-32.4	14.1294	-1.88891
217509_x_at	8.43e-09	2.37e-10	32.4	14.1284	0.448582	GRIK5	glutamate receptor, ionotropic, kainate 5
231533_at	8.44e-09	2.38e-10	32.4	14.1266	0.319921
1554646_at	8.44e-09	2.38e-10	32.4	14.1256	0.491904	OSBPL1A	oxysterol binding protein-like 1A
227024_s_at	8.45e-09	2.38e-10	-32.4	14.1233	-0.25102	MRPL55	mitochondrial ribosomal protein L55
1557664_at	8.47e-09	2.39e-10	32.4	14.121	0.301618	LOC340239	uncharacterized LOC340239
233585_at	8.48e-09	2.39e-10	-32.4	14.1178	-0.294744	SDK2	sidekick cell adhesion molecule 2
242992_at	8.52e-09	2.41e-10	32.4	14.1126	0.29986	ZNF551	zinc finger protein 551
243266_at	8.64e-09	2.44e-10	-32.3	14.0967	-0.260827
220533_at	8.64e-09	2.44e-10	-32.3	14.0958	-0.616507
237230_at	8.66e-09	2.45e-10	-32.3	14.0923	-0.379044	GPHA2	glycoprotein hormone alpha 2
1553432_s_at	8.73e-09	2.47e-10	32.3	14.0835	0.306311	LOC653786///OTOA	otoancorin pseudogene///otoancorin
37796_at	8.78e-09	2.49e-10	-32.2	14.0755	-0.260279	SAP25///LRCH4	Sin3A-associated protein, 25kDa///leucine-rich repeats and calponin homology (CH) domain containing 4
233283_at	8.9e-09	2.52e-10	32.2	14.0607	0.278512
233727_at	8.92e-09	2.53e-10	32.2	14.0576	0.315739
1552491_at	8.95e-09	2.54e-10	32.2	14.053	0.264329	IDI2	isopentenyl-diphosphate delta isomerase 2
216382_s_at	8.96e-09	2.55e-10	32.1	14.0505	0.253459	KMT2D	lysine (K)-specific methyltransferase 2D
1569700_s_at	9.04e-09	2.57e-10	32.1	14.0399	0.25722	AK7	adenylate kinase 7
1563597_at	9.08e-09	2.58e-10	-32.1	14.0351	-0.278416
1562657_a_at	9.13e-09	2.6e-10	32.1	14.0284	0.61481	C10orf90	chromosome 10 open reading frame 90
229380_at	9.14e-09	2.6e-10	-32.1	14.0266	-0.62747	ILDR2	immunoglobulin-like domain containing receptor 2
240367_at	9.14e-09	2.6e-10	32.1	14.026	0.368177
206395_at	9.15e-09	2.61e-10	-32.1	14.0234	-0.282847	DGKG	diacylglycerol kinase, gamma 90kDa
219971_at	9.22e-09	2.63e-10	32	14.0147	0.356305	IL21R	interleukin 21 receptor
230123_at	9.22e-09	2.63e-10	-32	14.0139	-0.23707	NECAP2	NECAP endocytosis associated 2
1552608_at	9.22e-09	2.63e-10	-32	14.0139	-0.380297	WFDC11	WAP four-disulfide core domain 11
235038_at	9.23e-09	2.64e-10	32	14.0114	0.949834	KRR1	KRR1, small subunit (SSU) processome component, homolog (yeast)
1570534_a_at	9.25e-09	2.65e-10	-32	14.008	-0.593761	ZNF483	zinc finger protein 483
228966_at	9.33e-09	2.67e-10	32	13.998	0.596569	PANK2	pantothenate kinase 2
231284_at	9.41e-09	2.7e-10	-31.9	13.9879	-0.603004	LOC100506406	uncharacterized LOC100506406
220114_s_at	9.41e-09	2.7e-10	-31.9	13.9877	-0.273748	STAB2	stabilin 2
1553399_a_at	9.41e-09	2.7e-10	31.9	13.9866	0.217208	CRHR1-IT1	CRHR1 intronic transcript 1 (non-protein coding)
231151_at	9.42e-09	2.7e-10	-31.9	13.9852	-0.272375	DLGAP3	discs, large (Drosophila) homolog-associated protein 3
240424_s_at	9.49e-09	2.72e-10	31.9	13.9765	0.331294	LOC441204	uncharacterized LOC441204
1557791_at	9.49e-09	2.73e-10	-31.9	13.9749	-0.317408	LOC100132051	hypothetical LOC100132051
207270_x_at	9.69e-09	2.79e-10	-31.8	13.9514	-1.7346	CD300C	CD300c molecule
214456_x_at	9.73e-09	2.8e-10	-31.8	13.9467	-0.388208	SAA2///SAA1	serum amyloid A2///serum amyloid A1
234308_at	9.75e-09	2.81e-10	31.8	13.9441	0.235522	TUBGCP6	tubulin, gamma complex associated protein 6
243312_at	9.77e-09	2.82e-10	-31.8	13.9402	-0.243632	ZNF107	zinc finger protein 107
1569351_at	9.81e-09	2.83e-10	31.8	13.936	0.242208	SOBP	sine oculis binding protein homolog (Drosophila)
214460_at	9.87e-09	2.85e-10	31.7	13.9273	0.354867	LSAMP	limbic system-associated membrane protein
1554554_at	9.87e-09	2.85e-10	31.7	13.9267	0.281454	CCDC57	coiled-coil domain containing 57
242994_at	9.87e-09	2.85e-10	31.7	13.9266	1.08591
1563427_at	9.87e-09	2.85e-10	-31.7	13.9255	-0.454382
205669_at	9.98e-09	2.89e-10	-31.7	13.9129	-0.469205	NCAM2	neural cell adhesion molecule 2
216127_at	1e-08	2.89e-10	-31.7	13.9098	-0.466927	PDIA2	protein disulfide isomerase family A, member 2
238509_at	1e-08	2.9e-10	-31.7	13.9092	-1.15602	CUL1	cullin 1
243543_at	1e-08	2.91e-10	31.7	13.9055	2.10369
244037_at	1e-08	2.91e-10	-31.7	13.9036	-0.312511
1553134_s_at	1.01e-08	2.93e-10	31.6	13.898	0.476097	C9orf72	chromosome 9 open reading frame 72
221947_at	1.01e-08	2.93e-10	31.6	13.8977	1.2052	IL17RC	interleukin 17 receptor C
205216_s_at	1.01e-08	2.94e-10	31.6	13.8945	0.328754	APOH	apolipoprotein H (beta-2-glycoprotein I)
240571_at	1.01e-08	2.95e-10	31.6	13.8908	0.265863
211692_s_at	1.03e-08	2.98e-10	-31.6	13.8777	-0.838578	BBC3	BCL2 binding component 3
1563484_at	1.03e-08	2.99e-10	-31.6	13.8745	-0.234865
219418_at	1.04e-08	3.03e-10	-31.5	13.8602	-0.196941	NHEJ1	nonhomologous end-joining factor 1
220653_at	1.04e-08	3.04e-10	31.5	13.8564	0.484936	ZIM2	zinc finger, imprinted 2
234130_at	1.04e-08	3.04e-10	-31.5	13.8556	-0.261002	LDB3	LIM domain binding 3
243051_at	1.05e-08	3.05e-10	31.5	13.8526	0.325882	CNIH4	cornichon homolog 4 (Drosophila)
204876_at	1.05e-08	3.07e-10	-31.5	13.8441	-0.301875	ZNF646	zinc finger protein 646
232173_at	1.05e-08	3.08e-10	-31.4	13.8424	-0.290345	CLEC2L	C-type lectin domain family 2, member L
37022_at	1.06e-08	3.09e-10	-31.4	13.84	-0.283376	PRELP	proline/arginine-rich end leucine-rich repeat protein
238728_at	1.07e-08	3.12e-10	31.4	13.8283	1.54857
1561134_at	1.07e-08	3.13e-10	31.4	13.8259	0.303659
240888_at	1.08e-08	3.15e-10	31.4	13.8173	0.30155
236069_at	1.08e-08	3.16e-10	-31.4	13.8149	-0.285815
221141_x_at	1.08e-08	3.18e-10	31.3	13.8078	0.677974	EPN1	epsin 1
237843_at	1.09e-08	3.18e-10	-31.3	13.8052	-0.47482
239706_x_at	1.09e-08	3.2e-10	31.3	13.8001	0.354164
1553249_at	1.09e-08	3.21e-10	31.3	13.7969	0.316306	SMC1B	structural maintenance of chromosomes 1B
244713_at	1.09e-08	3.22e-10	-31.3	13.7936	-0.262363
236533_at	1.09e-08	3.22e-10	-31.3	13.793	-0.234669	ASAP1	ArfGAP with SH3 domain, ankyrin repeat and PH domain 1
222081_at	1.1e-08	3.24e-10	31.3	13.7862	0.285102	SIRT5	sirtuin 5
236819_at	1.1e-08	3.25e-10	-31.2	13.7832	-0.857597	PTBP1	polypyrimidine tract binding protein 1
1555952_at	1.1e-08	3.25e-10	-31.2	13.7818	-0.231287	SLC19A1	solute carrier family 19 (folate transporter), member 1
1556250_at	1.11e-08	3.26e-10	-31.2	13.7783	-0.360462
236051_at	1.11e-08	3.28e-10	31.2	13.7718	0.398515
238248_at	1.11e-08	3.29e-10	-31.2	13.7692	-0.298858	UMOD	uromodulin
224271_x_at	1.11e-08	3.29e-10	-31.2	13.7684	-0.518724	FRMD8P1	FERM domain containing 8 pseudogene 1
243103_at	1.12e-08	3.31e-10	31.2	13.7624	0.444853
244182_at	1.12e-08	3.33e-10	31.2	13.7579	0.413562
221852_at	1.13e-08	3.35e-10	31.1	13.7507	0.277057
1552303_a_at	1.13e-08	3.35e-10	31.1	13.7506	0.869879	TMEM106A	transmembrane protein 106A
222711_s_at	1.13e-08	3.35e-10	31.1	13.7502	0.969611	RHBDF1	rhomboid 5 homolog 1 (Drosophila)
1563783_a_at	1.13e-08	3.35e-10	-31.1	13.7487	-0.493524	ZNF333	zinc finger protein 333
241540_at	1.13e-08	3.35e-10	-31.1	13.7487	-0.240865
236776_at	1.13e-08	3.36e-10	-31.1	13.7464	-0.298558
1558115_at	1.13e-08	3.37e-10	-31.1	13.7437	-0.439373	RECK	reversion-inducing-cysteine-rich protein with kazal motifs
220151_at	1.13e-08	3.37e-10	31.1	13.7435	0.244169	C19orf73	chromosome 19 open reading frame 73
240013_at	1.14e-08	3.38e-10	-31.1	13.7383	-0.382789
231661_at	1.14e-08	3.4e-10	-31.1	13.7339	-0.312679	REG3G	regenerating islet-derived 3 gamma
205970_at	1.14e-08	3.41e-10	31.1	13.7309	0.357447	MT3	metallothionein 3
234109_x_at	1.14e-08	3.41e-10	31.1	13.7301	0.288859	ONECUT3	one cut homeobox 3
1569374_at	1.15e-08	3.41e-10	-31.1	13.7288	-0.23755	C3orf62	chromosome 3 open reading frame 62
238400_at	1.15e-08	3.44e-10	-31	13.7219	-0.238212	ENDOV	endonuclease V
244281_at	1.15e-08	3.44e-10	31	13.7201	0.422709	REXO1	REX1, RNA exonuclease 1 homolog (S. cerevisiae)
204583_x_at	1.15e-08	3.45e-10	-31	13.7181	-0.293383	KLK3	kallikrein-related peptidase 3
243947_s_at	1.16e-08	3.45e-10	-31	13.716	-0.361516
1554286_at	1.16e-08	3.46e-10	-31	13.7139	-0.247906	FLJ25758	MAP/microtubule affinity-regulating kinase 1 pseudogene
1560476_at	1.17e-08	3.5e-10	-31	13.7005	-1.3839
1567612_at	1.18e-08	3.54e-10	30.9	13.6898	0.409086
1554039_at	1.19e-08	3.56e-10	30.9	13.6841	0.808897	C14orf159	chromosome 14 open reading frame 159
1562946_at	1.19e-08	3.56e-10	30.9	13.6832	0.381678
214880_x_at	1.2e-08	3.59e-10	30.9	13.6733	1.5199	CALD1	caldesmon 1
231255_at	1.2e-08	3.6e-10	30.9	13.6693	1.05311	MPRIP	myosin phosphatase Rho interacting protein
1552833_at	1.2e-08	3.62e-10	-30.9	13.6656	-0.243466	B3GNT6	UDP-GlcNAc:betaGal beta-1,3-N-acetylglucosaminyltransferase 6 (core 3 synthase)
238388_x_at	1.2e-08	3.62e-10	-30.9	13.6651	-0.232223
1557754_at	1.21e-08	3.63e-10	30.8	13.661	0.324856	LOC401068	uncharacterized LOC401068
1553352_x_at	1.21e-08	3.64e-10	30.8	13.6588	0.343095	ERVW-1	endogenous retrovirus group W, member 1
216743_at	1.21e-08	3.64e-10	30.8	13.6577	0.343533
212962_at	1.21e-08	3.64e-10	-30.8	13.6574	-0.379085	SYDE1	synapse defective 1, Rho GTPase, homolog 1 (C. elegans)
1560499_at	1.21e-08	3.65e-10	30.8	13.656	0.332464	C14orf64	chromosome 14 open reading frame 64
244252_at	1.21e-08	3.66e-10	30.8	13.6521	0.484265	LOC399884	uncharacterized LOC399884
1570362_at	1.22e-08	3.68e-10	-30.8	13.6463	-0.22873	LOC100288009	hypothetical protein LOC100288009
244124_at	1.22e-08	3.68e-10	30.8	13.6458	0.502449	RAB37	RAB37, member RAS oncogene family
206758_at	1.22e-08	3.68e-10	30.8	13.6456	0.261173	EDN2	endothelin 2
1555933_at	1.22e-08	3.7e-10	-30.8	13.6421	-0.425639	KIAA2013	KIAA2013
240699_at	1.23e-08	3.72e-10	-30.8	13.6362	-0.244384	SEC14L3	SEC14-like 3 (S. cerevisiae)
205820_s_at	1.23e-08	3.73e-10	30.8	13.6328	0.274624	APOC3	apolipoprotein C-III
205874_at	1.24e-08	3.74e-10	30.7	13.6279	0.29321	ITPKA	inositol-trisphosphate 3-kinase A
211128_at	1.24e-08	3.75e-10	30.7	13.6256	0.24604	EDA	ectodysplasin A
236750_at	1.24e-08	3.76e-10	30.7	13.6221	1.49305
206948_at	1.25e-08	3.79e-10	30.7	13.6149	0.247058	NEU3	sialidase 3 (membrane sialidase)
232134_at	1.25e-08	3.81e-10	-30.7	13.6086	-1.04372
206697_s_at	1.25e-08	3.81e-10	30.7	13.6078	0.55046	HP	haptoglobin
1563641_a_at	1.25e-08	3.81e-10	-30.7	13.6072	-0.249505	SNX20	sorting nexin 20
240730_at	1.26e-08	3.82e-10	30.7	13.6049	0.304926
1561509_at	1.26e-08	3.83e-10	-30.7	13.6041	-0.265874
219963_at	1.26e-08	3.83e-10	-30.7	13.6015	-0.253613	DUSP13	dual specificity phosphatase 13
224292_at	1.26e-08	3.85e-10	30.6	13.5968	0.243282	TTTY13	testis-specific transcript, Y-linked 13 (non-protein coding)
230990_at	1.27e-08	3.86e-10	30.6	13.5933	0.249804	KIF13A	kinesin family member 13A
243053_x_at	1.27e-08	3.88e-10	30.6	13.5897	0.347043	LOC100128079	uncharacterized LOC100128079
235991_at	1.27e-08	3.88e-10	30.6	13.5879	0.607649	CYB5RL	cytochrome b5 reductase-like
213919_at	1.27e-08	3.89e-10	-30.6	13.5863	-0.213827	DNAJC4	DnaJ (Hsp40) homolog, subfamily C, member 4
226083_at	1.28e-08	3.9e-10	30.6	13.5824	0.37544	TMEM70	transmembrane protein 70
1568827_at	1.28e-08	3.92e-10	-30.6	13.5763	-0.291319	LOC401442	uncharacterized LOC401442
239943_x_at	1.28e-08	3.93e-10	30.6	13.5757	0.779066
216206_x_at	1.29e-08	3.94e-10	-30.6	13.5716	-0.291433	MAP2K7	mitogen-activated protein kinase kinase 7
239759_at	1.29e-08	3.95e-10	-30.6	13.57	-0.32428
233483_at	1.29e-08	3.96e-10	-30.5	13.5665	-0.378501	TBC1D27	TBC1 domain family, member 27
205616_at	1.3e-08	3.98e-10	-30.5	13.5593	-0.354184	KCNA6	potassium voltage-gated channel, shaker-related subfamily, member 6
219977_at	1.31e-08	4.01e-10	-30.5	13.5521	-0.308256	AIPL1	aryl hydrocarbon receptor interacting protein-like 1
234034_at	1.31e-08	4.02e-10	-30.5	13.5485	-0.481346
206888_s_at	1.32e-08	4.06e-10	-30.5	13.5401	-0.243636	ARHGDIG	Rho GDP dissociation inhibitor (GDI) gamma
234271_at	1.32e-08	4.06e-10	30.5	13.5399	0.271786	OTOP2	otopetrin 2
236800_at	1.32e-08	4.07e-10	-30.4	13.535	-0.28553	UCMA	upper zone of growth plate and cartilage matrix associated
1567274_at	1.32e-08	4.08e-10	-30.4	13.5342	-0.241305
243152_at	1.33e-08	4.09e-10	30.4	13.5316	0.241998	COPS8	COP9 signalosome subunit 8
210081_at	1.33e-08	4.11e-10	-30.4	13.5259	-0.381947	AGER	advanced glycosylation end product-specific receptor
1566108_at	1.33e-08	4.11e-10	-30.4	13.5249	-0.580096	MYNN	myoneurin
1555016_at	1.33e-08	4.12e-10	30.4	13.5238	0.353082	IL16	interleukin 16
1553761_at	1.33e-08	4.12e-10	30.4	13.5231	0.349106	PRR14L	proline rich 14-like
215423_at	1.34e-08	4.15e-10	30.4	13.5139	0.255509
1555476_at	1.35e-08	4.18e-10	-30.3	13.5057	-0.298956	IREB2	iron-responsive element binding protein 2
1555620_a_at	1.35e-08	4.19e-10	30.3	13.5055	0.208945	PTGIR	prostaglandin I2 (prostacyclin) receptor (IP)
1558948_a_at	1.36e-08	4.22e-10	-30.3	13.4966	-0.307004
1553804_a_at	1.36e-08	4.23e-10	-30.3	13.4947	-0.405518	SPATA32	spermatogenesis associated 32
233484_at	1.36e-08	4.23e-10	-30.3	13.4946	-0.238907
219425_at	1.36e-08	4.23e-10	-30.3	13.494	-1.95807	SULT4A1	sulfotransferase family 4A, member 1
1552924_a_at	1.36e-08	4.23e-10	30.3	13.4939	0.448921	PITPNM2	phosphatidylinositol transfer protein, membrane-associated 2
1552602_at	1.36e-08	4.24e-10	-30.3	13.4923	-0.244068	CACNG5	calcium channel, voltage-dependent, gamma subunit 5
221101_at	1.37e-08	4.24e-10	-30.3	13.491	-0.301694
1553534_at	1.37e-08	4.26e-10	-30.3	13.4847	-0.335881	NLRP10	NLR family, pyrin domain containing 10
220328_at	1.37e-08	4.27e-10	30.3	13.4844	0.356768	PHC3	polyhomeotic homolog 3 (Drosophila)
236399_at	1.38e-08	4.3e-10	30.2	13.4763	0.364749
217614_at	1.38e-08	4.3e-10	30.2	13.4753	0.24846
1564212_at	1.39e-08	4.32e-10	-30.2	13.4712	-0.395611	LOC100289084	similar to mitochondrial ribosomal protein L42
230574_at	1.39e-08	4.33e-10	-30.2	13.467	-0.252693	LOC100130938	uncharacterized LOC100130938
229102_at	1.39e-08	4.34e-10	-30.2	13.466	-0.247672	HTATIP2	HIV-1 Tat interactive protein 2, 30kDa
215700_x_at	1.39e-08	4.34e-10	-30.2	13.4648	-0.226562	CPNE6	copine VI (neuronal)
219813_at	1.4e-08	4.36e-10	30.2	13.4595	0.825208	LATS1	large tumor suppressor kinase 1
1560422_at	1.4e-08	4.37e-10	30.2	13.4577	0.664064
1570100_at	1.4e-08	4.38e-10	30.2	13.4549	0.450145
228406_at	1.4e-08	4.39e-10	30.2	13.4519	0.64401	SMYD1	SET and MYND domain containing 1
231511_at	1.4e-08	4.4e-10	-30.2	13.4515	-0.252426	FRAS1	Fraser syndrome 1
1558437_at	1.41e-08	4.42e-10	30.2	13.4453	0.228211	IGHE	immunoglobulin heavy constant epsilon
1553919_at	1.42e-08	4.44e-10	30.1	13.4395	0.351328	C9orf62	chromosome 9 open reading frame 62
237597_at	1.42e-08	4.46e-10	-30.1	13.4356	-0.325141	LOC100507525	uncharacterized LOC100507525
216167_at	1.42e-08	4.46e-10	-30.1	13.4349	-0.455351	LRRN2	leucine rich repeat neuronal 2
1566633_at	1.43e-08	4.47e-10	30.1	13.4323	0.290304
214466_at	1.43e-08	4.48e-10	30.1	13.4302	0.242237	GJA5	gap junction protein, alpha 5, 40kDa
242067_at	1.44e-08	4.52e-10	30.1	13.4207	0.575306
1563822_at	1.44e-08	4.53e-10	-30.1	13.4186	-0.310483	LOC100131763	uncharacterized LOC100131763
1566464_at	1.44e-08	4.53e-10	-30.1	13.4184	-0.410223	KCNK1	potassium channel, subfamily K, member 1
229780_at	1.44e-08	4.53e-10	-30.1	13.4179	-0.231505	MTSS1	metastasis suppressor 1
233787_at	1.44e-08	4.54e-10	-30.1	13.4166	-0.54285	C6orf163	chromosome 6 open reading frame 163
1553675_at	1.44e-08	4.54e-10	30.1	13.4155	0.224881	KLC4	kinesin light chain 4
222046_at	1.44e-08	4.55e-10	-30.1	13.4146	-1.9759	SRRT	serrate RNA effector molecule homolog (Arabidopsis)
39763_at	1.44e-08	4.56e-10	30	13.4124	0.237534	HPX	hemopexin
210326_at	1.45e-08	4.57e-10	-30	13.4091	-0.303303	AGXT	alanine-glyoxylate aminotransferase
230521_at	1.45e-08	4.58e-10	30	13.4059	0.53661	ARHGEF39	Rho guanine nucleotide exchange factor (GEF) 39
232503_at	1.45e-08	4.59e-10	-30	13.4051	-0.336204
1556899_at	1.45e-08	4.59e-10	-30	13.4037	-0.294417	PRMT5-AS1	PRMT5 antisense RNA 1
236040_at	1.48e-08	4.68e-10	29.9	13.3822	0.289636	XAGE3	X antigen family, member 3
216947_at	1.48e-08	4.7e-10	-29.9	13.3791	-0.446313	DES	desmin
242806_at	1.48e-08	4.7e-10	29.9	13.3777	0.243454
206823_at	1.49e-08	4.71e-10	-29.9	13.3752	-0.329175	L3MBTL1	l(3)mbt-like 1 (Drosophila)
1562895_at	1.49e-08	4.71e-10	-29.9	13.3747	-0.334099
231117_at	1.49e-08	4.73e-10	-29.9	13.3712	-0.226446	FAM181A	family with sequence similarity 181, member A
238747_at	1.49e-08	4.73e-10	-29.9	13.3707	-0.302848
227602_at	1.49e-08	4.74e-10	-29.9	13.3694	-0.383389	RAB7A	RAB7A, member RAS oncogene family
234931_at	1.49e-08	4.74e-10	-29.9	13.3693	-0.250448
235994_s_at	1.49e-08	4.74e-10	29.9	13.3692	0.341482	TINCR	tissue differentiation-inducing non-protein coding RNA
216203_at	1.49e-08	4.74e-10	-29.9	13.3689	-0.25053	SPTLC2	serine palmitoyltransferase, long chain base subunit 2
243811_at	1.5e-08	4.77e-10	29.9	13.3618	0.331031
244399_at	1.5e-08	4.77e-10	29.9	13.3614	0.310636
231008_at	1.51e-08	4.81e-10	-29.9	13.3526	-2.75029	UNC5CL	unc-5 homolog C (C. elegans)-like
238975_at	1.51e-08	4.82e-10	-29.8	13.3499	-0.301607	MMAB	methylmalonic aciduria (cobalamin deficiency) cblB type
217090_at	1.51e-08	4.82e-10	29.8	13.3497	0.333699	ADAM3A	ADAM metallopeptidase domain 3A (pseudogene)
243849_at	1.52e-08	4.84e-10	29.8	13.3452	0.245404	TMEM37	transmembrane protein 37
232965_at	1.52e-08	4.87e-10	29.8	13.3402	0.494662	LOC400684	uncharacterized LOC400684
208495_at	1.52e-08	4.87e-10	-29.8	13.3399	-0.271239	TLX3	T-cell leukemia homeobox 3
221033_s_at	1.52e-08	4.88e-10	-29.8	13.3378	-0.346306	RNF17	ring finger protein 17
221108_at	1.52e-08	4.88e-10	29.8	13.3363	1.1509	C22orf43	chromosome 22 open reading frame 43
219941_at	1.52e-08	4.88e-10	-29.8	13.3361	-0.279761	TMEM19	transmembrane protein 19
37201_at	1.53e-08	4.9e-10	-29.8	13.3326	-0.2627	ITIH4	inter-alpha-trypsin inhibitor heavy chain family, member 4
1560748_at	1.53e-08	4.92e-10	29.8	13.3281	0.565886
1556905_at	1.54e-08	4.94e-10	-29.8	13.3226	-0.559759	ZNF577	zinc finger protein 577
207823_s_at	1.54e-08	4.94e-10	-29.8	13.3224	-0.276063	AIF1	allograft inflammatory factor 1
237595_at	1.54e-08	4.95e-10	29.8	13.321	0.37285
232701_at	1.54e-08	4.96e-10	-29.7	13.3182	-0.249966
215607_x_at	1.55e-08	4.98e-10	29.7	13.3154	0.893004
219160_s_at	1.57e-08	5.04e-10	-29.7	13.3012	-0.223499	PAPOLG	poly(A) polymerase gamma
217115_at	1.58e-08	5.07e-10	29.7	13.2941	0.316406
208275_x_at	1.6e-08	5.17e-10	29.6	13.2743	0.252581	UTF1	undifferentiated embryonic cell transcription factor 1
1569410_at	1.61e-08	5.18e-10	29.6	13.271	0.444246	FLG2	filaggrin family member 2
239424_at	1.61e-08	5.18e-10	-29.6	13.2709	-0.237871
1565684_at	1.61e-08	5.21e-10	29.6	13.2653	0.322743	LOC400940	uncharacterized LOC400940
208279_s_at	1.63e-08	5.25e-10	-29.6	13.2571	-0.285659	CDRT1	CMT1A duplicated region transcript 1
1555393_s_at	1.63e-08	5.25e-10	29.6	13.2558	0.283622	C21orf67	chromosome 21 open reading frame 67
241178_at	1.63e-08	5.26e-10	29.5	13.2551	0.285907
237407_at	1.63e-08	5.27e-10	-29.5	13.2533	-0.245344	HS1BP3	HCLS1 binding protein 3
237644_at	1.64e-08	5.3e-10	29.5	13.2463	0.359939
1553059_at	1.64e-08	5.32e-10	29.5	13.242	0.356049	PGLYRP3	peptidoglycan recognition protein 3
231365_at	1.64e-08	5.33e-10	-29.5	13.2409	-0.293974
1569714_at	1.65e-08	5.36e-10	29.5	13.2347	1.31724	ZFYVE20	zinc finger, FYVE domain containing 20
216739_at	1.65e-08	5.36e-10	29.5	13.2331	0.239408
237487_at	1.67e-08	5.43e-10	29.4	13.2186	0.401287
232041_at	1.68e-08	5.44e-10	29.4	13.217	0.30417	INADL	InaD-like (Drosophila)
1556269_at	1.68e-08	5.47e-10	-29.4	13.2117	-0.467462	MYT1	myelin transcription factor 1
1559037_a_at	1.69e-08	5.49e-10	-29.4	13.2071	-0.397217
214062_x_at	1.69e-08	5.5e-10	29.4	13.2063	0.486754	NFKBIB	nuclear factor of kappa light polypeptide gene enhancer in B-cells inhibitor, beta
1567341_at	1.7e-08	5.53e-10	-29.4	13.1998	-0.370983	FOXD4	forkhead box D4
1560922_s_at	1.71e-08	5.57e-10	-29.4	13.1918	-0.290365	ZNF169	zinc finger protein 169
231635_x_at	1.71e-08	5.57e-10	29.4	13.1916	0.235452	RNF31	ring finger protein 31
1558525_at	1.71e-08	5.58e-10	29.3	13.1887	0.445561
1564552_at	1.72e-08	5.6e-10	-29.3	13.1853	-0.270294
1562899_at	1.72e-08	5.61e-10	29.3	13.1843	0.255774
243475_at	1.72e-08	5.62e-10	-29.3	13.1819	-0.215213	CBL	Cbl proto-oncogene, E3 ubiquitin protein ligase
241818_at	1.72e-08	5.62e-10	29.3	13.181	0.861149
235776_x_at	1.73e-08	5.64e-10	29.3	13.1772	0.411002	LOC100507197	hypothetical LOC100507197
1555478_at	1.74e-08	5.68e-10	29.3	13.171	0.338778	C17orf82	chromosome 17 open reading frame 82
222267_at	1.74e-08	5.69e-10	29.3	13.1673	0.619645	TMEM209	transmembrane protein 209
230021_at	1.75e-08	5.73e-10	29.3	13.1609	0.245155	TICRR	TOPBP1-interacting checkpoint and replication regulator
229619_at	1.75e-08	5.73e-10	-29.3	13.1604	-0.362868	FOLR2	folate receptor 2 (fetal)
240156_at	1.76e-08	5.78e-10	-29.2	13.1507	-0.238174
231312_at	1.77e-08	5.79e-10	-29.2	13.1489	-0.299127
1554675_a_at	1.77e-08	5.82e-10	29.2	13.1438	0.321706	SYCE1	synaptonemal complex central element protein 1
1562675_at	1.78e-08	5.83e-10	-29.2	13.1416	-0.702108
233753_at	1.78e-08	5.84e-10	-29.2	13.1388	-0.310699	SCAF4	SR-related CTD-associated factor 4
1553629_a_at	1.78e-08	5.85e-10	29.2	13.1376	0.288841	FAM71B	family with sequence similarity 71, member B
1552588_a_at	1.79e-08	5.88e-10	29.2	13.1324	0.311197	CNBD1	cyclic nucleotide binding domain containing 1
206160_at	1.79e-08	5.9e-10	29.2	13.1288	0.291948	APOBEC2	apolipoprotein B mRNA editing enzyme, catalytic polypeptide-like 2
227596_at	1.8e-08	5.93e-10	29.1	13.122	0.266335	FLJ37453	uncharacterized LOC729614
1562546_at	1.8e-08	5.94e-10	29.1	13.1212	1.37431	LOC100996486	uncharacterized LOC100996486
1569321_at	1.81e-08	5.98e-10	-29.1	13.1137	-0.221024
231055_at	1.81e-08	5.98e-10	-29.1	13.113	-0.304611
216744_at	1.82e-08	5.99e-10	-29.1	13.1112	-0.373286
236110_at	1.82e-08	6.03e-10	-29.1	13.1051	-0.295545
214208_at	1.82e-08	6.03e-10	-29.1	13.1048	-0.245119	KLHL35	kelch-like family member 35
1558440_at	1.82e-08	6.03e-10	-29.1	13.1037	-0.321901	LOC100506351	uncharacterized LOC100506351
1559634_at	1.82e-08	6.04e-10	29.1	13.1032	0.281853	CHRM3	cholinergic receptor, muscarinic 3
1554847_at	1.82e-08	6.04e-10	29.1	13.1032	0.381038	ATP6V1B1	ATPase, H+ transporting, lysosomal 56/58kDa, V1 subunit B1
242801_at	1.82e-08	6.04e-10	-29.1	13.1029	-0.241531
1559048_at	1.84e-08	6.08e-10	29.1	13.0951	0.218983	BAHCC1	BAH domain and coiled-coil containing 1
239599_at	1.84e-08	6.1e-10	29	13.0918	0.295716
206148_at	1.84e-08	6.11e-10	-29	13.0905	-1.09344	IL3RA	interleukin 3 receptor, alpha (low affinity)
1555542_at	1.84e-08	6.11e-10	-29	13.0892	-0.637878	AFAP1L1	actin filament associated protein 1-like 1
1568804_at	1.85e-08	6.13e-10	-29	13.0869	-0.293972
207718_x_at	1.85e-08	6.14e-10	29	13.0843	0.240633	CYP2A7	cytochrome P450, family 2, subfamily A, polypeptide 7
241201_at	1.85e-08	6.15e-10	29	13.0824	0.269643	UVSSA	UV-stimulated scaffold protein A
213825_at	1.85e-08	6.16e-10	-29	13.0811	-0.336151	OLIG2	oligodendrocyte lineage transcription factor 2
240267_at	1.88e-08	6.26e-10	29	13.0639	0.433673
1553071_a_at	1.89e-08	6.28e-10	-28.9	13.06	-0.249468	MYOZ3	myozenin 3
243886_at	1.89e-08	6.28e-10	28.9	13.0596	0.331452
1558552_s_at	1.89e-08	6.29e-10	-28.9	13.0588	-0.520447	C3orf55	chromosome 3 open reading frame 55
209843_s_at	1.89e-08	6.31e-10	-28.9	13.0547	-0.220677	SOX10	SRY (sex determining region Y)-box 10
216838_at	1.9e-08	6.33e-10	-28.9	13.0515	-0.252226	LOC92249	uncharacterized LOC92249
1559679_a_at	1.9e-08	6.35e-10	-28.9	13.0475	-0.309575
207995_s_at	1.91e-08	6.38e-10	28.9	13.0422	0.248802	CLEC4M	C-type lectin domain family 4, member M
214973_x_at	1.91e-08	6.38e-10	28.9	13.0419	0.279694	IGHD	immunoglobulin heavy constant delta
1557335_at	1.91e-08	6.4e-10	-28.9	13.0389	-0.470574
210765_at	1.92e-08	6.43e-10	-28.9	13.0335	-0.309539	CSE1L	CSE1 chromosome segregation 1-like (yeast)
239522_at	1.92e-08	6.44e-10	-28.9	13.0321	-0.349235	IL12RB1	interleukin 12 receptor, beta 1
231493_at	1.93e-08	6.46e-10	28.8	13.0289	0.321214
230062_at	1.93e-08	6.47e-10	-28.8	13.0262	-0.258422	RIMBP3B///RIMBP3C///RIMBP3	RIMS binding protein 3B///RIMS binding protein 3C///RIMS binding protein 3
233619_at	1.94e-08	6.5e-10	-28.8	13.0223	-0.229135
1553196_a_at	1.94e-08	6.51e-10	-28.8	13.0211	-0.337014	FCRL3	Fc receptor-like 3
234846_at	1.95e-08	6.53e-10	-28.8	13.0168	-0.3989
231555_at	1.95e-08	6.55e-10	-28.8	13.014	-0.358349
1565909_at	1.96e-08	6.58e-10	28.8	13.0084	0.280786
214084_x_at	1.96e-08	6.59e-10	-28.8	13.0073	-0.220318	NCF1C	neutrophil cytosolic factor 1C pseudogene
214386_at	1.97e-08	6.62e-10	28.8	13.0018	0.26035
241396_at	1.97e-08	6.64e-10	28.8	12.999	0.924931	NEDD4L	neural precursor cell expressed, developmentally down-regulated 4-like, E3 ubiquitin protein ligase
1570307_s_at	1.98e-08	6.65e-10	28.7	12.9963	0.398659	ST18	suppression of tumorigenicity 18 (breast carcinoma) (zinc finger protein)
233023_at	1.98e-08	6.67e-10	-28.7	12.9938	-0.348729
235208_at	1.99e-08	6.69e-10	-28.7	12.9895	-1.20282	CCDC112	coiled-coil domain containing 112
233467_s_at	1.99e-08	6.71e-10	-28.7	12.9877	-0.211813	TSPAN32	tetraspanin 32
214171_s_at	2e-08	6.74e-10	28.7	12.9819	0.221155	U2AF2	U2 small nuclear RNA auxiliary factor 2
1557528_at	2.02e-08	6.8e-10	28.7	12.9717	0.267799	STRADA	STE20-related kinase adaptor alpha
232132_at	2.03e-08	6.84e-10	-28.7	12.9655	-0.221158	PARD6G	par-6 partitioning defective 6 homolog gamma (C. elegans)
243334_at	2.06e-08	6.96e-10	28.6	12.9465	0.251604	CACNA1D	calcium channel, voltage-dependent, L type, alpha 1D subunit
1564200_at	2.07e-08	6.99e-10	-28.6	12.9419	-0.229018	LINC00607	long intergenic non-protein coding RNA 607
242589_x_at	2.07e-08	6.99e-10	28.6	12.9416	0.246905
213542_at	2.07e-08	7e-10	28.6	12.941	1.70144	ZNF710	zinc finger protein 710
1555468_at	2.08e-08	7.03e-10	-28.6	12.9359	-0.300238	NRP2	neuropilin 2
213968_at	2.08e-08	7.04e-10	28.6	12.9341	0.379539
228898_s_at	2.09e-08	7.1e-10	28.5	12.9249	0.384351	SMARCB1	SWI/SNF related, matrix associated, actin dependent regulator of chromatin, subfamily b, member 1
240488_at	2.09e-08	7.1e-10	-28.5	12.9249	-0.2909
1561710_at	2.11e-08	7.15e-10	28.5	12.9173	0.366991	SNX19	sorting nexin 19
210226_at	2.11e-08	7.16e-10	-28.5	12.9162	-1.59063	NR4A1	nuclear receptor subfamily 4, group A, member 1
1561358_at	2.11e-08	7.18e-10	28.5	12.9133	0.369331	TXLNA	taxilin alpha
244618_at	2.11e-08	7.18e-10	-28.5	12.9131	-0.271079
1559461_at	2.12e-08	7.2e-10	-28.5	12.9092	-0.247715
1555486_a_at	2.12e-08	7.21e-10	-28.5	12.9083	-0.294756	PRR5L	proline rich 5 like
1556471_at	2.12e-08	7.22e-10	-28.5	12.9072	-0.285735	SCML4	sex comb on midleg-like 4 (Drosophila)
211875_x_at	2.12e-08	7.24e-10	-28.5	12.9036	-0.206194	PCDHGA10	protocadherin gamma subfamily A, 10
1570061_at	2.12e-08	7.24e-10	-28.5	12.903	-1.10289
241346_at	2.12e-08	7.25e-10	-28.5	12.9022	-0.693652	ARHGAP30	Rho GTPase activating protein 30
1563509_at	2.12e-08	7.25e-10	28.5	12.9017	0.353098
232640_at	2.13e-08	7.27e-10	-28.5	12.8996	-0.241749	COMMD5	COMM domain containing 5
227967_at	2.14e-08	7.3e-10	28.4	12.8937	0.835081	TUBGCP5	tubulin, gamma complex associated protein 5
217603_at	2.14e-08	7.32e-10	28.4	12.8916	0.328842	ATP6V0A2	ATPase, H+ transporting, lysosomal V0 subunit a2
230877_at	2.14e-08	7.32e-10	28.4	12.8914	0.248186	IGHD	immunoglobulin heavy constant delta
220438_at	2.15e-08	7.34e-10	-28.4	12.8882	-0.234417	QPCTL	glutaminyl-peptide cyclotransferase-like
214408_s_at	2.15e-08	7.36e-10	-28.4	12.8853	-0.242488	RFPL1S///RFPL3S	RFPL1 antisense RNA 1///RFPL3 antisense
223848_at	2.16e-08	7.41e-10	-28.4	12.8772	-0.423801	LOC100129198	PRO2866
243261_at	2.17e-08	7.42e-10	28.4	12.876	0.234168	LINC00689	long intergenic non-protein coding RNA 689
231343_at	2.17e-08	7.44e-10	28.4	12.8734	0.724941
240566_at	2.18e-08	7.47e-10	-28.4	12.8695	-0.359105
240202_x_at	2.18e-08	7.49e-10	28.4	12.8662	0.474388	PFKP	phosphofructokinase, platelet
232743_at	2.2e-08	7.55e-10	28.3	12.8573	0.306306
215876_at	2.2e-08	7.57e-10	-28.3	12.8548	-0.273243
32062_at	2.21e-08	7.59e-10	-28.3	12.852	-0.365026	LRRC14	leucine rich repeat containing 14
1557325_at	2.21e-08	7.59e-10	-28.3	12.8518	-0.287317
214541_s_at	2.21e-08	7.6e-10	28.3	12.8507	0.323214	QKI	QKI, KH domain containing, RNA binding
203457_at	2.22e-08	7.63e-10	28.3	12.8452	0.318678	STX7	syntaxin 7
239571_at	2.22e-08	7.63e-10	28.3	12.8451	0.271496
216475_at	2.23e-08	7.7e-10	28.3	12.8352	0.285219
233330_s_at	2.23e-08	7.71e-10	-28.3	12.8349	-0.26504
233368_s_at	2.24e-08	7.73e-10	-28.3	12.8311	-0.313779	DNAJC27	DnaJ (Hsp40) homolog, subfamily C, member 27
222776_at	2.25e-08	7.77e-10	-28.2	12.8259	-0.302783	MAGOHB	mago-nashi homolog B (Drosophila)
1555035_a_at	2.25e-08	7.78e-10	-28.2	12.8243	-0.235777	CLRN1	clarin 1
231310_at	2.26e-08	7.83e-10	28.2	12.817	0.410424
1562729_at	2.26e-08	7.84e-10	-28.2	12.8165	-0.243804
203807_x_at	2.26e-08	7.84e-10	28.2	12.8165	0.265737	CSH2	chorionic somatomammotropin hormone 2
208020_s_at	2.27e-08	7.86e-10	28.2	12.8138	0.336811	CACNA1C	calcium channel, voltage-dependent, L type, alpha 1C subunit
230916_at	2.27e-08	7.86e-10	-28.2	12.8127	-0.676383	NODAL	nodal growth differentiation factor
208320_at	2.27e-08	7.87e-10	-28.2	12.8118	-0.256305	CABP1	calcium binding protein 1
231400_s_at	2.28e-08	7.9e-10	28.2	12.808	0.224852	TIMM22	translocase of inner mitochondrial membrane 22 homolog (yeast)
211224_s_at	2.28e-08	7.9e-10	28.2	12.8072	0.281452	ABCB11	ATP-binding cassette, sub-family B (MDR/TAP), member 11
36907_at	2.28e-08	7.91e-10	28.2	12.8056	0.515659	MVK	mevalonate kinase
228862_at	2.28e-08	7.93e-10	28.2	12.8031	0.328121	TSNARE1	t-SNARE domain containing 1
232857_at	2.29e-08	7.95e-10	28.2	12.8007	0.380504	POLR3H	polymerase (RNA) III (DNA directed) polypeptide H (22.9kD)
1553518_at	2.29e-08	7.97e-10	28.2	12.7981	0.232582	DEFT1P2///DEFT1P	defensin, theta 1 pseudogene 2///defensin, theta 1 pseudogene
1559975_at	2.3e-08	7.99e-10	-28.1	12.7955	-0.292937	BTG1	B-cell translocation gene 1, anti-proliferative
215753_at	2.3e-08	8.01e-10	28.1	12.7927	0.277233
1553452_at	2.3e-08	8.03e-10	28.1	12.7901	0.26125	MYO1H	myosin IH
210204_s_at	2.31e-08	8.05e-10	-28.1	12.7874	-0.614543	CNOT4	CCR4-NOT transcription complex, subunit 4
211155_s_at	2.31e-08	8.06e-10	-28.1	12.7854	-0.89642	THPO	thrombopoietin
1565814_at	2.32e-08	8.09e-10	28.1	12.7807	0.216886	TRIM36	tripartite motif containing 36
234306_s_at	2.32e-08	8.1e-10	28.1	12.7804	0.259241	SLAMF7	SLAM family member 7
217214_s_at	2.32e-08	8.12e-10	-28.1	12.7777	-0.394468	SLC6A2	solute carrier family 6 (neurotransmitter transporter, noradrenalin), member 2
1566201_at	2.33e-08	8.13e-10	28.1	12.7754	0.383981
1561905_at	2.33e-08	8.15e-10	-28.1	12.7737	-0.677181
1552322_at	2.34e-08	8.18e-10	-28.1	12.7692	-0.283657	FAM122C	family with sequence similarity 122C
239595_at	2.34e-08	8.18e-10	-28.1	12.7688	-0.236881	GPX2	glutathione peroxidase 2 (gastrointestinal)
1556422_at	2.36e-08	8.27e-10	-28	12.7575	-0.234912
241566_at	2.37e-08	8.32e-10	-28	12.7511	-0.410444
223777_at	2.38e-08	8.35e-10	28	12.7461	0.824905	DDX11L2	DEAD/H (Asp-Glu-Ala-Asp/His) box helicase 11 like 2
206908_s_at	2.4e-08	8.4e-10	28	12.7395	0.220597	CLDN11	claudin 11
1561370_at	2.4e-08	8.41e-10	28	12.7381	0.238615	LOC100505716	uncharacterized LOC100505716
234447_at	2.4e-08	8.43e-10	28	12.7365	0.266585
1567060_at	2.41e-08	8.47e-10	28	12.7313	0.341663	OR8G1	olfactory receptor, family 8, subfamily G, member 1
230840_at	2.41e-08	8.47e-10	-28	12.7307	-0.280916	SMIM1	small integral membrane protein 1
233490_at	2.41e-08	8.47e-10	-28	12.7305	-0.340028	DCTN4	dynactin 4 (p62)
216498_at	2.42e-08	8.51e-10	-27.9	12.7263	-0.452524
1554379_a_at	2.44e-08	8.57e-10	27.9	12.7176	0.203407	TP73	tumor protein p73
230065_at	2.44e-08	8.59e-10	27.9	12.7157	0.698139	ZNF180	zinc finger protein 180
216317_x_at	2.44e-08	8.6e-10	-27.9	12.7142	-0.377861	RHCE	Rh blood group, CcEe antigens
232393_at	2.45e-08	8.63e-10	27.9	12.7098	0.290504	ZNF462	zinc finger protein 462
236804_at	2.47e-08	8.71e-10	27.9	12.6997	1.13681
214338_at	2.48e-08	8.74e-10	27.9	12.6964	0.899231	DNAJB12	DnaJ (Hsp40) homolog, subfamily B, member 12
222114_x_at	2.48e-08	8.76e-10	27.8	12.6942	1.1147	WDR55	WD repeat domain 55
205879_x_at	2.49e-08	8.78e-10	-27.8	12.6909	-0.21084	RET	ret proto-oncogene
236383_at	2.5e-08	8.83e-10	-27.8	12.6847	-0.526266
232492_at	2.5e-08	8.84e-10	27.8	12.6842	0.243896	BVES-AS1	BVES antisense RNA 1
239676_x_at	2.5e-08	8.85e-10	-27.8	12.683	-0.252566	LOC100510500///FBRSL1	hypothetical protein LOC100510500///fibrosin-like 1
1562351_at	2.5e-08	8.85e-10	27.8	12.6828	0.32083
216029_at	2.51e-08	8.9e-10	27.8	12.6766	0.256828
237325_at	2.52e-08	8.92e-10	-27.8	12.6738	-0.272889	C22orf43	chromosome 22 open reading frame 43
1566086_at	2.52e-08	8.93e-10	27.8	12.6728	0.331543
236737_at	2.52e-08	8.94e-10	27.8	12.6712	0.212362	ENTHD2	ENTH domain containing 2
223900_s_at	2.53e-08	8.97e-10	-27.8	12.6675	-0.321075	SMIM4	small integral membrane protein 4
219519_s_at	2.53e-08	8.98e-10	-27.8	12.6664	-0.278236	SIGLEC1	sialic acid binding Ig-like lectin 1, sialoadhesin
217517_x_at	2.53e-08	9e-10	27.8	12.6638	0.625707	SRPK2	SRSF protein kinase 2
232430_at	2.53e-08	9.01e-10	27.8	12.6634	0.28757	LOC148696	uncharacterized LOC148696
1562664_at	2.54e-08	9.03e-10	-27.7	12.661	-0.308306	LOC286009	uncharacterized LOC286009
223870_at	2.56e-08	9.1e-10	-27.7	12.6514	-0.241216	FBXW10	F-box and WD repeat domain containing 10
201884_at	2.56e-08	9.12e-10	-27.7	12.6495	-0.303428	CEACAM5	carcinoembryonic antigen-related cell adhesion molecule 5
240934_at	2.57e-08	9.14e-10	27.7	12.6468	0.200398
1560537_at	2.57e-08	9.15e-10	-27.7	12.6464	-0.471454	FGF13-AS1	FGF13 antisense RNA 1
214195_at	2.57e-08	9.16e-10	-27.7	12.6447	-1.24067	TPP1	tripeptidyl peptidase I
230215_at	2.57e-08	9.16e-10	-27.7	12.6447	-0.226086	SEC61A2	Sec61 alpha 2 subunit (S. cerevisiae)
1568616_a_at	2.57e-08	9.16e-10	-27.7	12.6445	-0.70599	C11orf96	chromosome 11 open reading frame 96
1556768_at	2.57e-08	9.18e-10	27.7	12.6427	0.893532	LINC00930	long intergenic non-protein coding RNA 930
240856_at	2.57e-08	9.19e-10	27.7	12.6411	0.344275	FFAR4	free fatty acid receptor 4
235430_at	2.57e-08	9.2e-10	27.7	12.6397	0.362727	ELMSAN1	ELM2 and Myb/SANT-like domain containing 1
210527_x_at	2.57e-08	9.21e-10	27.7	12.639	1.15587	TUBA3C	tubulin, alpha 3c
209415_at	2.6e-08	9.31e-10	27.6	12.6273	0.390095	FZR1	fizzy/cell division cycle 20 related 1 (Drosophila)
233679_at	2.6e-08	9.32e-10	27.6	12.6257	0.337367	TAB1	TGF-beta activated kinase 1/MAP3K7 binding protein 1
1557632_at	2.6e-08	9.32e-10	-27.6	12.6252	-0.786682
233029_at	2.63e-08	9.42e-10	-27.6	12.6144	-0.245285	OBSCN	obscurin, cytoskeletal calmodulin and titin-interacting RhoGEF
208006_at	2.63e-08	9.42e-10	-27.6	12.6136	-0.240161	FOXI1	forkhead box I1
216270_at	2.63e-08	9.45e-10	27.6	12.6106	0.252714	ILVBL	ilvB (bacterial acetolactate synthase)-like
221379_at	2.64e-08	9.47e-10	27.6	12.6083	0.272616
1569008_at	2.64e-08	9.49e-10	-27.6	12.6061	-0.226689	LOC100132249	uncharacterized LOC100132249
238261_at	2.65e-08	9.53e-10	-27.6	12.6017	-0.259063
234046_at	2.68e-08	9.64e-10	27.5	12.589	0.401551
233165_at	2.68e-08	9.64e-10	27.5	12.5884	0.234102	NCKIPSD	NCK interacting protein with SH3 domain
1555236_a_at	2.68e-08	9.65e-10	27.5	12.5871	0.220631	PGC	progastricsin (pepsinogen C)
205869_at	2.68e-08	9.66e-10	-27.5	12.5865	-0.269453	PRSS1	protease, serine, 1 (trypsin 1)
243072_at	2.69e-08	9.68e-10	-27.5	12.5842	-0.359152
205957_at	2.69e-08	9.69e-10	-27.5	12.5833	-0.344584	PLXNB3	plexin B3
239117_at	2.7e-08	9.74e-10	27.5	12.5766	0.221322
244497_at	2.71e-08	9.76e-10	-27.5	12.5748	-0.25361	LOC100129907	hypothetical LOC100129907
1568813_at	2.71e-08	9.78e-10	27.5	12.5729	1.00347	LOC100506392	uncharacterized LOC100506392
1555749_at	2.72e-08	9.82e-10	-27.5	12.5681	-0.434692	SF1	splicing factor 1
205845_at	2.72e-08	9.83e-10	-27.5	12.5676	-0.237176	CACNA1H	calcium channel, voltage-dependent, T type, alpha 1H subunit
231719_at	2.72e-08	9.83e-10	-27.5	12.5667	-0.543511	TOR1AIP2	torsin A interacting protein 2
202186_x_at	2.74e-08	9.9e-10	-27.4	12.5589	-0.438918	PPP2R5A	protein phosphatase 2, regulatory subunit B', alpha
228800_x_at	2.76e-08	9.97e-10	-27.4	12.5512	-1.14053	AURKAIP1	aurora kinase A interacting protein 1
238366_at	2.77e-08	1e-09	27.4	12.5463	0.238259	C1orf228	chromosome 1 open reading frame 228
1562733_at	2.77e-08	1e-09	-27.4	12.5453	-1.30975	LINC00092	long intergenic non-protein coding RNA 92
210123_s_at	2.77e-08	1.01e-09	-27.4	12.5423	-0.219667	CHRFAM7A///CHRNA7	CHRNA7 (cholinergic receptor, nicotinic, alpha 7, exons 5-10) and FAM7A (family with sequence similarity 7A, exons A-E) fusion///cholinergic receptor, nicotinic, alpha 7 (neuronal)
1568902_at	2.78e-08	1.01e-09	-27.4	12.5415	-0.275796
205056_s_at	2.78e-08	1.01e-09	-27.4	12.5393	-1.59392	GPR162	G protein-coupled receptor 162
1553340_s_at	2.78e-08	1.01e-09	27.4	12.539	0.204707	SLC35G4///SLC35G3///SLC35G5	solute carrier family 35, member G4///solute carrier family 35, member G3///solute carrier family 35, member G5
211322_s_at	2.78e-08	1.01e-09	27.4	12.5367	0.309787	SARDH	sarcosine dehydrogenase
243698_at	2.78e-08	1.01e-09	27.4	12.5359	0.862519
220466_at	2.79e-08	1.01e-09	27.4	12.5331	0.237284	CCDC15	coiled-coil domain containing 15
239458_at	2.79e-08	1.02e-09	27.4	12.5311	0.308191	ALS2CR12	amyotrophic lateral sclerosis 2 (juvenile) chromosome region, candidate 12
233033_at	2.81e-08	1.02e-09	27.4	12.5253	0.3948	ZEB2	zinc finger E-box binding homeobox 2
1556265_at	2.81e-08	1.02e-09	27.3	12.525	0.899412	C20orf202	chromosome 20 open reading frame 202
232695_at	2.81e-08	1.02e-09	27.3	12.5229	0.450594	KIF6	kinesin family member 6
211619_s_at	2.81e-08	1.03e-09	-27.3	12.5207	-0.272508	ALPPL2///ALPP	alkaline phosphatase, placental-like 2///alkaline phosphatase, placental
216949_s_at	2.82e-08	1.03e-09	27.3	12.5192	0.503594	PKD1	polycystic kidney disease 1 (autosomal dominant)
1553157_at	2.83e-08	1.03e-09	-27.3	12.5124	-0.309546	LHX4	LIM homeobox 4
232093_at	2.83e-08	1.03e-09	27.3	12.5118	0.423966	LINC00085	long intergenic non-protein coding RNA 85
241308_at	2.84e-08	1.04e-09	27.3	12.5097	0.52785
218530_at	2.84e-08	1.04e-09	-27.3	12.5066	-0.348976	FHOD1	formin homology 2 domain containing 1
229913_at	2.84e-08	1.04e-09	27.3	12.5055	0.244159	C7orf61	chromosome 7 open reading frame 61
1563079_at	2.84e-08	1.04e-09	27.3	12.505	0.204507	LOC100289090	uncharacterized LOC100289090
[truncated: 52,676 more rows]

## Sheet: GSE91077 - DSC
ID	adj.P.Val	P.Value	t	B	logFC	SPOT_ID	GB_ACC	SEQUENCE
A_24_P124349	0.00692	2.03e-07	-12.6373	6.29539	-1.55365	A_24_P124349	NM_025208	ACTCTAACCTGAACAGCTCACAATGTAGCTGTAAATATAAAAAATGAGAGTGTTCTACCC
A_24_P226970	0.02057	1.44e-06	-10.2168	5.01987	-1.93072	A_24_P226970	NM_014951	GCTTTTTTGAAGAAATCACCAAAGTTTCTGGGAAACTATGTTCAAGGTTGAAATGGAGAG
A_23_P138706	0.02057	2.13e-06	-9.78749	4.74376	-3.47404	A_23_P138706	NM_000681	ATCATGTCATTGATGAACTGCCAAAGTCAGGGGAGGAGGGCAGAGACTTTGTGTTTACAT
A_24_P185854	0.02057	2.41e-06	-9.65285	4.65354	-2.30547	A_24_P185854	NM_004010	GCCTTACTATTGTATTATAGTACTGCTTTACTGTGTATCTCAATAAAGCACGCAGTTATG
A_23_P118065	0.02409	3.53e-06	-9.25154	4.37377	-3.97923	A_23_P118065	NM_002153	AGGGAAAGGCGCTTACTTGTGGATCTGCCTTGCTCACTATTTGCCTATTGGCATATATGA
A_24_P330263	0.02726	4.79e-06	8.93929	4.14435	1.77304	A_24_P330263	NM_003991	GTAAACCAAAACCCAACAATGTGGCCAGAAAGAAAGAGCAATAATAATTAATTCACACAC
A_32_P190769	0.04592	9.42e-06	-8.27943	3.62312	-2.77668	A_32_P190769	NM_031911	CATACTTTGTGCACTTATTGCTCTCCTTCTGAGTCAGGACATGTGTACAGGAGACCAAGA
A_33_P3381245	0.04896	1.15e-05	8.09373	3.46697	0.696288	A_33_P3381245	NM_004708	CAGACTAGAACTTAACGGAACAAGTCTAGGACAGAAGTTAAGATCTGATTATTTACTTTG
A_33_P3419785	0.05927	1.76e-05	7.70068	3.12184	1.09587	A_33_P3419785	NM_004052	GGCCACGTCACTTGTGTTTATTTGTTCTGTAAATGCTGCGTTCCTAATTTAGTAAAATAA
A_33_P3242508	0.05927	1.84e-05	-7.66334	3.08798	-1.27635	A_33_P3242508	NM_199450	TTATTGAGAATCTGTTACAGCGGGTAGAACTGGCGGAGAAGCAGCTTGAGTACTATCAGA
A_23_P207456	0.05927	1.91e-05	7.6295	3.05714	2.76875	A_23_P207456	NM_005623	GTTTTAACTCTATCTGTCATACATCCTAGTGAATGTAAAATGCAAAATCCTGGTGATGTG
A_33_P3284763	0.06076	2.19e-05	-7.5088	2.94586	-1.50154	A_33_P3284763	NM_004021	ACAAGCACAGGGTTAGAGGAGGTGATGGAGCAACTCAACAACTCCTTCCCTAGTTCAAGA
A_24_P335620	0.06076	2.38e-05	7.43639	2.87813	1.29081	A_24_P335620	NM_003486	TTTCAGTCGTTGTGCTTTTTTGTTTTGTGCTAACGTCTTACTAATTTAAAGATGCTGTCG
A_32_P4018	0.06076	2.49e-05	-7.39521	2.83929	-1.28238	A_32_P4018	AK000776	TTCAGATCTTTTTCTCCTTTTTTGCACAAAACTATGCTTATGGTTTGTGTCACAGAAGTG
A_33_P3263061	0.06336	3.17e-05	-7.18831	2.64047	-0.999281	A_33_P3263061	NM_016282	TGCTGCCTGATGTCTCAATGGCTTCTGAATGACTGTTCTAATAAATGATCTTAAAACAGT
A_24_P350200	0.06336	3.43e-05	7.12096	2.57442	0.629208	A_24_P350200	AK057071	AAGGCCACCACACACCACCTGTCCAGAAAGGCCTTCGATACGGGATAATCCTATTTATTA
A_23_P415706	0.06336	3.49e-05	7.10541	2.55908	3.12913	A_23_P415706	NM_198827	GAACTATCTTTAGTTTAGATGGAATTATTTGTTTTTAATTGTTGCCGTATTCATCTATAT
A_24_P410952	0.06336	3.76e-05	7.04274	2.49688	0.896818	A_24_P410952	NM_003768	AACCTAGGGAGGTTGAAGAATGAGACCCTTAGGTTTTAACACGAATCCTGACACCACCAT
A_24_P192727	0.06336	3.77e-05	-7.04164	2.49578	-1.97478	A_24_P192727	AK172864	AAGAGGCGACATCTCTGGCAAGTTGGGAGTACAGGAAGTAGCGAAGGAGTGCCATCTGGT
A_23_P202117	0.06336	4.16e-05	6.95771	2.41156	0.721442	A_23_P202117	BC007377	GTTGACCTCAGGATACATTAAAGCTACTTAGTGGTGACTGGTTTCTGCCTACCACTTCCT
A_23_P58337	0.06336	4.17e-05	-6.95606	2.40989	-0.842391	A_23_P58337	NM_030917	CGAAGCTACACCTGCAGAATAGGCATGGTTTTGGCCTTTTGTGTATATTAGTACCAGAAG
A_23_P45999	0.06336	4.47e-05	-6.89861	2.35163	-2.85924	A_23_P45999	NM_012168	GCCCCTGAGCAGGGAGAGAGAAGTTTTGTTGGCATAGGTTTGCTTAGGTAGCCGGCTTCT
A_33_P3326225	0.06336	4.67e-05	-6.86277	2.31502	-1.03622	A_33_P3326225	NM_001101676	CATTACTTGACTCCTTATGTGCATGGCAATGTATTAAAATGTGGGATTTCTATTACCGTG
A_23_P94517	0.06336	4.88e-05	-6.82669	2.27797	-2.90419	A_23_P94517	NM_014618	GGAAATGAAAACGTTCTAGCAACTGTATAAAAGCGTTGGGCATGTTTGTTATTTCTATAC
A_24_P355944	0.06336	4.94e-05	6.81683	2.26781	1.03354	A_24_P355944	NM_004093	TGCGTCTGTTTTGTGTCTGGTGCAGAATATGACAATCTACCAACTGTCCCTTTGTTTGAA
A_23_P27724	0.06336	4.96e-05	-6.81321	2.26408	-1.08686	A_23_P27724	NM_003009	CCTCAGGCATCCTTCTCAAGGGGAAGCCAAGAGAGGCATCAGGATGGGTGGGTTTCTGAT
A_33_P3250963	0.06336	5.09e-05	-6.79101	2.24114	-1.40595	A_33_P3250963	NR_015381	TTCCTGCATGATGCTGGGGAGCTTGGCGCCTGACCCAGGATCTAGAAGGCACTCTGGGCA
A_33_P3304655	0.06336	5.51e-05	6.72674	2.17431	1.66935	A_33_P3304655	NM_206943	AACTGATGTCTACCAAGATTTGTGCTGGGAACATCTGAGTGATGAATACGTGTGTAGCCG
A_32_P135348	0.06336	5.98e-05	-6.66034	2.10459	-0.995608	A_32_P135348	NM_033394	AAATAGGAACCTCTGATGTCATTCTTCAACGTTTGTTCCTGTGTGTACAATTGTACTTTG
A_23_P255331	0.06336	6.23e-05	-6.62671	2.06902	-2.52437	A_23_P255331	NM_032623	TTTCAGCAACAAATGCCATAGGGTGTCTGATAAGTGCTTTGGTGTTTTTAGTACACTTAG
A_23_P171143	0.06336	6.35e-05	-6.61204	2.05346	-1.39743	A_23_P171143	NM_003270	ATCCACGACTGGAAGGGACTACTGATGTTCTGTGATACATCAGGTTTCAGCACACAACTT
A_33_P3266674	0.06336	6.59e-05	-6.58183	2.02128	-1.12195	A_33_P3266674	NM_025224	AGGTGAGCACGTCCATCTCAGGAGGCGTGGAGGGAAAAGACATGTCATGAAGGGTTTTTT
A_23_P12082	0.06336	6.59e-05	6.58183	2.02128	1.90137	A_23_P12082	NM_001025199	ATGATGTGAAGAGTATGGAGACCAAGGTTCAGTTCTTAAAGAATTTAAACCTGGGAGGAG
A_23_P60079	0.06336	7.25e-05	-6.50574	1.93962	-3.80863	A_23_P60079	NM_001147	CAGTTTACAGACGCTGCTGTCACAACCAAGAATGTTATGTGCAAGTTTATCAGTAAATAA
A_23_P348298	0.06336	7.42e-05	-6.48751	1.91992	-0.703757	A_23_P348298	NM_013299	GTACGTGCAAGGTGTTAGTGGAGAGCAAACTTCGAGGACGTACCCTGGAGGAGGTGGTCA
A_24_P107859	0.06336	7.66e-05	-6.46186	1.89211	-0.675019	A_24_P107859	NM_152594	TACTGTTTATATATTTGAATGCTGCTACAACAGATGATCTTCATCCCTGAAGTTTTCAGC
A_24_P339611	0.06336	7.69e-05	6.45892	1.88891	0.915064	A_24_P339611	NM_004708	ACCTTATACAGATGGCAAGATATGGACAACTAAGTGAGAAGGTATCAGAACAAGGTTTAA
A_23_P422212	0.06336	7.76e-05	-6.45177	1.88114	-2.24152	A_23_P422212	NM_173508	TGTAACCATGGAGTCTTCTGTTTCCTGGGGGAAAGGGGCATTCATGACCTGAACTTTTTA
A_23_P78122	0.06336	7.82e-05	-6.44494	1.8737	-1.08616	A_23_P78122	NM_078471	TTGGGGTTGAGGACTTGTGATCAGAAAAACTGAAGATGGAAGTTTTGGCCGGTGCTCATT
A_23_P125596	0.06336	8.08e-05	-6.41979	1.84627	-0.686237	A_23_P125596	NM_014496	GAGCATGAAAAAGCGAACATCAACTGGCCTGTAAGATTTGTGGTGTTCCTAGGCCAAACT
A_24_P297551	0.06336	8.49e-05	-6.38064	1.80336	-1.70562	A_24_P297551	NM_178539	TCTATTAGTTTGTGACAATATTCAAAGGCCAAAACACTACTCAGACACTTTCCTGGGAAG
A_32_P80850	0.06336	8.66e-05	-6.36508	1.78624	-1.75052	A_32_P80850	NM_021110	GTTCCTGGACCCCAAGGTCCTTCTGGCCAGCCTGGATATTGTGACCCCTCATCATGTTCT
A_33_P3221448	0.06336	8.66e-05	-6.36486	1.786	-0.897744	A_33_P3221448	NM_003417	CTAGTTCATGGCTTCAGTGGGGGAGAGATTTAAATAATATGGGTTTATAATTTCTGCATT
A_24_P269062	0.06336	8.81e-05	-6.35137	1.77112	-1.39831	A_24_P269062	NM_030964	TCGCCATCATACCTCGAGTGAGGCCCAGCTAGATAATGACTTGTCCAAGATGGCACACGT
A_23_P11331	0.06336	8.82e-05	-6.35011	1.76973	-0.743738	A_23_P11331	NM_153333	AATAATTTGCAACCAGCTTATGAGGGCAATGGGGGCACCTAAACTCTTGATGAAAGAACT
A_23_P3221	0.06336	9.04e-05	6.3309	1.7485	1.41275	A_23_P3221	NM_021199	TCCCTTTTCAGTACCTTTGAACAGCAACCATGTGGGCTACTCATGATGGGCTTGATTCTT
A_24_P336853	0.06336	9.05e-05	6.3301	1.74761	0.682439	A_24_P336853	NM_020143	GATTATCTCAGAAAAACCTCTCTGAATGATGACCCTTCCTTAATACTGGGTGATGTGTGA
A_23_P30275	0.06336	9.32e-05	-6.30708	1.72207	-1.55531	A_23_P30275	NM_024028	ATATCTTACCCCTAGATGTTCATCCCAGCAGAAGAAAGAAGAAGGTGTTGGGGTAGGATT
A_23_P2884	0.06336	9.44e-05	6.29714	1.71102	1.1359	A_23_P2884	NM_004569	AGTCCTAGGAACCATTATGGATGTAGTGCATCTTAGAGCCATAGAGCAGGTGACTGGAAA
A_33_P3231953	0.06336	9.59e-05	-6.28523	1.69776	-3.72686	A_33_P3231953	NM_004370	GCGAGGTGCAAACTGTTACATTTGACACAGAAGAAGTAAAGACATTATTTTATGGAAGTT
A_33_P3411991	0.06336	9.64e-05	-6.28134	1.69342	-0.538861	A_33_P3411991	NM_012197	CCTAATGAAAGATTATTCTGGCCCTTCAGCAAACGTAGTACTACTGAAAATTTCTTTTTG
A_23_P24157	0.06336	9.74e-05	-6.27284	1.68394	-1.3885	A_23_P24157	NM_032709	TTGGAGAGAATCTTCGGGCTTCCTGGAGGGAACATATTCCACTGCGCCATGTCCCTGGAC
A_24_P48162	0.06336	9.84e-05	-6.26497	1.67515	-0.645885	A_24_P48162	NM_002434	TTCATGAAGCCGGGGACCCTGTACGTGTACATCATTTACGGCATGTACTTCTGCATGAAC
A_33_P3280801	0.06353	0.000101	-6.24834	1.65654	-1.67463	A_33_P3280801	NM_005358	GCTGAAGTCAGGATCAGAAACCACCAACTGTACTGCAACGACTGCTATCTCAGATTCAAA
A_23_P163209	0.06394	0.000103	-6.22918	1.63504	-0.846198	A_23_P163209	NM_020396	GCATACAAGGAGTCCTGAGGTGGTGATTTGGCCAGTGTTTTAACTTGTGACAAGTACTCA
A_23_P79251	0.06499	0.000107	-6.20254	1.60505	-2.02484	A_23_P79251	NM_014600	CTCACACACTTGTCTGTGCTATGATGTATGCAGGATCCCAGCATTGATACCCAATGACAA
A_23_P360079	0.06505	0.000109	-6.18822	1.58888	-3.22134	A_23_P360079	NM_207363	AATAGTGACAGTGACCTGGACTATGGAGATAATGGTTTTGGAGCTGGAAGGGGACAGTTA
A_23_P207014	0.06906	0.000119	-6.11939	1.51069	-0.753949	A_23_P207014	NM_002876	GCTTCATAATCACCTTCTGTTCAGCACTAGATGATATTCTTGGGGGTGGAGTGCCCTTAA
A_23_P166536	0.06906	0.000121	-6.10692	1.49645	-0.640853	A_23_P166536	NM_014577	TTTTATTTTTAAGAGGTAAAGCATTATGTTGGGGAAAGTAGGGTGGGTTTCCAAATTTGC
A_33_P3261610	0.06906	0.000124	-6.0847	1.471	-0.584923	A_33_P3261610	NM_032305	TTTCTTCAGACAAGCAAATCATTTGGTCAGAGTTCATATAATCTGTCTGTTCCCTGGAGA
A_24_P392022	0.06906	0.000127	6.07039	1.45457	0.776418	A_24_P392022	NM_201400	ACGGGATTGTTAGAATCAAATCACTCTCGTGGGAAGAATTTTTATATGGGAAAGCGGATA
A_23_P317082	0.06906	0.000131	-6.04608	1.42657	-0.872305	A_23_P317082	NM_138780	AGAGTGTTAACCCTCAGTGGAATCATACATTCATGTTCAGTGGCATCCATCCCCAGGATA
A_33_P3246883	0.06906	0.000132	6.03998	1.41953	1.2661	A_33_P3246883	NM_033317	CAACCAGCATGCGTATCCCACTGCCTATGGTGGGAAGTACTCAGTCAAGACCCCTGCAAA
A_24_P109652	0.06906	0.000132	-6.03804	1.41728	-1.27171	A_24_P109652	NM_024776	GAGCTTCACCCCTCTACTTACATATTGTAAAGTTGTATAAATCTATCATTGAAAGGTCCT
A_32_P195401	0.06906	0.000133	-6.03115	1.40933	-1.22445	A_32_P195401	NM_173511	TCGGTATTGTTACGCTGTACTTATGTATTCCCTGTACCTGAACACTTGTTGCTGCCTCAC
A_23_P51187	0.06906	0.000135	-6.0239	1.40094	-1.80081	A_23_P51187	NM_002744	TGCCGAGGGGGCTGTCATGCGGTTTCCAAGGTGCACATTTTCCACGGAAACAGAACTCGA
A_33_P3269740	0.06906	0.000136	6.01623	1.39206	0.798696	A_33_P3269740	NM_001137610	ACACATGACTCCAAAGGGATTGTGAGAATCAAGTCACTCTCGTGGGAAGAATTTTTATAT
A_33_P3246885	0.06906	0.000138	6.00744	1.38187	0.718658	A_33_P3246885	NM_001190348	TTAAAACACCACCCTCTCATCACTAATCTCAGCCCTTGCCCTTGAAATAAACCTTAGCTG
A_23_P130333	0.07003	0.000142	-5.98191	1.3522	-2.04608	A_23_P130333	NM_000371	GTTTTCACCTCATATGCTATGTTAGAAGTCCAGGCAGAGACAATAAAACATTCCTGTGAA
A_23_P320261	0.07003	0.000144	5.97504	1.3442	1.91846	A_23_P320261	NM_001035516	AGTTCTCCAGGAAGGAGGAGCTTCCTACTTTTGAGTTTCTCTGTGGAAATAAAACATGAA
A_23_P63232	0.07016	0.000146	-5.96287	1.33	-0.57988	A_23_P63232	NM_130898	ACCCCAAGAGATGTCCTTTAGTCTCTGCCTGAGGCCTAGTCTGCATTTGTTTGCATATAT
A_33_P3261293	0.07432	0.000158	-5.90477	1.2619	-1.76088	A_33_P3261293	NM_015881	TGTATGTGTGCAAGCCGACCTTCGTGGGGAGCCGTGACCAAGATGGGGAGATCCTGCTGC
A_33_P3316539	0.07432	0.000159	5.89865	1.25468	2.82479	A_33_P3316539	NM_001008539	ATTCTATGTCTGTAAAAACCAACAAAGGCATTGGACTTGTGTGAATGTACAGGGTTTTTT
A_23_P45345	0.07494	0.000164	-5.87578	1.2277	-0.489723	A_23_P45345	NM_014500	GCCTGTGCTTCAGGGTAATTACTAGTAGTGTTACATGAACATGTGCATAGTGGTAGGATG
A_24_P113815	0.07494	0.000165	-5.87229	1.22357	-1.80459	A_24_P113815	NM_182838	CTGTTTGTGGGTCTGATGAGGTTTGCAACTGTGGTTTTGGGTTTGGTCAGCCTGAAAAAT
A_23_P78782	0.07667	0.000171	-5.84237	1.18811	-1.33815	A_23_P78782	NM_001217	TCCTTAACCGCGACACCATCACTCGCATCTCCTACAAGAATGATGCCTACTTTCTTCAAG
A_33_P3268910	0.07667	0.000173	-5.83562	1.1801	-2.26027	A_33_P3268910		AAGGGACGACGCCCGCCTTTCTCTCTCCGAGAAGGATCCCCAAACCTCACTCTCTTCACT
A_24_P250535	0.07936	0.000183	5.79447	1.13103	0.643515	A_24_P250535	NM_021156	GTGTTTGTTCATTCTGACCTAAGGGGTTTAGATAATCAGTAACCATAACCCCTGAAGCTG
A_24_P332926	0.07936	0.000187	-5.77757	1.11081	-0.712643	A_24_P332926	NM_014884	GTGTGTCTCATCCAGGAGCCAAAAGTCCATGAACCAGTTCGAATTGCCTATGACAGGCCT
A_23_P168443	0.07936	0.000188	-5.7743	1.10688	-0.933809	A_23_P168443	NM_004444	AGATCTCTGCTGAGGACCTGCTCCGAATCGGAGTCACTCTGGCGGGACACCAGAAGAAAA
A_23_P207399	0.07936	0.000188	-5.77242	1.10463	-0.642009	A_23_P207399	NM_031858	AGAGCTTGTCCATGAACCCAGGTTCTCACTCTGTTTACAGAAGTGTGTTGAGTACAGTTG
A_23_P131626	0.08099	0.000195	-5.74827	1.07561	-0.505551	A_23_P131626	NM_014014	CTTTTGGGTAAAGGAGAGTTGAGCCTGAATTAGGAATGTGTACATTGTAGGAATCCTGGT
A_23_P70231	0.08451	0.000216	-5.67149	0.98272	-0.970501	A_23_P70231	NM_001182	GGAGTCTGGCAGTGATGCCTGGAAACAGTACATGAGAAGGTCTACTTGTACTATCAACTA
A_33_P3317392	0.08451	0.000219	-5.66083	0.96974	-2.01518	A_33_P3317392	NM_133638	AGACAATCCAATGTATGTTCTGAGGTCACCTGGCTCTCTTCATGTCACCCTTTGGGAAAT
A_23_P259442	0.08451	0.000221	-5.65535	0.96306	-2.92415	A_23_P259442	NM_001873	TCTTGTGCTGACTAACTATAAGCATGATCTTGTTAATGCATTTTTGATGGGAAGAAAAGG
A_23_P127891	0.08451	0.000223	-5.64722	0.95314	-1.76229	A_23_P127891	NM_170735	AGGTTCAAGAGGCTTGACATCATTGGCTGACACTTTCGAACACGTGATAGAAGAGCTGTT
A_33_P3307253	0.08451	0.000227	-5.63551	0.93884	-1.41418	A_33_P3307253	NM_012093	GGGCATTGTTATTGATGGATTTCCAAGAGATGTTGCCCAGGCTCTATCTTTTGAGGACCA
A_33_P3422466	0.08451	0.000228	-5.63325	0.93608	-0.766247	A_33_P3422466	NM_173855	CTGATGGTGTGCTGGCGGAGGCCTTGGCCATGTTCAGGAAGACAGAGGAAGGAGATTGAT
A_24_P405621	0.08451	0.00023	-5.62428	0.9251	-0.871701	A_24_P405621	NM_007184	TGAAGTCCAGTGGCAGGTGTTTGTCCCCAGTGCTGAGAGCAGAGAGAAGCTCATCTCGCT
A_24_P944616	0.08451	0.000231	-5.62153	0.92173	-0.592113	A_24_P944616	NM_016287	AGTATGGCTGGGAAATGGACTTGAGAAGATTGGCTTGAATTAGATCATAATCATGTGTGA
A_33_P3224045	0.08451	0.000233	-5.61781	0.91717	-0.982927	A_33_P3224045	NM_001348	GGACGCCTAGGCAAGAGCGGCCCTCTGCAGCCAAGAGAAATAAAATACTGGCTTCCAGAT
A_33_P3222069	0.08451	0.000233	5.61683	0.91597	1.69923	A_33_P3222069	NM_182965	ATGTAAGGCCTTCTAGTTTGTTCTGAGACCCCCACCCCACGAACCAAATCCAAATAAAGT
A_33_P3223980	0.08451	0.000233	5.61602	0.91498	0.448651	A_33_P3223980	NM_001043352	TTCCCGGAGAATCCAGCTGGGCTAGAGGCTGAGCACCTTTGGAAACAACATTTAAGGGAA
A_24_P244706	0.08451	0.000234	-5.612	0.91005	-2.80244	A_24_P244706	NM_001049	GCTTCAACAACTTTGTGCTTTCCTGAAAGCAGTAACCAAGAGTTAAGATATCCCTAATGT
A_23_P65518	0.08451	0.000238	5.5995	0.89471	1.32441	A_23_P65518	NM_016651	ACCGAAGCGTTGACCTGAACATATTAGTGCAATCCAGTCCAGATTGGACCTTTGATCCTA
A_23_P352435	0.08451	0.00024	-5.59512	0.88932	-0.542506	A_23_P352435	NM_002926	TTCAGTGAGTGTGAAGGTGAACAGGATGGCCTGGCAGCAGGGATGTTTCCGTGAGCCACA
A_23_P147431	0.08451	0.00024	5.59414	0.88812	1.68657	A_23_P147431	NM_002350	TGGGAAAGTATTCTGTACTCTTAGATGGATTCTCCACTCAGTTGCAACTTGGACTTGTCC
A_24_P184799	0.0847	0.000251	-5.56205	0.84857	-2.47759	A_24_P184799	NM_004086	TTCTTAGAATCCCAGCAATAATGGTAACATTTTGACAACTGAAAGAAAAAGTACAAGGGG
A_23_P165078	0.0847	0.000252	-5.56059	0.84677	-0.515767	A_23_P165078	NM_031213	GTGCCGCGGTGGTGCTGCACTCGCCGCTCACCTCGGGCATGCGCGTCGCCTTCCCCGACA
A_33_P3307144	0.0847	0.000252	-5.55982	0.84581	-0.863922	A_33_P3307144	NM_021956	ATCATTTCTTCGTATACTGCTAACTTAGCCGCCTTTCTGACAGTGGAACGCATGGAATCC
A_23_P128008	0.0847	0.000253	-5.55545	0.84042	-1.96738	A_23_P128008	NM_021827	AGTAAATAGAGTCAACCAATGCTTACAGGAGGACTGGGAAAGGAGTGCTGCGATGAAGAA
A_32_P30649	0.0847	0.000254	-5.55329	0.83775	-0.735214	A_32_P30649	NM_004454	TTTATAGCTTTCTTAACCTACACATAGTCTATACATAGATGCATATTTTACCCCCAGCTG
A_33_P3376341	0.0847	0.000256	-5.549	0.83243	-0.803037	A_33_P3376341	NM_001024678	CGCCGGAGATTGGCCGGTGCGGCCTCGCGCATGCTCCGTCAGTAAAGGTGGAAGCCGCGC
A_23_P69586	0.08481	0.000258	-5.54111	0.82267	-1.91632	A_23_P69586	NM_005245	AACTACTGTCATCGTGAGGTTTTCATCGGCTGTGCCATTTCCCAACGTCTTTTGGGATTT
A_23_P43810	0.08567	0.000265	5.52431	0.80184	2.26882	A_23_P43810	NM_206943	CATATGTAAAATTCAATGGAAGAGAGGTGGAACAGTGCTGTTATTTTAAACAGAAGGTTG
A_24_P338145	0.08567	0.000269	5.5114	0.78579	0.794515	A_24_P338145	NM_013442	CGTCACCCAGCTAGCTCAAACAACCATGAGATCAGAGCTCGGCAAACTCTCTCTGGACAA
A_33_P3394868	0.08567	0.000274	-5.49968	0.77121	-1.31218	A_33_P3394868	NM_001163724	ATCATCTTCATCCTGGGCTACCTCACAGGCTACTATGTGCACAAGTGCAAATAAATGCTG
A_23_P55936	0.08567	0.000276	-5.49329	0.76325	-1.14715	A_23_P55936	NM_004107	CTGTGGTCTGCCTCAGTTTCCCCTCCTAATACATATGGCTGTTTTCCACCTCGATAATAT
A_32_P100258	0.08567	0.00028	-5.48245	0.74972	-0.853631	A_32_P100258	NR_024279	ACGCACTGCGCAACTGTTTTCCAGATACGGGTTTATAGCCCATTATTTATATCGGAGCCA
A_24_P398940	0.08567	0.000282	-5.47746	0.74348	-1.01194	A_24_P398940	NM_138423	CACTTGGTTGGTTGTATTGTAGCTATTACTTATACAGCAACATTTCTTCAATTAGCAGTC
A_23_P111402	0.08567	0.000283	5.47631	0.74204	2.09484	A_23_P111402	NM_032784	GTCATGTGTTTTCTTTCTCAATGAGGGAAAAACAATTTTATTACCTGCTTAATGGTCCAC
A_33_P3226775	0.08567	0.00029	-5.4582	0.71939	-0.424705	A_33_P3226775	NM_001098516	CTACATATGAGGACACGGACATGTACATATGATGCTGATTACTGTTATTTTTGGAAGTAA
A_33_P3341234	0.08567	0.000293	-5.45191	0.7115	-0.540034	A_33_P3341234	NM_003344	CAAGGTTTAAGTCAGTGAGGTTGGAAGATACCCTATCTTTTTTATTCAAAAAGCACAATC
A_33_P3392525	0.08567	0.000294	5.44887	0.70768	0.554652	A_33_P3392525	NM_001661	TAGATTGTGTGTTACGGGATGGCTTGTGAAAATTATAGGGGGGAGTGGAAAACCCCTCAA
A_23_P2801	0.08567	0.000294	5.44757	0.70606	0.740943	A_23_P2801	NM_172373	TTAAAGCATCAGCCTAAGAATGGCACTCCCACTAACTAGCCATGTAATCTTGACCTCTTT
A_33_P3399291	0.08567	0.000302	-5.43023	0.68427	-0.527512	A_33_P3399291	NM_001242840	ACATAGCAGCCGGCGACTTCATCGAGCATGCCGAGTTCTCGGGGAACCTGTATGGCACGA
A_24_P37441	0.08567	0.000303	5.42769	0.68108	0.850693	A_24_P37441	NM_002610	TGGACACGAAGTGATTTTTGTAACCTGAGCAGTTAATGAATGTGCCAACATTTTCTAGGA
A_24_P873764	0.08567	0.000305	-5.42104	0.67271	-1.14157	A_24_P873764	NM_004327	GGCTTTCTCTTGGTAAGTGGCTGGTGTCTTAGCAGCTGCAATCTGAGCTCAGCCACCTAC
A_33_P3280066	0.08567	0.000306	5.41993	0.67131	0.481787	A_33_P3280066	NM_012232	GAGTTCGGGACCAGCCTGGCAAACACCCCATCTCTACTAAGCGAAAACCCATCTCTACTA
A_24_P261417	0.08567	0.000306	-5.41882	0.66991	-1.76289	A_24_P261417	NM_015881	GGTAATTGTAGGGCGAGGATTATAAATGAAATTTGCAAAATCACTTAGCAGCAACTGAAG
A_23_P311740	0.08567	0.000309	-5.41221	0.66158	-1.13643	A_23_P311740	NM_015089	CTGCCCCTGTCATAGGGAGGGGGATTCCCAGCGTCTGTAGTGCTTCCTGTTTGCTGAATA
A_24_P16326	0.08567	0.00031	-5.41032	0.6592	-0.967124	A_24_P16326	NM_002942	GCCCATTTTCTACTGACAGTAACACCAGTGCAGCCCTGAGTCAAAGTCAGAGGCCTCGGC
A_23_P126716	0.08567	0.000312	-5.40486	0.65232	-0.846127	A_23_P126716	NM_178191	GTGTGCCATAGAATGGCACATGTCATTGCCCACTTCTGTGTAGACATGGTTCTGGTTTAA
A_23_P342934	0.08567	0.000314	-5.40066	0.64701	-0.461622	A_23_P342934	NM_005078	GAGGGGGGAAAGTGTATAAACCTACAGGGTTGTGAGTCTGAAAAGAGGATCCCCCTCACC
A_33_P3228435	0.08567	0.000314	5.40059	0.64692	0.774284	A_33_P3228435	NM_005031	ATGGCGTCTCTTGGCCACATCTTGGTTTTCTGTGTGGGTCTCCTCACCATGGCCAAGGCA
A_33_P3282390	0.08567	0.000316	-5.39585	0.64093	-1.11546	A_33_P3282390	NM_000841	CGACCACACGGAGTTCAGTGCCTGGGTGTTTGGTGATGGTTATTGACGACAATGTGTAGC
A_23_P139864	0.08567	0.00032	-5.38797	0.63098	-1.07324	A_23_P139864	NM_031289	ATCTGTAGAGGAAGAGCAGTGTTAGGAGTTAAGCGGGTTTGGGGAGTAGGCTTGAGCCCT
A_23_P202769	0.08567	0.000321	-5.38495	0.62715	-0.496276	A_23_P202769	NM_005528	GCAGCAACACAAACAAAACAAACAAGTGCTGGGGTACTGCCTCCTCCTCATGCTGGCGGG
A_32_P52153	0.08976	0.000339	-5.34637	0.5782	-1.23321	A_32_P52153	NR_038453	TTCCGCAAAGTGTTCTCTCCTTGTATTATTCTAATTACGGTATTTTTAATTTCCTTAAAA
A_33_P3265494	0.08997	0.000345	-5.33365	0.56202	-1.09941	A_33_P3265494	NM_001013732	AGAGAGGAAATTGAATGCATAGAAATTCAAGAGAACCCGGATCACGTCACCACAGTATGA
A_23_P69877	0.08997	0.000346	-5.33172	0.55955	-1.07028	A_23_P69877	NM_152283	TCACTCTCTCTTTGTCATGAAAGCCAGCTCCTTGTGGCGAGGTAAAGTGGAATTCCAATA
A_33_P3336696	0.08997	0.000348	5.32838	0.55529	0.446974	A_33_P3336696	AK311996	TCAATCTCCAACACATATGGCCTAGACTACGTACATAACCTAAACCTACTCCAATGCTAA
A_33_P3246985	0.09019	0.000353	5.31774	0.54171	1.05483	A_33_P3246985	NM_022359	CAAAAACTGGGAAGATGTACCAGGAGACCAGGTCAAGCCCGACCAATACACTGAGGCCCT
A_23_P138680	0.09019	0.000356	5.31187	0.53422	1.44038	A_23_P138680	NM_172200	GAATCTTCCGTCCCTCATCCTAACTTGCAGTTCACAGAGAAAAGTGACATACCCAAAGCT
A_24_P74932	0.09019	0.00037	5.28503	0.49986	0.911949	A_24_P74932	NM_002668	CAATCCTCTACCTGATCACCTCCATTGTTGTCCTTGTTGAGAGAGGAAACCACTCCAAAA
A_24_P204204	0.09019	0.000372	5.28052	0.49406	0.717769	A_24_P204204		GGGATTGAAATGTCAATAAACCTTGCTTGGACGGCTGGAAACAACACCCATTTTGGCATT
A_24_P237586	0.09019	0.000373	5.27855	0.49154	0.914847	A_24_P237586	NM_181726	CTTCCAAGTGAAGATCCATTTAAGAACACATGTATTTACATGCCTATAATATGCTGGTTG
A_33_P3282384	0.09019	0.000376	5.27435	0.48614	0.747932	A_33_P3282384	AK299336	TTTACCCAGAATGATGTACAGAACCGTGACATGCCTATGGATATCTCAGCTCTGTCCTCT
A_24_P197537	0.09019	0.000379	-5.26784	0.47777	-1.79049	A_24_P197537	NM_003719	GCTTGACTGTTTTCCTCAAGAACATCGATCTGAAGGATTCATAAGGAGCTTATCTGAACA
A_33_P3420852	0.09019	0.00038	5.26615	0.47561	0.874095	A_33_P3420852	NM_199180	CCCTTCCCATATGCTGCCTTCCCCACACCTAGCCACCCGCGTCTCCAGACTCACGTGTGA
A_23_P393645	0.09019	0.000381	-5.26533	0.47455	-1.07377	A_23_P393645	NM_139025	CTACTTTAGAGTCTTCTCCAATGTCCAAAAGGCTAGGGGGTTGGAGGTGGGGACTCTGGA
A_23_P109269	0.09019	0.000381	-5.26519	0.47438	-2.0286	A_23_P109269	NM_005560	CAGGAGCTACACTGCCTGATGTGGGCCTGGAACTGGAGGTGCGGCCCCTGGCAGTCACCG
A_33_P3281616	0.09019	0.000384	-5.25915	0.46661	-0.454158	A_33_P3281616	NM_207327	TTAGAATTCTGAGAGGCAGGAACTGCTCTGTCTTTGTAACTACTCAAGGCCAACTGTCAC
A_33_P3347697	0.09019	0.000389	-5.25041	0.45535	-0.850134	A_33_P3347697	NM_002515	GTGTATCTCGTGGAATCAGTGGTTAGCATTGCCGCTATTATATTTACTCATTTTATCATT
A_33_P3255824	0.09019	0.000389	-5.24951	0.45418	-1.57808	A_33_P3255824		TGATCTTGATCTACAATTGTTGGGAAAAGGAAGCAATACAGACATGAGTAAAAGGGCTCA
A_33_P3326432	0.09019	0.00039	-5.24766	0.4518	-0.907126	A_33_P3326432	NM_003009	ACAGAAAGCAAGTTTCTGAAGTTGGTGGCCGCCATCAAAGCCGCCTTGGCTCAGGGCTAA
A_33_P3252834	0.09019	0.000391	-5.24697	0.45091	-1.10207	A_33_P3252834	NM_012396	ATGAAGATGCAGCCCCTGGATGGTCCCAGACTCTCAGGACATGCCCAGCTCAGGGGCTTC
A_23_P360754	0.09019	0.000391	5.24608	0.44976	2.0532	A_23_P360754	NM_005099	AAATTGAATTCTACTATTTATGTGATCCTTTTGGAGTCAGACAGATGTGGTTGCATCCTA
A_23_P255672	0.09096	0.000397	5.23538	0.43595	3.38725	A_23_P255672	NM_032432	AACTGGAAACCCCCATTTCTCATTAGTGCAATGTCATATCTGATCCCAGGAAGCCTGGAA
A_24_P168416	0.09206	0.000405	-5.22232	0.41909	-1.6175	A_24_P168416	NM_181738	TGACTTCAAGGCCACAGCGGTGGTTGATGGCGCCTTCAAAGAGGTGAAGCTGTCGGACTA
A_23_P145895	0.09277	0.000413	-5.20866	0.4014	-1.37072	A_23_P145895	NR_015381	AGGAGACAAACTGTTTGGAAAGCTAAATCTTCCCTCTTAATGAATAAAGGTTTTTGCCTT
A_33_P3373259	0.09277	0.000414	-5.20657	0.3987	-1.17158	A_33_P3373259	NM_018398	AAATGCTATGGTGAATCGAAAGACGGGGAAGTTTTCCATGGAGGTGAAGAAGACAGTGGA
A_24_P193435	0.09277	0.000416	-5.20311	0.39421	-0.634807	A_24_P193435	NM_003257	CTAGTTTGATTAAATTCTTGCAAAGTATCCCTACTGTAATTTGTGATACAATGCTGTGCC
A_23_P358597	0.0935	0.000429	5.18148	0.36612	1.46143	A_23_P358597	NM_022361	TATAGGAAAAAGATATCACTATGATATTCGGCTACCCAACTTCTATCAAATGTCAACTCC
A_23_P82334	0.0935	0.000434	5.17348	0.35571	0.606364	A_23_P82334	NM_014251	ATGAAAACCACATTGGAGATGTTTAGTAATCATATTGTTACTGGTACCAAGACTACTAGG
A_23_P320290	0.0935	0.000434	-5.17308	0.35518	-0.568196	A_23_P320290	NM_178835	CGAATGTGTTTTTTGCAACTTTGTCTGCAAGACGAAGAACATGTTTGAGCGTCATCTGCA
A_33_P3415052	0.0935	0.000435	-5.17231	0.35418	-1.30866	A_33_P3415052	NM_001172292	AGGGCCCTAAGAGTGTGGTCTGCAGGGTCAAGAATAAAGATTACAGATTATATTTACTTG
A_33_P3234197	0.0935	0.00044	-5.16336	0.34252	-0.585457	A_33_P3234197	NM_025188	CCCTGCCAAGGTCTTCACTGTATATATTTTGTGTGTTCTTCTGAAACTCTTGATTTCTTA
A_24_P179816	0.0935	0.000441	5.16174	0.34042	1.32535	A_24_P179816	NM_024330	CCCACGCTTTGGACCTTATGCAGCTCTACACCCACGTGTCTGAGAACTTGCCACCTTATG
A_23_P8561	0.0935	0.000442	-5.16087	0.33928	-1.33048	A_23_P8561	NM_001040457	AAGTCATCTCACTTGGCCTTCTGAAGGTCCTCCCTAAGAGTCTCCTGACAAAAGTTACTT
A_33_P3265920	0.0935	0.000444	-5.15828	0.33591	-0.554542	A_33_P3265920	NM_002830	ATCTCTGTTATACACCTGTATCATGAAAGCAAAAAGAAGTAAACATCAGGAGTCAGCTCT
A_23_P203115	0.0935	0.000448	-5.15103	0.32644	-2.49421	A_23_P203115	NM_032780	TAATGTTTTTCATGTTACTGCCTAGGGCGGTGCTGAGCACACAGCAAGTTTAATAAACTT
A_24_P703830	0.0935	0.000449	-5.15045	0.32568	-1.90816	A_24_P703830	NM_001098622	GTTTCCCTAGTGCTGGGCATCCAGTCAGCCCTCAATAAATGCTTATGAATGGATCAACAA
A_33_P3210218	0.0935	0.000451	-5.14681	0.32093	-1.31057	A_33_P3210218	NM_020474	GCACACTGATGTTTACAAGATTGAAAGAGTCTTTCTCCGAAAATCATGGTAAAGAATACT
A_24_P89426	0.0935	0.000452	-5.14504	0.31862	-0.548938	A_24_P89426	NM_019101	GTGCCCCGGAAATGGATCTACCACCTGACTGAAGGGAGCACAGATCTCAGAACTGAAGGC
A_23_P96383	0.09414	0.000458	5.13609	0.30691	0.950306	A_23_P96383	NM_006307	TGACCATATTTACTCTTTCTAACTTTCTTTACTCCATCATGGCTGGTTGATTTTGTAGAG
A_23_P86100	0.09501	0.000467	-5.12305	0.28984	-1.71064	A_23_P86100	NM_001007255	AAGCCTCGTTTTGTTTTGCTTTGTTGCAAACCTATAAAGCGTTATCACCAGAGCTATCTG
A_23_P216361	0.09501	0.000468	-5.12141	0.28769	-2.27408	A_23_P216361	NM_021110	TTAAAAAGTTCCCTTAATCTATGACATGGTAGCAATGATTTCCCTTTGGTGTCTTAATGG
A_23_P18798	0.09517	0.000472	-5.11491	0.27917	-0.926412	A_23_P18798	NM_019119	GTTCTAGTTTCCCGGCATTGATAGTTCCCTATTTGAAATATAATGTTTCTCTTGTAAGTG
A_24_P99795	0.09517	0.000477	-5.10835	0.27056	-1.14291	A_24_P99795	NM_024710	TCATTCTGCAGCTTGTGGGCGATGCCGTCCACCCCCAGTTCAAGGAGATCCAGAAACTCA
A_24_P330385	0.09517	0.000477	-5.10803	0.27014	-1.1222	A_24_P330385	NM_016609	GGACCGATTTGGCCGCCGGGGCATCCTTCTTCTCTCCATGACCCTTACCGGCATTGCTTC
A_23_P69030	0.09542	0.000481	-5.10214	0.2624	-3.51696	A_23_P69030	NM_001850	GTGTGGGTTGCTCTATTCAAGAACAACGAGCCCGTGATGTACACGTACGACGAGTACAAA
A_33_P3255209	0.09544	0.000484	-5.09802	0.25698	-1.66113	A_33_P3255209	NM_002410	TGTCCTGGCATAGAGAGCACTGCTTTGTTTTCCACTGTTGTAGAGAAAACTAGGGAGAAC
A_23_P327370	0.09569	0.000488	-5.09222	0.24935	-1.11656	A_23_P327370	NM_017712	CCTGGGGGTTTTGTGTCGTGACACTTTGTCTCAAGGAGATTCCACATAGGGATTTGAATT
A_23_P48198	0.09571	0.000491	-5.08803	0.24385	-2.45899	A_23_P48198	NM_031302	ACTCAATCACCATAGCTGATATAACTCTACCCTTAAAATATTCCCTGTATAGAAATGTGG
A_33_P3218951	0.09571	0.000498	-5.07814	0.23082	-1.39207	A_33_P3218951	NM_002945	TTTATTTCAAGTGGTTCTTGAATTCCCTCCAGTCTCATTGTGAAAGGGGCAGGGAAAAAA
A_23_P50535	0.09571	0.000499	-5.07665	0.22885	-1.16423	A_23_P50535	NM_004409	TTTTGGATGCACTGAGACCCCGACATTCCTCGGTATTTATTGTCTGTCCCCACCTAGGAC
A_23_P45524	0.09571	0.000499	-5.07642	0.22854	-0.887778	A_23_P45524	NM_014380	GATTGCCTTTGCACTCAGTGTAAGTTTCTGTCAGCAGTAGTTTCACCCATTTGCATGGAA
A_23_P65307	0.09669	0.000507	-5.06553	0.21418	-1.94707	A_23_P65307	NM_032229	TCCATACCTTGTAAATAAGTGCCTTACGTGAGTGTGTCATCAATCAGAACCTAAGCACAG
A_23_P34307	0.09849	0.00052	-5.04894	0.19226	-1.13579	A_23_P34307	NM_005482	ATTCATTTCACAGTCTTCTATTGTTGGACCACTTACATTGTACCAAATGTTTTCCTTTGG
A_24_P253215	0.09933	0.000527	5.03935	0.17956	1.07904	A_24_P253215	NM_006331	AATCCAGTATCAGATCACTTTCCAGTTGGATGTATGAAAGTTGGCACTTCTTTTTCCATC
A_24_P303145	0.10053	0.000539	-5.02344	0.15845	-1.15072	A_24_P303145	NM_054027	TACATGTCGCTTTTAAGGAAGTGCTCTTTATGTATCTAACAGATGGAAGTTTTTGCATTG
A_24_P106542	0.10053	0.000542	5.02032	0.15432	2.02481	A_24_P106542	NM_032784	TGTCCCCCAACAAATGAGACAAGAAAGTGTACAGTGCAAAGGAAGAAGTGTCAGAAGGGA
A_23_P96599	0.10053	0.000542	-5.01981	0.15364	-1.30602	A_23_P96599	NM_194324	TTGCACCTCATGCAGGATAAGCCAATTTTAACTTTCTACAATGGGTGCCTCAATAGTTTC
A_23_P12363	0.10064	0.000546	-5.01505	0.14732	-1.25527	A_23_P12363	NM_005012	ATGCACAACTTTTGTAAATGTGGTATACAGGACAAACTAGACGGCCGTAGAAAAGATTTA
A_23_P27381	0.10064	0.000549	-5.01163	0.14276	-1.34853	A_23_P27381	NM_005786	ATATTTATATGCTCTCTGTCCGATCTGTGCATGTTATTTTTCTTTTTCCGTGAGTCAAAG
A_23_P202773	0.10177	0.000559	4.9987	0.12556	1.70121	A_23_P202773	NM_001039496	AGACCCAAGCCTGACCCCATCCGAGTGGAATTTGAGTCCTAAAGAAATAAAAGAGTCGAT
A_33_P3296940	0.10177	0.000561	4.99664	0.12282	0.457931	A_33_P3296940	NM_022763	GTTAATCCAGGTGAGACTTTCACAATAAGAGCAGAGGATGGAACACTTCAGTGCATTCAA
A_23_P47565	0.1024	0.000567	4.98883	0.1124	0.624698	A_23_P47565	NM_005566	AGATACACTTTGGGGGATCCAAAAGGAGCTGCAATTTTAAAGTCTTCTGATGTCATATCA
A_23_P109171	0.10276	0.000572	-4.9828	0.10436	-1.42198	A_23_P109171	NM_001195	GTTCCTGTTTGGATTAGACCATAGTTGACCCATCTGGCATTGCCAACGAAGCCTTCATTA
A_33_P3238157	0.10334	0.000579	-4.97478	0.09365	-0.86322	A_33_P3238157	NM_078471	CTGCTCTGTCCAGGTGGTCTGGACCATAAACTCAACTTGAGAGGGAAGGCTTGGGGTTGA
A_23_P107963	0.10334	0.000581	-4.97181	0.08969	-0.482222	A_23_P107963	NM_000148	AACTCAGCTGCCACGGGTGAGAGAGCAGGAGGTATGAATTAAAAGTCTACAGCACTAAAA
A_23_P210330	0.10375	0.00059	-4.9615	0.0759	-1.21687	A_23_P210330	NM_014181	AGGGAGCCCTGTTTGCCTTGAGATAAACGGCCTTGGCATTTTCTGGCATTAATGTAGAAA
A_23_P137381	0.10375	0.000595	-4.95563	0.06804	-1.97571	A_23_P137381	NM_002167	AGCCAGGTGGAAATCCTACAGCGCGTCATCGACTACATTCTCGACCTGCAGGTAGTCCTG
A_33_P3396891	0.10375	0.000596	4.95477	0.06689	1.31696	A_33_P3396891	NM_021732	AGCAAGAGGCTGCTGCCACTGACCTGCTCCATTCAGAACAAGACTGGATGCTTCTGTTGA
A_33_P3371663	0.10375	0.000601	4.94893	0.05906	0.42617	A_33_P3371663	NM_002344	ATCCTTCATCTGGGCAGACCCCCCACCCTGCAGATGCTTCTAATAAAAAGCTCTTCTCAT
A_33_P3271051	0.10375	0.000604	-4.9461	0.05527	-0.783057	A_33_P3271051	NM_004227	GATGGCTGTCAGAGCTCTTGCAGATACTGTGTTCACTAAATAAAAATCACATGTATTGTT
A_23_P30464	0.10375	0.000607	-4.94245	0.05038	-1.32725	A_23_P30464	NM_030567	CCCCACCGGCGGACTCCTGGCCTGACTGCGGGGCTTTTTAAATGCTTCCCTGGACTGCGG
A_33_P3394833	0.10375	0.000607	-4.94217	0.05001	-2.05665	A_33_P3394833	NM_001040061	TGAGGGACATTTGTTTCCAGTTTTTGGATATCATAAATAAAGCTGCTGTGCACATTGTTG
A_23_P62081	0.10375	0.000612	-4.93704	0.04311	-2.47503	A_23_P62081	NM_003020	TTGCAGTTTAAAATGGTGTCTGAGGTTGTACTATTTTGGCCAAGTCTGTAGAAAGCTGTC
A_33_P3296479	0.10375	0.000613	-4.93586	0.04153	-1.23582	A_33_P3296479	NM_001204303	AAGAAAGTGACAATGTGGATTCTGCTGATGCGGAGGAGGATGACTCGGATGTCTGGTGGG
A_23_P209904	0.10375	0.000614	-4.93453	0.03975	-1.00394	A_23_P209904	NM_002081	AGGTCCCCGGTTGCTGGTCAGGTCCCCATGGCTTGTTCTCTGGAACCTGACTTTAGATGT
A_32_P174365	0.10399	0.000619	-4.92956	0.03308	-0.904691	A_32_P174365	NM_015265	CTGTCATATAATATCTATTTGGAAGAAGAAACTTTCTCTTGTAGTGCCTCTTGACAAAGC
A_32_P47157	0.10466	0.000626	-4.9219	0.02278	-0.371918	A_32_P47157	NR_024006	AGACACCGAGTACAGGCGAGGGACTTTATTAGGTCAGGGATTTAATCAGGCATCTGTTTT
A_23_P216108	0.10516	0.00064	-4.90608	0.00148	-0.876221	A_23_P216108	NM_000037	CTCTTGGCATGAATGACTGACTGTAGACGCATGACCTCCAGGCTTCAATCCTGCCTCTTG
A_23_P121082	0.10516	0.000643	-4.90364	-0.00182	-1.02804	A_23_P121082	NM_000158	TTGTCCACTAAGTATCTTGTTAAATGCCAGTATCTCAGTCTTTCTGAAGCCCTGAAATGG
A_33_P3392882	0.10516	0.000649	-4.89663	-0.01127	-0.817264	A_33_P3392882	NM_207481	CAGCAGTACAGATGAGGGAAAAGAAAAGACCAAATTGCTATTAGAGAGATTGAAAGCTCT
A_33_P3390778	0.10516	0.000651	-4.89482	-0.01371	-0.907211	A_33_P3390778	NM_025058	GTTATTGTCATGGTTTATAAACAATAAACTGTGATGCCAGGCACATCTCTGCCTTCCCTG
A_33_P3649236	0.10516	0.000653	-4.89271	-0.01656	-0.370151	A_33_P3649236	AK091264	CCACCTTTTCGAAGTGGAGACCTCTATAAAATGAAATGATTCTATACCTTGAAAATACCT
A_23_P139687	0.10516	0.000654	-4.8921	-0.01739	-1.63681	A_23_P139687	NM_152321	TTTTAAGGTTACCTAAGGGTTGAAACTCTACCTTCTTTCATAAGCACATGTCCGTCTCTG
A_23_P151075	0.10516	0.000654	-4.89151	-0.01817	-2.9045	A_23_P151075	NM_001175	TCAGGTTCCAGTAGTTCATTCTAATGCCTAGATTCTTTTGTGGTTGTTGCTGGCCCAATG
A_23_P27744	0.10516	0.000658	-4.88758	-0.02348	-0.757846	A_23_P27744	NM_001080469	TTTCTTTAAGAATCCTTTGGTCAACCAGGACCTTGATTTTTCAGGCATTTTGGTCTGGGG
A_33_P3370848	0.10516	0.000661	-4.88445	-0.02771	-0.371067	A_33_P3370848	NM_014209	TTGCTCCGAACCGAGCCCGCAGTCGGACCGTGCCAGTTTGGCTCGATGCCCCAAAACTAA
A_23_P149649	0.10516	0.000662	4.88316	-0.02946	0.769113	A_23_P149649	NM_003000	ACCCTCTTCCACACATGTATGTGATAAAGGATCTTGTTCCCGATTTGAGCAACTTCTATG
A_33_P3217465	0.10516	0.000665	4.88027	-0.03337	0.528959	A_33_P3217465	NM_021242	CATTCTATCGTGTTGTACATAGAATGATGAAGGGTTCCACTGTTGTTGTATGTCTTAAAT
A_23_P49082	0.10516	0.000668	-4.87781	-0.03669	-0.687755	A_23_P49082	NM_012225	CTTCTGTAGGAAGACGGGCTTGCGGGTGATGGGAATCGTGGAGAATATGAGCGGCTTCAC
A_33_P3419691	0.10516	0.000672	-4.87327	-0.04282	-1.40165	A_33_P3419691	NR_028038	GGTCTGCCACTGCCTGATTGATAAAATTGCTGAATGCTCAAATAAACCTGTTAAAATTGT
A_23_P338479	0.10516	0.000678	-4.86742	-0.05075	-1.927	A_23_P338479	NM_014143	GAGTTTTTCCTATTTATTTTGAGTCTGTGAGGTCTTCTTGTCATGTGAGTGTGGTTGTGA
A_23_P149626	0.10516	0.000678	-4.86728	-0.05094	-1.2168	A_23_P149626	NM_198681	CTTCCCAGTCCCACAGGCCACCCCTGGCTTGGGCTGGGTTCTGTGAAGTTACGTATTTAT
A_23_P30294	0.10516	0.000678	-4.86695	-0.05139	-1.09945	A_23_P30294	NM_001801	AGGAACTTACGGCACTCTGCCATTTGTTAATGAAAGGAAGTGCAGAGGATTTAGAAAAGT
A_23_P27005	0.10516	0.000682	-4.86369	-0.0558	-0.329585	A_23_P27005	NM_024308	AAAGGAGGTGGTGTCCCTAATTGTTTTACTTGTTAACTTGTTCTTGTGCCCCTGGGCACT
A_23_P105028	0.10516	0.000688	4.8573	-0.06446	1.33588	A_23_P105028	NM_015459	AGCTCAATAGCATCTTAACGTGAAGATCAAACAAGAACACAACAAGCCCCTACTGATTTC
A_33_P3223488	0.10516	0.000695	-4.85108	-0.07289	-1.02022	A_33_P3223488	NM_023037	TGGTATAAAAGGCAAAATGGCATTGAGGATGAATCACATGAATACAGACCAAGAACAAGC
A_23_P4922	0.10516	0.000695	-4.85059	-0.07356	-1.27499	A_23_P4922	BC043386	GAGAGTCTCCAGCAGGGGAGGGGAATTGTTTGGACTATTGTTCTTCAGGATTGGAATAAA
A_24_P357536	0.10516	0.000698	-4.84775	-0.07741	-0.686277	A_24_P357536	NM_001190274	ATCTTTGTAGAGCAGCTTGTGTATGTAAACGCTTCAGTGAACTTGCTAATGATCCAATTT
A_33_P3422822	0.10516	0.000699	-4.84695	-0.0785	-1.40879	A_33_P3422822	NM_020435	TCCTCCCTAATTCAGACCCAGCCTCAAGAGGAAAGGGAGTAAAATAAAACTAACTTGTTT
A_23_P216455	0.10516	0.0007	-4.84632	-0.07936	-1.97231	A_23_P216455	NM_005059	TACTCATTCTCGAAAAAAGAGACAACTCTACAGTGCATTGGCTAATAAATGTTGCCATGT
A_32_P162187	0.10524	0.000703	4.84289	-0.08402	0.948726	A_32_P162187	NM_000063	TTCTACCTCTGAATGGCCACCCTTAGACCCTGTGATCCATCCTCTCTCCTAGCTGAGTAA
A_23_P60324	0.10548	0.000709	-4.83722	-0.09172	-0.450312	A_23_P60324	NM_016172	TTTAGCATCTGACAGGTGTTTACAAAAAAGTGGTTGTCGCACTGGGAAGTGGAGTGATGG
A_23_P73763	0.10548	0.000711	-4.83509	-0.09462	-0.875352	A_23_P73763	NM_006014	ACTTTGCGTCTCCTTGTAGGCAGTGCGTCCATCCTTCCCTAGGGCAGGAATTCCCACAGT
A_23_P137103	0.10548	0.000714	4.83254	-0.09809	1.14059	A_23_P137103	NM_001416	AAGACAAGAGGACTCTTCGAGACATTGAGACCTTCTACAACACCTCCATTGAGGAAATGC
A_23_P204998	0.10571	0.00072	-4.82713	-0.10545	-1.71216	A_23_P204998	NM_005766	TCCTCCTGCAACTGTGGTTTGAAACTGCGCATTCTCTAGTAGTATATATCGTGCCTGTCT
A_33_P3317948	0.10571	0.000722	-4.82525	-0.108	-0.620684	A_33_P3317948	NR_033711	CGAAAAACACGGATGGGATTTCGTTTTCACCTTAAAGCATTAAAGTGCTTTAACTGGTAA
A_24_P636318	0.10598	0.000727	-4.82065	-0.11427	-0.645241	A_24_P636318	NM_001009993	GGAAACTGCATGTTTCAGAAAGTTTGTCTCTTTTTCCTACTCATTATTTGAAGAAGAGAG
A_23_P351667	0.10725	0.000739	-4.80982	-0.12904	-1.20934	A_23_P351667	NM_003812	GCCTTGCACTGTTGGATTCTGGGTATGACATACTCGCAGCAGTGTTACTGGAACTATTAA
A_23_P15394	0.1076	0.000744	4.80473	-0.13598	1.91877	A_23_P15394	NM_001251	GGGTACCCTTATTTCCTCGACACGCAACTGGCTCAAAGACAATGTTATTTTCCTTCCCTT
A_33_P3378031	0.10819	0.000754	4.79612	-0.14773	0.794222	A_33_P3378031	NM_152834	ATGGTTTGAAAAACCGTTGTTTTATTTAAATATCCACAGTGGTAGGGCACACACTGAAGT
A_33_P3370751	0.10819	0.000755	-4.79539	-0.14873	-0.567758	A_33_P3370751	NM_022739	TATGGCGTAAATTACTTTGAAGAGTTCATTTTGGAAGTAAGGGAATCCCGCTTCCCTTGG
A_23_P413193	0.10822	0.000758	4.79243	-0.15278	0.571346	A_23_P413193	NM_145247	AGTCATTTGGGCAGTTCTGGAAACTAGTTTTAATACATTTGTTTTTTATGACAAAAAGTT
A_24_P342632	0.10847	0.00077	-4.78156	-0.16765	-0.847119	A_24_P342632	NM_174858	CGTCATGGCTAAGAGAACAAATCTGATAAATTGTGTAACCTAGTCTCTTCTCTACATGGT
A_33_P3383326	0.10847	0.000772	4.77973	-0.17015	2.42641	A_33_P3383326	NM_057159	CCACACCTGCAATGTAAAATGGAAGAAAATGCAAAGAAACCAAATGTGCCGAGTGAATAA
A_23_P162300	0.10847	0.000775	4.77765	-0.173	0.767328	A_23_P162300	NM_007199	TTGTCTCATGACCAAATCCACGCTCAATTAGAGCCATTCAAAATTCCTTAAGATCATGGG
A_33_P3209386	0.10847	0.000779	-4.77427	-0.17763	-0.669769	A_33_P3209386	NM_032731	TTTTTCATTTTCCCGATGTGTTATTTTGCTGTTGCTGCTCTGCCAAGGCTTGCTGAAGGC
A_33_P3275801	0.10847	0.000781	4.77258	-0.17994	2.03695	A_33_P3275801	NM_001927	CTCCCCTCCCCTGCTGCAGGGGCTCTGGAGAGAAACAATAAAGAGATTCACACACAAGCC
A_33_P3238543	0.10847	0.000789	-4.76583	-0.1892	-0.452472	A_33_P3238543	NR_015454	AATGAAAAATAAATGGGGGCAGAAGCTGAGCCAAGCAGAGGCGGGCAGCTCCTCCTCCAG
A_24_P116351	0.10847	0.000789	-4.76545	-0.18972	-0.419638	A_24_P116351	NM_006427	TGGCCTCGTGGACTGCAGTGACATGTACGAGAAAGTGCTGTGCACCAGCTGTGCCATGTT
A_33_P3508822	0.10847	0.000791	-4.76345	-0.19247	-1.52001	A_33_P3508822	NM_000484	CAGGATGATTGTACAGAATCATTGCTTATGACATGATCGCTTTCTACACTGTATTACATA
A_23_P97328	0.10847	0.000793	-4.76172	-0.19483	-0.684824	A_23_P97328	NM_024319	CTTGGCCTGCGAAGGTGAACCTGCCCAGATTTATCAGTAGAGGCTGGACTCCCTCTGTGT
A_24_P49106	0.10847	0.000794	-4.7615	-0.19514	-0.784887	A_24_P49106	NM_152278	GAAGAAAAGGAGCAGGAAACTACCCCGCACAGAGTTAAGCAGGAAACAACAACAACATCA
A_23_P83098	0.10847	0.000797	4.75909	-0.19844	3.18022	A_23_P83098	NM_000689	GGAGAGTACGGTTTCCATGAATATACAGAGGTCAAAACAGTCACAGTGAAAATCTCTCAG
A_33_P3420259	0.10847	0.000801	-4.75565	-0.20316	-0.734052	A_33_P3420259	NR_003287	TGGGATTATGACTGAACGCCTCTTAAGTCAGAATCCCGCCCAGGCGGAACGATACGGCAG
A_33_P3608172	0.10847	0.000801	4.75542	-0.20348	0.558311	A_33_P3608172	NM_004489	GTGACCATCAGATTATATCTTCAACACCACACCCCCCACCCCATCGTGGGTGAGGGTATC
A_23_P318904	0.10865	0.000805	-4.75167	-0.20863	-1.68638	A_23_P318904	NM_019605	GTTTGCCAGTTAATTAGGGAGTTATTTGGTAAGCAAATCAATATAACCAGCAAAGATACC
A_23_P9458	0.10915	0.000812	4.74594	-0.21651	1.04533	A_23_P9458	NM_022490	TTACGGAACTTAATTTCGGATTCTATGAAGGCGAAGATTACTGCATATGTGATCATACTT
A_32_P154473	0.10949	0.000818	-4.74122	-0.22301	-1.47217	A_32_P154473	NM_004522	TGGTGGTTTATATCAATAACGATGCTGTACTATAGTCCATGTAACAAAAGATCTGGAAGT
A_23_P348281	0.10969	0.000823	-4.73727	-0.22843	-0.403196	A_23_P348281	NM_153035	AAACAAATTGCTCTCTGGCTGAAAGCCTTCAGTGGTGATAGTTGGAAAGTAGAATGATTG
A_23_P35256	0.10969	0.000826	4.73482	-0.23181	0.45063	A_23_P35256	NM_006468	GGAGGCAATTTGAAACCAAAGAGAATAAGCGTCTACTAGAAAAATCTCAGAGGGTAGAAG
A_23_P347169	0.11083	0.00084	4.72391	-0.24684	0.938546	A_23_P347169	NM_001001924	GGTGCTGAAACCACTTTCCAAATAAACTAAAGCCTGGATTTGATATTACAAATTTTGGGA
A_33_P3331491	0.11083	0.000844	-4.72049	-0.25156	-2.17983	A_33_P3331491	NM_001162371	CCTGCATATTATTTACTTGCAAATGTCTGTAATCTGTAATTGTGATGCCTCTGATGGAAT
A_33_P3234031	0.11083	0.000844	4.72016	-0.25201	0.399075	A_33_P3234031	AK125981	TTGTGACTCCACCCTTCAGCCTACAGCCACATCTACCTTCGGGTATCTTTATCTCTGTGC
A_24_P55250	0.11105	0.00085	4.71597	-0.25779	0.813894	A_24_P55250	NM_016063	AGACCAATGTGAAATGATTCTTCAAGCATCTGAATATGAAGACCTTGAACACAAACCTGG
A_33_P3336700	0.11105	0.000855	-4.71186	-0.26346	-2.19166	A_33_P3336700	NM_020859	CCACTACCAATCATCTGTACAGTTCCTACTGTTATGATCACAATAAGACTAACATGAATT
A_24_P410587	0.11105	0.000856	-4.7112	-0.26437	-0.543639	A_24_P410587	NR_026903	ATAATGGGAATTTACTGAAACCCGTGGAAGGAAGCCTTTAAGGAATGGAAAGAGTGGATA
A_23_P36611	0.1112	0.000864	-4.70493	-0.27303	-0.414905	A_23_P36611	NM_181861	CAGTGAATACAATCCTTTGCATTGTTAAGGAGGTTTTTTGTTTTTAAATGGTGGGTCAAG
A_32_P70724	0.1112	0.000864	-4.7047	-0.27335	-0.790208	A_32_P70724	NM_006618	ATAGCCCATAGCTATTTTCCTTGCTTTTCTTTTTTAAAGGGGTCTGTTCTGCAGTGGAGA
A_33_P3299982	0.1112	0.000867	-4.7028	-0.27597	-0.388755	A_33_P3299982	NM_003367	CTCCCCTTTGGGGGTGTGTGTGTGTGTTTTAATTTTCTTTATGGAAAAATTGACAAAAAA
A_23_P135184	0.11127	0.000871	-4.69986	-0.28004	-0.84965	A_23_P135184	NM_001042368	TGAGGAAGGAGGATTTGGGGTGGGGGTGGGGTGATTGAATATTTGTATAAAAAGCCAAAA
A_32_P186731	0.11263	0.000885	-4.68928	-0.29467	-2.17422	A_32_P186731	NM_080826	TATCATTCTGCTAAACGGCCCCAAAACAGTAGAATTTCTGCTCATGTCCTAGCAGGTTCA
A_33_P3295523	0.11267	0.000898	-4.67955	-0.30815	-1.32523	A_33_P3295523	NM_005052	TCCTTGTGCCCCGAGGTGGGGCAGCCCCTTCTCATTTTATACAATAAACATTCTCCACCT
A_23_P207742	0.11267	0.0009	-4.67813	-0.31011	-1.01105	A_23_P207742	NM_003250	GGCATGAGTCTGTTTCCCAAGCTAGACTGTGTCTGAATCATGTCTGTATCCCCAGTGCCC
A_23_P200829	0.11267	0.000904	-4.67498	-0.31448	-1.11412	A_23_P200829	NM_015326	AAGAGAAGTCACATCTTCCAGGGAATCGCAATGTTGTGGCGTCTGACTTGTATGTCACAT
A_23_P139669	0.11267	0.000906	4.67315	-0.31702	0.600005	A_23_P139669	NM_006931	ACGCTCATGACTGTTTCTTTGTTATTAAAGGATAACTATAATGGGATGAGCTTTGTCTGT
A_23_P42368	0.11267	0.000907	4.67266	-0.3177	0.538547	A_23_P42368	NM_016485	ACAGCACAGGTGTAGCAAGTAATACTATCCAACCTACTCCACAGACTATACCTGCCATTG
A_32_P232559	0.11267	0.000908	4.67188	-0.31878	0.956998	A_32_P232559	NR_036502	GCTTGGAGGAAACCAGTTTGCACTATTTGATGAGGAATTTGGCCACCAAACCACTGATAC
A_23_P339240	0.11267	0.000909	-4.67094	-0.32009	-1.24412	A_23_P339240	NM_014996	GGGACTTCCATCAGACTCTAATGATAATAGTAGCACAAATTGAAAACTTCCCCAAAGCTT
A_32_P60065	0.11267	0.000914	-4.66757	-0.32477	-2.24618	A_32_P60065	NM_004101	TATTTTTCCCTTAACTCAGTGATTAGACAGGAAGGAAGACATTAGTGATTAGACAGGAGG
A_24_P212129	0.11267	0.000917	-4.66571	-0.32734	-0.73613	A_24_P212129	NM_006974	TATTGTGTTCACAAACCAGAGGTGATCTTCAGGCTGCAACAAGGAGAAGAGCCATGGAAA
A_32_P183609	0.11267	0.000918	-4.66479	-0.32862	-0.731793	A_32_P183609	NM_001040445	TTTCAACAGGTGGAAGTGTTGGTCGTGCGAAATCTTGGTATTCGCATTTCAAGAAGGGAG
A_23_P160503	0.11284	0.000923	4.66138	-0.33335	0.525847	A_23_P160503	NM_016066	AAGCTTTTCCATGACATGAATGTTAACTATAAAGTGGTGGAACTGGACCTGCTTGAATAT
A_23_P19182	0.11321	0.000929	-4.65686	-0.33964	-2.35402	A_23_P19182	NM_016606	CTCCCGGTTCCTTGGGAAGAGGGTGCCCATTGGACCTTTGGCACTGGATGAGCCAATAAA
A_23_P28772	0.11377	0.000939	4.64969	-0.34961	0.989441	A_23_P28772	NM_001048226	GATTGTGTACCTTTCTAAGAATTAACCCTCTCCTGCTTTACTGCTAATTTTTTCCTGCTG
A_33_P3400224	0.11377	0.00094	-4.64889	-0.35072	-0.838122	A_33_P3400224	NM_014934	AAGCTTTTCTACAAAGTCACATTCAACGCCGCCACACTGAAGAAAATTCTCATTTTGGTG
A_23_P501547	0.11427	0.000948	-4.64362	-0.35805	-1.20406	A_23_P501547	NM_015270	CACTAGCCTGAATTTTGCTTGAAGATCACTTTGTCTTGGAAATGACTAGAGAGGCAGAGG
A_23_P15272	0.11477	0.000955	-4.63842	-0.3653	-0.788287	A_23_P15272	NM_001079528	GTTCCCCCACTGGCTGTATTATAGGACAATTTTTATATGTGATATGTATTTACCTTAGTG
A_23_P23855	0.11485	0.000961	-4.63451	-0.37074	-0.483666	A_23_P23855	NM_032305	AGAACTGGGGTTGTTAGAGCTGAGATGACTGTACACATACCCCTGCCCAATTTATATAGC
A_23_P382043	0.11485	0.000962	-4.63333	-0.37239	-0.719383	A_23_P382043	NM_152729	GTGGTGTTCTATGTGCCGTGTATGGTCATATTAGTAGCTATTTGTTGCAAGATACTTGAA
A_23_P2223	0.11542	0.000971	-4.62776	-0.38015	-1.2132	A_23_P2223	NM_002475	ACCGTTCTGGCAGGACACGAGGACAGCAACGGCTGCATCAACTACGAGGCCTTCTTGAAA
A_23_P80839	0.1157	0.000979	-4.62176	-0.38852	-0.79252	A_23_P80839	NM_024871	CGTGTGCTTATCCAAGGGGTTCAGCTATTCCTGACTTCACGGCTTGCATGTTTGATTTTT
A_23_P14774	0.1157	0.00098	4.62157	-0.38879	1.52311	A_23_P14774	NM_004390	ACCAGCCATGTGCCTTAGTGTCCTTCTTAACAGACTCAAACCACATGGACCACGAATATT
A_24_P5550	0.11665	0.000991	-4.61387	-0.39954	-0.57927	A_24_P5550	NM_024297	GAGAAGATGAAGCTCAAGGACTCTCTCTTTGATCTGGATGGGCCCAAAGTGGCATCTCCT
A_23_P119196	0.11683	0.000996	-4.61058	-0.40413	-1.71361	A_23_P119196	NM_016270	GAGACAGGTGGGCATTTTTGGGCTACCTGGTTCGTTTTTATAAGATTTTGCTGGGTTGGT
A_33_P3372979	0.11692	0.00101	4.60381	-0.41359	0.532199	A_33_P3372979	NR_015451	GGATGAATGAATGGTAATGGATAATGGGCTATGAAGTCATATTTAAAGGCACTATCTCAT
A_24_P633902	0.11692	0.00101	4.60053	-0.41818	0.445706	A_24_P633902	NM_014455	GTTCTCGTCCTGACAGATCTCCAGCTATTGAAGGAATACTACCAACACATCTTTGCAGGA
A_33_P3272563	0.11692	0.00101	-4.5992	-0.42005	-0.936418	A_33_P3272563	NM_004808	CCTCACGGTGACAGTTACACTGCTCCTTTAAAGAGTCATTTACATAATTTGTTATCAAAT
A_33_P3385266	0.11692	0.00101	-4.59854	-0.42096	-0.866973	A_33_P3385266	NM_001079528	TCTTGGATACACAAGGTAATTTTAGGGCCACATTAGGATGAACCTTTTAAAAAGTTATGC
A_24_P280868	0.11692	0.00102	4.59665	-0.42361	0.826745	A_24_P280868	NM_001137610	AAAGGGATTGTGAGAATCAAGTCACTCTCGTGGGAAGAATTTTTATATGGGAAAGTGGAT
A_24_P390928	0.11692	0.00102	-4.59605	-0.42445	-0.901085	A_24_P390928	NM_024108	CTTCAGGGAGGAGCTGGATGTCCTCAAGTTCTTGTGCAAAGACCTGTGGGTGGCGGTGTT
A_23_P215024	0.11692	0.00102	-4.59418	-0.42706	-0.762466	A_23_P215024	NM_018214	TTTTTTCTGAATAAGTCTCTCATAATGAGTGCAGTGTCAGACTGTGCCTACTCTGATGGT
A_33_P3359268	0.11692	0.00103	-4.59111	-0.43136	-0.743902	A_33_P3359268	NM_006339	GGCTCCTTCTCACTGCTGGATCCGGACTTTTTAAATAAAAACAAGTAAAATTTGTGTTTT
A_24_P298420	0.11692	0.00103	4.58715	-0.43691	0.758953	A_24_P298420	NM_001039619	CAATCTGGAATCTCAGACATATGAAGTGTTTGAAAAGGACCCCATCAAATACTCTCAGTA
A_33_P3334343	0.11692	0.00103	-4.58675	-0.43747	-0.394573	A_33_P3334343	NM_004667	AATGCATGCTGGCTGTTGATATCGAAGACAGACTGAGTCCAAATCCGTGGCAAGAAAAGA
A_23_P98786	0.11692	0.00103	-4.58567	-0.43899	-0.621253	A_23_P98786	NM_000260	ATACCAACTGGGCCTCTGATGTTCTTCCAGTGAGGCATCTCTCTGGGATGCAGAACTTCC
A_23_P159974	0.11724	0.00105	4.57812	-0.44957	0.915758	A_23_P159974	NM_033495	GTTTTCCTTTCATCTTTGACTGTAAGATGTCAAAGGGAGGCAGCCTGCTTGAACAGGAAA
A_24_P211206	0.11724	0.00105	4.5773	-0.45072	0.765222	A_24_P211206	NM_001043352	TGGGCTAGAGGCTGAGAACCTTTGCAAACAACATTTAAGGGAATGTGAGCCCAATGCATA
A_24_P82493	0.11724	0.00105	-4.57521	-0.45365	-0.560697	A_24_P82493	NM_024819	GGACCACGGGAAATCATGTTGGACCAAGGGTTTCCATGTTCAAACAGTCAACAAGGCCCT
A_23_P2920	0.11724	0.00105	4.57519	-0.45369	3.8984	A_23_P2920	NM_001085	ATAGGTGAGCTCTACCTGCCAAAGTTTTCCATCTCGAGGGACTATAACCTGAACGACATA
A_33_P3417820	0.11746	0.00106	4.57181	-0.45843	0.855567	A_33_P3417820	NM_024313	CCCTCTCCAGTGACAAGGTCATTTACAACTTACATTTACAATTTATAGTGTTTACCAGTA
A_33_P3272948	0.11754	0.00106	-4.56923	-0.46205	-1.96154	A_33_P3272948	NM_001145536	TCTGAGGCTGTGTACTATCAGTATCTGTCTCCTAAACCAATTATGCTGTGCCTGGGAACG
A_32_P63848	0.11817	0.00107	-4.56358	-0.46999	-1.084	A_32_P63848	NM_000436	CACTTCTTTTCAGGTGTAGCTACAATTGTGTAATGTACAATATTAGAGAAAGGACAGGCT
A_23_P1072	0.11844	0.00108	-4.55726	-0.47888	-1.07144	A_23_P1072	NM_000701	TGCCCTGGAATGGGTGTTGCTCTTAGGATGTATCCCCTCAAACCTACCTGGTGGTTCTGT
A_33_P3354564	0.11844	0.00108	4.55687	-0.47942	0.791758	A_33_P3354564	NM_001083112	ATGAAAACTGCAGAAGAGAACCTCGACAGAAGAGTTCCAATTCCAGTGGACCGTAGTTGT
A_23_P212756	0.11844	0.00108	-4.55497	-0.48209	-0.553484	A_23_P212756	NM_001004057	GGTTCGAGGAAGAGTTGGAACAGTCGGCTACATGGCACCTGAAGTTGTCAATAATGAAAA
A_23_P11685	0.11844	0.00109	-4.55365	-0.48394	-0.569631	A_23_P11685	NM_024420	GAAATGGCAGCAGTTTCTGATGCTGAGGCAGTTTGCAATCCCATGACAACTGGATTTAAA
A_33_P3223472	0.11952	0.0011	-4.54563	-0.49523	-0.674805	A_33_P3223472	NM_016627	CCCTATCTGTTTGCACAAGTTGCAGTGTGCTGTTGGCTTCAGCATTGTAGAAAGATACAA
A_23_P120467	0.1201	0.00111	-4.53907	-0.50448	-0.881889	A_23_P120467	NM_199427	GTCTGGGGTTGCTGGAAAACTTCTATTTCATAACCTGGGTGATCGTTCTAAGAGTGTTTG
A_23_P344451	0.1201	0.00112	-4.53646	-0.50816	-0.658849	A_23_P344451	NM_016073	AGGTGGATACTTTACATTTTAAAGCTGGAATCAGCAACAGCCCTATGGGAAACCAGACAA
A_33_P3218960	0.1201	0.00112	-4.5345	-0.51092	-1.01844	A_33_P3218960	NM_021098	AGCTTCTCAAGGGAGAGGGAGGGGGCGGAGCGGAATAAATAGTAACTTATTTAAGAAATG
A_24_P915806	0.1201	0.00113	4.53027	-0.51688	0.953425	A_24_P915806	NM_001024074	GGACAAGAAGCTGCCAGGCATAATAGGAAGATACCAGAATTGCTGTTAACAAATAAAATA
A_24_P342312	0.1201	0.00113	-4.5301	-0.51713	-0.618242	A_24_P342312	NM_001098816	CCCTTTCATTTAACCTTCCAAAAACAGCAAACTCATTTTAAAGACTCATTGCTGAGGTGA
A_33_P3369258	0.1201	0.00113	4.52998	-0.51729	0.888924	A_33_P3369258	NM_001171888	AATGGCTAGCAAAAAAGATGATCCGGGTATAATAATGAAGTTAAAAGAGCAGCACTCCAA
A_24_P43588	0.1201	0.00113	4.52655	-0.52213	0.755469	A_24_P43588	NM_001003690	CCATAAACTGACTGTGACCCTGTCATGTGGCAGACCTTCCATCCGAACCACGGCTTGGGA
A_33_P3413741	0.1201	0.00114	-4.5223	-0.52813	-2.10568	A_33_P3413741	NM_000916	GGGTGATGAAAATGTTCTGAAATTAGTGGTGATTGTGCACGATTTTGAGAATGTACTAAA
A_23_P204286	0.1201	0.00114	-4.52171	-0.52896	-2.87651	A_23_P204286	NM_000900	TACTGAAATACATAGGCTTATATACAATGCTTCTTTCCTGTATATTCTCTTGTCTGGCTG
A_23_P104996	0.1201	0.00114	4.52151	-0.52925	0.798516	A_23_P104996	NM_004183	TCAAAGAACCTTTGGAACAATCACCAACCAACATACACACTACACTCAAAGATCACATGG
A_33_P3209229	0.1201	0.00114	-4.5199	-0.53151	-1.07677	A_33_P3209229	NM_014353	GGCCTTTTGATTGCACAAGCCTTTGTTTTCAGTCCTAGTGAATAAAGTTGTGTTTTCTGG
A_24_P409857	0.1206	0.00115	-4.51522	-0.53813	-0.617656	A_24_P409857	NM_004965	GGCAATATGGAGTCAGTCCTGCATTTAATGTCTTGAACATTTTAAATTACTTCTATTCCC
A_23_P302094	0.12114	0.00117	4.50749	-0.54905	0.773931	A_23_P302094	NM_033416	GACGACTACATATCATTCCGGCACCATGTGTATAAGAAGACAGACCACCGCAACGTGGAG
A_24_P216654	0.12114	0.00117	4.50724	-0.54941	0.921014	A_24_P216654	NM_003101	CGCAGTAATGTTCTGCACAACAGTATTGTAATTGTAATGGAATCATAACCTGCTAACTAG
A_24_P56270	0.12114	0.00117	-4.50631	-0.55072	-0.614562	A_24_P56270	NM_006482	GGCTTGGGTTTTTATCGAGCAACAACTTAGACACGTGACTGTAATATGCTGCAACTGTGT
A_23_P159741	0.12264	0.00119	-4.4963	-0.56489	-0.821412	A_23_P159741	NM_017745	CAAGCTGGACCCACCATGTACAGTGTGTTATAGTGTTAATCCTTGTGCATATGTGTCATA
A_23_P27983	0.12284	0.0012	-4.49083	-0.57264	-0.466804	A_23_P27983	NM_005166	ATACCCACCTTCAAGTGATTGAGGAGAGGGTGAATCAGAGCCTGGGCCTGCTTGACCAGA
A_23_P202939	0.12284	0.0012	-4.48641	-0.5789	-1.01028	A_23_P202939	NM_001642	CGTCACAGGAGTCTTTGTAATGCTTGTACAGTTGATGTCGATGCTCACTGCTTCTGCTTT
A_33_P3224735	0.12284	0.0012	-4.48622	-0.57918	-0.439447	A_33_P3224735	NM_001010888	GCTGACAACAATGAACTGTAACCACAGTTATTTACTGCATAAACTATTTGTGTACTAACC
A_32_P355396	0.12284	0.0012	-4.48622	-0.57918	-0.981164	A_32_P355396	NM_014844	GTTGCCTGGAGTATATGCCTTTTTGTATCCTTTGAATTTCCAGCCATGTAAATGTATTAT
A_33_P3243168	0.12284	0.00121	-4.48543	-0.58029	-0.820343	A_33_P3243168	NM_198055	CCCAGGGCTTGGCTACTGTAGGTGTCCAATAAACAGTAGATGGAAACTGGGTCTCCACCC
A_23_P69326	0.12285	0.00121	-4.48173	-0.58555	-0.670768	A_23_P69326	NM_183393	GGAGAATACATAGTCTAACCACTAGGCGTGTCCCTGTTATCAGCAAAGATCAATGATGCT
A_23_P139704	0.12285	0.00121	-4.48149	-0.58588	-2.556	A_23_P139704	NM_001946	GCTTGTGTTGTCGCAAAGGGGATAATCTGGGAAAGACACCAAATCATGGGCTCACTTTAA
A_33_P3380126	0.12302	0.00122	-4.47841	-0.59026	-0.352235	A_33_P3380126	NM_173855	AGGCTTCTGGGTGGACAATATGGCCAAATGCGGGACGATGATCGACTTTGGCCGTGACGA
A_23_P42265	0.12302	0.00123	-4.47349	-0.59723	-0.611375	A_23_P42265	NM_019101	TTCATCTAAGTCCCCAGATGGGTACAATGGGAGCTGAGTTGTTGGAGGGAGAAGCTGGAG
A_24_P400044	0.12302	0.00123	-4.47222	-0.59903	-1.16248	A_24_P400044	NM_153183	GTAGTTCATATTTTGTAATGATACTGAATGGTTAAACAATCCCTTTCTAATCTGTCTAGC
A_24_P334248	0.12302	0.00123	-4.46992	-0.60231	-0.604795	A_24_P334248	NM_014996	GACCCTTTTGTTGAAGTTGAAATTATTGGATTGCCAGTAGATTGTTGTAAAGATCAAACC
A_33_P3228385	0.12302	0.00124	-4.46943	-0.60301	-0.829055	A_33_P3228385	NM_016311	TCCGGGAAGCCGGTGGGGCCTTCGGAAAGAGAGAGCAGGCTGAAGAGGAACGATATTTCC
A_23_P64879	0.12302	0.00124	4.46535	-0.6088	2.63707	A_23_P64879	NM_004982	CTTCCCTCATGGTACCAAAGGTGCAATTTATGACTCCAGAAGGAAATCAAAACACATCGG
A_23_P500410	0.12302	0.00124	-4.46533	-0.60882	-0.804379	A_23_P500410	NM_130463	CATATGCATGCCCTTCCTTTCTATATCCTTGACACCTTACTTTCCCATTGTAACAATAAA
A_23_P76488	0.12302	0.00125	4.46366	-0.61121	1.58907	A_23_P76488	NM_001423	CATGTAATTTGCATTACTCTGGTGGATTGTTCTAGTACTGTATTGGGCTTCTTCGTTAAT
A_32_P228268	0.12302	0.00125	4.4622	-0.61328	0.536496	A_32_P228268	NM_207437	TTTTTGAAGCTGATCTCTTTACCACGAGGCACATTTCTCACTGGGTGCTGCAAGGAGTAT
A_23_P212126	0.12302	0.00125	-4.46063	-0.61551	-0.36815	A_23_P212126	NM_080538	CATCACCATTTTTCCTGAGTAGGGCTTAGTTTTATTCTGGAAAGACATCTCCAAGGTGAG
A_23_P372255	0.12302	0.00125	4.45966	-0.61689	1.12474	A_23_P372255	NM_002221	TCAGTTGTATTTAGCTTTGAGTTTCTCTGCATCTGTCCACCCCATGTGTATATAACCCAG
A_33_P3225760	0.12317	0.00126	-4.45704	-0.62061	-1.41516	A_33_P3225760	NM_019035	ATGTTTTATTGAAGCTTCCTAATCCTTCTACTGTTCGATTTCGAGCCATGCAGAGGGGAA
A_23_P88703	0.12347	0.00127	-4.45356	-0.62556	-0.513065	A_23_P88703	NM_005657	CAGCCTCTGTGAAGCAGCACCATTCAAGTGCCCATAACAAAGATATTGCTTTAGGGGTAT
A_24_P98109	0.12356	0.00127	4.45125	-0.62886	1.77784	A_24_P98109	NM_013322	AAGAGTGGCAGAGGCTACTACAAAAAGCAACCTTTTCATTTTCACTAAGAGTTTAAAAGC
A_23_P144476	0.12368	0.00129	-4.44342	-0.64001	-1.379	A_23_P144476	NM_199327	CTCAAGTTGATATTTATAGCTGATCAATCTATATGTGTCACAGAACTATGCTGCCTAAAG
A_23_P110052	0.12368	0.00129	-4.44287	-0.64079	-1.71722	A_23_P110052	NM_023067	GCCCGAAAACCATAGACCTGGTTGTACTGTAGCTTGTTGTTTGGGGGACCAAATTTTCTA
A_23_P148372	0.12368	0.00129	4.43975	-0.64524	0.564038	A_23_P148372	NM_001325	CAGAACCAAGTCACTCCACAGGATCATGAGAAGGCTGCTTTGATTATGCAGGTTCTACAA
A_24_P73577	0.12368	0.0013	4.43902	-0.64627	0.94187	A_24_P73577	NM_170697	GCTAGATAAGATCTTTTCCAAAGTTTTTCTTAGAACCAACCAAAAAACAATCCGAGTAGG
A_23_P313632	0.12368	0.0013	-4.43643	-0.64996	-1.11881	A_23_P313632	NM_178155	CGGAACAGCTCCTTACTCTGAGGAAGTTGATTCTTATTTGATGGTGGTATTGTGACCACT
A_32_P934840	0.12368	0.0013	-4.43585	-0.65079	-0.453923	A_32_P934840	NM_052958	AGAGAATGGTTATTTTTATAATCTCAATAATAAACAAGTACTATCGTAGCCAGGGGGTGC
A_33_P3309319	0.12368	0.0013	-4.43566	-0.65106	-1.21588	A_33_P3309319	NM_145886	TCTCCAGTGTGTGGGGACGGGTCCCTGTGAGCAACAAAACTGCACTGTTTCTTTCACCTC
A_33_P3289426	0.12368	0.0013	-4.43456	-0.65264	-0.866833	A_33_P3289426	NM_173680	CCCAGCACCAGGGCCACTGCTGGCACGTCGTAGACATCCAATAAATATTTTTGGAAGGAG
A_23_P95130	0.12368	0.0013	4.43417	-0.65319	1.40255	A_23_P95130	NM_207113	TTGAGGGATACCTAATTTGCATTCGGTTAGGGGATATTTTTCAACCTCTTGCTTTATACT
A_33_P3231447	0.12379	0.00131	-4.4318	-0.65657	-1.83125	A_33_P3231447	NM_000210	CCGTAATTTAACTTTCTGGGTTGCCTTTATTTTTGGCGTGGCTGACTTACATCATGTGTT
A_24_P388528	0.12387	0.00132	-4.42871	-0.66097	-1.27861	A_24_P388528	NM_173216	ATGCAAATTATGATATGGACGTTATCATTGGTCTGGTGAGATGTTTCATATTTGTGACAG
A_23_P29303	0.12387	0.00132	4.42577	-0.66518	0.512523	A_23_P29303	NM_015703	GAGGACCGTATCCCCAGCCCACTGGGCTACGCAGCTATTCCAATCAAGTTCTCTGAAAAG
A_33_P3676746	0.12387	0.00133	-4.42339	-0.66858	-0.525454	A_33_P3676746	NM_019589	CTAGGATTAAAAACAATAAACTTTCATGATAAAGCCGATGAGATTCATGGGCTATACAGC
A_23_P86283	0.12387	0.00133	4.422	-0.67056	0.538464	A_23_P86283	NM_006762	CATCATAAAACAGTCCCTTCAAACACACAATTGTTCTGCTGAAGAGTTGTCATCAACAAT
A_23_P72668	0.12387	0.00133	-4.42198	-0.67058	-1.33401	A_23_P72668	NM_004657	AGAAAACATCTACGAAAGGTAAAAAGAGATGATCAGTTGGTTGTTTACTTGCTAGAAACC
A_32_P108655	0.12387	0.00133	4.42073	-0.67238	1.28809	A_32_P108655	NM_001005353	TGAAGAGGATCTTATTAAACTGCTGGTCTGACTTTATGGATTGACACTGTTCATTTCTTT
A_33_P3379644	0.12446	0.00134	4.41573	-0.67952	2.58791	A_33_P3379644	NM_000689	TGTCAAACCAGCAGAGCAAACTCCTCTCACTGCTCTCCACGTGGCATCTTTAATAAAAGA
A_24_P255654	0.12446	0.00135	4.41414	-0.68179	0.795438	A_24_P255654		GAACAAGACGTGATCTTGAGGGAGTTTCGTTATGGCTCTAGCGTTTTGATTACCACTGAC
A_23_P75811	0.1256	0.00136	4.40646	-0.69277	1.98676	A_23_P75811	NM_001012662	ATCCTGAGCCTACTCGAATCCAACAAAGACTTGCTGTTGACTAGCTCATACCTGTCTGAT
A_33_P3261353	0.12685	0.00138	-4.39691	-0.70644	-0.57617	A_33_P3261353	NR_033732	TCTCCATGGTGCAGTTGAAAATGATTGTTTGGAAATTGTCCGCCTCCTCCTTTCCTATGG
A_23_P48747	0.12685	0.00138	-4.39653	-0.70698	-1.27738	A_23_P48747	NM_138452	TTGGCAACAGATCCCAATATCCTGAGCCTGAGTGGTAAGGTGCTGCCATCCTGTGACCTT
A_33_P3363168	0.12685	0.00139	-4.39471	-0.70959	-1.01869	A_33_P3363168	NM_033389	CTGTTTTTAAATGTGAACTTGTGCGCAAATGTGCAGATTCAATGTTCTTGTTACAGATTG
A_24_P330518	0.12685	0.00139	4.39312	-0.71187	1.66917	A_24_P330518	NM_001218	CTGTCAAAAGACTCTGTATATCTTTTGTGGATGAGTTTTGTGAGAGAACAGAGAGACCAT
A_33_P3352522	0.12887	0.00142	-4.3812	-0.72895	-0.847667	A_33_P3352522	NR_044995	GATAACTTTACTACCAATGGCTAATGTGCAAACTCCTACAAATTGAGAAAAACAGGCAAA
A_23_P31686	0.12895	0.00142	-4.37908	-0.73201	-1.08855	A_23_P31686	NM_021174	AGAAAAAGGCTTTTCGAGTGTGGGACAAGGTCTGATGTCAGTGAACGGAATTGAAGAGCA
A_33_P3243558	0.12899	0.00142	4.37715	-0.73476	0.392027	A_33_P3243558	NM_001190228	TACTGCTGCTGGGGCTGTGGCAGCCTCTGCTGCCCACCCCTAGGCAGCCCCGAGGTCTGA
A_23_P146728	0.1293	0.00144	4.37213	-0.74197	0.651033	A_23_P146728	NM_033087	GCTATAATCATTCCAAATTTTGCCAGTGTTAAGTTACAAATGTGGTGTCATTCCATGTTC
A_32_P225355	0.1293	0.00144	-4.37207	-0.74206	-0.679075	A_32_P225355	NM_182485	ATTTAGCATTTATATATTTGTGTATGGAAAACACTTGATATTTTATCCCTGTTGCATCTG
A_23_P379034	0.1293	0.00144	4.36997	-0.74508	2.1696	A_23_P379034	NM_025045	ACACATGCCCTCTCTGTACATCTTTTGTAAATGATGAGAAATAAAGGAAGTGGACGCAAA
A_33_P3322274	0.1293	0.00145	4.36671	-0.74977	0.431666	A_33_P3322274	NM_001066	TATGGCCCCAGGGGCAGTACACTTACCCCAGCCAGTGTCCACACGATCCCAACACACGCA
A_33_P3289536	0.1293	0.00145	4.36381	-0.75393	0.741821	A_33_P3289536	NM_001199835	CACATGGATGTAAAGTAAATACAGCTCCGCAGGAATCCTGAAAAATAATTCTAATGTTAC
A_24_P362540	0.1293	0.00146	-4.36322	-0.75478	-0.407565	A_24_P362540	NM_003887	TGGTGCTATTGTGCAGTAACTAATAGTACTCTTACCAGAGGAGAAATTATATTAACGACC
A_23_P38482	0.1293	0.00146	-4.36282	-0.75536	-0.693683	A_23_P38482	NM_024297	CACTTCAAGGCAGGAATTCTCAAGGGAGACTTGTTTGAAAATGAGTGTCTCACTTTCCCA
A_23_P25605	0.1293	0.00146	-4.36004	-0.75935	-0.562612	A_23_P25605	NM_032138	GAAATACTACAAGGTTTAGACAGTCCATGAAATCGACCTGTTTAATAATTTACCATCCTG
A_33_P3218980	0.1293	0.00147	-4.35894	-0.76093	-0.387633	A_33_P3218980	NM_001776	GGTTATCTTATAGAGTCTCCTAGAATATTTCATTGGCATTGAGAAGGTGGAAAATGCAAA
A_33_P3280805	0.1293	0.00147	-4.35863	-0.76138	-0.933332	A_33_P3280805	NM_015842	AACAAATCCTTCAGGAAATGAGGAAGAGAACACCCCTTCACAATGACAACAGCTGGATCC
A_23_P252808	0.1293	0.00147	-4.35704	-0.76366	-1.03293	A_23_P252808	NM_012477	TGTGCACTACCCCCAGAGTCTGTACCGCAGATCTTTCCCATGGGGCTGTCTTCCAGTGAA
A_33_P3237110	0.13006	0.00148	-4.35163	-0.77145	-0.534611	A_33_P3237110	NM_001099652	CTCAGCTATATAATCAGTTTCAAACTGGTTGTAAAAGTATAGCTGTGGCCAATGAATGTA
A_23_P68007	0.13054	0.0015	-4.34578	-0.77988	-0.501983	A_23_P68007	NM_001679	GCCAACATCAAGTGACTTTATAGCTGCAAGAAATGTGGTATGTGGAGAAGTTCTGTATGT
A_23_P383118	0.13054	0.0015	-4.34426	-0.78206	-1.72268	A_23_P383118	NM_020883	GCTTTACTTTTTCTTTCTTCGACAAACTGTCACCTTTTTTACTCCAAACTGACCAAGAAG
A_32_P131367	0.13054	0.0015	4.3425	-0.78459	1.46718	A_32_P131367	NM_007282	CTGTCTCATCTTGATAGTCATTTTCATGATCACAAAATTTTTCCAGGATAGACATAGAGC
A_23_P154675	0.13054	0.00151	4.34075	-0.78713	0.548149	A_23_P154675	NM_198216	AGAACTCCAAACAAGCAGAAAGGGAAGAGAAGCGAGTCCTCGGTCTGGTGCTGCTGCGAG
A_23_P309361	0.13054	0.00152	-4.33674	-0.79289	-0.858077	A_23_P309361	NM_144584	CAGACTGCAGTGAGCCCTGAGAAAGATATGAGGGTTTAAAACGGGTGCTTTCCTTTGATT
A_24_P344961	0.13054	0.00152	-4.33485	-0.79562	-0.621518	A_24_P344961	NM_133265	CAGTCTCCTATTATCTCAATTGCTTATGTGCATATGGAATATGTTACTTAAAACGTGTGC
A_23_P122852	0.13054	0.00152	-4.33345	-0.79763	-0.747579	A_23_P122852	NM_003078	GGGCTCCAGCATCACTCCTCTGCCACCTTGGGGTGTGGGGCTGGATTAAAAGTCATTCAT
A_24_P378987	0.13054	0.00153	4.33229	-0.79932	1.03613	A_24_P378987	NM_145177	AACCTCTGCAGAACTTCAAGAAGCCAAATAAACATTTTGGAGGATAATCACCCCAAGTGG
A_24_P185186	0.13054	0.00153	-4.33042	-0.80201	-0.8936	A_24_P185186	NM_174920	AAGCAAACTAAAGAGCCTGGGGCTCAGCAACTCTCATGACCGGGCACTGGTGAAGCGCAA
A_33_P3258330	0.13054	0.00153	4.33006	-0.80253	0.57141	A_33_P3258330	NM_030792	CCGCGAGCCCAGGCTGTCACCTTCGTCCCGCCTCAGGCGAGGGGTTCAGCGCCTGCCCCG
A_24_P250650	0.13054	0.00154	-4.32748	-0.80626	-0.942761	A_24_P250650	NM_013412	CACCCCTCTCTGGTACTTGTGGCTTGCTAGTATGTTTTTATGATAATCTCGGGCATTGTT
A_24_P94402	0.13054	0.00154	-4.32643	-0.80778	-2.00383	A_24_P94402	NM_005378	GTTAATCTCTGTTATGTACTGTACTAATTCTTACACTGCCTGTATACTTTAGTATGACGC
A_32_P73045	0.13054	0.00154	4.32596	-0.80845	0.756934	A_32_P73045	NM_018686	AAGATGCTATTGGGATAAGTTTATTAAAGAAAAGTGGTATTGAGGTGAGGCTAATCTCAG
A_23_P431933	0.13054	0.00155	4.32381	-0.81155	0.999068	A_23_P431933	NM_032294	GCCCGAAGCTTAAAAAGTTACTCGGTACTGTTTTTAAGAACACTTTTATAGAGTTAGTGG
A_24_P166661	0.13054	0.00155	-4.32372	-0.81168	-0.505106	A_24_P166661	NM_032936	ACTGGTTCCTCATATTCATTCCAGTCTGGATATTTGATACTATCCTTCTTGTCCTGCTGA
A_33_P3339051	0.13054	0.00155	-4.32332	-0.81226	-1.38553	A_33_P3339051	NM_182498	ACAGTGGTCATGGGGGATGGGGTACTGCCGGTCTGTGTTGTCTTAGAAGTAGATGTGTGA
A_23_P320578	0.13088	0.00156	4.32007	-0.81695	2.23166	A_23_P320578	NM_002928	CTCTGAATGTGCTGGGAACCTCTTGGAGCCTGTCAGGAACTCCTCACTGTTTAAATATTT
A_23_P259393	0.13131	0.00157	4.3164	-0.82225	0.445481	A_23_P259393	NM_001005159	TGCTGGAAAGCACCCTTTTGGTTGTTTTCATTCTGTTCCCTCTCATTGTAGATTGAACTT
A_33_P3305974	0.13301	0.00159	4.30654	-0.83651	0.584702	A_33_P3305974	NM_003825	ACCAACAGAGATCGTATTGATATTGCCAATGCCAGAGCAAAGAAACTCATTGACAGCTAA
A_24_P329795	0.13301	0.00159	4.30503	-0.8387	3.09418	A_24_P329795	NM_007021	TGTGTTTTCTCTGGAGATAGAATGTAAACCATATTAAAAGGAAAAAGTTTCAGACAAGCA
A_23_P7684	0.13327	0.0016	-4.30155	-0.84372	-0.913689	A_23_P7684	NM_024565	ATTGTTCACCCAGCAGAACTGGGAGGTGCAAAGGACCGTGGAAGCAATTTTTGTTTTGTT
A_32_P66364	0.13327	0.00161	-4.29983	-0.84621	-0.787072	A_32_P66364	NM_001080545	ACCCCACACTCATACAGTAGCTATGCACATCCTGGAAGTCTCCTTGACTGAACTTTAGAA
A_33_P3261869	0.13327	0.00161	-4.2971	-0.85017	-0.839597	A_33_P3261869	NM_182795	AACTCTCCACTTTCAGGAGGCCCCCAGTGAAGAGCCCCACCTCGGGGTCACAATAAAGTT
A_23_P136635	0.13327	0.00162	-4.29634	-0.85126	-0.887852	A_23_P136635	NM_003664	TTTACTGTCAGTTGTCTCAACTCTTGAATCCATGTGGCGTTTTCTCTGTCCTGCTGCTTC
A_24_P235429	0.13327	0.00162	4.29528	-0.85281	1.82695	A_24_P235429	NM_005502	CCAAAGAGCCATGTGTCATGTAATACTGAACCACTTTGATATTGAGACATTAATTTGTAC
A_33_P3327200	0.13327	0.00162	4.29443	-0.85404	0.736384	A_33_P3327200	NM_001001396	ATCCCCAAGTGAAATATGTTGCGGTAGAGATGGAATGTATAAAATCCGCCAGTAGTGTGA
A_24_P382187	0.13358	0.00164	4.28773	-0.86375	1.91775	A_24_P382187	NM_001552	GAAAAATCTCATTCCCAGAGTCAGAGGAGAAGAGACATGTACCTTGACCATCGTCCTTCC
A_23_P501634	0.13358	0.00164	4.28685	-0.86502	1.01937	A_23_P501634	NM_078476	GCATGAATAAGCCAATTATAGGTTAATATAAGTAGAATGTTTGTGAAAAATAAGTATGGT
A_23_P314726	0.13358	0.00164	-4.28642	-0.86564	-0.951398	A_23_P314726	NM_002651	AGGTTCTTTCCACAGGCCATCCTCTTATTCCGTTCTGGGGCCCAGGAAGTGGGGAAGAGT
A_23_P64232	0.13358	0.00164	4.28584	-0.86648	0.798403	A_23_P64232	NM_003904	AGCGCTGCTCTTTCTGTAGGTTATTTATTAGTATTGGATGAAGGCGAAGGCTGGGAGTGT
A_23_P214244	0.13358	0.00164	-4.28527	-0.86731	-0.44398	A_23_P214244	NM_021572	TTCACTGTAGCATAGGGATAGATAAGATCCTGCTTTATTTGGACTTGGCGCAGATAATGT
[truncated: 33,707 more rows]

## Sheet: GSE91077 - ESF
ID	adj.P.Val	P.Value	t	B	logFC	SPOT_ID	GB_ACC	SEQUENCE
[truncated: 34,127 more rows]
